# Supplementary material for: SETDB1 enables development beyond cleavage stages by extinguishing the MERVL-driven two-cell totipotency transcriptional program in the mouse embryo
Source: eLife. 2026 Feb 16;15:RP109248. doi: 10.7554/eLife.109248 (PMC12908936; doi:10.7554/eLife.109248)
Supplement: Figure 1—figure supplement 2—source data 1. — GO term enrichment for DEGs identified in the four pairwise comparisons by gseGO in R package ClusterProfiler (v4.14.4). [file elife-109248-fig1-figsupp2-data1.xlsx]

## Sheet: GO_set_2cWT-set_2cKO_res
Figure 1–figure supplement 2–Source Data 1. Gene Set Enrichment Analysis (GSEA) on Gene ontology (GO). GO term enrichment for DEGs identified in the four pairwise comparisons by gseGO in R package ClusterProfiler (v4.14.4).
ONTOLOGY	ID	Description	setSize	enrichmentScore	NES	pvalue	p.adjust	qvalue	rank	leading_edge	core_enrichment
BP	GO:0007043	cell-cell junction assembly	111	-0.576416	-1.49559	0.000189696	0.0277473	0.0251234	3817	tags=40%, list=26%, signal=29%	Cldn4/Patj/Pkp2/Cdh20/Cldn3/Prkca/Epha2/Fer/Ikbkb/Cdh2/Cdh3/Cdh24/Wdr1/Ocln/Gja5/Irx3/Gjc1/Gjb2/Lsr/Cdh19/Tbcd/Marveld2/Wnt11/Cdh11/Cldn6/Frmpd2/Cdh18/Rab13/Hdac7/Cdh15/Pkp1/Nfasc/Ace/Ephb2/Ptpro/Cldn15/Ramp2/Snai2/Cldn7/Trpv4/Cldn9/Esam/Cldn8/Cldn34b2
BP	GO:0007186	G protein-coupled receptor signaling pathway	417	-0.493516	-1.32076	2.0525e-05	0.00412809	0.00373771	3748	tags=38%, list=26%, signal=29%	Sag/Nme2/Lgr4/Akap12/Qrfprl/Hcrt/Rgs10/Grm4/Rela/Lpar1/Kcnq1/Slit2/Grk4/Prkca/Prex1/Gipr/Itgb3/Fgf8/Gpr180/Adgra3/Acp3/Anxa1/Gng4/Gprc5a/Gpr149/Git1/Rgs2/Esr1/Slc26a6/Iqgap2/Vps54/Fzd9/Gpr35/Celsr1/Dtnbp1/Nlrp6/S1pr2/Prkar1b/Tgm2/Chrm3/Cmklr1/Vav1/Itpr3/Adgrl4/Adrb3/Adgrl2/Npr3/Arhgef1/Drd3/F2/Entrep1/Plek/Ric8a/Robo1/Lyn/Gipc1/Oprd1/Or51v8/Adgrg5/Arrdc3/Adm2/Wnt5a/Cdk5r1/Ezr/Tm2d1/Mrap/Cmklr2/Pa…
BP	GO:0007600	sensory perception	332	-0.48877	-1.30128	0.000508321	0.0430467	0.0389759	2657	tags=30%, list=18%, signal=25%	Mfrp/Lrig2/Fto/Igf1/Or51v8/Shank1/Dlg2/Ppt1/Rlbp1/Fabp5/Pde1c/Gjc1/Myo7b/Gjb2/Tas1r3/Or5d43/Slc1a3/Espn/Htr7/Srrm4/Kcna1/Dnajc19/Enpp1/Mc1r/Slc24a4/Barhl1/Serpinb6a/Ntrk1/Rpgr/Tmtc4/Tmc7/Gpr179/Abcb1a/Pomk/Marveld2/Wnt10b/Scn11a/Nr2f6/Or1ab2/Rd3/Rp1/Col2a1/Crb1/B3gnt2/Cacna1e/Tshz3/Cacnb4/Rgs9/Ntsr1/Scn9a/Cnga4/Kcnq4/Cln6/Kcnk2/Gnal/Or4a66/Bbs10/Ptprq/Or4f52/Cnga2/Nmu/Or10al2/Otogl/Cxcl12/Cacna2d…
BP	GO:0007389	pattern specification process	358	-0.487152	-1.29874	0.000257468	0.0295905	0.0267922	3654	tags=33%, list=25%, signal=26%	Cfap45/Spry1/Lef1/Eya1/Msx1/Ldb1/Irx1/Otx2/Dnah5/Nme7/Aida/Fgf8/Osr2/Cluap1/Tmem67/Ddit3/Lhx1/Rfx3/Tmed2/Gdf11/Foxd1/Acvr2a/Map3k4/Tctn1/Bmpr1b/Tcf15/Celsr1/Sox17/Tdrd6/Smad5/Zbtb16/Nbl1/Robo1/Emx2/Dbx1/Eomes/Nr2f2/Cited2/Wnt5a/Nek8/Pcsk5/Tbc1d32/Irx3/Pax6/Acvr2b/Gli1/Fgf1/Pierce2/Tbx20/Cdx2/Hey2/Ror2/Eng/Foxa1/Daw1/Wnt2b/Hey1/Wnt11/Efnb1/Helt/Grhl3/Wt1/Foxn4/Pbx1/Meis1/Tgfbr2/Dync2h1/Pofut1/Pax8…
BP	GO:0009887	animal organ morphogenesis	833	-0.45329	-1.2223	7.84006e-05	0.0140163	0.0126908	3619	tags=32%, list=25%, signal=26%	Pkp2/Id1/Lef1/Eya1/Nlrp5/Plau/Msx1/Exoc4/Nkx2-3/Rela/Gamt/Kcnq1/Irx1/Slit2/Gata3/Otx2/Twsg1/Flrt2/Fgf8/Osr2/Cluap1/Nab2/Tmem67/Insig2/Heg1/Lhx1/Phex/Tmed2/Gdf11/Epha2/Foxd1/Esr1/Tab1/Acvr2a/Pim1/Bmpr1b/Gaa/Tcf15/Fat3/Irx5/Pdgfra/Celsr1/Cd34/Elf3/Cdh2/Prkar1b/Rflnb/Tgm2/Igf2/Sox17/Angpt1/Fgf9/Mapk3/Tgfbr3/Hps1/Fgfrl1/Myo15a/Mecom/Tulp1/Gmppa/Hspg2/Six4/Nr3c1/Ccn1/Robo1/Tuba1a/Shank3/Sdk1/Mfap2/Mfr…
BP	GO:0050877	nervous system process	785	-0.446109	-1.20222	0.000389617	0.0391809	0.0354757	3138	tags=28%, list=22%, signal=23%	Gaa/Tcf15/Irx5/Fzd9/Rac3/Tmc2/Gpr35/Dtnbp1/S1pr2/Prkar1b/Clcn1/Dlg4/Igf2/Chrm3/Dbh/Wdr1/Itpr3/Jam2/Mapk3/Abat/Rab3a/Myo15a/Chmp2b/Tulp1/Pirb/Gmppa/Drd3/Creb1/Ric8a/Dlgap2/Tuba1a/Shank3/Mfrp/Insyn1/Spef2/Lrig2/Fto/Ncam1/Idua/Igf1/Actn3/Or51v8/Shank1/Dlg2/Ppt1/Lmx1a/Rlbp1/Nlgn3/Slc7a11/Fabp5/Pde1c/Fgf13/Rcsd1/Pax6/Gjc1/Ctns/Adgrb3/Myo7b/Gjb2/Tas1r3/Or5d43/Ntrk3/Slc1a3/Espn/Htr7/Srrm4/Cln3/Kcna1/Dna…
BP	GO:0048646	anatomical structure formation involved in morphogenesis	971	-0.43795	-1.18148	0.000211989	0.0284242	0.0257362	3610	tags=29%, list=25%, signal=24%	Id1/Lef1/Eya1/Plau/Msx1/Exoc4/Tcta/Rela/Nfatc2/Ldb1/Irx1/Slit2/Smoc2/Gata3/Otx2/Prkca/Twsg1/Itgb3/Pdcd6/Fgf8/Cluap1/Unc13d/Hc/Lhx1/Anxa1/Fbxw7/Tmed2/Shb/Epha2/Nrxn3/Foxd1/Nbeal2/Lepr/Sema3e/Nfkb2/Mylk3/Pim1/Itga2b/Tctn1/Mypn/Tcf15/Fat3/Mfge8/Pdgfra/Celsr1/Plxna3/Vegfb/Cd34/Tgm2/Igf2/Wdr1/Fn1/Robo4/Sox17/Jam2/Angpt1/Ppp3cb/Smad5/Tert/Fgf9/Ptgfrn/Mapk3/Tgfbr3/Ptpn6/Npr3/Hspg2/Six4/Ccn1/Robo1/Shank3…
CC	GO:0030312	external encapsulating structure	324	-0.517475	-1.37734	3.21587e-06	0.00103487	0.000937002	3057	tags=41%, list=21%, signal=33%	F13a1/Cilp/Tgm2/Igf2/Htra1/Fn1/Plxdc2/Papln/Angpt1/Fgf9/Agrn/Hpse2/Ltbp2/F2/Hspg2/Ccn1/Mfap2/Lrig2/Igf1/Spock2/Tril/Adamts15/Mmp15/Col5a1/Col7a1/Wnt5a/Colec12/Col24a1/Col19a1/Cthrc1/Ccn2/Adamtsl5/Clic3/Mfap5/Col6a2/Fgf1/Fbn1/Adamts14/Anxa3/Tnfrsf11b/Ntn4/Mmrn2/P3h2/Serpinb6a/Crispld2/Clu/Col4a3/Tnxb/Pcolce2/Matn1/Chadl/Loxl2/Wnt11/Smoc1/S100a10/Hpse/Adamts7/Col23a1/Fbn2/Rarres2/Adamts6/Lgals9/Col…
CC	GO:0031012	extracellular matrix	323	-0.515242	-1.37132	1.46608e-05	0.00336989	0.00305121	3057	tags=41%, list=21%, signal=33%	F13a1/Cilp/Tgm2/Igf2/Htra1/Fn1/Plxdc2/Papln/Angpt1/Fgf9/Agrn/Hpse2/Ltbp2/F2/Hspg2/Ccn1/Mfap2/Lrig2/Igf1/Spock2/Tril/Adamts15/Mmp15/Col5a1/Col7a1/Wnt5a/Colec12/Col24a1/Col19a1/Cthrc1/Ccn2/Adamtsl5/Clic3/Mfap5/Col6a2/Fgf1/Fbn1/Adamts14/Anxa3/Tnfrsf11b/Ntn4/Mmrn2/P3h2/Serpinb6a/Crispld2/Clu/Col4a3/Tnxb/Pcolce2/Matn1/Chadl/Loxl2/Wnt11/Smoc1/S100a10/Hpse/Adamts7/Col23a1/Fbn2/Rarres2/Adamts6/Lgals9/Col…
CC	GO:0005615	extracellular space	737	-0.514975	-1.38794	6.42387e-12	1.0336e-08	9.35856e-09	3410	tags=40%, list=23%, signal=33%	Ctsd/Flrt2/Gdf9/Fgf8/Hc/Vwa2/Pate2/Adnp/Acp3/Matn2/Anxa1/Wfdc18/Slc9a3/Cpa1/Gprc5a/Gdf11/Prl3b1/Lepr/Sema3e/Pam/Serpinf2/Itga2b/Tctn1/Lrrtm2/Mfge8/Ighg2b/Cubn/Vegfb/Xylt2/Cdnf/Cilp/Prss45/Igf2/Dbh/Fn1/Angpt1/Vgf/Fgf9/Scube3/C1ql4/Tgfbr3/Gfra1/Pirb/Agrn/Hpse2/C2/F2/Masp1/Il34/Nbl1/Ccn1/Selp/Il6ra/Cpxm1/Tfpi/Pla2g1b/Lrig2/Ceacam2/Serpinb3b/Idua/Wfdc15a/Igf1/Cd81/Tril/Olfm1/Adamts15/Havcr1/Mmp15/Sli…
CC	GO:0062023	collagen-containing extracellular matrix	254	-0.503699	-1.33351	0.000280253	0.0300618	0.0272189	3100	tags=40%, list=21%, signal=32%	Mfge8/F13a1/Cilp/Tgm2/Igf2/Htra1/Fn1/Plxdc2/Papln/Angpt1/Fgf9/Agrn/Ltbp2/F2/Hspg2/Ccn1/Mfap2/Igf1/Spock2/Adamts15/Col5a1/Col7a1/Colec12/Col24a1/Col19a1/Mfap5/Col6a2/Fbn1/Anxa3/Ntn4/Mmrn2/P3h2/Serpinb6a/Clu/Col4a3/Tnxb/Pcolce2/Matn1/Chadl/Loxl2/Smoc1/S100a10/Col23a1/Fbn2/Lgals9/Col2a1/Adamts4/Vwa5a/Tgm3/Anxa4/Mmp9/Angptl6/Efemp2/Plscr1/Gsto1/Thbs4/Col16a1/Entpd2/Col18a1/Tnr/Col9a2/Cstb/Adamts2/Lad…
CC	GO:0009986	cell surface	594	-0.480949	-1.29319	6.32524e-06	0.00169622	0.00153581	3423	tags=36%, list=24%, signal=29%	Unc5d/Itgb3/9830107B12Rik/Otoa/Slamf7/Fgf8/Adgra3/Heg1/Anxa1/Epha2/Lepr/Pam/Iqgap2/Acvr2a/Lrrc8a/Serpinf2/Itga2b/Enox2/Fzd9/Mfge8/Pdgfra/Abcc2/Tnfrsf11a/Cd34/Lamp1/Psg17/Scarb1/Cdh2/Robo4/Jam2/Tnfrsf22/Dip2a/Scube3/Hspa2/Tgfbr3/Plxnb3/Gfra1/Vtcn1/Pirb/Agrn/F2/Itga7/Selp/Il6ra/Robo1/Klrb1c/Il18rap/Tfpi/Ocln/Slc32a1/Pla2g1b/Ciita/Rtn4r/Ceacam2/Cd69/Ncam1/Nod2/Neo1/Cftr/Psg16/Itgb6/Dcc/Adamts15/Havc…
MF	GO:0004930	G protein-coupled receptor activity	134	-0.550887	-1.43789	0.000500161	0.0430467	0.0389759	3417	tags=44%, list=23%, signal=34%	Gipr/Adgra3/Gprc5a/Gpr149/Esr1/Fzd9/Gpr35/Celsr1/Nlrp6/S1pr2/Chrm3/Cmklr1/Adgrl4/Adrb3/Adgrl2/Npr3/Drd3/Oprd1/Vmn1r203/Adgrg5/Tm2d1/Cmklr2/Adgrb3/Tas1r3/Htr7/Vmn2r92/Vmn2r52/Mc1r/Vmn2r114/Fzd8/Gpr179/Adgrf5/Adgre5/Vmn2r94/Adcyap1r1/Ntsr1/Ramp3/Gprc5b/Ackr3/Gpr157/Npffr2/Ramp2/Gm5127/Grm1/Vmn1r227/Adora2b/Adgrv1/Galr3/Agtr1a/Gpr153/Adgra2/Celsr3/Chrm4/Ccr8/Adgre1/Calcrl/Sphk1/Npsr1/Grm6
MF	GO:0004888	transmembrane signaling receptor activity	382	-0.535533	-1.42847	2.29744e-08	1.84829e-05	1.67351e-05	3280	tags=41%, list=23%, signal=32%	Gprc5a/Gpr149/Epha2/Lepr/Esr1/Acvr2a/Bmpr1b/Fzd9/Gpr35/Pdgfra/Celsr1/Plxna3/Tnfrsf11a/Nlrp6/S1pr2/Epha7/Chrm3/Cmklr1/Adgrl4/Tgfbr3/Plxnb3/Adrb3/Ptpn6/Gfra1/Fgfrl1/Mfsd6/Pirb/Adgrl2/Npr3/Drd3/Il6ra/Robo1/Il18rap/Oprd1/Rtn4r/Cd69/Vmn1r203/Or51v8/Dcc/Adgrg5/Antxr1/Ptprm/Tm2d1/Grid1/Gfra3/Acvr2b/Tie1/Cmklr2/Adgrb3/Il20rb/Clec12a/Tas1r3/Or5d43/Ntrk3/Ghr/Htr7/Vmn2r92/Fcgr1/Vmn2r52/Ror2/Eng/Mc1r/Gabre/V…
MF	GO:0050839	cell adhesion molecule binding	232	-0.516011	-1.36458	0.000252911	0.0295905	0.0267922	3189	tags=36%, list=22%, signal=29%	Fermt3/Itga2b/Mypn/Mfge8/S1pr2/Cdh2/Cdh3/Cdh24/Igf2/Fn1/Jam2/Dab2/Gpnmb/Plxnb3/Ptpn6/Gfra1/Pirb/Utrn/Itga7/Ccn1/Selp/Lyn/Tenm2/Neo1/Igf1/Cd81/Itgb6/Ptprm/Cdk5r1/Ezr/Nlgn3/Ccn2/Nectin1/Fgf1/Fbn1/Cdh19/Izumo1r/Cntn2/Col4a3/Gfap/Thy1/Cdh11/Cdh18/Ndrg1/Thbs4/Nrcam/Obscn/Tspan8/Cdh15/Col16a1/Tnr/Itga4/Cxcl12/Pkp1/Nfasc/Kirrel3/Vwf/Olfm4/Ptprh/Postn/Cdhr5/Itga1/Timp2/Ctnna3/Ptpro/Ctnna2/Cntn5/Cldn7/Ada…
MF	GO:0030545	signaling receptor regulator activity	222	-0.508994	-1.34588	0.000472158	0.0430467	0.0389759	3064	tags=39%, list=21%, signal=31%	Vegfb/Cdnf/Epha7/Igf2/Osgin2/Fn1/Lypd6/Angpt1/Vgf/Fgf9/Gpnmb/Agrn/F2/Il34/Nbl1/Igf1/Adm2/Wnt5a/Mill2/Hspa1a/Ccn2/Mrap/Fgf13/Gdf5/Kitl/Clec12a/Pomc/Fgf1/Fbn1/Eng/Mmrn2/Ly6a/Wfikkn1/Clu/Wnt2b/Ccl22/Wnt11/Wnt10b/Rln3/Lta/Fbn2/Inhbb/Il23a/Retn/Gpr15lg/Prrt1/Thbs4/Cxcl13/Adh7/Cxcl12/Fgf7/Stc2/Wnt4/Sema4a/Ccl6/Ccl28/Lypd6b/Wnt7b/Il12b/Tg/Ctf2/Edn3/Nrtn/Cd274/Metrn/Prok1/Adm/Esp24/Amh/Lypd1/Cklf/Il11/Fn…
MF	GO:0038023	signaling receptor activity	516	-0.502562	-1.34937	4.17267e-07	0.000167846	0.000151973	3280	tags=37%, list=23%, signal=30%	Gprc5a/Gpr149/Epha2/Lepr/Esr1/Acvr2a/Bmpr1b/Nod1/Fzd9/Gpr35/Pdgfra/Celsr1/Plxna3/Cubn/Tnfrsf11a/Nlrp6/S1pr2/Scarb1/Epha7/Chrm3/Cmklr1/Robo4/Adgrl4/Tgfbr3/Plxnb3/Adrb3/Ptpn6/Gfra1/Fgfrl1/Mfsd6/Pirb/Adgrl2/Npr3/Drd3/F2/Nr3c1/Il6ra/Robo1/Klrb1c/Il18rap/Hnf4a/Oprd1/Rtn4r/Cd69/Nod2/Neo1/Vmn1r203/Tnfrsf19/Or51v8/Dcc/Adgrg5/Nr2f2/Antxr1/Ptprm/Colec12/Tm2d1/Nlgn3/Grid1/Gfra3/Acvr2b/Tie1/Nectin1/Cmklr2/Ad…
MF	GO:0060089	molecular transducer activity	516	-0.502562	-1.34937	4.17267e-07	0.000167846	0.000151973	3280	tags=37%, list=23%, signal=30%	Gprc5a/Gpr149/Epha2/Lepr/Esr1/Acvr2a/Bmpr1b/Nod1/Fzd9/Gpr35/Pdgfra/Celsr1/Plxna3/Cubn/Tnfrsf11a/Nlrp6/S1pr2/Scarb1/Epha7/Chrm3/Cmklr1/Robo4/Adgrl4/Tgfbr3/Plxnb3/Adrb3/Ptpn6/Gfra1/Fgfrl1/Mfsd6/Pirb/Adgrl2/Npr3/Drd3/F2/Nr3c1/Il6ra/Robo1/Klrb1c/Il18rap/Hnf4a/Oprd1/Rtn4r/Cd69/Nod2/Neo1/Vmn1r203/Tnfrsf19/Or51v8/Dcc/Adgrg5/Nr2f2/Antxr1/Ptprm/Colec12/Tm2d1/Nlgn3/Grid1/Gfra3/Acvr2b/Tie1/Nectin1/Cmklr2/Ad…
MF	GO:0005509	calcium ion binding	412	-0.48407	-1.29493	0.000164377	0.0264483	0.0239472	3354	tags=35%, list=23%, signal=27%	Cgref1/Vwa2/Matn2/Slc25a23/Heg1/Anxa1/Myl12b/Cetn3/Tbc1d8b/Pam/Fat2/Fat3/Celsr1/Cubn/Galnt3/Cdh2/Cdh3/Tgm2/Vwce/Cdh24/Itpr3/Ppp3cb/Adgrl4/Scube3/Agrn/Ltbp2/Nkd1/F2/Masp1/Hspg2/Selp/Pla2g1b/Dsc3/Ryr2/Cd69/Actn3/Spock2/Slit1/Cdk5r1/Asah2/S100g/Ryr1/Padi2/Ocm/Rasgrp2/Gjb2/Efcab11/Reps2/Fbn1/Micu3/Efcab7/Anxa3/Enpp1/Fkbp9/Arsa/Rcn3/Gsn/Matn1/Adgre5/Loxl2/H1f4/Cdh11/Smoc1/Cetn4/S100a10/Fbn2/Pla2g4d/Cr…

## Sheet: GO_set_8cWT-set_8cKO_res
Figure 1–figure supplement 2–Source Data 1. Gene Set Enrichment Analysis (GSEA) on Gene ontology (GO). GO term enrichment for DEGs identified in the four pairwise comparisons by gseGO in R package ClusterProfiler (v4.14.4).
ONTOLOGY	ID	Description	setSize	enrichmentScore	NES	pvalue	p.adjust	qvalue	rank	leading_edge	core_enrichment
BP	GO:0007155	cell adhesion	996	0.284941	1.2842	0.000257572	0.0146816	0.0127524	2448	tags=24%, list=17%, signal=21%	Flrt1/Sox2/Itpkb/Pla2g5/Stat5b/Mpzl2/Epha2/H2-Oa/Pkp2/Frmd5/Angpt1/Hmcn2/Marcks/Il20rb/Pcdh19/Emp2/Ccn6/Efs/Chrd/Cxcl12/Ccn2/Nlgn2/Gstp1/Laptm5/Socs1/Dusp3/Dchs1/Plxnb3/Lims2/Dab1/Efnb3/Ntn4/Jam3/Mdk/Ptafr/Cd74/Vwf/Tnfrsf13c/Sox4/Men1/Spam1/Ptprk/Npnt/Adgrg1/Adam32/Dbn1/Thsd1/Xbp1/Sdc4/Hmcn1/Ephb6/Nrp1/Cblb/Efemp2/Cdk6/Map2k5/Selp/Pbxip1/Rras/Onecut2/Ildr2/Slc4a2/Fbln2/Fat2/Acvr1/Hspb1/Ecm2/Igf2/…
BP	GO:0006082	organic acid metabolic process	668	0.286357	1.26913	0.00160663	0.0379394	0.032954	2266	tags=22%, list=16%, signal=19%	Lta4h/Eno2/Pla2g5/Ptges/Stat5b/Pla2g10/Prkag2/As3mt/Slc7a7/Scly/Tkfc/Cyp2f2/Acsf3/Gstp1/Agmat/Dbil5/Elovl7/Carns1/Acss1/Gcat/Cd74/Cyp2ab1/Tpk1/Prox1/Hnf1a/Tha1/Amacr/Acot3/Pdk3/Grhpr/Acsl6/Aldh4a1/Ldhc/Cbs/Fahd2a/Elovl1/Khk/Acad8/Cyp2c29/Il4i1/Acot1/Cyp2a22/Mpi/Aldoc/Cbfa2t3/Acsm2/Mri1/Ggt1/Got1l1/Enpp1/Acaa2/Insr/Pon3/Pfkfb1/Aldh3a2/Fabp5/Hmgcll1/Txnrd1/Dagla/Gpt/Pfkm/Jmjd8/Decr1/Phyh/Apoc1/Tnxb…
BP	GO:0140352	export from cell	728	0.28686	1.2771	0.00114411	0.0326072	0.0283225	1967	tags=18%, list=14%, signal=16%	Kcnn4/Cacna1e/Hcrt/Ralb/Vamp2/Ptges/Pla2g10/Micu3/Cacna1g/Gsdmd/Cxcl12/Ccn2/Syt2/Sri/Nlgn2/Ppfia3/Ptafr/Syt5/Lmf1/Exoc3l4/Sox4/Oscp1/Hnf1a/Rab3b/Klf7/Creb3l1/Xbp1/Sdc4/Hmox1/Piwil4/Doc2a/Slc18a2/Tspan18/Ildr2/Exoc4/Kcne1/Rhbdd3/Gpld1/Rcn3/Cyp19a1/Tgm2/Apbb3/Rab15/Srcin1/Sox11/Syt7/Asic1/Epb41l1/Trpa1/Grm8/C1qtnf12/Kcnd3/Golph3l/Cplx2/Tspoap1/Egfr/F2/Rab26/Gnaz/Kcnh2/Notch1/Tbx3/Steap2/Sybu/Gipr/S…
BP	GO:0007167	enzyme-linked receptor protein signaling pathway	746	0.29052	1.29208	0.000622785	0.0233969	0.0203225	2743	tags=26%, list=19%, signal=22%	Flrt1/Fam83b/Hesx1/Ralb/Stat5b/Kcp/Epha2/Dmrt1/Chrdl2/Angpt1/Adamts3/Marcks/Efs/Chrd/Ccn2/Sh3tc2/Socs1/Rasl11b/Dusp3/Efnb3/Zfp423/Men1/Pbld2/Ptprk/Npnt/Adgrg1/Creb3l1/Xbp1/Pid1/Ephb6/Nrp1/Cblb/Map2k5/Ift80/Onecut2/Megf8/Nrros/Acvr1/Hspb1/Ark2c/Igf2/Tbx2/Gpld1/Myof/Prlr/Sox11/Igfbp2/C1qtnf12/Foxc2/Onecut1/Efnb1/Zyx/Il17f/Klb/Fstl3/Col4a1/Egfr/Id1/Fbn2/Notch1/Msx1/Fstl1/Lrp2/Wfikkn1/Ephb2/Dll1/Enpp…
BP	GO:0006812	monoatomic cation transport	670	0.291028	1.29157	0.00148394	0.0366113	0.0318004	3136	tags=30%, list=22%, signal=25%	Kcnn4/Cd19/Slc24a5/Cacna1e/Hcrt/Vamp2/Kcnu1/Slc11a1/Atp2a1/Micu3/Kcnq5/Cacna1g/Kcnq4/Cxcl12/Ccn2/Gnb2/Sri/Stac3/Slc15a2/Tcn2/Kcnk12/Kcnf1/Bin1/Slc28a3/Grin3a/Tmc2/Panx2/Slc18a2/Slc6a16/Tspan18/Hephl1/Kcne1/Kcnb2/Slc25a13/Camk2d/Asic1/Trpa1/Kcna1/Plcb4/Trpc6/Kcnd3/Ppif/Commd3/Chrnd/Slc25a14/Amigo1/Nipal3/F2/Kcnh2/Lcn2/Orai3/Steap2/Cacna2d4/Lrp2/Anxa6/Cacnb3/Slc38a2/Dpp10/Slc22a5/Pon3/Tmem63a/Tspan…
BP	GO:0048871	multicellular organismal-level homeostasis	659	0.291156	1.29125	0.000854401	0.0276926	0.0240537	2176	tags=21%, list=15%, signal=18%	Nkx2-3/Hcrt/Itpkb/Ptges/Stat5b/Slc11a1/Pla2g10/Angpt1/Lrrk1/Il20rb/Adgrf5/Ccn2/Rp1/Pcsk1n/Nfix/Jam3/Zfp423/Slc28a3/Cd74/Tnfrsf13c/Sox4/Men1/Pmaip1/Gadd45g/Pbld2/Hnf1a/Adgrg1/Hmox1/Piwil4/Cdk6/Ift80/Ildr2/Slc4a2/Hephl1/Slc2a1/Rcn3/Cyp19a1/Bscl2/Prlr/Tmem18/Adrb3/Zfp516/Foxc2/Ccdc154/Egfr/Id1/Muc13/Lcn2/Chst3/Naglu/Notch1/Cmklr1/Fam210b/Tnfrsf11b/Traf3ip2/Fstl1/Dll1/Cfh/Enpp1/Slc22a5/Adcy6/Arhgef5/…
BP	GO:0032940	secretion by cell	680	0.291305	1.29013	0.00157912	0.0378303	0.0328592	1967	tags=18%, list=14%, signal=16%	Kcnn4/Cacna1e/Hcrt/Ralb/Vamp2/Ptges/Pla2g10/Micu3/Cacna1g/Gsdmd/Cxcl12/Ccn2/Syt2/Sri/Nlgn2/Ppfia3/Ptafr/Syt5/Lmf1/Exoc3l4/Sox4/Hnf1a/Rab3b/Klf7/Creb3l1/Xbp1/Sdc4/Hmox1/Piwil4/Doc2a/Slc18a2/Tspan18/Ildr2/Exoc4/Rhbdd3/Gpld1/Rcn3/Cyp19a1/Tgm2/Apbb3/Rab15/Srcin1/Sox11/Syt7/Asic1/Epb41l1/Trpa1/Grm8/C1qtnf12/Golph3l/Cplx2/Tspoap1/Egfr/F2/Rab26/Gnaz/Notch1/Tbx3/Steap2/Sybu/Gipr/Slc38a2/Myom1/Runx1/Spi1/…
BP	GO:0072359	circulatory system development	937	0.294061	1.32895	6.54122e-05	0.00600702	0.00521767	2410	tags=24%, list=17%, signal=21%	Eomes/Rarb/Epha2/Sgcd/Pkp2/Angpt1/Emp2/Adgrf5/Ccn6/Chrd/Cxcl12/Ccn2/Uts2r/Trip10/Tbc1d32/Dchs1/Zfp418/Cdx2/Nfix/Jam3/Mdk/Thsd7a/Sall1/Sox4/Synpo2l/Prox1/Lmo4/Adgrg1/Adprhl1/Creb3l1/Xbp1/Nrp1/Hmox1/Hey2/Sp100/Efemp2/E2f7/Map2k5/Rras/Apob/Tspan18/Notch3/Gli2/Megf8/Trp73/Adamts6/Acvr1/Hspb1/Casp8/Igf2/Tbx2/Gpld1/Sgcb/Tgm2/Tbx6/Camk2d/Ift122/Dsp/Sox11/Pdlim3/Asb2/Foxc2/Pcsk5/Il17f/Col4a1/Gng5/Egfr/Si…
BP	GO:0035295	tube development	923	0.294876	1.3281	7.44454e-05	0.00647675	0.00562568	2476	tags=24%, list=17%, signal=21%	Lta4h/Gsc/Nkx2-3/Hesx1/Sox2/Cthrc1/Rarb/Epha2/Sgcd/Cat/Angpt1/Marcks/Emp2/Adgrf5/Ccn6/Chrd/Cxcl12/Ccn2/Uts2r/Tbc1d32/Dchs1/Cdx2/Jam3/Mdk/Thsd7a/Sall1/Sox4/Prox1/Lmo4/Npnt/Adgrg1/Grhl3/Etv4/Creb3l1/Xbp1/Sdc4/Rcbtb2/Nrp1/Hmox1/Hey2/Sp100/Efemp2/E2f7/Map2k5/Rras/Apob/Tspan18/Notch3/Gli2/Megf8/Trp73/Acvr1/Hspb1/Casp8/Igf2/Tbx2/Gpld1/Rcn3/Tgm2/Tbx6/Ift122/Sox11/Asb2/Foxc2/Irx2/Pcsk5/Il17f/Col4a1/Egfr/…
BP	GO:0034220	monoatomic ion transmembrane transport	628	0.295372	1.30795	0.00155712	0.0378303	0.0328592	2914	tags=29%, list=20%, signal=25%	Kcnn4/Cd19/Slc24a5/Cacna1e/Vamp2/Kcnu1/Clcn1/Slc11a1/Atp2a1/Micu3/Kcnq5/Cacna1g/Kcnq4/Ccn2/Gnb2/Sri/Stac3/Slc15a2/Tcn2/Kcnk12/Kcnf1/Bin1/Slc28a3/Grin3a/Tmc2/Panx2/Slc18a2/Slc6a16/Slc4a2/Kcne1/Kcnb2/Slc25a13/Camk2d/Asic1/Trpa1/Kcna1/Plcb4/Trpc6/Kcnd3/Ppif/Chrnd/Slc25a14/Amigo1/Gabrd/Nipal3/F2/Kcnh2/Lcn2/Nlgn3/Orai3/Steap2/Cacna2d4/Ephb2/Anxa6/Cacnb3/Slc38a2/Dpp10/Slc26a9/Sfxn5/Tmem63a/Tspan13/Abcb…
BP	GO:0048646	anatomical structure formation involved in morphogenesis	951	0.297502	1.34107	3.88529e-05	0.00535199	0.00464871	2416	tags=25%, list=17%, signal=22%	Gsc/Eomes/Hesx1/Sox2/Cthrc1/Atp8a2/Macroh2a1/Epha2/Angpt1/Emp2/Ccn6/Chrd/Cxcl12/Ccn2/Uts2r/Phldb1/Dchs1/Cdx2/Nfix/Jam3/Mdk/Thsd7a/Sall1/Tnfrsf13c/Synpo2l/Prox1/Hnf1a/Lmo4/Col5a2/Adgrg1/Adprhl1/Grhl3/Creb3l1/Xbp1/Sdc4/Ccng1/Nrp1/Hmox1/Hey2/Sp100/E2f7/Map2k5/Rras/Tspan18/Slc4a2/Notch3/Gli2/Exoc4/Acvr1/Hspb1/Casp8/Tmod1/Igf2/Tbx2/Gpld1/Camk1/Tgm2/Tbx6/Ift122/Sox11/Foxc2/Irx2/Il17f/Ccdc38/Col4a1/Gng5…
BP	GO:0046903	secretion	761	0.299053	1.32672	0.000217006	0.0128111	0.0111277	1904	tags=18%, list=13%, signal=17%	Kcnn4/Nkx2-3/Cacna1e/Hcrt/Ralb/Pla2g5/Vamp2/Ptges/Stat5b/Pla2g10/Micu3/Cacna1g/Gsdmd/Cxcl12/Ccn2/Syt2/Sri/Nlgn2/Ppfia3/Ptafr/Syt5/Lmf1/Exoc3l4/Cd74/Sox4/Hnf1a/Rab3b/Klf7/Creb3l1/Xbp1/Sdc4/Hmox1/Piwil4/Doc2a/Slc18a2/Tspan18/Ildr2/Exoc4/Trp73/Rhbdd3/Gpld1/Stard10/Rcn3/Cyp19a1/Tgm2/Apbb3/Rab15/Prlr/Srcin1/Sox11/Syt7/Asic1/Epb41l1/Trpa1/Grm8/C1qtnf12/Golph3l/Cplx2/Tspoap1/Egfr/F2/Rab26/Gnaz/Notch1/Tb…
BP	GO:0030155	regulation of cell adhesion	601	0.299736	1.32261	0.000975369	0.0304205	0.0264231	2460	tags=24%, list=17%, signal=20%	Sox2/Itpkb/Pla2g5/Stat5b/Epha2/H2-Oa/Pkp2/Frmd5/Angpt1/Il20rb/Emp2/Chrd/Cxcl12/Gstp1/Laptm5/Socs1/Dusp3/Plxnb3/Lims2/Dab1/Efnb3/Jam3/Mdk/Ptafr/Cd74/Tnfrsf13c/Sox4/Men1/Npnt/Adgrg1/Dbn1/Xbp1/Sdc4/Ephb6/Nrp1/Cblb/Efemp2/Cdk6/Map2k5/Selp/Rras/Onecut2/Ildr2/Slc4a2/Fbln2/Hspb1/Ecm2/Igf2/Tgm2/Prlr/Srcin1/Spock2/Igfbp2/Foxc2/Postn/Pcsk5/Onecut1/Efnb1/Fstl3/Il4i1/Notch1/Ephb2/Dll1/Phldb2/Lama5/Runx1/Spi1…
BP	GO:0098660	inorganic ion transmembrane transport	576	0.299813	1.31744	0.00108035	0.031914	0.0277204	2946	tags=29%, list=21%, signal=24%	Kcnn4/Cd19/Slc24a5/Cacna1e/Vamp2/Kcnu1/Clcn1/Slc11a1/Atp2a1/Micu3/Kcnq5/Cacna1g/Kcnq4/Ccn2/Gnb2/Sri/Stac3/Slc15a2/Tcn2/Kcnk12/Kcnf1/Bin1/Slc28a3/Grin3a/Tmc2/Slc18a2/Slc6a16/Slc4a2/Kcne1/Kcnb2/Slc25a13/Camk2d/Asic1/Trpa1/Kcna1/Plcb4/Trpc6/Kcnd3/Ppif/Slc25a14/Amigo1/Gabrd/Nipal3/F2/Kcnh2/Lcn2/Orai3/Steap2/Cacna2d4/Cacnb3/Slc38a2/Dpp10/Slc26a9/Tspan13/Ank1/Abcb8/Scn9a/Kcnn1/Tgfb1/Kcnk2/Clic3/Slc12a5…
BP	GO:0098655	monoatomic cation transmembrane transport	537	0.30034	1.31376	0.00207241	0.045075	0.039152	3136	tags=31%, list=22%, signal=25%	Kcnn4/Cd19/Slc24a5/Cacna1e/Vamp2/Kcnu1/Slc11a1/Atp2a1/Micu3/Kcnq5/Cacna1g/Kcnq4/Ccn2/Gnb2/Sri/Stac3/Slc15a2/Tcn2/Kcnk12/Kcnf1/Bin1/Slc28a3/Grin3a/Tmc2/Slc18a2/Slc6a16/Kcne1/Kcnb2/Slc25a13/Camk2d/Asic1/Trpa1/Kcna1/Plcb4/Trpc6/Kcnd3/Ppif/Slc25a14/Amigo1/Nipal3/F2/Kcnh2/Lcn2/Orai3/Steap2/Cacna2d4/Cacnb3/Slc38a2/Dpp10/Tmem63a/Tspan13/Abcb8/Scn9a/Kcnn1/Tgfb1/Kcnk2/Slc29a4/Slc12a5/Fkbp1b/Surf1/Plcb3/Or…
BP	GO:0098662	inorganic cation transmembrane transport	521	0.300478	1.31054	0.00201752	0.0449814	0.0390706	3136	tags=31%, list=22%, signal=25%	Kcnn4/Cd19/Slc24a5/Cacna1e/Vamp2/Kcnu1/Slc11a1/Atp2a1/Micu3/Kcnq5/Cacna1g/Kcnq4/Ccn2/Gnb2/Sri/Stac3/Slc15a2/Tcn2/Kcnk12/Kcnf1/Bin1/Slc28a3/Grin3a/Tmc2/Slc18a2/Slc6a16/Kcne1/Kcnb2/Slc25a13/Camk2d/Asic1/Trpa1/Kcna1/Plcb4/Trpc6/Kcnd3/Ppif/Slc25a14/Amigo1/Nipal3/F2/Kcnh2/Lcn2/Orai3/Steap2/Cacna2d4/Cacnb3/Slc38a2/Dpp10/Tspan13/Ank1/Abcb8/Scn9a/Kcnn1/Tgfb1/Kcnk2/Slc12a5/Fkbp1b/Surf1/Plcb3/Orai1/Slc38a4…
BP	GO:0060429	epithelium development	995	0.304254	1.37133	5.22021e-06	0.0028313	0.00245926	2741	tags=26%, list=19%, signal=23%	Bcl11b/Lta4h/Gsc/Hesx1/Sox2/Cthrc1/Krt7/Stat5b/Macroh2a1/Rarb/Pla2g10/Epha2/Dmrt1/Pnpla1/Cat/Angpt1/Marcks/Chrd/Cxcl12/Tdrd7/Tbc1d32/Dchs1/Ntn4/Cdx2/Nfix/Mdk/Sall1/Sox4/Men1/Prox1/Lmo4/Npnt/Klf7/Grhl3/Etv4/Xbp1/Sdc4/Ankrd24/Adamtsl4/Nrp1/Hey2/Krt12/E2f7/Cdk6/Ift80/Onecut2/Dmbt1/Gli2/Megf8/Trp73/Acvr1/Casp8/Kcne1/Tmod1/Tbx2/Rcn3/Tgm2/Tbx6/Ift122/Prlr/Msn/Dsp/Sox11/Asb2/Apcdd1/Elovl1/Foxc2/Irx2/Krt…
BP	GO:0070201	regulation of establishment of protein localization	486	0.305724	1.32354	0.00128911	0.0349329	0.0303425	3231	tags=26%, list=23%, signal=21%	Kcnn4/Cacna1e/Vamp2/Angpt1/Sri/Nlgn2/Sh3tc2/Sox4/Pmaip1/Hnf1a/Txn1/Klf7/Xbp1/Piwil4/Sp100/Exoc4/Kcne1/Rhbdd3/Gpld1/Camk1/Apbb3/Srcin1/Syt7/Epb41l1/Trpa1/C1qtnf12/Golph3l/Egfr/F2/Gnaz/Lrp2/Sybu/Gipr/Cacnb3/Myom1/Arhgef5/Ahi1/Ffar2/Smo/Tgfb1/Pfkm/Fkbp1b/Stx4a/4930550C14Rik/Orai1/Tek/Septin8/Abat/Tmem30b/Efna5/Hdac3/Acd/Sergef/Akap5/Ptgs2/Cd36/Cftr/Exph5/Commd1/Hmgn3/Madd/Sirt3/Gnas/Efcab7/Pak1/Plk3…
BP	GO:0045596	negative regulation of cell differentiation	529	0.306267	1.336	0.00123077	0.0339076	0.029452	2505	tags=23%, list=18%, signal=19%	Sox2/Itpkb/Stat5b/Rarb/Pkp2/Ranbp3l/Chrd/Bhlhe41/Socs1/Rpl3l/Dab1/Efnb3/Zfp418/Mdk/Sema3f/Sall1/Cd74/Sox4/Men1/Prox1/Col5a2/Tlx3/Xbp1/Ptgr3/Nrp1/Hey2/Cdk6/Atf5/Slc4a2/Notch3/Gli2/Trp73/Hspb1/Igf2/Glis1/Tbx6/Sox11/Tmem176b/Btg2/Trpc6/Fstl3/Egfr/F2/Id1/Adamts7/Notch1/Pbx1/Tbx3/Tnfrsf11b/Prtg/Msx1/Ephb2/Dll1/Enpp1/Ntn1/Tob1/Rgma/Runx1/Sox6/Smo/Tgfb1/Smad7/Oog1/Hdac7/Hoxa7/Col5a1/Gata3/Hdac8/Id3/Ncor…
BP	GO:0007423	sensory organ development	489	0.306865	1.33104	0.00133426	0.0355732	0.0308988	2177	tags=22%, list=15%, signal=20%	Bcl11b/Gsc/Hesx1/Sox2/Cthrc1/Prkra/Atp8a2/Rarb/Epha2/Kcnq4/Tdrd7/Tbc1d32/Dchs1/Rp1/Nfix/Sox4/Prox1/Dio3/Col5a2/Grhl3/Rcn1/Sdc4/Ankrd24/Nrp1/Hey2/Grk1/Krt12/Gli2/Rpl24/Tmod1/Tbx2/Ift122/Sox11/Pbx2/Foxc2/Col4a1/Egfr/Six1/Sh3pxd2b/Fbn2/Cebpd/Naglu/Notch1/Pbx1/Tbx3/Msx1/Lhfpl5/Ephb2/Arl6/Dll1/Cfh/Enpp1/Notch2/Ntn1/Impg2/Myom1/Slc38a8/Smarcd3/Vangl2/Ahi1/Prom1/Tgfb1/Kcnk2/Ptprq/Slc44a4/Ntrk2/Col2a1/Ne…
BP	GO:0071363	cellular response to growth factor stimulus	550	0.307708	1.34681	0.000996931	0.0305172	0.0265071	2413	tags=23%, list=17%, signal=20%	Plk5/Flrt1/Stat5b/Kcp/Cat/Chrdl2/Angpt1/Adamts3/Chrd/Ccn2/Gstp1/Rasl11b/Dusp3/Nfix/Zfp423/Men1/Pbld2/Ptprk/Npnt/Adgrg1/Dbn1/Creb3l1/Xbp1/Nrp1/Map2k5/Ift80/Onecut2/Megf8/Nrros/Acvr1/Hspb1/Ark2c/Tbx2/Myof/Sox11/Kcnd3/Postn/Onecut1/Zyx/Il17f/Klb/Fstl3/Egfr/Id1/Fbn2/Adamts7/Notch1/Msx1/Fstl1/Lrp2/Wfikkn1/Dll1/Enpp1/Notch2/Insr/Tob1/Rgma/Runx1/Vegfb/Spi1/Igf1r/Sox6/Dlx3/Lrp8/Tgfb1/Smad7/Ntrk2/Col2a1/M…
BP	GO:0030855	epithelial cell differentiation	544	0.310136	1.35848	0.000446298	0.0182237	0.015829	2168	tags=22%, list=15%, signal=20%	Bcl11b/Lta4h/Sox2/Krt7/Stat5b/Macroh2a1/Rarb/Epha2/Dmrt1/Pnpla1/Chrd/Tdrd7/Cdx2/Sall1/Sox4/Men1/Prox1/Klf7/Etv4/Xbp1/Ankrd24/Adamtsl4/Hey2/Krt12/E2f7/Cdk6/Ift80/Onecut2/Dmbt1/Gli2/Trp73/Acvr1/Kcne1/Tmod1/Prlr/Msn/Dsp/Sox11/Foxc2/Krt75/Onecut1/Col4a1/Six1/Aldoc/Id1/Anxa4/Notch1/Tbx3/Ggt1/Sox18/Msx1/Lhfpl5/Fstl1/Dll1/Notch2/Ptpro/Dnase1l2/Ahi1/Wnt11/Dlx3/Smo/Prom1/Tgfb1/Ezr/Krt28/Ptprq/Slc44a4/Hoxa…
BP	GO:0009887	animal organ morphogenesis	811	0.310437	1.38363	1.08753e-05	0.0028313	0.00245926	2446	tags=25%, list=17%, signal=22%	Bcl11b/Gsc/Nkx2-3/Hesx1/Sox2/Cthrc1/Prkra/Atp8a2/Rarb/Epha2/Pkp2/Angpt1/Kcnq4/Emp2/Spef2/Ccn2/Tdrd7/Dchs1/Lims2/Ntn4/Rp1/Nfix/Mdk/Sall1/Sox4/Synpo2l/Men1/Prox1/Hnf1a/Dio3/Col5a2/Npnt/Adprhl1/Grhl3/Etv4/Xbp1/Ankrd24/Nrp1/Hey2/Grk1/Efemp2/Ift80/Slc4a2/Gli2/Exoc4/Megf8/Acvr1/Igf2/Tbx2/Tgm2/Tbx6/Ift122/Msn/Dsp/Cbs/Sox11/Asb2/Apcdd1/Pbx2/Uncx/Foxc2/Irx2/Ccdc154/Gng5/Egfr/Six1/Sh3pxd2b/Id1/Fbn2/Naglu/N…
BP	GO:0051046	regulation of secretion	487	0.31161	1.34945	0.00055089	0.0216815	0.0188324	1904	tags=19%, list=13%, signal=17%	Kcnn4/Cacna1e/Hcrt/Vamp2/Ptges/Pla2g10/Micu3/Cacna1g/Cxcl12/Syt2/Sri/Nlgn2/Ptafr/Syt5/Cd74/Sox4/Hnf1a/Rab3b/Klf7/Xbp1/Sdc4/Hmox1/Piwil4/Doc2a/Rhbdd3/Gpld1/Cyp19a1/Apbb3/Rab15/Srcin1/Sox11/Syt7/Asic1/Epb41l1/Trpa1/Grm8/C1qtnf12/Golph3l/Tspoap1/Egfr/F2/Rab26/Gnaz/Notch1/Sybu/Gipr/Slc38a2/Myom1/Runx1/Spi1/Cspg5/Ahi1/Fes/Ffar2/Tgfb1/Ntrk2/Pfkm/Osm/Fkbp1b/Ada/Stx4a/Orai1/Abat/Efna5/Stk39/Ildr1/Map2k6/…
BP	GO:0035239	tube morphogenesis	731	0.312545	1.38996	1.41856e-05	0.00293109	0.00254593	2476	tags=25%, list=17%, signal=22%	Nkx2-3/Hesx1/Sox2/Cthrc1/Epha2/Sgcd/Angpt1/Emp2/Adgrf5/Ccn6/Chrd/Cxcl12/Ccn2/Uts2r/Dchs1/Jam3/Mdk/Thsd7a/Sall1/Sox4/Prox1/Lmo4/Npnt/Adgrg1/Grhl3/Etv4/Creb3l1/Xbp1/Sdc4/Nrp1/Hmox1/Hey2/Sp100/Efemp2/E2f7/Map2k5/Rras/Apob/Tspan18/Notch3/Gli2/Megf8/Trp73/Acvr1/Hspb1/Casp8/Igf2/Tbx2/Gpld1/Tgm2/Tbx6/Ift122/Sox11/Asb2/Foxc2/Irx2/Il17f/Col4a1/Egfr/Six1/Id1/Lcn2/Hspb6/Naglu/Notch1/Pbx1/Tbx3/Sox18/Lrp2/Eph…
BP	GO:1903530	regulation of secretion by cell	458	0.314779	1.35514	0.00146528	0.0366113	0.0318004	2735	tags=25%, list=19%, signal=21%	Kcnn4/Cacna1e/Hcrt/Vamp2/Ptges/Pla2g10/Micu3/Cacna1g/Cxcl12/Syt2/Sri/Nlgn2/Ptafr/Syt5/Sox4/Hnf1a/Rab3b/Klf7/Sdc4/Hmox1/Piwil4/Doc2a/Rhbdd3/Gpld1/Cyp19a1/Apbb3/Rab15/Srcin1/Sox11/Syt7/Asic1/Epb41l1/Trpa1/Grm8/C1qtnf12/Golph3l/Tspoap1/Egfr/F2/Rab26/Gnaz/Notch1/Sybu/Gipr/Slc38a2/Myom1/Runx1/Spi1/Cspg5/Ahi1/Fes/Ffar2/Tgfb1/Ntrk2/Pfkm/Osm/Fkbp1b/Stx4a/Orai1/Abat/Efna5/Ildr1/Map2k6/Sergef/Kcnc3/Pnkd/Cf…
BP	GO:0048514	blood vessel morphogenesis	499	0.32043	1.39624	0.00044925	0.0182237	0.015829	2467	tags=27%, list=17%, signal=23%	Epha2/Sgcd/Angpt1/Emp2/Adgrf5/Ccn6/Chrd/Cxcl12/Ccn2/Uts2r/Jam3/Mdk/Thsd7a/Sox4/Prox1/Adgrg1/Creb3l1/Xbp1/Nrp1/Hmox1/Hey2/Sp100/Efemp2/E2f7/Map2k5/Rras/Apob/Tspan18/Notch3/Megf8/Acvr1/Hspb1/Casp8/Igf2/Tbx2/Gpld1/Tgm2/Tbx6/Foxc2/Il17f/Col4a1/Six1/Id1/Hspb6/Naglu/Notch1/Sox18/Lrp2/Ephb2/Adm/Dll1/Cfh/Enpp1/Notch2/Tnni3/Runx1/Vegfb/E2f2/Spi1/Vangl2/Wnt11/Adm2/Arhgap22/Smo/Tgfb1/Clic3/Smad7/Ntrk2/Rasip…
BP	GO:0070848	response to growth factor	571	0.320445	1.40944	5.61635e-05	0.00589449	0.00511993	2413	tags=24%, list=17%, signal=20%	Plk5/Flrt1/Sox2/Stat5b/Kcp/Epha2/Cat/Chrdl2/Angpt1/Adamts3/Chrd/Ccn2/Gstp1/Rasl11b/Dusp3/Fndc4/Nfix/Zfp423/Men1/Pbld2/Ier2/Ptprk/Npnt/Adgrg1/Dbn1/Creb3l1/Xbp1/Nrp1/Map2k5/Ift80/Onecut2/Megf8/Nrros/Acvr1/Hspb1/Ark2c/Tbx2/Myof/Sox11/Kcnd3/Postn/Onecut1/Zyx/Il17f/Klb/Fstl3/Egfr/Id1/Fbn2/Adamts7/Notch1/Msx1/Fstl1/Lrp2/Wfikkn1/Dll1/Enpp1/Notch2/Insr/Tob1/Rgma/Runx1/Vegfb/Spi1/Igf1r/Sox6/Dlx3/Lrp8/Tgfb…
BP	GO:0051050	positive regulation of transport	693	0.321049	1.42374	1.19898e-05	0.0028313	0.00245926	2905	tags=27%, list=20%, signal=22%	Kcnn4/Cd19/Dnm1/Hcrt/Pla2g5/Vamp2/Ptges/Atp8a2/Slc11a1/Atp2a1/Pla2g10/Micu3/Angpt1/Cacna1g/Cxcl12/Syt2/Sri/Nlgn2/Stac3/Ptafr/Syt5/Bin1/Pltp/Sox4/Hnf1a/Rab3b/Prap1/Xbp1/Sdc4/Eepd1/Doc2a/Acsl6/Kcne1/Gpld1/Cyp19a1/Camk1/Apbb3/Rab15/Msn/Sox11/Syt7/Kctd7/Trpa1/C1qtnf12/Trpc6/Amigo1/Golph3l/Egfr/F2/Kcnh2/Lcn2/Nlgn3/Lrp2/Sybu/Gipr/Ephb2/Cacnb3/Dll1/Bok/Insr/Myom1/Arhgef5/Runx1/Repin1/Aoc3/Ahi1/Ffar2/Smo…
BP	GO:0051223	regulation of protein transport	406	0.323243	1.39355	0.000694679	0.024432	0.0212215	3257	tags=26%, list=23%, signal=21%	Kcnn4/Cacna1e/Vamp2/Angpt1/Sri/Nlgn2/Sh3tc2/Sox4/Hnf1a/Txn1/Klf7/Xbp1/Piwil4/Sp100/Exoc4/Rhbdd3/Gpld1/Camk1/Apbb3/Srcin1/Syt7/Epb41l1/Trpa1/C1qtnf12/Golph3l/Egfr/F2/Gnaz/Lrp2/Sybu/Gipr/Myom1/Arhgef5/Ahi1/Ffar2/Smo/Tgfb1/Pfkm/Fkbp1b/Stx4a/Orai1/Tek/Septin8/Abat/Tmem30b/Efna5/Hdac3/Sergef/Akap5/Ptgs2/Cd36/Cftr/Exph5/Commd1/Hmgn3/Madd/Sirt3/Gnas/Efcab7/Plk3/Capn10/P3h1/Mcu/Anxa1/Bag3/Ier3ip1/Dctn1/P…
BP	GO:0042692	muscle cell differentiation	350	0.323339	1.36865	0.00171746	0.0399855	0.0347312	2244	tags=23%, list=16%, signal=19%	Rarb/Sgcd/Cxcl12/Bhlhe41/Xk/Stac3/Trip10/Rpl3l/Zfp418/Bin1/Synpo2l/Prox1/Npnt/Adprhl1/Xbp1/Hey2/Efemp2/Acvr1/Tmod1/Igf2/Tbx2/Myof/Sgcb/Camk1/Camk2d/Asb2/Ppif/Six1/Naglu/Notch1/Map2k4/Tbx3/Msx1/Wfikkn1/Adm/Dll1/Cfh/Notch2/Myom1/Mrtfa/Dmpk/Smarcd3/Vangl2/Sox6/Tnnt1/Smo/Dner/Tgfb1/Tpm1/Myh6/Nrap/Myom3/Actn3/Hdac3/Fdps/Mybpc2/Trim72/Bhlha15/Krt8/Trim32/Flii/AW551984/Akap6/Gata6/Ank2/Pak1/Comp/Rara/Fg…
BP	GO:0061061	muscle structure development	562	0.323688	1.41828	3.32485e-05	0.00535199	0.00464871	2253	tags=22%, list=16%, signal=19%	Zbtb42/Myl6b/Gsc/Eomes/Rarb/Sgcd/Pkp2/Ranbp3l/Angpt1/Cxcl12/Bhlhe41/Xk/Stac3/Trip10/Rpl3l/Zfp418/Nfix/Bin1/Sox4/Synpo2l/Prox1/Npnt/Adprhl1/Xbp1/Hey2/Efemp2/Mbnl1/Acvr1/Ark2c/Tmod1/Igf2/Tbx2/Myof/Sgcb/Camk1/Camk2d/Dsp/Sox11/Pdlim3/Asb2/Btg2/Foxc2/Ppif/Chrnd/Six1/Mtm1/Naglu/Notch1/Map2k4/Tbx3/Msx1/Lrp2/Wfikkn1/Adm/Dll1/Cfh/Notch2/Myom1/Mrtfa/Tnni3/Lama5/Dmpk/Smarcd3/Vangl2/Sox6/Tnnt1/Smo/Dner/Tgfb1…
BP	GO:0044283	small molecule biosynthetic process	431	0.32762	1.41264	0.000570607	0.0219352	0.0190528	2411	tags=24%, list=17%, signal=20%	Lta4h/Eno2/Itpkb/Pla2g5/Ptges/Pla2g10/Prkag2/Dkkl1/Ip6k2/Acsf3/Gstp1/Ptafr/Elovl7/Carns1/Acss1/Pltp/Cd74/Tpk1/Prox1/Hnf1a/Tha1/Amacr/Apob/Ldhc/Adck2/Slc25a13/Cyp19a1/Cbs/Elovl1/C1qtnf12/Aldoc/Slc19a2/Acsm2/Mri1/Ggt1/Got1l1/Pfkfb1/3110082I17Rik/Fabp5/Hmgcll1/Pts/Pnpo/Gpt/Ada/Apoc1/Abat/Abhd3/Sirt5/Fdps/Shmt2/Acsm3/Rfk/Trib3/Gsto1/Ptgs2/Scd1/Cftr/Plod3/Abcg4/Slc35b4/Sphk1/Elovl2/Ntsr1/Ass1/Acsbg2/G…
BP	GO:0001501	skeletal system development	396	0.330859	1.41799	0.000643613	0.0236421	0.0205354	2354	tags=27%, list=17%, signal=23%	Gsc/Prkra/Rarb/Epha2/Chrdl2/Ranbp3l/Lrrk1/Spef2/Chrd/Ccn2/Ttc9/Dchs1/Nfix/Trappc2/Mdk/Men1/Col5a2/Pbxip1/Timp3/Ift80/Gli2/Megf8/Gpld1/Tgm2/Zbtb16/Cbs/Sox11/Uncx/Foxc2/Ccdc154/Pcsk5/Il17f/Six1/Sh3pxd2b/Fbn2/Adamts7/Pbx1/Hoxb4/Tbx3/Msx1/Wfikkn1/Cfh/Enpp1/Notch2/Hoxd8/Bgn/Lama5/Runx1/Wnt11/Sox6/Dlx3/Slc35d1/Tgfb1/Smad7/Col2a1/Hoxa7/Gata3/Frem1/Ror2/Actn3/Loxl2/Map2k6/Acd/Mmp9/Plekha1/Prkg2/B3glct/Lg…
BP	GO:0002009	morphogenesis of an epithelium	456	0.331038	1.4237	0.0001882	0.0119652	0.0103929	2393	tags=25%, list=17%, signal=21%	Hesx1/Sox2/Cthrc1/Pla2g10/Epha2/Angpt1/Cxcl12/Dchs1/Ntn4/Mdk/Sall1/Prox1/Lmo4/Npnt/Grhl3/Etv4/Sdc4/Nrp1/Krt12/Gli2/Megf8/Acvr1/Casp8/Tbx2/Tgm2/Tbx6/Ift122/Msn/Sox11/Asb2/Foxc2/Irx2/Col4a1/Egfr/Six1/Lcn2/Naglu/Notch1/Pbx1/Hoxb4/Tbx3/Lrp2/Adm/Dll1/Enpp1/Notch2/Ntn1/Rgma/Irx1/Phldb2/Mrtfa/Lama5/Runx1/Vangl2/Ahi1/Wnt11/Igf1r/Dlx3/Smo/Tgfb1/Krt28/Rasip1/Plet1/Col5a1/Gata3/Tek/Klf4/Greb1l/Pcdh15/Perp/S…
BP	GO:0048598	embryonic morphogenesis	519	0.332547	1.451	3.63264e-05	0.00535199	0.00464871	2393	tags=24%, list=17%, signal=21%	Gsc/Eomes/Hesx1/Sox2/Cthrc1/Prkra/Atp8a2/Macroh2a1/Rarb/Epha2/Kcnq4/Chrd/Phldb1/Tbc1d32/Sall1/Men1/Prox1/Hnf1a/Lmo4/Col5a2/Grhl3/Sdc4/Ankrd24/Map2k5/Gli2/Exoc4/Megf8/Mbnl1/Acvr1/Casp8/Igf2/Tbx2/Tbx6/Zbtb16/Ift122/Sox11/Asb2/Pbx2/Foxc2/Irx2/Six1/Fbn2/Naglu/Notch1/Pbx1/Hoxb4/Tbx3/Msx1/Lhfpl5/Lrp2/Ephb2/Adm/Dll1/Enpp1/Notch2/Hsbp1/Ntn1/Rgma/Irx1/Phldb2/Lama5/Vangl2/Wnt11/Txnrd1/Smo/Tgfb1/Ptprq/Tenm4…
BP	GO:0007507	heart development	532	0.335628	1.46508	1.60413e-05	0.00294624	0.0025591	2410	tags=25%, list=17%, signal=22%	Eomes/Rarb/Sgcd/Pkp2/Angpt1/Emp2/Chrd/Trip10/Tbc1d32/Dchs1/Zfp418/Nfix/Sall1/Sox4/Synpo2l/Prox1/Lmo4/Adprhl1/Nrp1/Hey2/Map2k5/Gli2/Megf8/Trp73/Adamts6/Acvr1/Casp8/Tbx2/Sgcb/Tbx6/Camk2d/Ift122/Dsp/Sox11/Pdlim3/Asb2/Foxc2/Pcsk5/Gng5/Egfr/Six1/Sh3pxd2b/Id1/Naglu/Notch1/Map2k4/Tbx3/Sox18/Msx1/Traf3ip2/Lrp2/Adm/Dll1/Enpp1/Notch2/Insr/Slc22a5/Tnni3/Vegfb/Smarcd3/Vangl2/Wnt11/Sox6/Fes/Smo/Tgfb1/Kcnk2/Tp…
BP	GO:0060562	epithelial tube morphogenesis	312	0.338914	1.4268	0.00122638	0.0339076	0.029452	2042	tags=21%, list=14%, signal=19%	Hesx1/Sox2/Cthrc1/Epha2/Angpt1/Cxcl12/Dchs1/Mdk/Sall1/Lmo4/Npnt/Grhl3/Etv4/Sdc4/Nrp1/Gli2/Megf8/Acvr1/Casp8/Tbx2/Tbx6/Ift122/Asb2/Foxc2/Irx2/Col4a1/Six1/Lcn2/Notch1/Pbx1/Tbx3/Lrp2/Adm/Dll1/Notch2/Ntn1/Rgma/Irx1/Lama5/Vangl2/Wnt11/Smo/Tgfb1/Rasip1/Gata3/Tek/Greb1l/Perp/St14/Sox8/Tead2/Sec24b/Rhob/Kif26b/Tmem67/Pak1/Shank3/Plxnd1/Ext1/Ppp3r1/Med12/Maged1/Rara/Fgfr2/Rnf207/Zic3/Foxp1
BP	GO:1904951	positive regulation of establishment of protein localization	285	0.340237	1.41773	0.00228006	0.0489474	0.0425155	2770	tags=24%, list=19%, signal=19%	Kcnn4/Vamp2/Sri/Nlgn2/Sox4/Pmaip1/Hnf1a/Xbp1/Gpld1/Camk1/Apbb3/Trpa1/C1qtnf12/Golph3l/Egfr/F2/Lrp2/Sybu/Gipr/Cacnb3/Myom1/Arhgef5/Ffar2/Smo/Tgfb1/Pfkm/Stx4a/Orai1/Tek/Abat/Tmem30b/Hdac3/Akap5/Ptgs2/Cftr/Exph5/Commd1/Sirt3/Gnas/Efcab7/Pak1/Plk3/Capn10/Mff/Mcu/Akt2/Bag3/Ier3ip1/Dctn1/Pdcd10/Wls/Fis1/Bbc3/Nkx6-1/Vamp8/Cep290/Gsk3a/Tcf7l2/Tgfb3/Myh10/Kif3a/Pgrmc1/Ptpn22/Hsp90aa1/Mtcl1/Hspa1l/Adam9
BP	GO:0048729	tissue morphogenesis	531	0.341498	1.49196	9.90343e-06	0.0028313	0.00245926	2393	tags=25%, list=17%, signal=22%	Eomes/Hesx1/Sox2/Cthrc1/Pla2g10/Epha2/Pkp2/Angpt1/Chrd/Cxcl12/Dchs1/Ntn4/Mdk/Sall1/Prox1/Hnf1a/Lmo4/Npnt/Grhl3/Etv4/Sdc4/Nrp1/Hey2/Efemp2/Krt12/Gli2/Exoc4/Megf8/Acvr1/Casp8/Tbx2/Tgm2/Tbx6/Ift122/Msn/Dsp/Sox11/Asb2/Tcf7l1/Foxc2/Irx2/Col4a1/Egfr/Six1/Lcn2/Naglu/Notch1/Pbx1/Hoxb4/Tbx3/Msx1/Lrp2/Adm/Dll1/Enpp1/Notch2/Ntn1/Rgma/Irx1/Phldb2/Mrtfa/Tnni3/Lama5/Runx1/Vangl2/Ahi1/Wnt11/Igf1r/Dlx3/Txnrd1/Sm…
BP	GO:0048568	embryonic organ development	402	0.344651	1.47945	5.70549e-05	0.00589449	0.00511993	2737	tags=28%, list=19%, signal=23%	Gsc/Eomes/Hesx1/Sox2/Cthrc1/Prkra/Atp8a2/Rarb/Epha2/Kcnq4/Chrd/Cdx2/Sall1/Men1/Prox1/Grhl3/Ankrd24/Hey2/E2f7/Gli2/Megf8/Acvr1/Igf2/Tbx2/Tbx6/Ift122/Sox11/Asb2/Pbx2/Foxc2/Pcsk5/Egfr/Six1/Fbn2/Naglu/Notch1/Pbx1/Hoxb4/Tbx3/Sox18/Msx1/Lhfpl5/Ephb2/Adm/Dll1/Enpp1/Notch2/Ntn1/Runx1/Vangl2/Wnt11/Smo/Tgfb1/Ptprq/Slc44a4/Col2a1/Ada/Ttbk2/Hoxa7/Gata3/Ece1/Id3/Otx1/Pcdh15/St14/Ror2/Krt8/Tead2/Sec24b/Epas1/F…
BP	GO:0060537	muscle tissue development	363	0.351323	1.48787	8.21613e-05	0.00679063	0.00589831	2149	tags=23%, list=15%, signal=20%	Myl6b/Eomes/Rarb/Sgcd/Pkp2/Angpt1/Xk/Stac3/Trip10/Rpl3l/Zfp418/Nfix/Prox1/Adprhl1/Hey2/Efemp2/Trp73/Mbnl1/Acvr1/Casp8/Igf2/Tbx2/Sgcb/Camk2d/Dsp/Sox11/Asb2/Btg2/Foxc2/Ppif/Chrnd/Six1/Mtm1/Eya2/Naglu/Notch1/Map2k4/Tbx3/Lrp2/Dll1/Myom1/Tnni3/Sox6/Fes/Smo/Dner/Tgfb1/Kcnk2/Tpm1/Myh6/Tenm4/Smad7/Nrap/Hdac7/Actn3/Hdac3/Fdps/Sox8/Foxp2/Zfp689/Nras/Bcl9l/Hoxd9/Dipk2a/AW551984/Akap6/Gata6/Zfpm1/Npr2/Pak1/S…
BP	GO:0060485	mesenchyme development	249	0.358085	1.47938	0.000694388	0.024432	0.0212215	2735	tags=28%, list=19%, signal=23%	Gsc/Eomes/Sema3d/Ranbp3l/Emp2/Sema4b/Chrd/Phldb1/Trip10/Dchs1/Mdk/Sema3f/Sox4/Hnf1a/Nrp1/Hey2/Timp3/Exoc4/Acvr1/Tbx2/Foxc2/Glipr2/Efnb1/Six1/Notch1/Tbx3/Msx1/Phldb2/Lama5/Vangl2/Wnt11/Fbxl17/Smo/Tgfb1/Smad7/Gata3/Adam8/Adam15/Loxl2/Sox8/Olfm1/Tead2/Bcl9l/Sema4g/Fam83d/Sema6a/Mapk3/Ext1/Ppp3r1/Sema5b/Has2/Fgfr2/Zic3/Six2/Fermt2/Rflnb/Efna1/Rxra/Cul7/Tcf7l2/Sfrp1/Hmga2/Tgfb3/Tcf15/Aplf/Snai1/Plaur/…
BP	GO:0051222	positive regulation of protein transport	233	0.358582	1.46816	0.00109964	0.031914	0.0277204	2679	tags=24%, list=19%, signal=20%	Kcnn4/Vamp2/Sri/Nlgn2/Sox4/Hnf1a/Xbp1/Gpld1/Camk1/Apbb3/Trpa1/C1qtnf12/Golph3l/Egfr/F2/Lrp2/Sybu/Gipr/Myom1/Arhgef5/Ffar2/Smo/Tgfb1/Pfkm/Stx4a/Orai1/Tek/Abat/Tmem30b/Hdac3/Akap5/Ptgs2/Cftr/Exph5/Commd1/Sirt3/Gnas/Efcab7/Plk3/Capn10/Mcu/Bag3/Ier3ip1/Dctn1/Pdcd10/Wls/Nkx6-1/Vamp8/Cep290/Tcf7l2/Tgfb3/Myh10/Kif3a/Pgrmc1/Ptpn22/Hsp90aa1
BP	GO:0007517	muscle organ development	264	0.365627	1.51508	0.000340729	0.0167633	0.0145605	2143	tags=24%, list=15%, signal=21%	Zbtb42/Myl6b/Gsc/Eomes/Pkp2/Angpt1/Xk/Stac3/Rpl3l/Nfix/Prox1/Xbp1/Hey2/Efemp2/Mbnl1/Igf2/Sgcb/Dsp/Sox11/Asb2/Btg2/Foxc2/Ppif/Chrnd/Six1/Mtm1/Naglu/Notch1/Msx1/Lrp2/Dll1/Myom1/Tnni3/Lama5/Vangl2/Smo/Dner/Tgfb1/Tpm1/Myh6/Smad7/Hdac7/Id3/Actn3/Sox8/Trim72/Foxp2/Fzd2/Zfp689/Ass1/Nras/Bcl9l/Hoxd9/Zfpm1/Sirt2/Nr4a1/Fgfr2/Tmem182/Vrk3/Ero1a/Foxp1/Pitx1/Jph1/Zfpm2
BP	GO:0014706	striated muscle tissue development	344	0.380278	1.60204	3.12504e-06	0.00258284	0.00224345	2149	tags=24%, list=15%, signal=20%	Myl6b/Eomes/Rarb/Sgcd/Pkp2/Angpt1/Xk/Stac3/Trip10/Rpl3l/Zfp418/Nfix/Prox1/Adprhl1/Hey2/Trp73/Mbnl1/Acvr1/Casp8/Igf2/Tbx2/Sgcb/Camk2d/Dsp/Sox11/Asb2/Btg2/Foxc2/Ppif/Chrnd/Six1/Mtm1/Eya2/Naglu/Notch1/Map2k4/Tbx3/Lrp2/Dll1/Myom1/Tnni3/Sox6/Fes/Smo/Dner/Tgfb1/Kcnk2/Tpm1/Myh6/Tenm4/Smad7/Nrap/Hdac7/Actn3/Hdac3/Fdps/Sox8/Foxp2/Zfp689/Nras/Bcl9l/Hoxd9/Dipk2a/AW551984/Akap6/Gata6/Zfpm1/Pak1/Sirt2/Nr4a1/R…
BP	GO:0043583	ear development	193	0.383108	1.54407	0.000372892	0.0171219	0.014872	2778	tags=33%, list=20%, signal=27%	Gsc/Hesx1/Sox2/Cthrc1/Prkra/Atp8a2/Kcnq4/Dchs1/Nfix/Prox1/Grhl3/Sdc4/Ankrd24/Hey2/Gli2/Tbx2/Six1/Cebpd/Naglu/Notch1/Tbx3/Msx1/Lhfpl5/Ephb2/Dll1/Enpp1/Ntn1/Vangl2/Tgfb1/Kcnk2/Ptprq/Slc44a4/Col2a1/Gata3/Ece1/Otx1/Pcdh15/Ror2/Adgrv1/Sec24b/Fzd2/Triobp/H2-DMa/Bmper/Mapk3/Otx2/Fgfr2/Zic3/Psap/Six2/Esrrb/Insig1/Rpgrip1l/Gas1/Cep290/Fzd3/Dvl3/Tcf15/Kif3a/Cux1/Stra6/Whrn/Fgfr1/Atg4b
BP	GO:0048762	mesenchymal cell differentiation	204	0.390332	1.58107	0.000344994	0.0167633	0.0145605	2735	tags=30%, list=19%, signal=25%	Gsc/Eomes/Sema3d/Ranbp3l/Emp2/Sema4b/Chrd/Phldb1/Trip10/Mdk/Sema3f/Nrp1/Hey2/Timp3/Acvr1/Foxc2/Glipr2/Efnb1/Six1/Notch1/Tbx3/Msx1/Phldb2/Lama5/Vangl2/Wnt11/Fbxl17/Smo/Tgfb1/Smad7/Gata3/Adam8/Adam15/Loxl2/Sox8/Olfm1/Bcl9l/Sema4g/Fam83d/Sema6a/Mapk3/Ext1/Ppp3r1/Sema5b/Has2/Fgfr2/Six2/Fermt2/Rflnb/Efna1/Cul7/Tcf7l2/Sfrp1/Hmga2/Tgfb3/Aplf/Snai1/Plaur/Phactr4/Fgfr1/Rgcc
BP	GO:0045165	cell fate commitment	207	0.391318	1.5855	0.000180615	0.0119422	0.010373	2518	tags=31%, list=18%, signal=26%	Bcl11b/Gsc/Nkx2-3/Eomes/Sox2/Dbx1/Chrd/Nfix/Men1/Prox1/Lmo4/Tlx3/Dhh/Hey2/Onecut2/Notch3/Gli2/Acvr1/Tbx2/Glis1/Tbx6/Foxc2/Onecut1/Epop/Six1/Sh3pxd2b/Notch1/Tbx3/Sox18/Dll1/Notch2/Runx1/Wnt11/Sox6/Smo/Tgfb1/Tenm4/Gata3/Tox/Ror2/Sox8/Bhlha15/Nanog/Epas1/AW551984/Gata6/Ext1/Isl2/Otx2/Rara/Casz1/Fgfr2/Sox13/Pitx1/Nfia/Six2/Dock7/Stat6/Gas1/Pml/Fgf13/Tbr1/Tcf7l2/Sfrp1/Tbx4
BP	GO:0048738	cardiac muscle tissue development	204	0.39142	1.58547	0.000327887	0.0167633	0.0145605	2246	tags=25%, list=16%, signal=22%	Rarb/Sgcd/Pkp2/Angpt1/Trip10/Zfp418/Prox1/Adprhl1/Hey2/Trp73/Acvr1/Casp8/Tbx2/Sgcb/Camk2d/Dsp/Asb2/Foxc2/Naglu/Notch1/Map2k4/Tbx3/Lrp2/Dll1/Tnni3/Sox6/Fes/Tgfb1/Kcnk2/Tpm1/Myh6/Tenm4/Smad7/Nrap/Hdac3/Fdps/Dipk2a/AW551984/Akap6/Gata6/Zfpm1/Pak1/Rara/Fgfr2/Zic3/Foxp1/Slc25a4/Fadd/Zfpm2/Arrb2/Nprl3/Ryr2
BP	GO:0003007	heart morphogenesis	218	0.395962	1.6101	9.14765e-05	0.0069853	0.00606741	2020	tags=26%, list=14%, signal=23%	Pkp2/Angpt1/Emp2/Dchs1/Sox4/Synpo2l/Prox1/Adprhl1/Nrp1/Hey2/Megf8/Acvr1/Tbx2/Tbx6/Dsp/Sox11/Asb2/Foxc2/Gng5/Six1/Naglu/Notch1/Tbx3/Msx1/Lrp2/Dll1/Notch2/Insr/Tnni3/Smarcd3/Vangl2/Wnt11/Smo/Tgfb1/Tpm1/Myh6/Smad7/Ephb4/Col2a1/Col5a1/Gata3/Tek/Adam15/Ncor2/Olfm1/Tead2/Sec24b/Fzd2/Gata6/Zfpm1/Cpe/Plxnd1/Ext1/Has2/Fgfr2/Rnf207/Zic3
BP	GO:0055001	muscle cell development	167	0.399038	1.57314	0.000847459	0.0276926	0.0240537	2674	tags=32%, list=19%, signal=26%	Sgcd/Xk/Stac3/Trip10/Zfp418/Bin1/Synpo2l/Prox1/Adprhl1/Hey2/Efemp2/Tmod1/Myof/Sgcb/Camk2d/Asb2/Six1/Naglu/Notch1/Map2k4/Tbx3/Wfikkn1/Adm/Myom1/Tnnt1/Smo/Dner/Tpm1/Myh6/Nrap/Myom3/Actn3/Fdps/Mybpc2/Krt8/Flii/Akap6/Ank2/Pak1/Comp/Tmem182/Foxp1/Slc25a4/Actn1/Flnc/Actn4/Myl9/Gsk3a/Wdr1/Myh10/Pin1/Sorbs2/Dmd
BP	GO:0048592	eye morphogenesis	135	0.40764	1.56218	0.00195041	0.0441647	0.0383613	2373	tags=32%, list=17%, signal=27%	Sox2/Atp8a2/Rarb/Epha2/Tdrd7/Rp1/Sox4/Prox1/Dio3/Col5a2/Grk1/Tbx2/Ift122/Sox11/Fbn2/Naglu/Notch1/Ephb2/Arl6/Dll1/Cfh/Notch2/Impg2/Ahi1/Prom1/Ntrk2/Nectin1/Col5a1/Sdk1/Sox8/Sdk2/Megf11/Pou2f1/Samd11/Otx2/Casz1/Slc1a1/Mfap2/Samd7/Rpgrip1l/Gas1/Lhx1/Cep290
BP	GO:0097485	neuron projection guidance	191	0.408298	1.64019	0.000101235	0.00727573	0.00631968	2422	tags=31%, list=17%, signal=26%	Bcl11b/Sema3d/Pla2g10/Sema4b/Cxcl12/Efnb3/Ntn4/Sema3f/Kif5a/Lmo4/Klf7/Etv4/Ephb6/Nrp1/Notch3/Gli2/Megf8/Rpl24/Ark2c/Efnb1/Notch1/Prtg/Lrp2/Ephb2/Ntn1/Ptpro/Lama5/Gfra3/Vangl2/Smo/Celsr3/Nectin1/Gata3/Ece1/Efna5/Cyfip2/Flrt3/Matn2/Sema4g/Sema6a/Dpysl5/Ext1/Sema5b/Isl2/Cdk5r2/Otx2/Rtn4rl1/Trio/Foxp1/Diaph2/Ryk/Gas1/Chn1/Flrt2/Efna1/Enah/Lhx1/Fzd3/Tbr1/Epha6
BP	GO:0048863	stem cell differentiation	214	0.408629	1.66248	6.24708e-05	0.00600702	0.00521767	2020	tags=21%, list=14%, signal=18%	Gsc/Eomes/Hesx1/Sox2/Sema3d/Sema4b/Cdx2/Sema3f/Men1/Etv4/Nrp1/Cdk6/Ift80/Acvr1/Tbx2/Tcf7l1/Foxc2/Efnb1/Epop/Six1/Notch1/Hoxb4/Tbx3/Ggt1/Sox18/Msx1/Lama5/Sox6/Fbxl17/Smo/Hoxa7/Phf19/Nfe2l2/Sox8/Nanog/Tead2/Nudt21/Sema4g/Gata6/Sema6a/Mapk3/Ext1/Sema5b/Fgfr2/Zic3
BP	GO:0003015	heart process	155	0.409001	1.5952	0.000758405	0.0258882	0.0224864	2390	tags=32%, list=17%, signal=27%	Cacna1e/Atp2a1/Sgcd/Pkp2/Cacna1g/Ccn2/Sri/Bin1/Hey2/Kcne1/Tbx2/Myl4/Camk2d/Dsp/Kcnd3/Kcnh2/Adm/Tnni3/Vegfb/Dmpk/Adm2/Smtn/Tpm1/Myh6/Smad7/Dsc2/Fkbp1b/Ada/Map2k6/Nos1ap/Epas1/Zfas1/Myh7b/Akap6/Gata6/Tmem65/Ank2/Atp2b4/Pde4d/Thra/Ext1/Atp1a3/Slc1a1/Rnf207/Cacna2d1/Map2k3/Ryr2/P2rx4/Fgf13/Gsk3a
BP	GO:0007411	axon guidance	190	0.409427	1.64435	0.000196323	0.0120193	0.0104399	2422	tags=32%, list=17%, signal=27%	Bcl11b/Sema3d/Pla2g10/Sema4b/Cxcl12/Efnb3/Ntn4/Sema3f/Kif5a/Lmo4/Klf7/Etv4/Ephb6/Nrp1/Notch3/Gli2/Megf8/Rpl24/Ark2c/Efnb1/Notch1/Prtg/Lrp2/Ephb2/Ntn1/Ptpro/Lama5/Gfra3/Vangl2/Smo/Celsr3/Nectin1/Gata3/Ece1/Efna5/Cyfip2/Flrt3/Matn2/Sema4g/Sema6a/Dpysl5/Ext1/Sema5b/Isl2/Cdk5r2/Otx2/Rtn4rl1/Trio/Foxp1/Diaph2/Ryk/Gas1/Chn1/Flrt2/Efna1/Enah/Lhx1/Fzd3/Tbr1/Epha6
BP	GO:0090596	sensory organ morphogenesis	227	0.417147	1.70451	9.84808e-06	0.0028313	0.00245926	2393	tags=33%, list=17%, signal=28%	Gsc/Hesx1/Sox2/Cthrc1/Prkra/Atp8a2/Rarb/Epha2/Kcnq4/Tdrd7/Rp1/Sox4/Prox1/Dio3/Col5a2/Grhl3/Ankrd24/Grk1/Gli2/Tbx2/Ift122/Sox11/Six1/Fbn2/Naglu/Notch1/Tbx3/Msx1/Lhfpl5/Ephb2/Arl6/Dll1/Cfh/Enpp1/Notch2/Ntn1/Impg2/Vangl2/Ahi1/Prom1/Ptprq/Slc44a4/Ntrk2/Col2a1/Nectin1/Col5a1/Gata3/Sdk1/Otx1/Pcdh15/Ror2/Sox8/Sec24b/Sdk2/Fzd2/Megf11/Triobp/Pou2f1/Samd11/Mapk3/Otx2/Casz1/Slc1a1/Fgfr2/Zic3/Six2/Mfap2/Samd…
BP	GO:0060047	heart contraction	147	0.420758	1.62601	0.000340432	0.0167633	0.0145605	2390	tags=34%, list=17%, signal=29%	Cacna1e/Atp2a1/Sgcd/Pkp2/Cacna1g/Ccn2/Sri/Bin1/Hey2/Kcne1/Tbx2/Myl4/Camk2d/Dsp/Kcnd3/Kcnh2/Adm/Tnni3/Vegfb/Dmpk/Adm2/Smtn/Tpm1/Myh6/Smad7/Dsc2/Fkbp1b/Ada/Map2k6/Nos1ap/Epas1/Zfas1/Myh7b/Akap6/Gata6/Tmem65/Ank2/Atp2b4/Pde4d/Thra/Ext1/Atp1a3/Slc1a1/Rnf207/Cacna2d1/Map2k3/Ryr2/P2rx4/Fgf13/Gsk3a
BP	GO:0002065	columnar/cuboidal epithelial cell differentiation	116	0.425095	1.5876	0.00145754	0.0366113	0.0318004	2042	tags=26%, list=14%, signal=22%	Rarb/Cdx2/Sox4/Men1/Prox1/Xbp1/Cdk6/Ift80/Dmbt1/Sox11/Onecut1/Notch1/Msx1/Dll1/Wnt11/Dlx3/Smo/Tgfb1/Klf4/C1galt1/Bhlha15/Cftr/Gsdmc2/Gata6/Fasn/Ext1/Otx2/Rara/Fgfr2/Foxp1
BP	GO:0048562	embryonic organ morphogenesis	231	0.429727	1.75824	1.55643e-06	0.00257279	0.00223471	2737	tags=34%, list=19%, signal=28%	Gsc/Hesx1/Sox2/Cthrc1/Prkra/Atp8a2/Rarb/Epha2/Kcnq4/Men1/Prox1/Grhl3/Ankrd24/Gli2/Megf8/Acvr1/Tbx2/Tbx6/Ift122/Sox11/Asb2/Foxc2/Six1/Fbn2/Naglu/Notch1/Hoxb4/Tbx3/Msx1/Lhfpl5/Ephb2/Dll1/Enpp1/Notch2/Ntn1/Vangl2/Wnt11/Smo/Ptprq/Slc44a4/Col2a1/Hoxa7/Gata3/Otx1/Pcdh15/Ror2/Tead2/Sec24b/Fzd2/Triobp/Hoxd9/Gnas/Mapk3/Otx2/Med12/Fgfr2/Rnf207/Zic3/Six2/Mfap2/Insig1/Ryr2/Gas1/Hoxb2/Slc39a1/Efna1/Lhx1/Cep29…
BP	GO:0009201	ribonucleoside triphosphate biosynthetic process	106	0.430409	1.59697	0.00147767	0.0366113	0.0318004	4300	tags=49%, list=30%, signal=34%	Antkmt/Hnf1a/Pid1/Ldhc/Slc25a13/Tgfb1/Atp5mf/Sdhc/Atp5f1d/Ldhd/Ndufb4/Ndufs3/Ndufa2/Ndufs5/Ndufb8/Eno1/Ndufa3/Ndufa5/Sdha/Ndufs7/Vcp/Atp5pd/Atp5mg/Ndufb3/Atp5mc1/Aldoa/Nme5/Uck2/Ndufa13/Ndufs2/Nudt2/Atp6v1a/Atp5mc3/Pnp/Atp5pb/Ndufb9/Nme1/Ndufa8/Nme4/Ndufb5/Nme6/Atp5pf/Ndufab1/Atp5f1e/Ndufs1/Ndufs6/Ndufa11/Ndufa12/Parp1/Atp5if1/Atp5me/Ndufa9
BP	GO:0001659	temperature homeostasis	130	0.434003	1.65891	0.000323077	0.0167633	0.0145605	3238	tags=40%, list=23%, signal=31%	Hcrt/Ptges/Zfp423/Gadd45g/Bscl2/Prlr/Adrb3/Zfp516/Foxc2/Id1/Lcn2/Notch1/Cmklr1/Sfxn5/Pwwp2b/Igf1r/Fabp5/Decr1/Abat/Cpt2/Actn3/Hdac3/Map2k6/Grb10/Esrrg/Epas1/Ptgs2/Cd36/Scd1/Ntsr1/Gnas/Thra/Acadvl/Il18r1/Mfap2/Hadh/Dock7/Stat6/Sqstm1/Slc27a1/Cidea/Lpin1/Kdm6b/Napepld/Dync1h1/Elovl3/Tfe3/Sirt6/Alpl/Pemt/Acadl/Flcn
BP	GO:0009206	purine ribonucleoside triphosphate biosynthetic process	101	0.438048	1.61442	0.000942498	0.0299606	0.0260236	4300	tags=50%, list=30%, signal=35%	Antkmt/Hnf1a/Pid1/Ldhc/Slc25a13/Tgfb1/Atp5mf/Sdhc/Atp5f1d/Ldhd/Ndufb4/Ndufs3/Ndufa2/Ndufs5/Ndufb8/Eno1/Ndufa3/Ndufa5/Sdha/Ndufs7/Vcp/Atp5pd/Atp5mg/Ndufb3/Atp5mc1/Aldoa/Nme5/Ndufa13/Ndufs2/Nudt2/Atp6v1a/Atp5mc3/Pnp/Atp5pb/Ndufb9/Nme1/Ndufa8/Nme4/Ndufb5/Nme6/Atp5pf/Ndufab1/Atp5f1e/Ndufs1/Ndufs6/Ndufa11/Ndufa12/Parp1/Atp5if1/Atp5me/Ndufa9
BP	GO:0003205	cardiac chamber development	144	0.443268	1.7151	9.29683e-05	0.0069853	0.00606741	2390	tags=33%, list=17%, signal=27%	Pkp2/Sall1/Sox4/Prox1/Lmo4/Adprhl1/Nrp1/Hey2/Adamts6/Acvr1/Tbx2/Dsp/Sox11/Foxc2/Pcsk5/Naglu/Notch1/Tbx3/Lrp2/Notch2/Tnni3/Smarcd3/Vangl2/Wnt11/Smo/Tgfb1/Kcnk2/Tpm1/Myh6/Smad7/Gata3/Tek/Greb1l/Fzd2/Kif7/Gata6/Tmem65/Ank2/Zfpm1/Cpe/Plxnd1/Fgfr2/Zfpm2/Nprl3/Ryr2/Rxra/Gsk3a
BP	GO:0055007	cardiac muscle cell differentiation	112	0.444948	1.66018	0.000767405	0.0258882	0.0224864	2627	tags=31%, list=18%, signal=26%	Rarb/Sgcd/Trip10/Zfp418/Prox1/Adprhl1/Hey2/Acvr1/Sgcb/Camk2d/Asb2/Naglu/Map2k4/Tbx3/Dll1/Sox6/Tgfb1/Myh6/Nrap/Hdac3/Fdps/AW551984/Akap6/Gata6/Pak1/Rara/Foxp1/Slc25a4/Arrb2/Rxra/Gsk3a/Myh10/Kdm6b/Pin1/Sorbs2
BP	GO:0003231	cardiac ventricle development	108	0.449246	1.67021	0.000394127	0.0176079	0.0152942	2390	tags=32%, list=17%, signal=27%	Pkp2/Sall1/Sox4/Prox1/Lmo4/Hey2/Acvr1/Dsp/Sox11/Foxc2/Naglu/Notch1/Tbx3/Lrp2/Tnni3/Smarcd3/Vangl2/Wnt11/Tgfb1/Kcnk2/Tpm1/Myh6/Smad7/Gata3/Greb1l/Fzd2/Tmem65/Zfpm1/Cpe/Fgfr2/Zfpm2/Nprl3/Ryr2/Rxra/Gsk3a
BP	GO:0035051	cardiocyte differentiation	140	0.450974	1.73308	4.64771e-05	0.00583985	0.00507247	2627	tags=31%, list=18%, signal=25%	Eomes/Rarb/Sgcd/Trip10/Zfp418/Prox1/Adprhl1/Hey2/Acvr1/Tbx2/Sgcb/Camk2d/Asb2/Egfr/Naglu/Notch1/Map2k4/Tbx3/Sox18/Dll1/Vangl2/Sox6/Tgfb1/Myh6/Tenm4/Nrap/Hdac3/Fdps/AW551984/Akap6/Gata6/Pak1/Mapk3/Rara/Foxp1/Slc25a4/Arrb2/Rxra/Gsk3a/Myh10/Kdm6b/Pin1/Sorbs2
BP	GO:0003206	cardiac chamber morphogenesis	103	0.45582	1.69103	0.00035494	0.0167633	0.0145605	1789	tags=30%, list=13%, signal=27%	Pkp2/Sox4/Prox1/Adprhl1/Nrp1/Hey2/Acvr1/Tbx2/Dsp/Sox11/Foxc2/Naglu/Notch1/Tbx3/Lrp2/Notch2/Tnni3/Smarcd3/Vangl2/Wnt11/Smo/Tgfb1/Tpm1/Myh6/Smad7/Gata3/Tek/Fzd2/Gata6/Zfpm1/Cpe
BP	GO:0042471	ear morphogenesis	103	0.490893	1.82115	4.94603e-05	0.00583985	0.00507247	2393	tags=39%, list=17%, signal=33%	Gsc/Hesx1/Sox2/Cthrc1/Prkra/Atp8a2/Kcnq4/Grhl3/Ankrd24/Gli2/Tbx2/Six1/Naglu/Tbx3/Msx1/Lhfpl5/Ephb2/Dll1/Enpp1/Ntn1/Vangl2/Ptprq/Slc44a4/Col2a1/Gata3/Otx1/Pcdh15/Ror2/Sec24b/Fzd2/Triobp/Mapk3/Otx2/Fgfr2/Zic3/Six2/Insig1/Gas1/Cep290/Fzd3
CC	GO:0005930	axoneme	141	-0.417554	-1.52257	0.00146467	0.0366113	0.0318004	2064	tags=28%, list=15%, signal=24%	Dcdc2a/Bbs7/Dnah7b/Dnah9/Rsph4a/Odad3/Dnah12/Dnah7a/Odad4/Ccdc63/Dnah2/Cfap119/Cfap53/Drc1/Arl13b/Hydin/Cfap70/Nme7/Cfap91/Odad1/Lca5l/Spef1/Rsph1/Bbs1/Dync2h1/Sptbn5/Mns1/Cfap43/Saxo1/Rsph9/Cfap44/Cfap69/Dydc1/Pierce2/Dnajb13/Mak/Drc3/Cimip2a/Ift70a1/Dnai4
CC	GO:0097014	ciliary plasm	142	-0.416798	-1.52186	0.00110048	0.031914	0.0277204	2064	tags=28%, list=15%, signal=24%	Dcdc2a/Bbs7/Dnah7b/Dnah9/Rsph4a/Odad3/Dnah12/Dnah7a/Odad4/Ccdc63/Dnah2/Cfap119/Cfap53/Drc1/Arl13b/Hydin/Cfap70/Nme7/Cfap91/Odad1/Lca5l/Spef1/Rsph1/Bbs1/Dync2h1/Sptbn5/Mns1/Cfap43/Saxo1/Rsph9/Cfap44/Cfap69/Dydc1/Pierce2/Dnajb13/Mak/Drc3/Cimip2a/Ift70a1/Dnai4
CC	GO:0031514	motile cilium	213	-0.380753	-1.4675	0.00188181	0.0432032	0.0375261	2019	tags=29%, list=14%, signal=25%	Dnah7b/Atp1b1/Dnah9/Daam1/Spa17/Pkd1/Wdr19/Rsph4a/Dnaaf11/Dnah12/Cabyr/Txndc8/Tacr3/Catsperg1/Dnah7a/Odad4/Mkks/Catsper2/Drc7/Irgc/Pkd2/Pmfbp1/Qrich2/Dnah2/Cfap119/Cfap53/Drc1/Intu/Arl13b/Cfap70/Ttll9/Nme7/Acta2/Cfap91/Oaz3/Spef1/Catsperd/Rsph1/Ace/Bbs1/Dync2h1/Mns1/Cfap43/Slc25a31/Saxo1/Tpgs1/Tmem232/Fbxl13/Rsph9/Cfap44/Fsip2/Cfap69/Akap3/Dydc1/Nphp1/Pierce2/Dnajb13/Mak/Drc3/Cimip2a/Dnai4
MF	GO:0004888	transmembrane signaling receptor activity	369	-0.367335	-1.48501	0.000113276	0.00780191	0.00677671	1905	tags=30%, list=13%, signal=26%	Lepr/Calcrl/Gm5127/Pkd1/Esr1/Il12b/Gfra4/Tm2d1/Gria4/Vmn1r203/Il2rb/Kremen1/Erbb4/Tacr3/Qrfprl/Ros1/Fcamr/Ccr8/Plxnc1/Cd4/Trpv4/Acvrl1/Htr7/Htr5a/Gpr156/Il12rb2/Tas1r1/Plxna3/Grik5/Acvr1b/Cd69/Chrng/Gpr19/Palld/Robo1/Adgra2/Gpr35/Tgfbr3/Grin2d/Epha3/Or1e1c/Ramp3/Musk/Or51v8/Edar/Vmn2r114/Or5p52/Fzd9/Il4ra/Lilra6/B9d1/Tpra1/Unc5d/Adgrl4/Plxna2/Tlr3/Or5d43/Ptger4/Ghr/Galr3/Nptxr/Cd79a/Gpr27/Il17ra/…
MF	GO:0038023	signaling receptor activity	499	-0.341745	-1.41722	0.00045201	0.0182237	0.015829	2013	tags=27%, list=14%, signal=24%	Gabra3/Slc52a2/Robo4/Nlgn1/Or5b106/Il1r1/Colec12/Lepr/Calcrl/Gm5127/Pkd1/Esr1/A530064D06Rik/Il12b/Prnp/Gfra4/Tm2d1/Nr2f6/Gria4/Vmn1r203/Il2rb/Kremen1/Erbb4/Tacr3/Qrfprl/Ros1/Fcamr/Rgmb/Ccr8/Plxnc1/Cd4/Trpv4/Acvrl1/Htr7/Htr5a/Gpr156/Il12rb2/Tas1r1/Chrna10/Plxna3/Grik5/Acvr1b/Cd69/Chrng/Gpr19/Palld/Robo1/Adgra2/Gucy2c/Gpr35/Tgfbr3/Grin2d/Epha3/Or1e1c/Ramp3/Rora/Musk/Or51v8/Paqr3/Edar/Vmn2r114/Nod1/…
MF	GO:0060089	molecular transducer activity	499	-0.341745	-1.41722	0.00045201	0.0182237	0.015829	2013	tags=27%, list=14%, signal=24%	Gabra3/Slc52a2/Robo4/Nlgn1/Or5b106/Il1r1/Colec12/Lepr/Calcrl/Gm5127/Pkd1/Esr1/A530064D06Rik/Il12b/Prnp/Gfra4/Tm2d1/Nr2f6/Gria4/Vmn1r203/Il2rb/Kremen1/Erbb4/Tacr3/Qrfprl/Ros1/Fcamr/Rgmb/Ccr8/Plxnc1/Cd4/Trpv4/Acvrl1/Htr7/Htr5a/Gpr156/Il12rb2/Tas1r1/Chrna10/Plxna3/Grik5/Acvr1b/Cd69/Chrng/Gpr19/Palld/Robo1/Adgra2/Gucy2c/Gpr35/Tgfbr3/Grin2d/Epha3/Or1e1c/Ramp3/Rora/Musk/Or51v8/Paqr3/Edar/Vmn2r114/Nod1/…
MF	GO:0031490	chromatin DNA binding	108	0.422349	1.57021	0.0020409	0.0449814	0.0390706	2668	tags=26%, list=19%, signal=21%	Eomes/Sox2/Macroh2a1/Grhl3/Xbp1/Gli2/Foxc2/Notch1/Tox2/Repin1/Klf4/Tox/Hdac3/Hr/Ctcfl/Hmgn3/Thra/Rara/H1f4/Macroh2a2/Actn4/Foxo1/Rxra/Tbr1/Foxo3/Hmga2/Kdm6b/Pou5f1

## Sheet: GO_set_8cWT-set_2cWT_res
Figure 1–figure supplement 2–Source Data 1. Gene Set Enrichment Analysis (GSEA) on Gene ontology (GO). GO term enrichment for DEGs identified in the four pairwise comparisons by gseGO in R package ClusterProfiler (v4.14.4).
ONTOLOGY	ID	Description	setSize	enrichmentScore	NES	pvalue	p.adjust	qvalue	rank	leading_edge	core_enrichment
BP	GO:0060041	retina development in camera-type eye	146	-0.375239	-1.51884	0.00260316	0.045039	0.0403095	2985	tags=35%, list=21%, signal=28%	Dio3/Cdon/Zfp513/Large1/Fat3/Rd3/Hif1a/Dscam/Man2a1/Pax2/Ttc8/Nphp4/Dram2/Grk1/Tub/Hipk2/Crb1/Fzd4/Nrp1/Samd7/Thy1/Tgfb2/Nectin3/Nr2e1/Impg2/Acvrl1/Lhx1/Tmem135/Mdm1/Slc4a5/Gnat2/Sox8/Prdm1/Vsx2/Fos/Ahi1/Lamc3/Gpm6a/Dlx2/Dll1/Nr2e3/Pdgfb/Bbs1/Mfrp/Hpca/Mfsd2a/Tfap2b/Thrb/Rom1/Nphp1/Lhx2
BP	GO:0007186	G protein-coupled receptor signaling pathway	402	-0.328784	-1.48572	0.000355249	0.00978648	0.00875881	2928	tags=32%, list=21%, signal=26%	Robo1/Esr1/Chrm3/Cmklr2/Klf16/Dgke/Nmu/Pld2/Iqgap2/Gpr68/Foxc1/Fam114a1/Bcar3/Hif1a/Abl2/Mgll/Mfsd2b/Slit2/Prkar1b/Adcyap1r1/Fzd9/Ece1/Adgrg5/Bcar1/Gabbr1/Fyn/Gnaz/Grk1/Or10al2/Rgs2/Mrap/Qrfprl/Tub/Or51v8/Or2t29/Adm2/Src/Sort1/Gng12/Rgs12/Fzd4/Nherf1/Plce1/Or1ab2/Gpr158/Jak2/Tpra1/Dgkh/Grm2/Grk4/Nlrp6/Ccl25/Adgre4/Adgrl4/Adcy8/Pde4a/Prkd1/Pde10a/Prkaca/Gpr180/Gna12/Fzd8/Tmod2/Adcy5/Rapgef4/Entpd1…
BP	GO:0050877	nervous system process	762	-0.281438	-1.32163	0.0011198	0.0243998	0.0218376	3135	tags=29%, list=22%, signal=24%	Taco1/Ube3a/Alg10b/Dnah9/Ift20/Trpa1/Chrna10/Unc13b/Prkn/Pde1b/Grin2d/Igsf11/Btg2/Homer1/Slc12a5/Ndrg4/Dlg4/Eea1/Tpp1/Chrm3/Atad1/Rbfox2/Shroom4/Pias1/Large1/Atxn1l/Nmu/Lmx1a/Vps13a/Tppp/Nf1/Cnga2/Cd36/Rd3/Kcnab2/Hif1a/Abl2/Mgll/Chrne/Rcsd1/Tmc7/Tfap2a/Ppt1/Prkar1b/Fzd9/C1ql1/Ttc8/Lhx8/Fyn/Pclo/Dram2/Grk1/Myo3a/Cnga1/Grik5/Or10al2/Cdc14a/Pde8b/Daw1/Igsf9b/Nherf2/Loxhd1/Ntrk1/Npas3/Tub/Cacna1i/Nav…
BP	GO:0061061	muscle structure development	566	0.253163	1.25805	0.00198468	0.036298	0.0324864	3025	tags=29%, list=21%, signal=23%	Gsc/Tcf23/Mybpc2/Wnt10b/Pitx1/Fgf3/Nid1/Myl6b/Camk2d/Id3/Camk1/Ass1/Nr4a1/Xkr8/Tmod1/Cntfr/Tnnt1/Foxc2/Rarb/Mtln/Bhlha15/Sirt2/Ranbp3l/Ramp2/Igf1/Csrp1/Myh6/Cxcl12/Adm/Nrap/Xk/Eng/Cd81/Myof/Smyd1/Zfp418/Gata6/Wnt4/Speg/Selenon/Mapk12/Des/Mbnl3/Epas1/Efemp2/Ccnd2/Smarcd3/Chrnd/Bin1/Col3a1/Foxp2/Csrp2/Tbx2/C3/Tmsb4x/Gmppa/Krt8/Mef2d/Hand1/Mtm1/Mylk2/Lemd2/Cd9/Cripto/Znhit1/Slc25a4/Slc8a1/Mylpf/Barx…
BP	GO:0007005	mitochondrion organization	433	0.269122	1.31808	0.00181089	0.0344693	0.0308497	2656	tags=24%, list=19%, signal=20%	Bok/Ndufs6/Acaa2/Cox19/Coa3/Atp2a1/Ndufa5/Coa4/Ier3/Bhlha15/Cnp/Pycard/Mapt/Adck1/Igf1/Ndufb4/Cox7a1/Apool/Mmp9/Bak1/Lpin1/Chchd7/Marcks/Selenon/Slc35f6/Tnfsf10/Mtx1/Epas1/Gba1/Cebpa/Ndufa3/Ppm1k/Dhodh/Sfn/Ndufa8/Hsd17b10/Sdhaf4/Coa5/Alkbh7/Mtm1/Dctn6/Slirp/Ndufa12/Slc25a4/Pink1/Ndufs3/Mrpl15/Pdcd5/Slc25a5/Cfh/Eya2/Sharpin/Neurl4/Hk2/Bax/P2rx7/Vdac2/Timm50/Enpp1/Ndufb8/Chchd10/Myh14/Plaur/Ndufb9/…
BP	GO:0030003	intracellular monoatomic cation homeostasis	367	0.269216	1.30454	0.00282225	0.0472085	0.0422512	3149	tags=29%, list=22%, signal=24%	Bok/Slc24a5/Camk2d/Mt4/Commd1/Trpv5/Npy/Cox19/Tgm2/Tmem106b/Cyba/Atp2a1/Micu3/Mtln/Gsto1/Cd19/Tmem64/Tmc6/Slc39a13/Cln3/Ncs1/Xk/Sv2a/Cp/Bak1/Selenon/Slc4a4/Cybrd1/Sri/Hmox1/Slc30a2/Atp2a3/Atp2c2/Plcd1/Slc39a7/Tspoap1/Nubp1/Plcg1/Grn/Steap3/Grin1/Sgk1/Slc35g1/Slc11a1/Lamp1/Trpc6/Wnt5a/Slc8a1/Prkce/Itpr3/Ryr2/Naglu/Bax/Edn3/Cox11/Frrs1/P2rx7/Tmtc4/Cacna1c/Trpc5/Tgfb1/Atp6v0a4/Slc40a1/Cacna1a/Eif3e/…
BP	GO:0019637	organophosphate metabolic process	827	0.272296	1.40588	4.99699e-06	0.000359783	0.000322003	2971	tags=29%, list=21%, signal=24%	Fabp3/G6pc3/Bpnt2/Ndufs6/Fdx1/Acaa2/Prps2/Eno2/Pklr/Serinc2/Atp5mc2/Gfus/Ak8/Itpkb/Mccc2/Cwh43/Pank4/Nudt15/Serinc4/Pnliprp2/Pla2g10/Vnn1/Nme4/Ndufa5/Pde7b/Ier3/Smpdl3a/Cnp/Plpp2/Nadsyn1/Smpd2/Igf1/Plbd1/Abhd3/Ndufb4/Pgls/Hsd17b4/Cln3/Myh6/Suclg1/Guk1/Cbr2/Pgap3/Tpk1/Prkag2/Antkmt/Aldh1l1/Entpd2/Etnk2/Pfkfb2/Acss1/Lpin1/Dnajc19/Mmut/Dguok/Lcat/Gata6/Selenon/Plscr1/Pde4c/Nt5c3/Idh1/Hnf1a/Slc4a4/Al…
BP	GO:0098771	inorganic ion homeostasis	369	0.276667	1.34213	0.00295798	0.0484992	0.0434064	3120	tags=30%, list=22%, signal=24%	Bok/Slc24a5/Camk2d/Mt4/Commd1/Trpv5/Npy/Cox19/Tgm2/Cyba/Atp2a1/Micu3/Mtln/Gsto1/Cd19/Tmem64/Tmc6/Corin/Slc39a13/Cln3/Ncs1/Xk/Sv2a/Cp/Bak1/Selenon/Cybrd1/Sri/Hmox1/Slc30a2/Atp2a3/Atp2c2/Plcd1/Epas1/Slc39a7/Tspoap1/Nubp1/Plcg1/Fgfr3/Steap3/Slc12a4/Grin1/Sgk1/Slc35g1/Slc11a1/Trpc6/Znhit1/Wnt5a/Slc8a1/Prkce/Itpr3/Ryr2/Naglu/Bax/Edn3/Frrs1/P2rx7/Enpp1/Tmtc4/Ank1/Mllt6/Cacna1c/Trpc5/Slc12a7/Tgfb1/Slc40…
BP	GO:0006091	generation of precursor metabolites and energy	410	0.282709	1.38404	0.000420004	0.0105383	0.00943166	3537	tags=33%, list=25%, signal=26%	Ndufs6/Fdx1/Prps2/Eno2/Pklr/Ndufa5/Mtln/Ier3/Igf1/Ndufb4/Cox7a1/Pgls/Ppp1r3f/Suclg1/Prkag2/Antkmt/Aldh1l1/Chchd5/Pfkfb2/Dguok/Selenon/Idh1/Slc4a4/Aldoc/Cxxc5/Sdhc/Gnmt/Phka1/Gba1/Jmjd8/Ndufa3/Hk1/Etfdh/Ndufa8/Sdhaf4/Gaa/Ndufa12/Adgrf5/Pink1/Ndufs3/Cbfa2t3/Hk2/Bax/Nupr1/Tkfc/Cox6c/P2rx7/Enpp1/Sdhb/Ndufb8/Msh2/Chchd10/Gpd2/Cat/Ndufb9/Prkaa2/Ndufb1/1810024B03Rik/Tkt/Ndufv1/Ndufs5/Pdha1/Ppif/Vgf/Aco2…
BP	GO:0043436	oxoacid metabolic process	676	0.290254	1.46319	7.05124e-07	6.86874e-05	6.14746e-05	2948	tags=30%, list=21%, signal=25%	Fabp3/Hadh/Sphk1/Tat/Ndufs6/Lta4h/Nagk/Acaa2/Ahcy/Ass1/Slc7a7/Eno2/Pklr/Appl2/Mccc2/Got1l1/Abcb11/Pla2g10/Vnn1/Mtln/Decr1/Pon3/Ier3/Gsto1/Sirt2/Cyp2s1/Igf1/Abhd3/Gulo/Pcbd2/Rdh1/Hsd17b4/Cln3/Acsf3/Suclg1/Erlin2/Acadl/Tpk1/Prkag2/Aldh1l1/Gadl1/Il4i1/Bhmt/Pfkfb2/Acss1/Lpin1/Cyp7a1/Ptgr1/Nit2/Mmut/Gsto2/Hexa/Selenon/Idh1/Hnf1a/Slc4a4/Aldoc/Fahd2a/Tha1/Cyp4f13/Amacr/Cbs/Gcat/Elovl2/Haghl/Abhd10/Gnmt/…
BP	GO:0006082	organic acid metabolic process	679	0.291989	1.47495	4.72922e-07	5.416e-05	4.84727e-05	2948	tags=30%, list=21%, signal=25%	Fabp3/Hadh/Sphk1/Tat/Ndufs6/Lta4h/Nagk/Acaa2/Stat5b/Ahcy/Ass1/Slc7a7/Eno2/Pklr/Appl2/Mccc2/Got1l1/Abcb11/Pla2g10/Vnn1/Mtln/Decr1/Pon3/Ier3/Gsto1/Sirt2/Cyp2s1/Igf1/Abhd3/Gulo/Pcbd2/Rdh1/Hsd17b4/Cln3/Acsf3/Suclg1/Erlin2/Acadl/Tpk1/Prkag2/Aldh1l1/Gadl1/Il4i1/Bhmt/Pfkfb2/Acss1/Lpin1/Cyp7a1/Ptgr1/Nit2/Mmut/Gsto2/Hexa/Selenon/Idh1/Hnf1a/Slc4a4/Aldoc/Fahd2a/Tha1/Cyp4f13/Amacr/Cbs/Gcat/Elovl2/Haghl/Abhd1…
BP	GO:0019752	carboxylic acid metabolic process	667	0.29383	1.48057	5.54369e-07	5.73772e-05	5.13521e-05	2948	tags=31%, list=21%, signal=25%	Fabp3/Hadh/Sphk1/Tat/Ndufs6/Lta4h/Nagk/Acaa2/Ahcy/Ass1/Slc7a7/Eno2/Pklr/Appl2/Mccc2/Got1l1/Abcb11/Pla2g10/Vnn1/Mtln/Decr1/Pon3/Ier3/Gsto1/Sirt2/Cyp2s1/Igf1/Abhd3/Gulo/Pcbd2/Rdh1/Hsd17b4/Cln3/Acsf3/Suclg1/Erlin2/Acadl/Tpk1/Prkag2/Aldh1l1/Gadl1/Il4i1/Bhmt/Pfkfb2/Acss1/Lpin1/Cyp7a1/Ptgr1/Nit2/Mmut/Gsto2/Hexa/Selenon/Idh1/Hnf1a/Slc4a4/Aldoc/Fahd2a/Tha1/Cyp4f13/Amacr/Cbs/Gcat/Elovl2/Haghl/Abhd10/Gnmt/…
BP	GO:0006753	nucleoside phosphate metabolic process	515	0.298178	1.47187	1.34148e-05	0.000653379	0.000584769	2971	tags=31%, list=21%, signal=26%	Ndufs6/Fdx1/Acaa2/Prps2/Eno2/Pklr/Atp5mc2/Gfus/Ak8/Mccc2/Pank4/Nudt15/Vnn1/Nme4/Ndufa5/Pde7b/Ier3/Smpdl3a/Cnp/Nadsyn1/Igf1/Ndufb4/Pgls/Hsd17b4/Myh6/Suclg1/Guk1/Cbr2/Tpk1/Prkag2/Antkmt/Aldh1l1/Entpd2/Pfkfb2/Acss1/Mmut/Dguok/Selenon/Pde4c/Nt5c3/Idh1/Hnf1a/Slc4a4/Aldoc/Sdhc/Amdhd2/Ncf2/Naprt/Fdxr/Pde7a/Jmjd8/Ndufa3/Dhodh/Elovl3/Hk1/Ndufa8/Gmppa/Adss1/Rnaseh2b/Nt5c/Adal/Ndufa12/Npr2/Ndufs3/Nme2/Cfh/A…
BP	GO:0055086	nucleobase-containing small molecule metabolic process	536	0.302005	1.49365	2.79469e-06	0.000231401	0.000207101	2971	tags=31%, list=21%, signal=26%	Ndufs6/Fdx1/Acaa2/Ahcy/Prps2/Eno2/Pklr/Atp5mc2/Gfus/Ak8/Mccc2/Pank4/Nudt15/Vnn1/Nme4/Ndufa5/Pde7b/Ier3/Smpdl3a/Cnp/Nadsyn1/Igf1/Ndufb4/Pgls/Hsd17b4/Myh6/Suclg1/Guk1/Cbr2/Tpk1/Prkag2/Antkmt/Aldh1l1/Entpd2/Pfkfb2/Acss1/Mmut/Dguok/Selenon/Pde4c/Nt5c3/Idh1/Hnf1a/Slc4a4/Aldoc/Sdhc/Gnmt/Amdhd2/Ncf2/Naprt/Fdxr/Pde7a/Jmjd8/Ndufa3/Dhodh/Elovl3/Hk1/Ndufa8/Macrod1/Gmppa/Adss1/Rnaseh2b/Nt5c/Adal/Ndufa12/Npr2…
BP	GO:1901293	nucleoside phosphate biosynthetic process	261	0.310063	1.45744	0.000700999	0.016123	0.0144299	2971	tags=32%, list=21%, signal=26%	Ndufs6/Prps2/Atp5mc2/Gfus/Ak8/Pank4/Nme4/Ndufa5/Nadsyn1/Ndufb4/Guk1/Tpk1/Antkmt/Acss1/Mmut/Dguok/Hnf1a/Sdhc/Amdhd2/Naprt/Ndufa3/Dhodh/Elovl3/Hk1/Ndufa8/Gmppa/Adss1/Ndufa12/Npr2/Ndufs3/Nme2/Cox11/Adcy1/Sdhb/Ndufb8/Tyms/Tgfb1/Uckl1/Ndufb9/Ndufb1/Pfas/Mthfd1/Ndufv1/Ndufs5/Impdh2/Pdha1/Pmm1/Gnpnat1/Acsl6/Aldoa/Ndufa7/Ndufa11/Ndufb5/Idh2/Dtymk/Atp5me/Ak4/Parp1/Atp6v1a/Dip2a/Pnp2/Nme1/Ndufa13/Atp5po/Ga…
BP	GO:0072521	purine-containing compound metabolic process	452	0.310157	1.52209	5.86991e-06	0.000405023	0.000362492	2971	tags=32%, list=21%, signal=26%	Ndufs6/Fdx1/Acaa2/Ahcy/Prps2/Eno2/Pklr/Atp5mc2/Mccc2/Pank4/Nudt15/Vnn1/Nme4/Ndufa5/Pde7b/Ier3/Nadsyn1/Igf1/Ndufb4/Pgls/Hsd17b4/Myh6/Suclg1/Guk1/Cbr2/Tpk1/Prkag2/Antkmt/Aldh1l1/Pfkfb2/Acss1/Mmut/Dguok/Selenon/Pde4c/Nt5c3/Idh1/Hnf1a/Slc4a4/Aldoc/Sdhc/Gnmt/Ncf2/Naprt/Fdxr/Pde7a/Jmjd8/Ndufa3/Elovl3/Hk1/Ndufa8/Macrod1/Adss1/Nt5c/Adal/Ndufa12/Npr2/Ndufs3/Nme2/Cfh/Acot6/Cbfa2t3/Fhit/Hk2/Cox11/Adcy1/Nupr…
BP	GO:0043062	extracellular structure organization	233	0.310657	1.4427	0.00126216	0.0264574	0.0236791	1737	tags=24%, list=12%, signal=22%	Ccn1/Nid1/Loxl2/Anxa2/Col9a2/Meltf/Foxc2/Col5a2/Ramp2/Adamts14/Aebp1/Eng/Phldb1/Adamts10/Mmp9/Smoc1/Pomt2/Ccn2/Spock2/Selenon/Col18a1/Col4a1/Mfap4/Creb3l1/Ntn4/Efemp2/Hmcn1/Adamts6/Col3a1/P3h4/Adtrp/Hpse2/Pxdn/Fn1/Adamts7/Adamts4/Col23a1/Crispld2/Ric8a/Mmp17/Sh3pxd2b/Col5a1/Postn/Dpp4/Lamb2/Col27a1/Serpinh1/Tie1/Ier3ip1/Phldb2/Fkbp10/Tgfb1/B4galt1/Plod1/Adamts20/Pdgfra/Notch1
BP	GO:0030198	extracellular matrix organization	232	0.311589	1.44298	0.00190367	0.0354211	0.0317015	1737	tags=25%, list=12%, signal=22%	Ccn1/Nid1/Loxl2/Anxa2/Col9a2/Meltf/Foxc2/Col5a2/Ramp2/Adamts14/Aebp1/Eng/Phldb1/Adamts10/Mmp9/Smoc1/Pomt2/Ccn2/Spock2/Selenon/Col18a1/Col4a1/Mfap4/Creb3l1/Ntn4/Efemp2/Hmcn1/Adamts6/Col3a1/P3h4/Adtrp/Hpse2/Pxdn/Fn1/Adamts7/Adamts4/Col23a1/Crispld2/Ric8a/Mmp17/Sh3pxd2b/Col5a1/Postn/Dpp4/Lamb2/Col27a1/Serpinh1/Tie1/Ier3ip1/Phldb2/Fkbp10/Tgfb1/B4galt1/Plod1/Adamts20/Pdgfra/Notch1
BP	GO:0045229	external encapsulating structure organization	232	0.311589	1.44298	0.00190367	0.0354211	0.0317015	1737	tags=25%, list=12%, signal=22%	Ccn1/Nid1/Loxl2/Anxa2/Col9a2/Meltf/Foxc2/Col5a2/Ramp2/Adamts14/Aebp1/Eng/Phldb1/Adamts10/Mmp9/Smoc1/Pomt2/Ccn2/Spock2/Selenon/Col18a1/Col4a1/Mfap4/Creb3l1/Ntn4/Efemp2/Hmcn1/Adamts6/Col3a1/P3h4/Adtrp/Hpse2/Pxdn/Fn1/Adamts7/Adamts4/Col23a1/Crispld2/Ric8a/Mmp17/Sh3pxd2b/Col5a1/Postn/Dpp4/Lamb2/Col27a1/Serpinh1/Tie1/Ier3ip1/Phldb2/Fkbp10/Tgfb1/B4galt1/Plod1/Adamts20/Pdgfra/Notch1
BP	GO:0009117	nucleotide metabolic process	394	0.318313	1.54015	1.22652e-05	0.000621686	0.000556404	2971	tags=34%, list=21%, signal=27%	Ndufs6/Fdx1/Prps2/Eno2/Pklr/Atp5mc2/Ak8/Nudt15/Nme4/Ndufa5/Pde7b/Ier3/Cnp/Nadsyn1/Igf1/Ndufb4/Pgls/Myh6/Guk1/Cbr2/Prkag2/Antkmt/Aldh1l1/Pfkfb2/Dguok/Selenon/Pde4c/Nt5c3/Idh1/Hnf1a/Slc4a4/Aldoc/Sdhc/Ncf2/Naprt/Fdxr/Pde7a/Jmjd8/Ndufa3/Dhodh/Hk1/Ndufa8/Adss1/Rnaseh2b/Nt5c/Adal/Ndufa12/Npr2/Ndufs3/Nme2/Cfh/Cbfa2t3/Fhit/Hk2/Cox11/Adcy1/Nupr1/Tkfc/P2rx7/Naxe/Hspa8/Enpp1/Sdhb/Ndufb8/Tyms/Gpd2/Tgfb1/Uckl…
BP	GO:0016053	organic acid biosynthetic process	224	0.319206	1.47397	0.00135349	0.0273339	0.0244636	2948	tags=33%, list=21%, signal=26%	Sphk1/Lta4h/Ass1/Pklr/Got1l1/Pla2g10/Gsto1/Sirt2/Abhd3/Gulo/Pcbd2/Rdh1/Cln3/Acsf3/Erlin2/Acadl/Prkag2/Bhmt/Acss1/Cyp7a1/Hnf1a/Tha1/Amacr/Cbs/Elovl2/Asns/Pycr2/Prxl2b/Elovl3/Hsd17b10/Apoc1/Tecr/Bhmt1b/Ggt1/Mif/Nags/Abcd3/Gstp1/Prkab2/Ptges2/Mcat/Slc38a1/Prkaa2/Aloxe3/Ptgis/Slc27a2/Cyp27a1/Mthfd1/Bcat1/Mri1/Asnsd1/Ubr4/Oxsm/Mthfd1l/Fgfr4/Dse/Prkab1/Rdh16/Ptgs2/Gamt/Acacb/Acadvl/Ldhc/Phgdh/Slc1a3/Ap…
BP	GO:0019693	ribose phosphate metabolic process	305	0.320606	1.52716	0.000109244	0.00328924	0.00294384	2971	tags=34%, list=21%, signal=28%	Ndufs6/Prps2/Eno2/Pklr/Atp5mc2/Nme4/Ndufa5/Pde7b/Ier3/Igf1/Ndufb4/Myh6/Guk1/Prkag2/Antkmt/Pfkfb2/Selenon/Pde4c/Nt5c3/Hnf1a/Slc4a4/Aldoc/Sdhc/Pde7a/Jmjd8/Ndufa3/Dhodh/Hk1/Ndufa8/Adss1/Rnaseh2b/Nt5c/Ndufa12/Npr2/Ndufs3/Nme2/Cfh/Cbfa2t3/Hk2/Cox11/Adcy1/Nupr1/Tkfc/P2rx7/Hspa8/Enpp1/Sdhb/Ndufb8/Tgfb1/Uckl1/Ndufb9/Prkaa2/Ndufb1/Epha2/Bad/Pfas/Mthfd1/Ndufv1/Ndufs5/Impdh2/Bloc1s6/Fis1/Aldoa/Nudt9/Ndufa7/…
BP	GO:0022613	ribonucleoprotein complex biogenesis	429	0.320774	1.57245	4.41003e-06	0.000347433	0.000310949	4910	tags=45%, list=34%, signal=30%	Rnasel/Prkra/Rpl24/Lsm4/Mpv17l2/Ago4/Gcfc2/Rpl13a/Rpl7/Rpl27/Hsp90ab1/Tsr2/Mcat/Ago1/Eif2s3y/Snrpb/Bud23/Mettl18/Rps6-ps4/Malsu1/Rpl5/Eif3e/Rpl38/Mettl5/Rpl7a/Eif3l/Rps27a/Eif3k/Rps23/Isy1/Rpusd4/Rps24/Rps27/Ago2/Exosc7/Hsp90aa1/Ruvbl2/Rps6/Rps5/Rps16/Rps15a/Exosc4/Rps14/Nle1/Rps11/Nol3/Sf3a3/Mrm2/Rps12/Rps9/Zfp593/Rpl14/Rps15/Efl1/Gemin2/Rpl26/Eif3d/Rpsa/Mcts1/Eri3/Rps25/Aatf/Eif3i/Snrnp200/Rpl3…
BP	GO:0046394	carboxylic acid biosynthetic process	222	0.322532	1.48335	0.001231	0.026135	0.0233906	2948	tags=33%, list=21%, signal=27%	Sphk1/Lta4h/Ass1/Pklr/Got1l1/Pla2g10/Gsto1/Sirt2/Abhd3/Gulo/Pcbd2/Rdh1/Cln3/Acsf3/Erlin2/Acadl/Prkag2/Bhmt/Acss1/Cyp7a1/Hnf1a/Tha1/Amacr/Cbs/Elovl2/Asns/Pycr2/Prxl2b/Elovl3/Hsd17b10/Apoc1/Tecr/Bhmt1b/Ggt1/Mif/Nags/Abcd3/Gstp1/Prkab2/Ptges2/Mcat/Slc38a1/Prkaa2/Aloxe3/Ptgis/Slc27a2/Cyp27a1/Mthfd1/Bcat1/Mri1/Asnsd1/Ubr4/Oxsm/Mthfd1l/Fgfr4/Dse/Prkab1/Rdh16/Ptgs2/Gamt/Acacb/Acadvl/Ldhc/Phgdh/Slc1a3/Ap…
BP	GO:0006163	purine nucleotide metabolic process	346	0.322723	1.54895	1.59789e-05	0.000696343	0.000623221	2971	tags=34%, list=21%, signal=27%	Ndufs6/Fdx1/Prps2/Eno2/Pklr/Atp5mc2/Nudt15/Nme4/Ndufa5/Pde7b/Ier3/Nadsyn1/Igf1/Ndufb4/Pgls/Myh6/Guk1/Cbr2/Prkag2/Antkmt/Aldh1l1/Pfkfb2/Dguok/Selenon/Pde4c/Idh1/Hnf1a/Slc4a4/Aldoc/Sdhc/Ncf2/Naprt/Fdxr/Pde7a/Jmjd8/Ndufa3/Hk1/Ndufa8/Adss1/Nt5c/Ndufa12/Npr2/Ndufs3/Nme2/Cfh/Cbfa2t3/Fhit/Hk2/Cox11/Adcy1/Nupr1/Tkfc/P2rx7/Hspa8/Enpp1/Sdhb/Ndufb8/Gpd2/Tgfb1/Ndufb9/Prkaa2/Ndufb1/Epha2/Bad/Pfas/Mthfd1/Tkt/N…
BP	GO:0006364	rRNA processing	209	0.323851	1.47355	0.00120879	0.0259969	0.023267	5058	tags=45%, list=35%, signal=30%	Rnasel/Rpl7/Rpl27/Tsr2/Bud23/Mettl18/Rps6-ps4/Rpl5/Mettl5/Rpl7a/Rpusd4/Rps24/Rps27/Exosc7/Rps6/Rps16/Exosc4/Rps14/Mrm2/Rpl14/Rps15/Rpl26/Eri3/Rps25/Rpl35a/Rexo5/Rps17/Pop5/Npm1/Rps8/Rps28/Zcchc4/Gar1/Fbl/Rps19/Exosc5/Rpl7l1/Rrp1/Pelp1/Emg1/Wdr46/Rps7/Dhx37/Exosc9/Ftsj3/Ncl/Mrm3/Naf1/Utp18/Rpl11/Nhp2/Bysl/Rps21/Nop53/Nol6/Ddx18/Heatr1/Wdr3/Eri2/Nat10/Ybey/Wdr74/Utp4/Rpl35/Riok3/Sart1/Mettl15/Tsr3/…
BP	GO:0009150	purine ribonucleotide metabolic process	282	0.323916	1.52838	0.000131427	0.00388647	0.00347836	2971	tags=35%, list=21%, signal=28%	Ndufs6/Prps2/Eno2/Pklr/Atp5mc2/Nme4/Ndufa5/Pde7b/Ier3/Igf1/Ndufb4/Myh6/Guk1/Prkag2/Antkmt/Pfkfb2/Selenon/Pde4c/Hnf1a/Slc4a4/Aldoc/Sdhc/Pde7a/Jmjd8/Ndufa3/Hk1/Ndufa8/Adss1/Nt5c/Ndufa12/Npr2/Ndufs3/Nme2/Cfh/Cbfa2t3/Hk2/Cox11/Adcy1/Nupr1/Tkfc/P2rx7/Hspa8/Enpp1/Sdhb/Ndufb8/Tgfb1/Ndufb9/Prkaa2/Ndufb1/Epha2/Bad/Pfas/Mthfd1/Ndufv1/Ndufs5/Impdh2/Bloc1s6/Fis1/Aldoa/Nudt9/Ndufa7/Ndufa11/Ndufb5/Actn3/Atp5me…
BP	GO:0009259	ribonucleotide metabolic process	298	0.327908	1.55966	3.71375e-05	0.00133695	0.00119656	2971	tags=35%, list=21%, signal=28%	Ndufs6/Prps2/Eno2/Pklr/Atp5mc2/Nme4/Ndufa5/Pde7b/Ier3/Igf1/Ndufb4/Myh6/Guk1/Prkag2/Antkmt/Pfkfb2/Selenon/Pde4c/Nt5c3/Hnf1a/Slc4a4/Aldoc/Sdhc/Pde7a/Jmjd8/Ndufa3/Dhodh/Hk1/Ndufa8/Adss1/Rnaseh2b/Nt5c/Ndufa12/Npr2/Ndufs3/Nme2/Cfh/Cbfa2t3/Hk2/Cox11/Adcy1/Nupr1/Tkfc/P2rx7/Hspa8/Enpp1/Sdhb/Ndufb8/Tgfb1/Uckl1/Ndufb9/Prkaa2/Ndufb1/Epha2/Bad/Pfas/Mthfd1/Ndufv1/Ndufs5/Impdh2/Bloc1s6/Fis1/Aldoa/Nudt9/Ndufa7/…
BP	GO:0042254	ribosome biogenesis	306	0.32799	1.56782	4.33658e-05	0.00149612	0.00133901	4910	tags=43%, list=34%, signal=29%	Rnasel/Rpl24/Mpv17l2/Rpl7/Rpl27/Tsr2/Mcat/Bud23/Mettl18/Rps6-ps4/Malsu1/Rpl5/Rpl38/Mettl5/Rpl7a/Rps27a/Rps23/Rpusd4/Rps24/Rps27/Exosc7/Rps6/Rps5/Rps16/Rps15a/Exosc4/Rps14/Nle1/Rps11/Mrm2/Rps12/Rps9/Zfp593/Rpl14/Rps15/Efl1/Rpl26/Rpsa/Eri3/Rps25/Aatf/Rpl35a/Rps3a1/Rexo5/Rps17/Rps13/Pop5/Rps4x/Fau/Npm1/Rps8/Rps28/Rplp0/Zcchc4/Gar1/Fbl/Rps19/Exosc5/Rpl7l1/Nup88/Rrp1/Pelp1/Emg1/Wdr46/Ran/Rps7/Dhx37/Ex…
BP	GO:0006520	amino acid metabolic process	225	0.332671	1.53714	0.000584127	0.0138188	0.0123677	2965	tags=32%, list=21%, signal=26%	Tat/Ahcy/Ass1/Slc7a7/Mccc2/Gatb/Got1l1/Pcbd2/Cln3/Vars1/Il4i1/Bhmt/Nit2/Mmut/Tars3/Tha1/Cbs/Gcat/Gnmt/Acy1/Asns/Pycr2/Ppm1k/Hsd17b10/Amt/Adss1/Spr/Rars2/Bhmt1b/Sars2/Ggt1/Accs/Nags/Pemt/Slc38a1/Pfas/Mthfd1/Bcat1/Bloc1s6/Mri1/Asnsd1/Lars1/Ddah1/Hdc/Gldc/Tdh/Farsa/Aars2/Tars2/Gart/Aspg/Scly/Gamt/Farsb/Hibch/Phgdh/Dbt/Fh1/Slc1a3/Hpd/Apip/Bhmt2/Gfpt2/Yars2/Dio1/Iars2/Tars1/Enoph1/Slc25a12/Carns1/Cad/…
BP	GO:0006412	translation	624	0.333432	1.66678	1.58923e-10	2.92418e-08	2.61711e-08	3296	tags=35%, list=23%, signal=28%	Eef2kmt/Mrpl14/Alkbh3/Mrpl36/Grb7/Dap/Coa3/Mrps18c/Parp16/Gatb/Rpl9-ps6/Igf1/Rpl24/Nhlrc3/Abtb1/Mrpl1/Vars1/Hemk1/Nck2/Rpl6l/Tars3/Mtg1/Mrpl47/Mrps21/Mrps16/Mrpl33/Plxnb2/Eef1g/Mrpl19/Mrpl23/Rars2/Bc1/Sars2/Mpv17l2/Ago4/Chchd1/Mrps31/Rps18/Mrrf/Pink1/Mrpl15/Rpl13a/Rpl3/Cdk4/Eef1b2/Rpl7/Rpl27/Mrpl16/Erbb2/Rpl9/Rack1/Ago1/Eif2s3y/Lrpprc/Tyms/Ddx25/Mrpl22/Mettl18/Rps6-ps4/Ufl1/Aimp1/Rpl12/Rps2/Pstk/…
BP	GO:0072522	purine-containing compound biosynthetic process	206	0.337088	1.52967	0.000517548	0.0126038	0.0112803	2900	tags=33%, list=20%, signal=27%	Ndufs6/Prps2/Atp5mc2/Pank4/Nme4/Ndufa5/Nadsyn1/Ndufb4/Guk1/Tpk1/Antkmt/Acss1/Mmut/Dguok/Hnf1a/Sdhc/Naprt/Ndufa3/Elovl3/Ndufa8/Adss1/Adal/Ndufa12/Npr2/Ndufs3/Nme2/Cox11/Adcy1/Sdhb/Ndufb8/Tgfb1/Ndufb9/Ndufb1/Pfas/Mthfd1/Ndufv1/Ndufs5/Impdh2/Pdha1/Acsl6/Aldoa/Ndufa7/Ndufa11/Ndufb5/Idh2/Atp5me/Ak4/Parp1/Atp6v1a/Dip2a/Pnp2/Nme1/Ndufa13/Atp5po/Gart/Ndufa1/Acacb/Atp5mc1/Impdh1/Ndufs7/Ldhc/Stoml2/Atic/At…
BP	GO:0009165	nucleotide biosynthetic process	192	0.338199	1.53142	0.000847138	0.0187048	0.0167406	2971	tags=34%, list=21%, signal=28%	Ndufs6/Prps2/Atp5mc2/Ak8/Nme4/Ndufa5/Nadsyn1/Ndufb4/Guk1/Antkmt/Dguok/Hnf1a/Sdhc/Naprt/Ndufa3/Dhodh/Ndufa8/Adss1/Ndufa12/Npr2/Ndufs3/Nme2/Cox11/Adcy1/Sdhb/Ndufb8/Tyms/Tgfb1/Uckl1/Ndufb9/Ndufb1/Pfas/Mthfd1/Ndufv1/Ndufs5/Impdh2/Aldoa/Ndufa7/Ndufa11/Ndufb5/Idh2/Dtymk/Atp5me/Ak4/Parp1/Atp6v1a/Pnp2/Nme1/Ndufa13/Atp5po/Gart/Ndufa1/Upp1/Atp5mc1/Impdh1/Ndufs7/Ldhc/Stoml2/Atic/Atp5pf/Slc25a12/Rrm2/Adcy6/N…
BP	GO:0045333	cellular respiration	223	0.33845	1.55987	0.000375773	0.00987747	0.00884025	3854	tags=40%, list=27%, signal=30%	Ndufs6/Ndufa5/Mtln/Ndufb4/Cox7a1/Suclg1/Antkmt/Chchd5/Dguok/Idh1/Sdhc/Gba1/Ndufa3/Etfdh/Ndufa8/Sdhaf4/Ndufa12/Pink1/Ndufs3/Cbfa2t3/Bax/Nupr1/Cox6c/Sdhb/Ndufb8/Msh2/Chchd10/Gpd2/Cat/Ndufb9/Ndufb1/Ndufv1/Ndufs5/Pdha1/Ppif/Aco2/Nr4a3/Mrps36/Ndufa7/Ndufa11/Ndufb5/Idh2/Actn3/Cox7c/Atp5me/Ak4/Ndufa13/Atp5po/Ndufa1/Trpv4/Sucla2/Uqcc2/Mtch2/Uqcrb/Oxa1l/Ndufs7/Stoml2/Fh1/Slc1a3/Idh3b/Atp5pf/Vps54/Slc25a12…
BP	GO:0006399	tRNA metabolic process	184	0.342339	1.54061	0.00129409	0.0267876	0.0239747	4202	tags=37%, list=29%, signal=26%	Trpt1/Wdr6/Gatb/Adat2/Slfn2/Dtd1/Vars1/Rpp25l/Tars3/Pus10/Tyw3/Hsd17b10/Rars2/Sars2/Trmo/Dtwd1/Trmt1/Trmt9b/Dus1l/Trmu/Rpusd4/Lars1/Sepsecs/Exosc7/Tsen34/Ddx1/Farsa/Elp1/Thumpd3/Aars2/Zbtb8os/Tars2/Trp53rkb/Trmt11/Farsb/Trmt44/Bcdin3d/Dus4l/Yars2/Osgep/Ctu2/Iars2/Tars1/Pop5/Alkbh8/Gars1/Mars1/Yars1/Sars1/Wdr4/Mto1/Exosc9/Dtwd2/Trmt1l/Dph3/Elac1/Elac2/Rtcb/Tarbp1/Wars2/Urm1/Nsun2/Trmt10b/Nat10/Elp…
BP	GO:0071826	protein-RNA complex organization	179	0.346755	1.56491	0.000613484	0.0143089	0.0128063	4891	tags=50%, list=34%, signal=33%	Prkra/Rpl24/Lsm4/Ago4/Gcfc2/Rpl13a/Hsp90ab1/Mcat/Ago1/Eif2s3y/Snrpb/Rps6-ps4/Rpl5/Eif3e/Rpl38/Eif3l/Eif3k/Isy1/Rps27/Ago2/Hsp90aa1/Ruvbl2/Rps6/Rps5/Rps14/Nol3/Sf3a3/Mrm2/Rps15/Gemin2/Eif3d/Rpsa/Mcts1/Rps25/Eif3i/Snrnp200/Eif2s2/Xab2/Aar2/Fau/Mcts2/Eif3g/Rps28/Sf3a2/Prpf6/Eif3a/Shq1/Ddx39b/Snrpd2/Rps19/Eif2d/Mbnl1/Tarbp2/Prpf8/Srsf6/Eif5/U2af2/Eral1/Prpf19/Prmt7/Naf1/Eif3b/Rpl11/Atm/Fastkd2/Smn1/N…
BP	GO:0016054	organic acid catabolic process	183	0.351482	1.58028	0.000366402	0.00978648	0.00875881	2773	tags=31%, list=19%, signal=25%	Hadh/Tat/Nagk/Acaa2/Ahcy/Mccc2/Abcb11/Mtln/Decr1/Pon3/Abhd3/Hsd17b4/Acsf3/Acadl/Aldh1l1/Il4i1/Lpin1/Hexa/Tha1/Cyp4f13/Cbs/Gcat/Amdhd2/Hadha/Ppm1k/Adtrp/Etfdh/Hsd17b10/Amt/Slc16a3/Echdc2/Abcd3/Hadhb/Aig1/Lpin3/Slc27a2/Bcat1/Lipe/Idnk/Naalad2/Echs1/Sord/Ddah1/Hdc/Gldc/Idua/Tdh/Etfbkmt/Scly/Acacb/Acadvl/Phyh/Hibch/Ldhc/Dbt/Hpd/Acad9
BP	GO:0046395	carboxylic acid catabolic process	183	0.351482	1.58028	0.000366402	0.00978648	0.00875881	2773	tags=31%, list=19%, signal=25%	Hadh/Tat/Nagk/Acaa2/Ahcy/Mccc2/Abcb11/Mtln/Decr1/Pon3/Abhd3/Hsd17b4/Acsf3/Acadl/Aldh1l1/Il4i1/Lpin1/Hexa/Tha1/Cyp4f13/Cbs/Gcat/Amdhd2/Hadha/Ppm1k/Adtrp/Etfdh/Hsd17b10/Amt/Slc16a3/Echdc2/Abcd3/Hadhb/Aig1/Lpin3/Slc27a2/Bcat1/Lipe/Idnk/Naalad2/Echs1/Sord/Ddah1/Hdc/Gldc/Idua/Tdh/Etfbkmt/Scly/Acacb/Acadvl/Phyh/Hibch/Ldhc/Dbt/Hpd/Acad9
BP	GO:0022618	protein-RNA complex assembly	172	0.357803	1.60751	0.00044896	0.0110967	0.00993143	4207	tags=43%, list=29%, signal=31%	Prkra/Rpl24/Lsm4/Ago4/Gcfc2/Rpl13a/Hsp90ab1/Mcat/Ago1/Eif2s3y/Snrpb/Rps6-ps4/Rpl5/Eif3e/Rpl38/Eif3l/Eif3k/Isy1/Rps27/Ago2/Hsp90aa1/Ruvbl2/Rps6/Rps5/Rps14/Nol3/Sf3a3/Mrm2/Rps15/Gemin2/Eif3d/Rpsa/Mcts1/Rps25/Eif3i/Snrnp200/Eif2s2/Xab2/Aar2/Fau/Mcts2/Eif3g/Rps28/Sf3a2/Prpf6/Eif3a/Shq1/Ddx39b/Snrpd2/Rps19/Eif2d/Mbnl1/Tarbp2/Prpf8/Srsf6/Eif5/U2af2/Eral1/Prpf19/Prmt7/Naf1/Eif3b/Rpl11/Atm/Fastkd2/Smn1/N…
BP	GO:0009199	ribonucleoside triphosphate metabolic process	229	0.367382	1.70478	1.75793e-05	0.000727783	0.00065136	2971	tags=36%, list=21%, signal=29%	Ndufs6/Eno2/Pklr/Atp5mc2/Nme4/Ndufa5/Ier3/Igf1/Ndufb4/Myh6/Prkag2/Antkmt/Pfkfb2/Selenon/Hnf1a/Slc4a4/Aldoc/Sdhc/Jmjd8/Ndufa3/Hk1/Ndufa8/Ndufa12/Ndufs3/Nme2/Cfh/Cbfa2t3/Hk2/Cox11/Nupr1/Tkfc/P2rx7/Hspa8/Enpp1/Sdhb/Ndufb8/Tgfb1/Ndufb9/Prkaa2/Ndufb1/Bad/Ndufv1/Ndufs5/Impdh2/Bloc1s6/Fis1/Aldoa/Ndufa7/Ndufa11/Ndufb5/Actn3/Atp5me/Ak4/Parp1/Mlst8/Atp6v1a/Nme1/Ndufa13/Atp5po/Ndufa1/Galk1/Prxl2c/Mtch2/Atp5…
BP	GO:0046034	ATP metabolic process	203	0.369903	1.68559	1.69487e-05	0.00071967	0.000644098	2971	tags=37%, list=21%, signal=30%	Ndufs6/Eno2/Pklr/Atp5mc2/Ndufa5/Ier3/Igf1/Ndufb4/Myh6/Prkag2/Antkmt/Pfkfb2/Selenon/Hnf1a/Slc4a4/Aldoc/Sdhc/Jmjd8/Ndufa3/Hk1/Ndufa8/Ndufa12/Ndufs3/Cfh/Cbfa2t3/Hk2/Cox11/Nupr1/Tkfc/P2rx7/Hspa8/Enpp1/Sdhb/Ndufb8/Tgfb1/Ndufb9/Prkaa2/Ndufb1/Bad/Ndufv1/Ndufs5/Bloc1s6/Fis1/Aldoa/Ndufa7/Ndufa11/Ndufb5/Actn3/Atp5me/Ak4/Parp1/Mlst8/Atp6v1a/Ndufa13/Atp5po/Ndufa1/Galk1/Prxl2c/Mtch2/Atp5mc1/Ndufs7/Ldhc/Fkrp/S…
BP	GO:0009205	purine ribonucleoside triphosphate metabolic process	224	0.369955	1.70831	8.74829e-06	0.000517399	0.000463068	2971	tags=36%, list=21%, signal=29%	Ndufs6/Eno2/Pklr/Atp5mc2/Nme4/Ndufa5/Ier3/Igf1/Ndufb4/Myh6/Prkag2/Antkmt/Pfkfb2/Selenon/Hnf1a/Slc4a4/Aldoc/Sdhc/Jmjd8/Ndufa3/Hk1/Ndufa8/Ndufa12/Ndufs3/Nme2/Cfh/Cbfa2t3/Hk2/Cox11/Nupr1/Tkfc/P2rx7/Hspa8/Enpp1/Sdhb/Ndufb8/Tgfb1/Ndufb9/Prkaa2/Ndufb1/Bad/Ndufv1/Ndufs5/Impdh2/Bloc1s6/Fis1/Aldoa/Ndufa7/Ndufa11/Ndufb5/Actn3/Atp5me/Ak4/Parp1/Mlst8/Atp6v1a/Nme1/Ndufa13/Atp5po/Ndufa1/Galk1/Prxl2c/Mtch2/Atp5…
BP	GO:0140053	mitochondrial gene expression	167	0.373786	1.67475	8.95792e-05	0.0027471	0.00245863	4216	tags=43%, list=30%, signal=31%	Mrpl14/Mrpl36/Coa3/Mrps18c/Gatb/Mrpl1/Mtg1/Mrpl47/Mrps21/Mrps16/Mrpl33/Mrpl19/Mrpl23/Hsd17b10/Rars2/Sars2/Mpv17l2/Chchd1/Mrps31/Mrpl15/Cfh/Mrpl16/Mterf2/Lrpprc/Mrpl22/Mrpl24/Malsu1/Mrps27/Mrps15/Mrpl11/Mrps18b/Rpusd4/Mrpl52/Mrpl58/Aars2/Mrpl17/Uqcc2/Mrps18a/Yars2/Iars2/Prkaa1/Pnpt1/Mrpl44/Mrps9/Mtres1/Mrpl39/Gars1/Gadd45gip1/Mrps22/Mrpl48/Fastk/Mrpl35/Mtpap/Mto1/Tbrg4/Tufm/Mrps23/C1qbp/Elac2/Mrpl…
BP	GO:0006164	purine nucleotide biosynthetic process	158	0.375655	1.6766	0.000137917	0.00400685	0.0035861	3415	tags=41%, list=24%, signal=31%	Ndufs6/Prps2/Atp5mc2/Nme4/Ndufa5/Nadsyn1/Ndufb4/Guk1/Antkmt/Dguok/Hnf1a/Sdhc/Naprt/Ndufa3/Ndufa8/Adss1/Ndufa12/Npr2/Ndufs3/Nme2/Cox11/Adcy1/Sdhb/Ndufb8/Tgfb1/Ndufb9/Ndufb1/Pfas/Mthfd1/Ndufv1/Ndufs5/Impdh2/Aldoa/Ndufa7/Ndufa11/Ndufb5/Idh2/Atp5me/Ak4/Parp1/Atp6v1a/Nme1/Ndufa13/Atp5po/Gart/Ndufa1/Atp5mc1/Impdh1/Ndufs7/Ldhc/Stoml2/Atic/Atp5pf/Slc25a12/Adcy6/Nudt2/Atp5mf/Aprt/Hprt1/Ndufa9/Ndufb7/Ndufc…
BP	GO:0009141	nucleoside triphosphate metabolic process	245	0.376244	1.75341	1.04608e-06	9.62389e-05	8.6133e-05	2971	tags=36%, list=21%, signal=29%	Ndufs6/Eno2/Pklr/Atp5mc2/Nudt15/Nme4/Ndufa5/Ier3/Smpdl3a/Igf1/Ndufb4/Myh6/Guk1/Prkag2/Antkmt/Pfkfb2/Dguok/Selenon/Hnf1a/Slc4a4/Aldoc/Sdhc/Jmjd8/Ndufa3/Hk1/Ndufa8/Ndufa12/Ndufs3/Nme2/Cfh/Cbfa2t3/Hk2/Cox11/Nupr1/Tkfc/P2rx7/Hspa8/Enpp1/Sdhb/Ndufb8/Tyms/Tgfb1/Ndufb9/Prkaa2/Ndufb1/Bad/Ndufv1/Ndufs5/Impdh2/Bloc1s6/Fis1/Aldoa/Ndufa7/Ndufa11/Ndufb5/Actn3/Dtymk/Atp5me/Ak4/Parp1/Mlst8/Atp6v1a/Nme1/Ndufa13/…
BP	GO:0008637	apoptotic mitochondrial changes	104	0.377956	1.56843	0.00293153	0.0484992	0.0434064	2007	tags=28%, list=14%, signal=24%	Bok/Acaa2/Atp2a1/Ier3/Pycard/Igf1/Mmp9/Bak1/Slc35f6/Tnfsf10/Ppm1k/Sfn/Slc25a4/Pink1/Pdcd5/Slc25a5/Eya2/Hk2/Bax/Vdac2/Timm50/Chchd10/Plaur/Bad/Erbb4/Bloc1s2/Jun/Ppif/Fis1
BP	GO:0009144	purine nucleoside triphosphate metabolic process	231	0.382444	1.77475	1.8083e-06	0.000157608	0.000141057	2971	tags=36%, list=21%, signal=29%	Ndufs6/Eno2/Pklr/Atp5mc2/Nudt15/Nme4/Ndufa5/Ier3/Igf1/Ndufb4/Myh6/Guk1/Prkag2/Antkmt/Pfkfb2/Dguok/Selenon/Hnf1a/Slc4a4/Aldoc/Sdhc/Jmjd8/Ndufa3/Hk1/Ndufa8/Ndufa12/Ndufs3/Nme2/Cfh/Cbfa2t3/Hk2/Cox11/Nupr1/Tkfc/P2rx7/Hspa8/Enpp1/Sdhb/Ndufb8/Tgfb1/Ndufb9/Prkaa2/Ndufb1/Bad/Ndufv1/Ndufs5/Impdh2/Bloc1s6/Fis1/Aldoa/Ndufa7/Ndufa11/Ndufb5/Actn3/Atp5me/Ak4/Parp1/Mlst8/Atp6v1a/Nme1/Ndufa13/Atp5po/Ndufa1/Galk1…
BP	GO:0046390	ribose phosphate biosynthetic process	156	0.383864	1.71634	7.46238e-05	0.00237648	0.00212693	3415	tags=41%, list=24%, signal=32%	Ndufs6/Prps2/Atp5mc2/Nme4/Ndufa5/Ndufb4/Guk1/Antkmt/Hnf1a/Sdhc/Ndufa3/Dhodh/Ndufa8/Adss1/Ndufa12/Npr2/Ndufs3/Nme2/Cox11/Adcy1/Sdhb/Ndufb8/Tgfb1/Uckl1/Ndufb9/Ndufb1/Pfas/Mthfd1/Ndufv1/Ndufs5/Impdh2/Aldoa/Ndufa7/Ndufa11/Ndufb5/Atp5me/Ak4/Parp1/Atp6v1a/Nme1/Ndufa13/Atp5po/Gart/Ndufa1/Upp1/Atp5mc1/Impdh1/Ndufs7/Ldhc/Stoml2/Atic/Atp5pf/Slc25a12/Adcy6/Nudt2/Cad/Atp5mf/Aprt/Hprt1/Ndufa9/Ndufb7/Ndufc1/At…
BP	GO:0022900	electron transport chain	109	0.389029	1.63071	0.00079057	0.0176917	0.0158339	4838	tags=52%, list=34%, signal=35%	Ndufs6/Fdx1/Ndufa5/Cox7a1/Dguok/Sdhc/Gba1/Etfdh/Ndufa8/Ndufa12/Pink1/Ndufs3/Sdhb/Ndufb8/Gpd2/Ndufb9/Ndufv1/Ndufa7/Cox7c/Mtch2/Uqcrb/Ndufs7/Slc1a3/Vps54/Slc25a12/Slc25a22/Uqcr10/Por/Uqcrc1/Ndufaf1/Iscu/Dhrs2/Ccnb1-ps/Aifm2/Got2/Cox5a/Uqcrh/Coq7/Ndufs2/Mybbp1a/Etfb/Ndufs1/Sod2/Cox7a2/Uqcrc2/Ndufv2/Cyc1/Dnajc15/Cox6a1/Cox4i1/Afg1l/Sdha/Etfrf1/Ndufv3/Cox5b/Got1/Ndufc2
BP	GO:0009060	aerobic respiration	173	0.396773	1.77921	6.35361e-06	0.000420863	0.000376669	5006	tags=58%, list=35%, signal=38%	Ndufs6/Ndufa5/Ndufb4/Cox7a1/Suclg1/Antkmt/Dguok/Idh1/Sdhc/Ndufa3/Ndufa8/Ndufa12/Pink1/Ndufs3/Cbfa2t3/Nupr1/Cox6c/Sdhb/Ndufb8/Msh2/Chchd10/Cat/Ndufb9/Ndufb1/Ndufv1/Ndufs5/Pdha1/Ppif/Aco2/Mrps36/Ndufa7/Ndufa11/Ndufb5/Idh2/Actn3/Cox7c/Atp5me/Ak4/Ndufa13/Atp5po/Ndufa1/Trpv4/Sucla2/Uqcc2/Mtch2/Uqcrb/Oxa1l/Ndufs7/Stoml2/Fh1/Idh3b/Atp5pf/Uqcr10/Col6a1/Atp5mf/Ndufa9/Uqcrc1/Ndufb7/Ndufaf1/Ndufc1/Atp5pd/Nd…
BP	GO:0097250	mitochondrial respirasome assembly	105	0.40094	1.66969	0.000529787	0.0127149	0.0113797	3513	tags=37%, list=25%, signal=28%	Ndufs6/Cox19/Coa3/Ndufa5/Coa4/Ndufb4/Cox7a1/Ndufa3/Ndufa8/Sdhaf4/Coa5/Ndufa12/Ndufs3/Ndufb8/Ndufb9/Ndufb1/Pet100/Ndufs5/Surf1/Bcs1l/Ndufa11/Ndufb5/Higd2a/Ndufa13/Ndufa1/Uqcc2/Oxa1l/Ndufs7/Lyrm2/Acad9/Tmem242/Ndufa9/Uqcrc1/Ndufb7/Ndufaf1/Ndufaf7/Ndufc1/Ndufb10/Coa8
BP	GO:0009260	ribonucleotide biosynthetic process	150	0.401942	1.77978	4.46418e-05	0.00150871	0.00135028	3415	tags=43%, list=24%, signal=33%	Ndufs6/Prps2/Atp5mc2/Nme4/Ndufa5/Ndufb4/Guk1/Antkmt/Hnf1a/Sdhc/Ndufa3/Dhodh/Ndufa8/Adss1/Ndufa12/Npr2/Ndufs3/Nme2/Cox11/Adcy1/Sdhb/Ndufb8/Tgfb1/Uckl1/Ndufb9/Ndufb1/Pfas/Mthfd1/Ndufv1/Ndufs5/Impdh2/Aldoa/Ndufa7/Ndufa11/Ndufb5/Atp5me/Ak4/Parp1/Atp6v1a/Nme1/Ndufa13/Atp5po/Gart/Ndufa1/Upp1/Atp5mc1/Impdh1/Ndufs7/Ldhc/Stoml2/Atic/Atp5pf/Slc25a12/Adcy6/Nudt2/Cad/Atp5mf/Aprt/Hprt1/Ndufa9/Ndufb7/Ndufc1/At…
BP	GO:0009152	purine ribonucleotide biosynthetic process	137	0.413396	1.7954	2.69822e-05	0.00101551	0.000908875	3415	tags=44%, list=24%, signal=34%	Ndufs6/Prps2/Atp5mc2/Nme4/Ndufa5/Ndufb4/Guk1/Antkmt/Hnf1a/Sdhc/Ndufa3/Ndufa8/Adss1/Ndufa12/Npr2/Ndufs3/Nme2/Cox11/Adcy1/Sdhb/Ndufb8/Tgfb1/Ndufb9/Ndufb1/Pfas/Mthfd1/Ndufv1/Ndufs5/Impdh2/Aldoa/Ndufa7/Ndufa11/Ndufb5/Atp5me/Ak4/Parp1/Atp6v1a/Nme1/Ndufa13/Atp5po/Gart/Ndufa1/Atp5mc1/Impdh1/Ndufs7/Ldhc/Stoml2/Atic/Atp5pf/Slc25a12/Adcy6/Nudt2/Atp5mf/Aprt/Hprt1/Ndufa9/Ndufb7/Ndufc1/Atp5pd/Ndufb10
BP	GO:0022904	respiratory electron transport chain	100	0.419384	1.74305	0.000250036	0.00713895	0.00638929	4838	tags=54%, list=34%, signal=36%	Ndufs6/Ndufa5/Cox7a1/Dguok/Sdhc/Gba1/Etfdh/Ndufa8/Ndufa12/Pink1/Ndufs3/Sdhb/Ndufb8/Gpd2/Ndufb9/Ndufv1/Ndufa7/Cox7c/Mtch2/Uqcrb/Ndufs7/Slc1a3/Vps54/Slc25a12/Slc25a22/Uqcr10/Uqcrc1/Ndufaf1/Iscu/Ccnb1-ps/Aifm2/Got2/Cox5a/Uqcrh/Coq7/Ndufs2/Mybbp1a/Etfb/Ndufs1/Sod2/Cox7a2/Uqcrc2/Ndufv2/Cyc1/Dnajc15/Cox6a1/Cox4i1/Afg1l/Sdha/Etfrf1/Ndufv3/Cox5b/Got1/Ndufc2
BP	GO:0006119	oxidative phosphorylation	134	0.42177	1.8303	1.43802e-05	0.000661046	0.00059163	5006	tags=61%, list=35%, signal=40%	Ndufs6/Ndufa5/Ndufb4/Cox7a1/Antkmt/Dguok/Sdhc/Ndufa3/Ndufa8/Ndufa12/Pink1/Ndufs3/Nupr1/Cox6c/Sdhb/Ndufb8/Msh2/Chchd10/Ndufb9/Ndufb1/Ndufv1/Ndufs5/Ppif/Ndufa7/Ndufa11/Ndufb5/Actn3/Cox7c/Atp5me/Ak4/Ndufa13/Atp5po/Ndufa1/Uqcc2/Mtch2/Uqcrb/Ndufs7/Stoml2/Atp5pf/Uqcr10/Atp5mf/Ndufa9/Uqcrc1/Ndufb7/Ndufaf1/Ndufc1/Atp5pd/Ndufb10/Iscu/Ccnb1-ps/Cox5a/Uqcrh/Coq7/Ndufs2/Atp5f1b/Atp5f1a/Ndufs1/Ndufa6/Cox7a2/At…
BP	GO:0009142	nucleoside triphosphate biosynthetic process	112	0.442072	1.86771	2.03584e-05	0.00082228	0.000735933	3415	tags=46%, list=24%, signal=35%	Ndufs6/Atp5mc2/Nme4/Ndufa5/Ndufb4/Antkmt/Hnf1a/Sdhc/Ndufa3/Ndufa8/Ndufa12/Ndufs3/Nme2/Cox11/Sdhb/Ndufb8/Tyms/Tgfb1/Ndufb9/Ndufb1/Ndufv1/Ndufs5/Impdh2/Aldoa/Ndufa7/Ndufa11/Ndufb5/Dtymk/Atp5me/Ak4/Parp1/Atp6v1a/Nme1/Ndufa13/Atp5po/Ndufa1/Atp5mc1/Impdh1/Ndufs7/Ldhc/Stoml2/Atp5pf/Slc25a12/Nudt2/Cad/Atp5mf/Ndufa9/Ndufb7/Ndufc1/Atp5pd/Ndufb10
BP	GO:0042274	ribosomal small subunit biogenesis	105	0.45179	1.88146	2.36686e-05	0.000911517	0.0008158	5028	tags=54%, list=35%, signal=35%	Tsr2/Mcat/Rps6-ps4/Rps27a/Rps23/Rps24/Rps27/Rps6/Rps5/Rps16/Rps15a/Rps14/Rps11/Rps12/Rps9/Rps15/Rpsa/Rps25/Aatf/Rps3a1/Rps17/Rps13/Rps4x/Fau/Npm1/Rps8/Rps28/Fbl/Rps19/Emg1/Wdr46/Rps7/Dhx37/Eral1/Utp18/Bysl/Rps21/Nol6/Heatr1/Wdr3/Nat10/Mettl17/Utp4/Riok3/Ltv1/Tsr3/Gtf2h5/Nop14/Rps27l/Nop56/Ercc2/Trmt112/Nop58/Fcf1/Utp20/Tbl3/Wdr43
BP	GO:0009201	ribonucleoside triphosphate biosynthetic process	106	0.454215	1.89449	1.44422e-05	0.000661046	0.00059163	3415	tags=45%, list=24%, signal=35%	Ndufs6/Atp5mc2/Nme4/Ndufa5/Ndufb4/Antkmt/Hnf1a/Sdhc/Ndufa3/Ndufa8/Ndufa12/Ndufs3/Nme2/Cox11/Sdhb/Ndufb8/Tgfb1/Ndufb9/Ndufb1/Ndufv1/Ndufs5/Impdh2/Aldoa/Ndufa7/Ndufa11/Ndufb5/Atp5me/Parp1/Atp6v1a/Nme1/Ndufa13/Atp5po/Ndufa1/Atp5mc1/Impdh1/Ndufs7/Ldhc/Stoml2/Atp5pf/Slc25a12/Nudt2/Cad/Atp5mf/Ndufa9/Ndufb7/Ndufc1/Atp5pd/Ndufb10
BP	GO:0009145	purine nucleoside triphosphate biosynthetic process	102	0.455814	1.89586	3.68029e-05	0.00133695	0.00119656	3415	tags=46%, list=24%, signal=35%	Ndufs6/Atp5mc2/Nme4/Ndufa5/Ndufb4/Antkmt/Hnf1a/Sdhc/Ndufa3/Ndufa8/Ndufa12/Ndufs3/Nme2/Cox11/Sdhb/Ndufb8/Tgfb1/Ndufb9/Ndufb1/Ndufv1/Ndufs5/Impdh2/Aldoa/Ndufa7/Ndufa11/Ndufb5/Atp5me/Parp1/Atp6v1a/Nme1/Ndufa13/Atp5po/Ndufa1/Atp5mc1/Impdh1/Ndufs7/Ldhc/Stoml2/Atp5pf/Slc25a12/Nudt2/Atp5mf/Ndufa9/Ndufb7/Ndufc1/Atp5pd/Ndufb10
BP	GO:0009206	purine ribonucleoside triphosphate biosynthetic process	101	0.463058	1.92755	4.61565e-06	0.000347433	0.000310949	3415	tags=47%, list=24%, signal=36%	Ndufs6/Atp5mc2/Nme4/Ndufa5/Ndufb4/Antkmt/Hnf1a/Sdhc/Ndufa3/Ndufa8/Ndufa12/Ndufs3/Nme2/Cox11/Sdhb/Ndufb8/Tgfb1/Ndufb9/Ndufb1/Ndufv1/Ndufs5/Impdh2/Aldoa/Ndufa7/Ndufa11/Ndufb5/Atp5me/Parp1/Atp6v1a/Nme1/Ndufa13/Atp5po/Ndufa1/Atp5mc1/Impdh1/Ndufs7/Ldhc/Stoml2/Atp5pf/Slc25a12/Nudt2/Atp5mf/Ndufa9/Ndufb7/Ndufc1/Atp5pd/Ndufb10
BP	GO:0032543	mitochondrial translation	128	0.465159	2.01862	4.9058e-07	5.416e-05	4.84727e-05	4216	tags=48%, list=30%, signal=34%	Mrpl14/Mrpl36/Coa3/Mrps18c/Gatb/Mrpl1/Mtg1/Mrpl47/Mrps21/Mrps16/Mrpl33/Mrpl19/Mrpl23/Rars2/Sars2/Mpv17l2/Chchd1/Mrps31/Mrpl15/Mrpl16/Lrpprc/Mrpl22/Mrpl24/Malsu1/Mrps27/Mrps15/Mrpl11/Mrps18b/Rpusd4/Mrpl52/Mrpl58/Aars2/Mrpl17/Uqcc2/Mrps18a/Yars2/Iars2/Mrpl44/Mrps9/Mrpl39/Gars1/Gadd45gip1/Mrps22/Mrpl48/Mrpl35/Tufm/Mrps23/C1qbp/Mrpl42/Mrpl21/Mrpl46/Fastkd2/Aurkaip1/Wars2/Mrpl2/Mrps5/Mrps24/Mrps2/Mrpl…
BP	GO:0002181	cytoplasmic translation	163	0.550293	2.46849	2.68227e-14	1.11046e-11	9.93851e-12	3336	tags=60%, list=23%, signal=47%	Alkbh3/Parp16/Rpl9-ps6/Rpl24/Rpl6l/Rps18/Rpl13a/Rpl3/Rpl7/Rpl27/Rpl9/Eif2s3y/Rps6-ps4/Rpl12/Rps2/Rpl37a/Rpl5/Rpl8/Eif3e/Rpl17/Rps3/Rpl38/Rpl36a/Rpl22/Rpl27a/Rpl21/Rpl7a/Eif3l/Rps29/Rpl15/Rpl30/Rps27a/Eif3k/Rpl29/Rps23/Rps24/Eif4ebp1/Rpl32/Uba52/Rpl36/Rps6/Rps5/Rpl19/Rps16/Rpl18a/Rps15a/Rpl34/Rps14/Rps11/Rps20/Eef2/Rplp2/Impact/Rpl23a/Eif4a2/Drg2/Rpl4/Igf2bp1/Rps12/Rps9/Rpl13/Rpl14/Rps15/Rpl26/Eif…
CC	GO:0005773	vacuole	523	0.258445	1.27283	0.00262876	0.045039	0.0403095	3692	tags=33%, list=26%, signal=26%	Slc29a3/Chmp4c/Rragd/Arsa/Fuca2/Anxa2/Plekhf1/Borcs7/H2-Oa/Tmem106b/Man2b2/Tmem63a/Clcn4/Pla2g10/Nsg2/Tspan1/Itm2c/Atp6v1f/Plbd1/Cln3/Akr1b8/Dpp7/Stxbp2/Il4i1/Naga/Hexa/Slc35f6/P2rx4/Man2b1/Vamp2/Cybrd1/Ctsd/Stx3/Slc30a2/Lamtor5/Anxa11/Glmp/Doc2a/Shkbp1/Gba1/Slc26a11/Fgfr3/Grn/Snx1/Ulk3/Wdr83/Gaa/Ppt2/Dapk2/Tbc1d17/Slc11a1/Lamp1/Chmp6/Tfeb/Dnase2a/Trip10/Tm9sf1/Hsp90ab1/Naglu/Gusb/Prtn3/Hspa8/Cub…
CC	GO:0005615	extracellular space	707	0.2666	1.35328	7.3742e-05	0.00237648	0.00212693	1972	tags=24%, list=14%, signal=22%	Fabp3/Cstb/Wnt10b/Ccn1/Fgf3/Loxl2/Arsa/Fuca2/Anxa2/H2bc8/Col9a2/Osm/Prl3b1/Npy/Cthrc1/Retn/Ren1/Col12a1/Meltf/Pank4/Pnliprp2/Pla2g10/Inhbb/Vnn1/Pon3/Pirb/Smpdl3a/Col5a2/F5/Cnp/Igf1/Plbd1/Lgals9/Cklf/Dhh/Ifnar2/Gzmm/C4a/Chrd/Cxcl12/Mill2/Adm/Serpinb6a/Clu/Aebp1/Fbn1/Eng/Cd81/Clic1/Fetub/Mmp9/Sema3c/Smoc1/Bhmt/Gprc5a/Fndc4/Cp/Pcsk6/Ccn2/Scube1/Nrg2/Lcat/Wnt4/Vwf/Apob/Tnfsf10/Alad/Mfge8/Man2b1/Angpt…
CC	GO:0031966	mitochondrial membrane	691	0.275187	1.39085	1.07472e-05	0.000586541	0.000524949	4282	tags=39%, list=30%, signal=29%	Slc29a3/Hadh/Bok/Ndufs6/Fdx1/Slc25a21/Acaa2/Mrpl14/Mrpl36/Ass1/Atp5mc2/Coa3/Mrps18c/Aifm3/Vrk2/Ndufa5/Micu3/Mtln/Ppox/Cnp/Adck1/Ndufb4/Slc25a1/Cox7a1/Suclg1/Mrpl1/Clu/Acadl/Antkmt/Apool/Bak1/Lpin1/Dnajc19/Timm10b/Selenon/Mtg1/Mrpl47/Mrps21/Mrps16/Slc30a2/Mrpl33/Gcat/Sdhc/Gramd4/Smim30/Plcd1/Mtx1/Reep1/Fdxr/Rnf5/Hadha/Cebpzos/Mrpl19/Ndufa3/Dhodh/Hk1/Etfdh/Ndufa8/Pigbos1/Mrpl23/Hsd17b10/Ckmt1/Cox15…
CC	GO:0005740	mitochondrial envelope	737	0.275388	1.39611	1.47698e-05	0.000661046	0.00059163	3823	tags=33%, list=27%, signal=26%	Slc29a3/Hadh/Bok/Ndufs6/Fdx1/Slc25a21/Acaa2/Mrpl14/Mrpl36/Ass1/Cox19/Atp5mc2/Coa3/Mrps18c/Aifm3/Vrk2/Nme4/Ndufa5/Micu3/Mtln/Coa4/Ppox/Cnp/Adck1/Ndufb4/Slc25a1/Cox7a1/Suclg1/Mrpl1/Clu/Acadl/Antkmt/Apool/Chchd5/Bak1/Lpin1/Dnajc19/Cidea/Timm10b/Chchd7/Selenon/Mtg1/Mrpl47/Mrps21/Mrps16/Slc30a2/Mrpl33/Gcat/Sdhc/Gramd4/Smim30/Plcd1/Mtx1/Reep1/Fdxr/Rnf5/Hadha/Cebpzos/Mrpl19/Ndufa3/Dhodh/Hk1/Etfdh/Ndufa8…
CC	GO:0000323	lytic vacuole	434	0.285739	1.40048	0.000402938	0.0102656	0.00918764	3260	tags=31%, list=23%, signal=25%	Slc29a3/Chmp4c/Rragd/Arsa/Fuca2/Anxa2/Plekhf1/Borcs7/H2-Oa/Tmem106b/Man2b2/Tmem63a/Clcn4/Pla2g10/Nsg2/Tspan1/Itm2c/Plbd1/Cln3/Akr1b8/Dpp7/Stxbp2/Il4i1/Naga/Hexa/Slc35f6/P2rx4/Man2b1/Cybrd1/Ctsd/Stx3/Slc30a2/Lamtor5/Anxa11/Glmp/Doc2a/Shkbp1/Gba1/Slc26a11/Fgfr3/Grn/Snx1/Wdr83/Gaa/Ppt2/Slc11a1/Lamp1/Chmp6/Tfeb/Dnase2a/Trip10/Tm9sf1/Hsp90ab1/Naglu/Gusb/Prtn3/Hspa8/Cubn/Sppl2b/Capn1/Abca3/Abca5/Adam8/…
CC	GO:0005764	lysosome	434	0.285739	1.40048	0.000402938	0.0102656	0.00918764	3260	tags=31%, list=23%, signal=25%	Slc29a3/Chmp4c/Rragd/Arsa/Fuca2/Anxa2/Plekhf1/Borcs7/H2-Oa/Tmem106b/Man2b2/Tmem63a/Clcn4/Pla2g10/Nsg2/Tspan1/Itm2c/Plbd1/Cln3/Akr1b8/Dpp7/Stxbp2/Il4i1/Naga/Hexa/Slc35f6/P2rx4/Man2b1/Cybrd1/Ctsd/Stx3/Slc30a2/Lamtor5/Anxa11/Glmp/Doc2a/Shkbp1/Gba1/Slc26a11/Fgfr3/Grn/Snx1/Wdr83/Gaa/Ppt2/Slc11a1/Lamp1/Chmp6/Tfeb/Dnase2a/Trip10/Tm9sf1/Hsp90ab1/Naglu/Gusb/Prtn3/Hspa8/Cubn/Sppl2b/Capn1/Abca3/Abca5/Adam8/…
CC	GO:0019866	organelle inner membrane	510	0.326593	1.61182	4.22114e-08	5.82517e-06	5.21347e-06	4280	tags=42%, list=30%, signal=30%	Hadh/Bok/Ndufs6/Fdx1/Slc25a21/Acaa2/Mrpl14/Mrpl36/Coa3/Mrps18c/Spag4/Aifm3/Ndufa5/Micu3/Mtln/Ppox/Cnp/Adck1/Ndufb4/Slc25a1/Cox7a1/Suclg1/Mrpl1/Clu/Apool/Dnajc19/Timm10b/Majin/Mtg1/Mrpl47/Mrps21/Mrps16/Slc30a2/Mrpl33/Gcat/Sdhc/Mtx1/Fdxr/Hadha/Tmx4/Mrpl19/Ndufa3/Dhodh/Etfdh/Ndufa8/Mrpl23/Hsd17b10/Ckmt1/Cox15/Lemd2/Mpv17l2/Ndufa12/Chchd1/Mrps31/Slc25a4/Pink1/Ndufs3/Mrpl15/Abcb8/Slc25a5/Abcd3/Mrpl16/…
CC	GO:0030312	external encapsulating structure	316	0.326695	1.56667	4.1313e-05	0.00145562	0.00130277	1963	tags=28%, list=14%, signal=25%	Cstb/Ccn1/Nid1/Loxl2/Anxa2/Col9a2/Hmcn2/Clic3/Cthrc1/Tgm2/Anxa3/Col12a1/P3h2/Gsto1/Col5a2/Anxa9/Adamtsl5/Igf1/Lgals9/Adamts14/Serpinb6a/Clu/Fbn1/Adamts10/Mmp9/Sema3c/Entpd2/Smoc1/Pcsk6/Ccn2/Spock2/Wnt4/Plscr1/Pcolce2/Vwf/Mfge8/Angptl6/Lad1/Ctsd/Col18a1/Col4a1/Cilp/Mfap4/Bgn/Serpine1/Anxa11/Ntn4/Anxa4/Plxnb2/Lgals4/Kng1/Efemp2/Bmp1/Hmcn1/Egfl7/S100a11/Adamts6/Col3a1/Fbln2/Hpse2/Muc5b/Pxdn/Gpc4/Fn1…
CC	GO:0031012	extracellular matrix	315	0.327549	1.57305	2.16086e-05	0.000851996	0.000762529	1963	tags=28%, list=14%, signal=25%	Cstb/Ccn1/Nid1/Loxl2/Anxa2/Col9a2/Hmcn2/Clic3/Cthrc1/Tgm2/Anxa3/Col12a1/P3h2/Gsto1/Col5a2/Anxa9/Adamtsl5/Igf1/Lgals9/Adamts14/Serpinb6a/Clu/Fbn1/Adamts10/Mmp9/Sema3c/Entpd2/Smoc1/Pcsk6/Ccn2/Spock2/Wnt4/Plscr1/Pcolce2/Vwf/Mfge8/Angptl6/Lad1/Ctsd/Col18a1/Col4a1/Cilp/Mfap4/Bgn/Serpine1/Anxa11/Ntn4/Anxa4/Plxnb2/Lgals4/Kng1/Efemp2/Bmp1/Hmcn1/Egfl7/S100a11/Adamts6/Col3a1/Fbln2/Hpse2/Muc5b/Pxdn/Gpc4/Fn1…
CC	GO:0005743	mitochondrial inner membrane	468	0.346028	1.70478	3.74886e-09	5.64373e-07	5.05109e-07	4280	tags=43%, list=30%, signal=31%	Hadh/Bok/Ndufs6/Fdx1/Slc25a21/Acaa2/Mrpl14/Mrpl36/Coa3/Mrps18c/Aifm3/Ndufa5/Micu3/Mtln/Ppox/Cnp/Adck1/Ndufb4/Slc25a1/Cox7a1/Suclg1/Mrpl1/Clu/Apool/Dnajc19/Timm10b/Mtg1/Mrpl47/Mrps21/Mrps16/Slc30a2/Mrpl33/Gcat/Sdhc/Mtx1/Fdxr/Hadha/Mrpl19/Ndufa3/Dhodh/Etfdh/Ndufa8/Mrpl23/Hsd17b10/Ckmt1/Cox15/Mpv17l2/Ndufa12/Chchd1/Mrps31/Slc25a4/Pink1/Ndufs3/Mrpl15/Abcb8/Slc25a5/Abcd3/Mrpl16/Cox11/Cox6c/Vdac2/Hadhb…
CC	GO:1990904	ribonucleoprotein complex	681	0.347225	1.75238	3.7311e-13	8.82672e-11	7.89983e-11	4316	tags=40%, list=30%, signal=29%	Mrpl14/Mrpl36/Mrps18c/Prkra/Rpl9-ps6/Pcbp4/Rpl24/Mrpl1/Rpp25l/Rpl6l/Mrpl47/Dqx1/Mrps21/Mrps16/Mrpl33/Rps18-ps6/Mrpl19/Ppil3/Lsm4/Mrpl23/Hsd17b10/Rps18-ps5/Wdr83/Slirp/Mpv17l2/Ago4/Esrp2/Gcfc2/Chchd1/Mrps31/Rps18/Mrpl15/Rpl13a/Rpl3/Rpl7/Rpl27/Mrpl16/Rbms1/Eftud2/Lsm5/Hspa8/Rpl9/Zfp827/Rack1/Ago1/Snrpb/Lrpprc/Mrpl22/Rps6-ps4/Actb/Rpl12/Rps2/Mrpl24/Mrps27/Rpl37a/Rpl5/Rpl8/Eif3e/Rpl17/Rps3/Mrps15/Rpl…
CC	GO:0005759	mitochondrial matrix	333	0.351011	1.68213	2.58363e-07	3.29115e-05	2.94555e-05	4280	tags=44%, list=30%, signal=32%	Hadh/Fdx1/Acaa2/Mrpl14/Top1mt/Mrpl36/Mrps18c/Mccc2/Nme4/Bola3/Mrpl1/Acadl/Cbr2/Acss1/Dnajc19/Mmut/Mtg1/Mrpl47/Mrps21/Mrps16/Mrpl33/Hadha/Mrpl19/Ppm1k/Etfdh/Mrpl23/Hsd17b10/Sdhaf4/Cox15/Alkbh7/Sars2/Mpv17l2/Chchd1/Mrps31/Mrpl15/Nags/Slc25a5/Mrpl16/Iba57/Mterf2/Vdac2/Hadhb/Lrpprc/Ethe1/Tyms/Mrpl22/Chpf/Mrpl24/Malsu1/Mrps27/Rps3/Mrps15/Mrpl11/Atg4d/Mrps18b/Pdha1/Ppif/Echs1/Aco2/Rpusd4/Pmpcb/Mrpl52/D…
CC	GO:0062023	collagen-containing extracellular matrix	249	0.356234	1.66615	1.23887e-05	0.000621686	0.000556404	1963	tags=30%, list=14%, signal=26%	Cstb/Ccn1/Nid1/Loxl2/Anxa2/Col9a2/Hmcn2/Tgm2/Anxa3/Col12a1/P3h2/Gsto1/Col5a2/Anxa9/Igf1/Lgals9/Serpinb6a/Clu/Fbn1/Adamts10/Mmp9/Sema3c/Entpd2/Smoc1/Pcsk6/Spock2/Plscr1/Pcolce2/Vwf/Mfge8/Angptl6/Lad1/Ctsd/Col18a1/Col4a1/Cilp/Mfap4/Bgn/Serpine1/Anxa11/Ntn4/Anxa4/Plxnb2/Lgals4/Kng1/Efemp2/Bmp1/Hmcn1/Egfl7/S100a11/Col3a1/Fbln2/Pxdn/Gpc4/Fn1/Rell2/Adamts4/Prg4/Col23a1/Col5a1/Postn/Lamb2/Col27a1/Serpin…
CC	GO:1990204	oxidoreductase complex	127	0.365924	1.5822	0.00165535	0.0318751	0.0285279	4279	tags=46%, list=30%, signal=32%	Ndufs6/Cyba/Ndufa5/Ndufb4/Cox7a1/Sdhc/Ncf2/Hadha/Ndufa3/Ndufa8/Amt/Ndufa12/Ndufs3/Cox6c/Hadhb/Sdhb/Ndufb8/Cat/Ndufb9/Ndufb1/Ndufv1/Ndufs5/Pdha1/Mrps36/Gldc/Ndufa7/Ndufa11/Ndufb5/Cox7c/Ndufa13/Ndufa1/Acacb/Uqcrb/Ndufs7/Dbt/Idh3b/Cbr4/Rrm2/Uqcr10/Ndufa9/Uqcrc1/Ndufb7/Ndufc1/Ndufb10/Pdhx/Cox5a/Uqcrh/Bckdha/Ndufs2/Pdhb/Ndufs1/Ndufa6/Cox7a2/Gcsh/Cox6b1/Uqcrc2/Ndufv2/Cyc1
CC	GO:0030684	preribosome	106	0.398926	1.66388	0.000760253	0.0172463	0.0154353	5058	tags=46%, list=35%, signal=30%	Rps6-ps4/Rps27a/Rps23/Rps24/Rps27/Rps6/Rps5/Rps16/Rps15a/Rps14/Rps11/Rps12/Rps9/Aatf/Rps3a1/Rps17/Rps13/Rps4x/Rps8/Rps28/Fbl/Rps19/Rrp1/Emg1/Wdr46/Rps7/Dhx37/Ftsj3/Utp18/Bysl/Nol6/Heatr1/Noc4l/Wdr3/Nat10/Wdr74/Utp4/Riok3/Ltv1/Nop14/Mrto4/Nop56/Nop58/Mdn1/Fcf1/Utp20/Tbl3/Wdr43/Rrp15
CC	GO:0098798	mitochondrial protein-containing complex	168	0.46154	2.06752	2.78553e-09	4.61283e-07	4.12844e-07	4280	tags=50%, list=30%, signal=35%	Mrpl14/Mrpl36/Mrps18c/Micu3/Mrpl1/Apool/Dnajc19/Timm10b/Mrpl47/Mrps21/Mrps16/Mrpl33/Mtx1/Hadha/Mrpl19/Etfdh/Mrpl23/Hsd17b10/Mpv17l2/Chchd1/Mrps31/Slc25a4/Mrpl15/Slc25a5/Mrpl16/Bax/Hadhb/Timm50/Mrpl22/Chchd10/Mrpl24/Mrps27/Phb1/Mrps15/Mrpl11/Mrps18b/Ppif/Pmpcb/Mrpl52/Mrpl58/Mrpl17/Acacb/Micos13/Mrps18a/Phb2/Timm22/Pnpt1/Mrpl44/Mrps9/Mrpl39/Gadd45gip1/Mtx3/Mrps22/Mrpl48/Grpel1/Samm50/Mrpl35/Isca2/T…
CC	GO:0005840	ribosome	236	0.531527	2.4801	1.15638e-18	6.38322e-16	5.71292e-16	3342	tags=53%, list=23%, signal=41%	Mrpl14/Mrpl36/Mrps18c/Rpl9-ps6/Rpl24/Mrpl1/Rpl6l/Mtg1/Mrpl47/Mrps21/Mrps16/Mrpl33/Rps18-ps6/Mrpl19/Mrpl23/Rps18-ps5/Mpv17l2/Chchd1/Mrps31/Rps18/Mrpl15/Rpl13a/Rpl3/Rpl7/Rpl27/Mrpl16/Rpl9/Rack1/Mrpl22/Rps6-ps4/Rpl12/Rps2/Mrpl24/Mrps27/Rpl37a/Rpl5/Rpl8/Eef1a1/Rpl17/Rps3/Mrps15/Rpl38/Mrpl11/Rpl36a/Rpl22/Rpl27a/Rpl21/Rpl7a/Rps29/Rpl15/Rpl30/Mrps18b/Rps27a/Rpl29/Rps23/Rps24/Rps27/Rpl34-ps1/Rpl32/Pelo/U…
CC	GO:0022626	cytosolic ribosome	121	0.596696	2.56396	6.7234e-14	2.22679e-11	1.99296e-11	3336	tags=69%, list=23%, signal=54%	Rpl9-ps6/Rpl24/Rpl6l/Rps18/Rpl13a/Rpl3/Rpl7/Rpl27/Rpl9/Rps6-ps4/Rpl12/Rps2/Rpl37a/Rpl5/Rpl8/Eef1a1/Rpl17/Rps3/Rpl38/Rpl36a/Rpl22/Rpl27a/Rpl21/Rpl7a/Rps29/Rpl15/Rpl30/Rps27a/Rpl29/Rps23/Rps24/Rps27/Rpl34-ps1/Rpl32/Pelo/Uba52/Rpl36/Rps6/Rpl35rt/Rpl10/Rps5/Rpl19/Rps16/Rpl18a/Rps15a/Rpl34/Rps4l/Rps14/Rps11/Rps20/Rplp2/Rpl23a/Rpl4/Rps12/Rps9/Rpl13/Rpl14/Rps15/Rpl26/Rpsa/Mcts1/Rps25/Rpl10a/Rpl35a/Rps3a…
CC	GO:0015934	large ribosomal subunit	118	0.597921	2.56123	1.42595e-13	3.93563e-11	3.52235e-11	3290	tags=60%, list=23%, signal=47%	Mrpl14/Mrpl36/Rpl9-ps6/Rpl24/Mrpl1/Rpl6l/Mrpl47/Mrpl33/Mrpl19/Mrpl23/Mpv17l2/Mrpl15/Rpl13a/Rpl3/Rpl7/Rpl27/Mrpl16/Rpl9/Mrpl22/Rpl12/Mrpl24/Rpl37a/Rpl5/Rpl8/Rpl17/Rpl38/Mrpl11/Rpl36a/Rpl22/Rpl27a/Rpl21/Rpl7a/Rpl15/Rpl30/Rpl29/Rpl34-ps1/Rpl32/Uba52/Rpl36/Mrpl52/Rpl35rt/Rpl10/Rpl19/Rpl18a/Rpl34/Mrpl58/Rplp2/Rpl23a/Mrpl17/Rpl4/Rps12/Rpl13/Rpl14/Rpl26/Mrps18a/Rpl10a/Rpl35a/Rpl31/Rpl18/Rpl37/Rpl6/Npm1/…
CC	GO:0044391	ribosomal subunit	192	0.605088	2.73994	1.16841e-22	1.93488e-19	1.7317e-19	3336	tags=61%, list=23%, signal=47%	Mrpl14/Mrpl36/Mrps18c/Rpl9-ps6/Rpl24/Mrpl1/Rpl6l/Mrpl47/Mrps21/Mrps16/Mrpl33/Rps18-ps6/Mrpl19/Mrpl23/Rps18-ps5/Mpv17l2/Chchd1/Mrps31/Rps18/Mrpl15/Rpl13a/Rpl3/Rpl7/Rpl27/Mrpl16/Rpl9/Rack1/Mrpl22/Rps6-ps4/Rpl12/Rps2/Mrpl24/Mrps27/Rpl37a/Rpl5/Rpl8/Rpl17/Rps3/Mrps15/Rpl38/Mrpl11/Rpl36a/Rpl22/Rpl27a/Rpl21/Rpl7a/Rps29/Rpl15/Rpl30/Mrps18b/Rps27a/Rpl29/Rps23/Rps24/Rps27/Rpl34-ps1/Rpl32/Uba52/Rpl36/Rps6/M…
MF	GO:0004930	G protein-coupled receptor activity	126	-0.43509	-1.72806	6.49529e-05	0.00215124	0.00192534	2545	tags=43%, list=18%, signal=36%	Vmn2r51/Esr1/Chrm3/Cmklr2/Gpr68/Adcyap1r1/Fzd9/Adgrg5/Gabbr1/Qrfprl/Fzd4/Vmn1r203/Gpr158/Vmn2r114/Tpra1/Grm2/Nlrp6/Adgre4/Adgrl4/Fzd8/Vmn2r92/Gpr50/Celsr2/Adgrb1/Tacr3/Vmn2r94/Adgrl3/Ccr3/Gpr35/S1pr3/Adra2b/Or5p52/Gpr27/Gpr179/Fzd2/Vmn1r229/Tas1r1/Opn3/Vmn1r76/Kctd12/Gpr146/Htr5a/Gpr19/Ptger4/Adgrb2/Vmn2r25/Gpr63/F2r/Ltb4r2/Ltb4r1/Lgr6/Fzd7/Vmn1r210/Tbxa2r
MF	GO:1990756	ubiquitin-like ligase-substrate adaptor activity	121	-0.396923	-1.56899	0.00242311	0.042688	0.0382053	2804	tags=37%, list=20%, signal=30%	Pramel23/Oog4/Klhl22/Fbxo11/Pramel30/Fem1al/Pramel21/Fem1c/Pcmtd1/Fbxo45/Klhl28/Klhl7/Socs7/Fem1b/Kbtbd6/Daw1/Fem1a/Kbtbd7/Klhl29/Klhdc2/Pramel12/Suv39h2/Kbtbd8/Sh3bgrl/Pramel18/Pramel26/Pramel19/Pramel25/Klhl8/Pramel32/Klhdc1/Pramel11/Spsb1/Pramel27/Klhl25/Oog2/Arrdc4/Kctd17/Pramel51/Oog3/Pramel34/Pramel14/Lrrc75a/Pramel24/Pramel15
MF	GO:0140767	enzyme-substrate adaptor activity	132	-0.396723	-1.58259	0.00199463	0.036298	0.0324864	2804	tags=31%, list=20%, signal=25%	Fbxo45/Klhl28/Klhl7/Socs7/Fem1b/Kbtbd6/Daw1/Fem1a/Kbtbd7/Klhl29/Klhdc2/Pramel12/Epc1/Suv39h2/Kbtbd8/Rragc/Sh3bgrl/Pramel18/Pramel26/Pramel19/Pramel25/Klhl8/Nmnat1/Dtx3l/Pramel32/Klhdc1/Pramel11/Spsb1/Pramel27/Klhl25/Oog2/Arrdc4/Kctd17/Pramel51/Oog3/Nmnat2/Pramel34/Pramel14/Lrrc75a/Pramel24/Pramel15
MF	GO:0004888	transmembrane signaling receptor activity	367	-0.357205	-1.59686	7.40055e-06	0.000471358	0.000421862	2545	tags=36%, list=18%, signal=30%	Adcyap1r1/Fzd9/Adgrg5/Gabbr1/Il6st/Prlr/Unc5c/Kdr/Grik5/Or10al2/Qrfprl/Ntrk1/Unc5b/Or51v8/Or2t29/Sort1/Gabrq/Kit/Ifnar1/Vldlr/Fzd4/Vmn1r203/Or1ab2/Ror1/Fgfrl1/Nrp1/Gpr158/Vmn2r114/Ngfr/Cd300lf/Tpra1/Grik2/Cd4/Grm2/Il1rap/Nlrp6/Unc5d/Epha3/Gabre/Adgre4/Adgrl4/Egfr/Il1r1/Lrp8/Il10rb/Tek/Fzd8/Cd160/Tgfbr1/Mst1r/Vmn2r92/Gpr50/Celsr2/Ptch2/Glra4/Gabra3/Acvrl1/Chrng/Antxr1/Adgrb1/Il31ra/Il17rc/Tacr3/Pa…
MF	GO:0038023	signaling receptor activity	499	-0.33209	-1.52078	1.09799e-05	0.000586541	0.000524949	2545	tags=32%, list=18%, signal=27%	Adcyap1r1/Fzd9/Adgrg5/Gabbr1/Il6st/Prlr/Unc5c/Kdr/A530064D06Rik/Grik5/Or10al2/Gucy2c/Qrfprl/Ntrk1/Unc5b/Asgr2/Or51v8/Or2t29/Sort1/Gabrq/Kit/Ifnar1/Vldlr/Fzd4/Vmn1r203/Or1ab2/Ror1/Fgfrl1/Nrp1/Gpr158/Vmn2r114/Ngfr/Cd300lf/Tpra1/Slamf1/Grik2/Cd4/Grm2/Il1rap/Nlrp6/Unc5d/Klrb1c/Epha3/Gabre/Rtbdn/Adgre4/Prnp/Unc13c/Cd47/Adgrl4/Egfr/Il1r1/Lrp8/Il10rb/Tlr9/Tek/Fzd8/9830107B12Rik/Paqr6/Cd160/Nr2e1/Tgfbr1/…
MF	GO:0060089	molecular transducer activity	499	-0.33209	-1.52078	1.09799e-05	0.000586541	0.000524949	2545	tags=32%, list=18%, signal=27%	Adcyap1r1/Fzd9/Adgrg5/Gabbr1/Il6st/Prlr/Unc5c/Kdr/A530064D06Rik/Grik5/Or10al2/Gucy2c/Qrfprl/Ntrk1/Unc5b/Asgr2/Or51v8/Or2t29/Sort1/Gabrq/Kit/Ifnar1/Vldlr/Fzd4/Vmn1r203/Or1ab2/Ror1/Fgfrl1/Nrp1/Gpr158/Vmn2r114/Ngfr/Cd300lf/Tpra1/Slamf1/Grik2/Cd4/Grm2/Il1rap/Nlrp6/Unc5d/Klrb1c/Epha3/Gabre/Rtbdn/Adgre4/Prnp/Unc13c/Cd47/Adgrl4/Egfr/Il1r1/Lrp8/Il10rb/Tlr9/Tek/Fzd8/9830107B12Rik/Paqr6/Cd160/Nr2e1/Tgfbr1/…
MF	GO:0001216	DNA-binding transcription activator activity	383	-0.314808	-1.41489	0.00144499	0.0284869	0.0254956	2719	tags=27%, list=19%, signal=23%	Hhex/Hif1a/Ehf/Pdx1/Sox7/Tfap2a/Sall2/Prdm16/Foxo1/Mlxipl/Elf1/Zfp523/Tcf4/Tbx21/Dbp/Ubp1/Foxk2/Gzf1/Zfp948/Gcm1/Zfp738/Glis3/Clock/Smad3/Csrnp3/Rfx5/Nfatc1/Zfp974/E2f5/Foxj3/Nobox/Onecut1/E2f1/Barhl1/Nfat5/Zfp639/Mybl1/Gli2/Zfp780b/Mef2b/Rax/Irx3/Zfp62/Hoxa7/Creb3l4/Arx/Ebf3/Rfx4/Gbx2/Nr2e1/Mycn/Bnc1/Hivep2/Nr4a2/Trp63/Klf6/Meis2/Pou4f1/Zfp677/Fosb/Foxd1/Lmx1b/Zic3/Plag1/Sohlh2/Hsf5/Esr2/Fos/Zic…
MF	GO:0001228	DNA-binding transcription activator activity, RNA polymerase II-specific	375	-0.307836	-1.38249	0.00239968	0.042688	0.0382053	2719	tags=27%, list=19%, signal=23%	Lmx1a/Foxc1/Hhex/Hif1a/Ehf/Pdx1/Sox7/Tfap2a/Sall2/Prdm16/Foxo1/Mlxipl/Elf1/Zfp523/Tcf4/Tbx21/Dbp/Ubp1/Foxk2/Gzf1/Zfp948/Gcm1/Zfp738/Glis3/Clock/Smad3/Csrnp3/Rfx5/Nfatc1/Zfp974/Foxj3/Nobox/Onecut1/Barhl1/Nfat5/Zfp639/Mybl1/Gli2/Zfp780b/Mef2b/Rax/Irx3/Zfp62/Hoxa7/Creb3l4/Arx/Ebf3/Rfx4/Gbx2/Nr2e1/Mycn/Hivep2/Nr4a2/Trp63/Klf6/Meis2/Pou4f1/Zfp677/Fosb/Foxd1/Lmx1b/Zic3/Plag1/Sohlh2/Esr2/Fos/Zic2/Sox17/…
MF	GO:0000981	DNA-binding transcription factor activity, RNA polymerase II-specific	896	-0.269191	-1.2779	0.00223865	0.0402957	0.0360643	3115	tags=28%, list=22%, signal=23%	Pou2f2/Hivep3/Zscan5b/Irf3/Grhl1/Zfp397/Thap1/Zbtb39/Crem/Usf2/Zfp597/Tef/Zfp617/Foxr1/Mxd1/Zfp7/Esr1/Tbx4/Zfp319/Zfp958/E2f7/Zfp446/Zfp513/Obox1/Zfp750/Klf16/Lmx1a/Sp9/Zfp518a/Foxc1/Evx1/Rex2/Zfp707/Zfp787/Zfp563/Zfp566/Hhex/Hif1a/Ehf/Pdx1/Zfp979/Zfp664/Sox7/Lrrfip1/Tfap2a/Zfp560/Sall2/Prdm16/Zbtb18/Pax2/Zbtb46/Foxo1/Lhx8/Mlxipl/Zkscan6/Zeb1/Bach2/Elf1/Zfp523/A430033K04Rik/Tcf7/Tcf4/Tbx21/Dbp/Ub…
MF	GO:0003700	DNA-binding transcription factor activity	940	-0.268221	-1.27408	0.00271043	0.0458008	0.0409913	3294	tags=29%, list=23%, signal=24%	Msx1/Zbtb33/Insm1/Zfp715/Zbtb38/Zfp512b/Zbtb20/Ahdc1/Zfp213/Tfap2e/Bmal1/Zfp316/Hsf2/Zfp281/Pou2f2/Hivep3/Zscan5b/Irf3/Grhl1/Ikzf4/Zfp397/Thap1/Zbtb39/Crem/Usf2/Zfp597/Tef/Zfp617/Foxr1/Mxd1/Zfp7/Esr1/Tbx4/Zfp319/Zfp958/E2f7/Zfp446/Zfp513/Obox1/Zfp750/Klf16/Lmx1a/Sp9/Zfp518a/Foxc1/Evx1/Mrtfb/Rex2/Zfp707/Zfp787/Zfp563/Zfp566/Hhex/Hif1a/Ehf/Pdx1/Zfp979/Zfp664/Sox7/Lrrfip1/Tfap2a/Zfp560/Sall2/Prdm16/…
MF	GO:0005215	transporter activity	768	0.246882	1.26245	0.00134712	0.0273339	0.0244636	1993	tags=20%, list=14%, signal=18%	Fabp3/Kcnf1/Slc29a3/Gabrd/Slc28a3/Bok/Slc39a2/Slc35d1/Slc25a21/Slc24a5/Aqp3/Asic1/Trpv5/Clic3/Cldn4/Slc7a7/Hcn2/Slc16a5/Fxyd4/Atp5mc2/Atp8a2/Slc38a4/Xkr8/Kcnk12/Tmem63a/Atp8b2/Clcn4/Gjb3/Clcn1/Abcb11/Atp2a1/Cacna2d4/Abca1/Slc38a2/Atp6v1f/Kcnn4/Grin3a/Slc45a4/Slc35d2/Slc25a1/Lasp1/Tmc6/Slc32a1/Cox7a1/Slc39a13/Gsdma/Slc29a4/Atp8b4/Chrna9/Cacna1e/Cyb561d1/Slc5a4b/Ncs1/Clcnka/Slc7a4/Slc5a5/Clic1/Sv2a…
MF	GO:0022857	transmembrane transporter activity	690	0.250326	1.26493	0.00140834	0.0280989	0.0251482	1991	tags=20%, list=14%, signal=18%	Fabp3/Kcnf1/Slc29a3/Gabrd/Slc28a3/Bok/Slc39a2/Slc35d1/Slc25a21/Slc24a5/Aqp3/Asic1/Trpv5/Clic3/Cldn4/Slc7a7/Hcn2/Slc16a5/Fxyd4/Atp5mc2/Slc38a4/Kcnk12/Tmem63a/Clcn4/Gjb3/Clcn1/Abcb11/Atp2a1/Cacna2d4/Abca1/Slc38a2/Atp6v1f/Kcnn4/Grin3a/Slc45a4/Slc35d2/Slc25a1/Lasp1/Tmc6/Slc32a1/Cox7a1/Slc39a13/Gsdma/Slc29a4/Chrna9/Cacna1e/Cyb561d1/Slc5a4b/Ncs1/Clcnka/Slc7a4/Slc5a5/Clic1/Sv2a/Bak1/Slc23a3/Slc35f6/Clca…
MF	GO:0016491	oxidoreductase activity	500	0.272643	1.34385	0.0002823	0.00792354	0.00709149	2804	tags=27%, list=20%, signal=22%	Hadh/Fdx1/Ogfod3/Loxl2/Heatr4/Alkbh3/Clic3/Sccpdh/Gfus/Aifm3/Cyba/P3h2/Decr1/Gsto1/Ppox/Akr1c21/Cyp2s1/Gulo/Pcbd2/Rdh1/Cox7a1/Hsd17b4/Cryzl1/Cyb561d1/Akr1b8/Aox2/Acadl/Cbr2/Sdr39u1/Aldh1l1/Clic1/Il4i1/Cp/Blvrb/Cyp7a1/Gstt2/Ptgr1/Gsto2/Selenon/Idh1/Cybrd1/Cyp4f13/Hmox1/Cbs/Selenow/Ptgr3/Cyp2f2/Ncf2/Pdia5/Txn1/Cyp2d9/Fdxr/Pycr2/Hadha/Tmx4/Prxl2b/Dhodh/Cyb5r1/Etfdh/Pxdn/P3h3/Hsd17b10/Cyp4x1/Steap3/A…
MF	GO:0005509	calcium ion binding	399	0.273653	1.32985	0.00263815	0.045039	0.0403095	1768	tags=21%, list=12%, signal=19%	H1f4/Nid1/Loxl2/Megf8/Myl4/Myl6b/Arsa/Cabp7/Anxa2/Hmcn2/Efcc1/Cgref1/Tgm2/Celsr3/Anxa3/Ppef2/Padi4/Pnliprp2/Atp2a1/Pla2g10/Micu3/Sncb/Anxa9/Myl12b/Cracr2b/Lrp4/Dhh/Gca/Cacna1e/Ncs1/Fbn1/Unc13a/Smoc1/Dchs1/Vsnl1/Scube1/Spock2/Adgre5/Selenon/Itgb1bp2/Plscr1/Padi1/Fkbp9/Rasgrp2/Efhd2/Egfl8/Acer3/Sri/Rcn3/Anxa11/Anxa4/Plcd1/Efemp2/Bmp1/Hmcn1/Egfl7/S100a11/Padi2/Notch3/Plcg1/Fbln2/Fstl1/Efcab2/Pdcd6/F…
MF	GO:0140098	catalytic activity, acting on RNA	338	0.279226	1.33933	0.00162167	0.0315939	0.0282762	3311	tags=25%, list=23%, signal=19%	Ddx3y/Trpt1/Alkbh3/Nynrin/Rnasel/Mblac1/Gatb/Slfn2/Dtd1/Vars1/Tars3/Pus10/Tyw3/Top3b/Rars2/Sars2/Ago4/Helz2/Ggt1/Trmo/Mov10/Dtwd1/Trmt1/Ddx25/Bud23/Pstk/Trmt9b/Mettl5/Dus1l/Apex1/Trmu/Rpusd4/Lars1/Tmt1a3/Sepsecs/Ago2/Dis3l2/Tsen34/Ddx1/Farsa/Thumpd3/Mrpl58/Aars2/Cmtr1/Rida/Tars2/Zc3h12c/Endov/Eif4a2/Mrm2/Cpsf3/Trmt11/Farsb/Trmt44/Bcdin3d/Lactb2/Eri3/Snrnp200/Dus4l/Yars2/Eif4a1/Iars2/Tars1/Pop5/Dh…
MF	GO:0005198	structural molecule activity	489	0.380468	1.88108	1.16672e-12	2.41512e-10	2.16151e-10	3059	tags=39%, list=21%, signal=32%	Mybpc2/H1f4/Nid1/Myl6b/Cldn7/Mrpl14/Col9a2/Mrpl36/Hmcn2/Cldn4/Prph/Krt7/Mrps18c/Col12a1/Rpl9-ps6/Col5a2/Rpl24/H1f3/Csrp1/Mrpl1/Fbn1/Spock2/Rpl6l/H2ac8/Pcolce2/Vwf/Krt10/Mfge8/Lad1/Mrpl47/Mrps21/Des/Hmox1/Mrps16/Mrpl33/Col18a1/Col4a1/Mfap4/Bgn/Arpc1b/Panx2/Efemp2/Hmcn1/Sntb1/H2ac13/Col3a1/H1f2/Mrpl19/Cldn9/Fbln2/Lmnb2/H2ac15/Shank3/Pxdn/Csrp2/Bsn/Mrpl23/Fn1/Col23a1/Mrps31/Rps18/H2ac4/Mylpf/Mrpl15/…
MF	GO:0140101	catalytic activity, acting on a tRNA	130	0.40558	1.7626	7.95586e-05	0.00248583	0.0022248	4329	tags=42%, list=30%, signal=29%	Trpt1/Gatb/Dtd1/Vars1/Tars3/Pus10/Tyw3/Rars2/Sars2/Ggt1/Trmo/Dtwd1/Trmt1/Pstk/Trmt9b/Dus1l/Trmu/Rpusd4/Lars1/Sepsecs/Tsen34/Farsa/Thumpd3/Mrpl58/Aars2/Tars2/Trmt11/Farsb/Trmt44/Bcdin3d/Dus4l/Yars2/Iars2/Tars1/Pop5/Alkbh8/Fto/Gars1/Mars1/Yars1/Sars1/Dtwd2/Trmt1l/Elac1/Elac2/Tarbp1/Wars2/Nsun2/Trmt10b/Pus3/Thg1l/Rpp21/Qtrt1/Tyw5
MF	GO:0016874	ligase activity	149	0.409393	1.8054	8.68713e-06	0.000517399	0.000463068	3245	tags=39%, list=23%, signal=30%	Ttll7/Ass1/Mccc2/Gatb/Nadsyn1/Acsf3/Suclg1/Vars1/Acss1/Ttll10/Lig1/Tars3/Naprt/Asns/Uba1y/Uba7/Adss1/Rars2/Sars2/Ttl/Ttll3/Pfas/Slc27a2/Mthfd1/Ghdc/Asnsd1/Lars1/Dph6/Acsl6/Mthfd1l/Farsa/Slc27a1/Atp5me/Aars2/Atp6v1a/Dip2a/Tars2/Atp5po/Hlcs/Gart/Acsf2/Atg7/Sucla2/Acacb/Farsb/Atp5pf/Yars2/Iars2/Tars1/Carns1/Acsl4/Cad/Atp5mf/Ttll6/Gars1/Mars1/Yars1/Sars1
MF	GO:0003735	structural constituent of ribosome	163	0.6288	2.82065	4.54669e-22	3.76466e-19	3.36933e-19	3336	tags=63%, list=23%, signal=49%	Mrpl14/Mrpl36/Mrps18c/Rpl9-ps6/Rpl24/Mrpl1/Rpl6l/Mrpl47/Mrps21/Mrps16/Mrpl33/Mrpl19/Mrpl23/Mrps31/Rps18/Mrpl15/Rpl13a/Rpl3/Rpl7/Rpl27/Mrpl16/Rpl9/Mrpl22/Rps6-ps4/Rpl12/Rps2/Mrpl24/Rpl37a/Rpl5/Rpl8/Rpl17/Rps3/Mrps15/Rpl38/Mrpl11/Rpl36a/Rpl22/Rpl27a/Rpl21/Rpl7a/Rps29/Rpl15/Rpl30/Mrps18b/Rps27a/Rpl29/Rps23/Rps24/Rps27/Rpl34-ps1/Rpl32/Uba52/Rpl36/Rps6/Mrpl52/Rpl35rt/Rpl10/Rps5/Rpl19/Rps16/Rpl18a/Rps1…

## Sheet: GO_set_8cKO-set_2cKO_res
Figure 1–figure supplement 2–Source Data 1. Gene Set Enrichment Analysis (GSEA) on Gene ontology (GO). GO term enrichment for DEGs identified in the four pairwise comparisons by gseGO in R package ClusterProfiler (v4.14.4).
ONTOLOGY	ID	Description	setSize	enrichmentScore	NES	pvalue	p.adjust	qvalue	rank	leading_edge	core_enrichment
BP	GO:0048593	camera-type eye morphogenesis	119	-0.537796	-1.70994	7.19569e-07	3.69139e-05	2.78991e-05	4196	tags=53%, list=29%, signal=38%	Pax2/Prdm1/Sox1/Ephb1/Lrp5/Nf1/Stat3/Casz1/Cited2/Nectin3/Nectin1/Hipk2/Ptprm/Aqp1/Sdk1/Tfap2a/Dscam/Calb1/Phactr4/Pou2f1/Fzd5/Meis1/Mfsd2a/Rpgrip1l/Ift122/Notch2/Bbs10/Arl6/Hif1a/Shroom2/Grk1/Bmp7/Naglu/Foxn4/Vsx2/Prom1/Th/Tenm3/Tdrd7/Samd7/Prox1/Ahi1/Rp1/Cfh/Sox2/Rom1/Atp8a2/Epha2/Impg2/Thrb/Ntrk2/Ephb2/Sox8/Pitx2/Thy1/Vsx1/Lhx1/Dio3/Sox4/Sox11/Tbx2/Tfap2b/Dll1
BP	GO:0048592	eye morphogenesis	143	-0.51577	-1.6633	3.37706e-06	0.000123745	9.3525e-05	4458	tags=51%, list=31%, signal=36%	Pax2/Prdm1/Sox1/Ppp2r3a/Ephb1/Lrp5/Nf1/Stat3/Casz1/Cited2/Nectin3/Nectin1/Hipk2/Ptprm/Aqp1/Sdk1/Tfap2a/Dscam/Agtpbp1/Calb1/Phactr4/Pou2f1/Fzd5/Meis1/Mfsd2a/Rpgrip1l/Ift122/Pdgfb/Notch2/Bbs10/Arl6/Hif1a/Shroom2/Col5a2/Tmem215/Grk1/Bmp7/Fbn2/Naglu/Foxn4/Vsx2/Prom1/Th/Tenm3/Tdrd7/Samd7/Prox1/Gas1/Ahi1/Rp1/Cfh/Sox2/Rom1/Atp8a2/Epha2/Impg2/Thrb/Nr2e3/Ntrk2/Ephb2/Sox8/Pitx2/Thy1/Vsx1/Lhx1/Dio3/Sox4/Rar…
BP	GO:0030326	embryonic limb morphogenesis	113	-0.514701	-1.63052	1.43169e-05	0.000415729	0.000314203	3732	tags=46%, list=26%, signal=35%	Fgf8/Gna12/Gja5/Fgf9/Gnas/Tfap2a/Aff3/Mbnl1/Prrx1/Acd/Prickle1/C2cd3/Hnf1a/Lmx1b/Hoxd9/Chst11/B9d1/Rpgrip1l/Tbx4/Ift122/Notch2/Rspo2/Fbxw4/Bmp7/Tgfb2/Tulp3/Fras1/Tmem107/Pbx1/Fbn2/Sfrp2/Pbx2/Trp63/Ece1/Crabp2/Ror2/Gas1/Gli2/Shh/Hoxd13/Alx1/Runx2/Tbc1d32/Msx1/Pitx2/Shox2/Osr2/Zbtb16/Sp9/Rarb/Prrx2/Tbx2
BP	GO:0035113	embryonic appendage morphogenesis	113	-0.514701	-1.63052	1.43169e-05	0.000415729	0.000314203	3732	tags=46%, list=26%, signal=35%	Fgf8/Gna12/Gja5/Fgf9/Gnas/Tfap2a/Aff3/Mbnl1/Prrx1/Acd/Prickle1/C2cd3/Hnf1a/Lmx1b/Hoxd9/Chst11/B9d1/Rpgrip1l/Tbx4/Ift122/Notch2/Rspo2/Fbxw4/Bmp7/Tgfb2/Tulp3/Fras1/Tmem107/Pbx1/Fbn2/Sfrp2/Pbx2/Trp63/Ece1/Crabp2/Ror2/Gas1/Gli2/Shh/Hoxd13/Alx1/Runx2/Tbc1d32/Msx1/Pitx2/Shox2/Osr2/Zbtb16/Sp9/Rarb/Prrx2/Tbx2
BP	GO:0042471	ear morphogenesis	105	-0.504835	-1.59187	0.000171481	0.00290011	0.00219187	4227	tags=48%, list=29%, signal=34%	Eya1/Cthrc1/Myo7a/Lrig1/Sparc/Fzd3/Pax8/Fgf8/Lhfpl5/Fgf9/Tfap2a/Insig1/Prrx1/Enpp1/Gbx2/Zic3/Triobp/Otx1/Ttc39c/Nherf1/Strc/Naglu/Pcdh15/Fgf10/Mapk3/Gata2/Ror2/Gas1/Mafb/Gsc/Ankrd24/Stox1/Six1/Sox2/Kcnq4/Atp8a2/Gli2/Itga8/Ptprq/Hesx1/Ephb2/Msx1/Osr2/Col2a1/Eya4/Ntn1/Prrx2/Tbx2/Dll1/Fzd2
BP	GO:0035107	appendage morphogenesis	144	-0.501373	-1.61801	9.87417e-06	0.00031013	0.000234392	3864	tags=46%, list=27%, signal=34%	Ttbk2/Sema3c/Fgf8/Gna12/Gja5/Fgf9/Gnas/Tfap2a/Aff3/Mbnl1/Prrx1/Errfi1/Acd/Enpp1/Prickle1/Sall3/C2cd3/Hnf1a/Pcsk5/Lmx1b/Hoxd9/Chst11/B9d1/Rpgrip1l/Tbx4/Ift122/Zic3/Notch2/Rspo2/Fbxw4/Bmp7/Tgfb2/Tulp3/Fras1/Tmem107/Pbx1/Npr2/Fbn2/Sfrp2/Pbx2/Trp63/Ece1/Fgf10/Crabp2/Ror2/Gas1/Sulf1/Gli2/Shh/Hoxd13/Cibar1/Alx1/Runx2/Ark2c/Tbc1d32/Msx1/Pitx2/Shox2/Osr2/Col2a1/Zbtb16/Sp9/Rarb/Prrx2/Tbx2/Tfap2b
BP	GO:0035108	limb morphogenesis	144	-0.501373	-1.61801	9.87417e-06	0.00031013	0.000234392	3864	tags=46%, list=27%, signal=34%	Ttbk2/Sema3c/Fgf8/Gna12/Gja5/Fgf9/Gnas/Tfap2a/Aff3/Mbnl1/Prrx1/Errfi1/Acd/Enpp1/Prickle1/Sall3/C2cd3/Hnf1a/Pcsk5/Lmx1b/Hoxd9/Chst11/B9d1/Rpgrip1l/Tbx4/Ift122/Zic3/Notch2/Rspo2/Fbxw4/Bmp7/Tgfb2/Tulp3/Fras1/Tmem107/Pbx1/Npr2/Fbn2/Sfrp2/Pbx2/Trp63/Ece1/Fgf10/Crabp2/Ror2/Gas1/Sulf1/Gli2/Shh/Hoxd13/Cibar1/Alx1/Runx2/Ark2c/Tbc1d32/Msx1/Pitx2/Shox2/Osr2/Col2a1/Zbtb16/Sp9/Rarb/Prrx2/Tbx2/Tfap2b
BP	GO:0097485	neuron projection guidance	195	-0.500268	-1.64761	4.30406e-07	2.4658e-05	1.86362e-05	4730	tags=56%, list=32%, signal=39%	Apbb1/Lama2/Lgr4/Cntn6/Mycbp2/Hspg2/Robo1/Dcc/Trio/Gfra3/Epha3/Efnb2/Unc5c/Sema5b/Ephb1/Plxna1/Cdh4/Ext1/Tubb3/Sema4d/Slit3/Lamc3/Cdk5r1/Neo1/Fzd3/Megf9/Rac3/Sema3c/Nectin1/Prtg/Nexn/Fgf8/Draxin/Ptprm/Flot1/Mapk8ip3/Lama1/Nell2/Sema6a/Plxna4/Efna4/Ngfr/Dscam/Dag1/Arx/Gbx2/Lrp1/Bmpr2/Sema4b/Bmpr1b/Kif5c/Nfib/Tubb2b/Cdk5r2/Nrcam/Efnb1/Dpysl5/Kif21a/Lmx1a/Ntn4/Bmp7/Ntn3/Ryk/Tgfb2/Foxd1/Sema3e/Evl/Lh…
BP	GO:0090596	sensory organ morphogenesis	238	-0.499594	-1.65503	2.16764e-08	1.96236e-06	1.48313e-06	4227	tags=47%, list=29%, signal=34%	Eya1/Cthrc1/Ephb1/Lrp5/Nf1/Myo7a/Stat3/Casz1/Lrig1/Sparc/Fzd3/Cited2/Pax8/Nectin3/Nectin1/Fgf8/Hipk2/Lhfpl5/Ptprm/Fgf9/Aqp1/Sdk1/Tfap2a/Dscam/Agtpbp1/Insig1/Prrx1/Enpp1/Gbx2/Calb1/Phactr4/Pou2f1/Fzd5/Meis1/Mfsd2a/Rpgrip1l/Ift122/Pdgfb/Zic3/Triobp/Notch2/Bbs10/Arl6/Hif1a/Shroom2/Col5a2/Otx1/Tmem215/Ttc39c/Grk1/Bmp7/Nherf1/Strc/Fbn2/Naglu/Foxn4/Vsx2/Prom1/Pcdh15/Th/Fgf10/Mapk3/Tenm3/Tdrd7/Samd7/Pro…
BP	GO:0007411	axon guidance	194	-0.499488	-1.64518	2.26867e-07	1.45478e-05	1.09951e-05	4730	tags=56%, list=32%, signal=38%	Apbb1/Lama2/Lgr4/Cntn6/Mycbp2/Hspg2/Robo1/Dcc/Trio/Gfra3/Epha3/Efnb2/Unc5c/Sema5b/Ephb1/Cdh4/Ext1/Tubb3/Sema4d/Slit3/Lamc3/Cdk5r1/Neo1/Fzd3/Megf9/Rac3/Sema3c/Nectin1/Prtg/Nexn/Fgf8/Draxin/Ptprm/Flot1/Mapk8ip3/Lama1/Nell2/Sema6a/Plxna4/Efna4/Ngfr/Dscam/Dag1/Arx/Gbx2/Lrp1/Bmpr2/Sema4b/Bmpr1b/Kif5c/Nfib/Tubb2b/Cdk5r2/Nrcam/Efnb1/Dpysl5/Kif21a/Lmx1a/Ntn4/Bmp7/Ntn3/Ryk/Tgfb2/Foxd1/Sema3e/Evl/Lhx2/Sema…
BP	GO:0007188	adenylate cyclase-modulating G protein-coupled receptor signaling pathway	118	-0.493312	-1.5683	0.000131817	0.0023318	0.00176235	4226	tags=54%, list=29%, signal=39%	Gnai2/Aplp1/Galr3/Rapgef2/Gsk3a/Ramp1/Atp2b4/Nos1/Ptger3/Gna12/Htr7/Pde10a/Gnao1/Gipr/Akap5/Adgrl2/Ptger4/Gnas/Adrb3/Adm/Arrdc3/Tbxa2r/Adgre4/Prkaca/Itgb3/Ramp3/Gna14/Pde3a/Gnaz/Grm2/Rapgef4/Adcy8/Nherf1/Prkar2b/Prkar1b/Rgs2/Htr5b/Htr5a/Gnai1/S1pr3/Adgrb2/Tcp11/Gabbr1/Lpar2/Chrm3/Adgrg1/Calcrl/Adgrl3/Tmem116/Pde4d/Gnal/Grm8/Adcy5/Adgrf5/Rit2/Adcyap1r1/Adcy7/Adra2b/Cort/Gpr146/Grm6/Chrm4/Adgrg5/Ad…
BP	GO:0048565	digestive tract development	107	-0.490232	-1.5474	0.000298092	0.00463398	0.00350231	3253	tags=41%, list=22%, signal=32%	Nkx2-3/Epb41l5/Smad3/Src/Pcsk5/Fzd5/Pdx1/Tlr9/Cdx2/Zic3/Il6st/Kit/Hif1a/Rb1/Percc1/Tcf7/Tgfb2/Npr2/Spdef/Sfrp2/Trp63/Rcbtb2/Wnt11/Fgf10/Myocd/Fat4/Hnf1b/Gsdmc2/Gli2/Shh/Ada/Trp73/Hoxd13/Sox17/Chrd/Dchs1/Cps1/Pitx2/Shox2/C1galt1/Ascl1/Egfr/Rarb/Sox11
BP	GO:0009952	anterior/posterior pattern specification	160	-0.48796	-1.58825	3.4691e-05	0.000808257	0.000610871	4191	tags=46%, list=29%, signal=33%	Lrp5/Apc/Sfrp1/Tgfbr1/Nckap1/Wt1/Sema3c/Tdrd1/Fgf8/Hipk2/Cobl/Axin2/Ctnnbip1/Ssbp3/Epb41l5/Pax3/Smad3/Gbx2/Bmpr2/Prickle1/Pcsk5/Fzd5/Nrarp/Mesp2/Hoxd9/Foxc2/Cdx2/Bhlhe40/Hhex/Zic3/Hey1/Wnt2b/Wls/Otx1/Pcdh8/Helt/Tulp3/Pbx1/Tbx6/Sfrp2/Bmi1/Mllt3/Hoxb4/Hes6/Meox2/Tdrd7/Tcf7l1/Ror2/Ets2/Hoxb2/Hnf1b/Hoxa7/Gli2/Shh/Btg2/Celsr2/Hoxd8/Hoxd13/Sox17/Arc/Tdrd6/Pld6/Alx1/Barx1/Msx1/Bhlhe41/Lhx1/Lfng/Zbtb16/H…
BP	GO:1903038	negative regulation of leukocyte cell-cell adhesion	101	-0.487124	-1.53226	0.000610272	0.00789251	0.00596506	2895	tags=37%, list=20%, signal=30%	Hspb1/Pde5a/Nrarp/Gnrh1/Smad7/Tarm1/Cd74/Socs5/Btn2a2/Il2ra/Slc4a2/Socs6/Prdx2/Cblb/Lag3/Gstp1/Irf1/Mdk/Bcl6/Cxcl12/Ildr2/Zfp608/Foxj1/Lrrc32/Anxa1/Adam8/Socs1/Cd274/Shh/Il20rb/Pla2g5/Spn/Zc3h12d/Ppara/Ccl28/Laptm5/Gpnmb
BP	GO:0051250	negative regulation of lymphocyte activation	116	-0.485632	-1.54379	0.000449236	0.00628523	0.0047503	2895	tags=35%, list=20%, signal=29%	Hspb1/Pde5a/Nrarp/Gnrh1/Mill1/Pglyrp2/Smad7/Parp3/Tarm1/Tbc1d10c/Cd74/Rassf5/Socs5/Btn2a2/Il2ra/Axl/Slc4a2/Socs6/Prdx2/Cblb/Lag3/Irf1/Mdk/Rhbdd3/Bcl6/Ildr2/Zfp608/Foxj1/Lrrc32/Anxa1/Socs1/Cd274/Shh/Il20rb/Flt3/Pla2g5/Spn/Zc3h12d/Laptm5/Sox11/Gpnmb
BP	GO:0072073	kidney epithelium development	121	-0.482445	-1.53561	0.000338999	0.0050726	0.00383381	4720	tags=55%, list=32%, signal=37%	Klhl3/Lgr4/Npnt/Arg2/Pax2/Smad1/Hs3st3b1/Efnb2/Eya1/Sdc4/Sfrp1/Smad6/Ext1/Acat1/Wt1/Pax8/Fgf8/Basp1/Aqp1/Ctnnbip1/Myo1e/Mtss1/Smad9/Smad3/Calb1/Cat/Sdc1/Foxc2/Aqp11/Pdgfb/Bmper/Hey1/Notch2/Smad7/Rara/Wnt2b/Hs2st1/Smad5/Bmp7/Foxd1/Pbx1/Crlf1/Prom1/Wnt11/Irx1/Kif26b/Agtr1a/Foxj1/Spry1/Slit2/Fat4/Hnf1b/Six1/Wnt7b/Shh/Irx3/Pou3f3/Sox8/Dchs1/Ptpro/Lhx1/Klf15/Rarb/Tfap2b/Irx2/Dll1
BP	GO:0007219	Notch signaling pathway	144	-0.481748	-1.55468	9.26779e-05	0.00176088	0.00133085	3211	tags=37%, list=22%, signal=29%	Anxa4/Neurl1a/Src/Enho/Sorbs2/Acvrl1/Cdh6/Nrarp/Tspan5/Bmp2k/Mesp2/Foxc2/Cdkn1b/Hhex/Hey1/Notch2/Il6st/Kit/Dner/Il2ra/Bmp7/Tgfb2/Snai2/Cdk6/Trp63/Cntn1/Aph1c/Dtx3/Fgf10/Bcl6/S1pr3/Gata2/Onecut1/Bend6/Mfng/Fat4/Hnf1b/Postn/Six1/Prag1/Sox2/Notch3/Dlx2/Dtx4/Dlk2/Tspan15/Zfp423/Lfng/Ascl1/Hey2/Tbx2/Chac1/Dll1
BP	GO:0048736	appendage development	176	-0.478801	-1.57096	3.62376e-05	0.000808257	0.000610871	3864	tags=43%, list=27%, signal=32%	Ttbk2/Sema3c/Fgf8/Gna12/Itga6/Gja5/Fgf9/Gnas/Tfap2a/Aff3/Rax/Mbnl1/Prrx1/Errfi1/Acd/Enpp1/Slc7a11/Bmpr2/Prickle1/Sall3/C2cd3/Hnf1a/Pcsk5/Lmx1b/Hoxd9/Chst11/B9d1/Rpgrip1l/Tbx4/Ift122/Zic3/Notch2/Rara/Rspo2/Fbxw4/Bmp7/Bbs7/Tgfb2/Tulp3/Fras1/Tmem107/Pbx1/Npr2/Fbn2/Naglu/Sfrp2/Pbx2/Trp63/Ece1/Fgf10/Meox2/Crabp2/Ror2/Ift80/Gas1/Sulf1/Gli2/Shh/Hoxd13/Cibar1/Alx1/Runx2/Ark2c/Tbc1d32/Msx1/Pitx2/Shox2/Osr…
BP	GO:0060173	limb development	176	-0.478801	-1.57096	3.62376e-05	0.000808257	0.000610871	3864	tags=43%, list=27%, signal=32%	Ttbk2/Sema3c/Fgf8/Gna12/Itga6/Gja5/Fgf9/Gnas/Tfap2a/Aff3/Rax/Mbnl1/Prrx1/Errfi1/Acd/Enpp1/Slc7a11/Bmpr2/Prickle1/Sall3/C2cd3/Hnf1a/Pcsk5/Lmx1b/Hoxd9/Chst11/B9d1/Rpgrip1l/Tbx4/Ift122/Zic3/Notch2/Rara/Rspo2/Fbxw4/Bmp7/Bbs7/Tgfb2/Tulp3/Fras1/Tmem107/Pbx1/Npr2/Fbn2/Naglu/Sfrp2/Pbx2/Trp63/Ece1/Fgf10/Meox2/Crabp2/Ror2/Ift80/Gas1/Sulf1/Gli2/Shh/Hoxd13/Cibar1/Alx1/Runx2/Ark2c/Tbc1d32/Msx1/Pitx2/Shox2/Osr…
BP	GO:0055123	digestive system development	119	-0.478787	-1.52232	0.000315938	0.00481414	0.00363847	3545	tags=43%, list=24%, signal=33%	Cobl/Fgf9/Igf1r/Nkx2-3/Epb41l5/Smad3/Src/Pcsk5/Fzd5/Pdx1/Tlr9/Cdx2/Zic3/Il6st/Kit/Hif1a/Rb1/Wls/Percc1/Tcf7/Tgfb2/Npr2/Spdef/Sfrp2/Trp63/Rcbtb2/Igf2/Wnt11/Fgf10/Myocd/Fat4/Hnf1b/Gsdmc2/Gli2/Shh/Ada/Trp73/Hoxd13/Sox17/Barx1/Chrd/Dchs1/Cps1/Pitx2/Shox2/C1galt1/Insr/Ascl1/Egfr/Rarb/Sox11
BP	GO:0048562	embryonic organ morphogenesis	241	-0.477269	-1.58048	4.64032e-07	2.4658e-05	1.86362e-05	4261	tags=45%, list=29%, signal=32%	Gli1/Eya1/Cthrc1/Myo7a/Tgfbr1/Id2/Nckap1/Rbpms2/Lrig1/Sufu/Sparc/Fzd3/Cited2/Pax8/Fgf8/Rnf207/Hipk2/Lhfpl5/Fgf9/Mmp16/Stil/Gnas/Tfap2a/Smad3/Insig1/Prrx1/Enpp1/Gbx2/Phactr4/C2cd3/Fzd5/Acvr1/Hoxd9/Chst11/Foxc2/Ift122/Zic3/Triobp/Eif4a3l1/Notch2/Hif1a/Otx1/Tcf7/Ttc39c/Bmp7/Tgfb2/Tulp3/Nherf1/Strc/Fbn2/Naglu/Foxn4/Tbx6/Bmi1/Men1/Pcdh15/Asb2/Th/Hoxb4/Wnt11/Fgf10/Mapk3/Prox1/Gata2/Ror2/Gas1/Lbx1/Mafb/…
BP	GO:0060041	retina development in camera-type eye	149	-0.474438	-1.53513	7.76605e-05	0.00151291	0.00114344	5305	tags=60%, list=36%, signal=38%	Mertk/Cdon/Alms1/Slc4a7/Lrp6/Clic4/Mfrp/Fat3/Fzd4/Ski/Uchl3/Slc4a5/Bbs1/Max/Man2a1/Large1/Pax2/Prdm1/Fos/Lrp5/Apc/Stat3/Casz1/Lamc3/Atp2b4/Nectin3/Nectin1/Elp6/Slc38a8/Hipk2/Tub/Ptprm/Gnb1/Crx/Sdk1/Lama1/Dscam/Agtpbp1/Bmpr2/Calb1/Bmpr1b/Acvrl1/Nfib/Mdm1/Mfsd2a/Rpgrip1l/Pdgfb/Bbs10/Arl6/Hif1a/Grk1/Tgfb2/Lhx2/Naglu/Foxn4/Vsx2/Prom1/Tmem135/Arsg/Col4a1/Samd7/Prox1/Gpm6a/Nphp4/Nr2e1/Ahi1/Rp1/Cfh/Sox2…
BP	GO:0006813	potassium ion transport	145	-0.474047	-1.53001	0.00028251	0.0044823	0.00338767	3855	tags=41%, list=26%, signal=31%	Slc1a3/Nos1/Ptger3/Rnf207/Gja5/Tmem175/Alg10b/Aqp1/Prnp/Akap5/Bin1/Kcnk13/Casq2/Slc12a8/Kcnd3/Akap6/Atp1a3/Kcna7/Kcnab1/Fxyd6/Slc24a3/Cdkn1b/Kcnj10/Slc17a7/Dpp6/Kcnh1/Gck/Kcnk12/Kcnk1/Vamp2/Kcnk18/Kcnk2/Lrrc26/Slc9a6/Kcnb2/Kcnv2/Kcne3/Slc9a3/Ank2/Ptk2b/Slc12a5/Gnb2/Slc9a4/Kcnq4/Kcnmb2/Amigo1/Lrrc55/Cnga4/Kcng4/Kcne1/Kcnmb3/Kcnu1/Dpp10/Slc24a2/Kcnh5/Kcna1/Kcnq5/Cnga2/Kcnh2/Hcrt
BP	GO:0021953	central nervous system neuron differentiation	169	-0.472003	-1.54359	4.30655e-05	0.000920526	0.000695722	4528	tags=46%, list=31%, signal=32%	Robo1/Crkl/Dcc/B4galt5/Adarb1/Sox1/Disc1/B2m/Ephb1/Plxna1/Sfrp1/Rapgef2/D16Ertd472e/Sufu/Scyl2/Rac3/Gdpd5/Rora/Fgf8/Draxin/Ptger3/Wdr47/Crk/Pals1/Tfap2a/Plxna4/B4galt6/Agtpbp1/Pax3/Arx/Gbx2/Bmpr1b/Sall3/Brinp2/Nfib/Lmx1b/Spock1/Arhgef28/Nanos1/Lmx1a/Pou4f1/Ryk/Dclk2/Sema3e/Tulp3/Foxn4/Sfrp2/Id4/Cdk5/Foxp2/Tbr1/Slc4a10/Bcl11b/Atf5/Cbln1/Prox1/Gata2/Lbx1/Lhx8/Slit2/Nr2e1/Sox2/Dlx2/Zc4h2/Gli2/Shh/Bt…
BP	GO:0002695	negative regulation of leukocyte activation	133	-0.461561	-1.47949	0.000402755	0.00579289	0.0043782	2895	tags=35%, list=20%, signal=28%	Hspb1/Cd200/Pde5a/Nrarp/Gnrh1/Mill1/Pglyrp2/Smad7/Parp3/Tarm1/Tbc1d10c/Cd74/Syt11/Rassf5/Socs5/Btn2a2/Il2ra/Zbtb46/Axl/Slc4a2/Socs6/Prdx2/Cblb/Lag3/Irf1/Mdk/Rhbdd3/Bcl6/Ildr2/Zfp608/Foxj1/Lrrc32/Anxa1/Socs1/Cd274/Shh/Adgrf5/Il20rb/Flt3/Pla2g5/Spn/Zc3h12d/Cd300lf/Laptm5/Sox11/Gpnmb
BP	GO:0043583	ear development	196	-0.461054	-1.51959	1.88495e-05	0.000500162	0.000378016	3087	tags=34%, list=21%, signal=27%	Insig1/Prrx1/Enpp1/Gbx2/Calb1/Ush2a/Cdkn1b/Rpgrip1l/Zic3/Triobp/Bmper/Hey1/Shroom2/Otx1/H2-DMa/Ttc39c/Cebpd/Gjb2/Otogl/Tgfb2/Nherf1/Kcnk2/Strc/Naglu/Ece1/Pcdh15/Fgf10/Mapk3/Prox1/Gata2/Ror2/Gas1/Gsdme/Mafb/Gsc/Ankrd24/Stox1/Fat4/Adgrv1/Six1/Ror1/Sox2/Kcnq4/Atp8a2/Gli2/Slc26a5/Shh/Itga8/Ptprq/Hesx1/C1qb/Nfix/Ephb2/Hpca/Msx1/Dchs1/Osr2/Bmp5/Col2a1/Eya4/Ntn1/Hey2/Prrx2/Tbx2/Dll1/Fzd2
BP	GO:0030178	negative regulation of Wnt signaling pathway	131	-0.460587	-1.47452	0.00107024	0.0123842	0.00935982	4570	tags=47%, list=31%, signal=33%	Nkd1/Tnn/Alpk2/Ubac2/Apc2/Foxo3/Ppp2r3a/Tle5/Gli1/Cthrc1/Apc/Sfrp1/Tle1/Gsk3a/Dab2/Scyl2/Draxin/Mcc/Fgf9/Bicc1/Axin2/Ctnnbip1/Ankrd6/Amfr/Tle2/Sost/Lrp1/Nkd2/Prickle1/Cdh2/Tmem170b/Limd1/Dact3/Amer1/Foxo1/Trabd2b/Lect2/Snai2/Nherf1/Invs/Sfrp2/Siah2/Mllt3/Mdk/Wnt11/Cyld/Ror2/Ift80/Nphp4/Gsc/Dkkl1/Sox2/Rbms3/Shh/Apcdd1/Sox17/Grb10/Barx1/Ptpro/Shisa2/Rnf43/Egr1
BP	GO:0090090	negative regulation of canonical Wnt signaling pathway	105	-0.460215	-1.45117	0.00494481	0.0362384	0.0273885	4570	tags=48%, list=31%, signal=33%	Nkd1/Tnn/Ubac2/Apc2/Foxo3/Ppp2r3a/Tle5/Gli1/Cthrc1/Apc/Sfrp1/Tle1/Gsk3a/Dab2/Scyl2/Draxin/Mcc/Bicc1/Axin2/Ctnnbip1/Ankrd6/Amfr/Tle2/Sost/Nkd2/Prickle1/Cdh2/Tmem170b/Limd1/Dact3/Amer1/Foxo1/Snai2/Nherf1/Invs/Sfrp2/Siah2/Mllt3/Mdk/Wnt11/Cyld/Ror2/Nphp4/Dkkl1/Sox2/Rbms3/Shh/Sox17/Ptpro/Egr1
BP	GO:0021782	glial cell development	112	-0.459648	-1.45451	0.00306122	0.027076	0.0204637	3231	tags=37%, list=22%, signal=29%	B4galt6/Cntnap1/Akt1/Dag1/Enpp1/Lrp1/Ncmap/Pard3/Cspg5/Ppp3r1/Kcnj10/Pdgfb/Vim/Pou3f1/Gfap/Dhh/Naglu/Gstp1/Id4/Cntn1/Cdk5/Mdk/Fa2h/Mapk3/Sh3tc2/Hdac11/Ror2/Wasf3/Ror1/Tenm4/Shh/Ntrk2/Nrros/Nfix/Arhgef10/Mal/Ascl1/Sox4/Egfr/Sox11/Dll1
BP	GO:0035270	endocrine system development	103	-0.459015	-1.44507	0.00571712	0.0405468	0.0306448	4261	tags=48%, list=29%, signal=34%	Gli1/Nf1/Tgfbr1/Wt1/Cited2/Pax8/Fgf8/Hipk2/Raf1/Gipr/Igf1r/Onecut2/Bmp6/Smad3/Cdh2/Insm1/Clock/Pdx1/Nr3c1/Arid5b/Pde3b/Hhex/Bmal1/Pbx1/Cdk6/Men1/Mdk/Wnt11/Fgf10/Mapk3/Cftr/Gata2/Onecut1/Hmga1/Hnf1b/Six1/Sox2/Gli2/Shh/Hesx1/Pitx2/Bmp5/Gcm2/Tbx19/Insr/Myt1/Ascl1/Sox4/Dll1
BP	GO:0071805	potassium ion transmembrane transport	124	-0.45763	-1.45734	0.0039554	0.031705	0.0239622	3710	tags=40%, list=25%, signal=30%	Ptger3/Rnf207/Tmem175/Alg10b/Aqp1/Prnp/Bin1/Kcnk13/Casq2/Slc12a8/Kcnd3/Akap6/Atp1a3/Kcna7/Kcnab1/Slc24a3/Kcnj10/Slc17a7/Dpp6/Kcnh1/Kcnk12/Kcnk1/Vamp2/Kcnk18/Kcnk2/Lrrc26/Slc9a6/Kcnb2/Kcnv2/Kcne3/Slc9a3/Ank2/Slc12a5/Gnb2/Slc9a4/Kcnq4/Kcnmb2/Amigo1/Lrrc55/Kcng4/Kcne1/Kcnu1/Dpp10/Slc24a2/Kcnh5/Kcna1/Kcnq5/Cnga2/Kcnh2
BP	GO:0003002	regionalization	321	-0.456587	-1.5262	2.8171e-07	1.73421e-05	1.31069e-05	3158	tags=36%, list=22%, signal=29%	Epb41l5/Pax3/Smad3/Acd/Gbx2/Bmpr2/Bmpr1b/Prickle1/C2cd3/Fbxl15/Acvrl1/Pcsk5/Lmx1b/Fzd5/Nrarp/Mapk8/Acvr1/Mesp2/Hoxd9/Foxc2/Cdx2/Bhlhe40/Rpgrip1l/Chsy1/Ift122/Hhex/Zic3/Hey1/Notch2/Cc2d2a/Wnt2b/Hif1a/Dand5/Wls/Otx1/Pcdh8/Aida/Helt/Foxd1/Tulp3/Tmem107/Pbx1/Lhx2/Invs/Foxn4/Tbx6/Sfrp2/Bmi1/Pbx2/Trp63/Zic2/Mllt3/Tbr1/Asb2/Hoxb4/Wnt11/Hes6/Fgf10/Irx1/Meox2/Tdrd7/Tcf7l1/Ror2/Foxj1/Gas1/Lbx1/Mafb/Ets2/Sp…
BP	GO:0007389	pattern specification process	358	-0.456155	-1.52884	1.16978e-07	9.47526e-06	7.16129e-06	3110	tags=47%, list=21%, signal=38%	Rab23/Dop1b/Kif3a/Robo1/Crkl/Lef1/Pax2/Scmh1/Smad1/Apc2/Sox1/Dnah11/Ppp2r3a/Gli1/Eya1/Lrp5/Apc/Snai1/Sfrp1/Smad6/Ext1/Tgfbr1/Nckap1/Rttn/Wt1/Sufu/Rnf220/Cited2/Sema3c/Pax8/Tdrd1/Fgf8/Rnf207/Hipk2/Cobl/Bicc1/Axin2/Ctnnbip1/Stil/Tfap2a/Ssbp3/Rax/Epb41l5/Pax3/Smad3/Acd/Gbx2/Bmpr2/Bmpr1b/Prickle1/C2cd3/Fbxl15/Acvrl1/Pcsk5/Lmx1b/Fzd5/Nrarp/Mapk8/Acvr1/Meis1/Mesp2/Hoxd9/Foxc2/Cdx2/Ooep/Bhlhe40/Efnb1/Rp…
BP	GO:0060840	artery development	101	-0.454671	-1.43018	0.00556002	0.0399854	0.0302205	4254	tags=44%, list=29%, signal=31%	Efnb2/Eya1/Nf1/Smad6/Tgfbr1/Comp/Gla/Sufu/Cited2/Fgf8/Gja5/Ptger4/Ngfr/Prrx1/Enpp1/Lrp1/Bmpr2/Prickle1/Acvrl1/Foxc2/Mexis/Adamts6/Hey1/Smad7/Ltbp1/Tgfb2/Efemp2/Naglu/Ephb4/Mdk/Wnt11/Prox1/Myocd/Six1/Notch3/Shh/Adgrf5/Chrd/Nrp1/Hey2/Sox4/Prrx2/Tbx2/Tfap2b
BP	GO:2001236	regulation of extrinsic apoptotic signaling pathway	135	-0.452366	-1.45195	0.000901089	0.0110062	0.00831833	4280	tags=44%, list=29%, signal=32%	Fem1b/Eya1/Nf1/Rela/Sfrp1/Hyal2/Tgfbr1/Phip/Dbh/Dab2/Bid/Itga6/Klf4/Raf1/Nol3/Tmbim1/Bcl2l10/Ripk1/Src/Zmynd11/Fyn/Bmpr1b/Tnfrsf22/Ppp2r1b/Gclc/Acvr1/Madd/Gclm/Hmox1/Trps1/Sh3rf1/Tgfb2/Tmc8/Snai2/Prdx2/Gstp1/Sfrp2/Grina/Siah2/Map2k5/Fgf10/Sp100/Cyld/Gas1/Il7/Scg2/Eya2/Atf3/Tnfsf10/Agap2/Pak5/Itprip/Casp8/Pmaip1/Stradb/Col2a1/Eya4/Nrp1/Mal/Lta
BP	GO:1903169	regulation of calcium ion transmembrane transport	125	-0.452246	-1.44148	0.00219289	0.0211065	0.015952	3914	tags=40%, list=27%, signal=30%	Dbi/Camk2d/Ptger3/Myo5a/Prnp/Akap5/Bin1/Nol3/Casq2/Cacnb3/F2/Akt1/Nipsnap2/Fyn/Akap6/Prkd1/G6pdx/Ppp3r1/Tlr9/Ubash3b/Itgb3/Ahr/Hspa2/Tgfb2/Gpr35/Fkbp1b/Ank2/Gstm7/Ptk2b/Ehd3/Agtr1a/Mcub/Smim6/Pde4d/Gnb5/Npsr1/Jph3/Ntsr1/Adcyap1r1/Atp2a1/Stac3/Hpca/Grm6/Tspan13/Thy1/Sri/Ms4a1/Cd19/Tmc2/Cacna2d1
BP	GO:0070665	positive regulation of leukocyte proliferation	102	-0.451948	-1.4216	0.00677724	0.0471953	0.0356697	2662	tags=34%, list=18%, signal=28%	Tlr9/Efnb1/Cd55/Slc7a1/Il6st/Kit/Cd74/Jak2/Il2ra/Csf1/Kitl/Bmi1/Spta1/Igf2/Fgf10/Mapk3/Bcl6/Anxa1/Il7/Il12b/Ticam1/Icosl/Tirap/Cd274/St6gal1/Shh/Ada/Spn/Tnfrsf13c/Ephb2/Aif1/Igfbp2/Ighm/Mpl/Prlr
BP	GO:0071772	response to BMP	120	-0.451469	-1.43677	0.00330738	0.0284701	0.0215173	4148	tags=48%, list=28%, signal=34%	Sfrp1/Smad6/Smurf2/Ext1/Rbpms2/Comp/Neo1/Scube3/Usp15/Hipk2/Id1/Ngly1/Sorl1/Bmp6/Smad9/Sost/Adamts7/Smpd3/Bmpr2/Kcnd3/Bmpr1b/Fbxl15/Spart/Acvrl1/Acvr1/Bmper/Notch2/Smad7/Dand5/Crim1/Smad5/Bmp7/Tob1/Chrdl2/Foxd1/Kcp/Tmem53/Sfrp2/Tgfbr3/Mapk3/Ror2/Sulf1/Rgma/Fstl1/Chrdl1/Nfix/Runx2/Ark2c/Chrd/Msx1/Bmp5/Col2a1/Zfp423/Vwc2/Sox11/Tfap2b/Egr1
BP	GO:0071773	cellular response to BMP stimulus	120	-0.451469	-1.43677	0.00330738	0.0284701	0.0215173	4148	tags=48%, list=28%, signal=34%	Sfrp1/Smad6/Smurf2/Ext1/Rbpms2/Comp/Neo1/Scube3/Usp15/Hipk2/Id1/Ngly1/Sorl1/Bmp6/Smad9/Sost/Adamts7/Smpd3/Bmpr2/Kcnd3/Bmpr1b/Fbxl15/Spart/Acvrl1/Acvr1/Bmper/Notch2/Smad7/Dand5/Crim1/Smad5/Bmp7/Tob1/Chrdl2/Foxd1/Kcp/Tmem53/Sfrp2/Tgfbr3/Mapk3/Ror2/Sulf1/Rgma/Fstl1/Chrdl1/Nfix/Runx2/Ark2c/Chrd/Msx1/Bmp5/Col2a1/Zfp423/Vwc2/Sox11/Tfap2b/Egr1
BP	GO:0007043	cell-cell junction assembly	111	-0.450085	-1.42221	0.00381631	0.0310203	0.0234448	3693	tags=43%, list=25%, signal=33%	Snai1/Cdh4/Rab13/Epb41l3/Cldn15/Gja5/Marveld2/Pkp4/Wdr1/Cntnap1/Zfp703/Mpdz/Cdh15/Esam/Cdh17/Cdh18/Cdh2/Pard3/Acvrl1/Cdh6/Fzd5/Lsr/Prkaca/Smad7/Ikbkb/Flcn/Cldn8/Cdh26/Gjb2/Snai2/Hdac7/Wnt11/Cdh20/Gjc1/Pkp2/Nphp4/Prkch/Micall2/Epha2/Cdh8/Irx3/Prkca/Cldn34b2/Ephb2/Ildr1/Ptpro/Ugt8a/Jam3
BP	GO:0050866	negative regulation of cell activation	148	-0.449874	-1.4562	0.000778591	0.00974188	0.0073628	2956	tags=34%, list=20%, signal=27%	Serpine2/Hspb1/Cd200/Gclc/Pde5a/Nrarp/Gnrh1/Mill1/Ubash3b/Pdgfb/Pglyrp2/Smad7/Parp3/Tarm1/Tbc1d10c/Cd74/Syt11/Rassf5/Socs5/Btn2a2/Il2ra/Zbtb46/Axl/Slc4a2/Socs6/Prdx2/Cblb/Lag3/Irf1/Mdk/Rhbdd3/Bcl6/Ildr2/Zfp608/Foxj1/Lrrc32/Anxa1/Socs1/Cd274/Shh/Adgrf5/Il20rb/Flt3/Pla2g5/Spn/Zc3h12d/Cd300lf/Laptm5/Sox11/Gpnmb
BP	GO:0043010	camera-type eye development	300	-0.449759	-1.50002	2.25284e-06	9.12399e-05	6.8958e-05	4196	tags=42%, list=29%, signal=31%	Ephb1/Lrp5/Nf1/Apc/Stat3/Tgfbr1/Casz1/Lamc3/Wt1/Atp2b4/Cited2/Nectin3/Nectin1/Elp6/Slc38a8/Klf4/Hipk2/Tub/Ptprm/Aqp1/Gnb1/Crx/Sdk1/Lama1/Tfap2a/Rax/Dscam/Agtpbp1/Smad3/Slc7a11/Bmpr2/Calb1/Bmpr1b/Prickle1/Phactr4/Pou2f1/Acvrl1/Nfib/Lmx1b/Fzd5/Meis1/Mdm1/Foxc2/B9d1/Cdkn1b/Mfsd2a/Rpgrip1l/Ahr/Ift122/Pdgfb/Mitf/Notch2/Rara/Bbs10/Cc2d2a/Arl6/Hif1a/Shroom2/Vim/Grk1/Bmp7/Tgfb2/Tulp3/Lhx2/Fbn2/Naglu/Foxn…
BP	GO:0072006	nephron development	126	-0.44929	-1.4339	0.0036474	0.030674	0.0231831	2632	tags=33%, list=18%, signal=28%	Foxc2/Itgb3/Ahr/Aqp11/Pdgfb/Hey1/Notch2/Wnt2b/Kirrel3/Hs2st1/Bmp7/Foxd1/Pbx1/Prom1/Plce1/Wnt11/Irx1/Col4a3/Kif26b/Agtr1a/Foxj1/Fat4/Hnf1b/Sulf1/Six1/Cfh/Wnt7b/Notch3/Tek/Shh/Irx3/Angpt1/Pou3f3/Sox8/Dchs1/Ptpro/Lhx1/Klf15/Tfap2b/Irx2/Egr1/Dll1
BP	GO:0051606	detection of stimulus	122	-0.448883	-1.42939	0.00353874	0.0300891	0.022741	3748	tags=39%, list=26%, signal=29%	Grik2/Wdr47/Htr7/Lhfpl5/Gnb1/Reep6/Cdhr2/Cacnb3/Ngfr/Fyn/Serpine2/Tlr9/Pak1/Nr2f6/Pglyrp2/Kit/Or5p52/Lbp/Scn10a/Grk1/Nlrp3/Scn9a/Kcnk2/Strc/Pcdh15/Naip1/Grin2b/Cxcl12/Pkd2l2/Opn3/Adgrv1/Nlrc4/Grm8/Sox2/Rom1/Atp8a2/Kcnmb2/Ptprq/Ntrk1/Ntsr1/Kcnmb3/Grm6/Or10d5j/Kcna1/Trpa1/Tmc2/Or13p8/Tgfb3
BP	GO:0007186	G protein-coupled receptor signaling pathway	418	-0.448142	-1.50458	4.20017e-08	3.59115e-06	2.71415e-06	4342	tags=46%, list=30%, signal=33%	Rock1/Rph3al/Gnai2/Rgs10/Ffar2/Itpr1/Aplp1/Dgkh/Homer1/Esr1/Penk/Prex2/Rela/Galr3/F2r/Rapgef2/Gsk3a/Slit3/Adgra2/Gkap1/Ric8b/Or51v8/Cdk5r1/Ramp1/Atp2b4/Qrfprl/Fzd3/Fzd7/Nos1/Plch2/Ppard/Fgf8/Ezr/Ptger3/Gna12/Gpr27/Tub/Htr7/Gnb4/Pde10a/Gnao1/Gipr/Akap5/Gnb1/Adgrl2/Tas1r1/Sort1/Ptger4/Gnas/Plek/Or6c5c/Tacr3/F2/Gpr68/Sorl1/Akt1/Ppp1r9b/Adrb3/Src/Git1/Fyn/Adm/Lrp1/Arrdc3/Iqgap2/Tbxa2r/Prkd1/Adgre4/Pd…
BP	GO:0045165	cell fate commitment	212	-0.447661	-1.47703	0.000164542	0.00281366	0.00212653	2846	tags=34%, list=20%, signal=28%	Onecut2/Pax3/Arx/Prrx1/AW551984/Nfib/Acvr1/Foxc2/Tbx4/Epop/Mitf/Notch2/Rara/Wnt2b/Smad5/Pou4f1/Tgfb2/Dhh/Spdef/Foxn4/Vsx2/Tbx6/Sfrp2/Men1/Tbr1/Wnt11/Fgf10/Cyld/Bcl11b/Prox1/Gata2/Ror2/Gas1/Lbx1/Sox18/Il7/Ets2/Gsc/Onecut1/Nr2e1/Hnf1b/Six1/Wnt7b/Sox2/Dock7/Notch3/Dlx2/Tenm4/Gli2/Shh/Tlx3/Spn/Sox17/Chrdl1/Ntf5/Nfix/Glis1/Runx2/Sox8/Chrd/Tbx19/Sh3pxd2b/Dbx1/Sox6/Lmo4/Ascl1/Hey2/Eomes/Tbx2/Dmrta2/Dll1…
BP	GO:0048839	inner ear development	171	-0.445785	-1.4596	0.00055578	0.00737367	0.00557293	3087	tags=32%, list=21%, signal=26%	Insig1/Prrx1/Gbx2/Calb1/Ush2a/Cdkn1b/Rpgrip1l/Triobp/Bmper/Hey1/Otx1/H2-DMa/Ttc39c/Cebpd/Gjb2/Otogl/Tgfb2/Nherf1/Kcnk2/Strc/Naglu/Pcdh15/Fgf10/Prox1/Gata2/Ror2/Gsdme/Mafb/Ankrd24/Stox1/Fat4/Adgrv1/Six1/Ror1/Sox2/Kcnq4/Atp8a2/Gli2/Slc26a5/Shh/Itga8/Ptprq/Hesx1/C1qb/Ephb2/Hpca/Msx1/Dchs1/Col2a1/Ntn1/Hey2/Prrx2/Tbx2/Dll1/Fzd2
BP	GO:0034767	positive regulation of monoatomic ion transmembrane transport	112	-0.445629	-1.41016	0.00585071	0.0413039	0.031217	4425	tags=42%, list=30%, signal=29%	Slc9a1/Wnk2/Dmd/F2r/Prss8/Lcn2/Dbi/Tesc/Nos1/Rnf207/Akap5/Cacnb3/F2/Nipsnap2/Akap6/G6pdx/Fxyd6/Ppp3r1/Hspa2/Dpp6/Ikbkb/Nlgn3/Cnksr3/Nherf1/Lrrc26/Ank2/Gstm7/Cftr/Ehd3/Agtr1a/Trpc6/Amigo1/Npsr1/Lrrc55/Ntsr1/Adcyap1r1/Arc/Atp2a1/Stac3/Ephb2/Kcne1/Grm6/Thy1/Sri/Ms4a1/Kcnh2/Cd19
BP	GO:0001654	eye development	340	-0.442729	-1.48181	1.03532e-06	4.82836e-05	3.64922e-05	4196	tags=41%, list=29%, signal=30%	Ephb1/Lrp5/Nf1/Apc/Stat3/Tgfbr1/Casz1/Lamc3/Wt1/Atp2b4/Cited2/Nectin3/Nectin1/Elp6/Slc38a8/Klf4/Hipk2/Tub/Ptprm/Fgf9/Aqp1/Sipa1l3/Gnb1/Crx/Sdk1/Lama1/Tfap2a/Rax/Dscam/Bmp6/Agtpbp1/Smad3/Slc7a11/Bmpr2/Calb1/Bmpr1b/Prickle1/Phactr4/Pou2f1/Pbx3/Acvrl1/Nfib/Lmx1b/Fzd5/Meis1/Mdm1/Sall2/Foxc2/B9d1/Cdkn1b/Mfsd2a/Rpgrip1l/Ahr/Ift122/Pdgfb/Mitf/Notch2/Rara/Bbs10/Cc2d2a/Arl6/Hif1a/Shroom2/Vim/Col5a2/Tmem21…
BP	GO:0150063	visual system development	340	-0.442729	-1.48181	1.03532e-06	4.82836e-05	3.64922e-05	4196	tags=41%, list=29%, signal=30%	Ephb1/Lrp5/Nf1/Apc/Stat3/Tgfbr1/Casz1/Lamc3/Wt1/Atp2b4/Cited2/Nectin3/Nectin1/Elp6/Slc38a8/Klf4/Hipk2/Tub/Ptprm/Fgf9/Aqp1/Sipa1l3/Gnb1/Crx/Sdk1/Lama1/Tfap2a/Rax/Dscam/Bmp6/Agtpbp1/Smad3/Slc7a11/Bmpr2/Calb1/Bmpr1b/Prickle1/Phactr4/Pou2f1/Pbx3/Acvrl1/Nfib/Lmx1b/Fzd5/Meis1/Mdm1/Sall2/Foxc2/B9d1/Cdkn1b/Mfsd2a/Rpgrip1l/Ahr/Ift122/Pdgfb/Mitf/Notch2/Rara/Bbs10/Cc2d2a/Arl6/Hif1a/Shroom2/Vim/Col5a2/Tmem21…
BP	GO:0048880	sensory system development	344	-0.442158	-1.48089	9.15535e-07	4.54519e-05	3.4352e-05	4196	tags=41%, list=29%, signal=30%	Ephb1/Lrp5/Nf1/Apc/Stat3/Tgfbr1/Casz1/Lamc3/Wt1/Atp2b4/Cited2/Nectin3/Nectin1/Elp6/Slc38a8/Klf4/Hipk2/Tub/Ptprm/Fgf9/Aqp1/Sipa1l3/Gnb1/Crx/Sdk1/Lama1/Tfap2a/Rax/Dscam/Bmp6/Agtpbp1/Smad3/Slc7a11/Bmpr2/Calb1/Bmpr1b/Prickle1/Phactr4/Pou2f1/Pbx3/Acvrl1/Nfib/Lmx1b/Fzd5/Meis1/Mdm1/Sall2/Foxc2/B9d1/Cdkn1b/Mfsd2a/Rpgrip1l/Ahr/Ift122/Pdgfb/Mitf/Notch2/Rara/Bbs10/Cc2d2a/Arl6/Hif1a/Shroom2/Vim/Col5a2/Tmem21…
BP	GO:0009612	response to mechanical stimulus	166	-0.44128	-1.44224	0.000968373	0.0115529	0.00873156	3870	tags=40%, list=27%, signal=30%	Cited2/Slc1a3/Nos1/Raf1/Abhd12/Htr7/Lhfpl5/Myd88/Aqp1/Ptger4/Map1b/Cacnb3/Txnip/Akt1/Bmp6/Dag1/Sost/Src/Col1a1/Fyn/Calb1/Serpine2/Gclc/Mapk8/Slc38a2/Itgb3/Kit/Capn2/Mbd2/Scn10a/Meis2/Scn9a/Kcnk2/Strc/Irf1/Etv1/Foxp2/Mdk/Pcdh15/Grin2b/Wnt11/Mapk3/Ptk2b/Map2k4/Cxcl12/Pkd2l2/Adgrv1/Postn/Grm8/Sox2/Ptgs2/Atp8a2/Scel/Slc26a5/Btg2/Ptprq/Ntrk1/Tlr8/Slc2a1/Mmp2/Fosb/Igfbp2/Kcna1/Trpa1/Gadd45a/Egfr/Tmc2
BP	GO:1903522	regulation of blood circulation	166	-0.440933	-1.4411	0.000986818	0.0116824	0.00882942	4188	tags=46%, list=29%, signal=33%	Atp2a2/Dsp/F2r/Gsk3a/Smad6/Dbh/Atp2b4/Nos1/Ptger3/Rnf207/Gja5/Htr7/Cacna1h/Gnao1/Bin1/Mdm4/Pik3r1/Casq2/Tmem65/Tacr3/Akt1/Src/Ccn2/Adm/Itga4/Bmpr2/Kcnd3/Akap6/Tbxa2r/Pde5a/Wdr35/Ahr/Pdgfb/Smad7/Nos1ap/Hif1a/Scn10a/Dmpk/Tgfb2/Foxn4/Fkbp1b/Kcne3/Rgs2/Dusp5/Th/Cacna1g/Ank2/Hbegf/Ehd3/Gjc1/Agtr1a/Pkp2/Chrm3/Pde4d/Ptgs2/Cacna1e/Thrb/Ada/Irx3/Itga9/Prkca/Atp2a1/Adra2b/Kcne1/Mmp2/Dsc2/Shox2/Sri/Nmu/Trpa…
BP	GO:0030509	BMP signaling pathway	113	-0.44013	-1.39428	0.00743605	0.0497569	0.0376056	4148	tags=47%, list=28%, signal=34%	Sfrp1/Smad6/Smurf2/Ext1/Rbpms2/Comp/Neo1/Scube3/Usp15/Hipk2/Id1/Ngly1/Sorl1/Bmp6/Smad9/Sost/Smpd3/Bmpr2/Bmpr1b/Fbxl15/Spart/Acvrl1/Acvr1/Bmper/Notch2/Smad7/Dand5/Crim1/Smad5/Bmp7/Tob1/Chrdl2/Foxd1/Kcp/Tmem53/Sfrp2/Tgfbr3/Mapk3/Ror2/Sulf1/Rgma/Fstl1/Chrdl1/Runx2/Ark2c/Chrd/Msx1/Bmp5/Zfp423/Vwc2/Sox11/Tfap2b/Egr1
BP	GO:0007423	sensory organ development	503	-0.439982	-1.48426	5.30172e-09	5.82811e-07	4.40481e-07	4227	tags=41%, list=29%, signal=30%	Eya1/Cthrc1/Ephb1/Lrp5/Nf1/Apc/Sdc4/Myo7a/Stat3/Tgfbr1/Casz1/Lrig1/Lamc3/Wt1/Atp2b4/Sparc/Fzd3/Cited2/Pax8/Nectin3/Nectin1/Elp6/Slc38a8/Fgf8/Klf4/Hipk2/Tub/Lhfpl5/Elmod3/Ptprm/Alg10b/Bnc2/Fgf9/Aqp1/Sipa1l3/Gnb1/Crx/Sdk1/Lama1/Tfap2a/Rax/Dscam/Bmp6/Agtpbp1/Smad3/Insig1/Prrx1/Enpp1/Slc7a11/Gbx2/Bmpr2/Calb1/Bmpr1b/Prickle1/Phactr4/Pou2f1/Pbx3/Acvrl1/Nfib/Lmx1b/Fzd5/Meis1/Ush2a/Mdm1/Sall2/Foxc2/B9d1/…
BP	GO:0045664	regulation of neuron differentiation	168	-0.438623	-1.4355	0.0013175	0.0143804	0.0108685	4342	tags=48%, list=30%, signal=34%	Actr3/Hmg20a/Apbb1/Numb/Timp2/Ncoa1/Tcf12/Rock1/Foxo3/Dmd/Cyb5d2/B2m/Eya1/Nf1/Sfrp1/Etv5/Id2/Casz1/Rac3/Gdpd5/Eif4enif1/Socs2/Ptger3/Bin1/Mapk8ip3/Map1b/Tfap2a/Opa1/Dixdc1/Ngfr/Bmp6/Eif2ak4/Brinp2/Mapk8/Meis1/Hey1/Rara/Nox1/Lmx1a/Bmp7/Pbx1/Tbx6/Sfrp2/Id4/Bcl6/Bcl11b/Cxcl12/Prox1/Gata2/Lbx1/Bend6/Efna3/Nr2e1/Six1/Sox2/Notch3/Dlx2/Trpc6/Zc4h2/Gli2/Shh/Ctdsp1/Trpc5/Nrep/Mmd/Trp73/Tlx3/Irx3/Ltk/Adra2…
BP	GO:0007009	plasma membrane organization	139	-0.43797	-1.40634	0.00346385	0.0296159	0.0223834	3640	tags=37%, list=25%, signal=28%	Akt2/Colec12/Micall1/Flot1/Pacsin2/Bin1/Pals1/Sptbn1/Degs1/Baiap2l1/Mtss1/Pacsin3/Akt1/Asap1/Sh3gl2/Fnbp1l/Izumo1r/Spesp1/Snx9/Sytl4/Nox1/Eqtn/Syt11/Folr2/Tgfb2/Syt7/Nherf1/Chmp2b/Fa2h/Spta1/Ank2/Sh3tc2/Atp10a/Myof/Fer1l6/Mafb/Fer1l4/Fat4/Pacsin1/Dcst1/Myh2/Snx33/Trpc5/Trim72/Degs1l/Emp2/Tmeff2/Abca7/Fer1l5/Mtss2/Tlcd2/Spam1
BP	GO:0010721	negative regulation of cell development	220	-0.43763	-1.44656	0.000191776	0.00320807	0.00242462	3454	tags=35%, list=24%, signal=27%	Id1/Pik3r1/Map2/Tnr/F2/Gpr68/Sorl1/Tsc22d1/Hspb1/Spart/Lrrc17/Nrarp/Prdm16/Ubash3b/Syngap1/Dpysl5/Pglyrp2/Smad7/Rara/Nox1/Tmem176b/Cd74/Rb1/Socs5/Bmp7/Zbtb46/Slc4a2/Ryk/Mbp/Snai2/Prdx2/Cdk6/Lhx2/Npr2/Lag3/Vsx2/Tbx6/Irf1/Id4/Cdk5/Wee2/Mdk/Slit1/Bcl6/S1pr3/Tob2/Atf5/Zfp608/Cftr/Prox1/Gata2/Foxj1/Mafb/Anxa1/Slit2/Nr2e1/Rgma/Hoxa7/Wnt7b/Dlx2/Trpc6/Socs1/Shh/Btg2/Flt3/Ctdsp1/Trpc5/Efnb3/Sema3f/Ephb2/T…
BP	GO:0098742	cell-cell adhesion via plasma-membrane adhesion molecules	150	-0.434332	-1.40534	0.00310798	0.0273324	0.0206575	4673	tags=50%, list=32%, signal=34%	Mmp24/Cntn6/Lrfn4/Il1rap/Cdh3/Robo1/Sparcl1/Igsf9b/Fat2/Scarf1/Epha3/Cdh4/Nectin3/Dsg1a/Nectin1/Ceacam2/Prtg/Nexn/Cldn15/Klf4/Ptprm/Sdk1/Cdhr2/Cd177/Dscam/Cdh15/Esam/Cdh17/Itga4/Atp2c1/Cdh18/Cdh2/Cdh6/Acvr1/Nrcam/Kirrel3/Pcdh8/Lrrc4/Cldn8/Cdh26/Igsf11/Pcdh17/Tgfb2/Mbp/Pcdh15/Fgfrl1/Map2k5/Pcdh12/Tenm3/Ptprd/Cdh20/Cbln1/Cntn5/Pcdh10/Scarf2/Fat4/Cdhr5/Adgrl3/Pcdh19/Flrt3/Dsc3/Amigo1/Tenm4/Cdh8/Hmcn…
BP	GO:0048705	skeletal system morphogenesis	187	-0.429519	-1.41179	0.00220802	0.0211065	0.015952	4227	tags=43%, list=29%, signal=31%	Eya1/Lrp5/Sfrp1/Hyal2/Plekha1/Ext1/Tgfbr1/Comp/Cited2/Actn3/Serpinh1/Fgf8/Axin2/Mmp16/Gnas/Tfap2a/Nab2/Bmp6/Smad3/Insig1/Prrx1/Enpp1/Col1a1/Ccn2/Smpd3/Nab1/Bmpr2/Bmpr1b/Spef2/Hoxd9/Chst11/Foxc2/Arid5b/Chsy1/Tbx4/Eif4a3l1/Rara/Col13a1/Bmp7/Ryk/Tgfb2/Tulp3/Tmem107/Npr2/Fbn2/Bmi1/Men1/Hoxb4/Ror2/Ift80/Gas1/Hoxb2/Eif4a3l2/Gsc/Sulf1/Thbs3/Six1/Hoxa7/Has2/Dlx2/Fosl2/Hoxd8/Dhrs3/Nfix/Alx1/Mmp2/Runx2/Msx…
BP	GO:0032944	regulation of mononuclear cell proliferation	161	-0.427983	-1.39354	0.00489025	0.0360462	0.0272433	2814	tags=32%, list=19%, signal=26%	Pde5a/Gnrh1/Tlr9/Efnb1/Ahr/Cd55/Slc7a1/Il6st/Tarm1/Cd74/Sh3rf1/Jak2/Rassf5/Btn2a2/Il2ra/Csf1/Slc4a2/Kitl/Cblb/Bmi1/Irf1/Spta1/Igf2/Fgf10/Bcl6/Foxj1/Lrrc32/Anxa1/Il7/Il12b/Ticam1/Tnfrsf1b/Icosl/Tirap/Cd274/St6gal1/Shh/Il20rb/Ada/Pla2g5/Spn/Zc3h12d/Tnfrsf13c/Ephb2/Aif1/Igfbp2/Ighm/Mpl/Prlr/Laptm5/Sox11/Gpnmb
BP	GO:0051216	cartilage development	163	-0.427176	-1.39392	0.00481559	0.0358029	0.0270594	3130	tags=39%, list=21%, signal=31%	Bmp6/Smad9/Smad3/Prrx1/Errfi1/Enpp1/Adamts7/Col1a1/Ccn2/Smpd3/Bmpr2/Bmpr1b/Slc26a2/Nfib/Chadl/Evc/Chst11/Chsy1/Smad7/Rara/Wnt2b/Hif1a/Trps1/Rb1/Rspo2/Fbxw4/Smad5/Bmp7/Chrdl2/Tgfb2/Snai2/Npr2/Sfrp2/Mdk/Creb3l2/Mapk3/Ror2/Ift80/Bgn/Sulf1/Thbs3/Cfh/Wnt7b/Dlx2/Gli2/Fosl2/Thrb/Il17f/Pbxip1/Prkca/Runx2/Msx1/Shox2/Osr2/Bmp5/Ctsk/Gpld1/Prkg2/Col2a1/Sox6/Zbtb16/Rflna/Rarb/Prrx2
BP	GO:0007162	negative regulation of cell adhesion	234	-0.426748	-1.41202	0.000563273	0.0074092	0.00559979	4187	tags=41%, list=29%, signal=30%	Plxna1/Nf1/Sdc4/Pag1/Dlc1/Rasa1/Sema4d/Muc21/Rdx/Fzd7/Cdsn/Dusp1/Klf4/Prnp/Il4i1/Pik3r1/Tnr/Sema6a/Plxna4/Akt1/Epb41l5/Dscam/Zfp703/Bmp6/Src/Col1a1/Lrp1/Serpine2/Hspb1/Acvrl1/Pde5a/Nrarp/Gnrh1/Spock1/Ubash3b/Pde3b/Smad7/Cask/Tarm1/Cd74/Jak2/Socs5/Btn2a2/Il2ra/Slc4a2/Spry4/Sema3e/Socs6/Mbp/Snai2/Prdx2/Cblb/Lag3/Gstp1/Irf1/Men1/Plet1/Mdk/Plxnc1/Map2k5/Bcl6/Cxcl12/Ildr2/Zfp608/Enpp2/Foxj1/Lrrc32/Anx…
BP	GO:0022408	negative regulation of cell-cell adhesion	152	-0.426608	-1.38387	0.00489516	0.0360462	0.0272433	3510	tags=34%, list=24%, signal=26%	Prnp/Il4i1/Pik3r1/Tnr/Akt1/Epb41l5/Zfp703/Bmp6/Serpine2/Hspb1/Pde5a/Nrarp/Gnrh1/Ubash3b/Smad7/Tarm1/Cd74/Jak2/Socs5/Btn2a2/Il2ra/Slc4a2/Socs6/Mbp/Prdx2/Cblb/Lag3/Gstp1/Irf1/Mdk/Map2k5/Bcl6/Cxcl12/Ildr2/Zfp608/Foxj1/Lrrc32/Anxa1/Adam8/Socs1/Cd274/Shh/Il20rb/Pla2g5/Spn/Zc3h12d/Muc4/Ppara/Ccl28/Abca12/Laptm5/Gpnmb
BP	GO:0034764	positive regulation of transmembrane transport	161	-0.422618	-1.37608	0.00735401	0.0494228	0.0373531	5166	tags=48%, list=35%, signal=31%	Ocln/Atp1b1/Reln/Acsl5/Mef2a/Abcb1b/Akap9/Ppp3cb/Cx3cl1/Prkci/Acsl1/Adipor2/Slc9a1/Sorbs1/Wnk2/Dmd/F2r/Rasa1/Prss8/C1qtnf12/Lcn2/Slc38a1/Dbi/Tesc/Nfe2l2/Nos1/Rnf207/Akt2/Osbpl8/Capn10/Akap5/Irs2/Cacnb3/F2/Akt1/Nipsnap2/Akap6/G6pdx/Fxyd6/Ppp3r1/C2cd5/Hspa2/Dpp6/Aoc3/Ikbkb/Nlgn3/Cnksr3/Nherf1/Lrrc26/Ank2/Gstm7/Cftr/Ehd3/Agtr1a/Opn3/Trpc6/Amigo1/Npsr1/Lrrc55/Car2/Ntsr1/Adcyap1r1/Repin1/Arc/Atp2a1/St…
BP	GO:0030073	insulin secretion	193	-0.422483	-1.39112	0.00287023	0.0258321	0.0195236	4317	tags=41%, list=30%, signal=29%	Rph3al/Lrrc8a/Ffar2/Itpr1/Lrp5/Cyb5r4/Sfrp1/Stxbp3/C1qtnf12/Nos1/Pla2g6/Ppard/Ptger3/Gpr27/Raf1/Myo5a/Capn10/Gnao1/Gipr/Pclo/Irs2/Gnas/Brsk2/Sybu/Ncoa6/F2/Gpr68/Stxbp4/Myrip/Lrp1/Hnf1a/Clock/Rab11fip2/Pdx1/Prkaca/Ccdc186/Midn/Pde3b/Sytl4/Hif1a/Cask/Tm7sf3/Bmal1/Gck/Jak2/Abat/Foxo1/Gnaz/Baiap3/Rapgef4/Adcy8/Syt7/Nlgn2/Fkbp1b/Ildr2/Cftr/Anxa1/Hmga1/Chrm3/Hnf1b/Mcu/Pde1c/Adcy5/Sirt3/Cacna1e/Cplx1/Gp…
BP	GO:0050670	regulation of lymphocyte proliferation	157	-0.421206	-1.36811	0.00729398	0.0494228	0.0373531	2814	tags=32%, list=19%, signal=26%	Pde5a/Gnrh1/Tlr9/Efnb1/Ahr/Cd55/Slc7a1/Il6st/Tarm1/Cd74/Sh3rf1/Jak2/Rassf5/Btn2a2/Il2ra/Slc4a2/Kitl/Cblb/Bmi1/Irf1/Spta1/Igf2/Fgf10/Bcl6/Foxj1/Lrrc32/Anxa1/Il7/Il12b/Ticam1/Tnfrsf1b/Icosl/Tirap/Cd274/Shh/Il20rb/Ada/Pla2g5/Spn/Zc3h12d/Tnfrsf13c/Ephb2/Aif1/Igfbp2/Ighm/Mpl/Prlr/Laptm5/Sox11/Gpnmb
BP	GO:0030072	peptide hormone secretion	220	-0.420859	-1.39112	0.000848041	0.0104411	0.00789125	4317	tags=42%, list=30%, signal=30%	Rph3al/Lrrc8a/Ffar2/Itpr1/Lrp5/Cyb5r4/Sfrp1/Stxbp3/C1qtnf12/Pax8/Nos1/Pla2g6/Ppard/Ptger3/Gpr27/Raf1/Myo5a/Capn10/Gnao1/Aqp1/Gipr/Pclo/Irs2/Ptger4/Gnas/Brsk2/Sybu/Ncoa6/F2/Gpr68/Stxbp4/Myrip/Smpd3/Lrp1/Prkd1/Hnf1a/Clock/Rab11fip2/Slc16a10/Madd/Pdx1/Prkaca/Rab8b/Ccdc186/Midn/Pde3b/Sytl4/Hif1a/Cask/Tm7sf3/Bmal1/Gck/Jak2/Abat/Foxo1/Gnaz/Baiap3/Rapgef4/Adcy8/Syt7/Nlgn2/Fkbp1b/Cpe/Ildr2/Cftr/Gabbr1/An…
BP	GO:0070663	regulation of leukocyte proliferation	174	-0.420585	-1.37946	0.0043589	0.0335417	0.0253504	2814	tags=32%, list=19%, signal=26%	Pde5a/Gnrh1/Tlr9/Efnb1/Ahr/Cd55/Hhex/Slc7a1/Il6st/Kit/Tarm1/Cd74/Sh3rf1/Jak2/Rassf5/Btn2a2/Il2ra/Csf1/Slc4a2/Kitl/Cblb/Gstp1/Bmi1/Irf1/Spta1/Igf2/Fgf10/Mapk3/Bcl6/Foxj1/Lrrc32/Anxa1/Il7/Il12b/Ticam1/Tnfrsf1b/Icosl/Tirap/Cd274/St6gal1/Shh/Il20rb/Ada/Pla2g5/Spn/Zc3h12d/Tnfrsf13c/Ephb2/Aif1/Igfbp2/Ighm/Mpl/Prlr/Laptm5/Sox11/Gpnmb
BP	GO:0007409	axonogenesis	398	-0.420274	-1.40935	1.46608e-05	0.000417833	0.000315793	4789	tags=45%, list=33%, signal=31%	Unc5b/Actr3/Plxna2/Apbb1/Lama2/Numb/Lgr4/Cntn6/Mycbp2/Hspg2/Robo1/Tnn/Dcc/Rab21/B4galt5/Trio/Plxnb1/Adarb1/Usp9x/Gfra3/Epha3/Disc1/Efnb2/Aplp1/Unc5c/Sema5b/Ephb1/Plxna1/Apc/Cdh4/Ext1/Tubb3/Sema4d/Slit3/Lamc3/Gla/Cdk5r1/Spast/Neo1/Dbn1/Fzd3/Megf9/Rac3/Arhgap4/Sema3c/Nectin1/Myo5b/Prtg/Nexn/Fgf8/Draxin/Wdr47/Stxbp1/Ptprm/Flot1/Cobl/Tiam2/Mapk8ip3/Map2/Map1b/Tnr/Lama1/Nell2/Igf1r/Brsk2/Sema6a/Plxna4…
BP	GO:0034765	regulation of monoatomic ion transmembrane transport	234	-0.419919	-1.38942	0.00115052	0.0131159	0.00991283	4425	tags=40%, list=30%, signal=28%	Slc9a1/Ucp2/Wnk2/Slc31a2/Dmd/Homer1/F2r/Tmbim6/Prss8/Lcn2/Atp2b4/Dbi/Tesc/Nos1/Camk2d/Ptger3/Rnf207/Myo5a/Slc30a1/Prnp/Akap5/Bin1/Nol3/Casq2/Cacnb3/Ripk1/F2/Akt1/Nipsnap2/Fyn/Akap6/Prkd1/G6pdx/Kcnab1/Fxyd6/Ppp3r1/Tlr9/Ubash3b/Itgb3/Kcnj10/Ahr/Hspa2/Dpp6/Ikbkb/Stom/Nlgn3/Scn10a/Cnksr3/Tgfb2/Vamp2/Gpr35/Nherf1/Lrrc26/Fkbp1b/Slc9a6/Kcne3/Grin2b/Ank2/Gstm7/Ptk2b/Tmem74/Cftr/Ehd3/Agtr1a/Mcub/Smim6/Pde…
BP	GO:0001649	osteoblast differentiation	165	-0.419255	-1.36958	0.00428868	0.0331672	0.0250674	4261	tags=48%, list=29%, signal=34%	Gli1/Cthrc1/Lrp5/Penk/Nf1/Apc/Snai1/Sfrp1/Smad6/Id2/Sema4d/Suco/Zhx3/Trp53inp2/Hdac8/Scube3/Fgf9/Clic1/Axin2/Id1/Ctnnbip1/Ptger4/Gnas/Noct/Akt1/Bmp6/Smad3/Enpp1/Col1a1/Bmpr2/Bmpr1b/Prkd1/Limd1/Acvr1/Prkaca/Tmt1a2/Ahr/Hey1/Il6st/Fam20c/Crim1/Rspo2/Ranbp3l/Smad5/Cebpd/Bmp7/Tob1/Snai2/Dhh/Cdk6/Fbn2/Tmem53/Sfrp2/Trp63/Hdac7/Men1/Id4/Tgfbr3/Igf2/Wnt11/Gabbr1/Ift80/Wnt7b/Sox2/Epha2/Gli2/Fosl2/Shh/A4300…
BP	GO:0007600	sensory perception	332	-0.418708	-1.40046	9.08092e-05	0.00174694	0.00132032	4273	tags=43%, list=29%, signal=31%	Disc1/B2m/Cln5/Wfs1/Sema5b/Ephb1/Penk/Myo7a/F2r/Abca4/Lrig1/Lamc3/Ric8b/Or51v8/Ccdc50/Slc1a3/Myo1a/Fam107b/Grik2/Slc38a8/Rlbp1/Wdr47/Marveld2/Myo5a/Tub/Htr7/Lhfpl5/Elmod3/Alg10b/Aqp1/Rnf170/Gnb1/Wdr1/Crx/Tas1r1/Bbs2/Dcdc2a/Reep6/Gnas/Cacnb3/Tfap2a/Opa1/Or6c5c/Enpp1/Col1a1/Fyn/Serpine2/Rdh11/Cnga1/Ush2a/Cdkn1b/Kcnj10/Reep2/Nr2f6/Triobp/Gpr179/Nav2/Or5d43/Bbs10/Kit/Or5p52/Vmn1r46/Barhl1/Scn10a/Grk1…
BP	GO:0032943	mononuclear cell proliferation	216	-0.418379	-1.38158	0.00220361	0.0211065	0.015952	2814	tags=31%, list=19%, signal=25%	Pde5a/Gnrh1/Tlr9/Efnb1/Ahr/Cd55/Slc7a1/Il6st/Tarm1/Cd74/Sh3rf1/Jak2/Rassf5/Btn2a2/Il2ra/Csf1/Slc4a2/Kitl/Dock2/Prdx2/Cblb/Fkbp1b/Bmi1/Irf1/Spta1/Igf2/Fgf10/Zbtb32/Bcl6/Cxcl12/Foxj1/Lrrc32/Anxa1/Il7/Il12b/Ticam1/Tnfrsf1b/Icosl/Ephb6/Tirap/Cd274/Slc11a1/Fosl2/St6gal1/Cd180/Shh/Il20rb/Flt3/Ada/Pla2g5/Emp2/Spn/Zc3h12d/Tnfrsf13c/Itgb2/Ephb2/Aif1/Igfbp2/Nfkbiz/Ighm/Mpl/Prlr/Cd19/Laptm5/Sox11/Gpnmb
BP	GO:0046651	lymphocyte proliferation	210	-0.415855	-1.37173	0.0019814	0.0196734	0.0148689	2814	tags=30%, list=19%, signal=25%	Pde5a/Gnrh1/Tlr9/Efnb1/Ahr/Cd55/Slc7a1/Il6st/Tarm1/Cd74/Sh3rf1/Jak2/Rassf5/Btn2a2/Il2ra/Slc4a2/Kitl/Dock2/Prdx2/Cblb/Fkbp1b/Bmi1/Irf1/Spta1/Igf2/Fgf10/Zbtb32/Bcl6/Cxcl12/Foxj1/Lrrc32/Anxa1/Il7/Il12b/Ticam1/Tnfrsf1b/Icosl/Ephb6/Tirap/Cd274/Slc11a1/Fosl2/Cd180/Shh/Il20rb/Flt3/Ada/Pla2g5/Emp2/Spn/Zc3h12d/Tnfrsf13c/Itgb2/Ephb2/Aif1/Igfbp2/Nfkbiz/Ighm/Mpl/Prlr/Cd19/Laptm5/Sox11/Gpnmb
BP	GO:0001822	kidney development	280	-0.415515	-1.38205	0.000412814	0.0058826	0.004446	4577	tags=46%, list=31%, signal=32%	Npnt/Kif3a/Robo1/Akr1b1/Arg2/Pax2/Smad1/Prdm1/Gfra1/Hs3st3b1/Tiparp/Arl3/Bcl2l11/Efnb2/Wfs1/Eya1/Nf1/Apc/Casp9/Sdc4/Sfrp1/Smad6/Ext1/Tgfbr1/Id2/Acat1/Wt1/Pax8/Fgf8/Basp1/Aqp1/Bicc1/Ctnnbip1/Myo1e/Tfap2a/Mtss1/Anxa4/Enpep/Bmp6/Smad9/Smad3/Enpp1/Calb1/Pcsk5/Cat/Sdc1/Foxc2/Arid5b/Itgb3/Mpst/Rpgrip1l/Ahr/Adamts6/Aqp11/Pdgfb/Bmper/Hey1/Notch2/Smad7/Rara/Cc2d2a/Wnt2b/Kirrel3/Flcn/Hs2st1/Smad5/Amer1/Bmp…
BP	GO:0003007	heart morphogenesis	223	-0.415055	-1.3716	0.0020925	0.0205118	0.0155026	4227	tags=40%, list=29%, signal=29%	Eya1/Snai1/Dsp/Dlc1/Gsk3a/Smad6/Ext1/Tgfbr1/Id2/Slit3/Sufu/Cited2/Sema3c/Fgf8/Mrtfb/Cert1/Rnf207/Gja5/Ube4b/Fgf9/Axin2/Mdm4/Stil/Tfap2a/Smad3/Dag1/Bmpr2/Prickle1/C2cd3/Acvrl1/Acvr1/Mesp2/Foxc2/Ahr/Zic3/Hey1/Notch2/Smad7/Hif1a/Adprhl1/Bmp7/Pou4f1/Gng5/Tgfb2/Snai2/Naglu/Foxn4/Tbx6/Sfrp2/Ephb4/Tgfbr3/Olfm1/Fgfrl1/Asb2/Wnt11/Cpe/Prox1/Lbx1/Spry1/Pkp2/Slit2/Fat4/Parva/Six1/Mical2/Has2/Tek/Shh/Emp2/Ang…
BP	GO:1904062	regulation of monoatomic cation transmembrane transport	214	-0.413663	-1.36569	0.00375906	0.0307723	0.0232574	4425	tags=39%, list=30%, signal=28%	Slc9a1/Ucp2/Wnk2/Slc31a2/Dmd/Homer1/F2r/Tmbim6/Prss8/Lcn2/Atp2b4/Dbi/Tesc/Nos1/Camk2d/Ptger3/Rnf207/Myo5a/Slc30a1/Prnp/Akap5/Bin1/Nol3/Casq2/Cacnb3/F2/Akt1/Nipsnap2/Fyn/Akap6/Prkd1/G6pdx/Kcnab1/Fxyd6/Ppp3r1/Tlr9/Ubash3b/Itgb3/Ahr/Hspa2/Dpp6/Ikbkb/Cnksr3/Tgfb2/Vamp2/Gpr35/Nherf1/Lrrc26/Fkbp1b/Slc9a6/Kcne3/Grin2b/Ank2/Gstm7/Ptk2b/Tmem74/Ehd3/Agtr1a/Mcub/Smim6/Pde4d/Gnb2/Gnb5/Amigo1/Npsr1/Lrrc55/Jph…
BP	GO:0002790	peptide secretion	223	-0.413392	-1.36611	0.00224064	0.0212861	0.0160878	4317	tags=42%, list=30%, signal=30%	Rph3al/Lrrc8a/Ffar2/Itpr1/Lrp5/Cyb5r4/Sfrp1/Stxbp3/C1qtnf12/Pax8/Nos1/Pla2g6/Ppard/Ptger3/Gpr27/Raf1/Myo5a/Capn10/Gnao1/Aqp1/Gipr/Pclo/Irs2/Ptger4/Gnas/Brsk2/Sybu/Ncoa6/F2/Gpr68/Stxbp4/Myrip/Smpd3/Lrp1/Prkd1/Hnf1a/Clock/Rab11fip2/Slc16a10/Madd/Pdx1/Prkaca/Rab8b/Ccdc186/Midn/Pde3b/Sytl4/Hif1a/Cask/Tm7sf3/Bmal1/Cd74/Gck/Jak2/Abat/Foxo1/Gnaz/Baiap3/Rapgef4/Adcy8/Syt7/Nlgn2/Fkbp1b/Cpe/Ildr2/Cftr/Gabb…
BP	GO:0061448	connective tissue development	235	-0.413034	-1.36739	0.0022754	0.0213527	0.0161381	3162	tags=36%, list=22%, signal=29%	Sorl1/Bmp6/Smad9/Smad3/Prrx1/Errfi1/Enpp1/Adamts7/Col1a1/Ccn2/Smpd3/Bmpr2/Bmpr1b/Arrdc3/Slc26a2/Spart/Ap1s2/Nfib/Chadl/Evc/Chst11/Foxc2/Arid5b/Itgb3/Chsy1/Pdgfb/Smad7/Rara/Wnt2b/Hif1a/Trps1/Rb1/Rspo2/Fbxw4/Smad5/Csf1/Amer1/Bmp7/Chrdl2/Tgfb2/Foxd1/Snai2/Npr2/Sfrp2/Id4/Mdk/Creb3l2/Mapk3/Ror2/Ift80/Bgn/Sulf1/Thbs3/Zfp516/Cfh/Wnt7b/Dlx2/Gli2/Fosl2/Thrb/Il17f/Pbxip1/Selenom/Prkca/Runx2/Sox8/Msx1/Shox2…
BP	GO:0002791	regulation of peptide secretion	182	-0.412586	-1.35654	0.0062092	0.0434362	0.0328286	3841	tags=42%, list=26%, signal=31%	Rph3al/Lrrc8a/Ffar2/Itpr1/Lrp5/Sfrp1/C1qtnf12/Pax8/Nos1/Pla2g6/Ppard/Ptger3/Gpr27/Capn10/Gnao1/Gipr/Irs2/Ptger4/Gnas/Brsk2/Sybu/Ncoa6/F2/Gpr68/Stxbp4/Myrip/Lrp1/Prkd1/Hnf1a/Clock/Madd/Pdx1/Prkaca/Rab8b/Midn/Pde3b/Sytl4/Hif1a/Cask/Tm7sf3/Bmal1/Cd74/Gck/Jak2/Abat/Foxo1/Gnaz/Baiap3/Rapgef4/Adcy8/Syt7/Nlgn2/Fkbp1b/Cftr/Gabbr1/Chrm3/Mcu/Pde1c/Adcy5/Sirt3/Cacna1e/Ildr1/Gpld1/Efna5/Sri/Nmu/Orai1/Trpa1/S…
BP	GO:0090087	regulation of peptide transport	182	-0.412586	-1.35654	0.0062092	0.0434362	0.0328286	3841	tags=42%, list=26%, signal=31%	Rph3al/Lrrc8a/Ffar2/Itpr1/Lrp5/Sfrp1/C1qtnf12/Pax8/Nos1/Pla2g6/Ppard/Ptger3/Gpr27/Capn10/Gnao1/Gipr/Irs2/Ptger4/Gnas/Brsk2/Sybu/Ncoa6/F2/Gpr68/Stxbp4/Myrip/Lrp1/Prkd1/Hnf1a/Clock/Madd/Pdx1/Prkaca/Rab8b/Midn/Pde3b/Sytl4/Hif1a/Cask/Tm7sf3/Bmal1/Cd74/Gck/Jak2/Abat/Foxo1/Gnaz/Baiap3/Rapgef4/Adcy8/Syt7/Nlgn2/Fkbp1b/Cftr/Gabbr1/Chrm3/Mcu/Pde1c/Adcy5/Sirt3/Cacna1e/Ildr1/Gpld1/Efna5/Sri/Nmu/Orai1/Trpa1/S…
BP	GO:0015833	peptide transport	230	-0.4124	-1.36423	0.00177816	0.0184905	0.0139749	4317	tags=41%, list=30%, signal=30%	Rph3al/Lrrc8a/Ffar2/Itpr1/Lrp5/Cyb5r4/Sfrp1/Stxbp3/C1qtnf12/Pax8/Nos1/Pla2g6/Ppard/Ptger3/Gpr27/Raf1/Myo5a/Capn10/Gnao1/Aqp1/Gipr/Pclo/Irs2/Ptger4/Gnas/Brsk2/Sybu/Ncoa6/F2/Slc15a5/Gpr68/Stxbp4/Myrip/Smpd3/Lrp1/Prkd1/Hnf1a/Clock/Rab11fip2/Slc16a10/Madd/Pdx1/Prkaca/Rab8b/Ccdc186/Midn/Pde3b/Sytl4/Hif1a/Cask/Tm7sf3/Bmal1/Cd74/Gck/Jak2/Abat/Foxo1/Gnaz/Baiap3/Rapgef4/Adcy8/Syt7/Nlgn2/Fkbp1b/Cpe/Ildr2/C…
BP	GO:0072001	renal system development	291	-0.410818	-1.36688	0.000646347	0.0082894	0.00626503	4577	tags=45%, list=31%, signal=32%	Npnt/Kif3a/Robo1/Akr1b1/Arg2/Pax2/Smad1/Prdm1/Gfra1/Hs3st3b1/Tiparp/Arl3/Bcl2l11/Efnb2/Wfs1/Eya1/Nf1/Apc/Casp9/Sdc4/Sfrp1/Smad6/Ext1/Tgfbr1/Id2/Acat1/Wt1/Pax8/Fgf8/Basp1/Aqp1/Bicc1/Ctnnbip1/Myo1e/Tfap2a/Mtss1/Anxa4/Enpep/Bmp6/Smad9/Smad3/Enpp1/Calb1/Prickle1/Pcsk5/Cat/Sdc1/Foxc2/Arid5b/Itgb3/Mpst/Rpgrip1l/Ahr/Adamts6/Aqp11/Pdgfb/Bmper/Hey1/Notch2/Smad7/Rara/Cc2d2a/Wnt2b/Kirrel3/Flcn/Hs2st1/Smad5/…
BP	GO:0010001	glial cell differentiation	226	-0.410617	-1.35699	0.00212954	0.0207428	0.0156771	3640	tags=34%, list=25%, signal=26%	Akt2/Raf1/Myd88/Bin1/Wdr1/Pals1/F2/B4galt6/Cntnap1/Akt1/Nab2/Dag1/Enpp1/Nab1/Lrp1/Serpine2/Cdh2/Ncmap/Pard3/Nfib/Cspg5/Ppp3r1/Nr3c1/Kcnj10/Pdgfb/Notch2/Il6st/Vim/Dner/Nlgn3/Pou3f1/Gfap/Dhh/Exoc4/Naglu/Gstp1/Id4/Cntn1/Cdk5/Mdk/Fa2h/Arsg/Fgf10/Mapk3/Sh3tc2/Atf5/Slc45a3/Enpp2/Hdac11/Ror2/Nr2e1/Tnfrsf1b/Wasf3/Ror1/Dlx2/Tenm4/Shh/Trpc4/Metrn/Opalin/Trp73/Ntrk2/Nrros/Nfix/Cdkn2c/Sox8/Arhgef10/Dab1/Sox6…
BP	GO:0009887	animal organ morphogenesis	834	-0.410038	-1.39638	4.40205e-09	5.21135e-07	3.93868e-07	4389	tags=42%, list=30%, signal=31%	Adarb1/Prdm1/Sox1/Flvcr1/Dnah11/Hs3st3b1/Fgf7/Foxo3/Ppp2r3a/Tiparp/Fem1b/Bcl2l11/Gli1/Efnb2/Itpr1/Phlda2/Msn/Eya1/Cthrc1/Ephb1/Esr1/Lrp5/Plxna1/Nf1/Apc/Snai1/Rela/Myo7a/Sfrp1/Hyal2/Plekha1/Dsp/Dlc1/Etv5/Gsk3a/Smad6/Ext1/Stat3/Tgfbr1/Id2/Nckap1/Casz1/Rbpms2/Slit3/Lrig1/Comp/Lamc3/Wt1/Sufu/Sparc/Lims2/Fzd3/Megf9/Cited2/Cdsn/Sema3c/Pax8/Nectin3/Nectin1/Ceacam2/Actn3/Stat6/Serpinh1/Fgf8/Mrtfb/Itga6/C…
BP	GO:0090276	regulation of peptide hormone secretion	181	-0.409872	-1.34684	0.0071759	0.0490831	0.0370964	4317	tags=41%, list=30%, signal=30%	Rph3al/Lrrc8a/Ffar2/Itpr1/Lrp5/Sfrp1/C1qtnf12/Pax8/Nos1/Pla2g6/Ppard/Ptger3/Gpr27/Capn10/Gnao1/Gipr/Irs2/Ptger4/Gnas/Brsk2/Sybu/Ncoa6/F2/Gpr68/Stxbp4/Myrip/Lrp1/Prkd1/Hnf1a/Clock/Madd/Pdx1/Prkaca/Rab8b/Midn/Pde3b/Sytl4/Hif1a/Cask/Tm7sf3/Bmal1/Gck/Jak2/Abat/Foxo1/Gnaz/Baiap3/Rapgef4/Adcy8/Syt7/Nlgn2/Fkbp1b/Cftr/Gabbr1/Chrm3/Mcu/Pde1c/Adcy5/Sirt3/Cacna1e/Ildr1/Gpld1/Efna5/Sri/Nmu/Orai1/Trpa1/Sirt4/…
BP	GO:0061564	axon development	443	-0.409504	-1.37706	3.56402e-05	0.000808257	0.000610871	4789	tags=44%, list=33%, signal=30%	Unc5b/Actr3/Plxna2/Apbb1/Lama2/Numb/Lgr4/Cntn6/Mycbp2/Hspg2/Robo1/Tnn/Dcc/Rab21/B4galt5/Trio/Plxnb1/Scarf1/Adarb1/Usp9x/Gfra3/Epha3/Disc1/Efnb2/Aplp1/Unc5c/Sema5b/Ephb1/Inpp5f/Plxna1/Apc/Cdh4/Ext1/Tubb3/Sema4d/Slit3/Camsap2/Lamc3/Gla/Cdk5r1/Spast/Neo1/Dbn1/Fzd3/Megf9/Epb41l3/Rac3/Arhgap4/Sema3c/Nectin1/Myo5b/Prtg/Nexn/Fgf8/Draxin/Klf4/Wdr47/Stxbp1/Ptprm/Flot1/Cobl/Tiam2/Mapk8ip3/Map2/Map1b/Tnr/La…
BP	GO:0002460	adaptive immune response based on somatic recombination of immune receptors built from immunoglobulin superfamily domains	238	-0.409337	-1.35603	0.00382967	0.0310203	0.0234448	2554	tags=36%, list=18%, signal=30%	Arid5a/Lig4/Il1r1/Sanbr/Rora/Stat6/Hmces/Susd4/Kdelr1/Pou2f2/Myd88/Fcgr1/Il4i1/Opa1/Crlf2/Klhl22/Enpp1/Cr1l/Fzd5/Mill1/Il18bp/Ahr/Cd55/6030468B19Rik/Il2rb/Smad7/Aire/Parp3/Lyst/Kmt5c/Cd74/H2-M5/Jak2/H2-DMa/Socs5/Nlrp3/Pms2/Irf1/Ighg3/Gcnt3/Bcl6/Stard7/Bach2/Foxj1/Anxa1/Il12b/Iglc2/Tnfsf13/H2-T24/Il31ra/Tnfrsf1b/Icosl/Stx11/Cfh/Ephb6/Cd274/Slc11a1/Mbl2/Ighg2b/Fosl2/Il20rb/Ada/Zp3r/Emp2/C1qb/Spn/C4…
BP	GO:0099177	regulation of trans-synaptic signaling	436	-0.408657	-1.37393	3.50789e-05	0.000808257	0.000610871	4212	tags=39%, list=29%, signal=29%	Homer1/Sorcs3/Ephb1/Penk/Atp2a2/Nf1/Cplx2/F2r/Rapgef2/Kcnc3/Synpo/Stat3/Rhot1/Slc38a1/Dbi/Neo1/Dbn1/Slc1a3/Nos1/Camk2d/Pla2g6/Ssh1/Myo5b/Shisa8/Grik2/Stxbp1/Myo5a/Htr7/Nsmf/Slc30a1/Flot1/Pacsin2/Gnao1/Prnp/Akap5/Snap47/Pclo/Unc13a/Ptger4/Map1b/Tnr/Igf1r/Cacnb3/Sybu/Tspoap1/Ica1/Ngfr/Micu3/Neurl1a/Dag1/Eif2ak4/Enpp1/Slc7a11/Git1/Fyn/Nxph1/Calb1/Unc13c/Serpine2/Cacna2d2/Cdh2/Atp1a3/Syde1/Sipa1l1/Mc…
BP	GO:0070661	leukocyte proliferation	238	-0.408312	-1.35264	0.00405275	0.0321504	0.0242989	2561	tags=29%, list=18%, signal=24%	Efnb1/Ahr/Cd55/Hhex/Slc7a1/Il6st/Kit/Tarm1/Cd74/Sh3rf1/Jak2/Rassf5/Btn2a2/Il2ra/Csf1/Slc4a2/Kitl/Dock2/Prdx2/Cblb/Gstp1/Fkbp1b/Bmi1/Irf1/Spta1/Igf2/Fgf10/Zbtb32/Mapk3/Bcl6/Cxcl12/Foxj1/Lrrc32/Anxa1/Il7/Il12b/Ticam1/Tnfrsf1b/Icosl/Ephb6/Tirap/Cd274/Slc11a1/Fosl2/St6gal1/Cd180/Shh/Il20rb/Flt3/Ada/Pla2g5/Emp2/Spn/Zc3h12d/Nfix/Tnfrsf13c/Itgb2/Ephb2/Aif1/Igfbp2/Stat4/Nfkbiz/Ighm/Mpl/Prlr/Cd19/Laptm5/S…
BP	GO:0050804	modulation of chemical synaptic transmission	435	-0.407133	-1.36857	4.4059e-05	0.000928859	0.000702021	4212	tags=39%, list=29%, signal=29%	Homer1/Sorcs3/Ephb1/Penk/Atp2a2/Nf1/Cplx2/F2r/Rapgef2/Kcnc3/Synpo/Stat3/Rhot1/Slc38a1/Dbi/Neo1/Dbn1/Slc1a3/Nos1/Camk2d/Pla2g6/Ssh1/Myo5b/Shisa8/Grik2/Stxbp1/Myo5a/Htr7/Nsmf/Slc30a1/Flot1/Pacsin2/Gnao1/Prnp/Akap5/Snap47/Pclo/Unc13a/Ptger4/Map1b/Tnr/Igf1r/Cacnb3/Sybu/Tspoap1/Ica1/Ngfr/Micu3/Neurl1a/Dag1/Eif2ak4/Enpp1/Slc7a11/Git1/Fyn/Nxph1/Calb1/Unc13c/Serpine2/Cacna2d2/Cdh2/Atp1a3/Syde1/Sipa1l1/Mc…
BP	GO:0042886	amide transport	273	-0.406892	-1.35189	0.00120574	0.0135448	0.010237	4402	tags=42%, list=30%, signal=30%	Ucp2/Slc14a2/Slc25a39/Rph3al/Lrrc8a/Ffar2/Itpr1/Gltp/Lrp5/Cyb5r4/Sfrp1/Stxbp3/C1qtnf12/Pax8/Nos1/Pla2g6/Ppard/Ptger3/Cert1/Gpr27/Raf1/Myo5a/Capn10/Gnao1/Aqp1/Gipr/Pclo/Irs2/Ptger4/Gnas/Plekha8/Brsk2/Sybu/Ncoa6/F2/Abcc4/Slc15a5/Gpr68/Stxbp4/Slc25a40/Slco3a1/Slc7a11/Cdh17/Myrip/Smpd3/Lrp1/Prkd1/Hnf1a/Clock/Rab11fip2/Slc16a10/Madd/Pdx1/Prkaca/Rab8b/Ccdc186/Midn/Pde3b/Sytl4/Hif1a/Cask/Tm7sf3/Bmal1/Cd…
BP	GO:0001503	ossification	321	-0.406247	-1.35794	0.000362276	0.00536099	0.00405177	4203	tags=43%, list=29%, signal=31%	Cthrc1/Lrp5/Penk/Nf1/Apc/Snai1/Sfrp1/Smad6/Ext1/Id2/Sema4d/Suco/Zhx3/Comp/Trp53inp2/Hdac8/Scube3/Actn3/Kl/Fgf9/Clic1/Srgn/Axin2/Mmp16/Id1/Ctnnbip1/Sort1/Ptger4/Gnas/Tfap2a/Mtss1/Noct/Akt1/Nab2/Bmp6/Smad3/Sost/Enpp1/Adamts7/Col1a1/Ccn2/Git1/Smpd3/Nab1/Sgms2/Bmpr2/Bmpr1b/Prickle1/Fbxl15/Prkd1/Slc26a2/Limd1/Mapk8/Acvr1/Slc24a3/Bmp2k/Gfra4/Foxc2/Prkaca/Tmt1a2/Ahr/Chsy1/Nfe2/Hey1/Smad7/Il6st/Mn1/Hif1a…
BP	GO:0007268	chemical synaptic transmission	567	-0.405788	-1.37326	2.80314e-06	0.00010522	7.95242e-05	4320	tags=40%, list=30%, signal=29%	Atad1/Rph3al/Gnai2/Dmd/Disc1/Homer1/Sorcs3/Ephb1/Penk/Atp2a2/Nf1/Cplx2/F2r/Rapgef2/Kcnc3/Etv5/Synpo/Ext1/Stat3/Stxbp3/Rhot1/Gabra3/Aph1b/Slc38a1/Dbi/Neo1/Dbn1/Rac3/Slc1a3/Nos1/Camk2d/Pla2g6/Ssh1/Myo5b/Shisa8/Grik2/Synj1/Stxbp1/Myo5a/Htr7/Nsmf/Slc30a1/Flot1/Pacsin2/Gnao1/Prnp/Akap5/Snap47/Pclo/Unc13a/Dcdc2a/Ptger4/Map1b/Tnr/Efr3a/Chrnd/Igf1r/Cacnb3/Sybu/Erc2/Tspoap1/Ica1/Ngfr/Micu3/Insyn1/Neurl1a/…
BP	GO:0098916	anterograde trans-synaptic signaling	567	-0.405788	-1.37326	2.80314e-06	0.00010522	7.95242e-05	4320	tags=40%, list=30%, signal=29%	Atad1/Rph3al/Gnai2/Dmd/Disc1/Homer1/Sorcs3/Ephb1/Penk/Atp2a2/Nf1/Cplx2/F2r/Rapgef2/Kcnc3/Etv5/Synpo/Ext1/Stat3/Stxbp3/Rhot1/Gabra3/Aph1b/Slc38a1/Dbi/Neo1/Dbn1/Rac3/Slc1a3/Nos1/Camk2d/Pla2g6/Ssh1/Myo5b/Shisa8/Grik2/Synj1/Stxbp1/Myo5a/Htr7/Nsmf/Slc30a1/Flot1/Pacsin2/Gnao1/Prnp/Akap5/Snap47/Pclo/Unc13a/Dcdc2a/Ptger4/Map1b/Tnr/Efr3a/Chrnd/Igf1r/Cacnb3/Sybu/Erc2/Tspoap1/Ica1/Ngfr/Micu3/Insyn1/Neurl1a/…
BP	GO:0099537	trans-synaptic signaling	573	-0.405317	-1.37216	6.32524e-06	0.00022124	0.00016721	4320	tags=40%, list=30%, signal=30%	Atad1/Rph3al/Gnai2/Dmd/Disc1/Homer1/Sorcs3/Ephb1/Penk/Atp2a2/Nf1/Cplx2/F2r/Rapgef2/Kcnc3/Etv5/Synpo/Ext1/Stat3/Stxbp3/Rhot1/Gabra3/Aph1b/Slc38a1/Dbi/Neo1/Dbn1/Rac3/Slc1a3/Nos1/Camk2d/Pla2g6/Ssh1/Myo5b/Shisa8/Grik2/Synj1/Stxbp1/Myo5a/Htr7/Nsmf/Slc30a1/Flot1/Pacsin2/Gnao1/Prnp/Akap5/Snap47/Pclo/Unc13a/Dcdc2a/Ptger4/Map1b/Tnr/Efr3a/Chrnd/Igf1r/Cacnb3/Sybu/Erc2/Tspoap1/Ica1/Ngfr/Micu3/Insyn1/Neurl1a/…
BP	GO:0099536	synaptic signaling	600	-0.404919	-1.37201	1.12088e-06	5.07365e-05	3.8346e-05	5324	tags=50%, list=37%, signal=33%	Dmxl2/L1cam/Faah/Nptn/Kras/Abi1/Snap29/Nefh/Lrrtm2/Syt1/Lrp6/Cacnb4/Gnaq/Bcr/Reln/Arid1b/Slc6a9/Pnkd/Rin1/Vamp1/Atg5/Dnm1l/Ctbp2/Clstn1/Rimbp2/Abr/Prkar2a/Ophn1/Cpeb1/Rims1/Kcnma1/Unc13b/Ace/Zdhhc12/Vps13a/Nisch/Grm4/Syt9/Mdm2/Cx3cl1/Asic1/Lama2/Hmgcr/Cyp46a1/Stau1/Il1rap/Eea1/Lypd1/Tmod2/Ppt1/Large1/Crkl/Dcc/Kcmf1/Igsf9b/Trio/Xbp1/Rab3gap2/Sorbs1/Adarb1/Prr7/Atad1/Rph3al/Gnai2/Dmd/Rgs10/Disc1/It…
BP	GO:0007169	cell surface receptor protein tyrosine kinase signaling pathway	493	-0.404426	-1.36375	3.84464e-05	0.000845272	0.000638847	4403	tags=41%, list=30%, signal=30%	Sorbs1/Sh3glb1/Gfra3/Gfra1/Fgf7/Gnai2/Stat5b/Tiparp/Epha3/Efnb2/Yes1/Igfbp4/Ephb1/Esr1/Apc/Rela/Pip4k2b/Plekha1/Rapgef2/Gsk3a/Ext1/Stat3/C1qtnf12/Phip/Rala/Adgra2/Gkap1/Cdk5r1/Ptpre/Ceacam2/Socs2/Stat6/Fgf8/Dok3/Garem1/Akt2/Raf1/Jak1/Crk/Kl/Osbpl8/Fgf9/Klb/Sort1/Irs2/Pik3r1/Myo1e/Igf1r/Tfap2a/Opa1/Sema6a/Txnip/Gab2/Dstyk/Stxbp4/Efna4/Ngfr/Sorl1/Akt1/Ccdc88a/Src/Errfi1/Enpp1/Col1a1/Ccn2/Git1/Smpd3…
BP	GO:0070588	calcium ion transmembrane transport	229	-0.403946	-1.3359	0.00465228	0.0350973	0.0265261	4253	tags=40%, list=29%, signal=29%	Dmd/Itpr1/Slc25a23/Atp2a2/F2r/Tmbim6/Gas6/Letm2/Atp2b4/Dbi/Plch1/Camk2d/Plch2/Ptger3/Micu2/Myo5a/Cacna1h/Prnp/Akap5/Bin1/Nol3/Casq2/Cacnb3/Opa1/F2/Akt1/Micu3/Nipsnap2/Ccn2/Fyn/Akap6/Atp2c1/Cacna2d2/Prkd1/G6pdx/Cnga1/Slc24a3/Ppp3r1/Tlr9/Ubash3b/Itgb3/Ahr/Hspa2/Tgfb2/Trpv2/Cacng4/Gpr35/Grin3a/Fkbp1b/Plce1/Grin2b/Cacna1g/Ank2/Gstm7/Ptk2b/Ehd3/Agtr1a/Orai2/Gpm6a/Mcub/Trpm6/Smim6/Pde4d/Mcu/C2cd6/Gnb5/…
BP	GO:0007160	cell-matrix adhesion	190	-0.403377	-1.32756	0.0070342	0.0483287	0.0365263	4577	tags=44%, list=31%, signal=31%	Npnt/Camsap3/Clasp1/Tnn/Sorbs1/Rock1/Pip5k1a/Dmd/Epha3/Bcl2l11/Disc1/Nf1/Sdc4/Dlc1/Rasa1/Whamm/Actn3/Zyx/Itga6/Limch1/Pik3r1/Plau/Epb41l5/Onecut2/Nid2/Smad3/Dag1/Src/Ccn2/Itga4/Lrp1/Peak1/Tnxb/Acvrl1/Pcsk5/Hpse/Itgb3/Zfp469/Slk/Cask/Col13a1/Csf1/Vwa2/Plekha2/Trem1/Sema3e/Sirpa/Efemp2/Cdk6/Strc/Plet1/Cdk5/Tmem8b/Rras/Bcl6/Ptk2b/Enpp2/Col16a1/Onecut1/Thsd1/Postn/Adam8/Hoxa7/Itga10/Tek/Cd36/Ninj1/It…
BP	GO:0090287	regulation of cellular response to growth factor stimulus	261	-0.402083	-1.33324	0.00375531	0.0307723	0.0232574	3298	tags=34%, list=23%, signal=27%	Sema6a/Ngly1/Dstyk/Ngfr/Sorl1/Onecut2/Zfp703/Smad3/Tsc22d1/Sost/Lrp1/Fbxl15/Smoc2/Spart/Acvrl1/Vegfb/Chst11/Pbld2/Prdm16/Pdgfb/Hhex/Bmper/Notch2/Smad7/Hif1a/Dand5/Fam20c/Cask/Ltbp1/Ppp2r5b/Rasl11b/Crim1/Wasf1/Flcn/Wfikkn1/Tob1/Chrdl2/Foxd1/Spry4/Kcp/Fbn2/Tmem53/Sfrp2/Ccbe1/Slc9a6/Men1/Tgfbr3/Prkd2/Fgfrl1/Peg10/Fgf10/Cxcl13/Myof/Myocd/Spry1/Il12b/Onecut1/Slit2/Adgrg1/Cyfip2/Sulf1/Rgma/Pmepa1/Tek/I…
BP	GO:0048598	embryonic morphogenesis	532	-0.399662	-1.35	2.19212e-05	0.000551073	0.000416495	4203	tags=38%, list=29%, signal=28%	Eya1/Cthrc1/Lrp5/Snai1/Sdc4/Myo7a/Sfrp1/Dlc1/Ext1/Tgfbr1/Lmbr1/Id2/Nckap1/Rbpms2/Lrig1/Rala/Sufu/Sparc/Fzd3/Cited2/Ttbk2/Fzd7/Pax8/Kdm6b/Fgf8/Gna12/Dusp1/Rnf207/Klf4/Hipk2/Gja5/Lhfpl5/Cobl/Fgf9/Mmp16/Esx1/Pals1/Stil/Gnas/Tfap2a/Opa1/Aff3/Hsbp1/Mbnl1/Epb41l5/Pax3/Smad3/Dag1/Insig1/Prrx1/Acd/Enpp1/Gbx2/Adm/Itga4/Bmpr2/Prickle1/Phactr4/C2cd3/Pou2f1/Mmp15/Hnf1a/Lmx1b/Fzd5/Acvr1/Mesp2/Pdx1/Hoxd9/Chst1…
BP	GO:0051960	regulation of nervous system development	444	-0.399125	-1.34213	0.000116765	0.00213931	0.00161686	4196	tags=36%, list=29%, signal=26%	Ephb1/Plxna1/Nf1/Rela/Cdh4/Rapgef2/Etv5/Id2/Casz1/Sema4d/Jade2/Lig4/Dbn1/Fzd3/Arhgap4/Nos1/Eef2k/Myo5b/Prtg/E2f1/Draxin/Synj1/Slc30a1/Akap5/Bin1/Adgrl2/Id1/Tiam2/Pik3r1/Map2/Map1b/Tnr/Opa1/Plxna4/Dixdc1/Ss18l1/F2/Tnik/Ngfr/Sorl1/Akt1/Dscam/Neurl1a/Dag1/Gbx2/Lrp1/Bmpr2/Serpine2/Cdh2/Xlr3b/Ncmap/Spart/Pard3/Ctf2/Mtmr2/Mapk8/Lingo2/Parp6/Bhlhe40/Pak1/Ankrd27/Syngap1/Dpysl5/Hey1/Notch2/Rara/Il6st/Kit…
BP	GO:0030900	forebrain development	366	-0.397624	-1.33353	0.000480845	0.00654885	0.00494954	4562	tags=40%, list=31%, signal=28%	Kif3a/Large1/Robo1/Crkl/Lef1/Tacc2/Sox1/Usp9x/Dmd/Fos/Disc1/Gli1/B2m/Aplp1/Plxna1/Nf1/Rapgef2/Dlc1/Ext1/Id2/D16Ertd472e/Cdk5r1/Atp2b4/Scyl2/Dbi/Rac3/Ttbk2/Gdpd5/Nde1/Kdm6b/E2f1/Fgf8/Mrtfb/Draxin/Ptger3/Wdr47/Crk/Aqp1/Pals1/Stil/Bbs2/Mapk8ip3/Kif26a/Tnr/Kif21b/Tfap2a/Plxna4/Dixdc1/Rax/Btbd3/Pex13/Ppp1r9b/Agtpbp1/Arx/Src/Slc7a11/Gbx2/Fyn/Cep120/Cdh2/Atp1a3/Sall3/Prdm13/Nfib/Tubb2b/Slc38a2/Cdk5r2/Mf…
BP	GO:0046879	hormone secretion	266	-0.396746	-1.31734	0.00427583	0.0331672	0.0250674	4317	tags=39%, list=30%, signal=28%	Rph3al/Lrrc8a/Ffar2/Itpr1/Lrp5/Cyb5r4/Sfrp1/Stxbp3/C1qtnf12/Dab2/Pax8/Nos1/Pla2g6/Ppard/Ptger3/Gpr27/Raf1/Myo5a/Capn10/Gnao1/Aqp1/Gipr/Pclo/Irs2/Ptger4/Gnas/Nell2/Brsk2/Sybu/Ncoa6/F2/Gpr68/Stxbp4/Bmp6/Myrip/Smpd3/Lrp1/Prkd1/Hnf1a/Clock/Rab11fip2/Slc16a10/Madd/Pdx1/Prkaca/Rab8b/Ccdc186/Gdf9/Midn/Pde3b/Sytl4/Hif1a/Cask/Tm7sf3/Bmal1/Gck/Jak2/Abat/Foxo1/Foxd1/Gnaz/Baiap3/Vamp2/Rapgef4/Adcy8/Syt7/Nlgn…
BP	GO:0048667	cell morphogenesis involved in neuron differentiation	549	-0.396533	-1.3407	3.90077e-05	0.000845533	0.000639044	4791	tags=44%, list=33%, signal=31%	Dip2a/Unc5b/Bbs1/Actr3/Plxna2/Cul7/Rbfox2/Apbb1/Lama2/Numb/Lgr4/Cntn6/Mycbp2/Adgrb3/Pls1/Hspg2/Robo1/Tnn/Dcc/Rab21/B4galt5/Trio/Plxnb1/Sh3glb1/Adarb1/Usp9x/Gfra3/Wasl/Epha3/Disc1/Efnb2/Aplp1/Unc5c/Sema5b/Vldlr/Ephb1/Plxna1/Prex2/Apc/Myo7a/Cdh4/Rapgef2/Ext1/Tubb3/Id2/Sema4d/Slit3/Lamc3/Gla/Cdk5r1/Spast/Dnm3/Neo1/Dbn1/Fzd3/Megf9/Rac3/Arhgap4/Slc1a3/Sema3c/Eef2k/Nectin1/Myo5b/Prtg/Nexn/Fgf8/Draxin/W…
BP	GO:0031589	cell-substrate adhesion	306	-0.39546	-1.32028	0.00190542	0.0191663	0.0144857	4580	tags=44%, list=31%, signal=31%	Alox15/Npnt/Camsap3/Clasp1/Crkl/Tnn/Antxr1/Fat2/Myo1g/Sorbs1/Gcnt2/Rock1/Pip5k1a/Dmd/Epha3/Bcl2l11/Disc1/Ephb1/Nf1/Sdc4/Sfrp1/Dlc1/Smad6/Gas6/Rasa1/Muc21/Whamm/Dab2/Dbn1/Lims2/Rac3/Fzd7/Tesk1/Ppard/Actn3/Zyx/Dock1/Itga6/Crk/Limch1/Akip1/Pik3r1/Plau/Epb41l5/Onecut2/Nid2/Smad3/Dag1/Src/Col1a1/Ccn2/Itga4/Lrp1/Peak1/Smoc2/Tnxb/Acvrl1/Pcsk5/Cspg5/Hpse/Carmil1/Spock1/Itgb3/Zfp469/Pdgfb/Triobp/Slk/Cask/…
BP	GO:0050767	regulation of neurogenesis	369	-0.395375	-1.32548	0.000929623	0.0112653	0.00851416	4187	tags=36%, list=29%, signal=26%	Plxna1/Nf1/Rela/Cdh4/Rapgef2/Etv5/Id2/Casz1/Sema4d/Jade2/Lig4/Dbn1/Fzd3/Arhgap4/Nos1/Eef2k/Myo5b/Prtg/E2f1/Draxin/Synj1/Slc30a1/Akap5/Bin1/Id1/Tiam2/Map2/Map1b/Tnr/Opa1/Plxna4/Dixdc1/Ss18l1/F2/Tnik/Sorl1/Dscam/Neurl1a/Dag1/Lrp1/Bmpr2/Serpine2/Xlr3b/Spart/Ctf2/Mapk8/Parp6/Bhlhe40/Pak1/Ankrd27/Syngap1/Dpysl5/Hey1/Notch2/Il6st/Kit/Hif1a/Cask/Bmal1/Vim/Rb1/Wls/Helt/Bmp7/Pou4f1/Ryk/Gfap/Trpv2/Mbp/Lhx2…
BP	GO:0008015	blood circulation	342	-0.394945	-1.32194	0.00102166	0.0120026	0.0090714	4191	tags=41%, list=29%, signal=30%	Lrp5/Atp2a2/Slc23a2/Dsp/F2r/Serpinf2/Gsk3a/Smad6/Gas6/Ext1/Id2/Comp/Dbh/Atp2b4/Nos1/Camk2d/Pla2g6/Ppard/Ptger3/Gna12/Rnf207/Gja5/Kl/Htr7/Ptprm/Cacna1h/Gnao1/Bin1/Ctnnbip1/Mdm4/Bbs2/Pik3r1/E2f4/Gnas/Casq2/Tmem65/Tacr3/Enpep/Akt1/Bmp6/Adrb3/Smad3/Sh3gl2/Src/Ccn2/Smpd3/Adm/Itga4/Bmpr2/Kcnd3/Akap6/Atp1a3/Tbxa2r/G6pdx/Gclc/Acvrl1/Pde5a/Vegfb/Nr3c1/Foxc2/Wdr35/Ahr/Tjp3/Pdgfb/Gclm/Smad7/Adh5/Nav2/Nos1ap…
BP	GO:0003013	circulatory system process	365	-0.394481	-1.32287	0.00151868	0.0162308	0.0122671	4191	tags=41%, list=29%, signal=30%	Lrp5/Atp2a2/Slc23a2/Dsp/F2r/Serpinf2/Gsk3a/Smad6/Gas6/Ext1/Id2/Comp/Dbh/Atp2b4/Nos1/Camk2d/Pla2g6/Ppard/Ptger3/Gna12/Rnf207/Gja5/Kl/Htr7/Ptprm/Cacna1h/Gnao1/Bin1/Ctnnbip1/Mdm4/Bbs2/Pik3r1/E2f4/Gnas/Casq2/Tmem65/Tacr3/Enpep/Akt1/Bmp6/Adrb3/Smad3/Sh3gl2/Src/Ccn2/Smpd3/Fyn/Adm/Itga4/Lrp1/Bmpr2/Kcnd3/Akap6/Atp1a3/Tbxa2r/G6pdx/Gclc/Acvrl1/Pde5a/Vegfb/Nr3c1/Foxc2/Wdr35/Mfsd2a/Ahr/Tjp3/Pdgfb/Gclm/Smad7/…
BP	GO:0042063	gliogenesis	301	-0.394414	-1.31589	0.00360732	0.0305036	0.0230543	4870	tags=42%, list=33%, signal=28%	Vps13a/Cul4b/Gpc1/Lepr/Actr3/Cx3cl1/Prkci/Lama2/Mmp24/Large1/Crkl/B4galt5/Lef1/Pax2/Il34/Sox1/Dmd/Disc1/Penk/Nf1/Rela/Etv5/Stat3/Id2/Mxra8/Casz1/Lamc3/Cdk5r1/Dbi/E2f1/Synj1/Wdr47/Akt2/Raf1/Myd88/Bin1/Wdr1/Pals1/F2/B4galt6/Cntnap1/Akt1/Nab2/Dag1/Enpp1/Nab1/Lrp1/Serpine2/Cdh2/Ncmap/Pard3/Nfib/Cspg5/Ppp3r1/Cdk5r2/Nr3c1/Kcnj10/Pdgfb/Notch2/Il6st/Vim/Rb1/Dner/Nlgn3/Csf1/Pou3f1/Tgfb2/Gfap/Dhh/Cdk6/Exoc…
BP	GO:0034762	regulation of transmembrane transport	331	-0.394226	-1.31829	0.00129778	0.0142663	0.0107823	4425	tags=40%, list=30%, signal=28%	Slc9a1/Sorbs1/Ucp2/Wnk2/Slc31a2/Dmd/Yes1/Oaz2/Homer1/Esr1/F2r/Tmbim6/Gsk3a/Rasa1/Prss8/Stxbp3/C1qtnf12/Lcn2/Slc38a1/Atp2b4/Dbi/Tesc/Nfe2l2/Nos1/Camk2d/Ptger3/Rnf207/Akt2/Myo5a/Osbpl8/Slc30a1/Capn10/Prnp/Akap5/Bin1/Irs2/Nol3/Casq2/Cacnb3/Ripk1/F2/Stxbp4/Akt1/Nipsnap2/Enpp1/Fyn/Akap6/Prkd1/G6pdx/Kcnab1/Fxyd6/Ppp3r1/Tlr9/C2cd5/Ubash3b/Itgb3/Kcnj10/Ahr/Slc43a2/Hspa2/Dpp6/Cttnbp2nl/Trib3/Aoc3/Ikbkb/St…
BP	GO:0009914	hormone transport	272	-0.394157	-1.30918	0.00464763	0.0350973	0.0265261	4317	tags=38%, list=30%, signal=27%	Rph3al/Lrrc8a/Ffar2/Itpr1/Lrp5/Cyb5r4/Sfrp1/Stxbp3/C1qtnf12/Dab2/Pax8/Nos1/Pla2g6/Ppard/Ptger3/Gpr27/Raf1/Myo5a/Capn10/Gnao1/Aqp1/Gipr/Pclo/Irs2/Ptger4/Gnas/Nell2/Brsk2/Sybu/Ncoa6/F2/Gpr68/Stxbp4/Bmp6/Myrip/Smpd3/Lrp1/Prkd1/Hnf1a/Clock/Rab11fip2/Slc16a10/Madd/Pdx1/Prkaca/Rab8b/Ccdc186/Gdf9/Midn/Pde3b/Sytl4/Hif1a/Cask/Tm7sf3/Bmal1/Gck/Jak2/Abat/Foxo1/Foxd1/Gnaz/Baiap3/Vamp2/Rapgef4/Adcy8/Syt7/Nlgn…
BP	GO:0007267	cell-cell signaling	887	-0.393753	-1.34134	1.38055e-07	1.06233e-05	8.029e-06	4343	tags=39%, list=30%, signal=29%	Fgf7/Prr7/Atad1/Rph3al/Gnai2/Lrrc8a/Dmd/Rgs10/Ffar2/Disc1/Itpr1/Homer1/Sorcs3/Ephb1/Lrp5/Penk/Atp2a2/Nf1/Cyb5r4/Rela/Cplx2/Sfrp1/F2r/Rapgef2/Kcnc3/Etv5/Synpo/Ext1/Stat3/Stxbp3/Rhot1/C1qtnf12/Gabra3/Aph1b/Dab2/Slc38a1/Cdk5r1/Dbi/Neo1/Dbn1/Rac3/Slc1a3/Pax8/Nos1/Camk2d/Pla2g6/Ssh1/Ppard/Myo5b/Shisa8/Grik2/Synj1/Ptger3/Gpr27/Raf1/Stxbp1/Gja5/Myo5a/Htr7/Nsmf/Slc30a1/Flot1/Pacsin2/Capn10/Fgf9/Gnao1/Aqp…
BP	GO:0048812	neuron projection morphogenesis	598	-0.393265	-1.33243	2.66684e-05	0.000641293	0.000484681	4791	tags=43%, list=33%, signal=30%	Dip2a/Unc5b/Spag6l/Actr3/Plxna2/Cul7/Rbfox2/Apbb1/Lama2/Numb/Lgr4/Cntn6/Mycbp2/Adgrb3/Hspg2/Robo1/Tnn/Dcc/Rab21/B4galt5/Trio/Plxnb1/Sh3glb1/Adarb1/Usp9x/Gfra3/Rock1/Wasl/Dmd/Epha3/Disc1/Efnb2/Aplp1/Unc5c/Sema5b/Ppp1r12a/Vldlr/Ephb1/Plxna1/Prex2/Apc/Slc23a2/Cdh4/Rapgef2/Ext1/Tubb3/Nckap1/Sema4d/Slit3/Lamc3/Gla/Cdk5r1/Spast/Dnm3/Jade2/Neo1/Dbn1/Fzd3/Megf9/Epb41l3/Rac3/Arhgap4/Sema3c/Eef2k/Nectin1/M…
BP	GO:0043269	regulation of monoatomic ion transport	320	-0.392983	-1.31343	0.00246039	0.0225389	0.0170346	4425	tags=39%, list=30%, signal=28%	Slc9a1/Ucp2/Wnk2/Slc31a2/Gnai2/Cd84/Dmd/Pdzk1/Itpr1/B2m/Wfs1/Homer1/F2r/Tmbim6/Prss8/Lcn2/Atp2b4/Dbi/Tesc/Nos1/Camk2d/Ptger3/Rnf207/Akt2/Myo5a/Htr7/Slc30a1/Gnao1/Prnp/Akap5/Bin1/Nol3/Gnas/Casq2/Cacnb3/Ripk1/Pacsin3/F2/Akt1/Nipsnap2/Fyn/Akap6/Egf/Serpine2/Prkd1/G6pdx/Kcnab1/Fxyd6/Ppp3r1/Tlr9/Ubash3b/Itgb3/Kcnj10/Ahr/Pdgfb/Hspa2/Dpp6/Cask/Ikbkb/Gck/Stom/Nlgn3/Scn10a/Dmpk/Cnksr3/Tgfb2/Trpv2/Vamp2/Gp…
BP	GO:0051962	positive regulation of nervous system development	294	-0.392983	-1.30905	0.00371831	0.0307723	0.0232574	4772	tags=40%, list=33%, signal=28%	Actr3/Plxna2/Cul7/Cx3cl1/Prkci/Numb/Man2a1/Il1rap/Adgrl4/Adgrb3/Robo1/Rab21/Plxnb1/Il34/Sh3glb1/Disc1/Ephb1/Plxna1/Rela/Cdh4/Etv5/Id2/Sema4d/Jade2/Lig4/Dbn1/Fzd3/Eef2k/Myo5b/E2f1/Synj1/Slc30a1/Akap5/Bin1/Adgrl2/Tiam2/Pik3r1/Map1b/Opa1/Plxna4/Dixdc1/Ss18l1/Tnik/Dscam/Neurl1a/Dag1/Lrp1/Bmpr2/Serpine2/Xlr3b/Ctf2/Mapk8/Lingo2/Parp6/Pak1/Ankrd27/Notch2/Il6st/Kit/Hif1a/Cask/Musk/Vim/Nlgn3/Wls/Gfap/Trpv…
BP	GO:0048858	cell projection morphogenesis	619	-0.392413	-1.33129	1.34076e-05	0.000404595	0.000305788	4791	tags=42%, list=33%, signal=30%	Dip2a/Unc5b/Spag6l/Actr3/Plxna2/Cul7/Rbfox2/Apbb1/Lama2/Numb/Lgr4/Cntn6/Mycbp2/Adgrb3/Hspg2/Robo1/Tnn/Dcc/Rab21/B4galt5/Trio/Plxnb1/Sh3glb1/Adarb1/Usp9x/Gfra3/Rock1/Wasl/Dmd/Epha3/Disc1/Efnb2/Aplp1/Unc5c/Sema5b/Ppp1r12a/Vldlr/Ephb1/Plxna1/Prex2/Apc/Slc23a2/Cdh4/Rapgef2/Ext1/Tubb3/Nckap1/Sema4d/Slit3/Lamc3/Gla/Cdk5r1/Spast/Dnm3/Jade2/Neo1/Dbn1/Fzd3/Megf9/Epb41l3/Rac3/Arhgap4/Sema3c/Eef2k/Nectin1/M…
BP	GO:0048568	embryonic organ development	414	-0.392369	-1.31671	0.0004443	0.00627319	0.0047412	4465	tags=40%, list=31%, signal=29%	Lef1/Pax2/Myo15a/Prdm1/Ttpa/Flvcr1/Ggnbp2/Plk4/Gli1/Phlda2/Eya1/Cthrc1/Snai1/Myo7a/Tgfbr1/Id2/Nckap1/Rbpms2/Lrig1/Sufu/Sparc/Fzd3/Cited2/Ttbk2/Pax8/Fgf8/Mrtfb/Rnf207/Hipk2/Gja5/Lhfpl5/Cobl/Fgf9/Mmp16/Esx1/Stil/Gnas/Tfap2a/Plxna4/Vash2/Ncoa6/Akt1/Nrk/Smad3/Insig1/Prrx1/Enpp1/Gbx2/Adm/Itga4/Prickle1/Phactr4/Syde1/C2cd3/Pbx3/Pcsk5/Fzd5/Acvr1/Tubb2b/Hoxd9/Chst11/Foxc2/Cdx2/Tbx4/Ift122/Pdgfb/Hhex/Zic3…
BP	GO:0051241	negative regulation of multicellular organismal process	849	-0.392229	-1.33535	1.51447e-06	6.29938e-05	4.76099e-05	3481	tags=32%, list=24%, signal=26%	Bin1/Srgn/Id1/Il4i1/Oas1h/Bbs2/Stard13/Pik3r1/Ptger4/Plau/Map2/Nol3/Gnas/Wwc2/Tnr/Cacnb3/Sema6a/Nav3/F2/Anxa4/Gpr68/Ngfr/Sorl1/Adrb3/Smad3/Klhl22/Tsc22d1/Sost/Errfi1/Enpp1/Adamts7/Git1/Fyn/Adm/Itga4/Bmpr2/Prickle1/Arrdc3/Serpine2/Ism1/Hspb1/G6pdx/Cd200/Bst2/Gclc/Spart/Nras/Pde5a/Lrrc17/Nfib/Chadl/Cd160/Nrarp/Mtmr2/Zfp750/Laptm4b/Gnrh1/Mill1/Sfmbt1/Eppk1/Gfra4/Foxc2/Cdkn1b/Prdm16/Ubash3b/Ahr/Pak1/…
BP	GO:0045596	negative regulation of cell differentiation	541	-0.391619	-1.32301	7.05043e-05	0.00140917	0.00106503	4196	tags=37%, list=29%, signal=27%	Ephb1/Lrp5/Nf1/Shb/Snai1/Sfrp1/Rapgef2/Pias3/Gsk3a/Smad6/Stat3/Tgfbr1/Id2/Casz1/Sema4d/Rbpms2/Nfe2l2/Arhgap4/Fzd7/Hdac8/Eif4enif1/Rora/Zfp418/Ppard/Prtg/E2f1/Draxin/Ptger3/Fgf9/Axin2/Iqcb1/Id1/Itpkb/Sort1/Pik3r1/Map2/Tnr/Dixdc1/Noct/F2/Gpr68/Tmsb4x/Tent5c/Sorl1/Smarca2/Smad3/Eif2ak4/Insig1/Tsc22d1/Enpp1/Adamts7/Bmpr2/Prickle1/Bcl7c/Hspb1/G6pdx/Spart/Acvrl1/Limd1/Lrrc17/Chadl/Nrarp/Zfp750/Meis1/Us…
BP	GO:0001501	skeletal system development	409	-0.391083	-1.31227	0.000480845	0.00654885	0.00494954	3142	tags=32%, list=22%, signal=26%	Nab2/Bmp6/Smad9/Smad3/Insig1/Prrx1/Src/Errfi1/Acd/Enpp1/Adamts7/Col1a1/Ccn2/Smpd3/Nab1/Bmpr2/Bmpr1b/Spef2/Slc26a2/Pcsk5/Lrrc17/Nfib/Chadl/Hoxd9/Evc/Chst11/Foxc2/Arid5b/Chsy1/Tbx4/Zic3/Eif4a3l1/Notch2/Smad7/Rara/Wnt2b/Hif1a/Fam20c/Trps1/Col5a2/Rb1/Rspo2/Col13a1/Fbxw4/Ranbp3l/Smad5/Wfikkn1/Amer1/Bmp7/Chrdl2/Ryk/Tgfb2/Tulp3/Tmem107/Snai2/Pbx1/Npr2/Fbn2/Sfrp2/Bmi1/Timp3/Trp63/Men1/Hsd17b7/Mdk/Creb3l2…
BP	GO:0120039	plasma membrane bounded cell projection morphogenesis	613	-0.390275	-1.32351	6.03519e-05	0.00122213	0.000923669	4791	tags=42%, list=33%, signal=30%	Dip2a/Unc5b/Spag6l/Actr3/Plxna2/Cul7/Rbfox2/Apbb1/Lama2/Numb/Lgr4/Cntn6/Mycbp2/Adgrb3/Hspg2/Robo1/Tnn/Dcc/Rab21/B4galt5/Trio/Plxnb1/Sh3glb1/Adarb1/Usp9x/Gfra3/Rock1/Wasl/Dmd/Epha3/Disc1/Efnb2/Aplp1/Unc5c/Sema5b/Ppp1r12a/Vldlr/Ephb1/Plxna1/Prex2/Apc/Slc23a2/Cdh4/Rapgef2/Ext1/Tubb3/Nckap1/Sema4d/Slit3/Lamc3/Gla/Cdk5r1/Spast/Dnm3/Jade2/Neo1/Dbn1/Fzd3/Megf9/Epb41l3/Rac3/Arhgap4/Sema3c/Eef2k/Nectin1/M…
BP	GO:0007167	enzyme-linked receptor protein signaling pathway	760	-0.38787	-1.32034	7.29439e-06	0.000244045	0.000184446	4403	tags=40%, list=30%, signal=29%	Sorbs1/Gcnt2/Sh3glb1/Usp9x/Gfra3/Gfra1/Fgf7/Eid2/Gnai2/Ldlrad4/Stat5b/Fos/Tiparp/Epha3/Efnb2/Zfyve9/Yes1/Igfbp4/Ephb1/Esr1/Apc/Rela/Pip4k2b/Sfrp1/Plekha1/Rapgef2/Sap30/Gsk3a/Smad6/Gas6/Smurf2/Ext1/Stat3/Tgfbr1/Rbpms2/C1qtnf12/Phip/Comp/Rala/Adgra2/Gkap1/Dab2/Cdk5r1/Neo1/Cited2/Ptpre/Scube3/Ceacam2/Usp15/Zyx/Socs2/Stat6/Fgf8/Dok3/Hipk2/Garem1/Akt2/Raf1/Jak1/Crk/Kl/Myd88/Osbpl8/Fgf9/Dcp1a/Id1/Klb/P…
BP	GO:0006954	inflammatory response	518	-0.386684	-1.30521	0.000230127	0.00376772	0.0028476	3130	tags=32%, list=21%, signal=26%	Ripk1/F2/Crlf2/Akt1/Bmp6/Bpgm/Nlrp9b/Smad3/Enpp1/Git1/Lrp1/Bmpr1b/Tbxa2r/Prkd1/Cd200/Camk1d/Pde5a/Clock/Mapk8/Cers6/Acvr1/Trim65/Fads2/Tlr9/Elf3/Fam114a1/Nr3c1/Slc7a2/Ahr/Macir/Nlrp9a/Pglyrp2/Notch2/Kit/Hif1a/Aoc3/Hmox1/Lbp/Tarm1/Nmi/Rb1/Jak2/Syt11/Ephx2/Nlrp4f/Socs5/Afap1l2/Il2ra/Csf1/Axl/Nlrp3/Cptp/Usp50/Scn9a/Adcy8/Prdx2/Nlrp4e/Sirpa/Naglu/Gstp1/Cd47/Epsti1/Cd200r3/Nlrp9c/Hdac7/Slc9a6/Armh4/Md…
BP	GO:0010959	regulation of metal ion transport	273	-0.386637	-1.2846	0.00725026	0.0493723	0.037315	4425	tags=39%, list=30%, signal=28%	Slc9a1/Ucp2/Wnk2/Slc31a2/Gnai2/Cd84/Dmd/Itpr1/B2m/Wfs1/Homer1/F2r/Tmbim6/Prss8/Lcn2/Atp2b4/Dbi/Tesc/Nos1/Camk2d/Ptger3/Rnf207/Akt2/Myo5a/Slc30a1/Gnao1/Prnp/Akap5/Bin1/Nol3/Gnas/Casq2/Cacnb3/Pacsin3/F2/Akt1/Nipsnap2/Fyn/Akap6/Egf/Serpine2/Prkd1/G6pdx/Kcnab1/Fxyd6/Ppp3r1/Tlr9/Ubash3b/Itgb3/Ahr/Pdgfb/Hspa2/Dpp6/Cask/Ikbkb/Gck/Dmpk/Cnksr3/Tgfb2/Trpv2/Vamp2/Gpr35/Nherf1/Lrrc26/Fkbp1b/Cntn1/Kcne3/Slc9a…
BP	GO:0034329	cell junction assembly	415	-0.385844	-1.29501	0.0011137	0.0127909	0.00966724	4772	tags=43%, list=33%, signal=30%	Actr3/Plxna2/Asic1/Numb/Prickle2/Lrfn4/Il1rap/Cdh3/Adgrl4/Mycbp2/Adgrb3/Sigmar1/Large1/Camsap3/Clasp1/Robo1/Crkl/Rhog/Plxnb1/Sorbs1/Usp9x/Rock1/Pip5k1a/Epha3/Efnb2/Vldlr/Ephb1/Plxna1/Snai1/Sdc4/Cdh4/Rapgef2/Dlc1/Rab13/Sema4d/Gabra3/Whamm/Colq/Dnm3/Epb41l3/Rac3/Nptxr/Nectin3/Eef2k/Nectin1/Actn3/Elmo1/Dock1/Csmd2/Cldn15/Crk/Gja5/Limch1/Marveld2/Flot1/Pkp4/Akap5/Wdr1/Adgrl2/Pclo/Sdk1/Pik3r1/Map1b/Pl…
BP	GO:0070848	response to growth factor	582	-0.385745	-1.30612	0.000134903	0.00235927	0.00178311	4398	tags=40%, list=30%, signal=29%	Gcnt2/Sh3glb1/Usp9x/Gfra1/Fgf7/Rock1/Foxo3/Eid2/Ldlrad4/Stat5b/Dmd/Fos/Zfyve9/Yes1/Penk/Rela/Sfrp1/Hyal2/Rapgef2/Sap30/Smad6/Gas6/Smurf2/Ext1/Stat3/Rasa1/Tgfbr1/Rbpms2/Pde8a/Comp/Adgra2/Dab2/Atp2b4/Sparc/Neo1/Dbn1/Cited2/Nos1/Scube3/Eef2k/Usp15/Zyx/E2f1/Fgf8/Dusp6/Bag4/Klf4/Hipk2/Garem1/Raf1/Crk/Kl/Micall1/Fgf9/Acap2/Dcp1a/Id1/Klb/Pals1/Sort1/Map1b/Igf1r/Sema6a/Ngly1/Ripk1/Dstyk/Ngfr/Sorl1/Akt1/E…
BP	GO:0050877	nervous system process	786	-0.385722	-1.31295	1.20183e-05	0.000369922	0.000279583	4839	tags=44%, list=33%, signal=31%	Wdr19/Loxhd1/Cln6/Cfap45/Grm4/Bbs1/Spag6l/Rbfox2/Cx3cl1/Tafa2/Asic1/Ccdc66/Hmgcr/Mmp24/Best2/Clcn1/Mc1r/Gpr155/Mycbp2/Eea1/Adgrb3/Tmod2/Ppt1/Tmem63b/Pias1/Jam2/Dop1b/Dnah9/Ppip5k2/Large1/Tnni3/Or6c217/Cdc14a/Tnnt1/Igsf9b/Lef1/Spag16/Ntan1/Atxn1l/Myo15a/Adarb1/Dnah11/Atad1/Dmd/Fos/Disc1/Itpr1/B2m/Cln5/Wfs1/Sema5b/B4galt2/Homer1/Sorcs3/Ephb1/Penk/Nf1/Myo7a/Tusc3/F2r/Abca4/Synpo/Lcn2/Lrig1/Comp/Lamc…
BP	GO:0071363	cellular response to growth factor stimulus	561	-0.383121	-1.29651	0.000148507	0.002568	0.00194086	4680	tags=42%, list=32%, signal=30%	Ireb2/Pik3cd/Cdh3/Gpr155/Gad2/Il17rd/Pdcd4/Npnt/Sap130/Robo1/Crkl/Lef1/Xbp1/Smad1/Gcnt2/Sh3glb1/Usp9x/Gfra1/Fgf7/Foxo3/Eid2/Ldlrad4/Stat5b/Dmd/Fos/Zfyve9/Yes1/Penk/Rela/Sfrp1/Hyal2/Rapgef2/Sap30/Smad6/Gas6/Smurf2/Ext1/Stat3/Rasa1/Tgfbr1/Rbpms2/Pde8a/Comp/Adgra2/Dab2/Atp2b4/Sparc/Neo1/Dbn1/Cited2/Nos1/Scube3/Eef2k/Usp15/Zyx/E2f1/Fgf8/Bag4/Klf4/Hipk2/Garem1/Raf1/Crk/Kl/Micall1/Fgf9/Acap2/Dcp1a/Id1/…
BP	GO:1903131	mononuclear cell differentiation	384	-0.381628	-1.27821	0.00331133	0.0284701	0.0215173	3586	tags=31%, list=25%, signal=24%	Kdelr1/Pou2f2/Myd88/Pde1b/Il4i1/Ctnnbip1/Itpkb/Pik3r1/Ptger4/Opa1/Nkx2-3/Ripk1/Gpr68/Smarca2/Enpp1/Cdh17/Hspb1/Rhoh/Wwp1/Fzd5/Nrarp/Gmpr2/Tlr9/Nr3c1/Dock11/Ahr/Nfil3/6030468B19Rik/Hhex/Polm/Pglyrp2/Notch2/Smad7/Rara/Aire/Kit/Mpzl2/Tmem176b/Cd74/Sh3rf1/Rb1/H2-DMa/Tcf7/Socs5/Btn2a2/Il2ra/Csf1/Zbtb46/Axl/Slc4a2/Nlrp3/Dock2/Kcnk18/Prdx2/Pbx1/Cdk6/Naglu/Lag3/Bmi1/Irf1/Epsti1/Hdac7/Men1/Mdk/Cyld/Bcl6/P…
BP	GO:0051051	negative regulation of transport	348	-0.380279	-1.27386	0.00375531	0.0307723	0.0232574	4314	tags=35%, list=30%, signal=25%	Gnai2/Cd84/Epha3/Ffar2/Oaz2/Esr1/Nf1/Sfrp1/F2r/Tmbim6/Gsk3a/Stxbp3/Neo1/Wdr41/Nos1/Camk2d/Tbc1d4/Ptger3/Ndfip2/Akt2/Myo5a/Htr7/Slc30a1/Pacsin2/Gnao1/Akap5/Bin1/Derl3/Irs2/Txn1/Ptger4/Map1b/Casq2/Os9/Pacsin3/Arfip1/Akt1/Insig1/Enpp1/Rhbdf2/Egf/Serpine2/Cd200/Ankrd13b/Kcnab1/Mtmr2/Madd/Ppp3r1/Tlr9/Itgb3/Ahr/Midn/Ankrd27/Pde3b/Slc43a2/Cttnbp2nl/Sytl4/Hmox1/Cd74/Gck/Syt11/Abat/Foxo1/Tgfb2/Gnaz/Snph/S…
BP	GO:0048729	tissue morphogenesis	544	-0.380248	-1.28493	0.000339492	0.0050726	0.00383381	4577	tags=39%, list=31%, signal=28%	Npnt/Nkd1/Kif3a/Nup50/Camsap3/Clasp1/Tnni3/Robo1/Lef1/Pax2/Smad1/Adarb1/Hs3st3b1/Fgf7/Fem1b/Efnb2/Msn/Eya1/Cthrc1/Esr1/Lrp5/Plxna1/Snai1/Sdc4/Sfrp1/Dsp/Dlc1/Etv5/Ext1/Tgfbr1/Nckap1/Lcn2/Rala/Wt1/Sufu/Krt28/Fzd3/Cited2/Sema3c/Pax8/Kdm6b/Fgf8/Rnf207/Klf4/Arhgap12/Ube4b/Cobl/Wdr1/Actg2/Ctnnbip1/Pals1/Mdm4/Stil/Stard13/Lama1/Igf1r/Brsk2/Tfap2a/Opa1/Mtss1/Ngfr/Epb41l5/Pax3/Smad3/Dag1/Src/Enpp1/Gbx2/Ad…
BP	GO:1903530	regulation of secretion by cell	464	-0.379773	-1.2776	0.00161071	0.0170958	0.0129208	4317	tags=37%, list=30%, signal=27%	Rph3al/Gnai2/Lrrc8a/Cd84/Ffar2/Itpr1/Lrp5/Atp2a2/Nf1/Sdc4/Sfrp1/F2r/Kcnc3/Stxbp3/Rhot1/C1qtnf12/Rala/Dab2/Neo1/Wdr41/Apbb3/Pax8/Nos1/Pla2g6/Ppard/Myo5b/Golph3/Ptger3/Gpr27/Stxbp1/Gja5/Rab15/Myo5a/Htr7/Cacna1h/Slc30a1/Capn10/Gnao1/Gipr/Pclo/Unc13a/Irs2/Ptger4/Gnas/Nell2/Brsk2/Sybu/Tspoap1/Ncoa6/F2/Cd177/Gab2/Ica1/Gpr68/Stxbp4/Arfip1/Micu3/Bmp6/Git1/Myrip/Smpd3/Lrp1/Rhbdf2/Rab26/Prkd1/Cd200/Ric1/Hn…
BP	GO:0044057	regulation of system process	426	-0.379109	-1.27377	0.00194242	0.0194116	0.0146711	4995	tags=45%, list=34%, signal=31%	Mef2a/Lck/Tmem38b/Kcnn4/Rims1/Kcnma1/Unc13b/Ace/Akap9/Cry1/Ryr1/Alox5/Mdm2/Rbfox2/Tmem38a/Cx3cl1/Hmgcr/Epb41/Jam2/Npnt/Tnni3/Arg2/Hip1r/Tnnt1/Igsf9b/Arhgap42/Cmya5/Slc9a1/Eno1/Rock1/Foxo3/Dmd/Homer1/Atp2a2/Dsp/F2r/Gsk3a/Smad6/Gas6/Dbh/Dab2/Atp2b4/Dbn1/Nos1/Camk2d/Ssh1/Zfp418/Actn3/Cald1/Shisa8/Grik2/Ptger3/Cldn15/Rnf207/Klf4/Gja5/Htr7/Cacna1h/Gnao1/Aqp1/Bin1/Pclo/Mdm4/Pik3r1/Ptger4/Nol3/Gnas/Tnr/…
BP	GO:0098609	cell-cell adhesion	631	-0.377585	-1.28154	0.000266582	0.00431863	0.00326397	4673	tags=42%, list=32%, signal=30%	Mmp24/Cntn6/Lrfn4/Il1rap/Cdh3/Jam2/Alox15/Npnt/Slamf1/Camsap3/Robo1/Sparcl1/Dcc/Arg2/Igsf9b/Fat2/Lef1/Xbp1/Gcnt2/Scarf1/Rock1/Foxo3/Stat5b/Tmem47/Epha3/Efnb2/B2m/Msn/Nfat5/Lrp5/Shb/Rela/Sdc4/Pag1/Cdh4/Dsp/Ext1/Stxbp3/Sema4d/Muc21/Astn1/Rdx/Comp/Gla/Cdk5r1/Neo1/Lims2/Cited2/Cdsn/Nectin3/Dsg1a/Nectin1/Ceacam2/Prtg/Nexn/Ezr/Golph3/Cldn15/Itga6/Klf4/Stxbp1/Jak1/Ptprm/Flot1/Pkp4/Prnp/Il4i1/Itpkb/Sdk1/…
BP	GO:0023061	signal release	414	-0.376182	-1.26239	0.00479635	0.0358029	0.0270594	4191	tags=37%, list=29%, signal=27%	Lrp5/Atp2a2/Nf1/Cyb5r4/Cplx2/Sfrp1/F2r/Kcnc3/Stxbp3/Rhot1/C1qtnf12/Dab2/Pax8/Nos1/Pla2g6/Ppard/Synj1/Ptger3/Gpr27/Raf1/Stxbp1/Gja5/Myo5a/Htr7/Slc30a1/Capn10/Gnao1/Aqp1/Gipr/Snap47/Pclo/Unc13a/Irs2/Ptger4/Gnas/Nell2/Efr3a/Brsk2/Sybu/Erc2/Tspoap1/Ncoa6/F2/Abcc4/Ica1/Gpr68/Stxbp4/Micu3/Bmp6/Git1/Myrip/Smpd3/Lrp1/Unc13c/Syde1/Prkd1/Hnf1a/Clock/Rab11fip2/Slc16a10/Mctp2/Cspg5/Stxbp5/Madd/Slc38a2/Pdx1/P…
BP	GO:0051046	regulation of secretion	496	-0.375396	-1.2661	0.00166594	0.0175608	0.0132723	4317	tags=37%, list=30%, signal=27%	Rph3al/Gnai2/Lrrc8a/Cd84/Ffar2/Itpr1/Lrp5/Atp2a2/Nf1/Sdc4/Sfrp1/F2r/Kcnc3/Stxbp3/Rhot1/C1qtnf12/Rala/Dab2/Neo1/Wdr41/Apbb3/Pax8/Nos1/Pla2g6/Ppard/Myo5b/Golph3/Ptger3/Gpr27/Stxbp1/Gja5/Rab15/Myo5a/Htr7/Cacna1h/Slc30a1/Capn10/Gnao1/Aqp1/Gipr/Pclo/Unc13a/Irs2/Ptger4/Gnas/Nell2/Brsk2/Sybu/Tspoap1/Sytl2/Ncoa6/F2/Cd177/Gab2/Ica1/Gpr68/Stxbp4/Arfip1/Micu3/Bmp6/Git1/Myrip/Smpd3/Lrp1/Rhbdf2/Egf/Rab26/Prkd…
BP	GO:0031175	neuron projection development	958	-0.374973	-1.28026	1.49401e-05	0.00041805	0.000315957	4791	tags=41%, list=33%, signal=29%	Dip2a/Unc5b/Mdm2/Bbs1/Spag6l/Actr3/Itm2c/Plxna2/Cul7/Rbfox2/Cx3cl1/Apbb1/Prkci/Lama2/Prex1/Numb/Lgr4/Prickle2/Cntn6/Mycbp2/Adgrb3/Pls1/Septin2/Kif3a/Hspg2/Camsap3/Cdnf/Robo1/Crkl/Runx1t1/Tnn/Dcc/Rab21/Rtn4ip1/B4galt5/Trio/Plxnb1/Sh3glb1/Scarf1/Adarb1/Usp9x/Gfra3/Gfra1/Rock1/Wasl/Dmd/Spire1/Epha3/Disc1/Efnb2/Itpr1/B2m/Aplp1/Unc5c/Sema5b/Ppp1r12a/Cthrc1/Vldlr/Ephb1/Inpp5f/Plxna1/Prex2/Nf1/Apc/Slc23…
BP	GO:0002009	morphogenesis of an epithelium	466	-0.37322	-1.25572	0.00279337	0.0252882	0.0191125	4280	tags=36%, list=29%, signal=27%	Fem1b/Efnb2/Msn/Eya1/Cthrc1/Esr1/Lrp5/Plxna1/Snai1/Sdc4/Sfrp1/Dlc1/Etv5/Ext1/Nckap1/Lcn2/Rala/Wt1/Sufu/Krt28/Fzd3/Cited2/Sema3c/Pax8/Fgf8/Rnf207/Klf4/Arhgap12/Cobl/Wdr1/Ctnnbip1/Pals1/Stil/Stard13/Lama1/Igf1r/Brsk2/Tfap2a/Opa1/Mtss1/Ngfr/Epb41l5/Pax3/Smad3/Dag1/Src/Enpp1/Gbx2/Adm/Prickle1/Egf/Phactr4/C2cd3/Ripk4/Pard3/Acvrl1/Foxq1/Cyp7b1/Fzd5/Nrarp/Acvr1/Pdx1/Ppp3r1/Nr3c1/Foxc2/Prkaca/Rpgrip1l/Ah…
BP	GO:0034330	cell junction organization	719	-0.373107	-1.27094	9.87055e-05	0.00185253	0.00140012	5013	tags=44%, list=34%, signal=31%	Ctbp2/Clstn1/Fer/Tanc1/Rimbp2/Ccm2/Ophn1/Rims1/Palld/Sema4c/Unc13b/Daam1/Wdpcp/Ace/Zdhhc12/Tjp2/Dip2a/Actr3/Plxna2/Apbb1/Asic1/Prkci/Stau1/Numb/Cacna2d3/Prickle2/Prtn3/Cntn6/Lrfn4/Il1rap/Cdh3/Adgrl4/Mycbp2/Adgrb3/Sigmar1/Large1/Camsap3/Clasp1/Robo1/Crkl/Sparcl1/Hip1r/Igsf9b/Xlr4a/Rhog/Plxnb1/Abhd17c/Sorbs1/Usp9x/Fgf7/Rock1/Pip5k1a/Wasl/Epha3/Disc1/Efnb2/Homer1/Vldlr/Ephb1/Plxna1/Nf1/Snai1/Sdc4/Cd…
BP	GO:0050808	synapse organization	522	-0.372553	-1.25796	0.0023124	0.0215684	0.0163011	5013	tags=44%, list=34%, signal=30%	Ctbp2/Clstn1/Tanc1/Rimbp2/Ophn1/Rims1/Palld/Sema4c/Unc13b/Daam1/Zdhhc12/Dip2a/Actr3/Plxna2/Apbb1/Asic1/Stau1/Numb/Cacna2d3/Prickle2/Cntn6/Lrfn4/Il1rap/Adgrl4/Mycbp2/Adgrb3/Sigmar1/Large1/Robo1/Crkl/Sparcl1/Hip1r/Igsf9b/Xlr4a/Rhog/Plxnb1/Abhd17c/Sorbs1/Usp9x/Fgf7/Rock1/Wasl/Epha3/Disc1/Efnb2/Homer1/Vldlr/Ephb1/Plxna1/Nf1/F2r/Rapgef2/Etv5/Synpo/Sema4d/Gabra3/Colq/Cdk5r1/Sparc/Dnm3/Dbn1/Rac3/Nptxr/N…
BP	GO:0030001	metal ion transport	572	-0.370479	-1.25425	0.00120574	0.0135448	0.010237	4360	tags=38%, list=30%, signal=28%	Flvcr1/Wnk2/Slc10a6/Slc31a2/Gnai2/Cd84/Dmd/Slc30a3/Itpr1/B2m/Wfs1/Slc25a23/Zdhhc13/Homer1/Atp2a2/Slc23a2/Tusc3/F2r/Kcnc3/Abcb8/Tmbim6/Gas6/Prss8/Lcn2/Slc39a10/Letm2/Slc38a1/Ramp1/Atp2b4/Dbi/Slc6a15/Tesc/Slc1a3/Plch1/Nos1/Camk2d/Plch2/Nectin1/Ptger3/Rnf207/Micu2/Akt2/Gja5/Myo5a/Tmem175/Alg10b/Cacna1h/Slc30a1/Gnao1/Aqp1/Prnp/Akap5/Bin1/Kcnk13/Nol3/Gnas/Gja4/Anxa6/Casq2/Slc41a2/Cacnb3/Opa1/Pacsin3/F…
BP	GO:0007417	central nervous system development	809	-0.370188	-1.26	0.00010773	0.00199755	0.00150972	4645	tags=39%, list=32%, signal=28%	Gas8/Cbs/Mycbp2/Ncoa1/Ppt1/Rab23/Kif3a/Hspg2/Large1/Nme5/Robo1/Crkl/Dcc/B4galt5/Lef1/Pax2/Atxn1l/Tacc2/Smad1/Il34/Adarb1/Sox1/Usp9x/Ttpa/Foxo3/Dmd/Fos/Phf8/Disc1/Gli1/B2m/Cln5/Aplp1/Unc5c/B4galt2/Vldlr/Ephb1/Lrp5/Plxna1/Nf1/Sfrp1/Rapgef2/Dlc1/Ext1/Stat3/Stxbp3/Id2/D16Ertd472e/Mxra8/Lamc3/Adgra2/Sufu/Cdk5r1/Atp2b4/Scyl2/Dbi/Lig4/Fzd3/Rac3/Cited2/Ttbk2/Gdpd5/Pax8/Rora/Nde1/Kdm6b/E2f1/Fgf8/Mrtfb/Dra…
BP	GO:0051093	negative regulation of developmental process	764	-0.369843	-1.25904	0.000275696	0.00441975	0.00334039	4196	tags=35%, list=29%, signal=27%	Ephb1/Lrp5/Inpp5f/Nf1/Shb/Apc/Snai1/Rela/Sfrp1/Rapgef2/Pias3/Sap30/Gsk3a/Smad6/Gas6/Stat3/Tgfbr1/Id2/Casz1/Sema4d/Rbpms2/Wt1/Atp2b4/Sparc/Dnm3/Neo1/Nfe2l2/Cited2/Arhgap4/Fzd7/Hdac8/Pax8/Eif4enif1/Rora/Zfp418/Ppard/Prtg/Socs2/E2f1/Fgf8/Draxin/Ptger3/Klf4/Ptprm/Fgf9/Srgn/Axin2/Iqcb1/Id1/Itpkb/Sort1/Bbs2/Stard13/Pik3r1/Ptger4/Map2/Gnas/Wwc2/Tnr/Sema6a/Dixdc1/Noct/F2/Gpr68/Tmsb4x/Tent5c/Ngfr/Sorl1/Ad…
BP	GO:0060322	head development	655	-0.36868	-1.25271	0.000792241	0.00983274	0.00743147	4562	tags=37%, list=31%, signal=27%	Kif3a/Hspg2/Large1/Nme5/Robo1/Crkl/Lef1/Pax2/Atxn1l/Tacc2/Smad1/Sox1/Usp9x/Flvcr1/Foxo3/Dmd/Fos/Tiparp/Phf8/Disc1/Gli1/B2m/Cln5/Aplp1/Unc5c/B4galt2/Ephb1/Plxna1/Nf1/Sfrp1/Plekha1/Rapgef2/Dlc1/Ext1/Stxbp3/Id2/D16Ertd472e/Cdk5r1/Atp2b4/Scyl2/Dbi/Fzd3/Rac3/Ttbk2/Gdpd5/Rora/Nde1/Kdm6b/E2f1/Fgf8/Mrtfb/Draxin/Ptger3/Trnp1/Wdr47/Raf1/Crk/Aqp1/Selenop/Pals1/Macrod2/Stil/Irs2/Bbs2/Mapk8ip3/Kif26a/Tnr/Kif2…
BP	GO:0046649	lymphocyte activation	584	-0.368418	-1.24766	0.00124256	0.0138572	0.0104731	3114	tags=27%, list=21%, signal=22%	Smarca2/Smad3/Eif2ak4/Klhl22/Fcho1/Enpp1/Cdh17/Git1/Lmo1/Fyn/Hspb1/Rhoh/Wwp1/Pde5a/Fzd5/Cd160/Nrarp/Gnrh1/Mill1/Tlr9/Dock11/Efnb1/Ahr/Nfil3/Cd55/6030468B19Rik/Hhex/Polm/Sla2/Slc39a6/Pglyrp2/Notch2/Smad7/Rara/Slc7a1/Aire/Il6st/Kit/Mpzl2/Parp3/Lyst/Kmt5c/Tarm1/Tbc1d10c/Cd74/Sh3rf1/Jak2/Rassf5/H2-DMa/Tcf7/Socs5/Btn2a2/Il2ra/Axl/Cdh26/Slc4a2/Nlrp3/Pms2/Kitl/Socs6/Cgas/Dock2/Kcnk18/Prdx2/Sirpa/Pbx1/Cd…
BP	GO:0000902	cell morphogenesis	904	-0.365581	-1.24594	0.000125834	0.00225185	0.00170192	5063	tags=43%, list=35%, signal=30%	Map2k1/Lama5/Cpne9/Dnm1l/Fat3/Raph1/Fzd4/Tubb1/Mef2a/Sema6d/Ophn1/Rims1/Palld/Sema4c/Rnf157/Bap1/Myo9b/Wdpcp/Spg21/Zmym6/Dip2b/Vps13a/Wdr19/Dip2a/Unc5b/Bbs1/Spag6l/Sh3d19/Actr3/Mkln1/Plxna2/Cul7/Rbfox2/Apbb1/Lama2/Numb/Lgr4/Cntn6/Cdh3/Epb41/Mycbp2/Adgrb3/Fmnl2/Pls1/Kif3a/Hspg2/Cdc42ep2/Robo1/Tnn/Dcc/Rab21/B4galt5/Trio/Zranb1/Lef1/Fam171a1/Rhog/Plxnb1/Sh3glb1/Adarb1/Usp9x/Strip2/Gfra3/Rock1/Wasl/D…
BP	GO:0008285	negative regulation of cell population proliferation	537	-0.365241	-1.23379	0.00234939	0.0217814	0.0164621	4260	tags=36%, list=29%, signal=27%	Ppp1r15a/Efnb2/B2m/Ephb1/Esr1/Nf1/Apc/Sdc4/Sfrp1/F2r/Rapgef2/Dlc1/Smad6/Stat3/Tgfbr1/Slit3/Nupr2/Wt1/Dab2/Sparc/Lims2/Tesc/Cited2/Nos1/Ppard/Ceacam2/E2f1/Gna12/Dusp1/Klf4/Raf1/Mcc/Ptprm/Strn/Prnp/Zbtb49/Axin2/Il4i1/Ctnnbip1/Pik3r1/Wwc2/Tfap2a/Mtss1/Cnot7/Ngfr/Nrk/Nudt6/Agtpbp1/Neurl1a/Smarca2/Smad3/Tsc22d1/Foxa3/Adm/Bmpr2/Bmpr1b/Serpine2/Ptpn14/Cbfa2t3/Trim35/P3h2/Ifitm3/Cd200/Insm1/Acvrl1/Pde5a/…
BP	GO:0022603	regulation of anatomical structure morphogenesis	736	-0.364507	-1.24074	0.000471686	0.00653986	0.00494275	4777	tags=41%, list=33%, signal=29%	Spag6l/Sh3d19/Actr3/Mkln1/Plxna2/Cul7/Sash1/Numb/Lgr4/Pik3cd/Epb41/Adgrb3/Fmnl2/Pkn1/Ccn6/Kif3a/Cdc42ep2/Clasp1/Robo1/Tnn/Rab21/Zranb1/Pax2/Xbp1/Smad1/Fam171a1/Rhog/Plxnb1/Sh3glb1/Ddhd1/Strip2/Fgf7/Rock1/Spire1/Disc1/Ppp1r15a/Efnb2/Oma1/Msn/Esr1/Plxna1/Nf1/Apc/Rela/Slc23a2/Sfrp1/Cdh4/Rapgef2/Dlc1/Etv5/Stat3/Marchf5/Sema4d/Lcn2/Phip/Rdx/Rala/Adgra2/Gla/Wt1/Cdk5r1/Atp2b4/Sparc/Pak4/Dnm3/Dbn1/Epb41l…
BP	GO:0030155	regulation of cell adhesion	618	-0.364094	-1.23504	0.00209041	0.0205118	0.0155026	4595	tags=40%, list=32%, signal=29%	Jam2/Alox15/Npnt/Hspg2/Slamf1/Camsap3/Vav3/Clasp1/Crkl/Tnn/Arg2/Lef1/Xbp1/Plxnb1/Gcnt2/Rock1/Foxo3/Stat5b/Dmd/Epha3/Disc1/Efnb2/B2m/Ppp1r12a/Nfat5/Plxna1/Nf1/Shb/Apc/Rela/Sdc4/Pag1/Dlc1/Rasa1/Sema4d/Muc21/Rdx/Dab2/Dbn1/Lims2/Tesc/Rac3/Cited2/Fzd7/Cdsn/Tesk1/Ceacam2/Dock1/Bag4/Tfe3/Itga6/Dusp1/Klf4/Jak1/Crk/Limch1/Flot1/Prnp/Il4i1/Itpkb/Pik3r1/Ptger4/Plau/Tnr/Lama1/Opa1/Sema6a/Plxna4/Myo10/Akt1/Ep…
BP	GO:0030855	epithelial cell differentiation	552	-0.363228	-1.22823	0.00561432	0.0401881	0.0303737	3764	tags=33%, list=26%, signal=26%	Arhgef26/Kdm6b/Fgf8/Ezr/Basp1/Aldoc/Klf4/Marveld2/Lhfpl5/Elmod3/Alg10b/Myd88/Sipa1l3/Dnase1l2/Id1/Myo1e/Cdhr2/Map1b/E2f4/Lama1/Akap11/Tfap2a/Mtss1/Txnip/Vezf1/Anxa4/Epb41l5/Onecut2/Zfp703/Nup210l/Bmp6/Smad3/Arx/Foxa3/Src/Errfi1/Slc7a11/Lta4h/Bmpr2/Cdh2/Ccno/Insm1/Pard3/Acvrl1/Cnn3/Clock/Nfib/Fzd5/Macroh2a2/Ubiad1/Acvr1/Ros1/Krt7/Eppk1/Ush2a/Hpse/Pdx1/Ppp3r1/Tlr9/Sdc1/Foxc2/Cdx2/B9d1/Cdkn1b/Ehf/Ad…
BP	GO:0007420	brain development	606	-0.361883	-1.22654	0.00249738	0.0227425	0.0171885	4562	tags=37%, list=31%, signal=26%	Kif3a/Hspg2/Large1/Nme5/Robo1/Crkl/Lef1/Pax2/Atxn1l/Tacc2/Smad1/Sox1/Usp9x/Foxo3/Dmd/Fos/Phf8/Disc1/Gli1/B2m/Cln5/Aplp1/Unc5c/B4galt2/Ephb1/Plxna1/Nf1/Sfrp1/Rapgef2/Dlc1/Ext1/Stxbp3/Id2/D16Ertd472e/Cdk5r1/Atp2b4/Scyl2/Dbi/Fzd3/Rac3/Ttbk2/Gdpd5/Rora/Nde1/Kdm6b/E2f1/Fgf8/Mrtfb/Draxin/Ptger3/Trnp1/Wdr47/Crk/Aqp1/Selenop/Pals1/Macrod2/Stil/Irs2/Bbs2/Mapk8ip3/Kif26a/Tnr/Kif21b/Igf1r/Tfap2a/Plxna4/Ssbp…
BP	GO:0045321	leukocyte activation	702	-0.359807	-1.225	0.0018132	0.0187283	0.0141546	3114	tags=27%, list=21%, signal=22%	Smarca2/Smad3/Eif2ak4/Klhl22/Fcho1/Enpp1/Cdh17/Git1/Lmo1/Fyn/Hspb1/Cd200/Rhoh/Wwp1/Pde5a/Fzd5/Cd160/Nrarp/Gnrh1/Mill1/Tlr9/Slc7a2/Dock11/Efnb1/Ahr/Nfil3/Cd55/6030468B19Rik/Hhex/Polm/Sla2/Slc39a6/Pglyrp2/Notch2/Smad7/Rara/Slc7a1/Plpp6/Aire/Il6st/Kit/Mpzl2/Parp3/Lyst/Kmt5c/Hmox1/Lbp/Tarm1/Tbc1d10c/Nmi/Cd74/Sh3rf1/Jak2/Syt11/Rassf5/H2-DMa/Tcf7/Socs5/Btn2a2/Il2ra/Zbtb46/Axl/Cdh26/Slc4a2/Nlrp3/Dppa1/P…
BP	GO:0035239	tube morphogenesis	752	-0.357607	-1.21715	0.00312634	0.0273378	0.0206615	4203	tags=37%, list=29%, signal=28%	Cthrc1/Ephb1/Esr1/Lrp5/Nf1/Shb/Rela/Sdc4/Sfrp1/Rapgef2/Dlc1/Serpinf2/Etv5/Smad6/Ext1/Stat3/Rasa1/Tgfbr1/Id2/Nckap1/Rbpms2/Lcn2/Comp/Rala/Adgra2/Wt1/Sufu/Egfl7/Ramp1/Atp2b4/Sparc/Pak4/Fzd3/Nfe2l2/Srpk2/Cited2/Pax8/Rora/Cald1/Fgf8/Mrtfb/Rnf207/Klf4/Hipk2/Jak1/Amotl1/Gja5/Foxm1/Ptprm/Cobl/Fgf9/Aqp1/Id1/Ctnnbip1/Stil/Stard13/Ptger4/Myo1e/Plau/Jmjd8/Lama1/Ubp1/Fmnl3/Tfap2a/Opa1/Pank2/Sema6a/Asb4/Mtss1…
BP	GO:0060284	regulation of cell development	689	-0.356767	-1.21333	0.00405275	0.0321504	0.0242989	4187	tags=34%, list=29%, signal=25%	Plxna1/Nf1/Shb/Apc/Rela/Sfrp1/Cdh4/Rapgef2/Pias3/Etv5/Gas6/Stat3/Id2/Casz1/Sema4d/Adgra2/Jade2/Lig4/Dbn1/Fzd3/Tesc/Rac3/Arhgap4/Nos1/Eef2k/Myo5b/Actn3/Prtg/Senp1/E2f1/Draxin/Synj1/Tfe3/Slc30a1/Akap5/Bin1/Axin2/Id1/Il4i1/Ctnnbip1/Itpkb/Tiam2/Pik3r1/Map2/Map1b/Gnas/Tnr/Akap11/Opa1/Plxna4/Dixdc1/Ripk1/Ss18l1/F2/Bnc1/Gpr68/Tnik/Sorl1/Dscam/Neurl1a/Smarca2/Dag1/Tsc22d1/Lrp1/Bmpr2/Serpine2/Xlr3b/Hspb1/…
BP	GO:0001775	cell activation	802	-0.356135	-1.21234	0.00185002	0.0188555	0.0142508	3114	tags=27%, list=21%, signal=22%	Smarca2/Smad3/Eif2ak4/Klhl22/Fcho1/Enpp1/Slc7a11/Cdh17/Ccn2/Git1/Lmo1/Fyn/Lrp1/Serpine2/Hspb1/Cd200/Rhoh/Wwp1/Gclc/Acvrl1/Pde5a/Fzd5/Cd160/Nrarp/Gnrh1/Mill1/Pear1/Tlr9/Fam114a1/Slc7a2/Ubash3b/Itgb3/Dock11/Efnb1/Ahr/Nfil3/Cd55/6030468B19Rik/Pdgfb/Hhex/Polm/Gclm/Sla2/Slc39a6/Pglyrp2/Bmper/Notch2/Smad7/Rara/Slc7a1/Plpp6/Aire/Rasa3/Il6st/Kit/Mpzl2/Parp3/Lyst/Kmt5c/Hmox1/Lbp/Tarm1/Tbc1d10c/Nmi/Cd74/Sh…
BP	GO:0048646	anatomical structure formation involved in morphogenesis	973	-0.352866	-1.20455	0.00183161	0.0187923	0.014203	4203	tags=35%, list=29%, signal=27%	Cthrc1/Ephb1/Plxna1/Nf1/Shb/Snai1/Rela/Sdc4/Sfrp1/Dlc1/Ext1/Stat3/Tgfbr1/Neurl2/Nckap1/Myom2/Rala/Adgra2/Wt1/Sufu/Egfl7/Cdk5r1/Ramp1/Atp2b4/Sparc/Pak4/Neo1/Fzd3/Epb41l3/Nfe2l2/Srpk2/Cited2/Fzd7/Sema3c/Pax8/Rora/Nectin1/Cald1/Kdm6b/Fgf8/Dock1/Dusp1/Klf4/Hipk2/Jak1/Amotl1/Gja5/Ptprm/Pfn4/Flot1/Cobl/Fgf9/Aqp1/Rfx2/Axin2/Wdr1/Id1/Nebl/Pals1/Sptbn1/Sdk1/Stil/Stard13/Plau/Jmjd8/Gnas/Ubp1/Casq2/Fmnl3/Tf…
BP	GO:0048871	multicellular organismal-level homeostasis	676	-0.352642	-1.1996	0.00687845	0.0476844	0.0360393	3185	tags=26%, list=22%, signal=21%	Slc25a40/Tsc22d3/Sorl1/Akt1/Bmp6/Adrb3/Bpgm/Smarca2/Foxa3/Sh3gl2/Src/Errfi1/Enpp1/Slc7a11/Ccn2/Lmo1/Prickle1/Arrdc3/Cdh2/G6pdx/Hnf1a/Nfib/Mapk8/Ush2a/Lsr/Tlr9/Foxc2/Slc48a1/Mfsd2a/Pbld2/Prdm16/Ubash3b/Itgb3/Dock11/Ahr/Dyrk3/Tjp3/Ampd3/Arhgef5/Bbs10/Kit/Hif1a/Hmox1/Oas1c/Ikbkb/Nanos1/Bmal1/Cd74/Rb1/Flcn/Jak2/Smad5/Il2ra/Fh1/Csf1/Abat/Axl/Slc4a2/Tgfb2/Kitl/Trpv2/Plac8/Sh2b2/Mbp/Prdx2/Cdk6/Naglu/Bmi…
BP	GO:0030029	actin filament-based process	660	-0.352272	-1.19728	0.0054656	0.0394909	0.0298467	4777	tags=42%, list=33%, signal=29%	Spag6l/Actr3/Mkln1/Phactr3/Cx3cl1/Prkci/Prex1/Rictor/Epb41/Kank3/Fmnl2/Tmod2/Alox15/Pls1/Cdc42ep2/Clasp1/Antxr1/Hip1r/Tnnt1/Rhobtb1/Myo15a/Fam171a1/Rhog/Slc9a1/Myo1g/Sorbs1/Fgf7/Rock1/Pip5k1a/Wasl/Spire1/Epha3/Tnfaip1/Was/Atp2a2/Nf1/Sdc4/Myo7a/Sfrp1/Dsp/Smtnl2/Kcnc3/Dlc1/Serpinf2/Synpo/Rab13/Rasa1/Tgfbr1/Neurl2/Nckap1/Myom2/Rdx/Whamm/Rala/Cdk5r1/Ssh3/Gas2l3/Fmn2/Dbn1/Epb41l3/Rac3/Myo1a/Tesk1/Nos1…
BP	GO:0071495	cellular response to endogenous stimulus	957	-0.351419	-1.19971	0.00126096	0.0139613	0.0105518	4786	tags=39%, list=33%, signal=28%	Cep57/Mdm2/Cpne3/Actr3/Fut8/Rbfox2/Prkci/Max/Acsl1/Ireb2/Fbh1/Adipor2/Pik3cd/Cdh3/Gpr155/Gad2/Il17rd/Ncoa1/Zfp592/Pdcd4/Npnt/Sik2/Tmf1/Sap130/Robo1/Crkl/Lef1/Xbp1/Hdac9/Smad1/Slc9a1/Sorbs1/Ucp2/Gcnt2/Sh3glb1/Usp9x/Gfra1/Fgf7/Rock1/Foxo3/Eid2/Gnai2/Ldlrad4/Stat5b/Dmd/Fos/Epha3/Zfyve9/Yes1/Prmt2/Esr1/Penk/Apc/Rela/Casp9/Pip4k2b/Sfrp1/Hyal2/Rapgef2/Sap30/Gsk3a/Smad6/Gas6/Rab13/Smurf2/Ext1/Stat3/Rasa…
BP	GO:0030334	regulation of cell migration	766	-0.350899	-1.1946	0.00531688	0.0385975	0.0291715	4544	tags=38%, list=31%, signal=28%	Slamf1/Camsap3/Clasp1/Sap130/Robo1/Crkl/Tnn/Lef1/Xbp1/Hdac9/Plxnb1/Il34/Gcnt2/Adarb1/Fgf7/Rock1/Wasl/Foxo3/Gnai2/Ldlrad4/Stat5b/Ppp2r3a/Epha3/Gli1/Phlda2/Msn/Unc5c/Sema5b/Plxna1/Nf1/Apc/Snai1/Sdc4/Sfrp1/Hyal2/F2r/Rapgef2/Dlc1/Sap30/Nod2/Gas6/Smurf2/Stat3/Tgfbr1/Sema4d/Lcn2/Meak7/Rdx/Adgra2/Dab2/Egfl7/Atp2b4/Sparc/Sdc3/Il1r1/Nfe2l2/Rac3/Cited2/Arhgap4/Ttbk2/Sema3c/Camk2d/Ssh1/Ppard/Ythdf3/Elp6/Nex…
BP	GO:0072359	circulatory system development	960	-0.350309	-1.1961	0.00190542	0.0191663	0.0144857	4196	tags=35%, list=29%, signal=27%	Ephb1/Lrp5/Nf1/Shb/Apc/Snai1/Rela/Dsp/Slc2a12/Rapgef2/Dlc1/Serpinf2/Gsk3a/Smad6/Ext1/Stat3/Rasa1/Tgfbr1/Id2/Nckap1/Popdc3/Slit3/Comp/Adgra2/Gla/Wt1/Sufu/Egfl7/Ramp1/Atp2b4/Sparc/Pak4/Nfe2l2/Srpk2/Cited2/Fzd7/Sema3c/Pax8/Camk2d/Rora/Zfp418/Cald1/Kdm6b/Fgf8/Mrtfb/Dusp6/Cert1/Rnf207/Klf4/Hipk2/Jak1/Amotl1/Gja5/Foxm1/Ptprm/Ube4b/Fgf9/Aqp1/Bicc1/Axin2/Esx1/Id1/Nebl/Mdm4/Stil/Stard13/Ptger4/Myo1e/Plau/…
BP	GO:0035295	tube development	945	-0.349832	-1.19414	0.0022754	0.0213527	0.0161381	4203	tags=36%, list=29%, signal=27%	Cthrc1/Ephb1/Esr1/Lrp5/Nf1/Shb/Rela/Sdc4/Sfrp1/Rapgef2/Dlc1/Serpinf2/Etv5/Smad6/Ext1/Stat3/Rasa1/Tgfbr1/Id2/Nckap1/Rbpms2/Lcn2/Acat1/Comp/Rala/Adgra2/Wt1/Sufu/Egfl7/Ramp1/Atp2b4/Sparc/Pak4/Fzd3/Nfe2l2/Srpk2/Rnf220/Cited2/Ttbk2/Sema3c/Pax8/Rora/Cald1/Itpk1/Fgf8/Mrtfb/Rnf207/Klf4/Hipk2/Jak1/Amotl1/Gja5/Foxm1/Ptprm/Cobl/Rcn3/Fgf9/Aqp1/Id1/Ctnnbip1/Stil/Stard13/Ptger4/Mapk8ip3/Myo1e/Plau/Jmjd8/Lama1/…
BP	GO:0040012	regulation of locomotion	842	-0.342668	-1.16681	0.00732462	0.0494228	0.0373531	4785	tags=40%, list=33%, signal=28%	Mdm2/Bbs1/Cpne3/Actr3/Plxna2/Cx3cl1/Sash1/Lama2/Srgap1/Prex1/Numb/Adipor2/Pik3cd/Trp53inp1/Mycbp2/Pkn1/Jam2/Slamf1/Camsap3/Clasp1/Sap130/Robo1/Crkl/Tnn/Lef1/Xbp1/Hdac9/Plxnb1/Il34/Gcnt2/Adarb1/Fgf7/Rock1/Wasl/Foxo3/Gnai2/Ldlrad4/Stat5b/Ppp2r3a/Epha3/Gli1/Efnb2/Phlda2/Msn/Unc5c/Sema5b/Was/Inpp5f/Plxna1/Nf1/Apc/Snai1/Sdc4/Sfrp1/Hyal2/F2r/Rapgef2/Dlc1/Sap30/Nod2/Gas6/Smurf2/Stat3/Tgfbr1/Sema4d/Lcn2/…
BP	GO:2001252	positive regulation of chromosome organization	114	0.279682	1.42779	0.00568361	0.0404957	0.0306062	4001	tags=42%, list=27%, signal=31%	Shcbp1l/Cct4/Cct6a/Cct5/Sfpq/Hnrnpa2b1/Ruvbl2/Smc2/Naf1/Cct7/Smc4/Hnrnpd/Smc5/Pnkp/Kat5/Gnl3/Ino80c/Ino80b/Dhx36/Ncaph2/Myc/Tpr/Cct2/Trim28/Tnks2/Tasor/Terf1/Cct8/Tfpt/Rtel1/Slx1b/Map2k7/Pml/Tcp1/Wrap53/Setdb1/Pkib/Ino80/Nvl/Sirt6/Fen1/Ino80d/Aurkb/Actr5/Atm/Actl6a/Nbn/Cct3
BP	GO:0009152	purine ribonucleotide biosynthetic process	137	0.28984	1.46676	0.000386879	0.00561704	0.00424529	3713	tags=49%, list=25%, signal=37%	Ndufs6/Adss1/Mthfd1/Nme4/Atp5mc2/Impdh2-ps/Ndufa12/Uqcc3/Impdh2/Nudt2/Ndufv1/Ndufa5/Atic/Atp5mg/Atp5po/Atp5me/Ndufs4/Ndufb7/Ndufa9/Parp1/Nme1/Ndufa3/Aprt/Hprt1/Ndufa10/Ndufv3/Ndufb9/Impdh1/Stoml2/Gucy2e/Atp5f1a/Pfas/Gmps/Ndufs3/Atp5pf/Myc/Ndufs1/Guk1/Ndufa8/Ndufc1/Nme2/Ppat/Ndufb1/Ndufs7/Ndufs8/Ndufb6/Atp5f1c/Ndufa6/Ndufb5/Gart/Ndufv2/Ndufs5/Slc25a12/Ndufb10/Paics/Ak2/Ndufc2/Cox11/Sdhb/Sdhd/Atp5i…
BP	GO:0006413	translational initiation	122	0.295868	1.54758	0.00151592	0.0162308	0.0122671	3228	tags=39%, list=22%, signal=30%	Eif3d/Bc1/Eif3l/Eif3e/Eif2ak2/Bzw2/Eif3g/Rpl13a/Eif1a/Eif3a/Npm1/Eif2b5/Abce1/Eif2s2/Abcf1/Eif3f/Eif4h/Eif3b/Eif2b2/Eif4a1/Nck2/Tpr/Ago2/Eif3c/Eif5b/Eif2s3x/Larp1/Eif3m/Rps6kb2/Eif5/Eif2b3/Eif4b/Eif4g1/Eif4a2/Paip2/Dhx33/Ncbp2/Eif2s1/Gigyf2/Scrib/Eif1ad/Eif3h/Pml/Eif3k/Eif3i/Eif4e/Eif2b4
BP	GO:0072329	monocarboxylic acid catabolic process	106	0.311688	1.58809	0.000595431	0.00776583	0.00586933	1579	tags=25%, list=11%, signal=22%	Cyp4f13/Mtln/Acaa1a/Slc27a2/Etfbkmt/Acadvl/Pex2/Hexa/Fah/Acadl/Etfdh/Etfb/Acads/Acadm/Abcd4/Hadhb/Sord/Acad9/Hsd17b10/Hadh/Crat/Hadha/Acot8/Acad11/Idnk/Echdc2
BP	GO:0043414	macromolecule methylation	117	0.342861	1.76409	1.96123e-05	0.000511581	0.000386647	3994	tags=50%, list=27%, signal=37%	Fdxacb1/Etfbkmt/Smyd2/Trmt44/Mrm2/Tyw3/Prmt9/Mettl18/N6amt1/Bud23/Eef1akmt2/Mrm3/Ftsj3/Ehmt2/Btg1/Mettl14/Hsd17b10/Snrpb/Wdr4/Trmo/Thumpd3/Prmt1/Snrpd3/Vcpkmt/Ftsj1/Nsun2/Prmt3/Fbl/Trmt5/Mettl1/Dimt1/Emg1/Zcchc4/Wdr6/Ilf3/Trmt1/Trmt1l/Mettl5/Trmt13/Trmt6/Comt/Mettl15/Larp7/Trmt10a/Mettl22/Tgs1/Thada/Slc25a26/Rnmt/Trdmt1/Mettl21a/Prmt7/Prmt5/Setd2/Alkbh8/Carm1/Setd6/Gspt1/Mrm1
BP	GO:0097250	mitochondrial respirasome assembly	105	0.364775	1.82871	1.76245e-05	0.000475861	0.00035965	3450	tags=44%, list=24%, signal=34%	Ndufs6/Tmem242/Dmac1/Ndufa12/Pet100/Uqcc3/Ndufaf6/Cox19/Uqcrc1/Ndufa5/Ndufaf1/Oxa1l/Ndufs4/Ndufb7/Acad9/Cox7a1/Ndufa9/Ndufa3/Ndufa10/Ndufb9/Atpaf2/Ndufs3/Cox7a2l/Ndufs1/Ndufa8/Sdhaf3/Ndufc1/Ndufaf8/Atpaf1/Nubpl/Ndufb1/Cox16/Tmem223/Ndufs7/Ndufs8/Ndufb6/Ndufa6/Atp23/Ndufb5/Ndufs5/Cox17/Tmem186/Ndufb10/Sco2/Ndufc2/Uqcc2
BP	GO:0009142	nucleoside triphosphate biosynthetic process	111	0.397853	2.05449	1.64735e-07	1.1524e-05	8.70969e-06	3713	tags=51%, list=25%, signal=39%	Ndufs6/Uck1/Nme4/Atp5mc2/Impdh2-ps/Ndufa12/Tyms/Uqcc3/Impdh2/Nudt2/Ndufv1/Ndufa5/Atp5mg/Atp5po/Atp5me/Ndufs4/Ndufb7/Ndufa9/Parp1/Nme1/Cad/Ndufa3/Ndufa10/Ndufv3/Ndufb9/Impdh1/Stoml2/Atp5f1a/Ndufs3/Atp5pf/Myc/Ndufs1/Ndufa8/Ndufc1/Nme2/Ndufb1/Ndufs7/Ndufs8/Ndufb6/Atp5f1c/Ndufa6/Ndufb5/Ndufv2/Ndufs5/Slc25a12/Ndufb10/Ndufc2/Cox11/Sdhb/Sdhd/Atp5if1/Atp5f1e/Atp5pd/Atp5mc3/Atp5f1b/Ndufa7/Ndufs2
BP	GO:0009145	purine nucleoside triphosphate biosynthetic process	101	0.398734	2.026	2.62592e-06	0.000103623	7.83168e-05	3713	tags=53%, list=25%, signal=40%	Ndufs6/Nme4/Atp5mc2/Impdh2-ps/Ndufa12/Uqcc3/Impdh2/Nudt2/Ndufv1/Ndufa5/Atp5mg/Atp5po/Atp5me/Ndufs4/Ndufb7/Ndufa9/Parp1/Nme1/Ndufa3/Ndufa10/Ndufv3/Ndufb9/Impdh1/Stoml2/Atp5f1a/Ndufs3/Atp5pf/Myc/Ndufs1/Ndufa8/Ndufc1/Nme2/Ndufb1/Ndufs7/Ndufs8/Ndufb6/Atp5f1c/Ndufa6/Ndufb5/Ndufv2/Ndufs5/Slc25a12/Ndufb10/Ndufc2/Cox11/Sdhb/Sdhd/Atp5if1/Atp5f1e/Atp5pd/Atp5mc3/Atp5f1b/Ndufa7/Ndufs2
BP	GO:0009206	purine ribonucleoside triphosphate biosynthetic process	100	0.40062	2.03602	1.47546e-06	6.29938e-05	4.76099e-05	3713	tags=54%, list=25%, signal=41%	Ndufs6/Nme4/Atp5mc2/Impdh2-ps/Ndufa12/Uqcc3/Impdh2/Nudt2/Ndufv1/Ndufa5/Atp5mg/Atp5po/Atp5me/Ndufs4/Ndufb7/Ndufa9/Parp1/Nme1/Ndufa3/Ndufa10/Ndufv3/Ndufb9/Impdh1/Stoml2/Atp5f1a/Ndufs3/Atp5pf/Myc/Ndufs1/Ndufa8/Ndufc1/Nme2/Ndufb1/Ndufs7/Ndufs8/Ndufb6/Atp5f1c/Ndufa6/Ndufb5/Ndufv2/Ndufs5/Slc25a12/Ndufb10/Ndufc2/Cox11/Sdhb/Sdhd/Atp5if1/Atp5f1e/Atp5pd/Atp5mc3/Atp5f1b/Ndufa7/Ndufs2
BP	GO:0009201	ribonucleoside triphosphate biosynthetic process	105	0.406117	2.03598	4.64641e-07	2.4658e-05	1.86362e-05	3713	tags=53%, list=25%, signal=40%	Ndufs6/Uck1/Nme4/Atp5mc2/Impdh2-ps/Ndufa12/Uqcc3/Impdh2/Nudt2/Ndufv1/Ndufa5/Atp5mg/Atp5po/Atp5me/Ndufs4/Ndufb7/Ndufa9/Parp1/Nme1/Cad/Ndufa3/Ndufa10/Ndufv3/Ndufb9/Impdh1/Stoml2/Atp5f1a/Ndufs3/Atp5pf/Myc/Ndufs1/Ndufa8/Ndufc1/Nme2/Ndufb1/Ndufs7/Ndufs8/Ndufb6/Atp5f1c/Ndufa6/Ndufb5/Ndufv2/Ndufs5/Slc25a12/Ndufb10/Ndufc2/Cox11/Sdhb/Sdhd/Atp5if1/Atp5f1e/Atp5pd/Atp5mc3/Atp5f1b/Ndufa7/Ndufs2
BP	GO:0022900	electron transport chain	110	0.435503	2.19023	9.00987e-09	9.24413e-07	6.9866e-07	3501	tags=51%, list=24%, signal=39%	Ndufs6/Ndor1/Etfdh/Ndufa12/Etfb/Uqcrb/Uqcc3/Gpd2/Uqcrc2/Uqcrc1/Por/Ndufv1/Ndufa5/Ndufaf1/Pink1/Ndufs4/Cox7a1/Mybbp1a/Norad/Slc25a22/Ndufa10/Ndufv3/Ndufb9/Slc25a18/Cyc1/Gba1/Mtch2/Cox4i1/Ndufs3/Dnajc15/Fdx1/Cox7a2l/Ndufs1/Ccnb1/Ndufa8/Cox7c/Uqcrfs1/Chchd2/Ndufs7/Coq7/Ccnb1-ps/Etfrf1/Ndufs8/Ndufb6/Coq9/Uqcr10/Ndufv2/Slc25a12/Uqcrq/Plec/Sco2/Mdh2/Ndufc2/Park7/Sdhb/Sdhd
BP	GO:0008033	tRNA processing	126	0.458379	2.41691	1.90865e-11	4.19631e-09	3.17152e-09	3454	tags=48%, list=24%, signal=37%	Rpp25l/Trmt44/Elac1/Rpp21/Elp1/Tyw3/Dtwd2/Ddx1/Ctu2/Tsen34/Pus10/Thg1l/Pop4/Adat2/Trmu/Dtwd1/Hsd17b10/Trmt2a/Wdr4/Trmo/Thumpd3/Pus3/Qng1/Dus1l/Cdk5rap1/Trub1/Ftsj1/Nsun2/Tsen2/Osgep/Tprkb/Tsen54/Rpusd4/Adat1/Trmt5/Qtrt2/Mettl1/Nat10/Elp2/Wdr6/Pusl1/Dph3/Trmt1/Pop5/Dus3l/Trmt1l/Elp3/Osgepl1/Elac2/Rtcb/Thumpd1/Pop7/Trit1/Yrdc/Trmt13/Urm1/Trmt6/Qtrt1/Aars1/Trmt10a/Thada
BP	GO:0022904	respiratory electron transport chain	101	0.47009	2.38856	2.60295e-09	3.64176e-07	2.7524e-07	3501	tags=52%, list=24%, signal=40%	Ndufs6/Etfdh/Ndufa12/Etfb/Uqcrb/Uqcc3/Gpd2/Uqcrc2/Uqcrc1/Ndufv1/Ndufa5/Ndufaf1/Pink1/Ndufs4/Cox7a1/Mybbp1a/Norad/Slc25a22/Ndufa10/Ndufv3/Ndufb9/Slc25a18/Cyc1/Gba1/Mtch2/Cox4i1/Ndufs3/Dnajc15/Cox7a2l/Ndufs1/Ccnb1/Ndufa8/Cox7c/Uqcrfs1/Chchd2/Ndufs7/Coq7/Ccnb1-ps/Etfrf1/Ndufs8/Ndufb6/Coq9/Uqcr10/Ndufv2/Slc25a12/Uqcrq/Plec/Sco2/Mdh2/Ndufc2/Park7/Sdhb/Sdhd
BP	GO:0032543	mitochondrial translation	128	0.58028	3.04033	1.64063e-19	5.04985e-17	3.81661e-17	3592	tags=64%, list=25%, signal=49%	Mrpl36/Tufm/Mrps18a/Mrps35/Mrpl54/Wars2/Sars2/Mrpl22/Mrpl19/Mrps33/Aars2/Mrps5/Mrpl11/Mrpl21/Mrps10/Mrpl15/Mrpl55/Mrpl39/Mrps34/Mrpl58/Mrpl23/Mrpl42/Mrps22/Mrpl35/Mrpl47/Mrpl44/Malsu1/Mrpl16/Mrpl17/Lrpprc/Hars1/Mrpl12/Mtrf1l/Mtg1/Mrps27/Mrpl28/Mrps24/Mrps18b/Mrpl3/Chchd1/Gfm1/Mrps16/Cdk5rap1/Mrps15/Mrpl38/Gadd45gip1/C1qbp/Mrps17/Mrps21/Mrps31/Mrps12/Mrpl43/Aurkaip1/Rpusd4/Mrps9/Mrpl46/Mrpl27/Mrpl…
BP	GO:0042274	ribosomal small subunit biogenesis	105	0.670595	3.36187	5.4043e-24	2.77241e-21	2.09535e-21	3802	tags=72%, list=26%, signal=54%	Tsr2/Rps6-ps4/Rps4x/Rps27a/Rps27/Rps7/Rps17/Rps9/Rps15a/Rps8/Rpsa/Rps23/Rps5/Kri1/Dnttip2/Rps12/Rps6/Rps15/Rps24/Rps16/Rps14/Npm1/Ercc2/Rps19/Rps3a1/Aatf/Heatr1/Wdr46/Rps11/Rps25/Ltv1/Tsr3/Wdr43/Tsr1/Gtf2h5/Krr1/Rps13/Utp3/Tbl3/Nol7/Rps21/Fbl/Nol6/Fau/Nop56/Nop58/Dimt1/Emg1/Rrp36/Utp20/Mettl17/Dhx37/Nat10/Bms1/Nop14/Dcaf13/Rcl1/Wdr3/Utp18/Utp23/Slx9/Nop9/Imp4/Utp4/Rrp7a/Srfbp1/Wdr36/Mrps7/Pwp2/Fc…
CC	GO:0034703	cation channel complex	134	-0.509265	-1.63388	4.4295e-06	0.000158535	0.000119819	2987	tags=37%, list=20%, signal=30%	Kcnd3/Akap6/Cacna2d2/Kcna7/Kcnab1/Cnga1/Hspa2/Dpp6/Kcnh1/Scn10a/Gria4/Kcnk1/Cacng4/Vamp2/Scn9a/Kcnk2/Lrrc26/Fkbp1b/Kcnb2/Kcnv2/Kcne3/Cacna1g/Catspere1/Dlg2/Dlg4/Mcub/Unc80/Pde4d/Mcu/C2cd6/Kcnq4/Kcnmb2/Trpc6/Amigo1/Cacna1e/Lrrc55/Cnga4/Trpc4/Trpc5/Stac3/Kcng4/Kcne1/Kcnmb3/Dpp10/Kcnh5/Kcna1/Kcnq5/Cnga2/Kcnh2/Cacna2d1
CC	GO:0098839	postsynaptic density membrane	104	-0.451175	-1.42056	0.00700441	0.0483287	0.0365263	5603	tags=62%, list=38%, signal=39%	Scn8a/Drd3/Epha4/Epha7/Ptprt/Erbb4/Afdn/Nptn/Lrrtm2/Celsr3/Clstn1/Sema4c/Akap9/Asic1/Lrfn4/Adgrb3/Sigmar1/Dcc/Abhd17c/Prr7/Efnb2/Sorcs3/Neo1/Nectin3/Grik2/Csmd2/Slc16a3/Slc30a1/Lrp1/Sema4b/Hspb1/Nrcam/Gpr158/Abhd17b/Kcnh1/Lrrc4/Gria4/Igsf11/Ryk/Cacng4/Kcnk2/Grin3a/Olfm1/Grin2b/Dlg2/Lzts1/Lrp8/Dlg4/Chrm3/Lrrtm3/Iqsec2/Pacsin1/Dagla/Grm1/Itga8/Tmem108/Efnb3/Arc/Slc16a7/Nsg2/Elfn2/Chrm4/Ptpro/Cnksr2…
CC	GO:0043235	receptor complex	240	-0.451054	-1.49456	2.35967e-05	0.000576434	0.000435662	3395	tags=38%, list=23%, signal=30%	Traf3/Chrnd/Igf1r/Plxna4/Ripk1/Eps8/Adrb3/Smad3/Itga4/Lrp1/Bmpr2/Bmpr1b/Cr1l/Acvrl1/Acvr1/Ros1/Stxbp5/Gfra4/Itgb3/Ahr/Chrne/Notch2/Il6st/Kit/Ramp3/Musk/Ikbkb/Bmal2/Bmal1/Cd74/Jak2/Traf5/Plxdc1/Gria4/Axl/Ryk/Cacng4/Grin3a/Crlf1/Ephb4/Tgfbr3/Plxnc1/Olfm1/Scimp/Grin2b/Gabrq/Ptk2b/Lrp8/Osmr/Ror2/Gabbr1/Dlg4/Adgrv1/Calcrl/Il31ra/Ror1/Notch3/Ifnlr1/Insrr/Itga10/Tek/Tril/Epha2/Cd36/Grm1/Impg2/Gabrg3/Itg…
CC	GO:0043204	perikaryon	149	-0.444366	-1.43783	0.00104529	0.0121871	0.0092109	4192	tags=48%, list=29%, signal=34%	Esr1/Penk/Cplx2/Kcnc3/Synpo/Astn1/Cdk5r1/Dmwd/Grik2/Nsmf/Cacna1h/Pde10a/Pals1/Tiam2/Map1b/Nell2/Ngfr/Neurl1a/Cpne5/Fyn/Prph/Myo1d/Hspb1/Kcnab1/Pcsk5/Fzd5/Mapk8/Gnrh1/Mapk10/Kcnh1/Septin14/Pde9a/Syt11/Kcnk1/Ctnnd2/Ddn/C9orf72/Kcnb2/Cdk5/Kcne3/Olfm1/Htr5a/Naip1/Th/Slc4a10/Cpe/Slc12a5/Map2k4/Kif5a/Dlg2/Fchsd1/Pam/Cntnap3/Amigo1/Ttll7/Cacna1e/Cplx1/Itga8/Cnga4/Ntsr1/Btd/Glra4/Ntrk2/Aif1/Hpca/Lypd6/Kc…
CC	GO:0098797	plasma membrane protein complex	351	-0.435647	-1.45911	7.7112e-06	0.000252501	0.000190837	3802	tags=39%, list=26%, signal=30%	Ceacam2/Shisa8/Grik2/Synj1/Btbd8/Gna12/Itga6/Gja5/Abhd12/Gnb4/Cacna1h/Flot1/Gnao1/Gnb1/Traf3/Gnas/Gja4/Chrnd/Igf1r/Cacnb3/Ripk1/Ctnna2/Eps8/Mpdz/Cdh15/Dag1/Cdh17/Itga4/Kcnd3/Cdh18/Cacna2d2/Cdh2/Atp1a3/Kcna7/Ston2/Acvrl1/Cdh6/Kcnab1/Acvr1/Stxbp5/Evc/Gng12/Lilra6/Itgb3/Hspa2/Dpp6/Chrne/Il6st/Kcnh1/Nox1/Ramp3/Gna14/Ikbkb/Cd74/H2-M5/Jak2/Traf5/Scn10a/H2-DMa/Sspn/Gria4/Cdh26/Gjb2/Gng5/Kcnk1/Gnaz/Cacng…
CC	GO:0034702	monoatomic ion channel complex	203	-0.433147	-1.42583	0.000655515	0.0083375	0.00630138	3768	tags=40%, list=26%, signal=30%	Shisa8/Grik2/Micu2/Abhd12/Cacna1h/Clic1/Kcnk13/Chrnd/Cacnb3/Ttyh3/Eps8/Micu3/Kcnd3/Akap6/Cacna2d2/Kcna7/Kcnab1/Lrrc8b/Stxbp5/Cnga1/Kcnj10/Slc17a7/Hspa2/Dpp6/Chrne/Kcnh1/Lrrc8d/Scn10a/Gria4/Kcnk1/Cacng4/Vamp2/Scn9a/Kcnk2/Grin3a/Lrrc26/Fkbp1b/Kcnb2/Kcnv2/Kcne3/Olfm1/Grin2b/Cacna1g/Gabrq/Tmem109/Catspere1/Ptk2b/Dlg2/Cftr/Dlg4/Mcub/Unc80/Pde4d/Mcu/C2cd6/Kcnq4/Kcnmb2/Trpc6/Amigo1/Cacna1e/Gabrg3/Pacc1/…
CC	GO:0042383	sarcolemma	135	-0.433076	-1.39003	0.00304271	0.0270678	0.0204575	4812	tags=45%, list=33%, signal=31%	Ryr1/Alox5/Ppp3cb/Lama2/Ank1/Clcn1/Col6a2/Slc9a1/Sntb1/Dmd/Msn/Esr1/Popdc3/Rdx/Atp2b4/Nos1/Camk2d/Ezr/Cacna1h/Slc30a1/Flot1/Aqp1/Bin1/Gnas/Anxa6/Igf1r/Cacnb3/Dag1/Kcnd3/Akap6/Cdh2/Atp1a3/Slc38a2/Stbd1/Ppp3r1/Synm/Nos1ap/Pde9a/Sspn/Col6a3/Cacng4/Kcnk2/Ank2/Anxa1/Slc27a6/Bgn/Obscn/Sgcb/Adcy5/Cd36/Trim72/Myot/Stac3/Slc2a1/Chrm4/Sri/Fer1l5/Sgcd/Tmem151a/Tgfb3/Cacna2d1
CC	GO:0044306	neuron projection terminus	151	-0.427603	-1.38476	0.00475047	0.0356632	0.0269539	4305	tags=44%, list=30%, signal=31%	Dmd/Rgs10/Esr1/Penk/Apc/Cplx2/Kcnc3/Dbh/Nos1/Grik2/Synj1/Btbd8/Htr7/Aqp1/Prnp/Bin1/Pclo/Unc13a/Ptger4/Erc2/Tspoap1/Dixdc1/Git1/Calb1/Unc13c/Prph/Uchl1/Atp1a3/Atcay/Gnrh1/Cnga1/Ush2a/Bsn/Tprg1l/Synj2/Syt11/Amph/Gria4/Vamp2/Rapgef4/Scn9a/Syt7/Kcnk2/Slc9a6/Th/Slc4a10/Grin2b/Marcks/Dlg4/Chrm3/Flrt3/Ror1/Pacsin1/Cplx1/Cdh8/Ntsr1/Cyp19a1/Ntrk2/Prkca/Chrm4/Kcna1/Sri/Kcnq5/Nmu/Flrt1/Slc18a2
CC	GO:0097060	synaptic membrane	396	-0.41786	-1.4001	2.0525e-05	0.000526466	0.000397897	4730	tags=47%, list=32%, signal=32%	Apbb1/Asic1/Cacna2d3/Ank1/Cntn6/Lrfn4/Gad2/Adgrb3/Sigmar1/Cltb/Crkl/Dcc/Pi4k2a/Hip1r/Igsf9b/Rab3gap2/Plxnb1/Abhd17c/Eno1/Prr7/Atad1/Dmd/Ano2/Efnb2/Itpr1/Sorcs3/F2r/Kcnc3/Sema4d/Gabra3/Rala/Atp2b4/Dnm3/Neo1/Dbn1/Fzd3/Nectin3/Nectin1/Shisa8/Grik2/Synj1/Csmd2/Susd4/Stxbp1/Htr7/Slc16a3/Strn/Cacna1h/Slc30a1/Gnao1/Dennd1a/Akap5/Adgrl2/Unc13a/Chrnd/Erc2/Ctnna2/Ngfr/Ppp1r9b/Dag1/Src/Farp1/Lrp1/Sema4b/Unc…
CC	GO:0045211	postsynaptic membrane	264	-0.412219	-1.36824	0.000773924	0.00974188	0.0073628	4766	tags=48%, list=33%, signal=33%	Mkln1/Apbb1/Asic1/Ank1/Lrfn4/Adgrb3/Sigmar1/Crkl/Dcc/Igsf9b/Plxnb1/Abhd17c/Prr7/Atad1/Dmd/Efnb2/Sorcs3/F2r/Kcnc3/Sema4d/Gabra3/Dnm3/Neo1/Dbn1/Nectin3/Shisa8/Grik2/Csmd2/Susd4/Htr7/Slc16a3/Strn/Cacna1h/Slc30a1/Gnao1/Akap5/Adgrl2/Chrnd/Ctnna2/Ppp1r9b/Dag1/Farp1/Lrp1/Sema4b/Kcnd3/Cdh2/Hspb1/Cspg5/Fxyd6/Itgb3/Nrcam/Gpr158/Gphn/Chrne/Gpr179/Nptx2/Abhd17b/Kcnh1/Musk/Nlgn3/Col13a1/Pcdh8/Lrrc4/Sspn/Gria4…
CC	GO:0009986	cell surface	596	-0.406657	-1.37774	1.15511e-06	5.07918e-05	3.83878e-05	3233	tags=35%, list=22%, signal=28%	F2/Abcc4/Anxa4/Enpep/Crlf2/Ngfr/Sorl1/Tmem123/Dcbld2/Nid2/Dag1/Enpp1/Adamts7/Slc7a11/Cdh17/Itga4/Lrp1/Bmpr2/Mrc2/Cr1l/Iqgap2/Tnfrsf22/Cdh2/Atp1a3/Ifitm3/Cd200/Bst2/Acvrl1/Smim1/Adgre4/Scube1/Fzd5/Chadl/Cspg5/Abcb11/Mill1/Ros1/Adam5/Gfra4/Sdc1/Izumo1r/Itgb3/Efnb1/Vamp4/Cd55/6030468B19Rik/Tjp3/Cd99l2/Aqp11/Pdgfb/Hspa2/Dpp6/Il2rb/Bsn/Notch2/Il6st/Kit/Hilpda/Kcnh1/Ramp3/Aoc3/Musk/Lbp/Entpd6/Cd74/Capn…
CC	GO:0009897	external side of plasma membrane	230	-0.402463	-1.33136	0.00420567	0.0328555	0.0248318	3233	tags=37%, list=22%, signal=29%	F2/Abcc4/Enpep/Crlf2/Ngfr/Tmem123/Dag1/Itga4/Lrp1/Cr1l/Tnfrsf22/Scube1/Chadl/Mill1/Gfra4/Sdc1/Izumo1r/Itgb3/Cd55/6030468B19Rik/Il2rb/Il6st/Kit/Musk/Cd74/Capn2/H2-M5/Btn2a2/Il2ra/Folr2/Tcn2/Lag3/Crlf1/Cd200r3/Plet1/Ece1/Tgfbr3/Cxcl12/Adgra3/Osmr/Mog/Vwf/Lrrc32/Il12b/Tnfsf13/H2-T24/Il31ra/Icosl/Muc16/Cfh/Cd209g/Itga10/Antxr2/Cd36/Klrb1c/Cd274/Psg17/Itgb6/Itga8/Flt3/Ada/Agap2/Siglece/Itga9/Spn/Tlr8/…
CC	GO:0005615	extracellular space	737	-0.386283	-1.31477	2.22005e-05	0.000551073	0.000416495	3162	tags=34%, list=22%, signal=28%	Sorl1/Masp1/Bmp6/Nid2/Dag1/Gpt2/Sost/S100a14/Enpp1/Col1a1/Ccn2/Inhca/Adm/Cpa2/Col24a1/Cr1l/Egf/Serpine2/Smoc2/Tnxb/Mmp15/Rnaset2b/Pate2/Pcsk5/Lrrc17/Scube1/Olfml2a/Chadl/Ctf2/Vegfb/Gnrh1/Fgf17/Mill1/Cat/Lingo2/Hpse/Il18bp/Gfra4/Lsr/Bmp15/Spock1/Lhb/Gdf9/6030468B19Rik/Pdgfb/Bmper/Il6st/Kit/Hilpda/Wnt2b/Dand5/Fam20c/Aoc3/Rab4a/Lbp/Entpd6/Nrg4/Nmi/Col5a2/Cd74/Igfbp6/H2-M5/Rspo2/Col13a1/Dpysl3/Wfdc18…
CC	GO:0097447	dendritic tree	634	-0.38284	-1.29957	5.80958e-05	0.00119213	0.000900995	4334	tags=39%, list=30%, signal=29%	Prr7/Gnai2/Mark4/Rgs10/Epha3/Efnb2/Itpr1/Wfs1/Unc5c/Homer1/Ephb1/Inpp5f/Penk/Nf1/Apc/Cplx2/Kcnc3/Pias3/Synpo/Tubb3/Gabra3/Dbh/Cdk5r1/Dnm3/Dbn1/Fzd3/Slc1a3/Dmwd/Nos1/Nectin3/Eef2k/Nectin1/Myo5b/Cald1/Shisa8/Grik2/Frmpd4/Wdr47/Ncoa2/Abhd12/Myo5a/Septin11/Htr7/Strn/Nsmf/Cacna1h/Slc30a1/Cobl/Gnao1/Prnp/Tmem185a/Dennd1a/Dcp1a/Akap5/Gnb1/Bin1/Snap47/Pclo/Sort1/Txn1/Mapk8ip3/Map2/Map1b/Gnas/Nell2/Kif21b…
CC	GO:0030425	dendrite	633	-0.381461	-1.29471	0.000119033	0.00215519	0.00162887	4334	tags=39%, list=30%, signal=28%	Prr7/Gnai2/Mark4/Rgs10/Epha3/Efnb2/Itpr1/Wfs1/Unc5c/Homer1/Ephb1/Inpp5f/Penk/Nf1/Apc/Cplx2/Kcnc3/Pias3/Synpo/Tubb3/Gabra3/Dbh/Cdk5r1/Dnm3/Dbn1/Fzd3/Slc1a3/Dmwd/Nos1/Nectin3/Eef2k/Nectin1/Myo5b/Cald1/Shisa8/Grik2/Frmpd4/Wdr47/Ncoa2/Abhd12/Myo5a/Septin11/Htr7/Strn/Nsmf/Cacna1h/Slc30a1/Cobl/Gnao1/Prnp/Tmem185a/Dennd1a/Dcp1a/Akap5/Gnb1/Bin1/Snap47/Pclo/Sort1/Txn1/Mapk8ip3/Map2/Map1b/Gnas/Nell2/Kif21b…
CC	GO:0044297	cell body	656	-0.366627	-1.24566	0.000966438	0.0115529	0.00873156	3900	tags=35%, list=27%, signal=27%	Neo1/Dbn1/Fzd3/Rac3/Slc1a3/Dmwd/Myo1a/Gdpd5/Camk2d/Myo5b/Cald1/Grik2/Ezr/Ptger3/Gna12/Rlbp1/Wdr47/Myo5a/Htr7/Gnb4/Strn/Pde1b/Nsmf/Cacna1h/Cobl/Ptbp2/Pde10a/Gnao1/Aqp1/Dennd1a/Akap5/Gnb1/Snap47/Actg2/Pclo/Pals1/Sort1/Tiam2/Txn1/Ptger4/Mapk8ip3/Map2/Map1b/Gnas/Nell2/Igf1r/Erc2/Tacr3/Dixdc1/Amfr/Glrx5/Myo10/Ngfr/Sorl1/Ppp1r9b/Dscam/Neurl1a/Sh3gl2/Src/Cpne5/Enpp1/Ccng1/Fyn/Itga4/Lrp1/Bmpr2/Calb1/Kcnd…
CC	GO:0043025	neuronal cell body	587	-0.363267	-1.23016	0.00294136	0.0263183	0.0198911	4224	tags=37%, list=29%, signal=27%	Unc5c/Homer1/Esr1/Inpp5f/Penk/Apc/Cplx2/Rapgef2/Kcnc3/Synpo/Tubb3/Astn1/Dbh/Slc38a1/Cdk5r1/Neo1/Dbn1/Fzd3/Rac3/Slc1a3/Dmwd/Myo1a/Gdpd5/Camk2d/Myo5b/Cald1/Grik2/Ptger3/Gna12/Wdr47/Myo5a/Htr7/Strn/Pde1b/Nsmf/Cacna1h/Cobl/Ptbp2/Pde10a/Aqp1/Dennd1a/Akap5/Snap47/Pclo/Pals1/Sort1/Tiam2/Txn1/Ptger4/Map2/Map1b/Gnas/Nell2/Igf1r/Erc2/Tacr3/Dixdc1/Amfr/Glrx5/Myo10/Ngfr/Sorl1/Ppp1r9b/Dscam/Neurl1a/Sh3gl2/Src…
CC	GO:0030424	axon	640	-0.359898	-1.22177	0.00390403	0.0314571	0.0237749	4730	tags=40%, list=32%, signal=28%	Apbb1/Itpr2/Prex1/Ank1/Ireb2/Timp2/Cntn6/Arl8a/Gad2/Mycbp2/Eea1/Tmod2/Ppt1/Sigmar1/Kif3a/Robo1/Tnn/Dcc/Rab21/Cables1/Usp9x/Gfra1/Eno1/Dmd/Rgs10/Slc30a3/Disc1/Unc5c/Homer1/Ephb1/Esr1/Inpp5f/Penk/Nf1/Apc/Cplx2/Kcnc3/Gsk3a/Tubb3/Dbh/Slc38a1/Cdk5r1/Spast/Sdc3/Dnm3/Neo1/Dbn1/Fzd3/Il1r1/Epb41l3/Rac3/Arhgap4/Myo1a/Gdpd5/Nos1/Camk2d/Nectin3/Ssh1/Nectin1/Prtg/Nexn/Grik2/Slc38a8/Basp1/Synj1/Dync1i1/Btbd8/A…
CC	GO:0098978	glutamatergic synapse	687	-0.356166	-1.2115	0.00238639	0.021992	0.0166213	5070	tags=43%, list=35%, signal=29%	Atg5/Map2k1/Lama5/Fzd4/Sipa1l2/Ctbp2/Clstn1/Tanc1/Rimbp2/Lck/Abr/Prkar2a/Ophn1/Cpeb1/Rims1/Sema4c/Kcnma1/Unc13b/Daam1/Akap9/Cnnm2/Grm4/Dip2a/Mdm2/Ppp3cb/Actr3/Apbb1/Asic1/Prkci/Stau1/Numb/Prickle2/Lrfn4/Il1rap/Zdhhc5/Eea1/Adgrb3/Fmnl2/Pias1/Sigmar1/Kif3a/Sparcl1/Pi4k2a/Psd3/Hip1r/Trio/Rhog/Plxnb1/Abhd17c/Wasl/Prr7/Atad1/Ano2/Slc30a3/Disc1/Efnb2/Yes1/Homer1/Sorcs3/Vldlr/Ephb1/Plxna1/Nf1/Apc/Rela/C…
CC	GO:0036477	somatodendritic compartment	881	-0.354107	-1.20619	0.00151868	0.0162308	0.0122671	4314	tags=36%, list=30%, signal=27%	Gnai2/Dmd/Mark4/Rgs10/Epha3/Efnb2/Itpr1/Wfs1/Unc5c/Homer1/Ephb1/Esr1/Inpp5f/Penk/Nf1/Apc/Cplx2/Rapgef2/Kcnc3/Pias3/Synpo/Tubb3/Astn1/Gabra3/Dbh/Slc38a1/Cdk5r1/Dnm3/Neo1/Dbn1/Fzd3/Rac3/Slc1a3/Dmwd/Myo1a/Gdpd5/Nos1/Camk2d/Nectin3/Eef2k/Nectin1/Myo5b/Cald1/Shisa8/Grik2/Ptger3/Gna12/Frmpd4/Wdr47/Ncoa2/Abhd12/Myo5a/Septin11/Htr7/Strn/Pde1b/Nsmf/Cacna1h/Slc30a1/Cobl/Ptbp2/Pde10a/Gnao1/Aqp1/Prnp/Tmem185…
CC	GO:1990204	oxidoreductase complex	129	0.298229	1.56129	0.000503012	0.00679066	0.0051323	3501	tags=43%, list=24%, signal=33%	Ndufs6/Dmac1/Ndufa12/Uqcrb/Uqcc3/Uqcrc2/Uqcrc1/Ndufv1/Ndufa5/Hadhb/Amt/Ndufs4/Ndufb7/Cox7a1/Ndufa9/Pdha1/Gldc/Ndufa3/Ndufa10/Hadha/Ndufv3/Ndufb9/Idh3g/Cyc1/Cyba/Cox4i1/Ndufs3/Idh3b/Cox7a2l/Gcsh/Ndufs1/Ndufa8/Cox7c/Ndufc1/Uqcrfs1/Rrm1/Bckdha/Ndufb1/Rrm2/Ndufs7/Ncf1/Ndufs8/Ndufb6/Ndufa6/Pdhb/Uqcr10/Ndufb5/Ndufv2/Ndufs5/Ndufb10/Uqcrq/Dlat/Ndufc2/Sdhb/Sdhd
CC	GO:1905368	peptidase complex	115	0.313815	1.55777	0.000539163	0.00721541	0.00545332	2823	tags=39%, list=19%, signal=32%	Plaur/Psmb3/Pigk/Psma7/Spcs3/Psmc1/Sgf29/Psma6/Psmd6/Pidd1/Psmd13/Psmc4/Sem1/Sf3b3/Ubr1/Usp14/Psmc5/Capn1/Psmc3/Rad23a/Psmb6/Pmpcb/Adrm1/Psmd12/Psmb4/Psmb7/Psmd7/Usp25/Psmd1/Psma3/Psmc2/Zfand2b/Psmb2/Psmc6/Psmb1/Psmd4/Psma5/Psme2/Psmd8/Psmd14/Elp2/Atxn7l3/Psmd2/Sec11a/Psmd9
CC	GO:0098803	respiratory chain complex	100	0.465846	2.36752	3.09832e-09	3.9736e-07	3.0032e-07	3713	tags=55%, list=25%, signal=41%	Ndufs6/Atp5mc2/Dmac1/Ndufa12/Uqcrb/Uqcc3/Uqcrc2/Uqcrc1/Ndufv1/Ndufa5/Atp5mg/Atp5po/Atp5me/Ndufs4/Ndufb7/Cox7a1/Ndufa9/Ndufa3/Ndufa10/Ndufv3/Ndufb9/Atp5f1a/Cyc1/Cox4i1/Ndufs3/Atp5pf/Cox7a2l/Ndufs1/Ndufa8/Cox7c/Ndufc1/Uqcrfs1/Ndufb1/Ndufs7/Ndufs8/Ndufb6/Atp5mj/Atp5f1c/Ndufa6/Uqcr10/Ndufb5/Ndufv2/Ndufs5/Ndufb10/Uqcrq/Ndufc2/Sdhb/Sdhd/Atp5f1e/Atp5pd/Atp5mk/Atp5mc3/Atp5f1b/Ndufa7/Ndufs2
CC	GO:0030684	preribosome	106	0.64672	3.29513	1.1445e-21	4.40345e-19	3.32808e-19	3692	tags=75%, list=25%, signal=57%	Rps6-ps4/Rps4x/Rps27a/Rps27/Rrp1/Ftsj3/Rps7/Rps17/Rps9/Rps15a/Rps8/Rps23/Rps5/Kri1/Rrp15/Dnttip2/Rps12/Rps6/Rps24/Wdr74/Rps16/Rrp1b/Rps14/Rps19/Rps3a1/Aatf/Noc4l/Utp14a/Heatr1/Wdr46/Rps11/Ebna1bp2/Ltv1/Pin4/Wdr43/Wdr12/Mrto4/Ppan/Krr1/Rps13/Utp3/Tbl3/Nol7/Fbl/Nol6/Nop56/Noc2l/Nop58/Dimt1/Emg1/Rrp36/Utp20/Dhx37/Nat10/Bms1/Pes1/Nop14/Dcaf13/Rcl1/Wdr3/Bop1/Utp18/Utp23/Slx9/Nop9/Imp4/Utp4/Rrp7a/Srfbp…
CC	GO:0015934	large ribosomal subunit	118	0.695563	3.55567	3.10975e-29	2.39295e-26	1.80856e-26	2574	tags=70%, list=18%, signal=58%	Mrpl36/Rpl3/Rpl7/Rpl9-ps6/Mrps18a/Rpl12/Rpl6l/Mrpl54/Mrpl22/Mrpl19/Rpl36/Rpl22/Rpl31/Rpl32/Rpl7a/Rpl13/Mrpl11/Mrpl21/Rpl9/Rpl38/Rpl29/Mrpl15/Rpl5/Mrpl55/Mrpl39/Rpl13a/Rpl26/Rpl11/Rpl8/Mrpl58/Mrpl23/Rpl19/Rpl34/Mrpl42/Rpl10l/Rpl6/Rpl27a/Rpl18/Rpl36a/Rpl10a/Rpl23a/Rpl14/Rplp2/Rps12/Rpl21/Rpl37/Mrpl35/Rpl17/Mrpl47/Mrpl44/Rpl4/Mrpl16/Mrpl17/Rpl27/Npm1/Mrpl12/Rpl35a/Rpl32l/Mrpl28/Rpl23/Mrpl3/Rpl39/Rpl…
CC	GO:0022626	cytosolic ribosome	121	0.71272	3.70838	2.66852e-32	4.10685e-29	3.1039e-29	2215	tags=73%, list=15%, signal=62%	Rpl3/Rpl7/Rpl9-ps6/Rpl12/Rps18/Pelo/Rpl6l/Rps3/Rps20/Rps6-ps4/Rpl36/Rpl22/Rpl31/Rpl32/Rpl7a/Rpl13/Rpl9/Rpl38/Rps4x/Rpl29/Rps27a/Rps27/Rpl5/Rpl13a/Rpl26/Rpl11/Rpl8/Rps7/Rps17/Rps9/Rpl19/Rps15a/Rps8/Rpl34/Rpl10l/Rpsa/Rpl6/Rps23/Rpl27a/Rpl18/Rps5/Rpl36a/Rpl10a/Rpl23a/Rpl14/Rplp2/Rps12/Rpl21/Rps6/Rpl37/Rps15/Rpl17/Rps24/Rps2/Rps16/Rpl4/Rps4l/Eef1a1/Rps14/Rpl27/Ascc2/Rpl35a/Rpl32l/Abce1/Rpl23/Rps29/Rp…
MF	GO:0004930	G protein-coupled receptor activity	134	-0.551625	-1.76979	1.42766e-08	1.37323e-06	1.03787e-06	4192	tags=60%, list=29%, signal=43%	Esr1/Galr3/F2r/Vmn2r92/Adgra2/Ramp1/Qrfprl/Fzd3/Fzd7/Ppard/Vmn1r229/Ptger3/Vmn2r94/Gpr27/Htr7/Vmn1r210/Gipr/Adgrl2/Tas1r1/Ptger4/Tacr3/Gpr68/Adrb3/Tbxa2r/Vmn2r114/Adgre4/Fzd5/Vmn1r203/Gpr158/Gpr179/Or5p52/Ramp3/Vmn1r46/Grm2/Gpr35/Htr5b/Htr5a/Ptafr/S1pr3/Ltb4r1/Adgra3/Adgrb2/Agtr1a/Gabbr1/Lpar2/Vmn2r51/Opn3/Chrm3/Adgrg1/Adgrv1/Calcrl/Adgrl3/Npffr2/Tmem116/Cmklr1/Gm5127/Grm8/Grm1/Npsr1/Adgrf5/Vmn2r…
MF	GO:0004888	transmembrane signaling receptor activity	386	-0.471741	-1.57971	5.42184e-10	1.04303e-07	7.88307e-08	4288	tags=52%, list=29%, signal=37%	Epha3/Ffar2/Cd79a/Unc5c/Vldlr/Ephb1/Esr1/Lrp5/Plxna1/Galr3/F2r/Tgfbr1/Lmbr1/Sema4d/Ifnar1/Vmn2r92/Gabra3/Adgra2/Clec2h/Or51v8/Ramp1/Qrfprl/Fzd3/Il1r1/Fzd7/Nptxr/Ppard/Vmn1r229/Grik2/Il12rb2/Il17rb/Ptger3/Vmn2r94/Gpr27/Htr7/Ptprm/Vmn1r210/Fcgr1/Gipr/Adgrl2/Tas1r1/Sort1/Ptger4/Chrnd/Igf1r/Sema6a/Or6c5c/Tacr3/Plxna4/Crlf2/Gpr68/Ngfr/Sorl1/Adrb3/Bmpr2/Bmpr1b/Cr1l/Tbxa2r/Acvrl1/Vmn2r114/Adgre4/Fzd5/Cd…
MF	GO:0038023	signaling receptor activity	520	-0.447914	-1.51202	7.87549e-10	1.21204e-07	9.16043e-08	4199	tags=48%, list=29%, signal=35%	Vldlr/Ephb1/Esr1/Lrp5/Plxna1/Sdc4/Galr3/F2r/Nod2/Stat3/Tgfbr1/Lmbr1/Sema4d/Ifnar1/Ogfrl1/Vmn2r92/Gabra3/Adgra2/Clec2h/Or51v8/Ramp1/Qrfprl/Neo1/Fzd3/Il1r1/Fzd7/Nptxr/Rora/Nectin1/Ppard/Prtg/Vmn1r229/Grik2/Il12rb2/Il17rb/Ptger3/Vmn2r94/Abhd2/Gpr27/Colec12/Htr7/Ptprm/Vmn1r210/Fcgr1/Prnp/Gipr/Adgrl2/Tas1r1/Sort1/Nr6a1/Ptger4/Chrnd/Igf1r/Sema6a/Or6c5c/Tacr3/Plxna4/Amfr/F2/Crlf2/Gpr68/Ngfr/Sorl1/Dcbld2…
MF	GO:0060089	molecular transducer activity	520	-0.447914	-1.51202	7.87549e-10	1.21204e-07	9.16043e-08	4199	tags=48%, list=29%, signal=35%	Vldlr/Ephb1/Esr1/Lrp5/Plxna1/Sdc4/Galr3/F2r/Nod2/Stat3/Tgfbr1/Lmbr1/Sema4d/Ifnar1/Ogfrl1/Vmn2r92/Gabra3/Adgra2/Clec2h/Or51v8/Ramp1/Qrfprl/Neo1/Fzd3/Il1r1/Fzd7/Nptxr/Rora/Nectin1/Ppard/Prtg/Vmn1r229/Grik2/Il12rb2/Il17rb/Ptger3/Vmn2r94/Abhd2/Gpr27/Colec12/Htr7/Ptprm/Vmn1r210/Fcgr1/Prnp/Gipr/Adgrl2/Tas1r1/Sort1/Nr6a1/Ptger4/Chrnd/Igf1r/Sema6a/Or6c5c/Tacr3/Plxna4/Amfr/F2/Crlf2/Gpr68/Ngfr/Sorl1/Dcbld2…
MF	GO:0005126	cytokine receptor binding	151	-0.428602	-1.38799	0.00460085	0.035053	0.0264926	3398	tags=36%, list=23%, signal=28%	Pik3r1/Traf3/Nol3/Tmbim1/Ripk1/Ngfr/Smad3/Ccdc88a/S100a14/Ctf2/Vegfb/Tlr9/Itgb3/Smad7/Il6st/Rasl11b/Zfp369/Jak2/Traf5/Bex3/Csf1/Tgfb2/Kitl/Crlf1/Hsd17b7/Tgfbr3/Grin2b/Cxcl13/Cxcl12/Osmr/Tslp/Il7/Il12b/Tnfsf13/Adam8/Socs1/Il17f/Nsmaf/Tnfsf10/Ntrk1/Angpt1/Casp8/Il31/Ntf5/Ccl6/Prl8a2/Efna5/Ccl28/Il23r/Cd300lf/Amh/Lta/Tlr5/Lifr/Tgfb3
MF	GO:0030545	signaling receptor regulator activity	223	-0.406126	-1.3421	0.00442897	0.0339114	0.0256298	3044	tags=36%, list=21%, signal=29%	Ccn2/Adm/Enho/Sema4b/Egf/Ctf2/Vegfb/Gnrh1/Fgf17/Mill1/Bmp15/Lhb/Gdf9/6030468B19Rik/Pdgfb/Wnt2b/Dand5/Nrg4/Rln3/Wfikkn1/Csf1/Bmp7/Tgfb2/Kitl/Sema3e/Sema3d/Fbn2/Crlf1/Sfrp2/Cdk5/Mdk/Igf2/Wnt11/Fgf10/Cxcl13/Ptk2b/Cxcl12/Hbegf/Tslp/Il7/Il12b/Scg2/Slit2/Fndc5/Tnfsf13/Pde4d/Flrt3/Lypd6b/Metrnl/Wnt7b/Dkkl1/Nrtn/Cd274/Prok1/Il17f/Tnfsf10/Metrn/Adh7/Angpt1/Flrt2/Sema3f/Il31/Ntf5/Cort/Thbs4/Igfbp2/Ccl6/Lyp…
MF	GO:0001227	DNA-binding transcription repressor activity, RNA polymerase II-specific	234	-0.40541	-1.34142	0.00371831	0.0307723	0.0232574	2858	tags=28%, list=20%, signal=23%	Insm1/Foxq1/Zfp750/Hoxd9/5730507C01Rik/Nr3c1/Cdx2/Prdm16/Bhlhe40/Zfp281/Nfil3/Mxd1/Hhex/Nr2f6/Hey1/Snai3/Trps1/Tcf7/Helt/Smad5/Zbtb46/Foxo1/Pou3f1/Pou4f1/Mypop/Snai2/Vsx2/Tbx6/Foxp2/Hes6/Zbtb32/Irx1/Bcl6/Glis3/Bach2/Samd7/Prox1/Ets2/Zfp90/Gsc/Zbtb25/Nr2e1/Klf12/Zfp976/Atf3/Irx3/Hesx1/Glis1/Neurog3/Msx1/Pitx2/Shox2/Nfe2l3/Ppara/Bhlhe41/Sox6/E2f7/Zbtb16/Ascl1/Hey2/Eomes/Creb3l1/Sp5/Tbx2/Irx2/Hes2
MF	GO:0001216	DNA-binding transcription activator activity	391	-0.403903	-1.35236	0.000293923	0.00461579	0.00348856	4510	tags=42%, list=31%, signal=30%	Zfp24/Tcf12/Lef1/Smad1/Zfp229/Elf1/Sox1/Foxo3/Thap11/Stat5b/Fos/Zfp473/Foxk2/Nfat5/Esr1/Rela/Etv5/Stat3/Zfp760/Casz1/Wt1/Gmeb2/Zfp948/Zfp553/Nfe2l2/Rfxap/Pax8/Stat6/E2f1/Hsf5/Foxj3/Klf4/Nfic/Zfp580/Pou2f2/Zfp930/Rfx2/Crx/Nr6a1/E2f4/Dbp/Ubp1/Tfap2a/Vezf1/Rax/Bnc1/Onecut2/Smad3/Arx/Hivep2/Rfx5/Prrx1/Gbx2/Csrnp3/Pbx3/Hnf1a/Clock/Nfib/Lmx1b/Zfp750/Tfap2e/Meis1/Mybl1/Mesp2/Pdx1/Sall2/Elf3/Nr3c1/Foxc2/…
MF	GO:0001217	DNA-binding transcription repressor activity	240	-0.403144	-1.33581	0.00501943	0.0366109	0.0276701	3518	tags=32%, list=24%, signal=25%	Zbtb4/Zbtb49/Foxk1/Esx1/Zbtb20/Tfap2a/Lrrfip1/Smad3/Arx/Prrx1/Insm1/Foxq1/Zfp750/Hoxd9/5730507C01Rik/Nr3c1/Cdx2/Prdm16/Bhlhe40/Zfp281/Nfil3/Mxd1/Hhex/Nr2f6/Hey1/Rara/Snai3/Hif1a/Trps1/Tcf7/Helt/Smad5/Zbtb46/Foxo1/Pou3f1/Pou4f1/Mypop/Snai2/Vsx2/Tbx6/Foxp2/Hes6/Zbtb32/Irx1/Bcl6/Glis3/Bach2/Samd7/Prox1/Ets2/Zfp90/Gsc/Zbtb25/Nr2e1/Klf12/Zfp976/Atf3/Irx3/Hesx1/Glis1/Neurog3/Msx1/Pitx2/Shox2/Nfe2l3/Ppa…
MF	GO:0046873	metal ion transmembrane transporter activity	273	-0.403139	-1.33942	0.00177639	0.0184905	0.0139749	2987	tags=30%, list=20%, signal=25%	Kcnd3/Nipal3/Atp2c1/Cacna2d2/Atp1a3/Kcna7/Slc10a4-ps/Kcnab1/Cnga1/Slc24a3/Slc38a2/Slc13a5/Mfsd2a/Kcnj10/Slc17a7/Slc39a6/Rasa3/Kcnh1/Scn10a/Kcnk12/Trpv2/Kcnk1/Cacng4/Kcnk18/Scn9a/Kcnk2/Grin3a/Lrrc26/Slc9a6/Grina/Kcnb2/Kcnv2/Kcne3/Slc9a3/Slc4a10/Grin2b/Cacna1g/Slc29a1/Slc12a5/Slc6a7/Slc6a20b/Slc12a9/Pkd2l2/Orai2/Slc5a10/Gpm6a/Trpm6/Slc22a3/Mcu/Slc9a4/Kcnq4/Slc41a1/Kcnmb2/Trpc6/Slc11a1/Cacna1e/Atp2b…
MF	GO:0001228	DNA-binding transcription activator activity, RNA polymerase II-specific	383	-0.401273	-1.34408	0.000303037	0.00466374	0.0035248	4510	tags=41%, list=31%, signal=29%	Zfp24/Tcf12/Lef1/Smad1/Zfp229/Elf1/Sox1/Foxo3/Thap11/Stat5b/Fos/Zfp473/Foxk2/Nfat5/Esr1/Rela/Etv5/Stat3/Zfp760/Casz1/Wt1/Gmeb2/Zfp948/Zfp553/Nfe2l2/Rfxap/Pax8/Stat6/Foxj3/Klf4/Nfic/Zfp580/Pou2f2/Zfp930/Rfx2/Crx/Nr6a1/E2f4/Dbp/Ubp1/Tfap2a/Vezf1/Rax/Onecut2/Smad3/Arx/Hivep2/Rfx5/Prrx1/Gbx2/Csrnp3/Pbx3/Hnf1a/Clock/Nfib/Lmx1b/Zfp750/Tfap2e/Meis1/Mybl1/Mesp2/Pdx1/Sall2/Elf3/Nr3c1/Foxc2/Prdm16/Ehf/Hhex…
MF	GO:0005509	calcium ion binding	413	-0.399293	-1.34022	0.000207455	0.00343304	0.00259465	4253	tags=42%, list=29%, signal=31%	Itpr1/Pla2g1b/Slc25a23/Vldlr/Atp2a2/Cdh4/Reps1/Clgn/Gas6/Rhot1/Slit3/Comp/Efcab8/Egfl7/Cdk5r1/Mgmt/Sparc/Tesc/Plch1/Dsg1a/Scube3/Eef2k/Plch2/Edem1/Lcp1/Actn3/Usp32/Calr4/Edem2/Micu2/Creld1/Myo5a/Rcn3/Prrg4/Pclo/Unc13a/Hpcal1/Cdhr2/Nol3/Nell2/Anxa6/Casq2/Prrg2/Bcl2l10/Ttyh3/F2/Anxa4/Micu3/Masp1/Cdh15/Nid2/Dag1/S100a14/Spata21/Enpp1/Cdh17/Ltbp2/Efcab11/Lrp1/Calb1/Unc13c/Nkd2/Egf/Atp2c1/Cdh2/Pdp1/Sm…
MF	GO:0015267	channel activity	278	-0.394555	-1.31175	0.00413123	0.0324386	0.0245167	3618	tags=35%, list=25%, signal=27%	Gja5/Tmem175/Cacna1h/Aqp1/Clic1/Kcnk13/Gja4/Anxa6/Chrnd/Tmbim1/Cacnb3/Tspoap1/Bcl2l10/Ttyh3/Kcnd3/Cacna2d2/Kcna7/Kcnab1/Lrrc8b/Cnga1/Slc24a3/Kcnj10/Slc17a7/Aqp11/Chrne/Rasa3/Kcnh1/Lrrc8d/Scn10a/Kcnk12/Gria4/Gjb2/Tmc7/Tmc8/Trpv2/Kcnk1/Cacng4/Kcnk18/Scn9a/Kcnk2/Grin3a/Lrrc26/Grina/Kcnb2/Kcnv2/Kcne3/Grin2b/Cacna1g/Gabrq/Tmem109/Slc12a5/Cftr/Gjc1/Pkd2l2/Orai2/Gsdme/Gpm6a/Trpm6/Unc80/Mcu/Gsdmc2/Kcnq4/…
MF	GO:0022803	passive transmembrane transporter activity	278	-0.394555	-1.31175	0.00413123	0.0324386	0.0245167	3618	tags=35%, list=25%, signal=27%	Gja5/Tmem175/Cacna1h/Aqp1/Clic1/Kcnk13/Gja4/Anxa6/Chrnd/Tmbim1/Cacnb3/Tspoap1/Bcl2l10/Ttyh3/Kcnd3/Cacna2d2/Kcna7/Kcnab1/Lrrc8b/Cnga1/Slc24a3/Kcnj10/Slc17a7/Aqp11/Chrne/Rasa3/Kcnh1/Lrrc8d/Scn10a/Kcnk12/Gria4/Gjb2/Tmc7/Tmc8/Trpv2/Kcnk1/Cacng4/Kcnk18/Scn9a/Kcnk2/Grin3a/Lrrc26/Grina/Kcnb2/Kcnv2/Kcne3/Grin2b/Cacna1g/Gabrq/Tmem109/Slc12a5/Cftr/Gjc1/Pkd2l2/Orai2/Gsdme/Gpm6a/Trpm6/Unc80/Mcu/Gsdmc2/Kcnq4/…
MF	GO:0003700	DNA-binding transcription factor activity	960	-0.390901	-1.3347	1.54917e-07	1.13532e-05	8.58059e-06	4007	tags=35%, list=27%, signal=27%	Zhx3/Zhx1/Zfp260/Zfp599/Wt1/Gmeb2/Zfp948/Zfp575/Zfp979/Zfp74/Zfp553/Nfe2l2/Rfxap/Nfxl1/Pax8/Rora/Zfp418/Ppard/Stat6/E2f1/Zfp444/Mrtfb/Hsf5/Zbtb41/Tfe3/Foxj3/Klf4/Abhd2/Zfp362/Zfp784/Nfic/Foxm1/Zfp580/Pou2f2/Zfp930/Zbtb47/Zbtb4/Rfx2/Hivep3/Zbtb49/Crx/Foxk1/Esx1/Zfp664/Nr6a1/Zfp426/E2f4/Dbp/Ubp1/Zbtb20/Zfp696/Tfap2a/Lrrfip1/Zfp383/Zfp846/Nkx2-3/Aff3/Ss18l1/Vezf1/Rax/Bnc1/Zfp334/Zfp92/Onecut2/Zkscan…
MF	GO:0000981	DNA-binding transcription factor activity, RNA polymerase II-specific	916	-0.390835	-1.33314	1.88639e-07	1.26224e-05	9.53989e-06	4465	tags=39%, list=31%, signal=29%	Lef1/Pax2/Xbp1/Smad1/Zfp229/Nacc1/Zfp964/Prdm1/Elf1/Sox1/Zfp931/Eno1/Foxo3/Thap11/Stat5b/Fos/Gm5141/Zfp980/Gli1/Zfp473/Foxk2/Npas2/Nfat5/Esr1/Snai1/Rela/Zbtb33/Zfp623/Etv5/Zscan29/Stat3/Zfp760/Zkscan14/Casz1/Zhx3/Zhx1/Zfp260/Zfp599/Wt1/Gmeb2/Zfp948/Zfp575/Zfp979/Zfp74/Zfp553/Nfe2l2/Rfxap/Nfxl1/Pax8/Rora/Zfp418/Ppard/Stat6/E2f1/Zfp444/Zbtb41/Tfe3/Foxj3/Klf4/Abhd2/Zfp784/Nfic/Zfp580/Pou2f2/Zfp930/Z…
MF	GO:0000978	RNA polymerase II cis-regulatory region sequence-specific DNA binding	826	-0.377513	-1.2856	1.6057e-05	0.000441282	0.000333516	3987	tags=33%, list=27%, signal=26%	Zfp260/Zfp599/Wt1/Gmeb2/Zfp948/Zfp575/Zfp979/Zfp74/Zfp553/Nfe2l2/Pax8/Rora/Zfp418/Ppard/Stat6/Kdm6b/E2f1/Zfp444/Hsf5/Tfe3/Foxj3/Klf4/Zfp362/Ncoa2/Nfic/Zfp580/Pou2f2/Zfp930/Calcoco1/Zbtb4/Rfx2/Hivep3/Zbtb49/Crx/Foxk1/Zfp664/Nr6a1/Zfp426/E2f4/Dbp/Ubp1/Zbtb20/Tfap2a/Lrrfip1/Zfp846/Nkx2-3/Rax/Zfp334/Zfp92/Onecut2/Zkscan16/Smad9/Pax3/Smad3/Zfhx4/Arx/Hivep2/Obox2/Rfx5/Foxa3/Prrx1/Tet3/Zscan20/Sall3/Pou…
MF	GO:0000977	RNA polymerase II transcription regulatory region sequence-specific DNA binding	974	-0.375533	-1.28191	6.80913e-06	0.000232872	0.000176002	3940	tags=33%, list=27%, signal=26%	Gmeb2/Zfp948/Zfp575/Zfp979/Zfp74/Zfp553/Nfe2l2/Rfxap/Nfxl1/Pax8/Rora/Zfp418/Ppard/Stat6/Kdm6b/E2f1/Zfp444/Hsf5/Zbtb41/Tfe3/Foxj3/Klf4/Rbl2/Zfp362/Ncoa2/Zfp784/Nfic/Foxm1/Zfp580/Pou2f2/Zfp930/Calcoco1/Zbtb4/Rfx2/Hivep3/Zbtb49/Crx/Foxk1/Esx1/Zfp664/Nr6a1/Zfp426/E2f4/Dbp/Ubp1/Zbtb20/Zfp696/Tfap2a/Lrrfip1/Zfp383/Zfp846/Gtf2a1/Nkx2-3/Vezf1/Rax/Zfp334/Zfp92/Onecut2/Zkscan16/Smad9/Pax3/Smad3/Zfhx4/Arx/H…
MF	GO:0000987	cis-regulatory region sequence-specific DNA binding	853	-0.373686	-1.27235	7.38884e-05	0.00145788	0.00110185	3987	tags=33%, list=27%, signal=25%	Zfp260/Zfp599/Wt1/Gmeb2/Zfp948/Zfp575/Zfp979/Zfp74/Zfp553/Nfe2l2/Pax8/Rora/Zfp418/Ppard/Stat6/Kdm6b/E2f1/Zfp444/Hsf5/Tfe3/Foxj3/Klf4/Zfp362/Ncoa2/Nfic/Zfp580/Pou2f2/Zfp930/Calcoco1/Zbtb4/Rfx2/Hivep3/Zbtb49/Crx/Foxk1/Zfp664/Nr6a1/Zfp426/E2f4/Dbp/Ubp1/Zbtb20/Tfap2a/Lrrfip1/Zfp846/Nkx2-3/Rax/Zfp334/Zfp92/Onecut2/Zkscan16/Smad9/Pax3/Smad3/Zfhx4/Arx/Hivep2/Obox2/Rfx5/Foxa3/Prrx1/Tet3/Zscan20/Sall3/Pou…
MF	GO:0045182	translation regulator activity	132	0.2958	1.53977	0.000377704	0.00553607	0.00418409	2575	tags=36%, list=18%, signal=30%	Tufm/Nhlrc3/Eif3d/Bc1/Tyms/Eif3l/Rack1/Eif3e/Eef1g/Eif3g/Mrpl58/Rps9/Eef1d/Serbp1/Eef2/Eif1a/Eif3a/Ifrd2/Eef1a1/Rps14/Eif2b5/Mtrf1l/Eif2s2/Abcf1/Eif3f/Eif4h/Eif3b/Pura/Eif2b2/Eif4a1/Gfm1/Eef1b2/Rpl10/Eif3c/Cnbp/Eif5b/Eif2s3x/Larp1/Eif3m/Cyfip1/Eif5/Eif2b3/Eif4b/Eif4g1/Eif4a2/Paip2/Abtb1/Eif5a
MF	GO:0090079	translation regulator activity, nucleic acid binding	101	0.362971	1.84428	5.47205e-05	0.00113804	0.000860116	3228	tags=46%, list=22%, signal=36%	Tufm/Eif3d/Tyms/Eif3l/Eif3e/Eef1g/Eif3g/Mrpl58/Eef1d/Eef2/Eif1a/Eif3a/Eef1a1/Eif2b5/Mtrf1l/Eif2s2/Abcf1/Eif3f/Eif4h/Eif3b/Pura/Eif2b2/Eif4a1/Gfm1/Eef1b2/Eif3c/Eif5b/Eif2s3x/Larp1/Eif3m/Eif5/Eif2b3/Eif4b/Eif4g1/Eif4a2/Paip2/Abtb1/Eif5a/Eif2s1/Eif1ad/Eif3h/Eif3k/Eif3i/Pcbp1/Eif4e/Eif2b4
MF	GO:0043022	ribosome binding	109	0.396803	1.98201	4.4848e-07	2.4658e-05	1.86362e-05	4525	tags=58%, list=31%, signal=40%	Ncln/Pelo/Maip1/Rack1/Oxa1l/Letmd1/Rpsa/Serbp1/Eef2/Ttc5/Eif1a/Nme1/Malsu1/Ifrd2/Gtpbp6/Npm1/Gemin5/Abce1/Mrps27/Abcf1/Eri1/Ighmbp2/Dnajc2/C1qbp/Eif3c/Rps21/Prmt3/Larp1/Ung/Ola1/Mettl17/Eif5a/Tmem223/Nemf/Dhx33/Eif2s1/Guf1/Zc3h12a/Rbm3/Bag6/Eif3k/Mrrf/Nmd3/Srp68/Mtres1/Eif2a/Ltn1/Impact/Nomo1/Sbds/Dhx9/Naa16/Rpn2/Eif6/G3bp1/Pym1/Ptcd3/Unk/Mcts1/Dhx29/Usp16/Naa15/Dap
MF	GO:0140101	catalytic activity, acting on a tRNA	130	0.499366	2.63833	5.27792e-14	1.35379e-11	1.02318e-11	3466	tags=52%, list=24%, signal=40%	Dtd1/Lars1/Trmt44/Elac1/Rpp21/Tyw3/Dtwd2/Wars2/Sars2/Tsen34/Aars2/Yars1/Pus10/Thg1l/Pop4/Trmu/Mrpl58/Dtwd1/Hars2/Trmt2a/Hars1/Trmo/Thumpd3/Pus3/Dus1l/Pars2/Eprs1/Ggt1/Tars2/Pstk/Trub1/Mars1/Ftsj1/Nsun2/Farsa/Rars1/Ankzf1/Tsen2/Ptrhd1/Rpusd4/Tars1/Trmt5/Qtrt2/Mettl1/Nars2/Pusl1/Nars1/Dars2/Trmt1/Pop5/Gars1/Dus3l/Ptrh1/Wars1/Prorsd1/Trmt1l/Elac2/Yars2/Pop7/Trit1/Trmt13/Qtrt1/Qrsl1/Aars1/Trmt10a/Car…
