# Supplementary material for: SETDB1 enables development beyond cleavage stages by extinguishing the MERVL-driven two-cell totipotency transcriptional program in the mouse embryo
Source: eLife. 2026 Feb 16;15:RP109248. doi: 10.7554/eLife.109248 (PMC12908936; doi:10.7554/eLife.109248)
Supplement: Figure 1—figure supplement 3—source data 1. — GO enrichment for DEG subsets defined by intersecting Venn diagram compartments (Figure 1E, F). The analysis was run using the function enrichGO from the R package ClusterProfiler (v4.14.4). Results are shown only for sets with significant enrichment. [file elife-109248-fig1-figsupp3-data1.xlsx]

## Sheet: 2cWT_2cKO__8cKO_2cKO_up_enrGO
Figure 1–figure supplement 3–Source Data 1. Overrepresentation Analysis (ORA) against Gene Ontology (GO) Analysis by DEG Venn Compartment. GO enrichment for DEG subsets defined by intersecting Venn diagram compartments (Fig. 1E–F). The analysis was run using function enrichGO from R package ClusterProfiler (v4.14.4). Results are shown only for sets with significant enrichment.
ONTOLOGY	ID	Description	GeneRatio	BgRatio	RichFactor	FoldEnrichment	zScore	pvalue	p.adjust	qvalue	geneID	Count
BP	GO:0022613	ribonucleoprotein complex biogenesis	20/102	432/13469	0.0462963	6.11338	9.43617	6.31807e-11	9.33811e-08	9.22439e-08	Rrp15/Crnkl1/Ipo4/Puf60/Prpf31/Ddx27/Srsf1/Pes1/Bop1/Rbfa/Tma16/Sdad1/Sfswap/Kri1/Wdr18/Dnttip2/Rrp1b/Rpl10l/Nol7/Utp14a	20
BP	GO:0042254	ribosome biogenesis	15/102	308/13469	0.0487013	6.43096	8.42252	1.01156e-08	7.47541e-06	7.38437e-06	Rrp15/Ipo4/Ddx27/Pes1/Bop1/Rbfa/Tma16/Sdad1/Kri1/Wdr18/Dnttip2/Rrp1b/Rpl10l/Nol7/Utp14a	15
BP	GO:0016072	rRNA metabolic process	11/102	242/13469	0.0454545	6.00223	6.85923	2.12023e-06	0.00104457	0.00103185	Rrp15/Ddx27/Pes1/Bop1/Rbfa/Kri1/Wdr18/Trir/Rrp1b/Nol7/Utp14a	11
BP	GO:0006364	rRNA processing	10/102	210/13469	0.047619	6.28805	6.74659	4.18891e-06	0.0015478	0.00152895	Rrp15/Ddx27/Pes1/Bop1/Rbfa/Kri1/Wdr18/Rrp1b/Nol7/Utp14a	10
BP	GO:0042273	ribosomal large subunit biogenesis	6/102	61/13469	0.0983607	12.9884	8.19747	6.44675e-06	0.00190566	0.00188245	Rrp15/Pes1/Bop1/Tma16/Sdad1/Rpl10l	6
BP	GO:0000460	maturation of 5.8S rRNA	4/102	35/13469	0.114286	15.0913	7.29151	0.000135522	0.0333836	0.032977	Rrp15/Pes1/Bop1/Kri1	4
CC	GO:0030684	preribosome	8/105	105/13576	0.0761905	9.85107	8.03813	1.46739e-06	0.000306684	0.000285754	Rrp15/Pes1/Bop1/Kri1/Dnttip2/Rrp1b/Nol7/Utp14a	8
CC	GO:0005743	mitochondrial inner membrane	13/105	438/13576	0.0296804	3.83753	5.32939	3.22364e-05	0.0033687	0.00313881	Tmem242/Slc25a41/Acadvl/Sfxn1/Mrpl39/Mrpl28/Uqcrc1/Mccc1/Mrpl12/Mrps35/Ndufaf6/Uqcc3/Tufm	13
CC	GO:0019866	organelle inner membrane	13/105	482/13576	0.026971	3.48722	4.90869	8.58411e-05	0.00598026	0.00557214	Tmem242/Slc25a41/Acadvl/Sfxn1/Mrpl39/Mrpl28/Uqcrc1/Mccc1/Mrpl12/Mrps35/Ndufaf6/Uqcc3/Tufm	13
CC	GO:0030687	preribosome, large subunit precursor	3/105	18/13576	0.166667	21.5492	7.7019	0.000337127	0.0176149	0.0164128	Rrp15/Pes1/Bop1	3
CC	GO:0030686	90S preribosome	3/105	24/13576	0.125	16.1619	6.5633	0.00080848	0.0337945	0.0314882	Pes1/Bop1/Kri1	3

## Sheet: 8cWT_2cWT__8cKO_2cKO_up_enrGO
Figure 1–figure supplement 3–Source Data 1. Overrepresentation Analysis (ORA) against Gene Ontology (GO) Analysis by DEG Venn Compartment. GO enrichment for DEG subsets defined by intersecting Venn diagram compartments (Fig. 1E–F). The analysis was run using function enrichGO from R package ClusterProfiler (v4.14.4). Results are shown only for sets with significant enrichment.
ONTOLOGY	ID	Description	GeneRatio	BgRatio	RichFactor	FoldEnrichment	zScore	pvalue	p.adjust	qvalue	geneID	Count
BP	GO:0002181	cytoplasmic translation	75/706	161/13469	0.465839	8.88722	23.6787	3.95961e-53	1.71411e-49	1.63386e-49	Hnrnpd/Rpl13/Eif2b5/Rps11/Rpl8/Rplp1/Rps18/Rps15a/Rps25/Rpl15/Rps5/Rpl19/Drg1/Rps27a/Drg2/Eif5/Eif3e/Eif4a2/Rps14/Eif3a/Rps24/Rps26/Rplp2/Rpl14/Rps3a1/Rps6/Ybx1/Eif3i/Rpl6/Cnbp/Eif3c/Rps4x/Rpl4/Syncrip/Rpsa/Rps29/Eef2/Rps16/Rpl10a/Rpl12/Alkbh3/Rps19/Rpl21/Rpl37/Rpl7/Rps2/Rpl18a/Rpl37a/Rpl27a/Rpl9/Rpl29/Rps23/Eif3k/Eif3b/Rpl38/Rpl32/Rpl23a/Rpl5/Rpl30/Rpl18/Eif4a1/Rps12/Rpl34/Rpl17/Rpl9-ps6/Rpl7a/R…	75
BP	GO:0140241	translation at synapse	38/706	48/13469	0.791667	15.1033	23.0212	3.32708e-40	4.80098e-37	4.5762e-37	Rpl13/Rps11/Rpl8/Rpl10/Rps15a/Rpl15/Rps5/Rps27a/Rps14/Rps24/Rps26/Rplp2/Rpl14/Rpl6/Rpl4/Eef2/Rps16/Rpl10a/Rpl12/Rpl37/Rpl7/Rpl37a/Rpl27a/Rpl9/Rpl29/Rpl38/Rpl32/Rpl23a/Rpl5/Rps12/Rpl34/Rpl17/Rpl7a/Rpl27/Rpl23/Rpl13a/Rpl36a/Rps27	38
BP	GO:0140242	translation at postsynapse	38/706	48/13469	0.791667	15.1033	23.0212	3.32708e-40	4.80098e-37	4.5762e-37	Rpl13/Rps11/Rpl8/Rpl10/Rps15a/Rpl15/Rps5/Rps27a/Rps14/Rps24/Rps26/Rplp2/Rpl14/Rpl6/Rpl4/Eef2/Rps16/Rpl10a/Rpl12/Rpl37/Rpl7/Rpl37a/Rpl27a/Rpl9/Rpl29/Rpl38/Rpl32/Rpl23a/Rpl5/Rps12/Rpl34/Rpl17/Rpl7a/Rpl27/Rpl23/Rpl13a/Rpl36a/Rps27	38
BP	GO:0140236	translation at presynapse	37/706	47/13469	0.787234	15.0188	22.6427	5.28641e-39	5.72122e-36	5.45335e-36	Rpl13/Rps11/Rpl8/Rpl10/Rps15a/Rpl15/Rps5/Rps27a/Rps14/Rps24/Rps26/Rplp2/Rpl14/Rpl6/Rpl4/Rps16/Rpl10a/Rpl12/Rpl37/Rpl7/Rpl37a/Rpl27a/Rpl9/Rpl29/Rpl38/Rpl32/Rpl23a/Rpl5/Rps12/Rpl34/Rpl17/Rpl7a/Rpl27/Rpl23/Rpl13a/Rpl36a/Rps27	37
BP	GO:0022613	ribonucleoprotein complex biogenesis	70/706	432/13469	0.162037	3.09133	10.3909	1.31113e-17	1.13517e-14	1.08202e-14	Nhp2/Prpf6/Rps11/Snrnp200/Ruvbl2/Bud23/Rps15a/Rps25/Rps5/Srsf6/C1qbp/Aatf/Pelp1/Ddx39b/Xab2/Ltv1/Rps27a/Prpf8/Eif5/Eif3e/Hsp90ab1/Wdr46/Rps14/Eif3a/Rps24/Exosc7/Rpl14/Sf3b1/Ncl/Snrpb/Gar1/Rps3a1/Nol6/Rps6/Eif3i/Sf3a3/Ran/Dhx37/Eif3c/Rps4x/Rpsa/Wdr3/Rps16/Fau/Sart1/Rps19/Utp4/Ago1/Nop53/Rpl7/Fbl/Rps23/Heatr1/Eif3k/Utp18/Eif3b/Npm1/Rpl38/Rpl5/Rps12/Rpl7a/Rpl27/Rps15/Rpl7l1/Rnasel/Rplp0/Rpl13a/Eif2s…	70
BP	GO:0042274	ribosomal small subunit biogenesis	30/706	106/13469	0.283019	5.39941	10.6948	1.09372e-14	7.89118e-12	7.52171e-12	Rps11/Rps15a/Rps25/Rps5/Aatf/Ltv1/Rps27a/Wdr46/Rps14/Rps24/Rps3a1/Nol6/Rps6/Dhx37/Rps4x/Rpsa/Wdr3/Rps16/Fau/Rps19/Utp4/Fbl/Rps23/Heatr1/Utp18/Npm1/Rps12/Rps15/Rps27/Rps13	30
BP	GO:0042254	ribosome biogenesis	50/706	308/13469	0.162338	3.09706	8.75628	6.58107e-13	4.06992e-10	3.87937e-10	Nhp2/Rps11/Bud23/Rps15a/Rps25/Rps5/C1qbp/Aatf/Pelp1/Ltv1/Rps27a/Eif5/Wdr46/Rps14/Rps24/Exosc7/Rpl14/Ncl/Gar1/Rps3a1/Nol6/Rps6/Ran/Dhx37/Rps4x/Rpsa/Wdr3/Rps16/Fau/Sart1/Rps19/Utp4/Nop53/Rpl7/Fbl/Rps23/Heatr1/Utp18/Npm1/Rpl38/Rpl5/Rps12/Rpl7a/Rpl27/Rps15/Rpl7l1/Rnasel/Rplp0/Rps27/Rps13	50
BP	GO:0022618	protein-RNA complex assembly	33/706	176/13469	0.1875	3.57711	8.09384	1.26373e-10	6.83835e-08	6.51818e-08	Prpf6/Snrnp200/Ruvbl2/Rps25/Rps5/Srsf6/Ddx39b/Xab2/Prpf8/Eif5/Eif3e/Hsp90ab1/Rps14/Eif3a/Sf3b1/Snrpb/Rps6/Eif3i/Sf3a3/Eif3c/Rpsa/Fau/Rps19/Ago1/Nop53/Eif3k/Eif3b/Rpl38/Rpl5/Rps15/Rpl13a/Eif2s2/Rps27	33
BP	GO:0071826	protein-RNA complex organization	33/706	183/13469	0.180328	3.44028	7.81709	3.67757e-10	1.76891e-07	1.68609e-07	Prpf6/Snrnp200/Ruvbl2/Rps25/Rps5/Srsf6/Ddx39b/Xab2/Prpf8/Eif5/Eif3e/Hsp90ab1/Rps14/Eif3a/Sf3b1/Snrpb/Rps6/Eif3i/Sf3a3/Eif3c/Rpsa/Fau/Rps19/Ago1/Nop53/Eif3k/Eif3b/Rpl38/Rpl5/Rps15/Rpl13a/Eif2s2/Rps27	33
BP	GO:0008380	RNA splicing	50/706	408/13469	0.122549	2.33798	6.45459	1.69097e-08	7.32021e-06	6.97748e-06	Arvcf/Fam50a/Supt6/Prpf6/Ddx23/Snrnp200/Hnrnpa2b1/Wdr83/Hnrnph1/Hnrnpl/Hspa8/Srsf6/C1qbp/Ddx39b/Xab2/Prpf8/Eftud2/Acin1/Ivns1abp/Cdc5l/Sf3b2/Rps26/Sf3b1/Ncl/Snrpb/Ybx1/Ppie/Sfpq/Sf3a3/Dhx15/Srsf9/Snrpa1/Fus/Nono/Syncrip/Sf3b3/Srsf2/Ddx1/Upf3a/Sart1/Hnrnpa1/Npm1/Hnrnpa3/Hnrnpm/Atxn7l3/Hnrnpc/Sf3b4/Rbm47/Rps13/Malat1	50
BP	GO:0006397	mRNA processing	53/706	449/13469	0.11804	2.25196	6.34578	2.25078e-08	8.85784e-06	8.44312e-06	Arvcf/Fam50a/Supt6/Prpf6/Ddx23/Snrnp200/Hnrnpa2b1/Wdr83/Hnrnph1/Hnrnpl/Hspa8/Srsf6/C1qbp/Ddx39b/Xab2/Prpf8/Eftud2/Nsun2/Acin1/Ivns1abp/Cdc5l/Sf3b2/Sf3b1/Ncl/Snrpb/Xrn2/Ybx1/Ppie/Sfpq/Sf3a3/Dhx15/Srsf9/Snrpa1/Nono/Syncrip/Sf3b3/Srsf2/Ddx1/Upf3a/Sart1/Leo1/Safb2/Hnrnpa1/Pcbp1/Cpsf3/Npm1/Hnrnpa3/Hnrnpm/Hnrnpc/Rnasel/Sf3b4/Rbm47/Malat1	53
BP	GO:0016072	rRNA metabolic process	35/706	242/13469	0.144628	2.7592	6.49486	4.35687e-08	1.57174e-05	1.49815e-05	Nhp2/Bud23/Rps25/Pelp1/Ubtf/Wdr46/Rps14/Rps24/Exosc7/Rpl14/Ncl/Gar1/Nol6/Rps6/Dhx37/Smarca4/Wdr3/Rps16/Sart1/Rps19/Utp4/Nop53/Rpl7/Fbl/Polr1a/Heatr1/Utp18/Npm1/Rpl5/Rpl7a/Rpl27/Rps15/Rpl7l1/Rnasel/Rps27	35
BP	GO:0006364	rRNA processing	32/706	210/13469	0.152381	2.90711	6.551	4.7761e-08	1.59044e-05	1.51598e-05	Nhp2/Bud23/Rps25/Pelp1/Wdr46/Rps14/Rps24/Exosc7/Rpl14/Ncl/Gar1/Nol6/Rps6/Dhx37/Wdr3/Rps16/Sart1/Rps19/Utp4/Nop53/Rpl7/Fbl/Heatr1/Utp18/Npm1/Rpl5/Rpl7a/Rpl27/Rps15/Rpl7l1/Rnasel/Rps27	32
BP	GO:0006417	regulation of translation	42/706	328/13469	0.128049	2.4429	6.2221	7.08032e-08	2.18933e-05	2.08683e-05	Hnrnpd/Eif2b5/Tpr/Cdk4/Rplp1/Rpl10/C1qbp/Ddx39b/Rack1/Eif5/Eif3e/Larp4/Lrpprc/Rps14/Tyms/Ncl/Caprin1/Pum1/Ybx1/Pink1/Cnbp/Rps4x/Syncrip/Eef2/Serbp1/Larp1/Upf3a/Mtg1/Alkbh3/Ago1/Nhlrc3/Eif4g1/Pcbp1/Eif3k/Eif3b/Npm1/Rpl38/Abce1/Rpl5/Rpl13a/Eif5a/Bc1	42
BP	GO:0000375	RNA splicing, via transesterification reactions	36/706	263/13469	0.136882	2.61142	6.20697	1.1634e-07	2.85326e-05	2.71967e-05	Prpf6/Ddx23/Snrnp200/Hnrnpa2b1/Wdr83/Hnrnpl/Hspa8/Srsf6/C1qbp/Ddx39b/Xab2/Prpf8/Eftud2/Acin1/Cdc5l/Sf3b2/Sf3b1/Ncl/Snrpb/Ppie/Sfpq/Sf3a3/Srsf9/Snrpa1/Sf3b3/Srsf2/Upf3a/Sart1/Hnrnpa1/Npm1/Hnrnpa3/Hnrnpm/Hnrnpc/Sf3b4/Rbm47/Malat1	36
BP	GO:0000377	RNA splicing, via transesterification reactions with bulged adenosine as nucleophile	36/706	263/13469	0.136882	2.61142	6.20697	1.1634e-07	2.85326e-05	2.71967e-05	Prpf6/Ddx23/Snrnp200/Hnrnpa2b1/Wdr83/Hnrnpl/Hspa8/Srsf6/C1qbp/Ddx39b/Xab2/Prpf8/Eftud2/Acin1/Cdc5l/Sf3b2/Sf3b1/Ncl/Snrpb/Ppie/Sfpq/Sf3a3/Srsf9/Snrpa1/Sf3b3/Srsf2/Upf3a/Sart1/Hnrnpa1/Npm1/Hnrnpa3/Hnrnpm/Hnrnpc/Sf3b4/Rbm47/Malat1	36
BP	GO:0000398	mRNA splicing, via spliceosome	36/706	263/13469	0.136882	2.61142	6.20697	1.1634e-07	2.85326e-05	2.71967e-05	Prpf6/Ddx23/Snrnp200/Hnrnpa2b1/Wdr83/Hnrnpl/Hspa8/Srsf6/C1qbp/Ddx39b/Xab2/Prpf8/Eftud2/Acin1/Cdc5l/Sf3b2/Sf3b1/Ncl/Snrpb/Ppie/Sfpq/Sf3a3/Srsf9/Snrpa1/Sf3b3/Srsf2/Upf3a/Sart1/Hnrnpa1/Npm1/Hnrnpa3/Hnrnpm/Hnrnpc/Sf3b4/Rbm47/Malat1	36
BP	GO:0010608	post-transcriptional regulation of gene expression	53/706	472/13469	0.112288	2.14222	5.94125	1.18639e-07	2.85326e-05	2.71967e-05	Hnrnpd/Mov10/Eif2b5/Tpr/Cdk4/Rplp1/Rpl10/Pabpc4/C1qbp/Ddx39b/Cdc37/Rack1/Eif5/Nsun2/Eif3e/Larp4/Lrpprc/Rps14/Tyms/Ncl/Caprin1/Pum1/Ybx1/Pink1/Cnbp/Fus/Rps4x/Syncrip/Eef2/Apex1/Serbp1/Larp1/Upf3a/Mtg1/Alkbh3/Ago1/Nhlrc3/Eif4g1/Pcbp1/Eif3k/Eif3b/Npm1/Rpl38/Abce1/Rpl5/Hnrnpc/Rnasel/Xpo5/Rbm47/Rpl13a/Eif5a/Eloc/Bc1	53
BP	GO:0042255	ribosome assembly	15/706	61/13469	0.245902	4.69129	6.79576	3.94728e-07	8.99356e-05	8.57248e-05	Rps25/Rps5/C1qbp/Eif5/Rps14/Rps6/Dhx37/Rpsa/Fau/Rps19/Nop53/Rpl38/Rpl5/Rps15/Rps27	15
BP	GO:0000028	ribosomal small subunit assembly	9/706	22/13469	0.409091	7.8046	7.5124	7.62346e-07	0.00016501	0.000157284	Rps25/Rps5/Rps14/Rps6/Rpsa/Fau/Rps19/Rps15/Rps27	9
BP	GO:0006413	translational initiation	20/706	115/13469	0.173913	3.3179	5.87104	1.97353e-06	0.000406829	0.000387781	Eif2b5/Tpr/Eif5/Eif3e/Eif4a2/Eif3a/Eif3i/Eif3c/Larp1/Eif4h/Eif4g1/Eif3k/Eif3b/Npm1/Abce1/Eif4b/Eif4a1/Rpl13a/Eif2s2/Bc1	20
BP	GO:0002183	cytoplasmic translational initiation	12/706	45/13469	0.266667	5.08744	6.45943	2.27804e-06	0.000448256	0.000427269	Eif2b5/Eif5/Eif3e/Eif4a2/Eif3a/Eif3i/Eif3c/Eif3k/Eif3b/Eif4a1/Rpl13a/Eif2s2	12
BP	GO:1904851	positive regulation of establishment of protein localization to telomere	6/706	10/13469	0.6	11.4467	7.77234	3.55779e-06	0.000669638	0.000638286	Cct4/Cct5/Cct8/Cct6a/Cct7/Cct2	6
BP	GO:0001732	formation of cytoplasmic translation initiation complex	7/706	15/13469	0.466667	8.90302	7.20262	4.69256e-06	0.00084642	0.000806791	Eif5/Eif3e/Eif3a/Eif3i/Eif3c/Eif3k/Eif3b	7
BP	GO:0045727	positive regulation of translation	20/706	129/13469	0.155039	2.95781	5.25492	1.20257e-05	0.00208238	0.00198488	Hnrnpd/Eif2b5/Cdk4/C1qbp/Ddx39b/Eif3e/Larp4/Ybx1/Pink1/Cnbp/Rps4x/Syncrip/Eef2/Larp1/Upf3a/Eif4g1/Pcbp1/Npm1/Rpl5/Eif5a	20
BP	GO:0031647	regulation of protein stability	36/706	321/13469	0.11215	2.13958	4.86009	1.34355e-05	0.002237	0.00213227	Glmp/Phb2/Cct4/Tbrg1/Hspa8/Ctsa/Pfn1/Septin8/Cdc37/Rtn4/Ccdc88c/Sugt1/Cct5/Wnt10b/Hsp90ab1/Bag6/Btrc/Usp33/Cct8/Tspan1/Pink1/Tomm7/Cct6a/Cct7/Pycard/Cct2/Grn/Ubr5/Hip1/Nop53/Usp48/Cenpe/Npm1/Rpl5/H1f5/Rpl23	36
BP	GO:0070203	regulation of establishment of protein localization to telomere	6/706	12/13469	0.5	9.53895	6.95983	1.42956e-05	0.00229206	0.00218475	Cct4/Cct5/Cct8/Cct6a/Cct7/Cct2	6
BP	GO:0070202	regulation of establishment of protein localization to chromosome	6/706	13/13469	0.461538	8.80519	6.62178	2.53724e-05	0.00376865	0.0035922	Cct4/Cct5/Cct8/Cct6a/Cct7/Cct2	6
BP	GO:1904816	positive regulation of protein localization to chromosome, telomeric region	6/706	13/13469	0.461538	8.80519	6.62178	2.53724e-05	0.00376865	0.0035922	Cct4/Cct5/Cct8/Cct6a/Cct7/Cct2	6
BP	GO:0050821	protein stabilization	25/706	193/13469	0.129534	2.47123	4.84176	2.61168e-05	0.00376865	0.0035922	Glmp/Phb2/Cct4/Tbrg1/Pfn1/Cdc37/Rtn4/Cct5/Wnt10b/Hsp90ab1/Bag6/Usp33/Cct8/Tspan1/Pink1/Cct6a/Cct7/Cct2/Grn/Hip1/Nop53/Npm1/Rpl5/H1f5/Rpl23	25
BP	GO:0090407	organophosphate biosynthetic process	45/706	458/13469	0.0982533	1.87447	4.47814	3.54814e-05	0.0049548	0.00472282	Pemt/Ckb/Impdh1/Lpcat3/Aprt/Plcd1/Cad/Plcg1/Isyna1/Ndufa12/Rrm2/Pfas/Mthfd1/Ndufs6/Hexb/Tkt/Pmm1/Gart/Ndufa5/Nme4/Chka/Pcyt2/Tyms/Idh1/Atic/Parp1/Ak8/Lpcat4/Sord/Stoml2/Fabp3/Pank4/Gfpt1/Idh2/Cdipt/Cln3/Acsl4/Pdha1/Ndufa3/Amdhd2/Hk1/Ndufv1/Dgkz/Gk5/Impdh2	45
BP	GO:0010833	telomere maintenance via telomere lengthening	14/706	78/13469	0.179487	3.42424	5.05003	4.68037e-05	0.00633166	0.00603521	Hnrnpd/Nhp2/Hnrnpa2b1/Cct4/Cct5/Hsp90ab1/Tnks2/Cct8/Parp1/Gar1/Cct6a/Cct7/Cct2/Hnrnpc	14
BP	GO:0033119	negative regulation of RNA splicing	8/706	27/13469	0.296296	5.65271	5.69159	4.99337e-05	0.00655039	0.0062437	Hnrnpa2b1/Srsf6/C1qbp/Acin1/Rps26/Srsf9/Npm1/Rps13	8
BP	GO:0070199	establishment of protein localization to chromosome	8/706	28/13469	0.285714	5.45083	5.54475	6.67207e-05	0.00836089	0.00796943	Ruvbl2/Cct4/Cct5/Cct8/Cct6a/Cct7/Cct2/H1f5	8
BP	GO:0006177	GMP biosynthetic process	6/706	15/13469	0.4	7.63116	6.04348	6.75979e-05	0.00836089	0.00796943	Impdh1/Aprt/Pfas/Gart/Atic/Impdh2	6
BP	GO:1901293	nucleoside phosphate biosynthetic process	27/706	234/13469	0.115385	2.2013	4.35987	9.7847e-05	0.0117661	0.0112152	Impdh1/Aprt/Cad/Ndufa12/Rrm2/Pfas/Mthfd1/Ndufs6/Pmm1/Gart/Ndufa5/Nme4/Tyms/Atic/Parp1/Ak8/Stoml2/Pank4/Gfpt1/Idh2/Acsl4/Pdha1/Ndufa3/Amdhd2/Hk1/Ndufv1/Impdh2	27
BP	GO:1904814	regulation of protein localization to chromosome, telomeric region	6/706	16/13469	0.375	7.15421	5.79296	0.000103377	0.0120951	0.0115288	Cct4/Cct5/Cct8/Cct6a/Cct7/Cct2	6
BP	GO:0030261	chromosome condensation	9/706	39/13469	0.230769	4.40259	5.00474	0.000145473	0.0163453	0.01558	Ncaph2/H3f3b/Acin1/Smc5/H1f2/H1f4/H1f3/Hmga2/H1f5	9
BP	GO:0070670	response to interleukin-4	8/706	31/13469	0.258065	4.92333	5.14335	0.000147255	0.0163453	0.01558	Mcm2/Cdk4/Hsp90ab1/Alad/Rps2/Cited1/Impdh2/Rplp0	8
BP	GO:0006753	nucleoside phosphate metabolic process	45/706	488/13469	0.0922131	1.75923	4.01799	0.000158606	0.0171652	0.0163615	Impdh1/Ier3/Aprt/Cad/Hspa8/Nt5c3b/Smpdl3a/Ndufa12/Nudt4/Rrm2/Nt5c/Pfas/Mthfd1/Ndufs6/Tkt/Pmm1/Gart/Ndufa5/Nme4/Cbr2/Tyms/Idh1/Atic/Parp1/Ak8/Gpd2/Stoml2/Pank4/Ran/Gfpt1/Aldh1l1/Idh2/Acsl4/Pdha1/Nudt15/Ndufa3/Amdhd2/Hk1/Vnn1/Uggt1/Ndufv1/Gpd1l/Prkaa1/Suclg1/Impdh2	45
BP	GO:0051052	regulation of DNA metabolic process	42/706	447/13469	0.0939597	1.79255	4.00794	0.000174287	0.0184021	0.0175405	Hnrnpd/Smg5/Supt6/Ier3/Ruvbl2/Hnrnpa2b1/Msh6/Trim28/Cdt1/Cct4/Id3/Vps72/Dmap1/Ehmt2/Pfn1/C1qbp/Ddx39b/Cct5/Msh2/Tnks2/Dpf2/Cct8/Nucks1/Parp1/Smarcd3/Cct6a/Cct7/Atg7/Fus/Smarca4/Sf3b3/Cct2/H1f2/Kdm1a/Gja1/H1f4/H1f3/Hmga2/Npm1/H1f5/Atxn7l3/Hnrnpc	42
BP	GO:0000422	autophagy of mitochondrion	14/706	89/13469	0.157303	3.00102	4.45447	0.000204756	0.0206137	0.0196486	Atg4d/Phb2/Nipsnap3b/Cdc37/Atg2a/Map1lc3a/Pink1/Tomm7/Ulk1/Atg7/Cttn/Slc25a4/Gabarapl2/Atg2b	14
BP	GO:1903312	negative regulation of mRNA metabolic process	14/706	89/13469	0.157303	3.00102	4.45447	0.000204756	0.0206137	0.0196486	Hnrnpd/Hnrnpa2b1/Srsf6/C1qbp/Acin1/Ybx1/Srsf9/Fus/Syncrip/Larp1/Upf3a/Npm1/Hnrnpc/Rbm47	14
BP	GO:1902175	regulation of oxidative stress-induced intrinsic apoptotic signaling pathway	8/706	33/13469	0.242424	4.62495	4.90344	0.000236147	0.0232336	0.0221458	Rack1/Parp1/Pink1/Sfpq/Nono/Vnn1/Gpx1/Ppia	8
BP	GO:0006414	translational elongation	11/706	61/13469	0.180328	3.44028	4.49262	0.000287485	0.0265985	0.0253532	Tcf25/Rplp1/Rack1/Rplp2/Eef1b2/Eef2/Eef1a1/Eef1d/Abce1/Eef1g/Eif5a	11
BP	GO:0061077	chaperone-mediated protein folding	11/706	61/13469	0.180328	3.44028	4.49262	0.000287485	0.0265985	0.0253532	Cct4/Dnajc7/Hspa8/Cct5/Hsp90ab1/Cct8/Dnajb6/Cct6a/Cct7/Cct2/Fkbp2	11
BP	GO:0006403	RNA localization	20/706	161/13469	0.124224	2.36993	4.11274	0.000288781	0.0265985	0.0253532	Supt6/Prpf6/Hnrnpa2b1/Tpr/Cct4/Ddx39b/Nsun2/Lrpprc/Caprin1/Nol6/Ybx1/Ran/Cct2/Xpot/Sidt2/Hnrnpa1/Fbl/Hnrnpa3/Xpo5/Tomm20	20
BP	GO:0070200	establishment of protein localization to telomere	6/706	19/13469	0.315789	6.0246	5.1546	0.000305929	0.0274764	0.0261899	Cct4/Cct5/Cct8/Cct6a/Cct7/Cct2	6
BP	GO:1904951	positive regulation of establishment of protein localization	30/706	291/13469	0.103093	1.96679	3.92133	0.000311006	0.0274764	0.0261899	Trim28/Tpr/Cct4/Dmap1/Rack1/Ywhae/Cct5/Eif3e/Bsg/Hsp90ab1/Cct8/Tomm7/Ran/Cct6a/Cct7/Camk1/Atg7/Ipo5/Cln3/Acsl4/C2cd2l/Cct2/Uaca/Ubr5/Ripor1/Sfn/Prkaa1/Gja1/Hnrnpm/Ppia	30
BP	GO:0006278	RNA-templated DNA biosynthetic process	11/706	62/13469	0.177419	3.38479	4.42647	0.000333233	0.0277416	0.0264428	Hnrnpd/Nhp2/Cct4/Cct5/Hsp90ab1/Cct8/Gar1/Cct6a/Cct7/Cct2/Hnrnpc	11
BP	GO:0007004	telomere maintenance via telomerase	11/706	62/13469	0.177419	3.38479	4.42647	0.000333233	0.0277416	0.0264428	Hnrnpd/Nhp2/Cct4/Cct5/Hsp90ab1/Cct8/Gar1/Cct6a/Cct7/Cct2/Hnrnpc	11
BP	GO:1904356	regulation of telomere maintenance via telomere lengthening	11/706	62/13469	0.177419	3.38479	4.42647	0.000333233	0.0277416	0.0264428	Hnrnpd/Hnrnpa2b1/Cct4/Cct5/Tnks2/Cct8/Parp1/Cct6a/Cct7/Cct2/Hnrnpc	11
BP	GO:1903829	positive regulation of protein localization	41/706	449/13469	0.091314	1.74208	3.76137	0.000376969	0.0307906	0.0293489	Itga3/Abhd17a/Trim28/Tpr/Cct4/Dmap1/Rack1/Rtn4/Ywhae/Cct5/Eif3e/Bsg/Hsp90ab1/Cct8/Parp1/Wwtr1/Snx27/Tomm7/Ran/Cct6a/Cct7/Camk1/Atg7/Ipo5/Cln3/Acsl4/C2cd2l/Cct2/Uaca/Ubr5/Ripor1/Eif4g1/Sfn/Gpd1l/Prkaa1/Gja1/Cfl1/Npm1/Hnrnpm/Ipo7/Ppia	41
BP	GO:0009165	nucleotide biosynthetic process	20/706	165/13469	0.121212	2.31247	3.9895	0.0003999	0.0320587	0.0305577	Impdh1/Aprt/Cad/Ndufa12/Rrm2/Pfas/Mthfd1/Ndufs6/Gart/Ndufa5/Nme4/Tyms/Atic/Parp1/Ak8/Stoml2/Idh2/Ndufa3/Ndufv1/Impdh2	20
BP	GO:0032200	telomere organization	19/706	153/13469	0.124183	2.36915	4.00579	0.000407621	0.0320835	0.0305813	Hnrnpd/Nhp2/Smg5/Ruvbl2/Hnrnpa2b1/Cct4/H3f3b/Cct5/Hsp90ab1/Tnks2/Smc5/Cct8/Parp1/Gar1/Cct6a/Cct7/Cct2/Apex1/Hnrnpc	19
BP	GO:0009168	purine ribonucleoside monophosphate biosynthetic process	6/706	20/13469	0.3	5.72337	4.97164	0.000417807	0.032298	0.0307858	Impdh1/Aprt/Pfas/Gart/Atic/Impdh2	6
BP	GO:0034502	protein localization to chromosome	16/706	118/13469	0.135593	2.58683	4.07186	0.000429263	0.0326014	0.031075	Ruvbl2/Cct4/Cct5/Msh2/Tnks2/Smc5/Cct8/Parp1/Brd3/Cct6a/Cct7/Cct2/Stag3/Jarid2/Rcc2/H1f5	16
BP	GO:0009117	nucleotide metabolic process	35/706	367/13469	0.0953678	1.81942	3.74324	0.000451931	0.0337312	0.0321519	Impdh1/Ier3/Aprt/Cad/Hspa8/Nt5c3b/Ndufa12/Nudt4/Rrm2/Nt5c/Pfas/Mthfd1/Ndufs6/Tkt/Gart/Ndufa5/Nme4/Cbr2/Tyms/Idh1/Atic/Parp1/Ak8/Gpd2/Stoml2/Ran/Aldh1l1/Idh2/Nudt15/Ndufa3/Hk1/Ndufv1/Gpd1l/Prkaa1/Impdh2	35
BP	GO:0043484	regulation of RNA splicing	20/706	167/13469	0.11976	2.28478	3.92921	0.000468255	0.0342542	0.0326505	Fam50a/Hnrnpa2b1/Hnrnph1/Hnrnpl/Hspa8/Srsf6/C1qbp/Acin1/Rps26/Ncl/Srsf9/Fus/Sf3b3/Srsf2/Upf3a/Npm1/Atxn7l3/Rbm47/Rps13/Malat1	20
BP	GO:0009167	purine ribonucleoside monophosphate metabolic process	7/706	28/13469	0.25	4.76948	4.69593	0.000474764	0.0342542	0.0326505	Impdh1/Aprt/Nt5c/Pfas/Gart/Atic/Impdh2	7
BP	GO:0031099	regeneration	20/706	169/13469	0.118343	2.25774	3.86978	0.00054654	0.0374093	0.0356578	Klf5/Nanog/Cad/Cers2/Rtn4/Wnt10b/Akirin1/Igf2r/Tyms/Atic/Ulk1/Cd9/Grn/Map2k2/Ptpn3/Sox15/Gja1/Rpl32/Rps15/Gpx1	20
BP	GO:0000423	mitophagy	12/706	76/13469	0.157895	3.0123	4.1375	0.00055321	0.0374093	0.0356578	Atg4d/Phb2/Nipsnap3b/Cdc37/Map1lc3a/Pink1/Tomm7/Ulk1/Atg7/Cttn/Slc25a4/Gabarapl2	12
BP	GO:0046037	GMP metabolic process	6/706	21/13469	0.285714	5.45083	4.80064	0.000559214	0.0374093	0.0356578	Impdh1/Aprt/Pfas/Gart/Atic/Impdh2	6
BP	GO:1903311	regulation of mRNA metabolic process	28/706	274/13469	0.10219	1.94957	3.73485	0.000560967	0.0374093	0.0356578	Hnrnpd/Supt6/Mov10/Hnrnpa2b1/Pabpc4/Hnrnpl/Hspa8/Srsf6/C1qbp/Acin1/Ncl/Caprin1/Pum1/Ybx1/Srsf9/Fus/Syncrip/Srsf2/Apex1/Larp1/Upf3a/Ago1/Safb2/Npm1/Hnrnpc/Rnasel/Rbm47/Malat1	28
BP	GO:0019079	viral genome replication	14/706	98/13469	0.142857	2.72541	4.03183	0.000566583	0.0374093	0.0356578	Trim28/Hspa8/Smc5/Nr5a2/Nucks1/Ppie/Atg7/Larp1/Eef1a1/Atg16l2/Pcbp1/Hmga2/Rnasel/Ppia	14
BP	GO:1900182	positive regulation of protein localization to nucleus	13/706	87/13469	0.149425	2.85072	4.07303	0.000570343	0.0374093	0.0356578	Trim28/Tpr/Dmap1/Hsp90ab1/Parp1/Wwtr1/Ran/Ipo5/Uaca/Ubr5/Npm1/Hnrnpm/Ipo7	13
BP	GO:0071353	cellular response to interleukin-4	7/706	29/13469	0.241379	4.60501	4.57071	0.000597844	0.0386279	0.0368193	Mcm2/Cdk4/Hsp90ab1/Alad/Rps2/Impdh2/Rplp0	7
BP	GO:0000723	telomere maintenance	18/706	147/13469	0.122449	2.33607	3.83072	0.000678719	0.0428847	0.0408768	Hnrnpd/Nhp2/Smg5/Ruvbl2/Hnrnpa2b1/Cct4/Cct5/Hsp90ab1/Tnks2/Smc5/Cct8/Parp1/Gar1/Cct6a/Cct7/Cct2/Apex1/Hnrnpc	18
BP	GO:0009152	purine ribonucleotide biosynthetic process	15/706	112/13469	0.133929	2.55508	3.88672	0.000732462	0.0428847	0.0408768	Impdh1/Aprt/Ndufa12/Pfas/Mthfd1/Ndufs6/Gart/Ndufa5/Nme4/Atic/Parp1/Stoml2/Ndufa3/Ndufv1/Impdh2	15
BP	GO:0002070	epithelial cell maturation	6/706	22/13469	0.272727	5.20306	4.64026	0.000735149	0.0428847	0.0408768	Epas1/Tyms/Tfcp2l1/Cebpa/Foxa1/Gja1	6
BP	GO:0009127	purine nucleoside monophosphate biosynthetic process	6/706	22/13469	0.272727	5.20306	4.64026	0.000735149	0.0428847	0.0408768	Impdh1/Aprt/Pfas/Gart/Atic/Impdh2	6
BP	GO:0048025	negative regulation of mRNA splicing, via spliceosome	6/706	22/13469	0.272727	5.20306	4.64026	0.000735149	0.0428847	0.0408768	Hnrnpa2b1/Srsf6/C1qbp/Acin1/Srsf9/Npm1	6
BP	GO:0050686	negative regulation of mRNA processing	6/706	22/13469	0.272727	5.20306	4.64026	0.000735149	0.0428847	0.0408768	Hnrnpa2b1/Srsf6/C1qbp/Acin1/Srsf9/Npm1	6
BP	GO:0009260	ribonucleotide biosynthetic process	16/706	124/13469	0.129032	2.46166	3.84571	0.00074844	0.0428847	0.0408768	Impdh1/Aprt/Cad/Ndufa12/Pfas/Mthfd1/Ndufs6/Gart/Ndufa5/Nme4/Atic/Parp1/Stoml2/Ndufa3/Ndufv1/Impdh2	16
BP	GO:2000767	positive regulation of cytoplasmic translation	5/706	15/13469	0.333333	6.3593	4.88434	0.000754298	0.0428847	0.0408768	Hnrnpd/Ybx1/Cnbp/Syncrip/Eef2	5
BP	GO:0046824	positive regulation of nucleocytoplasmic transport	11/706	68/13469	0.161765	3.08613	4.05607	0.000755563	0.0428847	0.0408768	Trim28/Tpr/Dmap1/Ywhae/Hsp90ab1/Ran/Camk1/Ipo5/Uaca/Ubr5/Sfn	11
BP	GO:0009123	nucleoside monophosphate metabolic process	10/706	58/13469	0.172414	3.28929	4.10925	0.000779005	0.0428847	0.0408768	Impdh1/Aprt/Cad/Nt5c/Pfas/Gart/Tyms/Atic/Ak8/Impdh2	10
BP	GO:0009124	nucleoside monophosphate biosynthetic process	8/706	39/13469	0.205128	3.91342	4.28523	0.000792216	0.0428847	0.0408768	Impdh1/Aprt/Cad/Pfas/Gart/Tyms/Atic/Impdh2	8
BP	GO:1904358	positive regulation of telomere maintenance via telomere lengthening	8/706	39/13469	0.205128	3.91342	4.28523	0.000792216	0.0428847	0.0408768	Hnrnpd/Hnrnpa2b1/Cct4/Cct5/Cct8/Cct6a/Cct7/Cct2	8
BP	GO:0006913	nucleocytoplasmic transport	30/706	308/13469	0.0974026	1.85824	3.58357	0.000802416	0.0428847	0.0408768	Supt6/Ier3/Phb2/Hnrnpa2b1/Trim28/Tpr/Pttg1ip/Dmap1/Hspa8/Ddx39b/Ltv1/Ywhae/Nsun2/Hsp90ab1/Nol6/Ran/Camk1/Ipo5/Tnpo2/Uaca/Xpot/Ubr5/Hnrnpa1/Sfn/Cited1/Cfl1/Npm1/Rps15/Ipo7/Xpo5	30
BP	GO:0051169	nuclear transport	30/706	308/13469	0.0974026	1.85824	3.58357	0.000802416	0.0428847	0.0408768	Supt6/Ier3/Phb2/Hnrnpa2b1/Trim28/Tpr/Pttg1ip/Dmap1/Hspa8/Ddx39b/Ltv1/Ywhae/Nsun2/Hsp90ab1/Nol6/Ran/Camk1/Ipo5/Tnpo2/Uaca/Xpot/Ubr5/Hnrnpa1/Sfn/Cited1/Cfl1/Npm1/Rps15/Ipo7/Xpo5	30
BP	GO:2001252	positive regulation of chromosome organization	15/706	114/13469	0.131579	2.51025	3.80853	0.00088285	0.046608	0.0444258	Hnrnpd/Ruvbl2/Hnrnpa2b1/Trim28/Tpr/Cct4/Ncaph2/Cct5/Tnks2/Smc5/Cct8/Sfpq/Cct6a/Cct7/Cct2	15
BP	GO:0009126	purine nucleoside monophosphate metabolic process	7/706	31/13469	0.225806	4.30791	4.33656	0.000919292	0.0473764	0.0451582	Impdh1/Aprt/Nt5c/Pfas/Gart/Atic/Impdh2	7
BP	GO:0009156	ribonucleoside monophosphate biosynthetic process	7/706	31/13469	0.225806	4.30791	4.33656	0.000919292	0.0473764	0.0451582	Impdh1/Aprt/Cad/Pfas/Gart/Atic/Impdh2	7
BP	GO:0009161	ribonucleoside monophosphate metabolic process	8/706	40/13469	0.2	3.81558	4.19424	0.000945499	0.0478696	0.0456284	Impdh1/Aprt/Cad/Nt5c/Pfas/Gart/Atic/Impdh2	8
BP	GO:0016237	microautophagy	6/706	23/13469	0.26087	4.97684	4.48935	0.000950979	0.0478696	0.0456284	Atg4d/Hspa8/Atg2a/Ulk1/Atg7/Atg2b	6
CC	GO:0022626	cytosolic ribosome	64/724	119/13576	0.537815	10.0848	23.6248	5.05799e-50	2.61498e-47	2.31603e-47	Rpl13/Rps11/Rpl8/Rplp1/Rps18/Rpl10/Rps15a/Rps25/Rpl15/Rps5/Rpl19/Rps27a/Larp4/Rps14/Rps24/Rps26/Rplp2/Rpl14/Rps3a1/Rps6/Rpl6/Rps4x/Rpl4/Rpsa/Rps29/Rps16/Eef1a1/Rpl10a/Fau/Rpl12/Rps19/Rpl21/Rpl37/Rpl7/Rps2/Rpl18a/Rpl37a/Rpl27a/Rpl9/Rpl29/Rps23/Rpl38/Rpl32/Abce1/Rpl23a/Rpl5/Rpl30/Rpl18/Rps12/Rpl34/Rpl17/Rpl9-ps6/Rpl7a/Rps4l/Rpl27/Rps15/Rpl7l1/Rplp0/Rpl23/Rpl13a/Rpl36a/Rps27/Rps13/Rpl6l	64
CC	GO:0044391	ribosomal subunit	70/724	192/13576	0.364583	6.83644	19.3312	2.20306e-40	5.69492e-38	5.04386e-38	Rpl13/Rps11/Rpl8/Rplp1/Rps18/Rpl10/Rps15a/Rps25/Rpl15/Rps5/Rpl19/Rack1/Rps27a/Mrpl22/Mrpl36/Larp4/Rps14/Rps24/Rps26/Rplp2/Rpl14/Rps3a1/Rps6/Rpl6/Mrpl19/Rps4x/Rpl4/Rpsa/Gadd45gip1/Mrpl15/Rps29/Rps16/Rpl10a/Fau/Rpl12/Rps19/Rpl21/Rpl37/Rpl7/Rps2/Rpl18a/Rpl37a/Rpl27a/Rpl9/Rpl29/Rps23/Npm1/Rpl38/Rpl32/Rpl23a/Rpl5/Rpl30/Rpl18/Rps12/Rpl34/Rpl17/Rpl9-ps6/Rpl7a/Rps4l/Rpl27/Rps15/Rpl7l1/Rplp0/Rps18-ps6/Rpl…	70
CC	GO:0005840	ribosome	75/724	236/13576	0.317797	5.95913	18.2405	1.97285e-38	3.39988e-36	3.01119e-36	Rpl13/Rps11/Rpl8/Rplp1/Rps18/Rpl10/Rps15a/Rps25/Rpl15/Rps5/Rpl19/Rack1/Rps27a/Mrpl22/Mrpl36/Larp4/Rps14/Rps24/Rps26/Rplp2/Rpl14/Rps3a1/Rps6/Rpl6/Mrpl19/Rps4x/Rpl4/Rpsa/Gadd45gip1/Mrpl15/Rps29/Eef2/Rps16/Eef1a1/Rpl10a/Fau/Rpl12/Mtg1/Rps19/Rpl21/Rpl37/Rpl7/Rps2/Rpl18a/Eif4g1/Rpl37a/Rpl27a/Rpl9/Rpl29/Rps23/Npm1/Rpl38/Rpl32/Abce1/Rpl23a/Rpl5/Rpl30/Rpl18/Rps12/Rpl34/Rpl17/Rpl9-ps6/Rpl7a/Rps4l/Rpl27/Rp…	75
CC	GO:0022625	cytosolic large ribosomal subunit	38/724	59/13576	0.644068	12.0772	20.238	2.95985e-34	3.82561e-32	3.38825e-32	Rpl13/Rpl8/Rplp1/Rpl10/Rpl15/Rpl19/Rplp2/Rpl14/Rpl6/Rpl4/Rpl10a/Rpl12/Rpl21/Rpl37/Rpl7/Rpl18a/Rpl37a/Rpl27a/Rpl9/Rpl29/Rpl38/Rpl32/Rpl23a/Rpl5/Rpl30/Rpl18/Rps12/Rpl34/Rpl17/Rpl9-ps6/Rpl7a/Rpl27/Rpl7l1/Rplp0/Rpl23/Rpl13a/Rpl36a/Rpl6l	38
CC	GO:0015934	large ribosomal subunit	44/724	117/13576	0.376068	7.0518	15.6036	2.29899e-26	2.37716e-24	2.10539e-24	Rpl13/Rpl8/Rplp1/Rpl10/Rpl15/Rpl19/Mrpl22/Mrpl36/Rplp2/Rpl14/Rpl6/Mrpl19/Rpl4/Gadd45gip1/Mrpl15/Rpl10a/Rpl12/Rpl21/Rpl37/Rpl7/Rpl18a/Rpl37a/Rpl27a/Rpl9/Rpl29/Npm1/Rpl38/Rpl32/Rpl23a/Rpl5/Rpl30/Rpl18/Rps12/Rpl34/Rpl17/Rpl9-ps6/Rpl7a/Rpl27/Rpl7l1/Rplp0/Rpl23/Rpl13a/Rpl36a/Rpl6l	44
CC	GO:0022627	cytosolic small ribosomal subunit	25/724	42/13576	0.595238	11.1615	15.654	1.07685e-21	9.27887e-20	8.21808e-20	Rps11/Rps18/Rps15a/Rps25/Rps5/Rps27a/Larp4/Rps14/Rps24/Rps26/Rps3a1/Rps6/Rps4x/Rpsa/Rps29/Rps16/Fau/Rps19/Rps2/Rps23/Rps12/Rps4l/Rps15/Rps27/Rps13	25
CC	GO:0015935	small ribosomal subunit	28/724	79/13576	0.35443	6.64606	11.9452	1.93816e-16	1.43147e-14	1.26782e-14	Rps11/Rps18/Rps15a/Rps25/Rps5/Rack1/Rps27a/Larp4/Rps14/Rps24/Rps26/Rps3a1/Rps6/Rps4x/Rpsa/Rps29/Rps16/Fau/Rps19/Rps2/Rps23/Npm1/Rps12/Rps4l/Rps15/Rps18-ps6/Rps27/Rps13	28
CC	GO:0032040	small-subunit processome	24/724	73/13576	0.328767	6.16484	10.5016	1.90706e-13	1.23244e-11	1.09154e-11	Rps11/Rps15a/Rps5/Aatf/Rps27a/Wdr46/Rps14/Rps24/Rps3a1/Nol6/Rps6/Dhx37/Rps4x/Wdr3/Rps16/Rps19/Utp4/Fbl/Rps23/Heatr1/Utp18/Rps12/Rps27/Rps13	24
CC	GO:0030684	preribosome	25/724	105/13576	0.238095	4.46461	8.4587	1.67491e-10	9.62144e-09	8.52148e-09	Rps11/Rps15a/Rps5/Aatf/Ltv1/Rps27a/Wdr46/Rps14/Rps24/Rps3a1/Nol6/Rps6/Dhx37/Rps4x/Wdr3/Rps16/Rps19/Utp4/Fbl/Rps23/Heatr1/Utp18/Rps12/Rps27/Rps13	25
CC	GO:0071013	catalytic step 2 spliceosome	23/724	94/13576	0.244681	4.5881	8.28525	5.04961e-10	2.61065e-08	2.31219e-08	Prpf6/Ddx23/Snrnp200/Hnrnpa2b1/Wdr83/Hnrnph1/Xab2/Prpf8/Eftud2/Cdc5l/Sf3b2/Sf3b1/Snrpb/Ppie/Sf3a3/Snrpa1/Syncrip/Sf3b3/Sart1/Hnrnpa1/Hnrnpa3/Hnrnpm/Hnrnpc	23
CC	GO:0005838	proteasome regulatory particle	11/724	22/13576	0.5	9.37569	9.33151	3.7857e-09	1.77928e-07	1.57587e-07	Psmd4/Psmd2/Psmc5/Psmd12/Psmc1/Psmd6/Psmc6/Psmd1/Psmd8/Psmc4/Psmd7	11
CC	GO:0005681	spliceosomal complex	32/724	197/13576	0.162437	3.04591	6.86533	1.50405e-08	6.47997e-07	5.73915e-07	Prpf6/Ddx23/Snrnp200/Hnrnpa2b1/Wdr83/Hnrnph1/Dqx1/Hspa8/Ddx39b/Xab2/Prpf8/Eftud2/Cdc5l/Sf3b2/Sf3b1/Ncl/Api5/Snrpb/Ybx1/Ppie/Sf3a3/Dhx15/Snrpa1/Syncrip/Sf3b3/Srsf2/Sart1/Hnrnpa1/Hnrnpa3/Hnrnpm/Hnrnpc/Sf3b4	32
CC	GO:0022624	proteasome accessory complex	11/724	25/13576	0.44	8.25061	8.61217	2.06383e-08	8.20768e-07	7.26934e-07	Psmd4/Psmd2/Psmc5/Psmd12/Psmc1/Psmd6/Psmc6/Psmd1/Psmd8/Psmc4/Psmd7	11
CC	GO:0101031	protein folding chaperone complex	12/724	37/13576	0.324324	6.08153	7.34608	2.6066e-07	9.62578e-06	8.52533e-06	Ppp5c/Ruvbl2/Cct4/Hspa8/Cdc37/Cct5/Hsp90ab1/Stip1/Cct8/Cct6a/Cct7/Cct2	12
CC	GO:0008540	proteasome regulatory particle, base subcomplex	7/724	12/13576	0.583333	10.9383	8.17453	7.46249e-07	2.57207e-05	2.27802e-05	Psmd4/Psmd2/Psmc5/Psmc1/Psmc6/Psmd1/Psmc4	7
CC	GO:0097525	spliceosomal snRNP complex	14/724	61/13576	0.229508	4.3036	6.13759	2.88269e-06	9.3147e-05	8.24981e-05	Prpf6/Ddx23/Snrnp200/Ddx39b/Prpf8/Eftud2/Sf3b2/Sf3b1/Snrpb/Sf3a3/Snrpa1/Sf3b3/Sart1/Sf3b4	14
CC	GO:0000502	proteasome complex	14/724	62/13576	0.225806	4.23418	6.0579	3.54321e-06	0.000107755	9.54364e-05	Psmd4/Psmd2/Psmb1/Psmb6/Psmc5/Psmd12/Psmc1/Psmd6/Psmc6/Psmd1/Psma7/Psmd8/Psmc4/Psmd7	14
CC	GO:0005832	chaperonin-containing T-complex	6/724	10/13576	0.6	11.2508	7.69639	3.9352e-06	0.000113028	0.000100106	Cct4/Cct5/Cct8/Cct6a/Cct7/Cct2	6
CC	GO:0032279	asymmetric synapse	42/724	387/13576	0.108527	2.03503	4.90295	9.12948e-06	0.000248418	0.000220018	Hnrnpd/Abhd17a/Rpl8/Phb2/Hnrnpa2b1/Hnrnph1/Rps18/Rps25/Hspa8/Rtn4/Dbnl/Eif3e/Rps14/Eif3a/Rpl14/Macf1/Rpl6/Camk1/Snx1/Rpl4/Atp1a1/Grn/Rpl10a/Rpl12/Dgkz/Rps19/Arhgap32/Rpl7/Rpl18a/Pcbp1/Cfl1/Rpl38/Rpl5/Rpl30/Hnrnpa3/Hnrnpm/Chd4/Rplp0/Rpl23/Pak6/Rps27/Rps13	42
CC	GO:1905369	endopeptidase complex	16/724	87/13576	0.183908	3.44853	5.43787	1.23066e-05	0.000318126	0.000281756	Psmd4/Psmd2/Psmb1/Psmb6/Psmc5/Psmd12/Psmc1/Psmd6/Psmc6/Capn1/Psmd1/Psma7/Pmpcb/Psmd8/Psmc4/Psmd7	16
CC	GO:0030532	small nuclear ribonucleoprotein complex	14/724	69/13576	0.202899	3.80463	5.54337	1.33146e-05	0.000326104	0.000288823	Prpf6/Ddx23/Snrnp200/Ddx39b/Prpf8/Eftud2/Sf3b2/Sf3b1/Snrpb/Sf3a3/Snrpa1/Sf3b3/Sart1/Sf3b4	14
CC	GO:0071005	U2-type precatalytic spliceosome	12/724	52/13576	0.230769	4.32724	5.70542	1.38768e-05	0.000326104	0.000288823	Prpf6/Snrnp200/Prpf8/Eftud2/Sf3b2/Sf3b1/Snrpb/Sf3a3/Snrpa1/Sf3b3/Sart1/Sf3b4	12
CC	GO:0014069	postsynaptic density	40/724	371/13576	0.107817	2.02171	4.73587	1.73733e-05	0.000390522	0.000345876	Hnrnpd/Abhd17a/Rpl8/Phb2/Hnrnpa2b1/Hnrnph1/Rps18/Rps25/Hspa8/Rtn4/Dbnl/Eif3e/Rps14/Eif3a/Rpl14/Macf1/Rpl6/Camk1/Snx1/Rpl4/Atp1a1/Rpl10a/Rpl12/Dgkz/Rps19/Arhgap32/Rpl7/Rpl18a/Pcbp1/Cfl1/Rpl38/Rpl5/Rpl30/Hnrnpa3/Hnrnpm/Rplp0/Rpl23/Pak6/Rps27/Rps13	40
CC	GO:0000786	nucleosome	16/724	90/13576	0.177778	3.33358	5.27176	1.92065e-05	0.000413739	0.000366439	Ruvbl2/Vps72/Dmap1/H3f3b/H1f2/H1f4/H1f3/H1f5/H2ac15/H4c12/H4c11/H2ac20/H3c6/H3c4/H3c11/H2bc14	16
CC	GO:0071011	precatalytic spliceosome	12/724	54/13576	0.222222	4.16697	5.53445	2.09066e-05	0.000432348	0.000382921	Prpf6/Snrnp200/Prpf8/Eftud2/Sf3b2/Sf3b1/Snrpb/Sf3a3/Snrpa1/Sf3b3/Sart1/Sf3b4	12
CC	GO:0098984	neuron to neuron synapse	43/724	420/13576	0.102381	1.91978	4.54467	2.99949e-05	0.000588257	0.000521006	Hnrnpd/Abhd17a/Rpl8/Phb2/Hnrnpa2b1/Hnrnph1/Rps18/Rps25/Hspa8/Rtn4/Dbnl/Sumo2/Eif3e/Rps14/Eif3a/Rpl14/Macf1/Rpl6/Camk1/Snx1/Rpl4/Atp1a1/Grn/Rpl10a/Rpl12/Dgkz/Rps19/Arhgap32/Rpl7/Rpl18a/Pcbp1/Cfl1/Rpl38/Rpl5/Rpl30/Hnrnpa3/Hnrnpm/Chd4/Rplp0/Rpl23/Pak6/Rps27/Rps13	43
CC	GO:1905368	peptidase complex	18/724	114/13576	0.157895	2.96074	4.98968	3.17421e-05	0.000588257	0.000521006	Psmd4/Psmd2/Psmb1/Psmb6/Psmc5/Psmd12/Psmc1/Psmd6/Psmc6/Capn1/Psmd1/Psma7/Pmpcb/Psmd8/Psmc4/Sf3b3/Psmd7/Atxn7l3	18
CC	GO:0032993	protein-DNA complex	25/724	192/13576	0.130208	2.44159	4.77477	3.18592e-05	0.000588257	0.000521006	Mcm2/Ruvbl2/Vps72/Dmap1/H3f3b/Cdc5l/Parp1/Mcm7/Tead4/H1f2/Pold1/H1f4/H1f3/Hmga2/Npm1/H1f5/H2ac15/Chd4/H4c12/H4c11/H2ac20/H3c6/H3c4/H3c11/H2bc14	25
CC	GO:0005684	U2-type spliceosomal complex	16/724	97/13576	0.164948	3.09301	4.91001	5.00812e-05	0.000892826	0.000790755	Prpf6/Snrnp200/Xab2/Prpf8/Eftud2/Cdc5l/Sf3b2/Sf3b1/Snrpb/Ppie/Sf3a3/Dhx15/Snrpa1/Sf3b3/Sart1/Sf3b4	16
CC	GO:0005686	U2 snRNP	7/724	21/13576	0.333333	6.25046	5.71493	7.17603e-05	0.00123667	0.00109529	Sf3b2/Sf3b1/Snrpb/Sf3a3/Snrpa1/Sf3b3/Sf3b4	7
CC	GO:0120114	Sm-like protein family complex	14/724	80/13576	0.175	3.28149	4.85753	7.53854e-05	0.00125723	0.0011135	Prpf6/Ddx23/Snrnp200/Ddx39b/Prpf8/Eftud2/Sf3b2/Sf3b1/Snrpb/Sf3a3/Snrpa1/Sf3b3/Sart1/Sf3b4	14
CC	GO:0099572	postsynaptic specialization	40/724	401/13576	0.0997506	1.87046	4.19953	0.000100253	0.00161971	0.00143454	Hnrnpd/Abhd17a/Rpl8/Phb2/Hnrnpa2b1/Hnrnph1/Rps18/Rps25/Hspa8/Rtn4/Dbnl/Eif3e/Rps14/Eif3a/Rpl14/Macf1/Rpl6/Camk1/Snx1/Rpl4/Atp1a1/Rpl10a/Rpl12/Dgkz/Rps19/Arhgap32/Rpl7/Rpl18a/Pcbp1/Cfl1/Rpl38/Rpl5/Rpl30/Hnrnpa3/Hnrnpm/Rplp0/Rpl23/Pak6/Rps27/Rps13	40
CC	GO:0005852	eukaryotic translation initiation factor 3 complex	6/724	16/13576	0.375	7.03177	5.72966	0.000113788	0.00178268	0.00157888	Eif3e/Eif3a/Eif3i/Eif3c/Eif3k/Eif3b	6
CC	GO:0033290	eukaryotic 48S preinitiation complex	6/724	18/13576	0.333333	6.25046	5.29041	0.000240631	0.00365901	0.0032407	Eif3e/Eif3a/Eif3i/Eif3c/Eif3k/Eif3b	6
CC	GO:0016282	eukaryotic 43S preinitiation complex	6/724	19/13576	0.315789	5.92149	5.09501	0.000335928	0.00496214	0.00439485	Eif3e/Eif3a/Eif3i/Eif3c/Eif3k/Eif3b	6
CC	GO:0005689	U12-type spliceosomal complex	7/724	27/13576	0.259259	4.86147	4.76689	0.000414031	0.00594595	0.00526619	Sf3b2/Sf3b1/Snrpb/Ybx1/Dhx15/Sf3b3/Sf3b4	7
CC	GO:0070993	translation preinitiation complex	6/724	20/13576	0.3	5.62541	4.91308	0.000458411	0.00640536	0.00567308	Eif3e/Eif3a/Eif3i/Eif3c/Eif3k/Eif3b	6
CC	GO:0035770	ribonucleoprotein granule	27/724	259/13576	0.104247	1.95478	3.68216	0.000668706	0.00909792	0.00805781	Mov10/Hnrnpa2b1/Pabpc4/Hnrnpl/Nsun2/Larp4/Mcrip2/Ncl/Caprin1/Rps6/Pum1/Ybx1/Rpl6/Rps4x/Zc3h12c/Ddx1/Larp1/Ago1/Eif4g1/Pcbp1/Eif3b/Hnrnpa3/Eif4a1/Rplp0/Slc39a2/Nynrin/Rpl6l	27
CC	GO:0016363	nuclear matrix	16/724	121/13576	0.132231	2.47952	3.87995	0.000687091	0.00910836	0.00806706	Ruvbl2/Phb2/Hnrnpa2b1/Cad/Ddx39b/Stag2/Sf3b1/Sfpq/Nono/Smarca4/Xpot/Cebpa/Cfl1/Npm1/Hnrnpm/Rnasel	16
CC	GO:0005791	rough endoplasmic reticulum	9/724	47/13576	0.191489	3.59069	4.22265	0.000727797	0.00940677	0.00833136	Uba1/Rps26/Rpl6/Rpn1/Rpl4/Rps29/Rps23/Rpl18/Rpl27	9
CC	GO:0034399	nuclear periphery	18/724	149/13576	0.120805	2.26527	3.68587	0.000972234	0.0122596	0.0108581	Ruvbl2/Phb2/Hnrnpa2b1/Tpr/Cad/Ddx39b/Stag2/Sf3b1/Sfpq/Nono/Smarca4/Xpot/Cebpa/Cfl1/Npm1/Hnrnpm/Lmnb2/Rnasel	18
CC	GO:0071007	U2-type catalytic step 2 spliceosome	7/724	31/13576	0.225806	4.23418	4.27868	0.00101779	0.0125286	0.0110963	Xab2/Prpf8/Eftud2/Cdc5l/Snrpb/Ppie/Snrpa1	7
CC	GO:0005682	U5 snRNP	5/724	16/13576	0.3125	5.85981	4.6164	0.00113537	0.0136509	0.0120903	Prpf6/Ddx23/Snrnp200/Prpf8/Snrpb	5
CC	GO:0016607	nuclear speck	34/724	379/13576	0.0897098	1.68218	3.19695	0.00208357	0.0237843	0.0210652	Prpf6/Abhd17a/Timm50/Vps72/Ehmt2/Srsf6/Ddx39b/Sgk1/Prpf8/Eftud2/Acin1/Cdc5l/Epas1/Sf3b2/Smc5/Sf3b1/Api5/Ppie/Sfpq/Sf3a3/Dhx15/Srsf9/Pomp/Snrpa1/Nono/Srsf2/Apex1/Sart1/Dgkz/Prkaa1/Pcbp1/Srsf11/Npm1/Malat1	34
CC	GO:0036464	cytoplasmic ribonucleoprotein granule	24/724	239/13576	0.100418	1.88298	3.26871	0.0021567	0.0237843	0.0210652	Mov10/Hnrnpa2b1/Pabpc4/Nsun2/Larp4/Mcrip2/Ncl/Caprin1/Rps6/Pum1/Ybx1/Rpl6/Rps4x/Zc3h12c/Ddx1/Larp1/Ago1/Eif4g1/Pcbp1/Eif3b/Rplp0/Slc39a2/Nynrin/Rpl6l	24
CC	GO:0046540	U4/U6 x U5 tri-snRNP complex	7/724	35/13576	0.2	3.75028	3.86669	0.00216221	0.0237843	0.0210652	Prpf6/Ddx23/Snrnp200/Prpf8/Eftud2/Snrpb/Sart1	7
CC	GO:0097526	spliceosomal tri-snRNP complex	7/724	35/13576	0.2	3.75028	3.86669	0.00216221	0.0237843	0.0210652	Prpf6/Ddx23/Snrnp200/Prpf8/Eftud2/Snrpb/Sart1	7
CC	GO:0001650	fibrillar center	16/724	140/13576	0.114286	2.14301	3.22652	0.00321503	0.0346286	0.0306697	Ubtf/Stag2/Ncl/Gar1/Nono/Taf1c/Smarca4/Foxa1/Utp4/Arhgap32/Nop53/Leo1/Fbl/Heatr1/Eef1d/Pak6	16
CC	GO:0030904	retromer complex	5/724	20/13576	0.25	4.68785	3.9172	0.00337437	0.035603	0.0315328	Snx3/Snx5/Snx27/Snx1/Snx2	5
CC	GO:0070062	extracellular exosome	10/724	71/13576	0.140845	2.64104	3.29045	0.00422917	0.043205	0.0382656	Hnrnpa2b1/Hspa8/Nsun2/Bag6/Cd63/Sord/Ybx1/Cd9/Anpep/Bhmt	10
CC	GO:0000791	euchromatin	9/724	60/13576	0.15	2.81271	3.3399	0.004262	0.043205	0.0382656	Ruvbl2/Trim28/Pelp1/Smarca4/H1f2/H1f4/H1f3/H1f5/Bcas3	9
MF	GO:0003735	structural constituent of ribosome	64/702	163/13351	0.392638	7.46739	19.5711	1.12591e-39	8.98477e-37	8.29618e-37	Rpl13/Rps11/Rpl8/Rplp1/Rps18/Rpl10/Rps15a/Rps25/Rpl15/Rps5/Rpl19/Rps27a/Mrpl22/Mrpl36/Rps14/Rps24/Rps26/Rplp2/Rpl14/Rps3a1/Rps6/Rpl6/Mrpl19/Rps4x/Rpl4/Rpsa/Mrpl15/Rps29/Rps16/Rpl10a/Fau/Rpl12/Rps19/Rpl21/Rpl37/Rpl7/Rps2/Rpl18a/Rpl37a/Rpl27a/Rpl9/Rpl29/Rps23/Rpl38/Rpl32/Rpl23a/Rpl5/Rpl30/Rpl18/Rps12/Rpl34/Rpl17/Rpl9-ps6/Rpl7a/Rpl27/Rps15/Rpl7l1/Rplp0/Rpl23/Rpl13a/Rpl36a/Rps27/Rps13/Rpl6l	64
MF	GO:0005198	structural molecule activity	83/702	498/13351	0.166667	3.16975	11.6253	1.76271e-21	7.03322e-19	6.49421e-19	Rpl13/Rps11/Rpl8/Nid1/Tpr/Rplp1/Rps18/Rpl10/Rps15a/Rps25/Rpl15/Rps5/Rpl19/Rps27a/Dbnl/Mrpl22/Mrpl36/Rps14/Rps24/Rps26/Rplp2/Rpl14/Csrp1/Rps3a1/Tln1/Rps6/Macf1/Rpl6/Mrpl19/Mfge8/Rps4x/Rpl4/Rpsa/Mrpl15/Rps29/H1f2/Rps16/Rpl10a/Fau/Mybpc2/Rpl12/Rps19/Rpl21/Rpl37/Rpl7/Rps2/Rpl18a/Rpl37a/Rpl27a/Rpl9/Cldn4/Rpl29/Rps23/H1f4/H1f3/Rpl38/Rpl32/Rpl23a/Rpl5/Rpl30/H1f5/Rpl18/Rps12/Rpl34/Lmnb2/Rpl17/Rpl9-ps6/Rp…	83
MF	GO:0003729	mRNA binding	54/702	320/13351	0.16875	3.20938	9.42403	1.6257e-14	4.32437e-12	3.99296e-12	Hnrnpd/Nhp2/Ddx23/Supt5/Hnrnpa2b1/Tpr/Pabpc4/Rps5/Hnrnpl/Srsf6/C1qbp/Ddx39b/Cluh/Cct5/Larp4/Lrpprc/Rps14/Eif3a/Rps26/Tyms/Exosc7/Sf3b1/Ncl/Caprin1/Rps3a1/Rps6/Pum1/Ybx1/Ppie/Rpl6/Cnbp/Fus/Syncrip/Zc3h12c/Serbp1/Larp1/Eef1a1/Upf3a/Rpl7/Rps2/Eif4g1/Hnrnpa1/Pcbp1/Rpl5/Rpl30/Hnrnpa3/Hnrnpm/Hnrnpc/Xpo5/Rbm47/Rpl13a/Eif2s2/Nynrin/Rps13	54
MF	GO:0019843	rRNA binding	23/702	71/13351	0.323944	6.16093	10.2716	6.4469e-13	1.28616e-10	1.18759e-10	Rps11/Rpl8/Rps18/Rps5/Rpl19/Ncl/Rpl6/Rps4x/Rpl4/Eef2/Rpl12/Nop53/Rpl37/Rpl7/Rpl9/Npm1/Rpl23a/Rpl5/Rpl17/Rnasel/Rplp0/Rpl23/Rps13	23
MF	GO:0045182	translation regulator activity	30/702	124/13351	0.241935	4.60125	9.49107	1.09437e-12	1.74661e-10	1.61275e-10	Eif2b5/Rpl10/Rack1/Eif5/Eif3e/Eif4a2/Rps14/Eif3a/Tyms/Eef1b2/Eif3i/Cnbp/Eif3c/Eef2/Serbp1/Larp1/Eef1a1/Eif4h/Nhlrc3/Eif4g1/Pcbp1/Eif3k/Eef1d/Eif3b/Eif4b/Eif4a1/Eef1g/Eif2s2/Eif5a/Bc1	30
MF	GO:0090079	translation regulator activity, nucleic acid binding	23/702	93/13351	0.247312	4.7035	8.44299	3.02713e-10	4.02609e-08	3.71753e-08	Eif2b5/Eif5/Eif3e/Eif4a2/Eif3a/Tyms/Eef1b2/Eif3i/Eif3c/Eef2/Larp1/Eef1a1/Eif4h/Eif4g1/Pcbp1/Eif3k/Eef1d/Eif3b/Eif4b/Eif4a1/Eef1g/Eif2s2/Eif5a	23
MF	GO:0008135	translation factor activity, RNA binding	20/702	76/13351	0.263158	5.00487	8.2482	1.34439e-09	1.53261e-07	1.41515e-07	Eif2b5/Eif5/Eif3e/Eif4a2/Eif3a/Eef1b2/Eif3i/Eif3c/Eef2/Eef1a1/Eif4h/Eif4g1/Eif3k/Eef1d/Eif3b/Eif4b/Eif4a1/Eef1g/Eif2s2/Eif5a	20
MF	GO:0003743	translation initiation factor activity	14/702	49/13351	0.285714	5.43386	7.32492	1.31667e-07	1.31338e-05	1.21272e-05	Eif2b5/Eif5/Eif3e/Eif4a2/Eif3a/Eif3i/Eif3c/Eif4h/Eif4g1/Eif3k/Eif3b/Eif4b/Eif4a1/Eif2s2	14
MF	GO:0003730	mRNA 3'-UTR binding	20/702	102/13351	0.196078	3.72912	6.51797	2.81491e-07	2.49588e-05	2.3046e-05	Hnrnpd/Nhp2/Hnrnpa2b1/Pabpc4/Hnrnpl/Cct5/Larp4/Lrpprc/Exosc7/Pum1/Fus/Syncrip/Serbp1/Larp1/Hnrnpa1/Pcbp1/Rpl5/Hnrnpa3/Hnrnpc/Rbm47	20
MF	GO:0031369	translation initiation factor binding	11/702	36/13351	0.305556	5.81121	6.80952	1.40977e-06	0.000112499	0.000103877	Eif2b5/Eif5/Rps24/Rps3a1/Eif3c/Larp1/Rps19/Eif4g1/Eif3b/Eif2s2/Bc1	11
MF	GO:0051082	unfolded protein binding	15/702	80/13351	0.1875	3.56597	5.42283	1.52057e-05	0.00110311	0.00101857	Cct4/Hspa8/Cdc37/Cct5/Hsp90ab1/Cct8/Dnaja1/Dnajb6/Cct6a/Cct7/Cct2/Uggt1/Npm1/Naca/Tomm20	15
MF	GO:0048027	mRNA 5'-UTR binding	8/702	24/13351	0.333333	6.33951	6.16768	1.94614e-05	0.00129418	0.001195	Cct5/Rps14/Ncl/Rps3a1/Syncrip/Larp1/Rpl5/Rps13	8
MF	GO:0140662	ATP-dependent protein folding chaperone	8/702	29/13351	0.275862	5.24649	5.39294	8.98665e-05	0.00543931	0.00502245	Cct4/Hspa8/Cct5/Hsp90ab1/Cct8/Cct6a/Cct7/Cct2	8
MF	GO:0016887	ATP hydrolysis activity	36/702	351/13351	0.102564	1.95062	4.25176	9.54265e-05	0.00543931	0.00502245	Mov10/Mcm2/Snrnp200/Ruvbl2/Cct4/Dqx1/Abca1/Hspa8/Cdc6/Ddx39b/Smpdl3a/Psmc5/Psmc1/Psmc6/Cct5/Nubp1/Eif4a2/Hsp90ab1/Msh2/Smc5/Cct8/Macf1/Dhx15/Cct6a/Mcm7/Cct7/Psmc4/Smarca4/Atp1a1/Cct2/Ddx1/Abce1/Eif4a1/Atp8b2/Chd4/Rnf213	36
MF	GO:0003746	translation elongation factor activity	6/702	16/13351	0.375	7.13194	5.78153	0.000105168	0.00559492	0.00516613	Eef1b2/Eef2/Eef1a1/Eef1d/Eef1g/Eif5a	6
MF	GO:0031491	nucleosome binding	10/702	52/13351	0.192308	3.65741	4.52305	0.000321394	0.0160295	0.014801	Supt6/H3f3b/Pwwp3a/Parp1/H1f2/Mllt6/H1f4/H1f3/Hmga2/H1f5	10
MF	GO:0008097	5S rRNA binding	5/702	13/13351	0.384615	7.31481	5.36621	0.000358031	0.0168064	0.0155184	Rpl4/Eef2/Nop53/Rpl7/Rpl5	5
MF	GO:0042826	histone deacetylase binding	16/702	117/13351	0.136752	2.60082	4.09705	0.000402928	0.017056	0.0157489	Hnrnpd/Smg5/Mef2d/Ywhab/Ywhae/Hsp90ab1/Parp1/Zbtb7b/Hdac1/Sfpq/Jdp2/Cebpa/H1f4/Mta3/H1f5/Chd4	16
MF	GO:0031492	nucleosomal DNA binding	6/702	20/13351	0.3	5.70556	4.96107	0.000424804	0.017056	0.0157489	H3f3b/H1f2/H1f4/H1f3/Hmga2/H1f5	6
MF	GO:0046982	protein heterodimerization activity	26/702	242/13351	0.107438	2.04331	3.8585	0.000427469	0.017056	0.0157489	Mef2d/Itga3/Supt5/Phb2/Bud23/Ywhae/Nr4a1/Tfeb/Epas1/Mapk4/Hexa/Atf6/Gca/Rragd/Ran/Tpm4/Snx1/Atp1a1/Jdp2/Snx2/Cebpa/Hip1/Tenm2/H2ac15/H2ac20/H2bc14	26
MF	GO:0043021	ribonucleoprotein complex binding	21/702	182/13351	0.115385	2.19444	3.82214	0.000586646	0.0222925	0.0205841	Prpf6/Timm50/Rplp1/C1qbp/Rack1/Bag6/Rplp2/Snrpb/Eif3c/Rpsa/Eef2/Serbp1/Larp1/Eif3k/Npm1/Abce1/Hnrnpc/Rnasel/Xpo5/Eif5a/Xist	21
MF	GO:0001046	core promoter sequence-specific DNA binding	8/702	41/13351	0.195122	3.71093	4.09546	0.00114423	0.0415043	0.0383235	Ruvbl2/H3f3b/Ubtf/Pax6/Hdac1/Taf1c/Ago1/Npm1	8
MF	GO:1990948	ubiquitin ligase inhibitor activity	4/702	10/13351	0.4	7.60741	4.924	0.00123348	0.0427964	0.0395165	Rpl37/Rpl5/Rps15/Rpl23	4

## Sheet: 8cWT_2cWT__8cKO_2cKO_down_enrGO
Figure 1–figure supplement 3–Source Data 1. Overrepresentation Analysis (ORA) against Gene Ontology (GO) Analysis by DEG Venn Compartment. GO enrichment for DEG subsets defined by intersecting Venn diagram compartments (Fig. 1E–F). The analysis was run using function enrichGO from R package ClusterProfiler (v4.14.4). Results are shown only for sets with significant enrichment.
ONTOLOGY	ID	Description	GeneRatio	BgRatio	RichFactor	FoldEnrichment	zScore	pvalue	p.adjust	qvalue	geneID	Count
BP	GO:0009952	anterior/posterior pattern specification	37/1421	159/13469	0.232704	2.2057	5.25217	2.63807e-06	0.0134093	0.0127183	Scmh1/Axin2/Tulp3/Shh/Apc/Tgfbr1/Hipk1/Dll1/Hnf1b/Ets2/Lrp5/Hhex/Tdrd1/Sox17/Epb41l5/Bmi1/Nckap1/Mllt3/Hes2/Ctnnbip1/Lrp6/Smad3/Gbx2/Prickle1/Hoxa7/Tdrd6/Ofd1/Tdrkh/Pld6/Fzd5/Dmrt2/Gli2/Hipk2/Hes6/Bmpr2/Celsr2/Nrarp	37
MF	GO:0005543	phospholipid binding	69/1418	392/13351	0.17602	1.6573	4.55327	1.56368e-05	0.0106186	0.0103482	Tulp3/Snx9/Tiam1/Plekha3/Pacsin2/Osbpl8/Nf1/Gga3/Iqgap2/Laptm4b/Myo10/Asap1/Deptor/Snx15/Apba1/Gbf1/Pard3/Cps1/Plekhb2/Pld1/Pfn2/Dapp1/Unc13b/Slc9a1/Cptp/Rph3a/Gsdme/Itpr1/Plekha5/C2cd5/Sytl2/Fchsd2/Sytl4/Smpd3/Tirap/Apoa5/Rasa2/Nlrp3/Mtss2/Pla2g4c/Zfyve9/Rubcnl/Dennd1a/Slc9a3/Eea1/Phf12/Arap2/Sbf2/Mapkap1/Zcchc2/Pacsin1/Appl1/Clvs1/Aida/Pla2g4f/Amer1/Map1b/Sh3pxd2a/Gsdmc3/Kcnh1/Zcchc14/Pclo/Unc1…	69
MF	GO:0001216	DNA-binding transcription activator activity	68/1418	391/13351	0.173913	1.63746	4.41002	2.68547e-05	0.0106186	0.0103482	Lhx2/Foxj2/Plag1/Fosb/Nfat5/Etv1/Mlxipl/Rfx5/Pou2f2/Ubp1/Myt1/Ehf/E2f4/Gata2/Arnt2/Irf1/Nr2e1/Esr2/Hif1a/Gcm2/Osr2/Ppara/Trp63/Hsf1/Dlx2/Hhex/Bnc1/Sox17/Mybl1/Tfap2b/Elk4/Tbx19/Esrrg/Atf2/Meis2/E2f5/Creb3l4/Pitx2/Fosl2/Clock/Nobox/Nr2e3/Smad3/Foxj3/Gbx2/Thap11/Elf1/Rfxap/Hoxa7/Egr1/Creb3l2/Runx2/Prrx2/Erg/Foxo1/Neurog3/Csrnp3/Atmin/Dmrt2/Kmt2d/Pou4f1/Gli2/Glis3/Zfp735/Zfp27/Stat4/Nr6a1/Mafb	68
MF	GO:0008146	sulfotransferase activity	12/1418	31/13351	0.387097	3.64466	5.08163	4.03431e-05	0.0106186	0.0103482	Chst1/Chst5/Chst12/Chst7/Hs3st6/Hs2st1/Hs3st5/Ust/Chst8/Gal3st2c/Sult2a4/Gal3st2	12
MF	GO:0001228	DNA-binding transcription activator activity, RNA polymerase II-specific	66/1418	383/13351	0.172324	1.62249	4.2609	4.70371e-05	0.0106186	0.0103482	Lhx2/Foxj2/Plag1/Fosb/Nfat5/Etv1/Mlxipl/Rfx5/Pou2f2/Ubp1/Myt1/Ehf/E2f4/Gata2/Arnt2/Irf1/Nr2e1/Esr2/Hif1a/Gcm2/Osr2/Ppara/Trp63/Hsf1/Dlx2/Hhex/Sox17/Mybl1/Tfap2b/Elk4/Tbx19/Esrrg/Atf2/Meis2/Creb3l4/Pitx2/Fosl2/Clock/Nobox/Nr2e3/Smad3/Foxj3/Gbx2/Thap11/Elf1/Rfxap/Hoxa7/Egr1/Creb3l2/Runx2/Prrx2/Erg/Foxo1/Neurog3/Csrnp3/Atmin/Dmrt2/Kmt2d/Pou4f1/Gli2/Glis3/Zfp735/Zfp27/Stat4/Nr6a1/Mafb	66
MF	GO:0061630	ubiquitin protein ligase activity	53/1418	298/13351	0.177852	1.67455	4.05946	0.000111799	0.0190978	0.0186113	Uhrf1/Dtx2/Rnf170/Smurf2/Gid4/Tmem129/Mdm2/Jade2/Rnf185/Hecw1/Marchf5/Uhrf2/Arih1/Ube3a/Trim44/Bspry/Ube4b/Ube2k/Rchy1/Brap/Cul1/Herc2/Rbbp6/Trim30a/D7Ertd443e/Rnf128/Sh3rf1/Mycbp2/Trim59/Rfpl4/G2e3/Pdzrn3/Trim3/Sh3rf3/Rnf146/Lonrf1/Dtx4/Trim41/Siah1b/Cop1/Trim62/Wwp1/Fbxo2/Neurl3/Fbxo40/Trim60/Sh3rf2/Rnf14/Dzip3/Msl2/Trim75/Ube2d2a/Trim61	53
MF	GO:0061659	ubiquitin-like protein ligase activity	55/1418	314/13351	0.175159	1.64919	4.01284	0.000126896	0.0190978	0.0186113	Uhrf1/Dtx2/Rnf170/Smurf2/Gid4/Tmem129/Mdm2/Jade2/Rnf185/Hecw1/Marchf5/Uhrf2/Arih1/Ube3a/Trim44/Bspry/Ube4b/Ube2k/Rchy1/Brap/Cul1/Herc2/Rbbp6/Trim30a/D7Ertd443e/Rnf128/Sh3rf1/Pias1/Mycbp2/Trim59/Rfpl4/G2e3/Pdzrn3/Trim3/Sh3rf3/Atg5/Rnf146/Lonrf1/Dtx4/Trim41/Siah1b/Cop1/Trim62/Wwp1/Fbxo2/Neurl3/Fbxo40/Trim60/Sh3rf2/Rnf14/Dzip3/Msl2/Trim75/Ube2d2a/Trim61	55
MF	GO:0035091	phosphatidylinositol binding	45/1418	248/13351	0.181452	1.70843	3.8819	0.000225229	0.0290545	0.0283145	Tulp3/Snx9/Plekha3/Osbpl8/Gga3/Iqgap2/Laptm4b/Myo10/Asap1/Snx15/Apba1/Gbf1/Pard3/Plekhb2/Pld1/Pfn2/Dapp1/Rph3a/Gsdme/Itpr1/Plekha5/Sytl2/Fchsd2/Tirap/Nlrp3/Mtss2/Zfyve9/Rubcnl/Dennd1a/Slc9a3/Eea1/Phf12/Arap2/Sbf2/Mapkap1/Zcchc2/Appl1/Clvs1/Aida/Amer1/Sh3pxd2a/Gsdmc3/Kcnh1/Zcchc14/Arfip1	45

## Sheet: 8cKO_2cKO_down_enrGO
Figure 1–figure supplement 3–Source Data 1. Overrepresentation Analysis (ORA) against Gene Ontology (GO) Analysis by DEG Venn Compartment. GO enrichment for DEG subsets defined by intersecting Venn diagram compartments (Fig. 1E–F). The analysis was run using function enrichGO from R package ClusterProfiler (v4.14.4). Results are shown only for sets with significant enrichment.
ONTOLOGY	ID	Description	GeneRatio	BgRatio	RichFactor	FoldEnrichment	zScore	pvalue	p.adjust	qvalue	geneID	Count
BP	GO:0007389	pattern specification process	80/1918	346/13469	0.231214	1.62368	4.78906	5.00278e-06	0.0128637	0.0120241	Tbx2/Irx2/Hoxd13/Rab23/Crkl/Chrd/Bmp7/Map3k4/Wnt11/Mfng/Dnah11/Lhx1/Hey2/Psen1/Btg2/Tmem107/Gsc/Asb2/Barx1/Ror2/Smad5/Wnt7b/Arc/Rttn/Axin1/Sufu/Nrp1/Eya1/Hoxd8/Notch2/Lef1/Asph/Rnf220/Stil/Ski/Lfng/Bhlhe40/Bhlhe41/Ift122/Dbx1/Irx3/Adgrg1/Eomes/Rpgrip1l/Foxj1/Pbx2/Sema3f/Tbr1/Tdrd7/Meox2/Pcdh8/Alx1/Dchs1/Spry1/Acd/Tbc1d32/Mical2/Hoxb4/Cited2/Hey1/Foxn4/Snai1/Helt/Msx1/Tmem67/Six1/Bmpr1b/Pbx1/Gas1/…	80
BP	GO:0043583	ear development	51/1918	194/13469	0.262887	1.8461	4.83695	6.61482e-06	0.0128637	0.0120241	Tbx2/Naglu/Rac1/Nfix/Dvl3/Fzd3/Prox1/Abr/Hey2/Gsc/Ror2/Atp8a2/Col2a1/Ttc39c/Rdh10/Eya1/Jag1/Bcl2l11/Calb1/Kcnq4/Ephb2/Slc26a5/Rest/Lrig1/Bmper/Triobp/Rpgrip1l/Ror1/Ptprq/Dchs1/C1qb/Enpp1/Kcnk2/H2-DMa/Hey1/Hesx1/Insig1/Gjb2/Msx1/Six1/Pcdh15/Gas1/Adam10/Ankrd24/Ece1/Mapk3/Alms1/Adgrv1/Cebpd/Sox2/Otogl	51
BP	GO:0090596	sensory organ morphogenesis	59/1918	236/13469	0.25	1.7556	4.77186	7.22813e-06	0.0128637	0.0120241	Tbx2/Naglu/Rac1/Dvl3/Stat3/Epha2/Fzd3/Bmp7/Prox1/Abr/Lhx1/Ahi1/Gsc/Ror2/Atp8a2/Col2a1/Ttc39c/Fbn2/Rp1/Eya1/Cfh/Pou2f1/Jag1/Notch2/Calb1/Kcnq4/Ephb2/Ski/Prom1/Rest/Lrig1/Ift122/Thy1/Vsx1/Triobp/Rpgrip1l/Impg2/Tdrd7/Ptprq/Enpp1/Cited2/Hesx1/Foxn4/Insig1/Msx1/Dscam/Six1/Pcdh15/Gas1/Ankrd24/Ntrk2/Mapk3/Sox11/Alms1/Phactr4/Fat1/Sox2/Dio3/Sox4	59
BP	GO:0003002	regionalization	72/1918	310/13469	0.232258	1.63101	4.58009	1.24625e-05	0.0130003	0.0121518	Tbx2/Irx2/Hoxd13/Rab23/Crkl/Chrd/Map3k4/Wnt11/Dnah11/Lhx1/Hey2/Psen1/Btg2/Tmem107/Gsc/Asb2/Barx1/Ror2/Wnt7b/Arc/Rttn/Axin1/Sufu/Nrp1/Hoxd8/Notch2/Lef1/Rnf220/Stil/Ski/Lfng/Bhlhe40/Bhlhe41/Ift122/Dbx1/Irx3/Adgrg1/Eomes/Rpgrip1l/Foxj1/Pbx2/Sema3f/Tbr1/Tdrd7/Meox2/Pcdh8/Alx1/Spry1/Acd/Tbc1d32/Mical2/Hoxb4/Cited2/Hey1/Foxn4/Snai1/Helt/Msx1/Tmem67/Six1/Bmpr1b/Pbx1/Gas1/Daw1/Dand5/Tcf7l1/Abi1/Irx1/Ext1…	72
BP	GO:0048593	camera-type eye morphogenesis	35/1918	119/13469	0.294118	2.06542	4.75684	1.39458e-05	0.0130003	0.0121518	Tbx2/Naglu/Stat3/Epha2/Bmp7/Prox1/Lhx1/Ahi1/Atp8a2/Rp1/Cfh/Pou2f1/Jag1/Notch2/Calb1/Ephb2/Ski/Prom1/Ift122/Thy1/Vsx1/Rpgrip1l/Impg2/Tdrd7/Cited2/Foxn4/Dscam/Ntrk2/Sox11/Alms1/Phactr4/Fat1/Sox2/Dio3/Sox4	35
BP	GO:0097485	neuron projection guidance	50/1918	194/13469	0.257732	1.8099	4.63001	1.46098e-05	0.0130003	0.0121518	Rac1/Lamb1/Efnb3/Fzd3/Bmp7/Etv4/Lhx1/Lama2/Cyfip2/Sema4d/Trio/Matn2/Wnt7b/Pla2g10/Myot/Nrp1/Klf7/Lmx1a/Efna3/Ntrk1/Lmo4/Ephb2/Cdk5/Plxna4/Ephb6/Plxna1/Ptpro/Slit2/Neo1/Sema3f/Tbr1/Notch3/Cntn5/Dag1/Sema3d/Tubb2b/Flrt2/Bcl11b/Lgr4/Dscam/B3gnt2/Bmpr1b/Gas1/Ece1/Cxcl12/Ext1/Tubb3/Sema3e/Kif5a/Ntn3	50
BP	GO:0007186	G protein-coupled receptor signaling pathway	85/1918	388/13469	0.219072	1.53842	4.3851	2.29382e-05	0.0161273	0.0150747	Grm6/Akt1/Rac1/Insr/Crkl/Fzd3/Git1/Ada/Ccl6/Esr1/Grm1/Itgb3/Rph3al/Anxa7/Adcy8/Cxcl13/Prkd3/Grm8/Gabbr1/Gnal/Anxa1/Rela/Tac2/Inpp5a/Prkar1b/Rgs2/Abl1/Gnas/Car2/Ntsr1/Src/Gnb4/Cort/Gnb1/Adgra3/Nmu/Nos1/Tmem116/Gnb2/Adcyap1r1/Slit2/Adcy7/Adgrg1/Lpar2/Gnb5/Gnai2/Adgre4/Rpgrip1l/Ccr3/Npffr2/Adgrl3/Kcnk2/Pcsk1n/Uts2r/Prex1/Chrm4/Cmklr1/Gpr153/Gpr149/Npsr1/Muc19/Hcrt/Chrm3/Wbp1l/Rbm15/Agtr1a/Ubqln2/Lgr…	85
BP	GO:0002009	morphogenesis of an epithelium	98/1918	464/13469	0.211207	1.48318	4.316	2.70102e-05	0.0161273	0.0150747	Tbx2/Tbx4/Luzp1/Tmem79/Irx2/Naglu/Hoxd13/Klf4/Rab23/Wdr1/Igf1r/Epha2/Fzd3/Rala/Bmp7/Prox1/Etv5/Wnt11/Sulf1/Etv4/Lhx1/Esr1/Psen1/Ahi1/Krt12/Asb2/Angpt1/Mtss1/Wnt7b/Pla2g10/Nr3c1/Sufu/Nrp1/Rdh10/Eya1/Casp8/Kif26b/Abl1/Jag1/Car2/Src/Notch2/Lef1/Lmo4/Car9/Stil/Ski/Pdx1/Plxna1/Ift122/Pak1/Ophn1/Col4a1/Slit2/Irx3/Plet1/Phldb2/Rpgrip1l/Ppp3r1/Pcdh8/Alx1/Dchs1/Spry1/Clic4/Enpp1/Fermt2/Rara/Opa1/Mical2/Ho…	98
BP	GO:0007411	axon guidance	49/1918	193/13469	0.253886	1.78289	4.4639	2.7186e-05	0.0161273	0.0150747	Rac1/Lamb1/Efnb3/Fzd3/Bmp7/Etv4/Lhx1/Lama2/Cyfip2/Sema4d/Trio/Matn2/Wnt7b/Pla2g10/Myot/Nrp1/Klf7/Lmx1a/Efna3/Ntrk1/Lmo4/Ephb2/Cdk5/Plxna4/Ephb6/Ptpro/Slit2/Neo1/Sema3f/Tbr1/Notch3/Cntn5/Dag1/Sema3d/Tubb2b/Flrt2/Bcl11b/Lgr4/Dscam/B3gnt2/Bmpr1b/Gas1/Ece1/Cxcl12/Ext1/Tubb3/Sema3e/Kif5a/Ntn3	49
BP	GO:0034764	positive regulation of transmembrane transport	42/1918	158/13469	0.265823	1.86672	4.46547	3.14579e-05	0.0167364	0.0156441	Grm6/Calm1/Akt1/Sri/Cacnb3/Gstm7/Akt2/Insr/Clip3/Cnksr3/Psen1/Arc/Pdpk1/Sorbs1/Capn10/Abl1/Lrrc26/Car2/Ntsr1/Asph/Ephb2/Nos1/Adcyap1r1/Klf15/Adipor2/Cd19/Atp2a1/G6pdx/Ikbkb/Trpc6/Thy1/Ank2/Ppp3r1/Wnk2/Kcne1/Stac3/Cftr/Npsr1/Agtr1a/Amigo1/Repin1/Akap6	42
BP	GO:0003007	heart morphogenesis	54/1918	221/13469	0.244344	1.71589	4.37251	3.44823e-05	0.0167364	0.0156441	Tbx2/Naglu/Rac1/Dvl3/Insr/Crkl/Fgfrl1/Bmp7/Prox1/Wnt11/Dnah11/Hey2/Psen1/Asb2/Zfpm2/Angpt1/Has2/Col2a1/Emp2/Sufu/Nrp1/Smad7/Eya1/Olfm1/Jag1/Shox2/Notch2/Stil/Parva/Adprhl1/Slit2/Egln1/Arid2/Dchs1/Spry1/Cpe/Mical2/Synpo2l/Cited2/Dag1/Hey1/Pkp2/Foxn4/Snai1/Flrt2/Rbm15/Msx1/Six1/Gsk3a/Ext1/Sox11/Dhrs3/Gng5/Sox4	54
BP	GO:0045785	positive regulation of cell adhesion	82/1918	377/13469	0.217507	1.52742	4.23246	4.15595e-05	0.0184905	0.0172836	Tfe3/Rac1/Lamb1/Cd36/Efnb3/Il12b/Crkl/Chrd/Bmp7/Cd274/Ada/Cyth3/Lama2/Kitl/Itgb3/Carmil1/Olfm4/Dab2/Angpt1/Has2/Emp2/Bcl6/Klhl22/Cxcl13/Smoc2/H2-Oa/Megf10/Cd74/Anxa1/Efemp2/Rela/Adam8/Nrp1/Smad7/Kif26b/Spta1/Selp/Il2ra/Abl1/Frmd5/Src/Lef1/Epb41l4b/Jak1/Dmp1/Ephb6/Plekha2/Adgrg1/Thy1/Triobp/Arid2/Chst2/Bag4/H2-DMa/Fermt2/Rara/Socs1/Opa1/Igfbp2/Prex1/Cited2/Dag1/Col16a1/Slc7a1/Pkp2/Disc1/Ecm2/Shb/I…	82
BP	GO:0007600	sensory perception	69/1918	305/13469	0.22623	1.58868	4.23741	4.60638e-05	0.018918	0.0176833	Grm6/Cd36/Cacnb3/Cacna1e/Grap/Wdr1/Cnga2/Grm1/Atp8a2/Col2a1/Axin1/Grm8/Gnal/Cabp2/Rp1/Rdh10/Serpine2/Cfh/Gnas/Fabp5/Ntsr1/Lef1/Ntrk1/Kcnq4/Espn/Cdk5/Slc26a5/Gnb1/Nmu/Rest/Lrig1/Cnga4/Bbs2/Trpa1/Vsx1/Triobp/Gjc1/Myo5a/Impg2/Ror1/Reep6/Ptprq/Enpp1/Kcnk2/Opa1/Cntn5/Usp53/Dmxl2/Tmc7/Disc1/Gjb2/Kcna1/Ptges/Nyx/Six1/B3gnt2/Nlgn2/Dlg2/Pcdh15/Ankrd24/Tmc2/Cxcl12/Mapk3/Alms1/Rdh11/Adgrv1/Sox2/Scn9a/Otogl	69
BP	GO:0050974	detection of mechanical stimulus involved in sensory perception	15/1918	36/13469	0.416667	2.92601	4.71508	5.48056e-05	0.0204262	0.019093	Cacnb3/Grm8/Serpine2/Ntrk1/Rest/Trpa1/Ptprq/Kcnk2/Kcna1/Pcdh15/Tmc2/Cxcl12/Adgrv1/Sox2/Scn9a	15
BP	GO:0007218	neuropeptide signaling pathway	12/1918	25/13469	0.48	3.37076	4.83459	5.73878e-05	0.0204262	0.019093	Rela/Tac2/Ntsr1/Cort/Nmu/Npffr2/Pcsk1n/Uts2r/Gpr149/Npsr1/Hcrt/Rapgef2	12
BP	GO:0043270	positive regulation of monoatomic ion transport	38/1918	143/13469	0.265734	1.8661	4.24278	7.40117e-05	0.0215446	0.0201384	Grm6/Calm1/Akt1/Sri/Cacnb3/Gstm7/Akt2/Cnksr3/Trpv2/Arc/Pdpk1/Abl1/Lrrc26/Gnas/Ntsr1/Asph/Ephb2/Nos1/Adcyap1r1/Cd19/Atp2a1/G6pdx/Ikbkb/Trpc6/Thy1/Trpa1/Ank2/Ppp3r1/Wnk2/Kcne1/Stac3/Cftr/Npsr1/Hcrt/Agtr1a/Amigo1/Cxcl12/Akap6	38
BP	GO:0048839	inner ear development	43/1918	169/13469	0.254438	1.78677	4.19403	7.79662e-05	0.0215446	0.0201384	Tbx2/Naglu/Rac1/Dvl3/Fzd3/Prox1/Abr/Hey2/Ror2/Atp8a2/Col2a1/Ttc39c/Eya1/Jag1/Calb1/Kcnq4/Ephb2/Slc26a5/Rest/Lrig1/Bmper/Triobp/Rpgrip1l/Ror1/Ptprq/Dchs1/C1qb/Kcnk2/H2-DMa/Hey1/Hesx1/Insig1/Gjb2/Msx1/Six1/Pcdh15/Adam10/Ankrd24/Alms1/Adgrv1/Cebpd/Sox2/Otogl	43
BP	GO:0007409	axonogenesis	84/1918	396/13469	0.212121	1.4896	4.02968	8.5179e-05	0.0215446	0.0201384	Rac1/Nfix/Metrn/Lamb1/Efnb3/Crabp2/Map2k1/Igf1r/Fzd3/Bmp7/Map2/Xk/Top2b/Etv4/Trpv2/Lhx1/Lama2/Psen1/Cyfip2/Numb/Sema4d/Atp8a2/Trio/Matn2/Wnt7b/Pla2g10/Myot/Nrp1/Klf7/Stk25/Actr3/Lmx1a/Olfm1/Abl1/Shox2/Efna3/Ntrk1/Lmo4/Dab1/Ephb2/Cdk5/Uchl1/Plxna4/Ephb6/Plxna1/Ptpro/Pak1/Gla/Plxnb3/Slit2/Thy1/Neo1/Sema3f/Tbr1/Kifbp/Notch3/Golga4/Cntn5/Dag1/Sema3d/Trpc5/Sipa1l1/Disc1/Tubb2b/Flrt2/Bcl11b/Lgr4/Dscam/…	84
BP	GO:0034767	positive regulation of monoatomic ion transmembrane transport	31/1918	109/13469	0.284404	1.9972	4.2595	8.54856e-05	0.0215446	0.0201384	Grm6/Calm1/Sri/Cacnb3/Gstm7/Cnksr3/Arc/Pdpk1/Abl1/Lrrc26/Ntsr1/Asph/Ephb2/Nos1/Adcyap1r1/Cd19/Atp2a1/G6pdx/Ikbkb/Trpc6/Thy1/Ank2/Ppp3r1/Wnk2/Kcne1/Stac3/Cftr/Npsr1/Agtr1a/Amigo1/Akap6	31
BP	GO:0060042	retina morphogenesis in camera-type eye	20/1918	58/13469	0.344828	2.42152	4.42083	8.59373e-05	0.0215446	0.0201384	Naglu/Stat3/Prox1/Lhx1/Ahi1/Atp8a2/Rp1/Cfh/Calb1/Prom1/Thy1/Vsx1/Rpgrip1l/Impg2/Foxn4/Dscam/Ntrk2/Alms1/Sox2/Dio3	20
BP	GO:1904427	positive regulation of calcium ion transmembrane transport	20/1918	58/13469	0.344828	2.42152	4.42083	8.59373e-05	0.0215446	0.0201384	Grm6/Calm1/Sri/Cacnb3/Gstm7/Pdpk1/Abl1/Ntsr1/Asph/Adcyap1r1/Cd19/Atp2a1/G6pdx/Thy1/Ank2/Ppp3r1/Stac3/Npsr1/Agtr1a/Akap6	20
BP	GO:0060411	cardiac septum morphogenesis	22/1918	67/13469	0.328358	2.30587	4.36635	8.98526e-05	0.0215446	0.0201384	Tbx2/Dvl3/Fgfrl1/Bmp7/Prox1/Wnt11/Dnah11/Hey2/Zfpm2/Nrp1/Smad7/Jag1/Notch2/Parva/Slit2/Egln1/Cited2/Hey1/Rbm15/Sox11/Dhrs3/Sox4	22
BP	GO:0060219	camera-type eye photoreceptor cell differentiation	12/1918	26/13469	0.461538	3.24112	4.66089	9.28127e-05	0.0215446	0.0201384	Naglu/Stat3/Ahi1/Rp1/Cfh/Prom1/Thy1/Rpgrip1l/Dscam/Ntrk2/Alms1/Dio3	12
BP	GO:0043010	camera-type eye development	67/1918	301/13469	0.222591	1.56313	4.02622	9.91688e-05	0.0220609	0.020621	Tbx2/Grm6/Serpinf1/Naglu/Nfix/Klf4/Stat3/Rcn1/Epha2/Bmp7/Prox1/Mertk/Lhx1/Psen1/Ahi1/Limk2/Arsg/Krt12/Atp8a2/Myom1/Fbn2/Nrp1/Rp1/Rdh10/Cfh/Pou2f1/Jag1/Slc7a11/Notch2/Calb1/Ephb2/Ski/Gnb1/Prom1/Foxp2/Ift122/Col4a1/Thy1/Vsx1/Hsf4/Rpgrip1l/Impg2/Tdrd7/Spry1/Clic4/Rara/Tbc1d32/Nphp4/Cited2/Hesx1/Foxn4/Bcl11b/Dscam/Bmpr1b/Gas1/Elp6/Ntrk2/Mab21l2/Max/Nhs/Sox11/Alms1/Phactr4/Fat1/Sox2/Dio3/Sox4	67
BP	GO:0043584	nose development	8/1918	13/13469	0.615385	4.32149	4.88217	0.000109799	0.0234487	0.0219182	Rdh10/Pou2f1/Ski/Rpgrip1l/Hesx1/Msx1/Six1/Sox2	8
BP	GO:0048568	embryonic organ development	86/1918	411/13469	0.209246	1.46941	3.93824	0.000116051	0.0238307	0.0222753	Tbx2/Tbx4/Akt1/Naglu/Rac1/Dvl3/Map2k1/Epha2/Chrd/Fzd3/Bmp7/Prox1/Wnt11/Abr/Ada/Lhx1/Hey2/Kitl/Psen1/Gsc/Asb2/Ror2/Atp8a2/Zfpm2/Wnt7b/Col2a1/Axin1/Ttc39c/Pcdh12/Mbd2/Fbn2/Men1/Sufu/Tnrc6c/Plk4/Rdh10/Eya1/Gnas/Shox2/Notch2/Lef1/Kcnq4/Ephb2/Stil/Rest/Plxna4/Lrig1/Ift122/Egln1/Rbpms2/Eomes/Triobp/Arid2/Pbx2/Epn1/Ptprq/Alx1/Enpp1/Rara/Mical2/Hoxb4/Pbx3/Tex19.1/Cited2/Hey1/Hesx1/Foxn4/Snai1/Tubb2b/Insi…	86
BP	GO:0008045	motor neuron axon guidance	11/1918	23/13469	0.478261	3.35855	4.61294	0.000122548	0.0242326	0.022651	Rac1/Etv4/Lhx1/Nrp1/Lmo4/Cdk5/Plxna4/Slit2/Sema3f/Cxcl12/Ntn3	11
BP	GO:0048562	embryonic organ morphogenesis	55/1918	238/13469	0.231092	1.62283	3.95027	0.000146297	0.0278957	0.026075	Tbx2/Naglu/Rac1/Dvl3/Epha2/Fzd3/Bmp7/Prox1/Wnt11/Abr/Lhx1/Psen1/Gsc/Asb2/Ror2/Atp8a2/Col2a1/Axin1/Ttc39c/Fbn2/Men1/Sufu/Rdh10/Eya1/Gnas/Shox2/Notch2/Kcnq4/Ephb2/Stil/Rest/Lrig1/Ift122/Rbpms2/Triobp/Ptprq/Alx1/Enpp1/Mical2/Hoxb4/Cited2/Hesx1/Foxn4/Insig1/Msx1/Six1/Pcdh15/Gas1/Ankrd24/T2/Mapk3/Sox11/Phactr4/Sox2/Hoxb2	55
BP	GO:0007169	cell surface receptor protein tyrosine kinase signaling pathway	99/1918	491/13469	0.201629	1.41593	3.82577	0.000159781	0.0294162	0.0274962	Tbx2/Akt1/Rac1/Efnb3/Stat3/Akt2/Il12b/Map2k1/Igf1r/Insr/Insrr/Crkl/Epha2/Chrd/Fgfrl1/Rala/Git1/Mertk/Yes1/Sulf1/Myo1c/Esr1/Wasf1/Psen1/Ahi1/Shc2/Cyfip2/Myocd/Itgb3/Rhbdf2/Gpld1/Ror2/Efs/Angpt1/Nus1/Smoc2/Pdpk1/Ppp2r5b/Rela/Sorbs1/Vwa2/Nrp1/Vil1/Abl1/Creb3l1/Ltk/Ptpn1/Src/Ift80/Efna3/Ntrk1/Jak1/Ephb2/Ephb6/Pak1/Col4a1/Adgrg1/Cep57/Ubash3b/Phip/Nptn/Fam83b/Gnai2/Ccdc88a/Adgre4/Ror1/Sh3glb1/Spry1/En…	99
BP	GO:0048592	eye morphogenesis	37/1918	143/13469	0.258741	1.81699	4.00222	0.000165832	0.0295125	0.0275862	Tbx2/Naglu/Stat3/Epha2/Bmp7/Prox1/Lhx1/Ahi1/Atp8a2/Fbn2/Rp1/Cfh/Pou2f1/Jag1/Notch2/Calb1/Ephb2/Ski/Prom1/Ift122/Thy1/Vsx1/Rpgrip1l/Impg2/Tdrd7/Cited2/Foxn4/Dscam/Gas1/Ntrk2/Sox11/Alms1/Phactr4/Fat1/Sox2/Dio3/Sox4	37
BP	GO:0051928	positive regulation of calcium ion transport	24/1918	79/13469	0.303797	2.13339	4.1169	0.000173602	0.0298987	0.0279472	Grm6/Calm1/Sri/Cacnb3/Gstm7/Trpv2/Pdpk1/Abl1/Ntsr1/Asph/Adcyap1r1/Cd19/Atp2a1/G6pdx/Trpc6/Thy1/Ank2/Ppp3r1/Stac3/Npsr1/Hcrt/Agtr1a/Cxcl12/Akap6	24
BP	GO:0009612	response to mechanical stimulus	41/1918	166/13469	0.246988	1.73445	3.8798	0.000226126	0.037016	0.0346	Akt1/Rac1/Cacnb3/Wnt11/Btg2/Itgb3/Atp8a2/Scel/Grm8/Mbd2/Rela/Serpine2/Src/Postn/Ntrk1/Calb1/Slc2a1/AU040320/Slc26a5/Rest/Nos1/Foxp2/Mtpn/Ptgs2/Myd88/Trpa1/Ptprq/Kcnk2/Txnip/Igfbp2/Usp53/Cited2/Dag1/Kcna1/Pcdh15/Tmc2/Cxcl12/Mapk3/Adgrv1/Sox2/Scn9a	41
BP	GO:0046548	retinal rod cell development	7/1918	11/13469	0.636364	4.46881	4.68978	0.000228793	0.037016	0.0346	Naglu/Ahi1/Rp1/Cfh/Rpgrip1l/Ntrk2/Alms1	7
BP	GO:0048736	appendage development	42/1918	173/13469	0.242775	1.70486	3.8022	0.000284055	0.0414732	0.0387663	Tbx2/Tbx4/Naglu/Hoxd13/Rab23/Crabp2/Bmp7/Sulf1/Psen1/Tmem107/Ror2/Col2a1/Fbn2/Rdh10/Bcl2l11/Gnas/Slc7a11/Ift80/Shox2/Notch2/Lef1/Asph/Ski/Ift122/Rpgrip1l/Pbx2/Meox2/Alx1/Aff3/Bbs7/Enpp1/Fermt2/Rara/Acd/Tbc1d32/Msx1/Pbx1/Gas1/Ece1/Ext1/Zbtb16/Sp9	42
BP	GO:0060173	limb development	42/1918	173/13469	0.242775	1.70486	3.8022	0.000284055	0.0414732	0.0387663	Tbx2/Tbx4/Naglu/Hoxd13/Rab23/Crabp2/Bmp7/Sulf1/Psen1/Tmem107/Ror2/Col2a1/Fbn2/Rdh10/Bcl2l11/Gnas/Slc7a11/Ift80/Shox2/Notch2/Lef1/Asph/Ski/Ift122/Rpgrip1l/Pbx2/Meox2/Alx1/Aff3/Bbs7/Enpp1/Fermt2/Rara/Acd/Tbc1d32/Msx1/Pbx1/Gas1/Ece1/Ext1/Zbtb16/Sp9	42
BP	GO:1904064	positive regulation of cation transmembrane transport	27/1918	96/13469	0.28125	1.97506	3.90676	0.000291172	0.0414732	0.0387663	Grm6/Calm1/Sri/Cacnb3/Gstm7/Cnksr3/Pdpk1/Abl1/Lrrc26/Ntsr1/Asph/Nos1/Adcyap1r1/Cd19/Atp2a1/G6pdx/Ikbkb/Thy1/Ank2/Ppp3r1/Wnk2/Kcne1/Stac3/Npsr1/Agtr1a/Amigo1/Akap6	27
BP	GO:0072073	kidney epithelium development	32/1918	121/13469	0.264463	1.85717	3.85937	0.000291222	0.0414732	0.0387663	Irx2/Bmp7/Wnt11/Lhx1/Smad5/Mtss1/Wnt7b/Smad7/Eya1/Kif26b/Jag1/Notch2/Calb1/Prom1/Klf15/Ptpro/Slit2/Irx3/Bmper/Acat1/Foxj1/Dchs1/Spry1/Rara/Hey1/Aqp11/Agtr1a/Lgr4/Six1/Pbx1/Irx1/Ext1	32
BP	GO:0001654	eye development	72/1918	341/13469	0.211144	1.48274	3.67923	0.000306651	0.0414732	0.0387663	Tbx2/Grm6/Serpinf1/Naglu/Nfix/Klf4/Stat3/Rcn1/Epha2/Bmp7/Prox1/Mertk/Lhx1/Psen1/Ahi1/Limk2/Arsg/Krt12/Atp8a2/Myom1/Fbn2/Nrp1/Rp1/Rdh10/Cfh/Pou2f1/Jag1/Slc7a11/Notch2/Calb1/Ephb2/Ski/Gnb1/Prom1/Foxp2/Ift122/Col4a1/Thy1/Vsx1/Hsf4/Rpgrip1l/Pbx2/Impg2/Tdrd7/Spry1/Clic4/Bbs7/Rara/Tbc1d32/Pbx3/Nphp4/Cited2/Sh3pxd2b/Hesx1/Foxn4/Bcl11b/Dscam/Bmpr1b/Pbx1/Gas1/Elp6/Ntrk2/Mab21l2/Max/Nhs/Sox11/Alms1/Phactr4…	72
BP	GO:0150063	visual system development	72/1918	341/13469	0.211144	1.48274	3.67923	0.000306651	0.0414732	0.0387663	Tbx2/Grm6/Serpinf1/Naglu/Nfix/Klf4/Stat3/Rcn1/Epha2/Bmp7/Prox1/Mertk/Lhx1/Psen1/Ahi1/Limk2/Arsg/Krt12/Atp8a2/Myom1/Fbn2/Nrp1/Rp1/Rdh10/Cfh/Pou2f1/Jag1/Slc7a11/Notch2/Calb1/Ephb2/Ski/Gnb1/Prom1/Foxp2/Ift122/Col4a1/Thy1/Vsx1/Hsf4/Rpgrip1l/Pbx2/Impg2/Tdrd7/Spry1/Clic4/Bbs7/Rara/Tbc1d32/Pbx3/Nphp4/Cited2/Sh3pxd2b/Hesx1/Foxn4/Bcl11b/Dscam/Bmpr1b/Pbx1/Gas1/Elp6/Ntrk2/Mab21l2/Max/Nhs/Sox11/Alms1/Phactr4…	72
BP	GO:0019233	sensory perception of pain	18/1918	54/13469	0.333333	2.34081	4.02285	0.000310719	0.0414732	0.0387663	Cacnb3/Cacna1e/Grm1/Grm8/Fabp5/Ntsr1/Ntrk1/Cdk5/Nmu/Trpa1/Disc1/Kcna1/Ptges/Nlgn2/Dlg2/Cxcl12/Mapk3/Scn9a	18
BP	GO:0061564	axon development	89/1918	441/13469	0.201814	1.41722	3.63007	0.000326141	0.0420587	0.0393136	Rac1/Nfix/Metrn/Lamb1/Klf4/Efnb3/Crabp2/Map2k1/Igf1r/Fzd3/Bmp7/Map2/Xk/Top2b/Etv4/Trpv2/Lhx1/Lama2/Psen1/Cyfip2/Numb/Sema4d/Atp8a2/Trio/Matn2/Wnt7b/Pla2g10/Myot/Nrp1/Klf7/Stk25/Actr3/Lmx1a/Olfm1/Abl1/Shox2/Efna3/Ntrk1/Lmo4/Dab1/Ephb2/Cdk5/Uchl1/Plxna4/Ephb6/Plxna1/Ptpro/Xylt1/Pak1/Gla/Plxnb3/Slit2/Thy1/Neo1/Sema3f/Tbr1/Kifbp/Enpp1/Notch3/Golga4/Cntn5/Dag1/Sema3d/Trpc5/Sipa1l1/Disc1/Tubb2b/Flrt2/K…	89
BP	GO:0050767	regulation of neurogenesis	76/1918	365/13469	0.208219	1.4622	3.6479	0.000330861	0.0420587	0.0393136	Serpinf1/Metrn/Efnb3/Crabp2/Map2k1/Fzd3/Bmp7/Prox1/Etv5/Map2/Prune1/Trpv2/Hey2/Psen1/Btg2/Dlg4/Numb/Sema4d/Wnt7b/Dnm1l/Lta/Rela/Parp6/Nrp1/Serpine2/Stk25/Actr3/Shox2/Notch2/Lef1/Ptprd/Dab1/Ephb2/Cdk5/Trp73/Ski/Rest/Nos1/Plxna4/Plxna1/Bhlhe40/Bhlhe41/Pak1/Plxnb3/Slit2/Trpc6/Thy1/Nptn/Sema3f/Ankrd27/Eef2k/Sh3glb1/Opa1/Atf5/Golga4/Dag1/Hey1/Trpc5/Disc1/Helt/Tenm4/Lig4/Dscam/Amigo1/Trim32/Ntrk2/Map6/…	76
BP	GO:0030326	embryonic limb morphogenesis	30/1918	112/13469	0.267857	1.88101	3.81504	0.000350612	0.0425435	0.0397667	Tbx2/Tbx4/Hoxd13/Rab23/Crabp2/Bmp7/Psen1/Tmem107/Ror2/Fbn2/Rdh10/Bcl2l11/Gnas/Shox2/Notch2/Lef1/Ski/Ift122/Rpgrip1l/Pbx2/Alx1/Aff3/Acd/Tbc1d32/Msx1/Pbx1/Gas1/Ece1/Zbtb16/Sp9	30
BP	GO:0035113	embryonic appendage morphogenesis	30/1918	112/13469	0.267857	1.88101	3.81504	0.000350612	0.0425435	0.0397667	Tbx2/Tbx4/Hoxd13/Rab23/Crabp2/Bmp7/Psen1/Tmem107/Ror2/Fbn2/Rdh10/Bcl2l11/Gnas/Shox2/Notch2/Lef1/Ski/Ift122/Rpgrip1l/Pbx2/Alx1/Aff3/Acd/Tbc1d32/Msx1/Pbx1/Gas1/Ece1/Zbtb16/Sp9	30
BP	GO:0031589	cell-substrate adhesion	65/1918	303/13469	0.214521	1.50646	3.63333	0.00037484	0.0444727	0.04157	Rac1/Vwf/Lamb1/Cd36/Bcam/Crkl/Mertk/Ptprk/Itgb3/Carmil1/Nid2/Olfm4/Dab2/Angpt1/Has2/Emp2/Bcl6/Smoc2/Pdpk1/Lpxn/Efemp2/Men1/Sorbs1/Slk/Vwa2/Adam8/Mkln1/Nrp1/Abl1/Jag1/Trpm7/Bcl2l11/Ptpn1/Src/Postn/Pip5k1a/Cdk5/Dmp1/Parva/Thsd1/Plekha2/Jam3/Thy1/Plet1/Triobp/Phldb2/Micall2/Fermt2/Prex1/Dag1/Col16a1/Pkp2/Onecut1/Disc1/Ecm2/Whamm/Vwc2/Dock1/Col13a1/Frem1/Sema3e/Fbln2/Marcks/Ccl28/Muc4	65
BP	GO:0003205	cardiac chamber development	37/1918	149/13469	0.248322	1.74382	3.72029	0.000399405	0.046357	0.0433313	Tbx2/Luzp1/Naglu/Ltbp1/Dvl3/Fgfrl1/Bmp7/Prox1/Wnt11/Dnah11/Hey2/Myocd/Zfpm2/Sufu/Nrp1/Smad7/Jag1/Shox2/Notch2/Lmo4/Parva/Adprhl1/Slit2/Egln1/Ank2/Kcnk2/Cpe/Cited2/Hey1/Pkp2/Rbm15/Dand5/Gsk3a/Tmem65/Sox11/Dhrs3/Sox4	37
BP	GO:0042471	ear morphogenesis	28/1918	103/13469	0.271845	1.90901	3.77356	0.000419094	0.0467238	0.0436741	Tbx2/Naglu/Rac1/Dvl3/Fzd3/Abr/Gsc/Ror2/Atp8a2/Col2a1/Ttc39c/Eya1/Kcnq4/Ephb2/Rest/Lrig1/Triobp/Ptprq/Enpp1/Hesx1/Insig1/Msx1/Six1/Pcdh15/Gas1/Ankrd24/Mapk3/Sox2	28
BP	GO:0051281	positive regulation of release of sequestered calcium ion into cytosol	10/1918	22/13469	0.454545	3.19201	4.19283	0.000420068	0.0467238	0.0436741	Calm1/Sri/Gstm7/Pdpk1/Abl1/Ntsr1/Cd19/Thy1/Npsr1/Akap6	10
BP	GO:0048880	sensory system development	72/1918	345/13469	0.208696	1.46555	3.5695	0.000437637	0.0476846	0.0445723	Tbx2/Grm6/Serpinf1/Naglu/Nfix/Klf4/Stat3/Rcn1/Epha2/Bmp7/Prox1/Mertk/Lhx1/Psen1/Ahi1/Limk2/Arsg/Krt12/Atp8a2/Myom1/Fbn2/Nrp1/Rp1/Rdh10/Cfh/Pou2f1/Jag1/Slc7a11/Notch2/Calb1/Ephb2/Ski/Gnb1/Prom1/Foxp2/Ift122/Col4a1/Thy1/Vsx1/Hsf4/Rpgrip1l/Pbx2/Impg2/Tdrd7/Spry1/Clic4/Bbs7/Rara/Tbc1d32/Pbx3/Nphp4/Cited2/Sh3pxd2b/Hesx1/Foxn4/Bcl11b/Dscam/Bmpr1b/Pbx1/Gas1/Elp6/Ntrk2/Mab21l2/Max/Nhs/Sox11/Alms1/Phactr4…	72
MF	GO:0042805	actinin binding	14/1915	31/13351	0.451613	3.14856	4.90076	3.55773e-05	0.0338696	0.0332929	Pdlim4/Pdlim2/Myot/Rela/Prom1/Pdlim3/Trpc6/Lmo7/Micall2/Rara/Dag1/Trpc5/Synpo2/Alms1	14
MF	GO:0004930	G protein-coupled receptor activity	36/1915	132/13351	0.272727	1.9014	4.25886	7.3606e-05	0.0350365	0.0344399	Grm6/Fzd3/Esr1/Grm1/Grm8/Gabbr1/Ntsr1/Adgra3/Tmem116/Adcyap1r1/Adgrg1/Lpar2/Adgre4/Ccr3/Npffr2/Adgrl3/Uts2r/Chrm4/Cmklr1/Gpr153/Gpr149/Npsr1/Chrm3/Agtr1a/Htr5b/Adgrf5/Ptafr/Vmn2r51/Calcrl/Adgrg5/Vmn1r227/Adgrv1/Vmn1r203/Gm5127/Vmn2r52/Vmn2r114	36
MF	GO:0004888	transmembrane signaling receptor activity	78/1915	362/13351	0.21547	1.50221	3.96407	0.000111875	0.0355018	0.0348973	Grm6/Il12b/Igf1r/Insr/Insrr/Epha2/Fzd3/Fgfrl1/Mertk/Glra4/Esr1/Grm1/Gabrp/Sema4d/Ror2/Osmr/Ifngr2/Grm8/Gabbr1/Cd74/Nrp1/Il18rap/Il18r1/Il2ra/Ltk/Ntsr1/Notch2/Ntrk1/Ephb2/Adgra3/Antxr2/Tmem116/Plxna4/Adcyap1r1/Ephb6/Plxna1/Gabrq/Plxnb3/Adgrg1/Lpar2/Trpa1/Adgre4/Ror1/Ccr3/Npffr2/Abca7/Adgrl3/Uts2r/Chrm4/Cmklr1/Gpr153/Flt3/Gpr149/Npsr1/Il20rb/Chrm3/Cd300lf/Agtr1a/Lgr4/Htr5b/Bmpr1b/Clec12a/Gabrg3/Ntr…	78

## Sheet: 8cKO_2cKO_up_enrGO
Figure 1–figure supplement 3–Source Data 1. Overrepresentation Analysis (ORA) against Gene Ontology (GO) Analysis by DEG Venn Compartment. GO enrichment for DEG subsets defined by intersecting Venn diagram compartments (Fig. 1E–F). The analysis was run using function enrichGO from R package ClusterProfiler (v4.14.4). Results are shown only for sets with significant enrichment.
ONTOLOGY	ID	Description	GeneRatio	BgRatio	RichFactor	FoldEnrichment	zScore	pvalue	p.adjust	qvalue	geneID	Count
BP	GO:0016072	rRNA metabolic process	70/936	242/13469	0.289256	4.16238	13.5661	7.72972e-26	3.42813e-22	3.38643e-22	Pwp1/Ppan/Emg1/Utp20/Ddx56/Naf1/Tsr3/Mtrex/Rrp7a/Nop9/Ddx21/Znhit3/Ftsj3/Fcf1/Brix1/Dcaf13/Myc/Rrp36/Ercc3/Rcl1/Pdcd11/Pa2g4/Eif4a3/Wdr12/Imp4/Nat10/Exosc9/Ebna1bp2/Mrto4/Mrm2/Ddx54/Bms1/Ercc2/Pop4/Rrp8/Eri1/Xrn1/Gtf3c1/Rbm34/Exosc4/Gtf2h5/Nop14/Fdxacb1/Mrm3/Wdr36/Tsr1/Rpf2/Pak1ip1/Rps21/Urb1/Mars1/Tbl3/Wdr43/Mettl18/Pelo/Wdr55/Wdr74/Rexo4/Ddx10/Las1l/Ddx49/Trp53/Taf1b/Rpl35a/Nol10/Rpl35/Krr1/Lya…	70
BP	GO:0042254	ribosome biogenesis	78/936	308/13469	0.253247	3.64421	12.8289	1.47925e-24	3.28023e-21	3.24033e-21	Pwp1/Ppan/Emg1/Utp20/Ddx56/Naf1/Tsr3/Mtrex/Rrp7a/Nop9/Ddx21/Xpo1/Znhit3/Ftsj3/Fcf1/Brix1/Dcaf13/Rrp36/Rcl1/Pdcd11/Gnl3l/Pa2g4/Eif4a3/Wdr12/Nop58/Eif5b/Imp4/Nat10/Nop56/Exosc9/Nmd3/Ebna1bp2/Mrto4/Zfp593/Gnl2/Mrm2/Ddx54/Bms1/Ercc2/Pop4/Rrp8/Eri1/Noc4l/Rbm34/Exosc4/Gtf2h5/Nop14/Fdxacb1/Mrm3/Wdr36/Tsr1/Rpf2/Pak1ip1/Rps21/Urb1/Mybbp1a/Gtpbp10/Tbl3/Wdr43/Mettl18/Wdr55/Wdr74/Mrps7/Rexo4/Ddx10/Grwd1/Las1…	78
BP	GO:0022613	ribonucleoprotein complex biogenesis	94/936	432/13469	0.217593	3.13115	12.3035	3.83183e-24	5.66472e-21	5.59581e-21	Pwp1/Ppan/Emg1/Utp20/Ddx56/Naf1/Tsr3/Mtrex/Rrp7a/Sart3/Nop9/Snrpf/Ddx21/Snrpd3/Xpo1/Znhit3/Ftsj3/Fcf1/Smn1/Nufip1/Brix1/Dcaf13/Eif3h/Rrp36/Luc7l/Rcl1/Pdcd11/Gnl3l/Pa2g4/Clns1a/Eif4a3/Wdr12/Nop58/Eif5b/Imp4/Eif3m/Nat10/Nop56/Aar2/Exosc9/Nmd3/Ebna1bp2/Mrto4/Zfp593/Gnl2/Mrm2/Ddx54/Bms1/Ercc2/Pop4/Rrp8/Eif3f/Eri1/Noc4l/Rbm34/Exosc4/Gtf2h5/Eif2s3x/Ythdc1/Nop14/Gemin5/Fdxacb1/Mrm3/Wdr36/Tsr1/Rpf2/Pak1i…	94
BP	GO:0006364	rRNA processing	62/936	210/13469	0.295238	4.24846	12.9656	1.5988e-23	1.77267e-20	1.7511e-20	Pwp1/Ppan/Emg1/Utp20/Ddx56/Naf1/Tsr3/Mtrex/Rrp7a/Nop9/Ddx21/Znhit3/Ftsj3/Fcf1/Brix1/Dcaf13/Rrp36/Rcl1/Pdcd11/Pa2g4/Eif4a3/Wdr12/Imp4/Nat10/Exosc9/Ebna1bp2/Mrto4/Mrm2/Ddx54/Bms1/Ercc2/Pop4/Rrp8/Eri1/Rbm34/Exosc4/Gtf2h5/Nop14/Fdxacb1/Mrm3/Wdr36/Tsr1/Rpf2/Pak1ip1/Rps21/Urb1/Tbl3/Wdr43/Mettl18/Wdr55/Wdr74/Rexo4/Ddx10/Las1l/Ddx49/Rpl35a/Nol10/Rpl35/Krr1/Lyar/Utp3/Rps6-ps4	62
BP	GO:0042274	ribosomal small subunit biogenesis	27/936	106/13469	0.254717	3.66537	7.5287	2.18384e-09	1.93707e-06	1.91351e-06	Emg1/Utp20/Tsr3/Rrp7a/Nop9/Fcf1/Dcaf13/Rrp36/Rcl1/Nop58/Imp4/Nat10/Nop56/Bms1/Ercc2/Gtf2h5/Nop14/Wdr36/Tsr1/Rps21/Tbl3/Wdr43/Mrps7/Nol10/Krr1/Utp3/Rps6-ps4	27
BP	GO:0000462	maturation of SSU-rRNA from tricistronic rRNA transcript (SSU-rRNA, 5.8S rRNA, LSU-rRNA)	14/936	32/13469	0.4375	6.29561	8.19599	8.04556e-09	5.94701e-06	5.87467e-06	Nop9/Fcf1/Dcaf13/Rrp36/Rcl1/Bms1/Ercc2/Gtf2h5/Tsr1/Rps21/Tbl3/Wdr43/Nol10/Utp3	14
BP	GO:0030490	maturation of SSU-rRNA	17/936	49/13469	0.346939	4.99243	7.65106	1.38741e-08	8.79025e-06	8.68332e-06	Tsr3/Nop9/Fcf1/Dcaf13/Rrp36/Rcl1/Nat10/Bms1/Ercc2/Gtf2h5/Nop14/Tsr1/Rps21/Tbl3/Wdr43/Nol10/Utp3	17
BP	GO:0006397	mRNA processing	64/936	449/13469	0.142539	2.05113	6.19065	2.52954e-08	1.40231e-05	1.38526e-05	Tbrg4/Snrpb2/Zmat5/Mtrex/Sart3/Snrpf/Snrpd3/Papolg/Ddx5/Snrnp48/Smn1/Zc3h13/Trmt2a/Ppil2/Ncbp2/Tra2b/Paxbp1/Srsf7/Luc7l/Thoc1/Dhx16/Cwf19l1/Clns1a/Eif4a3/Ppil3/Cdc73/Aar2/Ctnnbl1/Dhx36/Larp7/Mettl14/Tfip11/Rbm28/Tra2a/Magohb/Gpkow/Zpr1/Ilf3/Sltm/Srek1/Pus7l/Cpsf1/Rnps1/Tsen34/Ythdc1/Prmt9/Gemin5/Sf3b6/Srrt/Bud31/Hnrnpu/Prkrip1/Aqr/Virma/Thoc6/Pcf11/Ccnb1/Tsen2/Thoc7/Gemin2/Srrm4/Safb/Lsm5/Rnf113a2	64
BP	GO:0042273	ribosomal large subunit biogenesis	18/936	61/13469	0.295082	4.24622	6.9442	9.16275e-08	4.5152e-05	4.46028e-05	Ppan/Znhit3/Ftsj3/Brix1/Wdr12/Ebna1bp2/Mrto4/Mrm2/Rbm34/Rpf2/Pak1ip1/Urb1/Wdr74/Las1l/Mdn1/Rpl35a/Rpl35/Noc2l	18
BP	GO:0032543	mitochondrial translation	27/936	126/13469	0.214286	3.08356	6.42136	1.13025e-07	5.01267e-05	4.95169e-05	Wars2/Mrpl58/Mrps24/Mrpl38/Aars2/Mrps18a/Mrps18b/Mrpl16/Mrpl21/Mrpl11/Mrpl43/Mrpl44/Mrps5/Gfm1/Mrps33/Mrpl17/Mrps22/Mrpl3/Mrps10/Mrpl54/Mrpl55/Mrps34/Mrps27/Mrps7/Mrpl35/Mrpl42/Aurkaip1	27
BP	GO:0008380	RNA splicing	57/936	408/13469	0.139706	2.01036	5.66345	2.9656e-07	0.000115212	0.00011381	Snrpb2/Zmat5/Mtrex/Sart3/Snrpf/Snrpd3/Taf15/Ddx5/Snrnp48/Smn1/Zc3h13/Ppil2/Ncbp2/Tra2b/Paxbp1/Srsf7/Luc7l/Thoc1/Dhx16/Cwf19l1/Clns1a/Eif4a3/Ppil3/Aar2/Ctnnbl1/Larp7/Mettl14/Cdk11b/Tfip11/Rbm28/Tra2a/Zfp638/Magohb/Sgf29/Gpkow/Zpr1/Ilf3/Srek1/Rnps1/Tsen34/Ythdc1/Gemin5/Sf3b6/Bud31/Hnrnpu/Prkrip1/Aqr/Virma/Thoc6/Tsen2/Hnrnph2/Thoc7/Gemin2/Srrm4/Lsm5/Rnf113a2/Prmt1	57
BP	GO:0140053	mitochondrial gene expression	31/936	165/13469	0.187879	2.70357	6.01689	3.11735e-07	0.000115212	0.00011381	Tbrg4/Wars2/Kansl3/Mrpl58/Polrmt/Mrps24/Elac2/Mrpl38/Aars2/Mrps18a/Mrps18b/Mrpl16/Mrpl21/Mrpl11/Mrpl43/Mrpl44/Mrps5/Gfm1/Mrps33/Mrpl17/Mrps22/Mrpl3/Mrps10/Mrpl54/Mrpl55/Mrps34/Mrps27/Mrps7/Mrpl35/Mrpl42/Aurkaip1	31
BP	GO:0000463	maturation of LSU-rRNA from tricistronic rRNA transcript (SSU-rRNA, 5.8S rRNA, LSU-rRNA)	9/936	18/13469	0.5	7.19498	7.18722	9.98197e-07	0.000340539	0.000336397	Ppan/Znhit3/Ftsj3/Wdr12/Rbm34/Rpf2/Pak1ip1/Urb1/Rpl35	9
BP	GO:0006406	mRNA export from nucleus	16/936	60/13469	0.266667	3.83732	6.01933	2.12871e-06	0.000653864	0.00064591	Nxf1/Xpo1/Nup155/Ncbp2/Thoc1/Eif4a3/Eif4e/Magohb/Nup93/Ythdc1/Nup133/Thoc6/Sem1/Nup160/Thoc7/Thoc2l	16
BP	GO:0000460	maturation of 5.8S rRNA	12/936	35/13469	0.342857	4.9337	6.36787	2.21149e-06	0.000653864	0.00064591	Mtrex/Nop9/Ftsj3/Fcf1/Rcl1/Wdr12/Exosc9/Eri1/Exosc4/Rps21/Urb1/Las1l	12
BP	GO:0006403	RNA localization	28/936	161/13469	0.173913	2.5026	5.24158	5.56989e-06	0.0015439	0.00152512	Ranbp2/Phax/Nxf1/Xpo1/Hnrnpab/Znhit3/Nup155/Ncbp2/Senp2/Srsf7/Thoc1/Eif4a3/Terf1/Rftn2/Nop58/Dhx36/Eif4e/Magohb/Sec13/Nup93/Ythdc1/Nup133/Hnrnpu/Thoc6/Sem1/Nup160/Thoc7/Thoc2l	28
BP	GO:0000470	maturation of LSU-rRNA	10/936	27/13469	0.37037	5.32961	6.15405	7.09958e-06	0.00185215	0.00182962	Ppan/Znhit3/Ftsj3/Wdr12/Rbm34/Rpf2/Pak1ip1/Urb1/Las1l/Rpl35	10
BP	GO:0006360	transcription by RNA polymerase I	16/936	68/13469	0.235294	3.38587	5.39008	1.23494e-05	0.0029234	0.00288784	Pwp1/Gtf2h1/Ddx21/Ercc3/Ercc2/Flna/Gtf2h5/Baz2a/Mars1/Mybbp1a/Dhx33/Wdr43/Taf1b/Erbb2/Polr1c/Lyar	16
BP	GO:0022904	respiratory electron transport chain	19/936	91/13469	0.208791	3.0045	5.24315	1.25241e-05	0.0029234	0.00288784	Etfb/Slc25a22/Mdh2/Uqcrb/Dnajc15/Ndufv3/Ndufv2/Ndufs1/Ndufa10/Mtch2/Ndufaf1/Etfdh/Uqcrc2/Cox4i1/Uqcrfs1/Mybbp1a/Ccnb1/Chchd2/Chchd2-ps	19
BP	GO:0022900	electron transport chain	20/936	100/13469	0.2	2.87799	5.15117	1.46653e-05	0.00325204	0.00321248	Etfb/Por/Slc25a22/Mdh2/Uqcrb/Dnajc15/Ndufv3/Ndufv2/Ndufs1/Ndufa10/Mtch2/Ndufaf1/Etfdh/Uqcrc2/Cox4i1/Uqcrfs1/Mybbp1a/Ccnb1/Chchd2/Chchd2-ps	20
BP	GO:0006405	RNA export from nucleus	17/936	77/13469	0.220779	3.177	5.23533	1.64401e-05	0.003472	0.00342977	Phax/Nxf1/Xpo1/Nup155/Ncbp2/Thoc1/Eif4a3/Eif4e/Magohb/Nup93/Ythdc1/Nup133/Thoc6/Sem1/Nup160/Thoc7/Thoc2l	17
BP	GO:0000466	maturation of 5.8S rRNA from tricistronic rRNA transcript (SSU-rRNA, 5.8S rRNA, LSU-rRNA)	9/936	24/13469	0.375	5.39623	5.89071	1.83388e-05	0.00353619	0.00349318	Nop9/Ftsj3/Fcf1/Rcl1/Wdr12/Exosc9/Eri1/Rps21/Urb1	9
BP	GO:0090151	establishment of protein localization to mitochondrial membrane	9/936	24/13469	0.375	5.39623	5.89071	1.83388e-05	0.00353619	0.00349318	Oxa1l/Tomm40/Timm13/Hspa4/Timm22/Tomm22/Tomm70a/Maip1/Mtch2	9
BP	GO:0000479	endonucleolytic cleavage of tricistronic rRNA transcript (SSU-rRNA, 5.8S rRNA, LSU-rRNA)	7/936	16/13469	0.4375	6.29561	5.79199	5.01724e-05	0.00894179	0.00883302	Nop9/Fcf1/Rcl1/Bms1/Tsr1/Rps21/Tbl3	7
BP	GO:0006457	protein folding	26/936	162/13469	0.160494	2.3095	4.58231	5.04047e-05	0.00894179	0.00883302	Fkbp10/Ranbp2/Sgta/Trap1/Pfdn2/Clpx/Unc45b/Dnajb12/Hspa4/Cwc27/Ppil2/Pfdn6/Hspa9/Ttc4/Ppil3/Tor1b/Pdia3/Bag1/Dnajc2/Grpel1/Fkbp4/Vbp1/Zpr1/Tbce/Stub1/Fkbp6	26
BP	GO:0051028	mRNA transport	20/936	109/13469	0.183486	2.64036	4.69906	5.41801e-05	0.00924188	0.00912946	Ranbp2/Nxf1/Xpo1/Nup155/Ncbp2/Senp2/Srsf7/Thoc1/Eif4a3/Eif4e/Magohb/Sec13/Nup93/Ythdc1/Nup133/Thoc6/Sem1/Nup160/Thoc7/Thoc2l	20
BP	GO:0051236	establishment of RNA localization	23/936	137/13469	0.167883	2.41583	4.55183	6.6224e-05	0.0108779	0.0107456	Ranbp2/Phax/Nxf1/Xpo1/Nup155/Ncbp2/Senp2/Srsf7/Thoc1/Eif4a3/Terf1/Rftn2/Eif4e/Magohb/Sec13/Nup93/Ythdc1/Nup133/Thoc6/Sem1/Nup160/Thoc7/Thoc2l	23
BP	GO:0001833	inner cell mass cell proliferation	7/936	17/13469	0.411765	5.92528	5.55295	8.01892e-05	0.0122634	0.0121143	Setdb1/Cops2/Gins1/Ints1/Gins4/Zpr1/Pelo	7
BP	GO:0051131	chaperone-mediated protein complex assembly	7/936	17/13469	0.411765	5.92528	5.55295	8.01892e-05	0.0122634	0.0121143	Hspa4/Pfdn6/Psmg2/Ndufaf1/Psmg3/Stub1/Lonp1	7
BP	GO:0006260	DNA replication	35/936	256/13469	0.136719	1.96738	4.27048	8.99601e-05	0.0132991	0.0131373	Tfpt/Cdc42/Endog/Polrmt/Lig3/Esco2/Senp2/Rfc4/Smc3/Poll/Tk1/Terf1/Mcm6/Rbms1/Gins1/Pole3/Orc1/Nasp/Dnajc2/Ino80b/Pold3/Rrm1/Polb/Gins4/Zpr1/Polq/Supt16/Dtl/Rtel1/Pura/Ino80c/Grwd1/Trp53/Bod1l/Khdc3	35
BP	GO:0042773	ATP synthesis coupled electron transport	14/936	64/13469	0.21875	3.1478	4.70666	0.000100586	0.0137647	0.0135973	Uqcrb/Dnajc15/Ndufv3/Ndufv2/Ndufs1/Ndufa10/Mtch2/Ndufaf1/Uqcrc2/Cox4i1/Uqcrfs1/Ccnb1/Chchd2/Chchd2-ps	14
BP	GO:0042775	mitochondrial ATP synthesis coupled electron transport	14/936	64/13469	0.21875	3.1478	4.70666	0.000100586	0.0137647	0.0135973	Uqcrb/Dnajc15/Ndufv3/Ndufv2/Ndufs1/Ndufa10/Mtch2/Ndufaf1/Uqcrc2/Cox4i1/Uqcrfs1/Ccnb1/Chchd2/Chchd2-ps	14
BP	GO:0032259	methylation	28/936	188/13469	0.148936	2.14319	4.31362	0.000102421	0.0137647	0.0135973	Emg1/Setdb1/Snrpd3/Ftsj3/Trmt2a/Wdr4/Larp7/Mettl14/Coq3/Trmt44/Nsun7/Mrm2/Thumpd3/Prmt3/Rrp8/Ilf3/Dph5/Btg1/Prmt9/Fdxacb1/Mrm3/Etfbkmt/Mettl18/Coq5/Bhmt2/Prdm14/N6amt1/Prmt1	28
BP	GO:0050657	nucleic acid transport	22/936	134/13469	0.164179	2.36253	4.33176	0.000132831	0.0168315	0.0166268	Ranbp2/Phax/Nxf1/Xpo1/Nup155/Ncbp2/Senp2/Srsf7/Thoc1/Eif4a3/Rftn2/Eif4e/Magohb/Sec13/Nup93/Ythdc1/Nup133/Thoc6/Sem1/Nup160/Thoc7/Thoc2l	22
BP	GO:0050658	RNA transport	22/936	134/13469	0.164179	2.36253	4.33176	0.000132831	0.0168315	0.0166268	Ranbp2/Phax/Nxf1/Xpo1/Nup155/Ncbp2/Senp2/Srsf7/Thoc1/Eif4a3/Rftn2/Eif4e/Magohb/Sec13/Nup93/Ythdc1/Nup133/Thoc6/Sem1/Nup160/Thoc7/Thoc2l	22
BP	GO:0000375	RNA splicing, via transesterification reactions	35/936	263/13469	0.13308	1.91501	4.09526	0.000154713	0.0180496	0.0178301	Snrpb2/Sart3/Snrpf/Snrpd3/Ddx5/Smn1/Ncbp2/Tra2b/Paxbp1/Srsf7/Luc7l/Dhx16/Cwf19l1/Clns1a/Eif4a3/Aar2/Ctnnbl1/Larp7/Mettl14/Tfip11/Tra2a/Magohb/Gpkow/Ilf3/Rnps1/Ythdc1/Gemin5/Sf3b6/Bud31/Hnrnpu/Aqr/Gemin2/Srrm4/Lsm5/Rnf113a2	35
BP	GO:0000377	RNA splicing, via transesterification reactions with bulged adenosine as nucleophile	35/936	263/13469	0.13308	1.91501	4.09526	0.000154713	0.0180496	0.0178301	Snrpb2/Sart3/Snrpf/Snrpd3/Ddx5/Smn1/Ncbp2/Tra2b/Paxbp1/Srsf7/Luc7l/Dhx16/Cwf19l1/Clns1a/Eif4a3/Aar2/Ctnnbl1/Larp7/Mettl14/Tfip11/Tra2a/Magohb/Gpkow/Ilf3/Rnps1/Ythdc1/Gemin5/Sf3b6/Bud31/Hnrnpu/Aqr/Gemin2/Srrm4/Lsm5/Rnf113a2	35
BP	GO:0000398	mRNA splicing, via spliceosome	35/936	263/13469	0.13308	1.91501	4.09526	0.000154713	0.0180496	0.0178301	Snrpb2/Sart3/Snrpf/Snrpd3/Ddx5/Smn1/Ncbp2/Tra2b/Paxbp1/Srsf7/Luc7l/Dhx16/Cwf19l1/Clns1a/Eif4a3/Aar2/Ctnnbl1/Larp7/Mettl14/Tfip11/Tra2a/Magohb/Gpkow/Ilf3/Rnps1/Ythdc1/Gemin5/Sf3b6/Bud31/Hnrnpu/Aqr/Gemin2/Srrm4/Lsm5/Rnf113a2	35
BP	GO:0071826	protein-RNA complex organization	27/936	183/13469	0.147541	2.12311	4.18034	0.000158723	0.0180496	0.0178301	Naf1/Rrp7a/Sart3/Snrpf/Snrpd3/Znhit3/Smn1/Nufip1/Brix1/Eif3h/Luc7l/Clns1a/Eif3m/Aar2/Mrto4/Tfip11/Mrm2/Eif3f/Eif2s3x/Ythdc1/Gemin5/Rpf2/Ago4/Mrps7/Mdn1/Gemin2/Rps6-ps4	27
BP	GO:0051168	nuclear export	24/936	155/13469	0.154839	2.22812	4.20257	0.000171317	0.0189947	0.0187637	Cse1l/Ranbp2/Phax/Nxf1/Nop9/Xpo1/Nup155/Ncbp2/Thoc1/Hspa9/Eif4a3/Nmd3/Eif4e/Magohb/Nup93/Ythdc1/Nup133/Thoc6/Sem1/Nup160/Thoc7/Mdn1/Wipf1/Thoc2l	24
BP	GO:0022618	protein-RNA complex assembly	26/936	176/13469	0.147727	2.12579	4.10832	0.000204231	0.0220918	0.0218231	Naf1/Rrp7a/Sart3/Snrpf/Snrpd3/Znhit3/Smn1/Nufip1/Brix1/Eif3h/Luc7l/Clns1a/Eif3m/Aar2/Mrto4/Mrm2/Eif3f/Eif2s3x/Ythdc1/Gemin5/Rpf2/Ago4/Mrps7/Mdn1/Gemin2/Rps6-ps4	26
BP	GO:0006399	tRNA metabolic process	25/936	167/13469	0.149701	2.15419	4.10145	0.000217758	0.0229942	0.0227145	Polr3d/Wars2/Thg1l/Hars2/Elac2/Dph3/Trmt2a/Aars2/Wdr4/Rpp21/Dtwd2/Nat10/Exosc9/Tars2/Trmt44/Thumpd3/Pop4/Thumpd1/Tsen34/Elac1/Mars1/Tsen2/Ctu2/Urm1/Ctag2l1	25
BP	GO:0033044	regulation of chromosome organization	33/936	248/13469	0.133065	1.91479	3.97355	0.000236569	0.0243996	0.0241029	Tfpt/Cdc20/Naf1/Setdb1/Zfp207/Trip13/Pinx1/Myc/Ndc80/Psmg2/Kat5/Gnl3l/Terf1/Nat10/Dhx36/Lmna/Smc2/Bcl7a/Anapc7/Ino80b/Smc4/Smarce1/Cdc16/Rtel1/Hnrnpu/Tasor/Ccnb1/Gnl3/Shcbp1l/Ino80c/Xrcc1/Trp53/Khdc3	33
BP	GO:0009451	RNA modification	22/936	142/13469	0.15493	2.22943	4.02479	0.000312067	0.0314549	0.0310723	Emg1/Thg1l/Naf1/Tsr3/Hnrnpab/Ftsj3/Dph3/Wdr4/Dtwd2/Nat10/Larp7/Mettl14/Trmt44/Mrm2/Thumpd3/Thumpd1/Pus7l/Fdxacb1/Mrm3/Virma/Ctu2/Urm1	22
BP	GO:1903008	organelle disassembly	13/936	64/13469	0.203125	2.92296	4.21394	0.000384335	0.0378783	0.0374176	Rrp7a/Cdk5rap3/Mrpl58/Ascc2/Vrk1/Plin3/Kat5/Ankzf1/Aurka/Usp10/Elac1/Pelo/Gigyf2	13
BP	GO:0043414	macromolecule methylation	19/936	117/13469	0.162393	2.33683	3.96879	0.000429324	0.040873	0.0403758	Emg1/Snrpd3/Ftsj3/Wdr4/Larp7/Mettl14/Trmt44/Mrm2/Thumpd3/Prmt3/Ilf3/Btg1/Prmt9/Fdxacb1/Mrm3/Etfbkmt/Mettl18/N6amt1/Prmt1	19
BP	GO:0006289	nucleotide-excision repair	14/936	73/13469	0.191781	2.75972	4.11983	0.000433153	0.040873	0.0403758	Gtf2h4/Gtf2h1/Hus1/Ercc3/Kat5/Poll/Gtf2h3/Bcl7a/Ercc2/Pold3/Gtf2h5/Smarce1/Trp53/Hmgb1	14
CC	GO:0030684	preribosome	31/951	105/13576	0.295238	4.21467	9.07561	2.63226e-12	1.55567e-09	1.39925e-09	Ppan/Emg1/Utp20/Rrp7a/Nop9/Ftsj3/Fcf1/Dcaf13/Rrp36/Rcl1/Pdcd11/Wdr12/Nop58/Imp4/Nat10/Nop56/Ebna1bp2/Mrto4/Bms1/Noc4l/Nop14/Wdr36/Tbl3/Wdr43/Wdr74/Mdn1/Nol10/Krr1/Utp3/Rps6-ps4/Noc2l	31
CC	GO:0005759	mitochondrial matrix	57/951	333/13576	0.171171	2.44355	7.31992	2.236e-10	6.60738e-08	5.94305e-08	Tbrg4/Ndufa9/Myg1/Timm44/Wars2/Etfb/Trap1/Sardh/Clpx/Mrpl58/Mdh2/Polrmt/Mrps24/Elac2/Mrpl38/Lrrc59/Pdhb/Dnajc15/Mrps18a/Hspa9/Mrps18b/Mrpl16/Mrpl21/Mrpl11/Mrpl43/Lactb2/Maip1/Mrpl44/Ndufa10/Ndufaf1/Mrps5/Etfdh/Tars2/Grpel1/Acads/Mrps33/Mrpl17/Mrps22/Mrpl3/Mrps10/Mrpl54/Mrpl55/Mrps34/Etfbkmt/Lonp1/Arhgap11a/Ccnb1/Mrps27/Coq5/Dmgdh/Mrps7/Nags/Mrpl35/Hadhb/Trp53/Mrpl42/Aurkaip1	57
CC	GO:0098798	mitochondrial protein-containing complex	37/951	169/13576	0.218935	3.12541	7.63069	3.42751e-10	6.7522e-08	6.07331e-08	Timm44/Tomm40/Etfb/Clpx/Mrpl58/Timm13/Polrmt/Mrps24/Mrpl38/Timm22/Dnajc15/Tomm22/Mrps18a/Mrps18b/Mrpl16/Mrpl21/Mrpl11/Mrpl43/Mrpl44/Pdss1/Mrps5/Etfdh/Grpel1/Mrps33/Mrpl17/Mrps22/Mrpl3/Mrps10/Mrpl54/Mrpl55/Mrps34/Mrps27/Mrps7/Mrpl35/Hadhb/Mrpl42/Aurkaip1	37
CC	GO:0005743	mitochondrial inner membrane	66/951	438/13576	0.150685	2.1511	6.72095	2.17576e-09	3.21469e-07	2.89148e-07	Ndufa9/Oxa1l/Timm44/Tomm40/Trap1/Gcat/Endog/Clpx/Mrpl58/Slc25a22/Mdh2/Timm13/Mrps24/Mrpl38/Timm22/Uqcrb/Dnajc15/Tomm22/Mrps18a/Ndufv3/Ndufv2/Mrps18b/Mrpl16/Mrpl21/Mrpl11/Mrpl43/Rhot2/Slc25a10/Ndufs1/Maip1/Mrpl44/Ndufa10/Mpc2/Yme1l1/Pdss1/Mtch2/Crls1/Mrps5/Acad9/Etfdh/Coq3/Dmac1/Fgr/Grpel1/Mrps33/Mrpl17/Uqcrc2/Cox4i1/Mrps22/Mrpl3/Slc8b1/Ndufb7/Mrps10/Mrpl54/Mrpl55/Uqcrfs1/Mrps34/Mrps27/Coq5/Atpaf2…	66
CC	GO:0000313	organellar ribosome	24/951	89/13576	0.269663	3.84957	7.40221	5.83944e-09	5.75185e-07	5.17354e-07	Mrpl58/Mrps24/Mrpl38/Mrps18a/Mrps18b/Mrpl16/Mrpl21/Mrpl11/Mrpl43/Mrpl44/Mrps5/Mrps33/Mrpl17/Mrps22/Mrpl3/Mrps10/Mrpl54/Mrpl55/Mrps34/Mrps27/Mrps7/Mrpl35/Mrpl42/Aurkaip1	24
CC	GO:0005761	mitochondrial ribosome	24/951	89/13576	0.269663	3.84957	7.40221	5.83944e-09	5.75185e-07	5.17354e-07	Mrpl58/Mrps24/Mrpl38/Mrps18a/Mrps18b/Mrpl16/Mrpl21/Mrpl11/Mrpl43/Mrpl44/Mrps5/Mrps33/Mrpl17/Mrps22/Mrpl3/Mrps10/Mrpl54/Mrpl55/Mrps34/Mrps27/Mrps7/Mrpl35/Mrpl42/Aurkaip1	24
CC	GO:0032040	small-subunit processome	21/951	73/13576	0.287671	4.10665	7.30438	1.48947e-08	1.25754e-06	1.1311e-06	Emg1/Utp20/Rrp7a/Fcf1/Dcaf13/Rcl1/Pdcd11/Nop58/Imp4/Nat10/Nop56/Bms1/Noc4l/Nop14/Wdr36/Tbl3/Wdr43/Nol10/Krr1/Utp3/Rps6-ps4	21
CC	GO:0019866	organelle inner membrane	68/951	482/13576	0.141079	2.01397	6.22096	1.921e-08	1.41914e-06	1.27645e-06	Ndufa9/Oxa1l/Timm44/Tomm40/Trap1/Gcat/Endog/Clpx/Mrpl58/Slc25a22/Mdh2/Timm13/Mrps24/Mrpl38/Timm22/Uqcrb/Dnajc15/Tomm22/Tra2b/Mrps18a/Ndufv3/Ndufv2/Mrps18b/Mrpl16/Mrpl21/Mrpl11/Mrpl43/Rhot2/Slc25a10/Ndufs1/Maip1/Mrpl44/Ndufa10/Mpc2/Yme1l1/Pdss1/Mtch2/Crls1/Mrps5/Acad9/Etfdh/Coq3/Dmac1/Fgr/Grpel1/Mrps33/Mrpl17/Uqcrc2/Cox4i1/Mrps22/Mrpl3/Slc8b1/Ndufb7/Mrps10/Mrpl54/Mrpl55/Uqcrfs1/Mrps34/Mrps27/Coq5/…	68
CC	GO:0030686	90S preribosome	11/951	24/13576	0.458333	6.54294	7.45913	2.01261e-07	1.32161e-05	1.18873e-05	Utp20/Rrp7a/Nop9/Rrp36/Wdr12/Imp4/Noc4l/Nop14/Wdr36/Tbl3/Noc2l	11
CC	GO:0000439	transcription factor TFIIH core complex	7/951	10/13576	0.7	9.99285	7.80757	8.06037e-07	4.76368e-05	4.28473e-05	Gtf2h4/Gtf2h1/Ccnh/Ercc3/Gtf2h3/Ercc2/Gtf2h5	7
CC	GO:0000314	organellar small ribosomal subunit	12/951	33/13576	0.363636	5.19109	6.61563	1.16615e-06	5.7433e-05	5.16585e-05	Mrps24/Mrps18a/Mrps18b/Mrps5/Mrps33/Mrps22/Mrps10/Mrps34/Mrps27/Mrps7/Mrpl42/Aurkaip1	12
CC	GO:0005763	mitochondrial small ribosomal subunit	12/951	33/13576	0.363636	5.19109	6.61563	1.16615e-06	5.7433e-05	5.16585e-05	Mrps24/Mrps18a/Mrps18b/Mrps5/Mrps33/Mrps22/Mrps10/Mrps34/Mrps27/Mrps7/Mrpl42/Aurkaip1	12
CC	GO:0005840	ribosome	37/951	236/13576	0.15678	2.23811	5.266	3.00317e-06	0.000136529	0.000122801	Mrpl58/Ascc2/Mrps24/Mrpl38/Psma6/Mrps18a/Mrps18b/Mrpl16/Mrpl21/Mrpl11/Mrpl43/Mrpl44/Mrps5/Mrps33/Rpl28/Mrpl17/Usp10/Mrps22/Mrpl3/Mrps10/Mrpl54/Mrpl55/Abcf1/Mrps34/Rps21/Rpl22l1/Mrps27/Pelo/Mrps7/Mrpl35/Rpl35a/Mrpl42/Rpl35/Aurkaip1/Rpl37rt/Rpl39/Rps6-ps4	37
CC	GO:0005675	transcription factor TFIIH holo complex	7/951	12/13576	0.583333	8.32737	6.96931	4.69396e-06	0.000198152	0.000178229	Gtf2h4/Gtf2h1/Ccnh/Ercc3/Gtf2h3/Ercc2/Gtf2h5	7
CC	GO:0005681	spliceosomal complex	32/951	197/13576	0.162437	2.31886	5.11759	6.51226e-06	0.000256583	0.000230785	Snrpb2/Zmat5/Mtrex/Snrpf/Snrpd3/Ddx5/Snrnp48/Cwc27/Ppil2/Tra2b/Luc7l/Dhx16/Cwf19l1/Clns1a/Eif4a3/Ppil3/Aar2/Ctnnbl1/Tfip11/Rbm28/Tra2a/Magohb/Gpkow/Srek1/Sf3b6/Bud31/Hnrnpu/Prkrip1/Aqr/Gemin2/Lsm5/Rnf113a2	32
CC	GO:0044391	ribosomal subunit	31/951	192/13576	0.161458	2.3049	4.9978	1.02505e-05	0.000378627	0.000340559	Mrpl58/Mrps24/Mrpl38/Mrps18a/Mrps18b/Mrpl16/Mrpl21/Mrpl11/Mrpl43/Mrpl44/Mrps5/Mrps33/Rpl28/Mrpl17/Mrps22/Mrpl3/Mrps10/Mrpl54/Mrpl55/Mrps34/Rps21/Mrps27/Mrps7/Mrpl35/Rpl35a/Mrpl42/Rpl35/Aurkaip1/Rpl37rt/Rpl39/Rps6-ps4	31
CC	GO:0030687	preribosome, large subunit precursor	8/951	18/13576	0.444444	6.34467	6.22735	1.30755e-05	0.000454565	0.000408862	Ppan/Ftsj3/Wdr12/Ebna1bp2/Mrto4/Wdr74/Mdn1/Noc2l	8
CC	GO:0000315	organellar large ribosomal subunit	14/951	56/13576	0.25	3.56887	5.2868	2.24846e-05	0.000699389	0.00062907	Mrpl58/Mrpl38/Mrps18a/Mrpl16/Mrpl21/Mrpl11/Mrpl43/Mrpl44/Mrpl17/Mrpl3/Mrpl54/Mrpl55/Mrpl35/Mrpl42	14
CC	GO:0005762	mitochondrial large ribosomal subunit	14/951	56/13576	0.25	3.56887	5.2868	2.24846e-05	0.000699389	0.00062907	Mrpl58/Mrpl38/Mrps18a/Mrpl16/Mrpl21/Mrpl11/Mrpl43/Mrpl44/Mrpl17/Mrpl3/Mrpl54/Mrpl55/Mrpl35/Mrpl42	14
CC	GO:0032806	carboxy-terminal domain protein kinase complex	7/951	21/13576	0.333333	4.7585	4.73063	0.000393687	0.0116335	0.0104638	Gtf2h4/Gtf2h1/Ccnh/Ercc3/Gtf2h3/Ercc2/Gtf2h5	7
CC	GO:0015934	large ribosomal subunit	19/951	117/13576	0.162393	2.31824	3.93031	0.000474172	0.0133446	0.0120029	Mrpl58/Mrpl38/Mrps18a/Mrpl16/Mrpl21/Mrpl11/Mrpl43/Mrpl44/Rpl28/Mrpl17/Mrpl3/Mrpl54/Mrpl55/Mrpl35/Rpl35a/Mrpl42/Rpl35/Rpl37rt/Rpl39	19
CC	GO:0016607	nuclear speck	44/951	379/13576	0.116095	1.65731	3.56204	0.000636962	0.0171111	0.0153907	Gtf2h4/Gcat/Snrpb2/Hdac5/Nxf1/Surf2/Mtrex/Sart3/Ascc2/Ddx5/Zc3h13/Bnip3l/Srsf7/Thoc1/Ring1/Brd2/Cxxc1/Eif4a3/Dhx36/Lmna/Eif4e/Tfip11/Rbm19/Zfp638/Kif22/Srek1/Smc4/Zfp395/Rnps1/Ythdc1/Bclaf1/Rtel1/Arhgap18/Rreb1/Ap5z1/Hnrnpu/Baz2a/Kazn/Virma/S100pbp/Thoc6/Atpaf2/Rexo4/Thoc7	44
CC	GO:0015935	small ribosomal subunit	14/951	79/13576	0.177215	2.52984	3.74269	0.00106829	0.0274505	0.0246905	Mrps24/Mrps18a/Mrps18b/Mrps5/Mrps33/Mrps22/Mrps10/Mrps34/Rps21/Mrps27/Mrps7/Mrpl42/Aurkaip1/Rps6-ps4	14
CC	GO:0034709	methylosome	5/951	13/13576	0.384615	5.49058	4.4457	0.00133583	0.0326315	0.0293506	Snrpf/Snrpd3/Erh/Clns1a/Prmt1	5
CC	GO:0000428	DNA-directed RNA polymerase complex	15/951	90/13576	0.166667	2.37925	3.60302	0.00138035	0.0326315	0.0293506	Polr3d/Gtf2h4/Gtf2h1/Polrmt/Ccnh/Ercc3/Cdc73/Polr3f/Gtf2h3/Ercc2/Gtf2h5/Polr3g/Pex2/Polr2k/Polr1c	15
CC	GO:0000228	nuclear chromosome	29/951	230/13576	0.126087	1.79995	3.35813	0.00148006	0.0336429	0.0302603	Tfpt/Hus1/Lig3/Pinx1/Nufip1/Kat5/Smc3/Mcm6/Gins1/Exosc9/Sycp1/Smc2/Pole3/Orc1/Rcc1/Smarcad1/Ino80b/Pold3/Hcfc1/Polb/Gins4/Cfdp1/Mlh1/Smc4/Hnrnpu/Fkbp6/Smc1a/Ino80c/Suds3	29
CC	GO:0034708	methyltransferase complex	16/951	101/13576	0.158416	2.26147	3.49234	0.00168662	0.0365761	0.0328986	Snrpf/Snrpd3/Erh/Zc3h13/Wdr4/Cxxc1/Clns1a/Mettl14/Mtf2/Hcfc1/Virma/N6amt1/Ino80c/Las1l/Bod1l/Prmt1	16
CC	GO:0030880	RNA polymerase complex	15/951	92/13576	0.163043	2.32753	3.50649	0.00173288	0.0365761	0.0328986	Polr3d/Gtf2h4/Gtf2h1/Polrmt/Ccnh/Ercc3/Cdc73/Polr3f/Gtf2h3/Ercc2/Gtf2h5/Polr3g/Pex2/Polr2k/Polr1c	15
CC	GO:0000346	transcription export complex	5/951	14/13576	0.357143	5.09839	4.21076	0.00195897	0.0399225	0.0359086	Nxf1/Thoc1/Thoc6/Thoc7/Thoc2l	5
CC	GO:0071013	catalytic step 2 spliceosome	15/951	94/13576	0.159574	2.27801	3.41243	0.00215756	0.0425039	0.0382304	Snrpb2/Mtrex/Snrpf/Snrpd3/Ddx5/Cwc27/Ppil2/Eif4a3/Ppil3/Tfip11/Magohb/Sf3b6/Bud31/Hnrnpu/Aqr	15
CC	GO:0061695	transferase complex, transferring phosphorus-containing groups	30/951	248/13576	0.120968	1.72687	3.17064	0.00236612	0.045109	0.0405736	Polr3d/Gtf2h4/Prkacb/Gtf2h1/Polrmt/Ccnh/Dapk1/Ercc3/Phkg1/Cdc73/Polr3f/Ccnc/Pole3/Mad2l2/Cdk11b/Gtf2h3/Ercc2/Pold3/Pik3r2/Gmppa/Pik3c3/Gtf2h5/Polr3g/Atg101/Pex2/Ccnb1/Polr2k/Las1l/Polr1c/Gmppb	30
MF	GO:0140098	catalytic activity, acting on RNA	49/927	318/13351	0.154088	2.21923	6.01074	1.00568e-07	8.26666e-05	7.71724e-05	Wars2/Emg1/Ddx56/Thg1l/Tsr3/Endog/Mtrex/Dhx58/Mrpl58/Hars2/Ddx21/Polrmt/Elac2/Ftsj3/Ddx5/Trmt2a/Aars2/Rpp21/Dtwd2/Rcl1/Eif4a3/Lactb2/Ankzf1/Mrpl44/Dhx36/Tars2/Mettl14/Trmt44/Ddx55/Mrm2/Ddx54/Thumpd3/Pop4/Eri1/Xrn1/Tsen34/Elac1/Fdxacb1/Mrm3/Mars1/Aqr/Dhx33/Ddx24/Tsen2/Ago4/Polr2k/Ddx10/Ddx49/Polr1c	49
MF	GO:0030515	snoRNA binding	10/927	32/13351	0.3125	4.50074	5.41563	3.91399e-05	0.0127105	0.0118658	Nolc1/Ddx21/Nufip1/Nop58/Imp4/Nop56/Bms1/Nop14/Tsr1/Tbl3	10
MF	GO:0016887	ATP hydrolysis activity	45/927	351/13351	0.128205	1.84646	4.38972	4.63889e-05	0.0127105	0.0118658	Ddx56/Trap1/Clpx/Mtrex/Dhx58/Ddx21/Ddx5/Myh3/Abcd4/Trip13/Rfc4/Kif6/Kifc5b/Hspa9/Ercc3/Smc3/Eif4a3/Mcm6/Yme1l1/Tor1b/Ola1/Dhx36/Smc2/Orc1/Psmc2/Ddx55/Ddx54/Smarcad1/Ercc2/Kif22/Mlh1/Polq/Smc4/Kif15/Rtel1/Abcf1/Aqr/Dhx33/Smc1a/Lonp1/Ddx24/Atp10d/Myh7/Ddx10/Ddx49	45
MF	GO:0003724	RNA helicase activity	14/927	66/13351	0.212121	3.05505	4.57155	0.00014151	0.019609	0.0183058	Ddx56/Mtrex/Dhx58/Ddx21/Ddx5/Eif4a3/Dhx36/Ddx55/Ddx54/Aqr/Dhx33/Ddx24/Ddx10/Ddx49	14
MF	GO:0003735	structural constituent of ribosome	25/927	163/13351	0.153374	2.20895	4.24193	0.000145489	0.019609	0.0183058	Mrps24/Mrps18a/Mrps18b/Mrpl16/Mrpl21/Mrpl11/Mrpl43/Mrps5/Rpl28/Mrpl17/Mrps22/Mrpl3/Mrps10/Mrpl54/Mrpl55/Mrps34/Rps21/Rpl22l1/Mrps7/Mrpl35/Rpl35a/Rpl35/Rpl37rt/Rpl39/Rps6-ps4	25
MF	GO:0004519	endonuclease activity	18/927	100/13351	0.18	2.59243	4.36601	0.000160664	0.019609	0.0183058	Endog/Elac2/Rpp21/Rcl1/Lactb2/Ankzf1/Mrpl44/Dclre1c/Dffb/Pop4/Polq/Tsen34/Elac1/Tsen2/Ago4/Xrcc1/Rexo4/Las1l	18
MF	GO:0004386	helicase activity	23/927	146/13351	0.157534	2.26887	4.21088	0.000176365	0.019609	0.0183058	Ddx56/Mtrex/Dhx58/Ddx21/Ddx5/Rfc4/Ercc3/Dhx16/Eif4a3/Mcm6/Dhx36/Ddx55/Ddx54/Smarcad1/Ercc2/Polq/Rtel1/Aqr/Dhx33/Ddx24/Ddx10/Ddx49/Rad54b	23
MF	GO:0008186	ATP-dependent activity, acting on RNA	14/927	68/13351	0.205882	2.96519	4.43774	0.000197837	0.019609	0.0183058	Ddx56/Mtrex/Dhx58/Ddx21/Ddx5/Eif4a3/Dhx36/Ddx55/Ddx54/Aqr/Dhx33/Ddx24/Ddx10/Ddx49	14
MF	GO:0004518	nuclease activity	25/927	167/13351	0.149701	2.15604	4.10638	0.000214698	0.019609	0.0183058	Myg1/Pld3/Endog/Polrmt/Elac2/Rpp21/Rcl1/Lactb2/Ankzf1/Mrpl44/Dclre1c/Aptx/Dffb/Pop4/Aen/Eri1/Xrn1/Polq/Tsen34/Elac1/Tsen2/Ago4/Xrcc1/Rexo4/Las1l	25
MF	GO:0004549	tRNA-specific ribonuclease activity	6/927	15/13351	0.4	5.76095	5.03937	0.000320013	0.0252809	0.0236007	Elac2/Rpp21/Pop4/Tsen34/Elac1/Tsen2	6
MF	GO:0043021	ribonucleoprotein complex binding	26/927	182/13351	0.142857	2.05748	3.92358	0.000345327	0.0252809	0.0236007	Oxa1l/Snrpb2/Nolc1/Snrpd3/Ddx5/Eif4a3/Maip1/Wdr12/Ola1/Nmd3/Zfp593/Dnajc2/Ung/Prmt3/Eri1/Gtpbp6/Gemin5/Abcf1/Rps21/Hnrnpu/Dhx33/Mrps27/Pelo/Eif1a/Rpl35/Prmt1	26
MF	GO:0004521	RNA endonuclease activity	12/927	56/13351	0.214286	3.08622	4.27327	0.000378096	0.0252809	0.0236007	Endog/Elac2/Rpp21/Rcl1/Lactb2/Ankzf1/Mrpl44/Pop4/Tsen34/Elac1/Tsen2/Ago4	12
MF	GO:0003729	mRNA binding	39/927	320/13351	0.121875	1.75529	3.7355	0.000415769	0.0252809	0.0236007	Nxf1/Nkap/Ddx21/Taf15/Ddx5/Ncbp2/Tra2b/Srsf7/Luc7l/Eif4a3/Rbms1/Exosc9/Dhx36/Larp7/Mettl14/Eif4e/Slc4a1ap/Zfp638/Ilf3/Cpsf1/Exosc4/Rnps1/Ythdc1/Paip2/Gemin5/Sf3b6/Hnrnpu/Aqr/Dhx33/Pcf11/Pum3/Gnl3/Mrps7/Trp53/Dppa5a/Rpl35/Srrm4/Rps6-ps4/Thoc2l	39
MF	GO:0003743	translation initiation factor activity	11/927	49/13351	0.22449	3.23319	4.27774	0.000430575	0.0252809	0.0236007	Eif2b2/Eif3h/Eif1ad/Eif5b/Eif3m/Eif4e/Eif2b3/Eif2b4/Eif3f/Eif2s3x/Eif1a	11
MF	GO:0090079	translation regulator activity, nucleic acid binding	16/927	93/13351	0.172043	2.47783	3.90639	0.00061638	0.0337776	0.0315327	Eif2b2/Mrpl58/Eif3h/Eif1ad/Eif5b/Eif3m/Gfm1/Eif4e/Eif2b3/Eif2b4/Eif3f/Eif2s3x/Paip2/Abcf1/Pura/Eif1a	16
MF	GO:0140101	catalytic activity, acting on a tRNA	18/927	112/13351	0.160714	2.31467	3.81634	0.000676234	0.0347415	0.0324325	Wars2/Thg1l/Mrpl58/Hars2/Elac2/Trmt2a/Aars2/Rpp21/Dtwd2/Ankzf1/Tars2/Trmt44/Thumpd3/Pop4/Tsen34/Elac1/Mars1/Tsen2	18

## Sheet: 8cWT_2cWT_up_enrGO
Figure 1–figure supplement 3–Source Data 1. Overrepresentation Analysis (ORA) against Gene Ontology (GO) Analysis by DEG Venn Compartment. GO enrichment for DEG subsets defined by intersecting Venn diagram compartments (Fig. 1E–F). The analysis was run using function enrichGO from R package ClusterProfiler (v4.14.4). Results are shown only for sets with significant enrichment.
ONTOLOGY	ID	Description	GeneRatio	BgRatio	RichFactor	FoldEnrichment	zScore	pvalue	p.adjust	qvalue	geneID	Count
MF	GO:0022836	gated channel activity	19/530	166/13351	0.114458	2.88326	4.96411	3.24947e-05	0.0231687	0.0224726	Clcn4/Hcn2/Vdac1/Ryr2/Vdac2/Asic1/Tmc6/Tmem63a/Gabrd/Chrna9/P2rx4/Clcnka/Grin3b/Kcnh3/Grin3a/Cacna2d4/Itpr3/Kcnk12/Ncs1	19
MF	GO:0015267	channel activity	24/530	263/13351	0.0912548	2.29876	4.32501	0.0001304	0.0286548	0.0277939	Clcn4/Fxyd4/Clic3/Gsdma/Hcn2/Vdac1/Ryr2/Vdac2/Asic1/Tmc6/Bok/Tmem63a/Gabrd/Chrna9/P2rx4/Clcnka/Grin3b/Kcnh3/Grin3a/Cacna2d4/Itpr3/Kcnk12/Atp6v1a/Ncs1	24
MF	GO:0022803	passive transmembrane transporter activity	24/530	263/13351	0.0912548	2.29876	4.32501	0.0001304	0.0286548	0.0277939	Clcn4/Fxyd4/Clic3/Gsdma/Hcn2/Vdac1/Ryr2/Vdac2/Asic1/Tmc6/Bok/Tmem63a/Gabrd/Chrna9/P2rx4/Clcnka/Grin3b/Kcnh3/Grin3a/Cacna2d4/Itpr3/Kcnk12/Atp6v1a/Ncs1	24
MF	GO:0005216	monoatomic ion channel activity	22/530	234/13351	0.0940171	2.36834	4.29342	0.000160756	0.0286548	0.0277939	Clcn4/Fxyd4/Clic3/Hcn2/Vdac1/Ryr2/Vdac2/Asic1/Tmc6/Tmem63a/Gabrd/Chrna9/P2rx4/Clcnka/Grin3b/Kcnh3/Grin3a/Cacna2d4/Itpr3/Kcnk12/Atp6v1a/Ncs1	22

## Sheet: 8cWT_8cKO_up_enrGO
Figure 1–figure supplement 3–Source Data 1. Overrepresentation Analysis (ORA) against Gene Ontology (GO) Analysis by DEG Venn Compartment. GO enrichment for DEG subsets defined by intersecting Venn diagram compartments (Fig. 1E–F). The analysis was run using function enrichGO from R package ClusterProfiler (v4.14.4). Results are shown only for sets with significant enrichment.
ONTOLOGY	ID	Description	GeneRatio	BgRatio	RichFactor	FoldEnrichment	zScore	pvalue	p.adjust	qvalue	geneID	Count
BP	GO:2000271	positive regulation of fibroblast apoptotic process	4/174	13/13469	0.307692	23.8179	9.41609	1.75654e-05	0.0453011	0.0434882	Pmaip1/Men1/Socs1/Prdm11	4
