# Supplementary material for: SETDB1 enables development beyond cleavage stages by extinguishing the MERVL-driven two-cell totipotency transcriptional program in the mouse embryo
Source: eLife. 2026 Feb 16;15:RP109248. doi: 10.7554/eLife.109248 (PMC12908936; doi:10.7554/eLife.109248)
Supplement: Figure 1—figure supplement 5—source data 1. — TE expression analysis by DESeq2 (v146.0) using multimapped reads across four comparisons. [file elife-109248-fig1-figsupp5-data1.xlsx]

## Sheet: FOURWAY_2cWT_vs_2cKO_DE_TEmulti
Figure 1–figure supplement 5–Source Data 1. Differential TE Expression (DTE) – Multimapping Reads. TE expression analysis by DESeq2 (v146.0) using multimapped reads across four comparisons.
tetranscripts_id	baseMean	log2FoldChange	lfcSE	stat	pvalue	padj	gene_id	family_id	class_id	Direction	FOUR_WAY_UP_COMP	FOUR_WAY_DOWN_COMP	tetranscripts_id	TZSC118	TZSC119	TZSC120	TZSC121	TZSC122	TZSC123	TZSC125	TZSC126	TZSC127	TZSC128	TZSC129	TZSC130	TZSC131	TZSC132	TZSC94	TZSC95	TZSC96	TZSC97	TZSC98	TZSC99	TZSC100	TZSC101	TZSC102	TZSC103	TZSC104	TZSC105	TZSC106	TZSC107	TZSC108	TZSC109	TZSC110	TZSC111	TZSC112	TZSC113	TZSC114	TZSC115
														2c WT	2c WT	2c WT	2c WT	2c WT	2c WT	8c WT	8c WT	8c WT	8c WT	8c WT	8c WT	8c WT	8c WT	2c KO	2c KO	2c KO	2c KO	2c KO	2c KO	2c KO	2c KO	2c KO	2c KO	2c KO	2c KO	2c KO	2c KO	2c KO	8c KO	8c KO	8c KO	8c KO	8c KO	8c KO	8c KO
MamRep4096:hAT:DNA	10.6246	-5.44232	1.89843	-2.86676	0.00414701	0.0422571	MamRep4096	hAT	DNA	Down	NA	2cWT-2cKO	MamRep4096:hAT:DNA	0	0	0.889166	0	0	0	0	0	28.0748	0	0	6.94698	0	0	0	1.06577	0.549607	0.720463	44.3684	1.04416	1.89748	0	22.637	35.9026	0	104.984	46.1022	0	0	0	20.7574	0	0	6.04848	59.5015	3.64524
MER63D:hAT-Blackjack:DNA	44.8507	-4.23248	1.01468	-4.17126	3.02919e-05	0.00125745	MER63D	hAT-Blackjack	DNA	Down	NA	2cWT-2cKO	MER63D:hAT-Blackjack:DNA	21.0145	1.98063	1.77833	0	0	0	0	27.574	0.49254	0	6.52855	1.98485	26.0411	81.8129	22.6471	83.6631	140.699	23.7753	96.7553	18.7948	51.232	106.482	48.1036	75.8391	1.47813	515.376	36.3623	17.6859	58.5366	82.1011	17.8338	13.4759	2.34297	58.4687	18.615	0
MER5C:hAT-Charlie:DNA	16.9899	-6.75458	1.91109	-3.53442	0.000408676	0.00857701	MER5C	hAT-Charlie	DNA	Down	NA	2cWT-2cKO	MER5C:hAT-Charlie:DNA	0	0	0	0	0	0	0	0	20.1941	0	9.79283	15.3826	1.44673	0	24.2647	79.9329	0	10.807	55.5942	0	0	86.0918	0	56.0725	13.3031	1.59067	0	0.609858	108.253	0	0	83.5508	0	0	32.5762	29.1619
MER58D:hAT-Charlie:DNA	11.8711	-5.74321	1.74763	-3.28629	0.00101518	0.0164598	MER58D	hAT-Charlie	DNA	Down	NA	2cWT-2cKO:8cKO-2cKO	MER58D:hAT-Charlie:DNA	0	0.396127	0	4.49622	0	0	0	10.0269	7.88064	0	1.63214	0	1.44673	1.16047	0.808825	31.9732	4.39686	0	0	49.5974	133.772	0	8.48888	0	0	104.984	0.649327	67.0844	0	0.922485	9.06309	0.449198	0	0	0	0
MER119:hAT-Charlie:DNA	56.93	-2.27412	0.70678	-3.21757	0.00129281	0.0193724	MER119	hAT-Charlie	DNA	Down	8cWT-2cWT	2cWT-2cKO	MER119:hAT-Charlie:DNA	14.0097	17.8257	5.335	0	38.2283	1.48729	31.0523	19.4271	107.866	114.71	150.157	35.2311	53.5288	45.2582	26.6912	109.242	84.0899	13.6888	166.783	64.7376	29.4109	5.66394	15.5629	36.7094	10.3469	306.999	3.24663	12.807	20.0468	35.0544	60.8104	42.6738	63.2602	53.4283	23.2687	120.293
MER113:hAT-Charlie:DNA	36.2908	-3.93997	1.29347	-3.04604	0.00231876	0.0283427	MER113	hAT-Charlie	DNA	Down	8cWT-2cWT	2cWT-2cKO	MER113:hAT-Charlie:DNA	2.33495	0.396127	0	0	8.49518	1.48729	1.10901	18.8005	103.926	0	21.2178	9.42804	7.23363	0.580233	3.63971	0	3.84725	3.60232	4.27648	23.4935	73.053	0	6.36666	4.84079	0.739063	233.033	50.6475	0.609858	0	2.76745	24.558	94.3316	142.921	14.1131	1.32964	455.655
MER102c:hAT-Charlie:DNA	16.1105	-4.99565	1.73059	-2.88668	0.00389334	0.0404786	MER102c	hAT-Charlie	DNA	Down	8cWT-2cWT	2cWT-2cKO	MER102c:hAT-Charlie:DNA	0	0	0	0	0	2.97459	171.897	18.1738	0	10.1215	4.89641	0.992425	23.1476	0	26.2868	65.0121	1.09921	0	0.534559	139.395	5.69244	0	27.5888	0.4034	0	50.9014	1.94798	0	0	4.61242	38.2988	0.449198	0	0	1.66205	0
Charlie26a:hAT-Charlie:DNA	14.3173	-6.56702	2.28644	-2.87217	0.00407669	0.041876	Charlie26a	hAT-Charlie	DNA	Down	NA	2cWT-2cKO	Charlie26a:hAT-Charlie:DNA	0	0	0	0	0	0	0	0	0	101.215	0	0	0	0	30.3309	0	22.5339	89.3375	62.5435	0.522078	14.2311	0	0	1.2102	164.072	0	0	0	0	5.53491	30.6975	5.83957	0	1.00808	0.664821	0
MER45A:hAT-Tip100:DNA	19.5178	-6.36758	1.84499	-3.45129	0.000557908	0.0107038	MER45A	hAT-Tip100	DNA	Down	8cWT-2cWT	2cWT-2cKO	MER45A:hAT-Tip100:DNA	0	0	0	0	0	1.48729	4.43604	26.9473	15.7613	0	0	54.0872	41.955	0	7.27942	20.7826	190.714	0.720463	0	0	0	70.2328	0	47.6011	0	152.704	0.649327	0	0.801872	1.84497	5.55479	53.0053	0	0	25.5956	0
MER45C:hAT-Tip100:DNA	8.30788	-5.6542	2.02471	-2.79259	0.00522877	0.0492677	MER45C	hAT-Tip100	DNA	Down	NA	2cWT-2cKO	MER45C:hAT-Tip100:DNA	0	0	0	0	0	0	0	0	0	6.74764	6.52855	39.697	0	0	2.83089	0	35.7245	5.04324	10.1566	65.2597	0	29.4525	0	2.8238	0	34.1994	11.0386	7.3183	0	0	0	28.2995	0	0	22.2715	0
Looper:PiggyBac:DNA	33.0948	-3.69619	1.19041	-3.10498	0.00190289	0.0249762	Looper	PiggyBac	DNA	Down	8cWT-2cWT	2cWT-2cKO	Looper:PiggyBac:DNA	0	0	0	4.49622	8.49518	2.97459	0	61.4148	18.7165	263.158	128.939	15.8788	1.44673	67.8873	59.853	35.7034	2.74804	7.9251	1.60368	80.4	0.94874	5.66394	10.6111	2.017	0	44.5387	35.0637	85.99	15.2356	12.9148	60.2257	1.34759	0	109.881	14.6261	0
Tigger6b:TcMar-Tigger:DNA	33.9952	-4.05747	1.1892	-3.41194	0.000645034	0.011866	Tigger6b	TcMar-Tigger	DNA	Down	8cWT-2cWT	2cWT-2cKO	Tigger6b:TcMar-Tigger:DNA	0	15.4489	0	0	0	0	0	58.9081	93.09	134.953	0	35.7273	5.7869	0.580233	3.2353	1.59866	19.7859	86.4556	7.48383	50.1195	45.5395	5.66394	1.41481	39.1298	0.739063	290.297	27.9211	55.4971	121.083	10.1473	37.4218	8.53476	46.8594	20.1616	34.2383	0
MamRep137:TcMar-Tigger:DNA	25.9022	-4.10227	1.31802	-3.11245	0.00185542	0.0246268	MamRep137	TcMar-Tigger	DNA	Down	NA	2cWT-2cKO	MamRep137:TcMar-Tigger:DNA	5.44822	1.98063	1.77833	0	4.24759	1.48729	0	46.3745	20.6867	0	3.26428	91.3031	0	0	0.808825	1.06577	37.3733	88.617	60.9398	0.522078	100.566	46.4443	17.6852	51.6351	224.675	0	9.7399	0.609858	16.0374	90.4035	23.9733	4.04278	0	3.02424	0	3.64524
Tigger17a:TcMar-Tigger:DNA	76.1996	-2.18396	0.754209	-2.89569	0.00378323	0.0397251	Tigger17a	TcMar-Tigger	DNA	Down	NA	2cWT-2cKO	Tigger17a:TcMar-Tigger:DNA	0.778316	75.2641	0.889166	40.466	0	17.8475	249.528	50.7612	71.9108	97.8408	58.757	40.6894	53.5288	9.86397	100.294	180.116	62.1056	109.51	85.5295	98.6727	0	275.267	100.452	177.092	18.4766	145.546	55.8421	17.076	127.498	135.605	30.1128	37.7326	3.51446	89.7192	83.7675	109.357
MusHAL1:L1:LINE	924.124	-2.96501	0.344955	-8.59535	8.30084e-18	1.05599e-14	MusHAL1	L1	LINE	Down	8cWT-2cWT	2cWT-2cKO:8cKO-2cKO	MusHAL1:L1:LINE	179.013	183.803	291.646	305.743	144.418	62.4663	221.802	282.007	571.839	438.597	721.405	496.709	1173.29	581.394	847.244	1487.82	1849.98	1874.65	1311.27	1139.7	1612.86	407.803	1524.46	1432.47	2048.68	4367.97	749.973	1232.52	833.946	492.607	623.599	870.096	632.602	852.836	921.774	721.757
L1_Mur1:L1:LINE	703.463	-2.42832	0.382679	-6.3456	2.21566e-10	6.9137e-08	L1_Mur1	L1	LINE	Down	8cWT-2cWT	2cWT-2cKO	L1_Mur1:L1:LINE	235.052	230.546	70.2441	157.368	42.4759	249.865	566.705	414.864	778.705	597.166	594.098	414.834	1966.1	435.175	1050.26	505.709	467.716	1119.6	857.968	716.813	932.612	619.635	900.528	829.389	820.36	3126.46	279.211	358.597	789.042	952.004	661.898	645.947	681.804	553.436	766.871	1017.02
Lx5:L1:LINE	1776.06	-1.36154	0.273237	-4.983	6.26071e-07	5.68899e-05	Lx5	L1	LINE	Down	NA	2cWT-2cKO	Lx5:L1:LINE	667.796	870.687	992.309	1537.71	569.177	938.482	1142.28	1202.6	1716.99	1356.28	1147.39	1119.95	1971.89	1439.56	1894.67	1871.5	2478.18	2237.04	2385.74	2499.71	1675.48	2100.19	3556.13	3259.47	1719.06	6186.11	959.705	1574.04	1377.62	854.221	1510.61	1575.79	1608.45	1888.13	2901.61	1308.64
L1_Mus1:L1:LINE	5208.05	-1.06159	0.235121	-4.51509	6.32892e-06	0.000381999	L1_Mus1	L1	LINE	Down	8cWT-2cWT	2cWT-2cKO	L1_Mus1:L1:LINE	1823.6	3028.39	2930.69	3160.84	1754.26	2296.38	5921.01	5469.05	7037.41	4089.07	4729.94	4707.07	7601.09	6708.08	4157.36	4105.36	4573.28	4354.48	5814.94	5057.37	4225.69	5563.12	5016.93	6529.83	4203.79	14118.8	3811.55	2568.11	4149.69	5091.19	5952.69	6720	4287.64	6046.47	7546.05	7928.39
L1MEf:L1:LINE	368.941	-1.64895	0.383489	-4.29986	1.7091e-05	0.000813091	L1MEf	L1	LINE	Down	NA	2cWT-2cKO:8cKO-2cKO	L1MEf:L1:LINE	51.3689	250.748	85.3599	467.607	46.7235	157.653	269.49	199.285	280.255	391.363	217.074	141.917	684.301	252.982	355.883	547.807	438.587	530.261	441.012	967.41	609.091	397.608	482.451	563.549	548.385	1274.13	266.873	187.227	614.234	190.032	111.388	313.091	233.126	251.012	420.499	251.521
Lx5b:L1:LINE	610.993	-1.79026	0.424387	-4.21846	2.45975e-05	0.00108768	Lx5b	L1	LINE	Down	NA	2cWT-2cKO	Lx5b:L1:LINE	216.372	389.393	227.626	440.629	33.9807	226.069	202.949	616.655	835.347	151.822	164.846	260.015	1005.47	417.768	1015.88	739.646	1052.5	299.713	599.776	635.891	563.552	924.354	820.591	1382.85	206.938	2609.49	574.654	1219.11	634.28	487.072	342.351	596.535	424.078	578.638	914.461	277.038
Lx4A:L1:LINE	1002.62	-1.60525	0.383282	-4.18816	2.81219e-05	0.00120711	Lx4A	L1	LINE	Down	NA	2cWT-2cKO	Lx4A:L1:LINE	403.168	547.051	318.321	458.614	229.37	667.795	285.016	1039.04	1143.18	236.167	571.248	566.675	1792.49	587.196	755.847	1303.44	1455.91	952.453	1666.76	1493.14	902.252	777.092	1162.27	1229.56	1636.29	4441.94	820.749	681.822	712.062	1222.29	1012.14	1314.8	943.045	1318.57	1620.17	597.819
L1_Mus3:L1:LINE	5365.25	-1.23819	0.295841	-4.18533	2.84747e-05	0.0012137	L1_Mus3	L1	LINE	Down	8cWT-2cWT	2cWT-2cKO	L1_Mus3:L1:LINE	2516.3	2051.54	2469.21	4078.07	2191.76	2806.52	3382.48	4587.94	6425.18	4051.96	4344.75	2945.52	8185.57	5682.23	4573.5	5150.88	6291.9	5525.95	5700.01	5659.32	6388.82	3835.62	5951.41	8067.59	3808.39	22901.6	3383.64	4611.75	3134.52	5756.3	5154.56	6238.91	3583.57	6572.68	7476.25	5770.41
Lx:L1:LINE	2782.59	-1.32137	0.320274	-4.12576	3.69515e-05	0.00145155	Lx	L1	LINE	Down	NA	2cWT-2cKO	Lx:L1:LINE	1090.42	985.167	697.106	2531.37	2009.11	1445.65	2201.39	1594.91	3236.97	1605.94	1623.98	1040.06	4842.19	2001.81	3076.77	3618.3	2879.94	3502.17	3769.71	4312.88	2572.03	3059.66	3764.11	4512.02	3263.7	10255	1524.62	2092.42	2397.6	2795.13	2335.06	3037.48	1016.85	3307.51	3743.61	2023.11
L1MEd:L1:LINE	394.47	-1.78836	0.435789	-4.10374	4.06533e-05	0.00158567	L1MEd	L1	LINE	Down	8cWT-2cWT	2cWT-2cKO	L1MEd:L1:LINE	165.781	103.389	156.493	188.841	38.2283	72.8774	102.029	742.618	257.598	107.962	132.203	587.516	292.238	540.197	455.368	163.596	213.797	216.139	176.405	292.364	445.908	344.367	250.422	334.015	495.912	1798.25	232.459	364.695	494.755	557.181	334.165	401.134	791.924	599.808	632.577	1009.73
L1ME4c:L1:LINE	112.15	-4.13682	1.00845	-4.10215	4.09323e-05	0.00158906	L1ME4c	L1	LINE	Down	8cWT-2cWT	2cWT-2cKO	L1ME4c:L1:LINE	0	39.6127	2.6675	0	0	19.3348	327.158	57.6547	120.672	0	68.5498	56.072	1.44673	62.085	174.706	200.898	88.4868	17.2911	169.99	362.322	432.626	7.92951	79.2295	150.468	136.727	835.896	1.94798	190.886	6.41497	78.4112	3.80065	24.2567	318.644	2.01616	55.5126	0
L1MB4:L1:LINE	428.162	-1.96684	0.481958	-4.08093	4.48564e-05	0.0017093	L1MB4	L1	LINE	Down	NA	2cWT-2cKO	L1MB4:L1:LINE	107.408	293.926	105.811	26.9773	25.4855	389.671	113.119	115.936	297.001	300.27	39.1713	255.55	419.55	231.513	526.14	236.069	354.497	274.497	817.876	494.408	669.811	522.215	1295.97	563.549	297.103	2113.2	300.638	429.34	487.538	309.032	401.699	298.717	138.235	686.503	587.702	382.75
L1_Mus2:L1:LINE	3131.6	-0.974094	0.244821	-3.9788	6.92644e-05	0.00231881	L1_Mus2	L1	LINE	Down	8cWT-2cWT:8cKO-2cKO	2cWT-2cKO	L1_Mus2:L1:LINE	1998.72	1257.7	1500.02	2122.21	828.28	1206.19	2282.34	3268.15	3732.96	3657.22	3556.43	2767.87	5075.11	3506.93	2295.85	2475.26	3177.28	2230.55	2949.16	3195.12	3148.87	1329.89	3131.69	4163.49	2190.58	7251.06	2632.37	2044.25	1556.43	3872.59	4540.9	4232.79	3038.83	3864.98	5359.12	4837.23
Lx3_Mus:L1:LINE	1607.56	-1.49265	0.386899	-3.85798	0.000114329	0.00343777	Lx3_Mus	L1	LINE	Down	NA	2cWT-2cKO	Lx3_Mus:L1:LINE	445.197	566.461	902.503	1627.63	925.975	351.001	733.056	1153.09	1219.04	337.382	514.124	385.557	2703.93	1088.52	2600.78	2089.45	2829.38	650.579	3073.72	2636.49	1348.16	1655	1658.16	2300.18	1619.29	7036.32	1053.86	1771.03	1485.07	1059.01	1458.57	1950.42	1026.22	1268.17	2699.17	1622.13
L1VL2:L1:LINE	1102.25	-1.47783	0.388758	-3.80142	0.000143871	0.00408907	L1VL2	L1	LINE	Down	8cWT-2cWT	2cWT-2cKO	L1VL2:L1:LINE	662.347	593.794	257.858	148.375	488.473	699.028	850.612	925.609	1215.1	634.278	1059.26	842.569	1617.44	999.742	1167.54	942.143	1203.64	1283.15	1373.28	470.392	906.047	490.497	923.873	1150.5	1090.86	6318.93	379.856	1159.34	1035.22	1145.73	1276.73	1253.26	677.118	1518.17	1533.74	845.695
L1MDa:L1:LINE	360.411	-1.81715	0.487043	-3.73099	0.000190726	0.00504677	L1MDa	L1	LINE	Down	NA	2cWT-2cKO	L1MDa:L1:LINE	140.875	268.574	64.9091	350.705	29.7331	69.9028	121.991	377.889	248.733	124.831	148.525	169.209	506.354	240.217	429.486	584.576	413.854	342.22	592.826	225.016	483.858	675.141	950.047	931.853	782.668	1363.2	135.709	170.76	44.9048	317.335	320.424	234.032	118.32	721.786	341.053	142.164
L1M5:L1:LINE	1597.51	-1.12764	0.302577	-3.72679	0.000193937	0.00509908	L1M5	L1	LINE	Down	NA	2cWT-2cKO	L1M5:L1:LINE	1074.86	1492.61	577.069	1218.47	369.54	786.778	1455.02	1384.34	1630.31	1376.52	2392.71	870.357	1987.8	1132.04	2093.64	1415.88	2178.09	2153.47	1902.5	1586.59	1530.32	1062.55	1510.31	1930.67	2437.43	6751.59	1164.89	1207.52	1260.54	1229.67	1619.95	1763.55	984.047	1514.14	1043.77	1702.33
L1ME2:L1:LINE	208.885	-2.3744	0.637717	-3.72328	0.000196648	0.00514529	L1ME2	L1	LINE	Down	8cWT-2cWT	2cWT-2cKO	L1ME2:L1:LINE	79.3883	26.1444	64.0199	26.9773	0	123.445	262.836	340.288	211.3	40.4859	161.582	198.485	230.029	123.59	393.493	289.357	113.769	289.626	336.772	156.101	176.466	134.802	31.8333	400.172	343.664	1247.08	50.6475	151.855	92.2152	11.0698	155.242	161.262	70.2891	313.513	216.732	696.24
L1_Mur3:L1:LINE	3110.75	-1.18305	0.321098	-3.68439	0.000229251	0.0057249	L1_Mur3	L1	LINE	Down	NA	2cWT-2cKO	L1_Mur3:L1:LINE	1404.86	1084.99	1276.84	3088.9	2000.62	2045.03	1174.44	2118.81	3088.22	2665.32	1876.96	1976.42	4419.74	1910.13	4015.81	4042.47	3490.01	4051.89	2752.98	3948.47	3064.43	2751.54	4633.51	5330.52	2198.71	14798.8	1844.74	2295.51	2576.41	2806.2	2435.34	3097.67	1525.27	3289.37	3383.94	3634.3
Lx5c:L1:LINE	1299.9	-1.27677	0.349217	-3.65611	0.000256076	0.00613766	Lx5c	L1	LINE	Down	NA	2cWT-2cKO	Lx5c:L1:LINE	926.197	687.28	858.045	436.133	454.492	618.714	567.814	1408.15	1642.13	1535.09	954.801	551.789	1611.65	935.336	800.332	1501.67	1504.27	1871.76	1234.3	974.719	1011.36	1342.35	1489.09	1838.7	1481.82	6260.07	575.953	1087.99	1198	1098.68	1086.11	1727.62	520.139	1494.98	2089.2	933.181
L1MEb:L1:LINE	17.9848	-5.10063	1.40264	-3.63646	0.000276412	0.00652113	L1MEb	L1	LINE	Down	8cWT-2cWT	2cWT-2cKO	L1MEb:L1:LINE	0	0	2.6675	0	0	0	52.1235	0	19.209	3.37382	1.63214	0.496213	2.89345	31.3326	18.1986	47.4269	0.549607	0	0	26.626	9.4874	64.5689	0.707406	9.27819	2.95625	50.106	116.23	10.9775	4.00936	115.311	21.0497	0.449198	0	24.1939	29.5845	0
L1_Mus4:L1:LINE	1102.54	-1.23959	0.351344	-3.52814	0.000418483	0.00874952	L1_Mus4	L1	LINE	Down	8cWT-2cWT	2cWT-2cKO	L1_Mus4:L1:LINE	397.72	633.803	1203.04	224.811	412.016	266.226	780.744	1121.13	1022.02	678.138	1212.68	621.258	1853.25	1035.72	630.074	1185.67	1565.28	1089.34	1243.92	1040.5	584.424	1214.35	1074.55	1121.85	798.188	4386.27	937.628	797.085	926.162	1262.88	962.734	1206.55	494.367	1623.01	1929.31	2085.08
L1M3c:L1:LINE	15.4475	-6.73302	1.93458	-3.48035	0.000500753	0.00990604	L1M3c	L1	LINE	Down	NA	2cWT-2cKO	L1M3c:L1:LINE	0	0	0	0	0	0	0	4.38677	31.5225	0	0	0	28.9345	0	129.008	21.3154	7.14489	0	0	35.5013	126.182	1.13279	0	71.8051	0	36.5854	1.29865	0	0	0.922485	0.877073	50.3102	0	3.02424	21.6067	0
Lx4B:L1:LINE	571.92	-1.64953	0.475702	-3.46758	0.000525174	0.0102663	Lx4B	L1	LINE	Down	NA	2cWT-2cKO	Lx4B:L1:LINE	307.435	353.741	134.264	121.398	148.666	413.468	26.6163	321.488	589.078	87.7194	538.606	156.803	668.387	446.2	697.207	892.052	568.843	775.939	263.003	980.462	963.92	476.903	1064.65	701.108	657.766	1827.68	520.111	770.251	489.944	784.112	205.527	644.599	312.787	451.62	728.311	76.55
L1VL4:L1:LINE	1133.72	-1.43083	0.417748	-3.42511	0.00061456	0.0114973	L1VL4	L1	LINE	Down	NA	2cWT-2cKO	L1VL4:L1:LINE	312.883	405.634	1171.03	615.982	89.1994	304.895	334.921	985.771	1069.8	1147.1	595.73	503.656	2210.6	926.633	1478.53	1098.28	1048.1	1197.41	824.825	1058.25	1711.53	458.779	940.85	1476.44	1379.09	4899.26	599.329	798.305	609.422	1549.77	1379.34	1091.55	590.428	2053.46	2232.8	947.762
Lx3A:L1:LINE	752.024	-1.51576	0.442706	-3.42386	0.000617386	0.0115241	Lx3A	L1	LINE	Down	NA	2cWT-2cKO:8cKO-2cKO	Lx3A:L1:LINE	490.339	510.607	603.744	530.554	42.4759	193.348	548.961	464.998	799.885	364.373	138.732	154.322	1271.67	992.199	615.111	1201.13	1019.52	1246.4	652.163	806.61	1316.85	897.167	925.287	1676.93	1644.42	3202.02	407.128	730.001	649.516	364.381	310.191	530.053	514.282	563.517	1084.66	185.907
L1M2:L1:LINE	1805.97	-0.931847	0.282899	-3.29392	0.000987994	0.0161298	L1M2	L1	LINE	Down	NA	2cWT-2cKO	L1M2:L1:LINE	880.276	974.076	1166.59	1654.61	1057.65	1047.05	1412.88	1376.82	1402.26	1339.41	2528.18	1398.33	2181.66	1526.01	2326.18	1434	1853.28	1945.97	2101.89	1580.85	1384.21	1932.53	1686.46	2785.47	2101.9	7564.42	1151.26	1256.92	1189.18	2470.41	1486.05	1464.39	2012.61	1393.17	1572.63	2522.5
L1_Mur2:L1:LINE	2427.55	-1.26816	0.385518	-3.28948	0.00100371	0.0163059	L1_Mur2	L1	LINE	Down	NA	2cWT-2cKO	L1_Mur2:L1:LINE	808.671	908.319	657.094	3691.39	819.785	577.07	1338.58	1400.63	2213.97	3583	3032.51	1338.78	3624.05	1905.49	3369.97	2990.56	3362.5	1976.23	2993	1926.47	1836.76	1786.41	2366.98	3057.37	2806.96	11879.1	1186.97	2023.51	1256.53	2881.84	2156.72	2418.03	1265.2	2613.95	3351.03	2340.24
L1M3:L1:LINE	563.248	-1.43163	0.447571	-3.19868	0.00138061	0.0200509	L1M3	L1	LINE	Down	NA	2cWT-2cKO	L1M3:L1:LINE	315.218	514.965	187.614	427.141	8.49518	162.115	401.462	439.931	672.809	134.953	685.498	348.341	1082.15	525.111	588.42	424.177	667.773	479.829	569.306	801.911	771.326	839.395	775.317	741.852	520.301	2738.34	523.357	326.884	157.969	733.375	407.547	683.23	482.652	476.822	618.948	174.971
Lx2A1:L1:LINE	184.481	-2.12494	0.67219	-3.16122	0.00157109	0.021871	Lx2A1	L1	LINE	Down	NA	2cWT-2cKO	Lx2A1:L1:LINE	103.516	8.31866	28.4533	148.375	55.2187	31.2332	35.4884	107.163	230.509	43.8597	363.967	17.3674	243.05	100.961	48.1251	83.1303	86.8379	128.963	113.327	138.873	146.106	48.7098	232.029	548.623	308.928	1820.52	98.0484	61.5957	174.006	285.97	54.3785	297.369	105.434	296.376	156.898	18.2262
L1MCb:L1:LINE	40.6682	-3.40191	1.08961	-3.12213	0.00179546	0.0239849	L1MCb	L1	LINE	Down	NA	2cWT-2cKO	L1MCb:L1:LINE	10.1181	0.396127	5.335	0	0	14.8729	2.21802	1.25336	20.1941	3.37382	1.63214	0	46.2952	8.7035	3.2353	146.011	2.19843	0	104.239	66.3039	45.5395	40.7803	108.941	45.5841	9.60782	233.033	34.4143	1.82958	16.0374	6.45739	42.3919	9.43316	0	26.2101	9.97232	430.138
L1MEj:L1:LINE	27.7921	-3.86489	1.25166	-3.08781	0.00201634	0.02589	L1MEj	L1	LINE	Down	NA	2cWT-2cKO	L1MEj:L1:LINE	3.11327	0.792254	0	17.9849	0	0	3.32703	0	10.8359	0	29.3785	20.8409	0	31.3326	20.625	13.855	2.74804	17.2911	1.60368	34.4571	17.0773	38.5148	210.1	219.853	52.4735	944.062	1.94798	4.87887	33.6786	0.922485	0.584715	0	0	77.6222	14.9585	0
L1M2a:L1:LINE	32.5335	-4.949	1.60821	-3.07734	0.00208856	0.0263971	L1M2a	L1	LINE	Down	8cWT-2cWT	2cWT-2cKO	L1M2a:L1:LINE	0	0	0	8.99243	0	1.48729	383.718	105.283	0	80.9717	0	0.496213	8.68035	0.580233	29.5221	0	14.8394	9.36603	0	0.522078	0	15.859	16.9778	22.5904	205.46	101.007	87.6591	0	0	26.7521	36.2523	6.73797	0	9.07272	30.9142	0
Lx8:L1:LINE	4203.01	-0.952808	0.310418	-3.06944	0.00214462	0.0267883	Lx8	L1	LINE	Down	8cWT-2cWT	2cWT-2cKO	Lx8:L1:LINE	1810.36	1952.11	2572.36	3808.3	3138.97	1418.88	3630.9	3770.75	5822.31	5209.18	4181.54	2761.92	7476.67	3190.7	3764.67	3680.11	4512.27	2841.51	4480.68	3541.25	4069.15	3730.27	4453.83	5046.12	3839.43	18520.1	2314.2	3803.08	2475.38	4004.51	3228.8	4468.62	2867.8	5063.59	5728.1	4640.39
L1ME3F:L1:LINE	37.081	-3.63923	1.18899	-3.06078	0.00220759	0.0272863	L1ME3F	L1	LINE	Down	NA	2cWT-2cKO	L1ME3F:L1:LINE	22.5712	0	1.77833	4.49622	0	0	78.7398	117.816	28.0748	0	4.89641	6.45077	0	0.580233	43.2721	31.4403	71.9985	19.4525	10.6912	39.1558	0.94874	141.598	24.7592	124.65	152.247	234.624	2.59731	39.6408	0	28.597	40.6377	70.5241	1.17149	0	28.5873	0
L1M4b:L1:LINE	411.664	-1.48882	0.490396	-3.03596	0.00239775	0.0289445	L1M4b	L1	LINE	Down	NA	2cWT-2cKO:8cKO-2cKO	L1M4b:L1:LINE	105.073	117.65	375.228	669.936	199.637	65.4409	296.106	261.953	199.971	23.6167	26.1142	97.7539	114.291	302.302	606.214	743.909	513.883	610.233	507.297	910.504	287.468	391.944	618.273	1040.77	220.241	2811.51	627.899	265.288	530.037	291.505	141.209	300.513	133.549	322.586	217.064	69.2595
Lx6:L1:LINE	1190.19	-1.19825	0.404898	-2.95938	0.00308256	0.0345389	Lx6	L1	LINE	Down	8cWT-2cWT	2cWT-2cKO	Lx6:L1:LINE	715.273	710.651	377.006	831.8	131.675	627.638	1112.34	1458.29	1218.05	334.008	1410.17	816.27	2041.33	1552.12	1131.95	1284.79	1000.83	1037.47	1582.83	821.75	1070.18	1584.77	1058.28	1262.64	829.968	5475.08	364.922	554.971	427.398	1993.49	1026.47	1366.46	617.373	1108.89	2212.52	1396.13
L1M:L1:LINE	28.1854	-3.41287	1.17446	-2.90591	0.00366192	0.0389208	L1M	L1	LINE	Down	NA	2cWT-2cKO	L1M:L1:LINE	15.5663	0	7.11333	0	0	0	4.43604	56.4014	82.2541	43.8597	0	0	0	53.9617	20.625	119.367	69.8001	3.60232	38.4883	46.987	0	43.0459	65.7888	17.3462	0.739063	116.119	67.53	17.6859	32.0749	0	8.18601	47.615	7.02891	6.04848	51.1912	0
Lx9:L1:LINE	3895.73	-0.882365	0.310616	-2.8407	0.0045015	0.0447391	Lx9	L1	LINE	Down	NA	2cWT-2cKO	Lx9:L1:LINE	1848.5	2628.7	1917.93	4995.3	2026.1	1438.21	2465.33	2726.07	4354.05	4240.89	2464.53	2514.31	6189.09	3429.76	3386.14	4304.12	4032.47	2993.53	4637.84	3844.58	3393.64	4040.65	4130.55	5749.25	3818	15633.1	2551.21	3409.72	2468.96	2771.14	3174.13	3452.98	2555.01	4502.09	5553.58	6736.4
L1MB8:L1:LINE	731.222	-1.05839	0.378691	-2.79486	0.00519226	0.0490964	L1MB8	L1	LINE	Down	NA	2cWT-2cKO	L1MB8:L1:LINE	458.428	497.535	620.638	831.8	25.4855	298.946	616.61	403.583	712.212	526.316	1129.44	668.399	624.985	620.27	553.64	1150.5	655.132	446.687	851.553	1136.04	660.323	678.54	968.439	884.655	904.614	3267.23	714.26	844.044	521.216	615.297	685.579	709.283	988.733	520.17	612.3	229.65
L1M1:L1:LINE	40.4005	-3.64777	1.3098	-2.78499	0.00535292	0.0499023	L1M1	L1	LINE	Down	NA	2cWT-2cKO	L1M1:L1:LINE	23.3495	1.98063	0	0	0	0	0	7.52018	19.7016	0	334.588	21.3371	1.44673	6.9628	173.897	6.92752	0.549607	0.720463	35.8155	30.8026	1.89748	27.1869	21.2222	117.389	0	341.994	26.6224	7.3183	60.1404	23.9846	81.5678	8.53476	2.34297	0	105.374	3.64524
L4_A_Mam:RTE-X:LINE	28.745	-5.5016	1.3094	-4.20163	2.65006e-05	0.00115227	L4_A_Mam	RTE-X	LINE	Down	8cWT-2cWT	2cWT-2cKO	L4_A_Mam:RTE-X:LINE	0	0.792254	0.889166	0	0	0	15.5262	1.25336	0.985079	188.934	189.328	18.8561	59.3157	62.6652	91.3972	68.2094	2.19843	2.88185	19.2441	0	5.69244	3.39836	7.78147	3.6306	11.086	111.347	57.1408	0	0.801872	1.84497	1.75415	103.316	7.02891	1.00808	17.2853	0
MER110A:ERV1:LTR	17.4503	-22.3987	2.50741	-8.93299	4.14651e-19	5.71458e-16	MER110A	ERV1	LTR	Down	8cWT-2cWT	2cWT-2cKO	MER110A:ERV1:LTR	0	0	0	0	0	0	0	8.77355	0	0	0	0	1.44673	0	0	110.307	52.7623	0	0	2.08831	0	0	158.459	0	0	152.704	0	0	0	0.922485	0.292358	0.898396	0	102.824	54.1829	0
MuRRS-int:ERV1:LTR	1022.67	-2.87345	0.422702	-6.79782	1.06217e-11	4.08515e-09	MuRRS-int	ERV1	LTR	Down	NA	2cWT-2cKO:8cWT-8cKO:8cKO-2cKO	MuRRS-int:ERV1:LTR	447.532	270.555	279.198	292.254	25.4855	269.2	198.513	157.297	191.598	47.2335	538.606	76.4168	118.631	304.623	1346.69	1094.55	1724.12	1495.68	2026.51	2006.34	1367.13	1947.26	2751.81	2980.32	1278.58	4783.14	1184.37	1982.04	1188.37	1476.9	654.881	203.487	338.559	456.66	397.895	612.4
RLTR4_Mm:ERV1:LTR	630.499	-2.00749	0.380316	-5.27848	1.30258e-07	1.56102e-05	RLTR4_Mm	ERV1	LTR	Down	8cWT-2cWT	2cWT-2cKO	RLTR4_Mm:ERV1:LTR	313.662	260.255	152.047	67.4433	76.4566	345.052	365.974	127.843	450.181	914.306	851.976	516.557	415.21	277.352	607.832	597.365	668.872	828.533	985.193	1130.3	750.454	539.207	1080.92	804.379	487.782	1307.53	525.305	846.484	1190.78	108.853	827.957	730.845	574.028	834.691	469.364	1818.97
RLTR24B_MM:ERV1:LTR	35.1228	-7.39934	1.51127	-4.89609	9.77605e-07	8.15265e-05	RLTR24B_MM	ERV1	LTR	Down	8cWT-2cWT	2cWT-2cKO	RLTR24B_MM:ERV1:LTR	0	0	0	0	0	1.48729	5.54506	0	51.2241	0	0	0.496213	54.9756	10.4442	3.63971	82.5974	48.3654	64.1213	7.48383	0.522078	0	66.8344	53.0555	14.5224	110.86	489.926	44.1542	1.82958	0	1.84497	1.46179	101.519	2.34297	78.6303	1.66205	0
RLTR1B:ERV1:LTR	477.829	-2.34487	0.529244	-4.4306	9.39702e-06	0.000521503	RLTR1B	ERV1	LTR	Down	8cWT-2cWT	2cWT-2cKO	RLTR1B:ERV1:LTR	21.7929	160.035	224.07	4.49622	135.923	20.8221	689.805	382.903	703.347	458.84	550.031	638.626	564.223	664.367	125.368	185.977	467.166	243.517	677.821	357.623	96.7715	354.562	398.27	636.161	252.021	2639.71	160.384	233.576	432.209	610.685	837.897	660.321	254.212	419.361	570.749	809.243
RLTR6-int:ERV1:LTR	7795.6	-1.43205	0.343202	-4.17263	3.01103e-05	0.00125745	RLTR6-int	ERV1	LTR	Down	NA	2cWT-2cKO:8cWT-8cKO:8cWT-2cWT:8cKO-2cKO	RLTR6-int:ERV1:LTR	7250.8	5114.79	6044.55	5723.68	5084.37	3466.88	693.132	334.022	1181.11	867.072	1612.55	500.679	1218.14	923.732	10084.4	21208.3	3898.36	11982	2479.29	16858.9	17313.6	17157.2	27459.4	14308.2	18150.7	11267.5	12298.9	21929.3	14098.5	1317.31	2641.74	3731.49	2259.79	5066.61	6255.63	2682.89
RLTR4_MM-int:ERV1:LTR	2792	-1.02739	0.260639	-3.94179	8.08746e-05	0.00261742	RLTR4_MM-int	ERV1	LTR	Down	NA	2cWT-2cKO:8cWT-8cKO	RLTR4_MM-int:ERV1:LTR	968.226	1716.81	1762.33	2436.95	2463.6	1505.14	2699.33	937.516	1445.6	2520.24	1041.3	1638.49	1494.47	1069.95	2487.54	1964.75	2308.35	2143.38	4485.49	4574.45	2702.01	4456.38	4536.6	4608.84	2646.59	7259.01	2589.52	5629.6	2824.99	3378.14	2459.6	3661.86	2798.68	3543.4	2153.69	3703.56
RLTR48B:ERV1:LTR	19.4735	-4.80638	1.26739	-3.79233	0.000149238	0.00417613	RLTR48B	ERV1	LTR	Down	NA	2cWT-2cKO	RLTR48B:ERV1:LTR	0	0	3.55666	0	0	1.48729	16.6352	31.3341	3.44778	10.1215	0	2.97728	0	0	16.5809	26.6443	29.6788	161.384	0	0	16.1286	69.1	3.53703	47.1977	1.47813	45.334	25.3237	0	10.4243	2.76745	90.6309	43.123	4.68594	41.3313	3.98893	3.64524
RLTR6B_Mm:ERV1:LTR	1612.03	-1.69328	0.451402	-3.75116	0.000176019	0.00474106	RLTR6B_Mm	ERV1	LTR	Down	NA	2cWT-2cKO:8cWT-8cKO:8cWT-2cWT:8cKO-2cKO	RLTR6B_Mm:ERV1:LTR	1408.75	996.655	1327.52	723.891	577.672	899.812	7.76308	70.8151	304.39	114.71	47.332	103.708	617.752	110.244	1926.22	5254.79	973.354	3992.09	970.225	2828.1	3479.98	2935.05	5525.55	2740.29	4807.61	2137.06	2862.88	4731.28	2861.08	343.164	412.224	581.262	292.871	582.67	1135.85	473.881
MMERGLN_LTR:ERV1:LTR	157.086	-2.81063	0.750006	-3.74747	0.000178624	0.00479559	MMERGLN_LTR	ERV1	LTR	Down	NA	2cWT-2cKO	MMERGLN_LTR:ERV1:LTR	133.87	5.14965	1.77833	13.4887	0	11.8983	155.262	28.8274	39.4032	273.28	4.89641	112.144	175.054	96.3188	62.2795	109.242	36.2741	144.093	94.0825	78.3117	32.2572	446.318	269.522	540.555	104.947	843.849	109.736	97.5773	24.858	67.3414	164.597	172.941	19.9152	160.285	229.696	688.95
RLTR6C_Mm:ERV1:LTR	50.9946	-3.92334	1.0491	-3.73974	0.000184213	0.00490582	RLTR6C_Mm	ERV1	LTR	Down	NA	2cWT-2cKO	RLTR6C_Mm:ERV1:LTR	24.9061	8.31866	0	4.49622	0	0	0	0	63.5376	0	0	0	1.44673	4.06163	46.9118	57.0188	0.549607	205.332	14.4331	219.795	70.2068	117.81	162.703	39.1298	320.014	77.1474	124.671	10.3676	45.7067	62.729	47.9466	32.3422	37.4875	7.05656	47.8671	32.8071
MER92B:ERV1:LTR	17.6351	-6.05312	1.65608	-3.6551	0.000257083	0.00615287	MER92B	ERV1	LTR	Down	NA	2cWT-2cKO	MER92B:ERV1:LTR	0	0.792254	0	4.49622	0	0	1.10901	0	0.49254	0	0	12.4053	0	0	0	0	0.549607	0.720463	86.0641	99.7169	135.67	61.1705	25.4666	2.8238	75.3845	4.772	0	35.3718	69.7628	0	0.584715	34.139	0	1.00808	0	0
RLTR1:ERV1:LTR	28.33	-4.98998	1.39454	-3.57822	0.000345948	0.00761824	RLTR1	ERV1	LTR	Down	NA	2cWT-2cKO	RLTR1:ERV1:LTR	4.6699	0.396127	2.6675	0	0	0	66.5407	0	0	0	0	2.48106	0	0.580233	6.06619	95.3866	0	128.963	31.539	16.7065	85.3866	1.13279	55.1777	92.3785	11.825	85.1007	67.53	71.9633	0	1.84497	91.2156	20.6631	0	27.2182	80.7758	0
RodERV21-int:ERV1:LTR	635.248	-1.65571	0.516557	-3.20529	0.00134926	0.019782	RodERV21-int	ERV1	LTR	Down	NA	2cWT-2cKO	RodERV21-int:ERV1:LTR	734.731	341.857	580.625	98.9168	25.4855	104.111	138.626	340.288	357.584	320.513	174.639	465.944	703.108	344.078	867.869	538.748	787.587	1036.03	1438.5	883.356	674.554	914.159	1531.53	1346.14	419.049	2511.67	890.877	617.177	483.529	526.739	528.29	751.059	53.8883	611.905	962.993	390.04
MMERGLN-int:ERV1:LTR	2002.28	-1.4896	0.476473	-3.12631	0.00177013	0.0237232	MMERGLN-int	ERV1	LTR	Down	NA	2cWT-2cKO	MMERGLN-int:ERV1:LTR	1108.32	652.817	453.475	49.4584	263.351	1952.82	2090.49	591.588	832.392	5111.34	1408.54	2433.92	706.002	1177.87	1107.28	1308.77	998.636	1312.68	3884.64	2789.98	1433.55	2493.26	2383.96	2811.69	805.579	6351.54	809.711	2274.16	755.363	1938.14	3249.26	2341.67	2607.73	4004.1	3059.17	2088.72
RMER2:ERV1:LTR	474.213	-1.43833	0.469411	-3.06412	0.00218315	0.0271239	RMER2	ERV1	LTR	Down	NA	2cWT-2cKO:8cKO-2cKO	RMER2:ERV1:LTR	287.977	125.572	212.511	332.72	615.901	74.3647	280.58	308.954	364.479	26.9906	208.914	128.519	525.161	209.464	998.494	806.257	312.177	540.348	211.151	341.961	944.945	730.648	776.025	719.261	488.521	2986.48	316.222	563.509	367.257	159.59	149.979	326.118	370.189	131.05	453.408	575.947
RLTR30B_MM:ERV1:LTR	51.1546	-2.53278	0.860262	-2.9442	0.00323795	0.0357472	RLTR30B_MM	ERV1	LTR	Down	NA	2cWT-2cKO	RLTR30B_MM:ERV1:LTR	0	43.9701	21.34	8.99243	0	0	166.352	16.2937	2.95524	0	135.467	11.4129	95.4839	55.7024	38.8236	114.571	55.5103	178.675	96.7553	96.5844	94.874	10.1951	20.5148	28.238	7.39063	202.015	23.3758	87.8196	72.9703	1.84497	48.8237	30.0963	35.1446	72.5818	9.97232	0
LTR37B:ERV1:LTR	15.9297	-6.59646	2.24491	-2.9384	0.0032991	0.0360333	LTR37B	ERV1	LTR	Down	NA	2cWT-2cKO	LTR37B:ERV1:LTR	0	0	0	0	0	0	0	0.626682	32.0151	0	0	0.496213	14.4673	44.678	44.0809	0	0	0	36.35	0	0	107.615	0	109.321	0	50.106	0	45.1295	0	0	54.0862	0.898396	0	0	49.5292	0
MuRRS4-int:ERV1:LTR	614.999	-1.00509	0.345147	-2.91205	0.0035906	0.0383353	MuRRS4-int	ERV1	LTR	Down	8cKO-2cKO	2cWT-2cKO:8cWT-8cKO	MuRRS4-int:ERV1:LTR	294.204	285.211	352.999	386.675	25.4855	351.001	515.69	360.969	232.479	472.335	564.72	322.538	828.973	423.57	436.765	864.874	357.794	645.535	352.809	277.223	294.109	703.461	755.51	890.303	654.81	1356.84	237.004	475.69	237.354	963.997	1251	1114.01	1281.6	1087.72	1231.58	871.212
LTRIS4A:ERV1:LTR	20.9938	-5.09891	1.80794	-2.82029	0.004798	0.0467192	LTRIS4A	ERV1	LTR	Down	NA	2cWT-2cKO	LTRIS4A:ERV1:LTR	0	0	0	8.99243	0	0	0	46.3745	0.49254	0	0	21.3371	73.783	0.580233	0	0.532886	131.356	29.539	0.534559	56.9065	0	23.7885	0	6.05099	0	0.795334	1.94798	0	95.4227	3.68994	116.358	138.802	0	19.1535	0.332411	0
RLTR1D2_MM:ERV1:LTR	17.9304	-4.05174	1.45107	-2.79225	0.00523421	0.0492677	RLTR1D2_MM	ERV1	LTR	Down	NA	2cWT-2cKO	RLTR1D2_MM:ERV1:LTR	0	10.2993	0	0	0	0	4.43604	16.2937	0.49254	0	0	40.6894	1.44673	14.5058	0.404412	0	2.19843	0	1.60368	4.17662	82.5404	2.26557	0	68.1745	28.8235	201.22	0.649327	7.3183	108.253	0.922485	22.2192	30.0963	11.7149	2.01616	0.664821	0
IAPLTR2a:ERVK:LTR	596.936	-2.76971	0.413701	-6.69494	2.15755e-11	7.92922e-09	IAPLTR2a	ERVK	LTR	Down	NA	2cWT-2cKO:8cWT-8cKO	IAPLTR2a:ERVK:LTR	228.047	130.722	224.07	22.4811	72.209	110.06	8.87209	129.723	133.478	43.8597	29.3785	20.8409	164.927	39.4559	856.95	880.328	826.06	777.38	1239.11	1614.79	948.74	659.282	442.129	1205.36	629.682	997.349	896.071	879.416	789.042	906.802	516.596	478.845	857.527	974.814	560.777	678.014
ERVB4_1C-LTR_Mm:ERVK:LTR	77.5903	-5.87473	0.984789	-5.96546	2.43941e-09	5.23934e-07	ERVB4_1C-LTR_Mm	ERVK	LTR	Down	8cWT-2cWT	2cWT-2cKO	ERVB4_1C-LTR_Mm:ERVK:LTR	1.55663	6.73415	1.77833	0	0	0	2.21802	10.6536	44.3286	232.794	6.52855	11.9091	72.3363	65.5664	78.0516	115.636	151.142	99.424	107.981	236.501	40.7958	0	119.552	37.9196	0	585.366	161.033	45.7394	123.488	50.7367	75.1359	64.2353	8.2004	16.1293	23.9336	18.2262
IAPLTR1a_Mm:ERVK:LTR	954.4	-2.27428	0.38326	-5.93403	2.95583e-09	6.18778e-07	IAPLTR1a_Mm	ERVK	LTR	Down	NA	2cWT-2cKO:8cWT-8cKO	IAPLTR1a_Mm:ERVK:LTR	118.304	340.273	255.191	553.035	225.122	255.814	557.833	109.669	209.329	337.382	42.4356	97.7539	607.625	139.256	942.685	913.9	1402.6	719.023	1737.85	1115.68	1002.82	1455.63	2227.62	2229.99	1869.83	2012.99	963.601	1668.57	780.221	1011.04	1816.42	1334.12	1046.14	1269.17	551.801	991.505
ETnERV-int:ERVK:LTR	711.003	-2.7164	0.470848	-5.76918	7.96603e-09	1.35466e-06	ETnERV-int	ERVK	LTR	Down	8cWT-2cWT	2cWT-2cKO	ETnERV-int:ERVK:LTR	91.8413	240.449	42.68	274.269	182.646	105.598	251.746	434.917	408.315	914.306	855.24	503.16	979.433	1074.59	298.052	710.87	934.332	792.51	842.466	777.374	424.087	787.287	1216.74	1330.82	430.874	5474.28	438.945	494.595	350.418	501.832	830.003	313.989	222.582	1079.65	749.253	404.621
RLTR10:ERVK:LTR	3904.63	-2.12937	0.377662	-5.63828	1.71752e-08	2.70518e-06	RLTR10	ERVK	LTR	Down	NA	2cWT-2cKO:8cWT-8cKO	RLTR10:ERVK:LTR	881.054	1223.64	657.094	2495.4	1597.09	1851.68	594.43	637.336	1412.6	1339.41	1098.43	1181.98	1383.07	923.151	3744.86	4848.2	3504.84	1501.45	3747.8	9631.29	4316.77	7701.82	7538.12	9406.47	5819.38	11153	4959.56	11707.5	5526.5	2324.66	1360.63	3934.07	1900.15	4330.71	1358.23	5482.44
RLTR10-int:ERVK:LTR	12879.5	-2.09053	0.372936	-5.60559	2.07544e-08	3.20781e-06	RLTR10-int	ERVK	LTR	Down	NA	2cWT-2cKO:8cWT-8cKO:8cKO-2cKO	RLTR10-int:ERVK:LTR	3594.27	3914.13	1797	8911.5	6269.44	6103.85	1858.7	2018.54	3437.93	7064.78	3538.48	3534.03	3524.22	3171.56	15934.3	14003.7	12569	4695.26	10448.5	36173.2	13456	26703.2	25506.2	34415.6	18614	34704.4	17250	41072.1	20027.5	5205.58	5814.41	12395.6	8589.33	12567.7	5171.31	13042.7
IAPLTR1_Mm:ERVK:LTR	671.531	-2.39291	0.43207	-5.53824	3.05525e-08	4.39372e-06	IAPLTR1_Mm	ERVK	LTR	Down	8cWT-2cWT	2cWT-2cKO	IAPLTR1_Mm:ERVK:LTR	183.683	118.442	68.4658	80.9319	59.4663	361.412	533.434	716.298	412.256	1339.41	88.1355	398.459	448.485	488.557	556.067	432.704	1408.64	344.382	848.346	1019.1	601.501	445.185	672.036	1156.95	227.632	2095.71	437.646	611.688	681.591	1096.83	1514.7	1383.08	955.932	716.745	758.893	204.133
IAP-d-int:ERVK:LTR	246.678	-2.8544	0.548258	-5.2063	1.92643e-07	2.11209e-05	IAP-d-int	ERVK	LTR	Down	NA	2cWT-2cKO:8cWT-8cKO	IAP-d-int:ERVK:LTR	143.989	53.081	39.1233	44.9622	4.24759	25.284	144.171	85.8554	92.1049	20.2429	4.89641	101.724	125.865	138.676	296.03	358.632	489.7	263.69	183.888	357.101	310.238	289.994	334.603	363.463	142.639	1555.67	236.355	279.315	268.627	353.312	289.434	278.503	99.5762	250.004	584.378	7.29047
ETnERV3-int:ERVK:LTR	1469.65	-2.48547	0.517144	-4.80615	1.53863e-06	0.000115139	ETnERV3-int	ERVK	LTR	Down	8cWT-2cWT:8cKO-2cKO	2cWT-2cKO:8cWT-8cKO	ETnERV3-int:ERVK:LTR	123.752	30.1056	22.2291	49.4584	33.9807	35.695	916.043	707.524	376.793	4224.02	4095.03	679.811	545.415	1225.45	262.059	216.885	292.391	227.666	220.238	125.299	256.16	108.748	122.381	261.403	461.915	1041.89	73.3739	74.4027	416.973	3665.95	3926.95	3951.14	2697.93	5759.16	8327.22	965.988
IAPEY3-int:ERVK:LTR	736.075	-2.25341	0.482545	-4.66985	3.01423e-06	0.000203466	IAPEY3-int	ERVK	LTR	Down	NA	2cWT-2cKO:8cWT-8cKO	IAPEY3-int:ERVK:LTR	421.069	259.067	58.6849	481.095	12.7428	142.78	293.888	202.418	243.315	165.317	48.9641	202.455	380.489	57.4431	664.449	552.603	833.204	630.406	1098.52	1215.92	996.177	1382	1517.39	1414.32	356.229	3959.17	363.623	1083.72	319.145	613.452	639.971	574.075	902.043	1593.78	1232.25	1381.54
RMER13A:ERVK:LTR	170.179	-3.04037	0.651969	-4.66336	3.11084e-06	0.000208288	RMER13A	ERVK	LTR	Down	8cWT-2cWT	2cWT-2cKO:8cKO-2cKO	RMER13A:ERVK:LTR	72.3834	41.1972	2.6675	0	8.49518	58.0044	349.339	146.017	182.24	566.802	208.914	15.8788	241.603	40.0361	247.5	138.018	152.791	335.736	316.459	42.2883	106.259	271.869	150.678	341.276	189.939	1108.7	101.944	233.576	145.941	37.8219	42.0995	204.834	42.1735	56.4525	85.7619	10.9357
RMER6BA:ERVK:LTR	119.598	-2.88571	0.62169	-4.64172	3.45525e-06	0.000226758	RMER6BA	ERVK	LTR	Down	8cWT-2cWT	2cWT-2cKO:8cKO-2cKO	RMER6BA:ERVK:LTR	10.1181	47.5352	72.9116	0	4.24759	1.48729	53.2325	113.429	171.896	43.8597	257.878	193.027	117.185	137.515	194.522	79.4	80.2426	134.006	119.207	72.0467	127.131	112.146	195.244	239.216	279.366	676.829	77.2699	151.855	131.507	88.5585	84.4914	26.0535	17.5723	125.002	181.829	7.29047
RLTR22_Mur:ERVK:LTR	272.425	-2.63791	0.571833	-4.61308	3.96743e-06	0.000253334	RLTR22_Mur	ERVK	LTR	Down	NA	2cWT-2cKO	RLTR22_Mur:ERVK:LTR	147.102	97.4472	16.8942	22.4811	21.238	22.3094	36.5974	181.111	227.553	253.037	48.9641	62.5228	289.345	34.814	1056.73	286.693	102.227	227.666	81.253	418.184	129.029	517.684	602.003	200.086	101.252	1119.83	220.122	35.9816	109.055	345.009	271.016	362.053	339.731	394.159	443.103	473.881
RLTR25A:ERVK:LTR	416.517	-1.56949	0.345106	-4.54786	5.4195e-06	0.000334432	RLTR25A	ERVK	LTR	Down	8cWT-2cWT	2cWT-2cKO:8cKO-2cKO	RLTR25A:ERVK:LTR	25.6844	303.829	421.465	58.4508	131.675	240.942	247.309	300.181	525.54	465.587	370.495	272.421	587.37	454.323	470.736	430.039	511.135	730.55	484.311	495.974	661.272	406.671	352.288	670.853	565.383	1313.1	369.467	817.21	598.998	221.396	250.843	334.203	318.644	444.563	158.56	160.39
IAPLTR2a2_Mm:ERVK:LTR	722.238	-1.78705	0.399377	-4.47459	7.65575e-06	0.000450572	IAPLTR2a2_Mm	ERVK	LTR	Down	NA	2cWT-2cKO	IAPLTR2a2_Mm:ERVK:LTR	317.553	202.025	297.871	148.375	556.434	426.853	428.078	226.232	439.345	560.054	58.757	136.955	319.726	393.398	634.927	782.277	973.904	355.909	897.525	1254.55	670.759	1596.1	1093.65	2302.2	625.987	1792.68	818.152	2253.43	742.533	567.328	440.875	761.84	139.407	910.297	581.386	1552.87
IAPEz-int:ERVK:LTR	45846.1	-1.53591	0.348028	-4.41318	1.01864e-05	0.000552339	IAPEz-int	ERVK	LTR	Down	NA	2cWT-2cKO:8cWT-8cKO	IAPEz-int:ERVK:LTR	8384.8	15283.8	12340.7	33780.1	24746.5	19126.6	24570.1	22521.1	17147.8	78819.2	19820.7	12497.1	21870.1	21786	32687	35544	52064.3	18000.8	68322	55280.2	30005.8	54449.7	69552.9	75356.2	36868.9	128671	40138.8	74216.1	52695.8	83818.8	97673.5	61055	44381.7	57507	31223.7	51718.6
RLTR51A_Mm:ERVK:LTR	393.661	-2.11467	0.491953	-4.29853	1.71933e-05	0.000813091	RLTR51A_Mm	ERVK	LTR	Down	NA	2cWT-2cKO:8cKO-2cKO	RLTR51A_Mm:ERVK:LTR	163.446	99.4278	197.395	449.622	4.24759	38.6696	235.11	235.006	132.986	138.327	68.5498	132.985	208.328	322.03	734.413	505.709	778.793	634.728	723.794	873.436	290.315	630.962	325.407	796.311	933.437	1623.28	519.462	508.012	372.87	116.233	235.056	307.701	358.474	319.561	502.605	32.8071
RLTR17C_Mm:ERVK:LTR	28.3462	-4.64861	1.08712	-4.27609	1.90205e-05	0.000868952	RLTR17C_Mm	ERVK	LTR	Down	8cWT-2cWT	2cWT-2cKO	RLTR17C_Mm:ERVK:LTR	0	0.792254	4.44583	4.49622	0	1.48729	8.87209	41.361	2.4627	0	4.89641	36.7197	2.89345	27.271	9.30148	65.0121	38.4725	5.76371	6.41471	1.04416	0.94874	6.79672	41.0296	31.0618	22.911	272.8	24.6744	132.339	4.00936	74.7213	92.0926	4.49198	63.2602	1.00808	14.9585	0
MMERVK9E_I-int:ERVK:LTR	893.951	-1.72488	0.411096	-4.1958	2.71906e-05	0.00117409	MMERVK9E_I-int	ERVK	LTR	Down	NA	2cWT-2cKO:8cWT-8cKO	MMERVK9E_I-int:ERVK:LTR	247.505	251.144	423.243	687.921	29.7331	187.399	485.747	243.153	505.838	1572.2	406.402	531.94	523.714	362.066	604.596	473.203	711.741	1314.85	1061.64	1302.06	629.015	601.51	942.973	1028.67	721.326	3888.39	707.766	589.733	488.34	1226.9	1228.19	1647.66	1262.86	2067.57	1194.35	1592.97
MLTR31F_MM:ERVK:LTR	42.8814	-4.44224	1.05959	-4.19242	2.75989e-05	0.00118862	MLTR31F_MM	ERVK	LTR	Down	8cWT-2cWT	2cWT-2cKO	MLTR31F_MM:ERVK:LTR	3.89158	1.18838	5.335	4.49622	0	0	2.21802	27.574	70.9257	151.822	0	1.98485	172.16	3.4814	31.1398	5.32886	2.19843	0.720463	327.685	8.87532	104.361	9.0623	8.48888	114.969	123.424	49.3107	0.649327	7.3183	34.4805	83.0236	65.4881	69.6257	12.8863	39.3151	19.9446	7.29047
IAPEY4_I-int:ERVK:LTR	487.345	-2.46132	0.587827	-4.18716	2.82471e-05	0.00120711	IAPEY4_I-int	ERVK	LTR	Down	8cWT-2cWT:8cKO-2cKO	2cWT-2cKO	IAPEY4_I-int:ERVK:LTR	181.348	202.025	22.2291	8.99243	25.4855	13.3856	94.2659	163.564	277.792	1390.01	22.8499	330.478	160.586	214.106	279.449	421.513	126.41	254.324	406.265	374.852	323.52	480.302	218.589	191.211	677.721	1451.48	125.969	808.062	232.543	1526.71	690.549	1105.93	320.987	987.919	1947.59	776.436
ERVB7_2B-LTR_MM:ERVK:LTR	175.77	-2.60105	0.639649	-4.06637	4.7752e-05	0.00177068	ERVB7_2B-LTR_MM	ERVK	LTR	Down	NA	2cWT-2cKO	ERVB7_2B-LTR_MM:ERVK:LTR	60.7087	11.8838	63.1308	4.49622	0	120.471	4.43604	161.057	45.8062	249.663	40.8035	8.93183	143.226	87.6153	207.868	366.093	273.155	484.872	114.93	173.33	85.3866	160.856	582.903	318.282	276.41	446.182	166.877	259.19	123.488	41.5118	71.3353	62.4385	99.5762	228.834	302.161	25.5167
RLTR19B:ERVK:LTR	40.4884	-5.4466	1.35406	-4.02244	5.75995e-05	0.00202246	RLTR19B	ERVK	LTR	Down	NA	2cWT-2cKO	RLTR19B:ERVK:LTR	0.778316	1.18838	1.77833	0	0	5.94917	0	85.8554	4.9254	0	0	0.992425	1.44673	0	183.603	173.721	2.74804	92.9398	28.3317	0	0.94874	84.959	0	12.9088	110.12	369.035	59.7381	1.21972	60.1404	1.84497	12.8637	31.893	0	103.832	5.98339	58.3238
ERVB4_1B-I_MM-int:ERVK:LTR	369.488	-1.68313	0.422396	-3.98472	6.75599e-05	0.00228022	ERVB4_1B-I_MM-int	ERVK	LTR	Down	8cWT-2cWT	2cWT-2cKO	ERVB4_1B-I_MM-int:ERVK:LTR	115.969	98.6356	213.4	0	21.238	252.84	174.115	255.686	516.182	840.081	207.282	537.398	312.493	396.88	417.354	245.128	235.232	521.616	209.547	327.865	188.799	559.597	265.985	665.609	259.411	666.49	345.442	313.467	529.235	472.312	566.004	387.209	442.821	727.834	592.356	127.583
RMER17B2:ERVK:LTR	88.5493	-2.90908	0.732946	-3.96903	7.21666e-05	0.00239282	RMER17B2	ERVK	LTR	Down	8cWT-2cWT	2cWT-2cKO	RMER17B2:ERVK:LTR	27.2411	15.0528	9.78082	8.99243	16.9904	17.8475	22.1802	61.4148	213.762	40.4859	31.0106	52.5985	49.1887	93.9978	279.449	12.2564	192.912	94.3807	39.0228	30.8026	0.94874	175.582	4.24444	196.859	87.9485	560.711	25.3237	43.9098	76.9797	265.676	98.2322	121.733	2.34297	102.824	34.5707	25.5167
RMER6B:ERVK:LTR	432.33	-1.65893	0.421927	-3.9318	8.43121e-05	0.00270224	RMER6B	ERVK	LTR	Down	8cWT-2cWT	2cWT-2cKO:8cKO-2cKO	RMER6B:ERVK:LTR	182.126	300.66	118.259	17.9849	267.598	227.556	316.068	413.61	490.57	576.923	179.535	400.444	808.719	373.67	402.795	588.306	261.063	646.256	744.107	1034.24	462.037	417.998	504.381	419.536	373.227	1949.36	378.558	340.911	314.334	343.164	411.64	254.246	283.499	646.18	361.663	153.1
RLTR44-int:ERVK:LTR	145.575	-3.00236	0.782033	-3.83918	0.000123448	0.00366714	RLTR44-int	ERVK	LTR	Down	NA	2cWT-2cKO:8cKO-2cKO	RLTR44-int:ERVK:LTR	35.0242	1.18838	12.4483	17.9849	4.24759	165.09	3.32703	13.1603	90.1348	6.74764	0	0.992425	13.0205	2.90117	159.338	205.161	212.148	30.9799	497.14	385.815	70.2068	851.856	253.959	494.971	192.896	417.55	352.585	341.521	298.296	66.4189	47.9466	90.2888	16.4008	28.2263	2.65928	3.64524
SRV_MM-int:ERVK:LTR	67.8327	-4.31806	1.13273	-3.81208	0.0001378	0.00397028	SRV_MM-int	ERVK	LTR	Down	NA	2cWT-2cKO	SRV_MM-int:ERVK:LTR	26.4628	9.11092	0	4.49622	0	0	0	50.7612	0	3.37382	11.425	0	50.6354	0	85.7354	105.511	170.378	90.7784	385.417	58.4727	191.646	48.7098	154.922	160.15	192.896	318.929	54.5435	64.645	11.2262	208.482	0.584715	13.9251	2.34297	1.00808	33.2411	0
MYSERV6-int:ERVK:LTR	1166.39	-1.10092	0.290435	-3.79061	0.000150278	0.00419105	MYSERV6-int	ERVK	LTR	Down	NA	2cWT-2cKO:8cKO-2cKO	MYSERV6-int:ERVK:LTR	638.998	846.523	398.346	1299.41	925.975	710.926	694.241	294.541	878.198	563.428	709.98	510.107	684.301	526.272	1673.86	1737.74	2232.5	1237.04	3002.09	2156.7	1034.13	1693.52	1587.42	1788.67	1355.44	3338.02	772.699	1618.56	535.65	689.096	692.595	915.914	1043.79	1307.48	487.314	1625.78
RLTR44D:ERVK:LTR	27.6595	-4.07952	1.07808	-3.78407	0.000154284	0.0042883	RLTR44D	ERVK	LTR	Down	NA	2cWT-2cKO:8cKO-2cKO	RLTR44D:ERVK:LTR	7.00485	0	9.78082	0	0	1.48729	24.3982	0	2.95524	0	3.26428	20.8409	0	0	64.3016	59.1504	45.0678	0.720463	28.3317	95.5402	58.8219	46.4443	150.678	55.6691	8.1297	159.067	0	85.99	1.60374	0.922485	23.0963	6.73797	35.1446	1.00808	15.6233	3.64524
RLTR13C1:ERVK:LTR	24.299	-6.81762	1.80908	-3.76856	0.000164191	0.00451062	RLTR13C1	ERVK	LTR	Down	8cWT-2cWT	2cWT-2cKO	RLTR13C1:ERVK:LTR	0	0	0	0	0	0	4.43604	52.0146	89.1497	0	0	0	0	7.54304	19.8162	24.5128	1.09921	1.44093	0.534559	0.522078	152.747	0	0	24.204	0	213.15	17.5318	0	0	1.84497	41.2224	60.6417	144.093	1.00808	41.5513	0
ERVB2_1A-I_MM-int:ERVK:LTR	93.0135	-3.23378	0.869644	-3.71851	0.000200401	0.00519601	ERVB2_1A-I_MM-int	ERVK	LTR	Down	8cWT-2cWT:8cKO-2cKO	2cWT-2cKO:8cWT-8cKO	ERVB2_1A-I_MM-int:ERVK:LTR	17.9013	1.98063	1.77833	4.49622	0	0	4.43604	70.1884	91.6124	43.8597	78.3426	48.6288	10.1271	97.4792	20.2206	162.53	112.12	10.0865	1.60368	28.7143	0.94874	37.382	0.707406	62.9303	77.6017	87.4867	3.89596	54.8873	0	83.0236	250.55	379.572	234.297	390.127	282.549	513.978
RLTR22_Mus:ERVK:LTR	79.5341	-3.09068	0.836309	-3.69562	0.000219351	0.00555532	RLTR22_Mus	ERVK	LTR	Down	NA	2cWT-2cKO	RLTR22_Mus:ERVK:LTR	2.33495	70.9067	0.889166	13.4887	4.24759	0	5.54506	1.88005	50.7316	0	89.7676	39.697	53.5288	85.8746	416.14	44.2296	91.2348	117.436	31.539	6.78701	1.89748	33.9836	178.974	49.6181	189.2	435.843	228.563	98.1872	105.847	9.22485	51.4549	74.5668	50.3739	125.002	109.031	10.9357
RLTR26B_MM:ERVK:LTR	72.4247	-2.64705	0.717812	-3.68767	0.00022632	0.00567532	RLTR26B_MM	ERVK	LTR	Down	NA	2cWT-2cKO	RLTR26B_MM:ERVK:LTR	21.7929	29.3134	42.68	4.49622	4.24759	5.94917	21.0712	92.1223	207.359	0	55.4927	7.44319	13.0205	26.1105	29.9265	33.5718	51.6631	212.537	169.455	60.0389	12.3336	149.528	113.892	124.65	38.4313	325.292	106.49	131.12	219.713	84.8686	136.239	64.6845	26.9442	7.05656	46.5375	3.64524
MLTR18A_MM:ERVK:LTR	11.4655	-4.83722	1.31367	-3.68221	0.000231223	0.00574169	MLTR18A_MM	ERVK	LTR	Down	8cWT-2cWT	2cWT-2cKO:8cKO-2cKO	MLTR18A_MM:ERVK:LTR	0.778316	0.396127	0.889166	0	0	0	0	31.3341	3.44778	3.37382	0	43.6667	27.4878	34.814	10.5147	0	42.3198	0.720463	7.48383	10.4416	0.94874	121.208	0.707406	20.5734	32.5188	5.56734	0	3.65915	9.62246	0.922485	1.16943	1.34759	0	0	8.31026	0
RMER13B:ERVK:LTR	191.752	-2.39778	0.665806	-3.60131	0.000316616	0.00718272	RMER13B	ERVK	LTR	Down	8cWT-2cWT	2cWT-2cKO	RMER13B:ERVK:LTR	7.78316	5.14965	194.727	26.9773	38.2283	10.4111	43.2514	97.1357	289.613	259.784	9.79283	135.962	478.866	255.303	262.868	69.2752	283.048	537.466	251.778	177.506	19.9235	482.567	307.014	163.377	178.114	745.228	130.515	104.896	48.1123	20.2947	68.4117	254.246	64.4317	212.705	201.108	116.648
RLTR26:ERVK:LTR	52.2158	-3.95191	1.09829	-3.59823	0.000320392	0.00723533	RLTR26	ERVK	LTR	Down	8cWT-2cWT	2cWT-2cKO	RLTR26:ERVK:LTR	9.3398	0.396127	0	4.49622	0	0	5.54506	47.6278	77.3287	97.8408	83.2391	12.4053	208.328	29.0117	45.6986	17.5852	55.5103	5.04324	0.534559	42.8104	0	5.66394	166.24	16.9428	1.47813	48.5154	147.397	2.43943	4.81123	270.288	22.2192	107.358	7.02891	2.01616	131.635	0
RLTR42:ERVK:LTR	11.7879	-6.36873	1.77275	-3.59256	0.000327439	0.00734761	RLTR42	ERVK	LTR	Down	8cWT-2cWT	2cWT-2cKO	RLTR42:ERVK:LTR	0	0	0	0	0	0	1.10901	20.6805	0	3.37382	0	51.1099	5.7869	0	5.25736	28.243	48.915	52.5938	6.94927	5.74286	0	0	2.12222	79.8731	41.3875	62.0361	0	0	0	0	0	1.34759	0	1.00808	18.615	0
RLTR10A:ERVK:LTR	162.894	-2.33203	0.651408	-3.57998	0.000343619	0.00758773	RLTR10A	ERVK	LTR	Down	NA	2cWT-2cKO	RLTR10A:ERVK:LTR	187.574	58.2306	19.5616	22.4811	0	13.3856	256.182	70.1884	14.2837	246.289	40.8035	5.45834	292.238	16.8268	303.714	248.325	263.262	360.952	235.741	372.241	69.258	429.326	222.833	194.439	99.7736	535.26	147.397	120.752	273.438	47.9692	31.5746	234.481	45.6879	13.105	171.524	131.229
RLTR13D1:ERVK:LTR	25.9791	-4.97189	1.3919	-3.57203	0.000354228	0.00774898	RLTR13D1	ERVK	LTR	Down	8cWT-2cWT	2cWT-2cKO	RLTR13D1:ERVK:LTR	5.44822	0	0.889166	0	0	0	1.10901	70.1884	1.47762	40.4859	0	3.9697	11.5738	63.2455	99.081	2.66443	1.09921	0	0	114.335	29.4109	73.6312	2.82963	9.68159	0	234.624	0	47.569	19.2449	0	12.5714	11.2299	1.17149	63.5091	29.2521	10.9357
RMER19A:ERVK:LTR	513.267	-1.37353	0.386038	-3.55802	0.000373663	0.0080151	RMER19A	ERVK	LTR	Down	NA	2cWT-2cKO:8cWT-8cKO	RMER19A:ERVK:LTR	433.522	189.349	205.397	503.576	263.351	278.124	301.651	57.6547	264.494	37.112	39.1713	202.455	96.9306	234.995	632.501	505.176	471.563	645.535	605.121	918.335	785.557	785.022	618.981	565.97	773.799	2991.25	479.203	682.432	639.092	255.528	294.404	504.898	591.6	609.889	389.585	411.912
RLTR12BD_Mm:ERVK:LTR	94.9631	-2.23512	0.666175	-3.35516	0.00079319	0.0138666	RLTR12BD_Mm	ERVK	LTR	Down	8cWT-2cWT	2cWT-2cKO	RLTR12BD_Mm:ERVK:LTR	23.3495	0.396127	2.6675	49.4584	29.7331	52.0553	158.589	69.5617	63.5376	357.625	16.3214	157.796	52.0821	21.4686	162.574	71.9396	195.111	54.7552	96.7553	27.6701	56.9244	178.98	61.5444	175.479	22.911	498.674	112.983	45.1295	34.4805	13.8373	30.6975	197.198	151.122	105.848	32.9086	43.7428
RLTR43C:ERVK:LTR	30.8139	-5.3614	1.59923	-3.35249	0.000800892	0.0139186	RLTR43C	ERVK	LTR	Down	NA	2cWT-2cKO	RLTR43C:ERVK:LTR	3.89158	0	0.889166	4.49622	0	0	0	0	0	0	0	0.992425	1.44673	135.194	0.808825	0.532886	0.549607	84.2942	40.6265	0.522078	0	0	139.359	15.7326	95.3392	456.522	0.649327	2.43943	52.1216	0.922485	0.584715	65.1337	1.17149	31.2505	0.997232	3.64524
RLTR19C:ERVK:LTR	22.4959	-3.88111	1.1581	-3.35128	0.00080439	0.0139591	RLTR19C	ERVK	LTR	Down	NA	2cWT-2cKO	RLTR19C:ERVK:LTR	2.33495	2.77289	1.77833	4.49622	4.24759	0	2.21802	31.3341	0.49254	0	0	5.45834	10.1271	1.7407	0.404412	52.2228	18.137	0	14.4331	62.1273	0	180.113	9.19628	10.8918	85.7313	48.5154	1.94798	3.04929	47.3104	10.1473	9.35544	5.83957	141.75	2.01616	62.1608	0
RLTR31A_Mm:ERVK:LTR	8.24687	-4.70186	1.40329	-3.3506	0.000806369	0.0139787	RLTR31A_Mm	ERVK	LTR	Down	NA	2cWT-2cKO	RLTR31A_Mm:ERVK:LTR	0	0.792254	0.889166	0	0	0	1.10901	0.626682	0	0	1.63214	14.8864	2.89345	19.1477	0	36.2363	0	0	51.8523	27.6701	9.4874	4.53115	0.707406	2.4204	34.736	20.6787	0.649327	31.7126	0	6.45739	4.09301	28.7487	1.17149	1.00808	0.997232	0
MLTR18D_MM:ERVK:LTR	142.057	-2.19411	0.655007	-3.34974	0.000808866	0.0140074	MLTR18D_MM	ERVK	LTR	Down	NA	2cWT-2cKO	MLTR18D_MM:ERVK:LTR	18.6796	113.292	8.89166	53.9546	8.49518	19.3348	247.309	49.5079	80.7765	33.7382	150.157	125.542	135.992	35.3942	254.78	15.4537	67.0521	6.48417	201.529	268.348	42.6933	103.084	295.696	341.276	42.1266	640.244	146.099	85.3802	64.9516	364.381	145.009	103.765	42.1735	105.848	124.986	43.7428
RLTR13D5:ERVK:LTR	482.245	-2.04209	0.623325	-3.27612	0.00105243	0.016931	RLTR13D5	ERVK	LTR	Down	NA	2cWT-2cKO:8cWT-8cKO	RLTR13D5:ERVK:LTR	240.5	231.338	215.178	526.057	21.238	7.43647	67.6497	53.268	97.5229	428.475	4.89641	18.3599	47.7419	4.06163	1241.14	601.629	1276.74	1047.55	610.467	916.769	773.223	338.703	1034.94	922.575	1406.44	923.383	822.048	311.028	534.046	202.947	209.913	447.401	326.844	476.822	192.133	58.3238
MLTR25C:ERVK:LTR	55.7708	-4.17117	1.27456	-3.27264	0.00106548	0.0170893	MLTR25C	ERVK	LTR	Down	NA	2cWT-2cKO	MLTR25C:ERVK:LTR	0.778316	11.0915	0	4.49622	0	0	17.7442	3.13341	2.4627	74.2241	6.52855	6.94698	49.1887	12.7651	22.2427	83.1303	0	0	1.06912	6.26493	12.3336	1.13279	372.803	173.058	5.17344	77.1474	0	19.5155	4.81123	44.2793	16.0797	74.5668	0	10.0808	13.9612	91.1309
IAPLTR3-int:ERVK:LTR	305.194	-2.118	0.65214	-3.24777	0.00116312	0.0181883	IAPLTR3-int	ERVK	LTR	Down	NA	2cWT-2cKO:8cWT-8cKO	IAPLTR3-int:ERVK:LTR	98.0679	209.947	204.508	22.4811	4.24759	28.2586	12.1991	55.148	103.926	26.9906	11.425	22.8258	206.882	254.142	52.5736	184.379	98.9293	213.978	554.873	562.8	232.441	378.351	319.748	904.018	314.102	1788.71	237.654	329.933	70.5647	269.366	564.835	621.69	50.3739	618.961	709.032	204.133
MLTR11B:ERVK:LTR	237.858	-2.07501	0.641725	-3.23349	0.00122288	0.0187781	MLTR11B	ERVK	LTR	Down	NA	2cWT-2cKO	MLTR11B:ERVK:LTR	66.9352	103.389	16.8942	265.277	12.7428	40.1569	9.9811	371.622	168.941	334.008	29.3785	147.375	248.837	27.271	250.331	151.34	247.323	149.136	326.081	488.665	150.85	802.013	522.066	267.05	157.42	1422.06	96.1004	56.107	183.629	247.226	124.252	145.091	352.617	45.3636	137.95	29.1619
RLTR9A:ERVK:LTR	76.6903	-2.28901	0.710764	-3.22049	0.00127974	0.0192753	RLTR9A	ERVK	LTR	Down	8cWT-2cWT	2cWT-2cKO	RLTR9A:ERVK:LTR	0	23.3715	23.1183	8.99243	4.24759	31.2332	46.5785	90.2422	109.836	6.74764	13.0571	58.5531	88.2502	133.454	33.9706	52.7557	34.6253	94.3807	55.5942	50.6415	4.7437	173.316	34.6629	198.069	115.294	199.629	0	82.3309	16.0374	115.311	61.6875	103.316	35.1446	245.972	52.8533	160.39
RLTR13D4:ERVK:LTR	23.8673	-5.54694	1.72613	-3.21351	0.00131124	0.0194836	RLTR13D4	ERVK	LTR	Down	NA	2cWT-2cKO	RLTR13D4:ERVK:LTR	2.33495	0	0	0	0	0	0	70.1884	1.97016	0	0	1.48864	5.7869	8.12327	7.27942	90.5907	26.9308	0.720463	1.06912	128.431	0	0	0	14.9258	0	151.909	0	43.2999	0	114.388	16.372	19.7647	0	62.501	115.014	0
RLTR9B:ERVK:LTR	19.6901	-5.05162	1.58639	-3.18434	0.00145085	0.0205959	RLTR9B	ERVK	LTR	Down	8cWT-8cKO	2cWT-2cKO:8cKO-2cKO	RLTR9B:ERVK:LTR	0	0.396127	1.77833	8.99243	0	0	0	0.626682	0	0	0	0	49.1887	2.32093	87.7575	45.8282	59.3576	0	0	19.3169	0	109.88	1.41481	4.43739	127.119	14.316	5.84394	153.074	36.8861	0	0	0	0	0	0	0
RLTR13C3:ERVK:LTR	83.8168	-2.83719	0.918413	-3.08923	0.00200676	0.0258643	RLTR13C3	ERVK	LTR	Down	NA	2cWT-2cKO	RLTR13C3:ERVK:LTR	9.3398	5.9419	13.3375	4.49622	0	17.8475	1.10901	65.1749	0.985079	77.5979	9.79283	24.8106	59.3157	108.504	1.61765	23.447	2.19843	394.814	187.096	2.08831	21.821	48.7098	20.5148	5.24419	101.991	6.36267	79.2179	3.04929	48.9142	129.148	76.3053	41.3262	89.0329	158.269	142.937	1078.99
BGLII_A:ERVK:LTR	98.4222	-2.47569	0.806129	-3.07108	0.00213285	0.0267221	BGLII_A	ERVK	LTR	Down	NA	2cWT-2cKO	BGLII_A:ERVK:LTR	11.6747	3.56514	0	112.405	8.49518	20.8221	0	5.01346	40.3883	0	16.3214	65.0039	114.291	22.0489	37.6103	43.1638	122.562	24.4958	73.2346	182.727	156.542	118.943	2.82963	173.058	382.096	373.807	196.746	121.972	69.7628	139.295	67.5346	227.294	39.8305	331.658	124.322	204.133
RMER16-int:ERVK:LTR	406.713	-1.3836	0.460615	-3.00382	0.00266612	0.0311106	RMER16-int	ERVK	LTR	Down	NA	2cWT-2cKO	RMER16-int:ERVK:LTR	93.398	97.4472	89.8058	22.4811	679.615	59.4917	240.655	330.888	272.374	377.868	303.578	404.413	432.571	493.198	435.957	672.502	355.046	298.272	624.365	722.556	315.931	501.825	176.852	392.911	144.117	1321.05	133.112	384.211	222.92	618.987	699.027	614.053	226.097	485.895	859.281	164.036
RLTR27:ERVK:LTR	160.494	-1.38294	0.461537	-2.99639	0.00273201	0.0316179	RLTR27	ERVK	LTR	Down	NA	2cWT-2cKO:8cWT-8cKO	RLTR27:ERVK:LTR	72.3834	73.6796	163.607	94.4206	0	116.009	78.7398	23.1872	8.37318	50.6073	50.5963	74.4319	15.914	109.084	174.302	120.432	115.967	68.444	379.537	428.626	72.1043	302.454	108.941	362.656	264.585	221.898	209.733	451.295	147.544	125.458	146.471	164.856	146.436	193.551	168.532	346.298
RMER19B2:ERVK:LTR	298.829	-1.71391	0.573189	-2.99013	0.0027886	0.0320931	RMER19B2	ERVK	LTR	Down	NA	2cWT-2cKO	RMER19B2:ERVK:LTR	105.851	94.6743	328.102	215.818	21.238	66.9282	25.5073	100.896	147.762	26.9906	17.9535	143.405	428.231	204.822	439.596	545.675	168.729	538.186	623.831	483.966	257.109	369.289	294.988	448.177	186.983	1744.17	129.216	389.7	220.515	273.055	217.514	116.342	90.2043	463.717	248.643	25.5167
RLTR8:ERVK:LTR	43.6438	-3.4808	1.16499	-2.98783	0.00280963	0.0323127	RLTR8	ERVK	LTR	Down	8cWT-2cWT	2cWT-2cKO	RLTR8:ERVK:LTR	5.44822	0	8.00249	0	8.49518	2.97459	62.1046	18.8005	9.35825	438.597	0	2.97728	118.631	21.4686	2.83089	16.5195	81.8915	124.64	8.55295	70.4805	0	0	30.4185	37.9196	2.95625	202.81	2.59731	94.5281	16.0374	20.2947	15.7873	53.9037	121.834	0	13.9612	0
RMER19C:ERVK:LTR	305.923	-1.68869	0.572499	-2.94968	0.00318103	0.0352363	RMER19C	ERVK	LTR	Down	NA	2cWT-2cKO	RMER19C:ERVK:LTR	239.721	183.803	203.619	112.405	4.24759	17.8475	143.062	146.644	554.6	576.923	243.189	247.61	44.8485	145.639	533.824	418.849	206.103	417.869	239.483	245.899	204.928	261.674	722.262	223.483	518.083	1279.69	244.796	148.196	526.028	68.2639	301.713	327.016	439.307	591.743	481.995	21.8714
RLTR25B:ERVK:LTR	394.757	-1.34179	0.456531	-2.9391	0.00329163	0.0359821	RLTR25B	ERVK	LTR	Down	NA	2cWT-2cKO	RLTR25B:ERVK:LTR	147.88	340.273	220.513	121.398	114.685	26.7713	268.381	166.071	363.002	745.614	316.635	293.262	439.804	397.46	275	233.937	154.989	221.182	334.634	384.249	136.619	706.859	557.436	678.518	305.233	1628.05	120.125	289.073	174.006	803.484	413.101	318.481	302.243	438.515	572.079	1301.35
IAPLTR4_I:ERVK:LTR	85.9724	-2.71398	0.925378	-2.93284	0.00335878	0.0363845	IAPLTR4_I	ERVK	LTR	Down	NA	2cWT-2cKO	IAPLTR4_I:ERVK:LTR	2.33495	45.5546	3.55666	8.99243	0	8.92376	2.21802	48.8812	62.5525	10.1215	1.63214	55.0796	0	105.022	13.3456	4.79598	67.6017	1.44093	60.9398	30.8026	4.7437	87.2246	2.82963	221.063	143.378	503.446	7.79192	7.92816	29.6692	550.723	85.0761	78.6096	153.465	103.832	248.643	339.007
IAPLTR2b:ERVK:LTR	149.072	-1.97099	0.67597	-2.91579	0.0035479	0.0380267	IAPLTR2b	ERVK	LTR	Down	NA	2cWT-2cKO	IAPLTR2b:ERVK:LTR	24.1278	59.419	0.889166	8.99243	242.113	7.43647	57.6686	27.574	65.5078	84.3455	0	98.2501	140.332	24.95	40.8456	202.497	317.123	41.7869	226.653	103.893	30.3597	222.026	119.552	286.414	521.04	441.41	170.124	390.309	171.601	178.04	177.753	282.096	93.7188	315.529	159.225	14.5809
RMER16_Mm:ERVK:LTR	148.606	-2.29662	0.806319	-2.84828	0.00439566	0.0441381	RMER16_Mm	ERVK	LTR	Down	8cWT-2cWT	2cWT-2cKO	RMER16_Mm:ERVK:LTR	90.2847	44.7623	0	8.99243	8.49518	1.48729	39.9244	93.3756	185.687	64.1026	101.193	120.58	4.34018	614.467	100.294	31.4403	40.6709	146.254	140.055	158.19	68.3093	97.4197	14.1481	55.2657	25.1282	744.433	180.513	96.3576	44.1029	368.994	360.769	144.193	161.665	31.2505	190.471	3.64524
RLTR20A4:ERVK:LTR	360.419	-1.3312	0.469013	-2.8383	0.00453549	0.044915	RLTR20A4	ERVK	LTR	Down	8cWT-2cWT	2cWT-2cKO	RLTR20A4:ERVK:LTR	177.456	263.82	330.77	67.4433	110.437	78.8265	480.202	315.848	224.598	846.829	324.796	177.148	779.785	319.709	368.015	727.39	449.029	233.43	402.523	764.844	209.672	143.864	444.251	276.329	470.044	1364	329.858	184.787	156.365	885.585	225.7	293.775	149.95	139.115	289.197	306.2
ERVB5_1-I_MM-int:ERVK:LTR	55.7221	-2.3413	0.834413	-2.80592	0.00501732	0.0482421	ERVB5_1-I_MM-int	ERVK	LTR	Down	NA	2cWT-2cKO	ERVB5_1-I_MM-int:ERVK:LTR	21.7929	0.396127	13.3375	4.49622	0	50.568	95.375	37.6009	21.6717	10.1215	24.4821	11.9091	141.779	30.7524	48.5295	56.4859	84.6395	0.720463	58.267	13.0519	6.64118	250.346	89.8406	23.3972	26.6063	441.41	49.3488	27.4436	2.40561	43.3568	66.0728	102.417	2.34297	60.4848	8.97508	94.7762
RLTR45-int:ERVK:LTR	49741.7	1.60143	0.301268	5.31563	1.06288e-07	1.32164e-05	RLTR45-int	ERVK	LTR	Up	2cWT-2cKO:8cWT-2cWT:8cKO-2cKO	NA	RLTR45-int:ERVK:LTR	6716.87	6915.58	5883.61	4774.98	1720.27	4212.01	85087.8	61686.2	42154.5	108694	98628.5	111615	68538.6	87408.7	1139.63	962.393	1036.01	1357.35	1234.83	486.577	2646.99	1587.03	992.491	1349.37	2961.43	2677.09	1416.83	2901.71	2165.86	120108	211620	194428	98084.9	130370	159306	120996
ETnERV2-int:ERVK:LTR	829.765	1.42352	0.351518	4.04965	5.12952e-05	0.00185811	ETnERV2-int	ERVK	LTR	Up	2cWT-2cKO:8cKO-2cKO	8cWT-8cKO	ETnERV2-int:ERVK:LTR	578.289	728.477	539.724	1146.54	182.646	614.252	967.058	806.54	485.644	1163.97	305.21	699.164	1297.71	1026.43	182.39	84.7289	224.789	95.1012	314.321	322.122	227.698	356.828	38.9073	173.462	178.853	426.299	258.432	404.946	242.967	2328.35	2722.73	2974.59	1487.79	2240.96	1996.13	1377.9
RLTR13B1:ERVK:LTR	2397.46	1.56168	0.441071	3.54066	0.00039913	0.00838731	RLTR13B1	ERVK	LTR	Up	2cWT-2cKO:8cWT-2cWT:8cKO-2cKO	NA	RLTR13B1:ERVK:LTR	780.651	291.945	433.024	827.304	42.4759	184.424	5097.02	2961.07	1902.68	3842.78	3166.35	5096.6	4487.74	3962.41	93.0148	156.136	35.7245	149.856	178.543	142.005	91.0791	139.333	88.4258	94.7989	204.721	611.612	29.2197	84.7703	69.7628	5318.12	9396.96	10610.5	4364.95	5811.58	7866.16	4972.1
MT2_Mm:ERVL:LTR	42795.3	-1.85946	0.281445	-6.60683	3.92639e-11	1.41162e-08	MT2_Mm	ERVL	LTR	Down	NA	2cWT-2cKO:8cWT-8cKO:8cWT-2cWT:8cKO-2cKO	MT2_Mm:ERVL:LTR	12371.3	14598.5	25584.9	26635.6	42841.2	22452.2	2291.22	1081.03	1961.79	3036.44	1723.54	2221.54	2945.53	2392.88	58038.4	81186.3	103028	77745.9	109641	132967	74224.7	61736.9	118769	110321	97151.4	108694	36100	80738.5	60205.3	6228.62	6196.81	8165.52	15325.4	22271.5	12857.3	17387.8
MT2B2:ERVL:LTR	2326.8	-1.23885	0.219625	-5.64074	1.69323e-08	2.70518e-06	MT2B2	ERVL	LTR	Down	NA	2cWT-2cKO:8cWT-8cKO:8cWT-2cWT:8cKO-2cKO	MT2B2:ERVL:LTR	978.344	1262.85	2420.31	1731.04	1287.02	1180.91	802.924	778.966	870.81	435.223	1481.98	917.001	933.138	838.437	4077.29	3199.98	3168.49	2521.62	5180.95	5804.46	3468.59	2145.5	2304.73	4769.39	2774.44	3886	3053.78	2505.3	3403.14	2126.33	1721.69	2212.75	1575.65	2864.96	1928.98	2974.51
MERVL-int:ERVL:LTR	403401	-1.77564	0.318033	-5.5832	2.36133e-08	3.61589e-06	MERVL-int	ERVL	LTR	Down	NA	2cWT-2cKO:8cWT-8cKO:8cWT-2cWT:8cKO-2cKO	MERVL-int:ERVL:LTR	104936	156055	256226	273015	400552	222883	29474.2	12360.7	10580.7	19480.4	16953	14995.5	31761.4	14662.5	503832	828850	932639	628298	1.05704e+06	1.22335e+06	702380	606772	1.2245e+06	895008	999523	778913	334840	805605	578983	61990.1	59870.7	83712.1	183280	220971	104990	189709
ERVL-B4-int:ERVL:LTR	702.186	-2.76555	0.510182	-5.42072	5.93609e-08	7.85369e-06	ERVL-B4-int	ERVL	LTR	Down	NA	2cWT-2cKO:8cKO-2cKO	ERVL-B4-int:ERVL:LTR	74.7184	188.16	270.306	58.4508	310.074	269.2	263.945	364.102	82.7467	148.448	16.3214	184.591	157.693	128.232	814.486	1032.73	2253.94	1600.15	1877.37	2231.36	969.613	266.205	1548.51	2050.48	1130.77	1167.55	516.215	886.734	1565.25	125.458	38.0065	184.62	379.561	191.535	302.826	575.947
MERVL_2A-int:ERVL:LTR	18298.5	-1.63287	0.303733	-5.37601	7.61549e-08	9.83945e-06	MERVL_2A-int	ERVL	LTR	Down	NA	2cWT-2cKO:8cWT-8cKO:8cWT-2cWT:8cKO-2cKO	MERVL_2A-int:ERVL:LTR	4588.95	7369.54	12782.6	13335.8	20940.6	9597.5	2279.02	1071.63	1357.93	1450.74	2534.71	1595.82	1821.43	1503.97	21239.7	36486.7	39574.5	29100.2	44899.8	55770.4	29245.9	27577.7	54043	40338.3	42342.4	36468.5	15285.8	31463.8	28006.2	3812.63	3134.66	4000.56	9089.55	11196.7	5096.85	9484.91
MLT2F:ERVL:LTR	35.6361	-4.43596	1.0694	-4.14807	3.35287e-05	0.00134878	MLT2F	ERVL	LTR	Down	NA	2cWT-2cKO:8cKO-2cKO	MLT2F:ERVL:LTR	1.55663	0	2.6675	17.9849	0	1.48729	0	23.8139	22.1643	67.4764	0	8.93183	0	4.06163	85.331	31.9732	37.3733	62.6803	51.8523	35.5013	22.7698	5.66394	41.0296	135.139	0	334.04	9.7399	60.9858	156.365	68.2639	2.33886	9.43316	1.17149	12.097	0.997232	3.64524
MT2B1:ERVL:LTR	2095.37	-1.11766	0.274698	-4.06868	4.72802e-05	0.00176203	MT2B1	ERVL	LTR	Down	NA	2cWT-2cKO:8cKO-2cKO	MT2B1:ERVL:LTR	2043.08	1373.37	605.522	1704.07	1478.16	1041.11	1163.35	1347.37	1767.73	1518.22	448.838	1297.6	843.441	1453.48	3941	2808.31	4123.7	2187.33	3587.43	5421.78	1924.99	1747.89	2282.09	3102.55	2456.65	4303.55	2246.02	2445.53	2115.34	1770.25	1594.52	1919.42	577.542	2465.76	2351.14	1749.71
MT2B:ERVL:LTR	2177.06	-0.708364	0.17869	-3.96421	7.36408e-05	0.00242122	MT2B	ERVL	LTR	Down	NA	2cWT-2cKO:8cKO-2cKO	MT2B:ERVL:LTR	1488.92	1578.57	1500.91	1677.09	2191.76	1386.16	1502.71	1787.3	1788.41	1754.39	2069.55	1357.64	2401.56	1680.94	2443.86	2201.89	2624.92	2324.22	2759.4	2892.83	2054.97	2513.65	3335.42	2694.71	2522.42	5874.34	1878.5	1713.7	2222.79	2170.61	2058.78	2109.43	1624.85	1902.25	1652.75	2376.69
RMER15-int:ERVL:LTR	365.693	-1.60261	0.420822	-3.80828	0.000139939	0.00401789	RMER15-int	ERVL	LTR	Down	NA	2cWT-2cKO	RMER15-int:ERVL:LTR	107.408	162.412	277.42	175.352	42.4759	169.551	387.045	227.486	294.046	118.084	119.146	467.929	344.321	241.377	501.067	179.05	247.873	320.606	415.353	539.306	197.338	424.795	143.603	1263.04	342.925	1467.39	279.211	446.416	365.653	237.079	468.065	305.455	268.27	335.691	909.475	156.745
LTR16E1:ERVL:LTR	40.3311	-4.18217	1.1312	-3.6971	0.000218076	0.00553293	LTR16E1	ERVL	LTR	Down	NA	2cWT-2cKO	LTR16E1:ERVL:LTR	0	7.92254	0	8.99243	4.24759	0	70.9767	1.25336	10.3433	0	1.63214	54.5834	7.23363	52.8012	76.4339	67.1437	180.821	10.807	70.5618	99.1948	13.2824	49.8426	9.90369	114.162	14.7813	135.207	0.649327	45.7394	0.801872	11.0698	0.877073	76.8128	0	1.00808	229.363	0
MER74B:ERVL:LTR	18.8936	-6.38945	1.79996	-3.54977	0.000385569	0.00820471	MER74B	ERVL	LTR	Down	8cWT-2cWT	2cWT-2cKO:8cKO-2cKO	MER74B:ERVL:LTR	0.778316	0	0	0	0	0	6.65407	1.25336	0	0	0	0.496213	183.734	0	46.5074	0	44.5182	0	18.7096	0	74.9505	94.0213	3.53703	27.8346	0	159.862	0	0.609858	25.6599	0	0.877073	4.04278	4.68594	0	0.332411	0
LTR33A_:ERVL:LTR	11.5389	-4.65078	1.35651	-3.4285	0.000606927	0.0114201	LTR33A_	ERVL	LTR	Down	NA	2cWT-2cKO:8cKO-2cKO	LTR33A_:ERVL:LTR	1.55663	0.792254	0	0	0	1.48729	0	6.8935	43.3435	0	0	2.48106	10.1271	0.580233	8.49266	0	48.3654	1.44093	20.3133	38.6338	8.53866	65.7017	0	0.806799	1.47813	140.774	2.59731	1.21972	0.801872	0	1.46179	0.449198	3.51446	12.097	2.99169	0
MER54A:ERVL:LTR	16.6777	-6.82662	2.06088	-3.31247	0.000924744	0.0153862	MER54A	ERVL	LTR	Down	NA	2cWT-2cKO	MER54A:ERVL:LTR	0	0	0	0	0	0	0	11.907	0	0	11.425	0	8.68035	0	0	0	241.827	0	16.0368	59.5169	0.94874	1.13279	0.707406	1.6136	0	71.5801	0	1.21972	64.9516	0	0.292358	4.94118	0	0	0.664821	0
MER68-int:ERVL:LTR	15.5378	-6.09735	1.85004	-3.2958	0.000981424	0.0160542	MER68-int	ERVL	LTR	Down	NA	2cWT-2cKO	MER68-int:ERVL:LTR	0	0	0.889166	0	0	0	0	1.88005	37.9256	0	1.63214	4.96213	7.23363	0	0	0	10.4425	0.720463	0	0	1.89748	99.6853	0.707406	64.9473	0	228.261	0.649327	0.609858	0	0	36.5447	17.5187	18.7438	39.3151	0.332411	0
MLT2B2:ERVL:LTR	30.3545	-3.46528	1.07797	-3.21462	0.00130616	0.0194256	MLT2B2	ERVL	LTR	Down	NA	2cWT-2cKO	MLT2B2:ERVL:LTR	10.8964	1.58451	0.889166	0	0	1.48729	1.10901	19.4271	0.49254	26.9906	13.0571	4.46591	60.7625	1.16047	115.662	4.79598	28.5796	20.8934	83.3913	56.3844	20.8723	2.26557	0	49.6181	1.47813	31.018	0.649327	7.3183	45.7067	48.8917	8.77073	1.79679	3.51446	3.02424	139.28	298.909
ERV3-16A3_I-int:ERVL:LTR	60.6853	-2.64247	0.841006	-3.14203	0.0016778	0.0228751	ERV3-16A3_I-int	ERVL	LTR	Down	NA	2cWT-2cKO	ERV3-16A3_I-int:ERVL:LTR	27.2411	26.5405	2.6675	0	4.24759	14.8729	17.7442	167.324	60.0898	23.6167	52.2284	28.7803	18.8074	11.0244	61.8751	63.9463	108.273	5.76371	5.34559	214.574	5.69244	31.718	99.7443	62.9303	14.7813	544.009	16.8825	2.43943	2.40561	133.76	148.81	120.385	49.2024	57.4606	17.6178	14.5809
MLT2E:ERVL:LTR	8.51643	-6.18623	2.01718	-3.06678	0.0021638	0.0269668	MLT2E	ERVL	LTR	Down	NA	2cWT-2cKO	MLT2E:ERVL:LTR	0	0	0	0	0	0	0	0	0	0	0	0	0	0	0	27.7101	6.59529	68.444	0.534559	67.8701	0	3.39836	0	0.4034	0	48.5154	57.7901	0.609858	12.8299	7.37988	0	13.0267	0	0	0	0
RMER15:ERVL:LTR	1630.93	-1.09829	0.358336	-3.06496	0.00217697	0.0271005	RMER15	ERVL	LTR	Down	NA	2cWT-2cKO	RMER15:ERVL:LTR	593.077	816.417	1205.71	1955.85	212.38	670.769	728.62	1183.8	1626.37	1184.21	2126.68	1574.48	1351.24	1584.04	1616.44	1504.34	2026.4	1654.9	1379.7	1575.11	1324.44	1423.91	1681.5	2026.68	1420.48	7819.72	1079.18	1281.92	1349.55	1472.29	1772.86	1299.98	978.19	1376.03	1600.89	3178.65
MT2A:ERVL:LTR	812.163	-1.23401	0.404422	-3.0513	0.00227851	0.0279915	MT2A	ERVL	LTR	Down	NA	2cWT-2cKO	MT2A:ERVL:LTR	483.335	398.107	406.349	508.072	301.579	697.541	395.917	337.155	617.152	715.25	349.278	402.429	1749.09	410.805	760.7	393.27	591.377	1064.12	1403.75	1029.54	407.958	1495.28	1286.06	1484.11	560.21	3790.56	744.778	787.327	646.308	241.691	487.068	629.775	673.604	1036.31	807.093	306.2
MER21C:ERVL:LTR	257.774	-1.50402	0.498134	-3.01931	0.00253351	0.0300461	MER21C	ERVL	LTR	Down	8cWT-2cWT	2cWT-2cKO	MER21C:ERVL:LTR	26.4628	150.132	77.3574	364.194	16.9904	7.43647	154.153	132.857	200.956	212.551	633.27	411.36	315.386	405.583	256.802	304.811	402.862	87.1761	391.298	390.514	256.16	295.657	99.0369	305.777	80.5579	914.634	172.072	323.225	206.081	273.978	330.364	328.813	145.264	251.012	296.178	236.94
RLTR28B:ERVL:LTR	37.4967	-3.23617	1.07459	-3.01153	0.00259931	0.0305091	RLTR28B	ERVL	LTR	Down	NA	2cWT-2cKO	RLTR28B:ERVL:LTR	0.778316	23.7676	0	4.49622	0	0	42.1424	13.1603	2.95524	16.8691	1.63214	1.48864	10.1271	163.626	12.9412	44.2296	51.1135	32.4209	0.534559	1.56623	0	152.926	50.9333	48.4079	6.65157	70.7847	70.7766	190.276	5.6131	74.7213	23.0963	64.6845	2.34297	174.398	11.9668	0
MER54B:ERVL:LTR	9.61973	-6.30617	2.11496	-2.98169	0.0028666	0.0327628	MER54B	ERVL	LTR	Down	NA	2cWT-2cKO	MER54B:ERVL:LTR	0	0	0	0	0	0	0	0	0	0	0	0	0	0.580233	4.85295	8.52618	34.0756	152.738	0	4.6987	0	4.53115	97.6221	0	0	0.795334	0	0	12.8299	8.30236	0	0.449198	0	0	25.928	0
MER68:ERVL:LTR	65.5574	-3.74385	1.2746	-2.93728	0.00331105	0.0361202	MER68	ERVL	LTR	Down	NA	2cWT-2cKO	MER68:ERVL:LTR	0	2.37676	0.889166	0	0	47.5934	0	45.7478	1.97016	30.3644	3.26428	45.1554	39.0616	2.90117	129.412	0.532886	3.29764	117.436	0	119.034	244.775	2.26557	1.41481	252.528	0.739063	683.987	79.8672	90.8689	8.82059	249.071	139.455	0	31.6301	0	35.9003	7.29047
MLT2D:ERVL:LTR	76.07	-2.63906	0.917793	-2.87544	0.00403467	0.0415476	MLT2D	ERVL	LTR	Down	8cWT-2cWT	2cWT-2cKO	MLT2D:ERVL:LTR	3.11327	0	52.4608	4.49622	8.49518	2.97459	96.484	79.5886	59.5973	280.027	210.546	146.879	245.943	164.206	141.14	9.59195	23.6331	67.0031	22.9861	23.4935	1.89748	2.26557	19.1	40.7434	48.0391	641.835	2.59731	92.0886	2.40561	2.76745	45.0231	81.3048	31.6301	95.7676	57.1746	7.29047
MTA_Mm:ERVL-MaLR:LTR	168459	-1.87322	0.319927	-5.85513	4.76628e-09	9.07096e-07	MTA_Mm	ERVL-MaLR	LTR	Down	NA	2cWT-2cKO:8cWT-8cKO:8cWT-2cWT:8cKO-2cKO	MTA_Mm:ERVL-MaLR:LTR	65748.3	61861.5	57435.7	186449	102439	105763	7582.31	7998.34	7274.81	10118.1	6301.69	3593.08	8746.9	5929.99	334746	334308	500483	398411	353454	508676	237632	402052	279745	348279	295186	624711	222398	249880	219155	22629.5	11501.6	26419.6	34781.4	26675.8	13502.5	54015.1
MTA_Mm-int:ERVL-MaLR:LTR	999114	-1.94865	0.351049	-5.55093	2.84153e-08	4.16263e-06	MTA_Mm-int	ERVL-MaLR	LTR	Down	NA	2cWT-2cKO:8cWT-8cKO:8cWT-2cWT:8cKO-2cKO	MTA_Mm-int:ERVL-MaLR:LTR	366227	332357	307201	1.08899e+06	593499	575733	38381.8	32595.6	33883.8	40475.7	23638.3	14761.3	33051.9	23492.5	2.03485e+06	2.07557e+06	2.95762e+06	1.51521e+06	2.0566e+06	3.23781e+06	1.6179e+06	2.29061e+06	1.75567e+06	1.94608e+06	1.90203e+06	3.82987e+06	1.32931e+06	1.58978e+06	1.3596e+06	157423	58623.8	149121	215005	183965	69774.6	429088
MTB-int:ERVL-MaLR:LTR	4016.67	-1.82574	0.350133	-5.21443	1.84386e-07	2.07354e-05	MTB-int	ERVL-MaLR	LTR	Down	NA	2cWT-2cKO:8cWT-8cKO:8cWT-2cWT:8cKO-2cKO	MTB-int:ERVL-MaLR:LTR	1654.7	1639.96	1484.02	5094.21	1979.38	1930.51	268.381	378.516	561.988	728.745	582.673	159.284	114.291	327.252	7152.03	7452.41	14492	5338.63	7367.83	11468.5	7046.29	8601.25	8107.58	6728.3	7870.29	13528.6	4617.36	7070.7	5164.05	827.469	548.755	623.936	1068.39	1281.27	517.231	1921.04
MTB:ERVL-MaLR:LTR	2225.24	-1.48929	0.294746	-5.0528	4.35373e-07	4.21064e-05	MTB	ERVL-MaLR	LTR	Down	NA	2cWT-2cKO:8cWT-2cWT:8cKO-2cKO	MTB:ERVL-MaLR:LTR	1183.82	964.965	818.033	2607.81	1333.74	1430.78	303.869	513.253	1222.48	725.372	739.359	848.028	568.563	734.576	3061.81	3002.81	5078.92	4010.1	4012.4	5567.44	3125.15	4305.72	2873.48	3995.27	3389.34	8592.79	2333.03	2309.53	2748.01	866.213	922.973	1250.57	654.86	1057.48	817.065	1381.54
MTB_Mm:ERVL-MaLR:LTR	577.246	-1.72854	0.35115	-4.92253	8.54337e-07	7.283e-05	MTB_Mm	ERVL-MaLR	LTR	Down	NA	2cWT-2cKO:8cKO-2cKO	MTB_Mm:ERVL-MaLR:LTR	244.391	185.783	379.674	328.224	101.942	417.929	531.216	323.995	646.212	475.709	283.992	259.519	542.522	132.873	909.119	765.225	1165.72	797.553	850.484	791.47	570.193	942.479	495.184	1215.85	802.623	2661.98	647.379	792.816	357.635	121.768	365.155	455.037	406.505	130.042	382.272	590.528
ORR1A2-int:ERVL-MaLR:LTR	12274.7	-0.948696	0.212389	-4.46678	7.9404e-06	0.000464023	ORR1A2-int	ERVL-MaLR	LTR	Down	NA	2cWT-2cKO:8cWT-8cKO:8cWT-2cWT:8cKO-2cKO	ORR1A2-int:ERVL-MaLR:LTR	7155.06	6565.4	13720.7	10143.5	9365.94	9936.61	4867.45	1972.17	3962.97	3616.74	3576.01	2726.19	4121.72	2817.61	18343.7	25396.8	19821	16531	16038.4	20923.8	18413.2	18201.6	21118.2	14841.9	26880.5	16189.8	12608.6	14681.7	14486.6	8600.33	6762.52	11775.3	11126.8	9136.23	11697.2	10607.6
MT-int:ERVL-MaLR:LTR	37586.6	-1.5668	0.351474	-4.45779	8.28078e-06	0.000478838	MT-int	ERVL-MaLR	LTR	Down	NA	2cWT-2cKO:8cWT-8cKO:8cWT-2cWT:8cKO-2cKO	MT-int:ERVL-MaLR:LTR	16382.8	15754.4	16474.5	46846.1	32358.1	26351.9	1950.75	1497.14	1460.87	1761.13	1150.66	659.963	2008.05	1683.26	78125.6	74433	96722.6	58419.5	72916.6	120193	70280.8	74087.7	72295.5	63004.6	69376.6	136502	43819.2	60852.3	50643.8	6067.18	2628.88	5485.6	9394.14	7283.38	2918.9	18831.3
ORR1B1-int:ERVL-MaLR:LTR	1341.19	-0.884183	0.218376	-4.0489	5.1458e-05	0.00185811	ORR1B1-int	ERVL-MaLR	LTR	Down	NA	2cWT-2cKO:8cKO-2cKO	ORR1B1-int:ERVL-MaLR:LTR	1078.75	570.423	810.03	1124.05	853.766	944.431	1441.71	988.278	950.109	1541.84	1503.2	994.41	1536.42	1107.09	1669.82	1815.01	1671.9	1019.46	1215.05	1403.35	1474.34	2063.94	2010.45	1350.18	1666.59	3777.84	925.291	1651.5	1076.11	1154.95	1144.29	1071.34	975.847	1831.68	861.608	1017.02
MLT1K:ERVL-MaLR:LTR	195.227	-2.67261	0.72171	-3.70316	0.000212927	0.00542588	MLT1K	ERVL-MaLR	LTR	Down	NA	2cWT-2cKO	MLT1K:ERVL-MaLR:LTR	130.757	63.7764	8.89166	13.4887	0	62.4663	2.21802	43.2411	281.24	47.2335	17.9535	144.398	88.2502	190.897	229.706	276.568	213.797	122.479	256.589	427.06	82.5404	397.608	372.096	194.035	541.733	950.424	429.854	11.5873	33.6786	11.0698	160.212	165.305	180.409	237.907	257.286	568.657
ORR1C1-int:ERVL-MaLR:LTR	269.97	-1.53437	0.447365	-3.4298	0.000604022	0.0114164	ORR1C1-int	ERVL-MaLR	LTR	Down	8cKO-2cKO	2cWT-2cKO:8cWT-8cKO	ORR1C1-int:ERVL-MaLR:LTR	33.4676	90.713	198.284	44.9622	67.9615	101.136	31.0523	65.1749	93.5825	13.4953	79.9748	37.216	361.681	162.465	195.736	184.912	231.934	100.144	196.183	322.644	76.848	252.612	372.096	309.407	329.622	654.56	201.291	300.66	197.26	474.157	364.278	554.759	678.29	339.723	348.699	765.5
ORR1A3-int:ERVL-MaLR:LTR	2370.95	-0.984307	0.288423	-3.41272	0.000643187	0.0118585	ORR1A3-int	ERVL-MaLR	LTR	Down	NA	2cWT-2cKO:8cWT-8cKO:8cWT-2cWT:8cKO-2cKO	ORR1A3-int:ERVL-MaLR:LTR	1302.9	1093.31	3021.39	2216.63	1503.65	1915.63	833.976	467.505	845.198	408.232	287.256	378.114	776.891	635.936	3100.63	4573.23	3628.51	2924.36	3079.6	3877.99	3072.02	3664.57	4261.42	3233.25	5006.42	6023.86	2128.49	3092.59	2992.58	952.004	1213.28	1577.13	1220.69	2282.29	1741.83	2697.48
MLT1C:ERVL-MaLR:LTR	540.335	-1.4582	0.44909	-3.24702	0.00116621	0.0182123	MLT1C	ERVL-MaLR	LTR	Down	NA	2cWT-2cKO	MLT1C:ERVL-MaLR:LTR	219.485	262.632	577.069	319.231	76.4566	150.217	367.083	449.331	338.375	698.381	252.981	111.152	684.301	504.803	411.287	488.124	411.106	367.436	608.863	485.532	954.433	650.22	789.465	779.771	683.634	3505.83	440.244	317.736	165.186	833.004	259.906	853.027	210.867	453.636	328.422	400.976
ORR1D1-int:ERVL-MaLR:LTR	298.955	-1.75453	0.543295	-3.22943	0.00124039	0.0189467	ORR1D1-int	ERVL-MaLR	LTR	Down	NA	2cWT-2cKO:8cKO-2cKO	ORR1D1-int:ERVL-MaLR:LTR	56.8171	108.143	93.3624	40.466	552.187	5.94917	35.4884	334.648	167.956	50.6073	261.142	197.493	247.39	239.636	279.449	754.567	441.884	54.7552	396.643	625.449	461.088	217.495	607.662	410.661	339.969	1436.37	568.161	345.18	197.26	175.272	225.7	82.2032	108.948	465.733	275.568	120.293
ORR1B1:ERVL-MaLR:LTR	1590.2	-0.974528	0.302007	-3.22683	0.00125168	0.0190085	ORR1B1	ERVL-MaLR	LTR	Down	NA	2cWT-2cKO	ORR1B1:ERVL-MaLR:LTR	674.022	962.588	789.579	1627.63	819.785	1182.4	1185.53	1421.94	1329.36	698.381	755.68	1244.5	1710.03	1589.84	1664.97	1752.66	1665.86	2057.64	1777.41	2298.19	1369.03	1368.41	2163.96	2592.25	1229.8	6680.01	1123.98	992.85	967.859	1974.12	1605.34	1909.99	809.496	1759.1	1701.61	1228.44
ORR1D2:ERVL-MaLR:LTR	844.366	-1.20911	0.375934	-3.2163	0.00129856	0.0193845	ORR1D2	ERVL-MaLR	LTR	Down	NA	2cWT-2cKO	ORR1D2:ERVL-MaLR:LTR	489.561	862.764	580.625	350.705	365.293	304.895	503.491	585.948	910.706	482.456	339.485	645.077	1637.69	733.415	1022.35	816.915	944.225	1305.48	964.88	1412.22	684.99	1189.43	946.51	1421.18	591.251	3798.52	862.306	586.684	575.744	524.894	648.742	617.647	306.929	243.955	1083.33	306.2
ORR1A4-int:ERVL-MaLR:LTR	2032.66	-0.806497	0.252222	-3.19757	0.0013859	0.0200692	ORR1A4-int	ERVL-MaLR	LTR	Down	NA	2cWT-2cKO:8cWT-8cKO:8cWT-2cWT	ORR1A4-int:ERVL-MaLR:LTR	1205.61	1228.39	1519.58	3025.95	1333.74	1006.9	991.456	1080.4	641.287	576.923	985.812	1008.3	1359.92	811.747	2815.52	2835.49	2388.04	1750.73	2377.72	2147.83	2400.31	2468.34	2122.22	2728.59	3857.17	5965.8	1853.83	2268.67	2677.45	1502.73	1314.15	2032.17	2670.99	2476.85	1267.81	3966.02
ORR1C2:ERVL-MaLR:LTR	872.466	-1.09398	0.342544	-3.1937	0.00140463	0.020235	ORR1C2	ERVL-MaLR	LTR	Down	NA	2cWT-2cKO	ORR1C2:ERVL-MaLR:LTR	321.445	689.657	656.204	418.148	492.721	600.867	900.517	567.774	865.885	671.39	647.959	769.626	1048.88	655.084	1015.07	499.314	883.768	605.91	1021.01	920.945	677.401	1051.23	954.999	1291.69	580.904	5284.99	414.271	809.282	978.283	802.562	642.31	902.439	537.712	638.115	826.705	750.919
MLT1H1:ERVL-MaLR:LTR	42.8506	-3.92066	1.26022	-3.11108	0.00186402	0.0246675	MLT1H1	ERVL-MaLR	LTR	Down	NA	2cWT-2cKO	MLT1H1:ERVL-MaLR:LTR	11.6747	7.92254	0	0	8.49518	0	0	0	27.5822	0	233.396	8.93183	18.8074	64.4059	8.08825	6.39463	0	30.2595	113.861	4.6987	0.94874	57.7721	31.1259	38.323	39.9094	672.057	54.5435	0	28.0655	0	15.495	6.73797	11.7149	2.01616	12.2992	61.969
MLT1F:ERVL-MaLR:LTR	106.842	-2.57611	0.837849	-3.07467	0.00210732	0.0264623	MLT1F	ERVL-MaLR	LTR	Down	NA	2cWT-2cKO	MLT1F:ERVL-MaLR:LTR	56.8171	17.8257	23.1183	58.4508	16.9904	4.46188	105.356	129.097	133.971	13.4953	6.52855	7.44319	8.68035	66.7269	249.522	31.4403	106.624	2.16139	46.5067	21.4052	125.234	150.661	498.014	126.667	1.47813	993.372	64.9327	157.953	56.9329	5.53491	40.6377	17.5187	3.51446	35.2828	98.7259	174.971
ORR1A4:ERVL-MaLR:LTR	908.187	-0.96743	0.31566	-3.06479	0.00217822	0.0271005	ORR1A4	ERVL-MaLR	LTR	Down	NA	2cWT-2cKO	ORR1A4:ERVL-MaLR:LTR	340.903	410.387	661.539	696.914	649.881	510.142	957.077	797.766	1025.96	489.204	894.412	762.679	1578.38	427.052	780.516	883.525	966.759	1364.56	1366.33	999.779	755.197	1042.16	977.636	985.505	611.205	3271.21	996.717	536.066	405.747	927.097	880.874	1203.4	547.084	1361.92	1414.07	692.595
ORR1A1:ERVL-MaLR:LTR	3839.55	-0.706244	0.239276	-2.95158	0.00316152	0.035072	ORR1A1	ERVL-MaLR	LTR	Down	NA	2cWT-2cKO:8cWT-8cKO:8cWT-2cWT	ORR1A1:ERVL-MaLR:LTR	1769.89	1588.07	3693.59	4941.34	3550.99	3234.86	1875.34	962.584	1440.68	867.072	569.616	986.471	873.822	912.127	4911.18	7634.66	3361.95	6861.69	3137.33	5152.91	4739.91	6060.41	7490.02	4841.6	5490.5	3656.95	5312.14	3727.45	4120.02	2990.7	3429.06	4368	4859.32	4671.44	6067.49	4447.19
MLT1D-int:ERVL-MaLR:LTR	55.4293	-4.87855	1.66246	-2.93454	0.00334041	0.0362576	MLT1D-int	ERVL-MaLR	LTR	Down	NA	2cWT-2cKO	MLT1D-int:ERVL-MaLR:LTR	0	0	10.67	0	0	1.48729	8.87209	8.14687	48.2689	0	0	0	53.5288	0.580233	22.6471	0.532886	0	1.44093	200.46	6.26493	57.8732	84.959	15.5629	6.45439	0	567.073	0	0	0	41.5118	0.292358	39.0802	29.2871	0	0.332411	295.264
MLT1C-int:ERVL-MaLR:LTR	6.34295	-5.72219	1.98195	-2.88715	0.00388753	0.0404757	MLT1C-int	ERVL-MaLR	LTR	Down	NA	2cWT-2cKO	MLT1C-int:ERVL-MaLR:LTR	0	0	0	0	0	0	0	0	2.95524	0	6.52855	0	1.44673	0	2.83089	15.4537	0	0	2.13824	4.6987	0	32.8508	69.3258	24.204	0	38.9714	0	0	23.2543	1.84497	8.18601	0	0	0	0	0
RMER1B:RMER1B:Other	1491.5	-1.58614	0.330764	-4.79539	1.6236e-06	0.000120409	RMER1B	RMER1B	Other	Down	NA	2cWT-2cKO:8cKO-2cKO	RMER1B:RMER1B:Other	544.822	1003.39	858.934	1088.08	658.377	327.205	799.597	986.398	1077.68	2159.25	745.887	649.046	1495.91	888.337	1551.33	1413.21	2270.43	1647.7	2078.37	2519.55	2089.13	1733.16	1788.32	2577.72	2051.64	7037.91	1132.43	2121.7	1596.53	1415.09	1094	1487.74	593.943	1351.84	1431.69	656.143
RMER1C:RMER1C:Other	448.427	-0.980778	0.334227	-2.93447	0.00334119	0.0362576	RMER1C	RMER1C	Other	Down	NA	2cWT-2cKO	RMER1C:RMER1C:Other	156.442	141.021	184.946	247.292	496.968	493.781	379.282	350.942	355.121	711.876	439.045	208.409	326.96	381.213	479.229	483.861	427.594	636.169	401.454	412.964	408.907	866.582	476.084	560.322	566.123	1736.21	261.679	271.997	444.237	522.126	326.563	394.396	277.642	528.234	535.513	565.012
IMPB_01:Satellite:Satellite	1867.78	-1.6928	0.348517	-4.85715	1.1909e-06	9.58106e-05	IMPB_01	Satellite	Satellite	Down	8cWT-2cWT	2cWT-2cKO:8cKO-2cKO	IMPB_01:Satellite:Satellite	675.579	794.234	790.468	1236.46	310.074	1008.38	1858.7	1332.33	1189.48	2918.36	2404.14	1368.06	2647.51	1033.4	2892.76	1614.65	1131.64	2233.44	1179.77	2797.81	1723.86	2963.37	1984.27	3328.45	2152.89	9897.93	1468.13	2296.12	1250.92	1805.3	1500.67	1381.73	659.546	1840.75	1144.82	944.116
(CATTC)n:Satellite:Satellite	44.7991	-6.84259	2.01325	-3.39878	0.000676864	0.0122876	(CATTC)n	Satellite	Satellite	Down	8cWT-2cWT	2cWT-2cKO	(CATTC)n:Satellite:Satellite	2.33495	0	0.889166	0	0	0	96.484	19.4271	275.822	10.1215	0	70.9584	0	0	0.404412	0	78.5938	95.1012	0	0	0.94874	259.408	13.4407	622.849	0	0	3.24663	1.21972	0	0	0.877073	102.417	0	3.02424	0	0
[truncated: 1 more columns]

## Sheet: FOURWAY_8cWT_vs_8cKO_DE_TEmulti
Figure 1–figure supplement 5–Source Data 1. Differential TE Expression (DTE) – Multimapping Reads. TE expression analysis by DESeq2 (v146.0) using multimapped reads across four comparisons.
tetranscripts_id	baseMean	log2FoldChange	lfcSE	stat	pvalue	padj	gene_id	family_id	class_id	Direction	FOUR_WAY_UP_COMP	FOUR_WAY_DOWN_COMP	tetranscripts_id	TZSC118	TZSC119	TZSC120	TZSC121	TZSC122	TZSC123	TZSC125	TZSC126	TZSC127	TZSC128	TZSC129	TZSC130	TZSC131	TZSC132	TZSC94	TZSC95	TZSC96	TZSC97	TZSC98	TZSC99	TZSC100	TZSC101	TZSC102	TZSC103	TZSC104	TZSC105	TZSC106	TZSC107	TZSC108	TZSC109	TZSC110	TZSC111	TZSC112	TZSC113	TZSC114	TZSC115
														2c WT	2c WT	2c WT	2c WT	2c WT	2c WT	8c WT	8c WT	8c WT	8c WT	8c WT	8c WT	8c WT	8c WT	2c KO	2c KO	2c KO	2c KO	2c KO	2c KO	2c KO	2c KO	2c KO	2c KO	2c KO	2c KO	2c KO	2c KO	2c KO	8c KO	8c KO	8c KO	8c KO	8c KO	8c KO	8c KO
ORSL:hAT-Tip100:DNA	13.6467	4.9484	1.74063	2.84288	0.00447079	0.048998	ORSL	hAT-Tip100	DNA	Up	8cWT-8cKO	NA	ORSL:hAT-Tip100:DNA	0	30.8979	0	0	0	0	38.8154	3.13341	7.3881	0	0	0	231.476	6.38257	0	0	15.9386	9.36603	6.94927	3.13247	0	46.4443	13.4407	45.9875	0	31.8134	0.649327	0	0	0	1.46179	1.34759	0	0	2.32687	0
Kanga1c:TcMar-Tc2:DNA	13.5494	6.17835	1.96912	3.13762	0.00170327	0.0253087	Kanga1c	TcMar-Tc2	DNA	Up	8cWT-8cKO	8cKO-2cKO	Kanga1c:TcMar-Tc2:DNA	0	69.7183	0	0	0	11.8983	2.21802	0	94.5676	37.112	0	0.496213	49.1887	23.7896	0	11.7235	1.09921	4.32278	85.5295	86.1428	0	0	0	15.3292	0	7.15801	0	0	0	0	0.584715	0.449198	0	0	0	0
L1Md_A:L1:LINE	5916.65	-0.998845	0.302816	-3.29852	0.00097197	0.0166671	L1Md_A	L1	LINE	Down	8cWT-2cWT:8cKO-2cKO	8cWT-8cKO	L1Md_A:L1:LINE	2273.46	2284.46	2570.58	3583.48	2115.3	2486.75	3965.82	6096.36	5178.56	9605.27	6007.9	4564.66	7965.67	5108.96	2989.82	2700.13	3613.12	3908.51	4051.43	2868.82	2472.42	2981.5	4130.55	4405.12	1851.35	14757.4	1915.51	2543.72	3031.88	14218.3	11730	12445.5	9108.3	10315.7	13305.1	15022
L1MEh:L1:LINE	8.55559	6.88281	1.93965	3.54848	0.000387458	0.0085437	L1MEh	L1	LINE	Up	8cWT-8cKO:8cWT-2cWT	8cKO-2cKO	L1MEh:L1:LINE	0	0	0.889166	4.49622	0	0	159.698	8.77355	1.47762	0	0	56.072	7.23363	2.32093	0	13.3222	30.2284	0	18.7096	0	1.89748	0	0	0.806799	0	10.3393	0	0	0	0	0.292358	0	0	0	0	0
RLTR6-int:ERV1:LTR	7795.6	-1.93035	0.355734	-5.42639	5.75051e-08	6.29814e-06	RLTR6-int	ERV1	LTR	Down	NA	2cWT-2cKO:8cWT-8cKO:8cWT-2cWT:8cKO-2cKO	RLTR6-int:ERV1:LTR	7250.8	5114.79	6044.55	5723.68	5084.37	3466.88	693.132	334.022	1181.11	867.072	1612.55	500.679	1218.14	923.732	10084.4	21208.3	3898.36	11982	2479.29	16858.9	17313.6	17157.2	27459.4	14308.2	18150.7	11267.5	12298.9	21929.3	14098.5	1317.31	2641.74	3731.49	2259.79	5066.61	6255.63	2682.89
MuRRS-int:ERV1:LTR	1022.67	-1.73615	0.436854	-3.97421	7.06125e-05	0.0022365	MuRRS-int	ERV1	LTR	Down	NA	2cWT-2cKO:8cWT-8cKO:8cKO-2cKO	MuRRS-int:ERV1:LTR	447.532	270.555	279.198	292.254	25.4855	269.2	198.513	157.297	191.598	47.2335	538.606	76.4168	118.631	304.623	1346.69	1094.55	1724.12	1495.68	2026.51	2006.34	1367.13	1947.26	2751.81	2980.32	1278.58	4783.14	1184.37	1982.04	1188.37	1476.9	654.881	203.487	338.559	456.66	397.895	612.4
MER89:ERV1:LTR	1982.33	-1.88504	0.510768	-3.6906	0.000223727	0.00551415	MER89	ERV1	LTR	Down	NA	8cWT-8cKO:8cWT-2cWT:8cKO-2cKO	MER89:ERV1:LTR	924.64	713.028	1529.37	2374	2692.97	684.155	461.349	160.431	725.018	33.7382	830.758	53.591	81.0166	121.849	5264.24	1810.21	4372.12	3507.94	3651.04	5770.53	4573.88	1981.24	2440.55	3047.68	1813.66	244.168	5977.7	4329.99	4045.44	550.723	780.887	773.07	1037.94	1208.69	1978.18	1093.57
RLTR6B_Mm:ERV1:LTR	1612.03	-1.64725	0.469348	-3.50966	0.000448685	0.00952548	RLTR6B_Mm	ERV1	LTR	Down	NA	2cWT-2cKO:8cWT-8cKO:8cWT-2cWT:8cKO-2cKO	RLTR6B_Mm:ERV1:LTR	1408.75	996.655	1327.52	723.891	577.672	899.812	7.76308	70.8151	304.39	114.71	47.332	103.708	617.752	110.244	1926.22	5254.79	973.354	3992.09	970.225	2828.1	3479.98	2935.05	5525.55	2740.29	4807.61	2137.06	2862.88	4731.28	2861.08	343.164	412.224	581.262	292.871	582.67	1135.85	473.881
MuRRS4-int:ERV1:LTR	614.999	-1.244	0.354919	-3.50502	0.000456574	0.00965579	MuRRS4-int	ERV1	LTR	Down	8cKO-2cKO	2cWT-2cKO:8cWT-8cKO	MuRRS4-int:ERV1:LTR	294.204	285.211	352.999	386.675	25.4855	351.001	515.69	360.969	232.479	472.335	564.72	322.538	828.973	423.57	436.765	864.874	357.794	645.535	352.809	277.223	294.109	703.461	755.51	890.303	654.81	1356.84	237.004	475.69	237.354	963.997	1251	1114.01	1281.6	1087.72	1231.58	871.212
RLTR4_MM-int:ERV1:LTR	2792	-0.925892	0.269635	-3.43387	0.000595033	0.0116872	RLTR4_MM-int	ERV1	LTR	Down	NA	2cWT-2cKO:8cWT-8cKO	RLTR4_MM-int:ERV1:LTR	968.226	1716.81	1762.33	2436.95	2463.6	1505.14	2699.33	937.516	1445.6	2520.24	1041.3	1638.49	1494.47	1069.95	2487.54	1964.75	2308.35	2143.38	4485.49	4574.45	2702.01	4456.38	4536.6	4608.84	2646.59	7259.01	2589.52	5629.6	2824.99	3378.14	2459.6	3661.86	2798.68	3543.4	2153.69	3703.56
RLTR6_Mm:ERV1:LTR	291.881	-1.62138	0.49946	-3.24627	0.00116927	0.0191839	RLTR6_Mm	ERV1	LTR	Down	NA	8cWT-8cKO:8cWT-2cWT	RLTR6_Mm:ERV1:LTR	417.956	179.049	371.671	714.898	233.617	141.293	144.171	69.5617	132.001	47.2335	70.1819	18.8561	57.869	35.9745	300.883	385.277	370.985	692.365	144.331	551.314	151.798	512.02	995.321	394.928	313.363	702.28	232.459	417.143	218.109	42.4343	321.301	172.043	50.3739	111.897	140.277	856.631
MER52-int:ERV1:LTR	33.3703	-4.80001	1.60694	-2.98705	0.0028168	0.0359724	MER52-int	ERV1	LTR	Down	NA	8cWT-8cKO	MER52-int:ERV1:LTR	0	0	0	13.4887	0	1.48729	0	3.13341	0.49254	0	0	0.496213	0	29.0117	0	5.32886	17.5874	1.44093	11.2257	0.522078	0	0	0	18.9598	0.739063	61.2407	26.6224	87.2098	0	18.4497	48.8237	10.7807	214.382	0	1.32964	0
LTRIS_Mus:ERV1:LTR	216.176	-1.69386	0.584383	-2.89854	0.00374909	0.0435411	LTRIS_Mus	ERV1	LTR	Down	NA	8cWT-8cKO	LTRIS_Mus:ERV1:LTR	112.856	195.29	44.4583	49.4584	178.399	343.565	28.8343	8.14687	171.896	13.4953	22.8499	247.61	138.886	77.7513	72.7942	290.956	423.198	128.243	306.303	267.826	210.62	331.907	227.077	261.403	161.116	742.047	166.877	331.763	125.894	252.761	362.523	481.54	145.264	100.808	368.643	7.29047
RMER21A:ERV1:LTR	138.329	1.94148	0.665593	2.91691	0.00353516	0.0416512	RMER21A	ERV1	LTR	Up	8cWT-8cKO	8cKO-2cKO	RMER21A:ERV1:LTR	61.487	68.1338	67.5766	143.879	16.9904	69.9028	110.901	129.097	14.7762	377.868	143.628	16.8712	322.62	186.835	240.221	99.6497	425.396	157.782	177.474	174.374	205.877	44.1787	100.452	217.432	157.42	874.867	85.0618	15.2465	82.5928	1.84497	80.9831	71.8717	36.316	89.7192	32.9086	0
IAPLTR2a:ERVK:LTR	596.936	-3.6224	0.427326	-8.4769	2.3127e-17	1.91237e-14	IAPLTR2a	ERVK	LTR	Down	NA	2cWT-2cKO:8cWT-8cKO	IAPLTR2a:ERVK:LTR	228.047	130.722	224.07	22.4811	72.209	110.06	8.87209	129.723	133.478	43.8597	29.3785	20.8409	164.927	39.4559	856.95	880.328	826.06	777.38	1239.11	1614.79	948.74	659.282	442.129	1205.36	629.682	997.349	896.071	879.416	789.042	906.802	516.596	478.845	857.527	974.814	560.777	678.014
RLTR19:ERVK:LTR	367.212	-2.94267	0.486244	-6.05184	1.43197e-09	2.3682e-07	RLTR19	ERVK	LTR	Down	NA	8cWT-8cKO:8cWT-2cWT	RLTR19:ERVK:LTR	266.963	74.0757	500.6	804.823	157.161	159.14	46.5785	101.522	116.732	60.7288	16.3214	38.7046	98.3773	189.736	319.89	666.108	335.81	653.46	152.349	521.034	137.567	903.964	360.777	200.086	325.927	204.401	287.652	270.167	408.954	428.955	250.843	397.091	358.474	580.654	245.984	823.824
IAPLTR1a_Mm:ERVK:LTR	954.4	-2.31152	0.395369	-5.84649	5.02042e-09	6.97712e-07	IAPLTR1a_Mm	ERVK	LTR	Down	NA	2cWT-2cKO:8cWT-8cKO	IAPLTR1a_Mm:ERVK:LTR	118.304	340.273	255.191	553.035	225.122	255.814	557.833	109.669	209.329	337.382	42.4356	97.7539	607.625	139.256	942.685	913.9	1402.6	719.023	1737.85	1115.68	1002.82	1455.63	2227.62	2229.99	1869.83	2012.99	963.601	1668.57	780.221	1011.04	1816.42	1334.12	1046.14	1269.17	551.801	991.505
IAP1-MM_LTR:ERVK:LTR	472.742	-3.36864	0.64276	-5.2409	1.59797e-07	1.57737e-05	IAP1-MM_LTR	ERVK	LTR	Down	NA	8cWT-8cKO:8cWT-2cWT	IAP1-MM_LTR:ERVK:LTR	192.244	1.98063	126.262	256.284	1193.57	215.658	38.8154	33.8408	9.85079	77.5979	17.9535	0.992425	78.1232	82.3932	534.633	962.393	1053.6	482.711	632.918	856.208	380.445	1282.32	972.684	1156.95	1225.37	468.452	355.182	1140.44	161.978	339.474	197.926	257.39	420.563	284.279	103.047	309.845
MMERVK10C-int:ERVK:LTR	12106.6	-1.63141	0.323989	-5.03539	4.7688e-07	3.82319e-05	MMERVK10C-int	ERVK	LTR	Down	8cWT-2cWT:8cKO-2cKO	8cWT-8cKO	MMERVK10C-int:ERVK:LTR	3540.56	1926.76	3133.42	6919.68	3784.6	3200.66	10298.3	7366.65	5942.98	27739.6	8878.83	7143.97	7240.86	6344.27	5144.12	4649.43	5705.47	6267.31	8498.96	5558.04	6568.13	4848.33	5841.05	5926.75	4323.52	16522.3	3266.76	6857.86	3743.14	17616.7	34330.4	26724.1	20858.3	38223.4	37321.1	22421.9
RLTR10:ERVK:LTR	3904.63	-1.90272	0.390769	-4.86917	1.12065e-06	7.78712e-05	RLTR10	ERVK	LTR	Down	NA	2cWT-2cKO:8cWT-8cKO	RLTR10:ERVK:LTR	881.054	1223.64	657.094	2495.4	1597.09	1851.68	594.43	637.336	1412.6	1339.41	1098.43	1181.98	1383.07	923.151	3744.86	4848.2	3504.84	1501.45	3747.8	9631.29	4316.77	7701.82	7538.12	9406.47	5819.38	11153	4959.56	11707.5	5526.5	2324.66	1360.63	3934.07	1900.15	4330.71	1358.23	5482.44
IAPEY3-int:ERVK:LTR	736.075	-2.30408	0.498203	-4.62478	3.75003e-06	0.000217607	IAPEY3-int	ERVK	LTR	Down	NA	2cWT-2cKO:8cWT-8cKO	IAPEY3-int:ERVK:LTR	421.069	259.067	58.6849	481.095	12.7428	142.78	293.888	202.418	243.315	165.317	48.9641	202.455	380.489	57.4431	664.449	552.603	833.204	630.406	1098.52	1215.92	996.177	1382	1517.39	1414.32	356.229	3959.17	363.623	1083.72	319.145	613.452	639.971	574.075	902.043	1593.78	1232.25	1381.54
RLTR10-int:ERVK:LTR	12879.5	-1.71202	0.386	-4.43528	9.19506e-06	0.000441768	RLTR10-int	ERVK	LTR	Down	NA	2cWT-2cKO:8cWT-8cKO:8cKO-2cKO	RLTR10-int:ERVK:LTR	3594.27	3914.13	1797	8911.5	6269.44	6103.85	1858.7	2018.54	3437.93	7064.78	3538.48	3534.03	3524.22	3171.56	15934.3	14003.7	12569	4695.26	10448.5	36173.2	13456	26703.2	25506.2	34415.6	18614	34704.4	17250	41072.1	20027.5	5205.58	5814.41	12395.6	8589.33	12567.7	5171.31	13042.7
RLTR27:ERVK:LTR	160.494	-1.92749	0.477418	-4.03733	5.40635e-05	0.00180362	RLTR27	ERVK	LTR	Down	NA	2cWT-2cKO:8cWT-8cKO	RLTR27:ERVK:LTR	72.3834	73.6796	163.607	94.4206	0	116.009	78.7398	23.1872	8.37318	50.6073	50.5963	74.4319	15.914	109.084	174.302	120.432	115.967	68.444	379.537	428.626	72.1043	302.454	108.941	362.656	264.585	221.898	209.733	451.295	147.544	125.458	146.471	164.856	146.436	193.551	168.532	346.298
RMER19A:ERVK:LTR	513.267	-1.60086	0.400268	-3.99948	6.34831e-05	0.0020586	RMER19A	ERVK	LTR	Down	NA	2cWT-2cKO:8cWT-8cKO	RMER19A:ERVK:LTR	433.522	189.349	205.397	503.576	263.351	278.124	301.651	57.6547	264.494	37.112	39.1713	202.455	96.9306	234.995	632.501	505.176	471.563	645.535	605.121	918.335	785.557	785.022	618.981	565.97	773.799	2991.25	479.203	682.432	639.092	255.528	294.404	504.898	591.6	609.889	389.585	411.912
MYSERV16_I-int:ERVK:LTR	633.62	-2.02195	0.543341	-3.72133	0.00019818	0.00504231	MYSERV16_I-int	ERVK	LTR	Down	8cKO-2cKO	8cWT-8cKO	MYSERV16_I-int:ERVK:LTR	466.99	167.562	39.1233	224.811	80.7042	502.705	225.129	302.687	649.66	151.822	91.3997	364.716	708.895	293.018	215.956	193.971	665.025	323.488	192.441	493.364	876.636	428.194	394.733	624.462	417.571	1729.85	379.856	562.289	328.767	377.296	360.769	4406.63	705.234	402.224	456.4	1337.8
RLTR10C:ERVK:LTR	1219.53	-1.41574	0.381024	-3.71561	0.000202713	0.0051261	RLTR10C	ERVK	LTR	Down	8cWT-2cWT:8cKO-2cKO	8cWT-8cKO	RLTR10C:ERVK:LTR	396.941	266.989	264.082	548.538	407.769	176.988	703.113	951.93	900.363	3846.16	520.652	613.319	1205.12	688.157	386.214	527.557	269.308	312.681	921.581	893.275	495.242	370.421	615.444	789.856	413.136	1284.46	214.927	678.163	335.182	2706.57	3369.13	2410.84	2068.84	2397.22	3667.82	2092.37
IAPLTR3-int:ERVK:LTR	305.194	-2.44385	0.672534	-3.63379	0.00027929	0.00658902	IAPLTR3-int	ERVK	LTR	Down	NA	2cWT-2cKO:8cWT-8cKO	IAPLTR3-int:ERVK:LTR	98.0679	209.947	204.508	22.4811	4.24759	28.2586	12.1991	55.148	103.926	26.9906	11.425	22.8258	206.882	254.142	52.5736	184.379	98.9293	213.978	554.873	562.8	232.441	378.351	319.748	904.018	314.102	1788.71	237.654	329.933	70.5647	269.366	564.835	621.69	50.3739	618.961	709.032	204.133
IAPEz-int:ERVK:LTR	45846.1	-1.30125	0.360211	-3.61247	0.000303291	0.00704507	IAPEz-int	ERVK	LTR	Down	NA	2cWT-2cKO:8cWT-8cKO	IAPEz-int:ERVK:LTR	8384.8	15283.8	12340.7	33780.1	24746.5	19126.6	24570.1	22521.1	17147.8	78819.2	19820.7	12497.1	21870.1	21786	32687	35544	52064.3	18000.8	68322	55280.2	30005.8	54449.7	69552.9	75356.2	36868.9	128671	40138.8	74216.1	52695.8	83818.8	97673.5	61055	44381.7	57507	31223.7	51718.6
ETnERV2-int:ERVK:LTR	829.765	-1.30223	0.362481	-3.59254	0.000327469	0.00753225	ETnERV2-int	ERVK	LTR	Down	2cWT-2cKO:8cKO-2cKO	8cWT-8cKO	ETnERV2-int:ERVK:LTR	578.289	728.477	539.724	1146.54	182.646	614.252	967.058	806.54	485.644	1163.97	305.21	699.164	1297.71	1026.43	182.39	84.7289	224.789	95.1012	314.321	322.122	227.698	356.828	38.9073	173.462	178.853	426.299	258.432	404.946	242.967	2328.35	2722.73	2974.59	1487.79	2240.96	1996.13	1377.9
RLTR13D5:ERVK:LTR	482.245	-2.12567	0.646035	-3.29034	0.00100067	0.0170433	RLTR13D5	ERVK	LTR	Down	NA	2cWT-2cKO:8cWT-8cKO	RLTR13D5:ERVK:LTR	240.5	231.338	215.178	526.057	21.238	7.43647	67.6497	53.268	97.5229	428.475	4.89641	18.3599	47.7419	4.06163	1241.14	601.629	1276.74	1047.55	610.467	916.769	773.223	338.703	1034.94	922.575	1406.44	923.383	822.048	311.028	534.046	202.947	209.913	447.401	326.844	476.822	192.133	58.3238
RLTR10B2:ERVK:LTR	188.169	-2.04546	0.633383	-3.22942	0.0012404	0.020033	RLTR10B2	ERVK	LTR	Down	8cKO-2cKO	8cWT-8cKO	RLTR10B2:ERVK:LTR	59.1521	61.3996	102.254	4.49622	0	227.556	364.865	50.1346	125.598	6.74764	42.4356	92.7918	17.3607	162.465	47.3162	145.478	86.2883	71.3259	106.377	210.919	86.3354	345.5	114.6	243.25	48.0391	156.681	10.3892	309.808	94.6208	626.367	410.762	461.326	159.322	602.832	733.298	382.75
RLTR20B3A_MM:ERVK:LTR	107.87	-2.37682	0.739867	-3.21249	0.0013159	0.0209656	RLTR20B3A_MM	ERVK	LTR	Down	8cKO-2cKO	8cWT-8cKO	RLTR20B3A_MM:ERVK:LTR	23.3495	91.1092	58.6849	4.49622	271.846	185.912	4.43604	68.935	180.27	16.8691	22.8499	86.341	21.7009	30.1721	72.7942	4.79598	39.0221	7.20463	111.723	10.9636	8.53866	47.5771	73.5703	54.4589	2.21719	99.4168	32.4663	23.1746	56.131	104.241	196.757	103.765	28.1156	64.5171	90.0833	743.628
RLTR13A1:ERVK:LTR	48.3782	-3.51095	1.12077	-3.13263	0.00173249	0.0256508	RLTR13A1	ERVK	LTR	Down	NA	8cWT-8cKO	RLTR13A1:ERVK:LTR	6.22653	63.7764	40.9016	4.49622	0	1.48729	0	3.76009	0	6.74764	0	6.94698	34.7214	0.580233	0.404412	104.979	2.74804	114.554	0.534559	2.61039	257.109	69.1	8.48888	36.7094	54.6907	202.81	135.709	1.82958	40.0936	0.922485	28.0663	77.7112	127.692	84.6788	229.031	0
MMERVK9E_I-int:ERVK:LTR	893.951	-1.32269	0.423555	-3.12282	0.00179127	0.0262391	MMERVK9E_I-int	ERVK	LTR	Down	NA	2cWT-2cKO:8cWT-8cKO	MMERVK9E_I-int:ERVK:LTR	247.505	251.144	423.243	687.921	29.7331	187.399	485.747	243.153	505.838	1572.2	406.402	531.94	523.714	362.066	604.596	473.203	711.741	1314.85	1061.64	1302.06	629.015	601.51	942.973	1028.67	721.326	3888.39	707.766	589.733	488.34	1226.9	1228.19	1647.66	1262.86	2067.57	1194.35	1592.97
IAP-d-int:ERVK:LTR	246.678	-1.72395	0.559599	-3.0807	0.00206517	0.029186	IAP-d-int	ERVK	LTR	Down	NA	2cWT-2cKO:8cWT-8cKO	IAP-d-int:ERVK:LTR	143.989	53.081	39.1233	44.9622	4.24759	25.284	144.171	85.8554	92.1049	20.2429	4.89641	101.724	125.865	138.676	296.03	358.632	489.7	263.69	183.888	357.101	310.238	289.994	334.603	363.463	142.639	1555.67	236.355	279.315	268.627	353.312	289.434	278.503	99.5762	250.004	584.378	7.29047
IAPEY5_I-int:ERVK:LTR	82.3669	-1.97833	0.657712	-3.0079	0.00263058	0.0342327	IAPEY5_I-int	ERVK	LTR	Down	NA	8cWT-8cKO	IAPEY5_I-int:ERVK:LTR	89.5064	47.1391	140.488	26.9773	21.238	16.3602	9.9811	38.8543	15.2687	33.7382	21.2178	15.3826	13.0205	39.4559	36.3971	54.3544	39.5717	25.9367	282.247	150.88	94.874	33.9836	222.126	236.796	22.911	474.814	24.0251	45.1295	21.6505	173.427	69.5811	21.1123	17.5723	66.5333	52.5209	25.5167
RMER17C-int:ERVK:LTR	185.301	-2.22795	0.740708	-3.00787	0.0026309	0.0342327	RMER17C-int	ERVK	LTR	Down	NA	8cWT-8cKO	RMER17C-int:ERVK:LTR	77.0533	29.3134	15.1158	705.906	50.9711	28.2586	13.3081	93.3756	28.5673	0	86.5033	122.068	140.332	22.6291	343.346	203.03	117.616	438.042	31.539	32.3688	65.4631	218.628	146.433	168.621	19.9547	648.197	153.89	421.412	37.688	224.164	107.003	139.701	306.929	133.067	379.613	69.2595
ETnERV3-int:ERVK:LTR	1469.65	-1.54162	0.521387	-2.95676	0.00310893	0.0381597	ETnERV3-int	ERVK	LTR	Down	8cWT-2cWT:8cKO-2cKO	2cWT-2cKO:8cWT-8cKO	ETnERV3-int:ERVK:LTR	123.752	30.1056	22.2291	49.4584	33.9807	35.695	916.043	707.524	376.793	4224.02	4095.03	679.811	545.415	1225.45	262.059	216.885	292.391	227.666	220.238	125.299	256.16	108.748	122.381	261.403	461.915	1041.89	73.3739	74.4027	416.973	3665.95	3926.95	3951.14	2697.93	5759.16	8327.22	965.988
ERVB2_1A-I_MM-int:ERVK:LTR	93.0135	-2.3737	0.823177	-2.88359	0.00393173	0.0451548	ERVB2_1A-I_MM-int	ERVK	LTR	Down	8cWT-2cWT:8cKO-2cKO	2cWT-2cKO:8cWT-8cKO	ERVB2_1A-I_MM-int:ERVK:LTR	17.9013	1.98063	1.77833	4.49622	0	0	4.43604	70.1884	91.6124	43.8597	78.3426	48.6288	10.1271	97.4792	20.2206	162.53	112.12	10.0865	1.60368	28.7143	0.94874	37.382	0.707406	62.9303	77.6017	87.4867	3.89596	54.8873	0	83.0236	250.55	379.572	234.297	390.127	282.549	513.978
RLTR9B:ERVK:LTR	19.6901	5.01494	1.68796	2.97101	0.00296822	0.03716	RLTR9B	ERVK	LTR	Up	8cWT-8cKO	2cWT-2cKO:8cKO-2cKO	RLTR9B:ERVK:LTR	0	0.396127	1.77833	8.99243	0	0	0	0.626682	0	0	0	0	49.1887	2.32093	87.7575	45.8282	59.3576	0	0	19.3169	0	109.88	1.41481	4.43739	127.119	14.316	5.84394	153.074	36.8861	0	0	0	0	0	0	0
MERVL-int:ERVL:LTR	403401	-3.06936	0.329221	-9.3231	1.12987e-20	2.07619e-17	MERVL-int	ERVL	LTR	Down	NA	2cWT-2cKO:8cWT-8cKO:8cWT-2cWT:8cKO-2cKO	MERVL-int:ERVL:LTR	104936	156055	256226	273015	400552	222883	29474.2	12360.7	10580.7	19480.4	16953	14995.5	31761.4	14662.5	503832	828850	932639	628298	1.05704e+06	1.22335e+06	702380	606772	1.2245e+06	895008	999523	778913	334840	805605	578983	61990.1	59870.7	83712.1	183280	220971	104990	189709
MT2_Mm:ERVL:LTR	42795.3	-2.64921	0.291577	-9.0858	1.0294e-19	1.30955e-16	MT2_Mm	ERVL	LTR	Down	NA	2cWT-2cKO:8cWT-8cKO:8cWT-2cWT:8cKO-2cKO	MT2_Mm:ERVL:LTR	12371.3	14598.5	25584.9	26635.6	42841.2	22452.2	2291.22	1081.03	1961.79	3036.44	1723.54	2221.54	2945.53	2392.88	58038.4	81186.3	103028	77745.9	109641	132967	74224.7	61736.9	118769	110321	97151.4	108694	36100	80738.5	60205.3	6228.62	6196.81	8165.52	15325.4	22271.5	12857.3	17387.8
MERVL_2A-int:ERVL:LTR	18298.5	-2.20848	0.314682	-7.01812	2.24868e-12	7.29189e-10	MERVL_2A-int	ERVL	LTR	Down	NA	2cWT-2cKO:8cWT-8cKO:8cWT-2cWT:8cKO-2cKO	MERVL_2A-int:ERVL:LTR	4588.95	7369.54	12782.6	13335.8	20940.6	9597.5	2279.02	1071.63	1357.93	1450.74	2534.71	1595.82	1821.43	1503.97	21239.7	36486.7	39574.5	29100.2	44899.8	55770.4	29245.9	27577.7	54043	40338.3	42342.4	36468.5	15285.8	31463.8	28006.2	3812.63	3134.66	4000.56	9089.55	11196.7	5096.85	9484.91
MT2B2:ERVL:LTR	2326.8	-1.34033	0.227429	-5.8934	3.78338e-09	5.44083e-07	MT2B2	ERVL	LTR	Down	NA	2cWT-2cKO:8cWT-8cKO:8cWT-2cWT:8cKO-2cKO	MT2B2:ERVL:LTR	978.344	1262.85	2420.31	1731.04	1287.02	1180.91	802.924	778.966	870.81	435.223	1481.98	917.001	933.138	838.437	4077.29	3199.98	3168.49	2521.62	5180.95	5804.46	3468.59	2145.5	2304.73	4769.39	2774.44	3886	3053.78	2505.3	3403.14	2126.33	1721.69	2212.75	1575.65	2864.96	1928.98	2974.51
ERVL-int:ERVL:LTR	84.3672	-2.5674	0.755065	-3.40024	0.000673265	0.0128871	ERVL-int	ERVL	LTR	Down	NA	8cWT-8cKO:8cWT-2cWT:8cKO-2cKO	ERVL-int:ERVL:LTR	53.7038	36.8398	30.2316	89.9243	33.9807	60.979	0	0.626682	36.9405	0	0	0	7.23363	17.407	89.3751	95.9195	153.89	136.168	214.893	180.639	424.087	74.764	258.203	270.278	117.511	89.0774	14.2852	101.236	140.328	4.61242	16.9567	26.5027	171.037	44.3555	46.2051	3.64524
LTR101_Mam:ERVL:LTR	22.225	-5.405	1.86681	-2.89531	0.00378782	0.043837	LTR101_Mam	ERVL	LTR	Down	NA	8cWT-8cKO:8cWT-2cWT	LTR101_Mam:ERVL:LTR	60.7087	0	0	0	361.045	153.191	0	0	0	0	1.63214	0	0	0.580233	0	0	0.549607	0	2.6728	0.522078	3.79496	0	0.707406	10.085	2.95625	120.891	0.649327	0.609858	0	0	19.0032	11.2299	0	64.5171	6.98062	0
ORR1A0-int:ERVL-MaLR:LTR	63449.2	-3.66028	0.303988	-12.0409	2.16667e-33	3.58324e-29	ORR1A0-int	ERVL-MaLR	LTR	Down	NA	8cWT-8cKO:8cWT-2cWT	ORR1A0-int:ERVL-MaLR:LTR	27308	23834.6	67063.6	89704	52428	80208.2	9234.74	5028.5	4987.46	8060.06	4646.7	4002.45	8800.43	6293.79	63269.5	113049	78100.3	61653.7	65478.2	120386	84073.6	88969.1	139152	102180	137498	35149.8	63947	90712.8	66943.4	36502.7	42821.6	57331.6	79446.6	88246.4	74810.7	101990
ORR1A0:ERVL-MaLR:LTR	6577.88	-3.08515	0.260099	-11.8615	1.87684e-32	1.03464e-28	ORR1A0	ERVL-MaLR	LTR	Down	NA	8cWT-8cKO:8cWT-2cWT	ORR1A0:ERVL-MaLR:LTR	3212.11	2804.97	5326.99	11946.4	7853.8	8377.92	845.066	822.207	692.018	843.455	636.534	616.296	1043.09	967.829	6925.97	13668.5	7586.23	11174.4	7976.16	11575.5	7369.81	10619.9	13207.3	11604.6	12076.3	6485.95	6432.23	9358.89	6428.6	3055.27	4354.67	6761.78	6618.89	7032.37	8166.33	7516.48
ORR1A1-int:ERVL-MaLR:LTR	40705.6	-3.37403	0.289853	-11.6405	2.56513e-31	1.06055e-27	ORR1A1-int	ERVL-MaLR	LTR	Down	NA	8cWT-8cKO:8cWT-2cWT	ORR1A1-int:ERVL-MaLR:LTR	22363.4	15586	33317	51994.3	32235	42945.6	7387.12	4729.57	5750.4	9446.7	5438.28	4522.48	6478.43	5752.43	49442.2	75317.1	32701.1	45944	30775.7	62123.1	53745.2	56631.4	64783.6	39655.4	82234.8	16325	45986.6	38205.8	51069.6	36702.9	32027.8	46825.7	58295.4	62582.6	48427.2	98282.9
ORR1A1:ERVL-MaLR:LTR	3839.55	-2.17151	0.247961	-8.75749	1.99639e-18	1.94214e-15	ORR1A1	ERVL-MaLR	LTR	Down	NA	2cWT-2cKO:8cWT-8cKO:8cWT-2cWT	ORR1A1:ERVL-MaLR:LTR	1769.89	1588.07	3693.59	4941.34	3550.99	3234.86	1875.34	962.584	1440.68	867.072	569.616	986.471	873.822	912.127	4911.18	7634.66	3361.95	6861.69	3137.33	5152.91	4739.91	6060.41	7490.02	4841.6	5490.5	3656.95	5312.14	3727.45	4120.02	2990.7	3429.06	4368	4859.32	4671.44	6067.49	4447.19
MTA_Mm-int:ERVL-MaLR:LTR	999114	-3.0313	0.363385	-8.34183	7.315e-17	5.76074e-14	MTA_Mm-int	ERVL-MaLR	LTR	Down	NA	2cWT-2cKO:8cWT-8cKO:8cWT-2cWT:8cKO-2cKO	MTA_Mm-int:ERVL-MaLR:LTR	366227	332357	307201	1.08899e+06	593499	575733	38381.8	32595.6	33883.8	40475.7	23638.3	14761.3	33051.9	23492.5	2.03485e+06	2.07557e+06	2.95762e+06	1.51521e+06	2.0566e+06	3.23781e+06	1.6179e+06	2.29061e+06	1.75567e+06	1.94608e+06	1.90203e+06	3.82987e+06	1.32931e+06	1.58978e+06	1.3596e+06	157423	58623.8	149121	215005	183965	69774.6	429088
ORR1A2-int:ERVL-MaLR:LTR	12274.7	-1.78119	0.219955	-8.09798	5.58812e-16	3.69665e-13	ORR1A2-int	ERVL-MaLR	LTR	Down	NA	2cWT-2cKO:8cWT-8cKO:8cWT-2cWT:8cKO-2cKO	ORR1A2-int:ERVL-MaLR:LTR	7155.06	6565.4	13720.7	10143.5	9365.94	9936.61	4867.45	1972.17	3962.97	3616.74	3576.01	2726.19	4121.72	2817.61	18343.7	25396.8	19821	16531	16038.4	20923.8	18413.2	18201.6	21118.2	14841.9	26880.5	16189.8	12608.6	14681.7	14486.6	8600.33	6762.52	11775.3	11126.8	9136.23	11697.2	10607.6
MT-int:ERVL-MaLR:LTR	37586.6	-2.76336	0.364122	-7.58911	3.2211e-14	1.47974e-11	MT-int	ERVL-MaLR	LTR	Down	NA	2cWT-2cKO:8cWT-8cKO:8cWT-2cWT:8cKO-2cKO	MT-int:ERVL-MaLR:LTR	16382.8	15754.4	16474.5	46846.1	32358.1	26351.9	1950.75	1497.14	1460.87	1761.13	1150.66	659.963	2008.05	1683.26	78125.6	74433	96722.6	58419.5	72916.6	120193	70280.8	74087.7	72295.5	63004.6	69376.6	136502	43819.2	60852.3	50643.8	6067.18	2628.88	5485.6	9394.14	7283.38	2918.9	18831.3
MTA_Mm:ERVL-MaLR:LTR	168459	-2.31612	0.331232	-6.99244	2.7014e-12	8.5915e-10	MTA_Mm	ERVL-MaLR	LTR	Down	NA	2cWT-2cKO:8cWT-8cKO:8cWT-2cWT:8cKO-2cKO	MTA_Mm:ERVL-MaLR:LTR	65748.3	61861.5	57435.7	186449	102439	105763	7582.31	7998.34	7274.81	10118.1	6301.69	3593.08	8746.9	5929.99	334746	334308	500483	398411	353454	508676	237632	402052	279745	348279	295186	624711	222398	249880	219155	22629.5	11501.6	26419.6	34781.4	26675.8	13502.5	54015.1
ORR1A3-int:ERVL-MaLR:LTR	2370.95	-1.89977	0.299116	-6.35129	2.13513e-10	4.52701e-08	ORR1A3-int	ERVL-MaLR	LTR	Down	NA	2cWT-2cKO:8cWT-8cKO:8cWT-2cWT:8cKO-2cKO	ORR1A3-int:ERVL-MaLR:LTR	1302.9	1093.31	3021.39	2216.63	1503.65	1915.63	833.976	467.505	845.198	408.232	287.256	378.114	776.891	635.936	3100.63	4573.23	3628.51	2924.36	3079.6	3877.99	3072.02	3664.57	4261.42	3233.25	5006.42	6023.86	2128.49	3092.59	2992.58	952.004	1213.28	1577.13	1220.69	2282.29	1741.83	2697.48
ORR1C1-int:ERVL-MaLR:LTR	269.97	-2.46094	0.457975	-5.37353	7.7209e-08	8.34564e-06	ORR1C1-int	ERVL-MaLR	LTR	Down	8cKO-2cKO	2cWT-2cKO:8cWT-8cKO	ORR1C1-int:ERVL-MaLR:LTR	33.4676	90.713	198.284	44.9622	67.9615	101.136	31.0523	65.1749	93.5825	13.4953	79.9748	37.216	361.681	162.465	195.736	184.912	231.934	100.144	196.183	322.644	76.848	252.612	372.096	309.407	329.622	654.56	201.291	300.66	197.26	474.157	364.278	554.759	678.29	339.723	348.699	765.5
ORR1A4-int:ERVL-MaLR:LTR	2032.66	-1.25028	0.261156	-4.78748	1.68893e-06	0.000112615	ORR1A4-int	ERVL-MaLR	LTR	Down	NA	2cWT-2cKO:8cWT-8cKO:8cWT-2cWT	ORR1A4-int:ERVL-MaLR:LTR	1205.61	1228.39	1519.58	3025.95	1333.74	1006.9	991.456	1080.4	641.287	576.923	985.812	1008.3	1359.92	811.747	2815.52	2835.49	2388.04	1750.73	2377.72	2147.83	2400.31	2468.34	2122.22	2728.59	3857.17	5965.8	1853.83	2268.67	2677.45	1502.73	1314.15	2032.17	2670.99	2476.85	1267.81	3966.02
MTB-int:ERVL-MaLR:LTR	4016.67	-1.63362	0.363645	-4.49236	7.04374e-06	0.000354071	MTB-int	ERVL-MaLR	LTR	Down	NA	2cWT-2cKO:8cWT-8cKO:8cWT-2cWT:8cKO-2cKO	MTB-int:ERVL-MaLR:LTR	1654.7	1639.96	1484.02	5094.21	1979.38	1930.51	268.381	378.516	561.988	728.745	582.673	159.284	114.291	327.252	7152.03	7452.41	14492	5338.63	7367.83	11468.5	7046.29	8601.25	8107.58	6728.3	7870.29	13528.6	4617.36	7070.7	5164.05	827.469	548.755	623.936	1068.39	1281.27	517.231	1921.04
MTB_Mm-int:ERVL-MaLR:LTR	779.412	-1.24754	0.348701	-3.57769	0.000346643	0.0078639	MTB_Mm-int	ERVL-MaLR	LTR	Down	NA	8cWT-8cKO:8cWT-2cWT:8cKO-2cKO	MTB_Mm-int:ERVL-MaLR:LTR	505.127	464.261	921.176	687.921	1036.41	608.303	238.437	88.3622	276.315	468.961	24.4821	78.4016	228.583	84.7141	1330.92	1053.52	1424.58	1105.91	2476.08	1816.31	982.895	1344.62	986.124	920.961	1337.7	1726.67	1012.95	1145.31	945.407	480.615	250.843	264.128	477.966	461.701	422.494	481.171
MTC-int:ERVL-MaLR:LTR	1244.33	-0.893154	0.28388	-3.14624	0.00165384	0.0247075	MTC-int	ERVL-MaLR	LTR	Down	NA	8cWT-8cKO:8cWT-2cWT:8cKO-2cKO	MTC-int:ERVL-MaLR:LTR	826.572	757.79	812.698	2063.76	1282.77	584.506	714.203	731.965	770.825	215.925	355.806	530.451	833.314	532.654	1203.13	1178.74	2133.57	1652.02	2207.2	1989.64	1646.06	1807.93	1953.86	1821.35	1127.07	3621.95	1223.98	1386.82	1306.25	856.988	879.119	1116.26	861.041	719.769	999.891	1140.96
ORR1A2:ERVL-MaLR:LTR	3166.46	-0.662403	0.221438	-2.99137	0.0027773	0.0356331	ORR1A2	ERVL-MaLR	LTR	Down	NA	8cWT-8cKO	ORR1A2:ERVL-MaLR:LTR	1443	1925.57	2390.97	4446.76	3211.18	2912.12	1657.97	2323.11	2083.94	3370.45	2644.06	2303.42	1697.01	2045.32	4119.75	3690.24	3521.88	3222.63	2920.83	4901.79	2318.72	2720.95	3986.23	3669.32	3789.18	6544.8	2755.09	2958.42	2898.77	3955.61	3882.8	3635.81	1802.92	4451.68	3269.26	2894.32
LTR85a:Gypsy:LTR	21.6613	4.55529	1.34046	3.39831	0.000678036	0.0129335	LTR85a	Gypsy	LTR	Up	8cWT-8cKO	8cKO-2cKO	LTR85a:Gypsy:LTR	0.778316	2.37676	13.3375	0	29.7331	0	16.6352	31.9608	0	0	324.796	4.46591	0	0	0	1.59866	30.2284	2.88185	1.60368	52.7299	24.6672	29.4525	8.48888	39.1298	0.739063	50.9014	1.94798	107.945	4.00936	0.922485	4.09301	0.449198	0	0	0.332411	7.29047
MMSAT4:Satellite:Satellite	4409.47	-1.3452	0.303371	-4.43418	9.24246e-06	0.000441768	MMSAT4	Satellite	Satellite	Down	NA	8cWT-8cKO:8cWT-2cWT	MMSAT4:Satellite:Satellite	1630.57	3563.95	4479.62	4253.42	2667.49	6081.54	1853.16	1953.37	1573.17	2624.83	2994.97	3057.66	970.752	2274.52	8217.66	6913.13	6275.96	7288.21	6675.04	3471.82	3649.8	1389.93	6859.01	3415.99	5148.32	7879.37	2116.16	5590.57	4319.68	4416.86	6911.33	3130.01	4608.62	4866	6746.94	7363.38
B2_Mm1a:B2:SINE	94406.3	-1.54527	0.431754	-3.57906	0.000344832	0.00784434	B2_Mm1a	B2	SINE	Down	8cKO-2cKO	8cWT-8cKO	B2_Mm1a:B2:SINE	25138.8	18846.1	31756.6	50870.2	49280.5	65710.1	51504.7	37734.4	82310.3	69305	48526.7	111603	91519.8	108494	33096.7	43807.5	92201	44222.8	40366.7	43717.8	50483.4	46985.7	79887.4	95982.1	26267.8	167062	32839.7	42285.1	57107.7	63353.5	71420.9	176756	160051	172520	37636.8	511598
B2_Mm1t:B2:SINE	56561.8	-1.50489	0.439075	-3.42742	0.000609343	0.0119258	B2_Mm1t	B2	SINE	Down	8cKO-2cKO	8cWT-8cKO	B2_Mm1t:B2:SINE	13994.1	12894.7	19569.7	27152.7	32328.4	38345.4	29742.6	23679.8	47237	46589.1	31944.2	75085.4	53407.3	56580.9	21288.7	26768.5	56555.7	25936.7	24660.3	29980.3	28436.6	25927.2	52950.1	59653.5	18135.9	110259	17368.2	22826.4	29640.4	37095.9	43261	89381.8	80656.7	104319	25285.5	322323
[truncated: 1 more columns]

## Sheet: FOURWAY_8cWT_vs_2cWT_DE_TEmulti
Figure 1–figure supplement 5–Source Data 1. Differential TE Expression (DTE) – Multimapping Reads. TE expression analysis by DESeq2 (v146.0) using multimapped reads across four comparisons.
tetranscripts_id	baseMean	log2FoldChange	lfcSE	stat	pvalue	padj	gene_id	family_id	class_id	Direction	FOUR_WAY_UP_COMP	FOUR_WAY_DOWN_COMP	tetranscripts_id	TZSC118	TZSC119	TZSC120	TZSC121	TZSC122	TZSC123	TZSC125	TZSC126	TZSC127	TZSC128	TZSC129	TZSC130	TZSC131	TZSC132	TZSC94	TZSC95	TZSC96	TZSC97	TZSC98	TZSC99	TZSC100	TZSC101	TZSC102	TZSC103	TZSC104	TZSC105	TZSC106	TZSC107	TZSC108	TZSC109	TZSC110	TZSC111	TZSC112	TZSC113	TZSC114	TZSC115
														2c WT	2c WT	2c WT	2c WT	2c WT	2c WT	8c WT	8c WT	8c WT	8c WT	8c WT	8c WT	8c WT	8c WT	2c KO	2c KO	2c KO	2c KO	2c KO	2c KO	2c KO	2c KO	2c KO	2c KO	2c KO	2c KO	2c KO	2c KO	2c KO	8c KO	8c KO	8c KO	8c KO	8c KO	8c KO	8c KO
MER105:DNA:DNA	43.4533	3.69248	1.19979	3.07761	0.00208669	0.00968284	MER105	DNA	DNA	Up	8cWT-2cWT	NA	MER105:DNA:DNA	3.89158	5.14965	24.0075	0	0	1.48729	25.5073	41.9877	101.956	320.513	4.89641	110.655	1.44673	34.814	33.5662	144.945	46.167	109.51	0.534559	0.522078	183.107	0	0.707406	17.7496	30.3016	3.18134	59.0887	1.82958	25.6599	0	16.9567	73.6685	8.2004	85.6868	74.1275	0
MER119:hAT-Charlie:DNA	56.93	2.47233	0.783676	3.15478	0.00160618	0.00781954	MER119	hAT-Charlie	DNA	Up	8cWT-2cWT	2cWT-2cKO	MER119:hAT-Charlie:DNA	14.0097	17.8257	5.335	0	38.2283	1.48729	31.0523	19.4271	107.866	114.71	150.157	35.2311	53.5288	45.2582	26.6912	109.242	84.0899	13.6888	166.783	64.7376	29.4109	5.66394	15.5629	36.7094	10.3469	306.999	3.24663	12.807	20.0468	35.0544	60.8104	42.6738	63.2602	53.4283	23.2687	120.293
Charlie10:hAT-Charlie:DNA	30.0772	6.72035	2.22889	3.01511	0.00256886	0.0114759	Charlie10	hAT-Charlie	DNA	Up	8cWT-2cWT	NA	Charlie10:hAT-Charlie:DNA	0	0.396127	0	0	0	0	242.873	0	0	0	1.63214	1.48864	44.8485	0	0	0	0	0	0	0.522078	0.94874	0	0	0	0	177.36	3.89596	0.609858	2.40561	96.8609	2.63122	73.6685	63.2602	8.06464	0.664821	382.75
Charlie4a:hAT-Charlie:DNA	71.5819	2.6324	0.894313	2.94349	0.00324538	0.0139191	Charlie4a	hAT-Charlie	DNA	Up	8cWT-2cWT	NA	Charlie4a:hAT-Charlie:DNA	21.7929	13.0722	76.4683	4.49622	8.49518	0	3.32703	35.7209	68.9556	155.196	246.453	133.977	240.156	175.231	8.89707	27.1772	48.915	97.2626	10.1566	71.0026	14.2311	3.39836	84.8888	57.6861	11.825	248.94	97.399	112.824	21.6505	26.7521	223.654	82.2032	11.7149	171.374	25.2632	0
MER102c:hAT-Charlie:DNA	16.1105	5.42528	1.90308	2.85079	0.00436109	0.0176916	MER102c	hAT-Charlie	DNA	Up	8cWT-2cWT	2cWT-2cKO	MER102c:hAT-Charlie:DNA	0	0	0	0	0	2.97459	171.897	18.1738	0	10.1215	4.89641	0.992425	23.1476	0	26.2868	65.0121	1.09921	0	0.534559	139.395	5.69244	0	27.5888	0.4034	0	50.9014	1.94798	0	0	4.61242	38.2988	0.449198	0	0	1.66205	0
MER5A:hAT-Charlie:DNA	495.785	1.32219	0.493335	2.6801	0.00736005	0.027049	MER5A	hAT-Charlie	DNA	Up	8cWT-2cWT	NA	MER5A:hAT-Charlie:DNA	198.471	462.28	158.272	346.209	382.283	47.5934	159.698	636.082	572.331	968.287	566.352	734.395	1017.05	652.763	486.912	428.441	605.667	386.889	357.62	353.969	631.861	1010.45	528.433	528.05	492.955	1764.05	439.594	365.305	172.402	440.948	387.081	575.872	264.756	649.204	384.931	178.617
MER113:hAT-Charlie:DNA	36.2908	3.53075	1.42361	2.48014	0.0131331	0.0428478	MER113	hAT-Charlie	DNA	Up	8cWT-2cWT	2cWT-2cKO	MER113:hAT-Charlie:DNA	2.33495	0.396127	0	0	8.49518	1.48729	1.10901	18.8005	103.926	0	21.2178	9.42804	7.23363	0.580233	3.63971	0	3.84725	3.60232	4.27648	23.4935	73.053	0	6.36666	4.84079	0.739063	233.033	50.6475	0.609858	0	2.76745	24.558	94.3316	142.921	14.1131	1.32964	455.655
MER45A:hAT-Tip100:DNA	19.5178	5.50092	2.02788	2.71265	0.00667484	0.0249691	MER45A	hAT-Tip100	DNA	Up	8cWT-2cWT	2cWT-2cKO	MER45A:hAT-Tip100:DNA	0	0	0	0	0	1.48729	4.43604	26.9473	15.7613	0	0	54.0872	41.955	0	7.27942	20.7826	190.714	0.720463	0	0	0	70.2328	0	47.6011	0	152.704	0.649327	0	0.801872	1.84497	5.55479	53.0053	0	0	25.5956	0
Looper:PiggyBac:DNA	33.0948	5.11486	1.30429	3.92157	8.79754e-05	0.000680195	Looper	PiggyBac	DNA	Up	8cWT-2cWT	2cWT-2cKO	Looper:PiggyBac:DNA	0	0	0	4.49622	8.49518	2.97459	0	61.4148	18.7165	263.158	128.939	15.8788	1.44673	67.8873	59.853	35.7034	2.74804	7.9251	1.60368	80.4	0.94874	5.66394	10.6111	2.017	0	44.5387	35.0637	85.99	15.2356	12.9148	60.2257	1.34759	0	109.881	14.6261	0
MMAR1:TcMar-Mariner:DNA	73.7311	3.37425	1.16539	2.89538	0.00378703	0.0157678	MMAR1	TcMar-Mariner	DNA	Up	8cWT-2cWT	NA	MMAR1:TcMar-Mariner:DNA	0	9.11092	4.44583	0	0	62.4663	131.972	14.4137	0	617.409	4.89641	223.296	30.3812	55.7024	76.0295	191.839	71.9985	8.64556	18.7096	78.3117	128.08	2.26557	12.7333	16.136	21.4328	192.471	110.386	115.263	109.856	8.30236	66.9499	12.5775	1.17149	4.03232	5.98339	320.781
MARNA:TcMar-Mariner:DNA	37.7909	3.22778	1.30897	2.46588	0.0136676	0.0442857	MARNA	TcMar-Mariner	DNA	Up	8cWT-2cWT	NA	MARNA:TcMar-Mariner:DNA	4.6699	17.8257	6.22416	0	0	0	6.65407	33.8408	125.598	0	213.81	1.48864	0	10.4442	0.404412	13.855	23.0835	7.9251	15.5022	1.04416	352.931	52.1082	50.9333	79.0663	54.6907	39.7667	0.649327	34.1521	4.81123	0	47.0696	46.2674	15.2293	0	2.65928	127.583
Tigger6b:TcMar-Tigger:DNA	33.9952	3.75825	1.31226	2.86395	0.00418398	0.0171292	Tigger6b	TcMar-Tigger	DNA	Up	8cWT-2cWT	2cWT-2cKO	Tigger6b:TcMar-Tigger:DNA	0	15.4489	0	0	0	0	0	58.9081	93.09	134.953	0	35.7273	5.7869	0.580233	3.2353	1.59866	19.7859	86.4556	7.48383	50.1195	45.5395	5.66394	1.41481	39.1298	0.739063	290.297	27.9211	55.4971	121.083	10.1473	37.4218	8.53476	46.8594	20.1616	34.2383	0
Tigger1:TcMar-Tigger:DNA	179.173	2.0986	0.841064	2.49518	0.0125895	0.0414909	Tigger1	TcMar-Tigger	DNA	Up	8cWT-2cWT	NA	Tigger1:TcMar-Tigger:DNA	173.565	20.9947	18.6725	35.9697	123.18	2.97459	185.205	119.07	156.135	462.214	238.292	193.027	516.481	269.228	197.758	57.5517	298.986	460.376	148.073	371.719	97.7202	0	205.148	112.548	30.3016	1024.39	13.6359	32.9324	34.4805	333.939	93.5544	37.7326	72.6321	214.721	168.865	3.64524
MER2:TcMar-Tigger:DNA	777.605	0.863295	0.347851	2.4818	0.0130721	0.0426739	MER2	TcMar-Tigger	DNA	Up	8cWT-2cWT	NA	MER2:TcMar-Tigger:DNA	407.06	438.512	520.162	606.989	552.187	306.382	778.526	849.154	900.363	991.903	1433.02	739.357	724.809	438.076	843.2	825.441	696.902	501.443	957.396	621.795	848.174	739.71	498.014	993.976	395.399	2845.71	566.213	506.182	627.865	861.601	364.278	790.139	653.689	696.584	996.567	619.69
L1MEg:L1:LINE	933.403	2.14398	0.332006	6.45766	1.06332e-10	3.88192e-09	L1MEg	L1	LINE	Up	8cWT-2cWT:8cKO-2cKO	NA	L1MEg:L1:LINE	321.445	558.539	87.1383	629.47	229.37	413.468	865.029	1438.24	1755.9	1514.85	2048.33	2851.24	1004.03	1684.42	404.008	555.267	349.001	603.028	597.637	548.704	1002.82	389.679	599.173	511.511	473.74	896.342	942.823	199.424	546.876	1381.88	1384.9	1478.31	1398.75	1676.44	1337.62	867.566
L1_Mur1:L1:LINE	703.463	2.12135	0.426987	4.9682	6.75781e-07	9.76076e-06	L1_Mur1	L1	LINE	Up	8cWT-2cWT	2cWT-2cKO	L1_Mur1:L1:LINE	235.052	230.546	70.2441	157.368	42.4759	249.865	566.705	414.864	778.705	597.166	594.098	414.834	1966.1	435.175	1050.26	505.709	467.716	1119.6	857.968	716.813	932.612	619.635	900.528	829.389	820.36	3126.46	279.211	358.597	789.042	952.004	661.898	645.947	681.804	553.436	766.871	1017.02
L1_Mus1:L1:LINE	5208.05	1.21047	0.2628	4.60605	4.10398e-06	4.81018e-05	L1_Mus1	L1	LINE	Up	8cWT-2cWT	2cWT-2cKO	L1_Mus1:L1:LINE	1823.6	3028.39	2930.69	3160.84	1754.26	2296.38	5921.01	5469.05	7037.41	4089.07	4729.94	4707.07	7601.09	6708.08	4157.36	4105.36	4573.28	4354.48	5814.94	5057.37	4225.69	5563.12	5016.93	6529.83	4203.79	14118.8	3811.55	2568.11	4149.69	5091.19	5952.69	6720	4287.64	6046.47	7546.05	7928.39
L1_Mus2:L1:LINE	3131.6	1.22829	0.273595	4.48946	7.14033e-06	7.80951e-05	L1_Mus2	L1	LINE	Up	8cWT-2cWT:8cKO-2cKO	2cWT-2cKO	L1_Mus2:L1:LINE	1998.72	1257.7	1500.02	2122.21	828.28	1206.19	2282.34	3268.15	3732.96	3657.22	3556.43	2767.87	5075.11	3506.93	2295.85	2475.26	3177.28	2230.55	2949.16	3195.12	3148.87	1329.89	3131.69	4163.49	2190.58	7251.06	2632.37	2044.25	1556.43	3872.59	4540.9	4232.79	3038.83	3864.98	5359.12	4837.23
MusHAL1:L1:LINE	924.124	1.5313	0.385147	3.97587	7.0122e-05	0.00056295	MusHAL1	L1	LINE	Up	8cWT-2cWT	2cWT-2cKO:8cKO-2cKO	MusHAL1:L1:LINE	179.013	183.803	291.646	305.743	144.418	62.4663	221.802	282.007	571.839	438.597	721.405	496.709	1173.29	581.394	847.244	1487.82	1849.98	1874.65	1311.27	1139.7	1612.86	407.803	1524.46	1432.47	2048.68	4367.97	749.973	1232.52	833.946	492.607	623.599	870.096	632.602	852.836	921.774	721.757
L1Md_A:L1:LINE	5916.65	1.24809	0.327415	3.81196	0.000137871	0.000994783	L1Md_A	L1	LINE	Up	8cWT-2cWT:8cKO-2cKO	8cWT-8cKO	L1Md_A:L1:LINE	2273.46	2284.46	2570.58	3583.48	2115.3	2486.75	3965.82	6096.36	5178.56	9605.27	6007.9	4564.66	7965.67	5108.96	2989.82	2700.13	3613.12	3908.51	4051.43	2868.82	2472.42	2981.5	4130.55	4405.12	1851.35	14757.4	1915.51	2543.72	3031.88	14218.3	11730	12445.5	9108.3	10315.7	13305.1	15022
L1M2a:L1:LINE	32.5335	6.05821	1.77053	3.42169	0.000622334	0.00355663	L1M2a	L1	LINE	Up	8cWT-2cWT	2cWT-2cKO	L1M2a:L1:LINE	0	0	0	8.99243	0	1.48729	383.718	105.283	0	80.9717	0	0.496213	8.68035	0.580233	29.5221	0	14.8394	9.36603	0	0.522078	0	15.859	16.9778	22.5904	205.46	101.007	87.6591	0	0	26.7521	36.2523	6.73797	0	9.07272	30.9142	0
L1MEi:L1:LINE	18.6818	5.18049	1.59553	3.24689	0.00116675	0.00599616	L1MEi	L1	LINE	Up	8cWT-2cWT	NA	L1MEi:L1:LINE	3.11327	0	0	4.49622	0	0	2.21802	0.626682	55.1644	0	13.0571	1.98485	189.521	52.8012	61.4707	43.1638	37.3733	2.88185	13.8985	0.522078	36.0521	0	0.707406	44.7773	7.39063	12.7253	1.29865	0.609858	0	0	11.4019	0	0	0	61.1635	32.8071
L1MEd:L1:LINE	394.47	1.51528	0.486414	3.11521	0.00183813	0.00872533	L1MEd	L1	LINE	Up	8cWT-2cWT	2cWT-2cKO	L1MEd:L1:LINE	165.781	103.389	156.493	188.841	38.2283	72.8774	102.029	742.618	257.598	107.962	132.203	587.516	292.238	540.197	455.368	163.596	213.797	216.139	176.405	292.364	445.908	344.367	250.422	334.015	495.912	1798.25	232.459	364.695	494.755	557.181	334.165	401.134	791.924	599.808	632.577	1009.73
L1_Mm:L1:LINE	1025.71	1.18483	0.382308	3.09915	0.00194077	0.00911377	L1_Mm	L1	LINE	Up	8cWT-2cWT:8cKO-2cKO	NA	L1_Mm:L1:LINE	358.026	394.938	332.548	418.148	981.193	593.43	835.085	1069.75	1418.51	762.484	1049.46	976.547	1775.13	1407.65	1172.39	651.187	706.795	1151.3	764.42	329.431	333.008	679.672	656.473	1054.49	1111.55	2983.3	382.454	683.651	659.138	1454.76	1567.91	1312.56	1279.26	1436.51	1977.18	2664.67
L1M7:L1:LINE	29.6034	4.60327	1.56157	2.94785	0.00319996	0.01376	L1M7	L1	LINE	Up	8cWT-2cWT	NA	L1M7:L1:LINE	0	10.6954	0	0	0	0	205.167	9.40023	137.419	0	50.5963	2.97728	2.89345	1.16047	15.3677	6.39463	2.19843	0	0.534559	4.17662	0	108.748	25.4666	1.2102	122.685	1.59067	0.649327	42.0802	0	24.9071	86.8302	0.898396	52.7168	129.034	49.5292	0
L1Md_Gf:L1:LINE	554.905	1.47581	0.504023	2.92806	0.00341085	0.0144972	L1Md_Gf	L1	LINE	Up	8cWT-2cWT:8cKO-2cKO	NA	L1Md_Gf:L1:LINE	52.1472	133.495	87.1383	642.959	29.7331	298.946	390.372	567.147	350.688	775.979	308.474	372.16	1027.17	779.834	312.206	391.671	179.722	206.773	495.537	538.784	227.698	535.808	895.576	615.991	155.203	1402.17	253.887	227.477	258.203	1885.56	806.615	708.834	928.988	1028.24	816.068	743.628
Lx2A:L1:LINE	135.726	2.52787	0.888347	2.84559	0.00443292	0.0179115	Lx2A	L1	LINE	Up	8cWT-2cWT	NA	Lx2A:L1:LINE	14.788	1.98063	7.11333	152.871	8.49518	0	104.247	137.243	379.748	101.215	13.0571	55.0796	431.124	132.873	47.7207	14.9208	226.438	186.6	6.94927	63.6935	139.465	134.802	111.77	34.289	25.8672	512.99	8.44125	8.53802	287.872	89.481	89.4614	105.561	258.898	54.4363	163.546	200.488
L1MEb:L1:LINE	17.9848	4.31642	1.5342	2.81347	0.004901	0.0194558	L1MEb	L1	LINE	Up	8cWT-2cWT	2cWT-2cKO	L1MEb:L1:LINE	0	0	2.6675	0	0	0	52.1235	0	19.209	3.37382	1.63214	0.496213	2.89345	31.3326	18.1986	47.4269	0.549607	0	0	26.626	9.4874	64.5689	0.707406	9.27819	2.95625	50.106	116.23	10.9775	4.00936	115.311	21.0497	0.449198	0	24.1939	29.5845	0
L1ME3E:L1:LINE	20.0428	4.5396	1.62114	2.80025	0.00510635	0.0200639	L1ME3E	L1	LINE	Up	8cWT-2cWT:8cKO-2cKO	NA	L1ME3E:L1:LINE	0	0	0	13.4887	0	0	1.10901	58.9081	0	13.4953	0	12.9015	98.3773	41.1966	1.61765	5.86175	2.19843	13.6888	1.06912	0	0	1.13279	5.65925	4.034	0.739063	1.59067	0	0	0.801872	0	9.6478	2.24599	140.578	0	23.2687	287.974
L1MEh:L1:LINE	8.55559	5.61018	2.09335	2.68	0.00736216	0.0270507	L1MEh	L1	LINE	Up	8cWT-8cKO:8cWT-2cWT	8cKO-2cKO	L1MEh:L1:LINE	0	0	0.889166	4.49622	0	0	159.698	8.77355	1.47762	0	0	56.072	7.23363	2.32093	0	13.3222	30.2284	0	18.7096	0	1.89748	0	0	0.806799	0	10.3393	0	0	0	0	0.292358	0	0	0	0	0
L1ME4c:L1:LINE	112.15	3.00461	1.12194	2.67805	0.00740521	0.0271727	L1ME4c	L1	LINE	Up	8cWT-2cWT	2cWT-2cKO	L1ME4c:L1:LINE	0	39.6127	2.6675	0	0	19.3348	327.158	57.6547	120.672	0	68.5498	56.072	1.44673	62.085	174.706	200.898	88.4868	17.2911	169.99	362.322	432.626	7.92951	79.2295	150.468	136.727	835.896	1.94798	190.886	6.41497	78.4112	3.80065	24.2567	318.644	2.01616	55.5126	0
L1_Mus3:L1:LINE	5365.25	0.883149	0.33073	2.67031	0.00757823	0.0277153	L1_Mus3	L1	LINE	Up	8cWT-2cWT	2cWT-2cKO	L1_Mus3:L1:LINE	2516.3	2051.54	2469.21	4078.07	2191.76	2806.52	3382.48	4587.94	6425.18	4051.96	4344.75	2945.52	8185.57	5682.23	4573.5	5150.88	6291.9	5525.95	5700.01	5659.32	6388.82	3835.62	5951.41	8067.59	3808.39	22901.6	3383.64	4611.75	3134.52	5756.3	5154.56	6238.91	3583.57	6572.68	7476.25	5770.41
L1ME2:L1:LINE	208.885	1.85992	0.71159	2.61375	0.00895545	0.0316194	L1ME2	L1	LINE	Up	8cWT-2cWT	2cWT-2cKO	L1ME2:L1:LINE	79.3883	26.1444	64.0199	26.9773	0	123.445	262.836	340.288	211.3	40.4859	161.582	198.485	230.029	123.59	393.493	289.357	113.769	289.626	336.772	156.101	176.466	134.802	31.8333	400.172	343.664	1247.08	50.6475	151.855	92.2152	11.0698	155.242	161.262	70.2891	313.513	216.732	696.24
L1MC3:L1:LINE	371.262	1.29532	0.498921	2.59624	0.0094249	0.0329185	L1MC3	L1	LINE	Up	8cWT-2cWT	NA	L1MC3:L1:LINE	257.623	343.838	91.5841	170.856	67.9615	233.505	290.561	287.02	293.554	97.8408	1514.62	340.402	730.596	282.574	169.449	363.428	385.824	161.384	147.538	325.254	95.8228	112.146	270.937	526.84	308.928	883.616	238.952	145.756	542.867	335.784	402.284	496.364	649.003	531.258	782.162	156.745
Lx8:L1:LINE	4203.01	0.880033	0.347019	2.53598	0.0112133	0.0379702	Lx8	L1	LINE	Up	8cWT-2cWT	2cWT-2cKO	Lx8:L1:LINE	1810.36	1952.11	2572.36	3808.3	3138.97	1418.88	3630.9	3770.75	5822.31	5209.18	4181.54	2761.92	7476.67	3190.7	3764.67	3680.11	4512.27	2841.51	4480.68	3541.25	4069.15	3730.27	4453.83	5046.12	3839.43	18520.1	2314.2	3803.08	2475.38	4004.51	3228.8	4468.62	2867.8	5063.59	5728.1	4640.39
L1VL2:L1:LINE	1102.25	1.09661	0.434476	2.52399	0.0116031	0.0389944	L1VL2	L1	LINE	Up	8cWT-2cWT	2cWT-2cKO	L1VL2:L1:LINE	662.347	593.794	257.858	148.375	488.473	699.028	850.612	925.609	1215.1	634.278	1059.26	842.569	1617.44	999.742	1167.54	942.143	1203.64	1283.15	1373.28	470.392	906.047	490.497	923.873	1150.5	1090.86	6318.93	379.856	1159.34	1035.22	1145.73	1276.73	1253.26	677.118	1518.17	1533.74	845.695
L1_Mus4:L1:LINE	1102.54	0.987287	0.392656	2.51438	0.0119242	0.0397958	L1_Mus4	L1	LINE	Up	8cWT-2cWT	2cWT-2cKO	L1_Mus4:L1:LINE	397.72	633.803	1203.04	224.811	412.016	266.226	780.744	1121.13	1022.02	678.138	1212.68	621.258	1853.25	1035.72	630.074	1185.67	1565.28	1089.34	1243.92	1040.5	584.424	1214.35	1074.55	1121.85	798.188	4386.27	937.628	797.085	926.162	1262.88	962.734	1206.55	494.367	1623.01	1929.31	2085.08
Lx6:L1:LINE	1190.19	1.13495	0.452528	2.50801	0.0121413	0.0403279	Lx6	L1	LINE	Up	8cWT-2cWT	2cWT-2cKO	Lx6:L1:LINE	715.273	710.651	377.006	831.8	131.675	627.638	1112.34	1458.29	1218.05	334.008	1410.17	816.27	2041.33	1552.12	1131.95	1284.79	1000.83	1037.47	1582.83	821.75	1070.18	1584.77	1058.28	1262.64	829.968	5475.08	364.922	554.971	427.398	1993.49	1026.47	1366.46	617.373	1108.89	2212.52	1396.13
L1MC1:L1:LINE	441.447	1.31808	0.526491	2.50351	0.0122968	0.0406973	L1MC1	L1	LINE	Up	8cWT-2cWT	NA	L1MC1:L1:LINE	232.717	314.129	347.664	112.405	195.389	66.9282	74.3037	664.283	530.465	465.587	634.902	198.981	1267.33	403.843	792.244	638.398	617.209	518.013	361.362	513.725	280.827	186.91	302.063	394.525	297.103	1493.64	55.1928	361.036	441.029	480.615	555.479	560.15	407.677	1003.04	323.768	113.002
Lx3B:L1:LINE	1172.94	1.00708	0.417428	2.41259	0.0158397	0.0497403	Lx3B	L1	LINE	Up	8cWT-2cWT	NA	Lx3B:L1:LINE	435.857	369.982	377.895	2014.31	726.338	477.421	1263.16	1381.21	1852.93	1491.23	644.695	1633.04	1494.47	1973.95	697.611	1161.16	2089.61	832.856	1617.04	1362.62	1211.54	160.856	1921.32	724.909	504.041	2053.55	565.564	869.658	691.213	1339.45	760.422	1381.28	1097.68	1522.2	1479.56	849.34
L4_A_Mam:RTE-X:LINE	28.745	6.88044	1.41756	4.85372	1.21165e-06	1.62648e-05	L4_A_Mam	RTE-X	LINE	Up	8cWT-2cWT	2cWT-2cKO	L4_A_Mam:RTE-X:LINE	0	0.792254	0.889166	0	0	0	15.5262	1.25336	0.985079	188.934	189.328	18.8561	59.3157	62.6652	91.3972	68.2094	2.19843	2.88185	19.2441	0	5.69244	3.39836	7.78147	3.6306	11.086	111.347	57.1408	0	0.801872	1.84497	1.75415	103.316	7.02891	1.00808	17.2853	0
RLTR6-int:ERV1:LTR	7795.6	-2.57238	0.384108	-6.69703	2.12698e-11	8.92793e-10	RLTR6-int	ERV1	LTR	Down	NA	2cWT-2cKO:8cWT-8cKO:8cWT-2cWT:8cKO-2cKO	RLTR6-int:ERV1:LTR	7250.8	5114.79	6044.55	5723.68	5084.37	3466.88	693.132	334.022	1181.11	867.072	1612.55	500.679	1218.14	923.732	10084.4	21208.3	3898.36	11982	2479.29	16858.9	17313.6	17157.2	27459.4	14308.2	18150.7	11267.5	12298.9	21929.3	14098.5	1317.31	2641.74	3731.49	2259.79	5066.61	6255.63	2682.89
RLTR6B_Mm:ERV1:LTR	1612.03	-2.52433	0.506277	-4.98605	6.16249e-07	9.03504e-06	RLTR6B_Mm	ERV1	LTR	Down	NA	2cWT-2cKO:8cWT-8cKO:8cWT-2cWT:8cKO-2cKO	RLTR6B_Mm:ERV1:LTR	1408.75	996.655	1327.52	723.891	577.672	899.812	7.76308	70.8151	304.39	114.71	47.332	103.708	617.752	110.244	1926.22	5254.79	973.354	3992.09	970.225	2828.1	3479.98	2935.05	5525.55	2740.29	4807.61	2137.06	2862.88	4731.28	2861.08	343.164	412.224	581.262	292.871	582.67	1135.85	473.881
RLTR6_Mm:ERV1:LTR	291.881	-2.24583	0.538289	-4.17217	3.01719e-05	0.00027477	RLTR6_Mm	ERV1	LTR	Down	NA	8cWT-8cKO:8cWT-2cWT	RLTR6_Mm:ERV1:LTR	417.956	179.049	371.671	714.898	233.617	141.293	144.171	69.5617	132.001	47.2335	70.1819	18.8561	57.869	35.9745	300.883	385.277	370.985	692.365	144.331	551.314	151.798	512.02	995.321	394.928	313.363	702.28	232.459	417.143	218.109	42.4343	321.301	172.043	50.3739	111.897	140.277	856.631
MER89:ERV1:LTR	1982.33	-2.2657	0.551497	-4.10828	3.98621e-05	0.000350846	MER89	ERV1	LTR	Down	NA	8cWT-8cKO:8cWT-2cWT:8cKO-2cKO	MER89:ERV1:LTR	924.64	713.028	1529.37	2374	2692.97	684.155	461.349	160.431	725.018	33.7382	830.758	53.591	81.0166	121.849	5264.24	1810.21	4372.12	3507.94	3651.04	5770.53	4573.88	1981.24	2440.55	3047.68	1813.66	244.168	5977.7	4329.99	4045.44	550.723	780.887	773.07	1037.94	1208.69	1978.18	1093.57
LTRIS6:ERV1:LTR	28.0659	-8.7081	2.33382	-3.73126	0.000190524	0.00130364	LTRIS6	ERV1	LTR	Down	NA	8cWT-2cWT:8cKO-2cKO	LTRIS6:ERV1:LTR	7.78316	60.6074	0	508.072	0	0	0	0	0	0	0	0	1.44673	0	14.1544	0	1.64882	12.2479	0.534559	0.522078	282.725	0	113.892	0.4034	0	33.404	0	0	0	0	0	0	0	0	0.997232	0
RLTR30E_MM:ERV1:LTR	92.039	-2.28483	0.882332	-2.58954	0.00961041	0.0334393	RLTR30E_MM	ERV1	LTR	Down	NA	8cWT-2cWT	RLTR30E_MM:ERV1:LTR	187.574	76.8486	108.478	669.936	0	8.92376	2.21802	51.3879	66.0003	3.37382	3.26428	12.9015	69.4428	75.4304	127.39	230.74	108.822	29.539	160.368	136.784	38.8984	30.5853	169.07	131.105	118.989	159.862	137.008	56.7168	2.40561	20.2947	63.734	99.7219	0	159.277	58.5043	21.8714
MER110A:ERV1:LTR	17.4503	17.8021	2.81057	6.334	2.3888e-10	7.99717e-09	MER110A	ERV1	LTR	Up	8cWT-2cWT	2cWT-2cKO	MER110A:ERV1:LTR	0	0	0	0	0	0	0	8.77355	0	0	0	0	1.44673	0	0	110.307	52.7623	0	0	2.08831	0	0	158.459	0	0	152.704	0	0	0	0.922485	0.292358	0.898396	0	102.824	54.1829	0
RLTR1B-int:ERV1:LTR	2415.17	2.1683	0.435017	4.9844	6.21548e-07	9.08054e-06	RLTR1B-int	ERV1	LTR	Up	8cWT-2cWT:8cKO-2cKO	NA	RLTR1B-int:ERV1:LTR	512.132	1012.9	956.742	1537.71	1325.25	679.693	3130.74	2683.45	2812.89	10121.5	5563.96	3449.67	4492.08	3808.65	441.214	471.604	461.12	295.39	1750.68	1021.18	373.804	636.626	1285.36	981.471	176.636	1917.55	246.744	679.992	368.861	5610.55	4945.81	4258.4	3800.3	2992.99	3811.42	2635.51
RLTR1B:ERV1:LTR	477.829	2.60993	0.590431	4.42038	9.85297e-06	0.000103657	RLTR1B	ERV1	LTR	Up	8cWT-2cWT	2cWT-2cKO	RLTR1B:ERV1:LTR	21.7929	160.035	224.07	4.49622	135.923	20.8221	689.805	382.903	703.347	458.84	550.031	638.626	564.223	664.367	125.368	185.977	467.166	243.517	677.821	357.623	96.7715	354.562	398.27	636.161	252.021	2639.71	160.384	233.576	432.209	610.685	837.897	660.321	254.212	419.361	570.749	809.243
RLTR24B_MM:ERV1:LTR	35.1228	5.30415	1.6483	3.21795	0.00129109	0.00652371	RLTR24B_MM	ERV1	LTR	Up	8cWT-2cWT	2cWT-2cKO	RLTR24B_MM:ERV1:LTR	0	0	0	0	0	1.48729	5.54506	0	51.2241	0	0	0.496213	54.9756	10.4442	3.63971	82.5974	48.3654	64.1213	7.48383	0.522078	0	66.8344	53.0555	14.5224	110.86	489.926	44.1542	1.82958	0	1.84497	1.46179	101.519	2.34297	78.6303	1.66205	0
RLTR4_Mm:ERV1:LTR	630.499	1.25484	0.424802	2.95395	0.00313738	0.0135614	RLTR4_Mm	ERV1	LTR	Up	8cWT-2cWT	2cWT-2cKO	RLTR4_Mm:ERV1:LTR	313.662	260.255	152.047	67.4433	76.4566	345.052	365.974	127.843	450.181	914.306	851.976	516.557	415.21	277.352	607.832	597.365	668.872	828.533	985.193	1130.3	750.454	539.207	1080.92	804.379	487.782	1307.53	525.305	846.484	1190.78	108.853	827.957	730.845	574.028	834.691	469.364	1818.97
IAP1-MM_I-int:ERVK:LTR	247.108	-3.57605	0.764529	-4.67745	2.90462e-06	3.55037e-05	IAP1-MM_I-int	ERVK	LTR	Down	NA	8cWT-2cWT:8cKO-2cKO	IAP1-MM_I-int:ERVK:LTR	109.743	25.3521	36.4558	1560.19	182.646	5.94917	23.2892	87.1088	21.1792	60.7288	11.425	6.94698	2.89345	1.7407	368.824	135.353	512.783	469.022	1060.03	515.291	90.1303	190.308	691.136	290.448	307.45	816.808	112.334	439.708	180.421	147.598	63.4416	44.9198	63.2602	136.091	127.978	76.55
IAP1-MM_LTR:ERVK:LTR	472.742	-2.96847	0.693935	-4.27774	1.88799e-05	0.000182061	IAP1-MM_LTR	ERVK	LTR	Down	NA	8cWT-8cKO:8cWT-2cWT	IAP1-MM_LTR:ERVK:LTR	192.244	1.98063	126.262	256.284	1193.57	215.658	38.8154	33.8408	9.85079	77.5979	17.9535	0.992425	78.1232	82.3932	534.633	962.393	1053.6	482.711	632.918	856.208	380.445	1282.32	972.684	1156.95	1225.37	468.452	355.182	1140.44	161.978	339.474	197.926	257.39	420.563	284.279	103.047	309.845
RLTR19:ERVK:LTR	367.212	-1.95495	0.525798	-3.71806	0.000200758	0.00136016	RLTR19	ERVK	LTR	Down	NA	8cWT-8cKO:8cWT-2cWT	RLTR19:ERVK:LTR	266.963	74.0757	500.6	804.823	157.161	159.14	46.5785	101.522	116.732	60.7288	16.3214	38.7046	98.3773	189.736	319.89	666.108	335.81	653.46	152.349	521.034	137.567	903.964	360.777	200.086	325.927	204.401	287.652	270.167	408.954	428.955	250.843	397.091	358.474	580.654	245.984	823.824
MMERVK10D3_LTR:ERVK:LTR	10.0608	-4.69043	1.29158	-3.63154	0.000281733	0.00180383	MMERVK10D3_LTR	ERVK	LTR	Down	NA	8cWT-2cWT:8cKO-2cKO	MMERVK10D3_LTR:ERVK:LTR	25.6844	10.6954	0	4.49622	16.9904	4.46188	0	0.626682	0	0	0	0	2.89345	0	2.42647	17.5852	37.3733	12.2479	29.9353	27.6701	0	57.7721	42.4444	18.153	2.21719	11.93	19.4798	0.609858	3.20749	0	0	5.39037	3.51446	14.1131	0.332411	0
IAPEY5_LTR:ERVK:LTR	14.9362	-5.34483	1.58336	-3.37563	0.000736476	0.00410649	IAPEY5_LTR	ERVK	LTR	Down	NA	8cWT-2cWT:8cKO-2cKO	IAPEY5_LTR:ERVK:LTR	6.22653	0.396127	80.0249	4.49622	0	0	0	1.25336	0	0	0	0	0	0.580233	10.5147	0	28.03	1.44093	9.62207	45.4208	88.2328	46.4443	0	14.9258	2.95625	125.663	2.59731	0	76.1778	0	5.84715	0.449198	0	1.00808	0.332411	0
RLTR20B4_MM:ERVK:LTR	148.19	-1.30595	0.437328	-2.9862	0.00282467	0.0124056	RLTR20B4_MM	ERVK	LTR	Down	NA	8cWT-2cWT:8cKO-2cKO	RLTR20B4_MM:ERVK:LTR	124.531	71.3028	112.035	490.088	361.045	145.755	77.6308	70.1884	128.06	77.5979	71.8141	48.1326	89.697	127.071	331.618	66.6108	257.766	100.865	217.031	157.667	84.4379	116.677	171.192	216.626	104.947	524.125	101.295	174.42	104.243	108.853	75.1359	50.7594	71.4606	140.123	90.0833	182.262
RLTR45-int:ERVK:LTR	49741.7	4.0413	0.336677	12.0035	3.40623e-33	6.25914e-30	RLTR45-int	ERVK	LTR	Up	2cWT-2cKO:8cWT-2cWT:8cKO-2cKO	NA	RLTR45-int:ERVK:LTR	6716.87	6915.58	5883.61	4774.98	1720.27	4212.01	85087.8	61686.2	42154.5	108694	98628.5	111615	68538.6	87408.7	1139.63	962.393	1036.01	1357.35	1234.83	486.577	2646.99	1587.03	992.491	1349.37	2961.43	2677.09	1416.83	2901.71	2165.86	120108	211620	194428	98084.9	130370	159306	120996
ETnERV3-int:ERVK:LTR	1469.65	5.00889	0.575031	8.71065	3.02125e-18	4.34482e-16	ETnERV3-int	ERVK	LTR	Up	8cWT-2cWT:8cKO-2cKO	2cWT-2cKO:8cWT-8cKO	ETnERV3-int:ERVK:LTR	123.752	30.1056	22.2291	49.4584	33.9807	35.695	916.043	707.524	376.793	4224.02	4095.03	679.811	545.415	1225.45	262.059	216.885	292.391	227.666	220.238	125.299	256.16	108.748	122.381	261.403	461.915	1041.89	73.3739	74.4027	416.973	3665.95	3926.95	3951.14	2697.93	5759.16	8327.22	965.988
RLTR45:ERVK:LTR	3512.2	2.93296	0.41914	6.99756	2.60455e-12	1.3588e-10	RLTR45	ERVK	LTR	Up	8cWT-2cWT:8cKO-2cKO	NA	RLTR45:ERVK:LTR	574.398	649.252	950.518	1393.83	135.923	429.828	3612.05	3024.37	2313.46	8326.59	5160.82	4796.89	7590.97	7244.22	623.604	340.514	406.16	635.449	181.216	605.088	282.725	788.42	481.036	490.13	253.499	1828.47	476.606	681.822	356.031	6282.12	10189	18315.1	9252.39	6866.04	6930.43	8398.63
RLTR13B1:ERVK:LTR	2397.46	3.16053	0.491982	6.42408	1.3267e-10	4.73887e-09	RLTR13B1	ERVK	LTR	Up	2cWT-2cKO:8cWT-2cWT:8cKO-2cKO	NA	RLTR13B1:ERVK:LTR	780.651	291.945	433.024	827.304	42.4759	184.424	5097.02	2961.07	1902.68	3842.78	3166.35	5096.6	4487.74	3962.41	93.0148	156.136	35.7245	149.856	178.543	142.005	91.0791	139.333	88.4258	94.7989	204.721	611.612	29.2197	84.7703	69.7628	5318.12	9396.96	10610.5	4364.95	5811.58	7866.16	4972.1
ERVB4_2-LTR_MM:ERVK:LTR	1364.92	3.11025	0.50747	6.12894	8.84653e-10	2.58487e-08	ERVB4_2-LTR_MM	ERVK	LTR	Up	8cWT-2cWT:8cKO-2cKO	NA	ERVB4_2-LTR_MM:ERVK:LTR	521.472	178.257	232.072	319.231	12.7428	139.806	2184.75	1509.68	1133.33	2753.04	2684.87	2531.68	1673.86	1748.82	306.949	533.419	418.251	110.231	1400.55	971.065	296.007	274.135	742.777	557.902	416.832	234.624	81.8152	301.88	230.939	2232.41	3440.17	3991.12	2642.87	3323.64	4099.62	776.436
RLTR31D_MM:ERVK:LTR	1887.51	1.6045	0.363031	4.41974	9.88191e-06	0.000103895	RLTR31D_MM	ERVK	LTR	Up	8cWT-2cWT:8cKO-2cKO	NA	RLTR31D_MM:ERVK:LTR	600.86	784.727	642.867	1829.96	836.775	1624.12	5355.41	2048.62	2084.43	3542.51	4344.75	2550.04	3761.49	1894.46	710.957	715.133	1036.56	524.497	1152.51	874.48	793.147	828.067	394.025	1567.21	1130.77	3231.44	575.304	1099.57	1357.57	4449.14	2412.54	2122.91	2118.04	2510.12	1901.06	2675.6
ERVB4_1C-LTR_Mm:ERVK:LTR	77.5903	4.67314	1.07406	4.3509	1.35578e-05	0.000137389	ERVB4_1C-LTR_Mm	ERVK	LTR	Up	8cWT-2cWT	2cWT-2cKO	ERVB4_1C-LTR_Mm:ERVK:LTR	1.55663	6.73415	1.77833	0	0	0	2.21802	10.6536	44.3286	232.794	6.52855	11.9091	72.3363	65.5664	78.0516	115.636	151.142	99.424	107.981	236.501	40.7958	0	119.552	37.9196	0	585.366	161.033	45.7394	123.488	50.7367	75.1359	64.2353	8.2004	16.1293	23.9336	18.2262
RLTR10C:ERVK:LTR	1219.53	1.78173	0.413751	4.30629	1.66017e-05	0.00016297	RLTR10C	ERVK	LTR	Up	8cWT-2cWT:8cKO-2cKO	8cWT-8cKO	RLTR10C:ERVK:LTR	396.941	266.989	264.082	548.538	407.769	176.988	703.113	951.93	900.363	3846.16	520.652	613.319	1205.12	688.157	386.214	527.557	269.308	312.681	921.581	893.275	495.242	370.421	615.444	789.856	413.136	1284.46	214.927	678.163	335.182	2706.57	3369.13	2410.84	2068.84	2397.22	3667.82	2092.37
MMERVK10C-int:ERVK:LTR	12106.6	1.43242	0.350184	4.09049	4.30456e-05	0.00037527	MMERVK10C-int	ERVK	LTR	Up	8cWT-2cWT:8cKO-2cKO	8cWT-8cKO	MMERVK10C-int:ERVK:LTR	3540.56	1926.76	3133.42	6919.68	3784.6	3200.66	10298.3	7366.65	5942.98	27739.6	8878.83	7143.97	7240.86	6344.27	5144.12	4649.43	5705.47	6267.31	8498.96	5558.04	6568.13	4848.33	5841.05	5926.75	4323.52	16522.3	3266.76	6857.86	3743.14	17616.7	34330.4	26724.1	20858.3	38223.4	37321.1	22421.9
ETnERV-int:ERVK:LTR	711.003	2.12553	0.525693	4.0433	5.27046e-05	0.000444481	ETnERV-int	ERVK	LTR	Up	8cWT-2cWT	2cWT-2cKO	ETnERV-int:ERVK:LTR	91.8413	240.449	42.68	274.269	182.646	105.598	251.746	434.917	408.315	914.306	855.24	503.16	979.433	1074.59	298.052	710.87	934.332	792.51	842.466	777.374	424.087	787.287	1216.74	1330.82	430.874	5474.28	438.945	494.595	350.418	501.832	830.003	313.989	222.582	1079.65	749.253	404.621
RLTR26:ERVK:LTR	52.2158	4.85653	1.20359	4.03503	5.45942e-05	0.000458547	RLTR26	ERVK	LTR	Up	8cWT-2cWT	2cWT-2cKO	RLTR26:ERVK:LTR	9.3398	0.396127	0	4.49622	0	0	5.54506	47.6278	77.3287	97.8408	83.2391	12.4053	208.328	29.0117	45.6986	17.5852	55.5103	5.04324	0.534559	42.8104	0	5.66394	166.24	16.9428	1.47813	48.5154	147.397	2.43943	4.81123	270.288	22.2192	107.358	7.02891	2.01616	131.635	0
IAPLTR1_Mm:ERVK:LTR	671.531	1.91438	0.482279	3.96945	7.20398e-05	0.000577506	IAPLTR1_Mm	ERVK	LTR	Up	8cWT-2cWT	2cWT-2cKO	IAPLTR1_Mm:ERVK:LTR	183.683	118.442	68.4658	80.9319	59.4663	361.412	533.434	716.298	412.256	1339.41	88.1355	398.459	448.485	488.557	556.067	432.704	1408.64	344.382	848.346	1019.1	601.501	445.185	672.036	1156.95	227.632	2095.71	437.646	611.688	681.591	1096.83	1514.7	1383.08	955.932	716.745	758.893	204.133
MMERVK9C_I-int:ERVK:LTR	981.161	1.87809	0.479653	3.91552	9.02096e-05	0.000694547	MMERVK9C_I-int	ERVK	LTR	Up	8cWT-2cWT:8cKO-2cKO	NA	MMERVK9C_I-int:ERVK:LTR	315.996	395.335	374.339	274.269	131.675	193.348	1197.73	877.982	570.361	2317.82	765.473	1025.18	645.239	895.3	428.273	302.679	618.858	496.399	648.421	1306.24	94.874	427.061	500.136	629.303	194.374	2696.98	214.927	275.656	358.437	2041.46	1681.35	2286.42	1857.98	3007.1	1647.43	1370.61
ERVB4_2-I_MM-int:ERVK:LTR	2422.41	2.1382	0.546614	3.91172	9.16418e-05	0.000704917	ERVB4_2-I_MM-int	ERVK	LTR	Up	8cWT-2cWT:8cKO-2cKO	NA	ERVB4_2-I_MM-int:ERVK:LTR	549.491	300.264	448.14	2252.6	80.7042	240.942	1811.02	1574.23	1354.98	2375.17	4995.98	4372.13	3456.23	2717.81	202.206	131.623	116.517	262.969	279.575	87.7091	282.725	252.612	72.1554	212.995	441.96	1427.62	382.454	650.719	181.223	6495.22	8163.21	10082.7	5468.49	5064.6	8156.02	8343.95
RMER13A:ERVK:LTR	170.179	2.79349	0.725911	3.84826	0.00011896	0.00087562	RMER13A	ERVK	LTR	Up	8cWT-2cWT	2cWT-2cKO:8cKO-2cKO	RMER13A:ERVK:LTR	72.3834	41.1972	2.6675	0	8.49518	58.0044	349.339	146.017	182.24	566.802	208.914	15.8788	241.603	40.0361	247.5	138.018	152.791	335.736	316.459	42.2883	106.259	271.869	150.678	341.276	189.939	1108.7	101.944	233.576	145.941	37.8219	42.0995	204.834	42.1735	56.4525	85.7619	10.9357
MLTR31F_MM:ERVK:LTR	42.8814	4.39396	1.16179	3.78205	0.000155543	0.00109837	MLTR31F_MM	ERVK	LTR	Up	8cWT-2cWT	2cWT-2cKO	MLTR31F_MM:ERVK:LTR	3.89158	1.18838	5.335	4.49622	0	0	2.21802	27.574	70.9257	151.822	0	1.98485	172.16	3.4814	31.1398	5.32886	2.19843	0.720463	327.685	8.87532	104.361	9.0623	8.48888	114.969	123.424	49.3107	0.649327	7.3183	34.4805	83.0236	65.4881	69.6257	12.8863	39.3151	19.9446	7.29047
ERVB4_1B-I_MM-int:ERVK:LTR	369.488	1.76008	0.471229	3.73508	0.000187657	0.00128668	ERVB4_1B-I_MM-int	ERVK	LTR	Up	8cWT-2cWT	2cWT-2cKO	ERVB4_1B-I_MM-int:ERVK:LTR	115.969	98.6356	213.4	0	21.238	252.84	174.115	255.686	516.182	840.081	207.282	537.398	312.493	396.88	417.354	245.128	235.232	521.616	209.547	327.865	188.799	559.597	265.985	665.609	259.411	666.49	345.442	313.467	529.235	472.312	566.004	387.209	442.821	727.834	592.356	127.583
ERVB2_1A-I_MM-int:ERVK:LTR	93.0135	3.57074	0.957184	3.73047	0.000191124	0.0013072	ERVB2_1A-I_MM-int	ERVK	LTR	Up	8cWT-2cWT:8cKO-2cKO	2cWT-2cKO:8cWT-8cKO	ERVB2_1A-I_MM-int:ERVK:LTR	17.9013	1.98063	1.77833	4.49622	0	0	4.43604	70.1884	91.6124	43.8597	78.3426	48.6288	10.1271	97.4792	20.2206	162.53	112.12	10.0865	1.60368	28.7143	0.94874	37.382	0.707406	62.9303	77.6017	87.4867	3.89596	54.8873	0	83.0236	250.55	379.572	234.297	390.127	282.549	513.978
RMER16C:ERVK:LTR	13.2038	6.02691	1.62125	3.71744	0.000201252	0.00136127	RMER16C	ERVK	LTR	Up	8cWT-2cWT	NA	RMER16C:ERVK:LTR	0	0	0.889166	0	0	1.48729	66.5407	1.25336	24.627	195.682	0	7.44319	11.5738	0	0.404412	1.06577	11.5418	0	1.06912	0.522078	0	35.1164	24.0518	1.6136	0.739063	323.701	1.29865	0	0	0.922485	6.72423	0.898396	1.17149	28.2263	60.4987	0
RMER6BA:ERVK:LTR	119.598	2.50021	0.691296	3.6167	0.000298378	0.001895	RMER6BA	ERVK	LTR	Up	8cWT-2cWT	2cWT-2cKO:8cKO-2cKO	RMER6BA:ERVK:LTR	10.1181	47.5352	72.9116	0	4.24759	1.48729	53.2325	113.429	171.896	43.8597	257.878	193.027	117.185	137.515	194.522	79.4	80.2426	134.006	119.207	72.0467	127.131	112.146	195.244	239.216	279.366	676.829	77.2699	151.855	131.507	88.5585	84.4914	26.0535	17.5723	125.002	181.829	7.29047
MLTR18A_MM:ERVK:LTR	11.4655	4.87679	1.42792	3.4153	0.000637114	0.0036308	MLTR18A_MM	ERVK	LTR	Up	8cWT-2cWT	2cWT-2cKO:8cKO-2cKO	MLTR18A_MM:ERVK:LTR	0.778316	0.396127	0.889166	0	0	0	0	31.3341	3.44778	3.37382	0	43.6667	27.4878	34.814	10.5147	0	42.3198	0.720463	7.48383	10.4416	0.94874	121.208	0.707406	20.5734	32.5188	5.56734	0	3.65915	9.62246	0.922485	1.16943	1.34759	0	0	8.31026	0
RMER6D:ERVK:LTR	614.675	1.83942	0.540769	3.40148	0.000670214	0.00378547	RMER6D	ERVK	LTR	Up	8cWT-2cWT:8cKO-2cKO	NA	RMER6D:ERVK:LTR	302.765	99.4278	106.7	332.72	373.788	72.8774	364.865	559	434.913	1470.99	772.001	724.967	1077.81	706.144	211.912	246.193	117.066	711.097	68.4236	536.696	505.679	449.717	233.444	389.684	208.416	2188.76	207.135	182.958	550.886	1356.98	1206.27	692.214	357.303	2236.93	1046.43	754.564
RLTR8:ERVK:LTR	43.6438	4.33519	1.28811	3.36553	0.000763961	0.00423973	RLTR8	ERVK	LTR	Up	8cWT-2cWT	2cWT-2cKO	RLTR8:ERVK:LTR	5.44822	0	8.00249	0	8.49518	2.97459	62.1046	18.8005	9.35825	438.597	0	2.97728	118.631	21.4686	2.83089	16.5195	81.8915	124.64	8.55295	70.4805	0	0	30.4185	37.9196	2.95625	202.81	2.59731	94.5281	16.0374	20.2947	15.7873	53.9037	121.834	0	13.9612	0
IAPEY4_I-int:ERVK:LTR	487.345	2.09905	0.656019	3.19968	0.0013758	0.00688744	IAPEY4_I-int	ERVK	LTR	Up	8cWT-2cWT:8cKO-2cKO	2cWT-2cKO	IAPEY4_I-int:ERVK:LTR	181.348	202.025	22.2291	8.99243	25.4855	13.3856	94.2659	163.564	277.792	1390.01	22.8499	330.478	160.586	214.106	279.449	421.513	126.41	254.324	406.265	374.852	323.52	480.302	218.589	191.211	677.721	1451.48	125.969	808.062	232.543	1526.71	690.549	1105.93	320.987	987.919	1947.59	776.436
RLTR13C1:ERVK:LTR	24.299	6.16181	1.98448	3.105	0.00190279	0.00898453	RLTR13C1	ERVK	LTR	Up	8cWT-2cWT	2cWT-2cKO	RLTR13C1:ERVK:LTR	0	0	0	0	0	0	4.43604	52.0146	89.1497	0	0	0	0	7.54304	19.8162	24.5128	1.09921	1.44093	0.534559	0.522078	152.747	0	0	24.204	0	213.15	17.5318	0	0	1.84497	41.2224	60.6417	144.093	1.00808	41.5513	0
IAPLTR2_Mm:ERVK:LTR	821.922	1.55566	0.507383	3.06604	0.00216917	0.00999548	IAPLTR2_Mm	ERVK	LTR	Up	8cWT-2cWT	NA	IAPLTR2_Mm:ERVK:LTR	241.278	418.31	336.994	368.69	123.18	578.557	204.058	706.271	829.437	3211.88	807.908	595.455	473.079	1299.72	205.441	1044.99	957.416	585.016	1772.06	331.519	229.595	950.408	1070.31	1037.54	719.109	1658.27	393.492	760.493	531.641	1172.48	2175.14	875.487	167.522	853.844	447.425	1144.6
RLTR40:ERVK:LTR	1149.48	1.40286	0.476799	2.94225	0.00325836	0.0139639	RLTR40	ERVK	LTR	Up	8cWT-2cWT:8cKO-2cKO	NA	RLTR40:ERVK:LTR	335.454	1005.37	519.273	1767.01	280.341	147.242	3312.62	1759.1	1053.54	2358.3	2340.49	1560.09	1229.72	655.664	1034.49	310.14	948.622	365.995	1272.79	837.935	287.468	538.074	202.318	733.784	436.786	1750.53	333.105	398.847	213.298	3190.87	1924.3	1569.05	1313.23	1657.28	1312.36	1461.74
IAPA_MM-int:ERVK:LTR	382.13	2.3689	0.806431	2.93751	0.00330857	0.0141534	IAPA_MM-int	ERVK	LTR	Up	8cWT-2cWT	NA	IAPA_MM-int:ERVK:LTR	33.4676	7.52641	129.818	395.667	8.49518	86.263	352.666	585.321	31.5225	2908.23	14.6892	161.765	201.095	265.747	234.964	384.211	392.969	232.71	596.568	528.865	190.697	138.2	780.269	503.846	11.825	750	156.488	167.101	306.315	825.624	547.878	449.647	330.359	553.436	429.142	437.428
RLTR12BD_Mm:ERVK:LTR	94.9631	2.13157	0.741613	2.87423	0.00405016	0.0166787	RLTR12BD_Mm	ERVK	LTR	Up	8cWT-2cWT	2cWT-2cKO	RLTR12BD_Mm:ERVK:LTR	23.3495	0.396127	2.6675	49.4584	29.7331	52.0553	158.589	69.5617	63.5376	357.625	16.3214	157.796	52.0821	21.4686	162.574	71.9396	195.111	54.7552	96.7553	27.6701	56.9244	178.98	61.5444	175.479	22.911	498.674	112.983	45.1295	34.4805	13.8373	30.6975	197.198	151.122	105.848	32.9086	43.7428
RMER16_Mm:ERVK:LTR	148.606	2.54	0.898533	2.82683	0.00470119	0.018807	RMER16_Mm	ERVK	LTR	Up	8cWT-2cWT	2cWT-2cKO	RMER16_Mm:ERVK:LTR	90.2847	44.7623	0	8.99243	8.49518	1.48729	39.9244	93.3756	185.687	64.1026	101.193	120.58	4.34018	614.467	100.294	31.4403	40.6709	146.254	140.055	158.19	68.3093	97.4197	14.1481	55.2657	25.1282	744.433	180.513	96.3576	44.1029	368.994	360.769	144.193	161.665	31.2505	190.471	3.64524
MMETn-int:ERVK:LTR	1679.29	1.3266	0.474326	2.79681	0.00516105	0.0202599	MMETn-int	ERVK	LTR	Up	8cWT-2cWT:8cKO-2cKO	NA	MMETn-int:ERVK:LTR	439.749	1261.27	871.383	2468.42	38.2283	1390.62	4868.56	2088.73	1763.29	5796.22	843.815	1214.73	2324.89	2728.84	727.538	1039.66	1190.45	804.758	904.475	834.802	839.635	777.092	1229.47	690.217	307.45	2718.45	1287.62	922.106	671.166	2777.6	2740.27	1348.94	2330.08	3214.77	1610.53	2722.99
RMER13B:ERVK:LTR	191.752	2.04333	0.742731	2.7511	0.0059395	0.0226749	RMER13B	ERVK	LTR	Up	8cWT-2cWT	2cWT-2cKO	RMER13B:ERVK:LTR	7.78316	5.14965	194.727	26.9773	38.2283	10.4111	43.2514	97.1357	289.613	259.784	9.79283	135.962	478.866	255.303	262.868	69.2752	283.048	537.466	251.778	177.506	19.9235	482.567	307.014	163.377	178.114	745.228	130.515	104.896	48.1123	20.2947	68.4117	254.246	64.4317	212.705	201.108	116.648
RLTR13D1:ERVK:LTR	25.9791	4.15555	1.53127	2.71379	0.0066519	0.0249059	RLTR13D1	ERVK	LTR	Up	8cWT-2cWT	2cWT-2cKO	RLTR13D1:ERVK:LTR	5.44822	0	0.889166	0	0	0	1.10901	70.1884	1.47762	40.4859	0	3.9697	11.5738	63.2455	99.081	2.66443	1.09921	0	0	114.335	29.4109	73.6312	2.82963	9.68159	0	234.624	0	47.569	19.2449	0	12.5714	11.2299	1.17149	63.5091	29.2521	10.9357
RLTR42:ERVK:LTR	11.7879	5.26665	1.94629	2.706	0.00680996	0.0254171	RLTR42	ERVK	LTR	Up	8cWT-2cWT	2cWT-2cKO	RLTR42:ERVK:LTR	0	0	0	0	0	0	1.10901	20.6805	0	3.37382	0	51.1099	5.7869	0	5.25736	28.243	48.915	52.5938	6.94927	5.74286	0	0	2.12222	79.8731	41.3875	62.0361	0	0	0	0	0	1.34759	0	1.00808	18.615	0
RLTR9A:ERVK:LTR	76.6903	2.13739	0.789955	2.70571	0.00681583	0.0254275	RLTR9A	ERVK	LTR	Up	8cWT-2cWT	2cWT-2cKO	RLTR9A:ERVK:LTR	0	23.3715	23.1183	8.99243	4.24759	31.2332	46.5785	90.2422	109.836	6.74764	13.0571	58.5531	88.2502	133.454	33.9706	52.7557	34.6253	94.3807	55.5942	50.6415	4.7437	173.316	34.6629	198.069	115.294	199.629	0	82.3309	16.0374	115.311	61.6875	103.316	35.1446	245.972	52.8533	160.39
RMER6B:ERVK:LTR	432.33	1.25316	0.471283	2.65904	0.00783639	0.0284519	RMER6B	ERVK	LTR	Up	8cWT-2cWT	2cWT-2cKO:8cKO-2cKO	RMER6B:ERVK:LTR	182.126	300.66	118.259	17.9849	267.598	227.556	316.068	413.61	490.57	576.923	179.535	400.444	808.719	373.67	402.795	588.306	261.063	646.256	744.107	1034.24	462.037	417.998	504.381	419.536	373.227	1949.36	378.558	340.911	314.334	343.164	411.64	254.246	283.499	646.18	361.663	153.1
RLTR17C_Mm:ERVK:LTR	28.3462	3.1689	1.19239	2.6576	0.00786996	0.0285362	RLTR17C_Mm	ERVK	LTR	Up	8cWT-2cWT	2cWT-2cKO	RLTR17C_Mm:ERVK:LTR	0	0.792254	4.44583	4.49622	0	1.48729	8.87209	41.361	2.4627	0	4.89641	36.7197	2.89345	27.271	9.30148	65.0121	38.4725	5.76371	6.41471	1.04416	0.94874	6.79672	41.0296	31.0618	22.911	272.8	24.6744	132.339	4.00936	74.7213	92.0926	4.49198	63.2602	1.00808	14.9585	0
RLTR20C2_MM:ERVK:LTR	225.936	1.69392	0.642643	2.63587	0.00839227	0.0299571	RLTR20C2_MM	ERVK	LTR	Up	8cWT-2cWT	NA	RLTR20C2_MM:ERVK:LTR	15.5663	239.657	47.1258	125.894	12.7428	44.6188	263.945	342.168	387.629	16.8691	192.592	187.568	277.771	434.595	215.147	174.787	92.334	39.6255	105.843	193.691	28.4622	343.235	81.3517	259.789	236.5	933.722	419.465	82.9407	134.714	343.164	198.218	360.257	360.817	96.7757	356.012	634.271
RLTR25A:ERVK:LTR	416.517	1.01378	0.385476	2.62994	0.00854011	0.030393	RLTR25A	ERVK	LTR	Up	8cWT-2cWT	2cWT-2cKO:8cKO-2cKO	RLTR25A:ERVK:LTR	25.6844	303.829	421.465	58.4508	131.675	240.942	247.309	300.181	525.54	465.587	370.495	272.421	587.37	454.323	470.736	430.039	511.135	730.55	484.311	495.974	661.272	406.671	352.288	670.853	565.383	1313.1	369.467	817.21	598.998	221.396	250.843	334.203	318.644	444.563	158.56	160.39
RLTR13C2:ERVK:LTR	176.483	1.65278	0.628623	2.6292	0.00855853	0.0304487	RLTR13C2	ERVK	LTR	Up	8cWT-2cWT:8cKO-2cKO	NA	RLTR13C2:ERVK:LTR	1.55663	30.1056	56.0174	13.4887	191.142	194.835	102.029	315.221	423.584	485.83	22.8499	206.424	283.558	186.835	12.5368	47.9598	36.8237	29.539	7.48383	53.774	37.9496	27.1869	73.5703	44.7773	114.555	62.0361	43.5049	47.569	176.412	176.195	325.686	619.444	333.873	354.844	362.66	645.207
RLTR20B3:ERVK:LTR	80.3449	2.21795	0.845229	2.62409	0.00868816	0.0308535	RLTR20B3	ERVK	LTR	Up	8cWT-2cWT	NA	RLTR20B3:ERVK:LTR	61.487	32.4824	24.8966	0	0	5.94917	11.0901	125.336	324.584	6.74764	13.0571	107.678	115.738	103.862	120.919	12.2564	95.082	97.2626	184.958	95.5402	4.7437	107.615	1.41481	108.514	21.4328	360.286	33.765	28.0535	61.7441	105.163	179.8	75.016	9.37188	63.5091	125.984	43.7428
RMER17B2:ERVK:LTR	88.5493	2.13269	0.815334	2.61572	0.00890394	0.0314509	RMER17B2	ERVK	LTR	Up	8cWT-2cWT	2cWT-2cKO	RMER17B2:ERVK:LTR	27.2411	15.0528	9.78082	8.99243	16.9904	17.8475	22.1802	61.4148	213.762	40.4859	31.0106	52.5985	49.1887	93.9978	279.449	12.2564	192.912	94.3807	39.0228	30.8026	0.94874	175.582	4.24444	196.859	87.9485	560.711	25.3237	43.9098	76.9797	265.676	98.2322	121.733	2.34297	102.824	34.5707	25.5167
RLTR12B:ERVK:LTR	86.7417	1.85192	0.730956	2.53355	0.0112913	0.0381793	RLTR12B	ERVK	LTR	Up	8cWT-2cWT	NA	RLTR12B:ERVK:LTR	31.1327	28.5211	5.335	0	21.238	104.111	243.982	130.977	130.03	145.074	96.2962	55.5758	75.2297	55.7024	109.596	78.3343	44.5182	329.972	60.4052	39.1558	5.69244	215.23	164.118	67.7711	23.65	303.818	111.035	6.09858	43.3011	127.303	109.342	48.0642	97.2333	22.1778	64.1552	7.29047
RLTR20A4:ERVK:LTR	360.419	1.32358	0.523851	2.52664	0.011516	0.0387648	RLTR20A4	ERVK	LTR	Up	8cWT-2cWT	2cWT-2cKO	RLTR20A4:ERVK:LTR	177.456	263.82	330.77	67.4433	110.437	78.8265	480.202	315.848	224.598	846.829	324.796	177.148	779.785	319.709	368.015	727.39	449.029	233.43	402.523	764.844	209.672	143.864	444.251	276.329	470.044	1364	329.858	184.787	156.365	885.585	225.7	293.775	149.95	139.115	289.197	306.2
MLTR31A_MM:ERVK:LTR	45.5049	2.99158	1.22428	2.44355	0.0145435	0.0464324	MLTR31A_MM	ERVK	LTR	Up	8cWT-2cWT	NA	MLTR31A_MM:ERVK:LTR	8.56148	0.792254	0	22.4811	0	2.97459	0	54.5213	19.209	3.37382	166.478	23.322	8.68035	64.9862	79.6692	34.1047	20.3355	2.88185	115.465	68.3922	1.89748	2.26557	120.966	15.7326	1.47813	88.2821	0.649327	0	1.60374	110.698	8.18601	20.2139	74.975	105.848	11.9668	0
ERVB2_1-I_MM-int:ERVK:LTR	13.188	4.24695	1.74289	2.43673	0.0148208	0.0471541	ERVB2_1-I_MM-int	ERVK	LTR	Up	8cWT-2cWT	NA	ERVB2_1-I_MM-int:ERVK:LTR	2.33495	0	0	8.99243	0	0	63.2136	47.0012	13.2986	6.74764	0	0.496213	1.44673	77.1711	0.808825	0.532886	19.7859	0	0	15.6623	0	0	60.1295	0	0	67.6034	1.29865	4.87887	0	8.30236	43.5613	6.28877	0	16.1293	22.2715	0
RMER17B:ERVK:LTR	248.775	1.7101	0.70438	2.42781	0.0151902	0.0480887	RMER17B	ERVK	LTR	Up	8cWT-2cWT	NA	RMER17B:ERVK:LTR	156.442	214.701	26.675	112.405	21.238	16.3602	299.433	315.848	282.225	43.8597	261.142	77.9054	779.785	344.078	303.714	38.9007	137.951	585.016	251.243	262.605	185.953	276.4	147.848	287.22	36.9532	1614.53	147.397	171.98	72.1684	143.908	347.613	286.139	297.557	74.598	511.58	47.3881
MT2_Mm:ERVL:LTR	42795.3	-3.44824	0.31488	-10.951	6.57376e-28	4.18142e-25	MT2_Mm	ERVL	LTR	Down	NA	2cWT-2cKO:8cWT-8cKO:8cWT-2cWT:8cKO-2cKO	MT2_Mm:ERVL:LTR	12371.3	14598.5	25584.9	26635.6	42841.2	22452.2	2291.22	1081.03	1961.79	3036.44	1723.54	2221.54	2945.53	2392.88	58038.4	81186.3	103028	77745.9	109641	132967	74224.7	61736.9	118769	110321	97151.4	108694	36100	80738.5	60205.3	6228.62	6196.81	8165.52	15325.4	22271.5	12857.3	17387.8
MERVL-int:ERVL:LTR	403401	-3.64889	0.355594	-10.2614	1.0518e-24	4.04529e-22	MERVL-int	ERVL	LTR	Down	NA	2cWT-2cKO:8cWT-8cKO:8cWT-2cWT:8cKO-2cKO	MERVL-int:ERVL:LTR	104936	156055	256226	273015	400552	222883	29474.2	12360.7	10580.7	19480.4	16953	14995.5	31761.4	14662.5	503832	828850	932639	628298	1.05704e+06	1.22335e+06	702380	606772	1.2245e+06	895008	999523	778913	334840	805605	578983	61990.1	59870.7	83712.1	183280	220971	104990	189709
MERVL_2A-int:ERVL:LTR	18298.5	-2.74814	0.339829	-8.08683	6.12368e-16	6.32959e-14	MERVL_2A-int	ERVL	LTR	Down	NA	2cWT-2cKO:8cWT-8cKO:8cWT-2cWT:8cKO-2cKO	MERVL_2A-int:ERVL:LTR	4588.95	7369.54	12782.6	13335.8	20940.6	9597.5	2279.02	1071.63	1357.93	1450.74	2534.71	1595.82	1821.43	1503.97	21239.7	36486.7	39574.5	29100.2	44899.8	55770.4	29245.9	27577.7	54043	40338.3	42342.4	36468.5	15285.8	31463.8	28006.2	3812.63	3134.66	4000.56	9089.55	11196.7	5096.85	9484.91
LTR101_Mam:ERVL:LTR	22.225	-8.29392	1.98662	-4.17488	2.98138e-05	0.00027204	LTR101_Mam	ERVL	LTR	Down	NA	8cWT-8cKO:8cWT-2cWT	LTR101_Mam:ERVL:LTR	60.7087	0	0	0	361.045	153.191	0	0	0	0	1.63214	0	0	0.580233	0	0	0.549607	0	2.6728	0.522078	3.79496	0	0.707406	10.085	2.95625	120.891	0.649327	0.609858	0	0	19.0032	11.2299	0	64.5171	6.98062	0
ERVL-int:ERVL:LTR	84.3672	-2.62124	0.813153	-3.22355	0.0012661	0.00641508	ERVL-int	ERVL	LTR	Down	NA	8cWT-8cKO:8cWT-2cWT:8cKO-2cKO	ERVL-int:ERVL:LTR	53.7038	36.8398	30.2316	89.9243	33.9807	60.979	0	0.626682	36.9405	0	0	0	7.23363	17.407	89.3751	95.9195	153.89	136.168	214.893	180.639	424.087	74.764	258.203	270.278	117.511	89.0774	14.2852	101.236	140.328	4.61242	16.9567	26.5027	171.037	44.3555	46.2051	3.64524
MT2C_Mm:ERVL:LTR	5165.79	-0.765113	0.241947	-3.16231	0.00156522	0.0076721	MT2C_Mm	ERVL	LTR	Down	NA	8cWT-2cWT:8cKO-2cKO	MT2C_Mm:ERVL:LTR	4317.32	3509.29	5362.56	11042.7	4506.69	3081.67	3528.87	3121.5	4421.53	1825.24	2529.81	3787.59	2670.65	3036.94	7468.28	4594.54	7602.72	6285.32	7016.09	7104.43	8248.35	3206.92	7017.47	7360.83	8908.67	5005.83	7765.95	5925.38	7802.21	3068.18	3263.88	3554.95	3823.73	4318.62	4426.38	5136.14
MT2B2:ERVL:LTR	2326.8	-0.741382	0.245963	-3.0142	0.00257656	0.0114979	MT2B2	ERVL	LTR	Down	NA	2cWT-2cKO:8cWT-8cKO:8cWT-2cWT:8cKO-2cKO	MT2B2:ERVL:LTR	978.344	1262.85	2420.31	1731.04	1287.02	1180.91	802.924	778.966	870.81	435.223	1481.98	917.001	933.138	838.437	4077.29	3199.98	3168.49	2521.62	5180.95	5804.46	3468.59	2145.5	2304.73	4769.39	2774.44	3886	3053.78	2505.3	3403.14	2126.33	1721.69	2212.75	1575.65	2864.96	1928.98	2974.51
MLT2D:ERVL:LTR	76.07	3.71663	1.01964	3.64503	0.000267356	0.00172919	MLT2D	ERVL	LTR	Up	8cWT-2cWT	2cWT-2cKO	MLT2D:ERVL:LTR	3.11327	0	52.4608	4.49622	8.49518	2.97459	96.484	79.5886	59.5973	280.027	210.546	146.879	245.943	164.206	141.14	9.59195	23.6331	67.0031	22.9861	23.4935	1.89748	2.26557	19.1	40.7434	48.0391	641.835	2.59731	92.0886	2.40561	2.76745	45.0231	81.3048	31.6301	95.7676	57.1746	7.29047
MER74B:ERVL:LTR	18.8936	5.92615	1.97551	2.99982	0.00270142	0.0119506	MER74B	ERVL	LTR	Up	8cWT-2cWT	2cWT-2cKO:8cKO-2cKO	MER74B:ERVL:LTR	0.778316	0	0	0	0	0	6.65407	1.25336	0	0	0	0.496213	183.734	0	46.5074	0	44.5182	0	18.7096	0	74.9505	94.0213	3.53703	27.8346	0	159.862	0	0.609858	25.6599	0	0.877073	4.04278	4.68594	0	0.332411	0
MER21C:ERVL:LTR	257.774	1.54751	0.556026	2.78316	0.00538326	0.0209478	MER21C	ERVL	LTR	Up	8cWT-2cWT	2cWT-2cKO	MER21C:ERVL:LTR	26.4628	150.132	77.3574	364.194	16.9904	7.43647	154.153	132.857	200.956	212.551	633.27	411.36	315.386	405.583	256.802	304.811	402.862	87.1761	391.298	390.514	256.16	295.657	99.0369	305.777	80.5579	914.634	172.072	323.225	206.081	273.978	330.364	328.813	145.264	251.012	296.178	236.94
LTR33A:ERVL:LTR	23.5627	4.11665	1.56915	2.62349	0.00870345	0.0308879	LTR33A	ERVL	LTR	Up	8cWT-2cWT	NA	LTR33A:ERVL:LTR	7.78316	5.54577	0	4.49622	4.24759	0	0	1.25336	44.8211	313.765	146.892	1.98485	2.89345	1.16047	140.735	1.59866	5.49607	0	14.4331	5.22078	0.94874	0	0	16.5394	0	47.72	0.649327	1.21972	1.60374	0.922485	28.0663	58.3957	0	12.097	1.32964	0
LTR55:ERVL:LTR	15.8546	6.06163	2.43102	2.49346	0.0126506	0.0415853	LTR55	ERVL	LTR	Up	8cWT-2cWT	NA	LTR55:ERVL:LTR	0	0	0	4.49622	0	0	0	62.6682	106.389	0	0	0	44.8485	0	0	0.532886	1.09921	0	0.534559	0	0	0	0	0.4034	21.4328	134.411	0	59.7661	75.3759	63.6514	0.292358	1.34759	9.37188	0	0	0
ORR1A0:ERVL-MaLR:LTR	6577.88	-3.02585	0.28086	-10.7735	4.59137e-27	2.44942e-24	ORR1A0	ERVL-MaLR	LTR	Down	NA	8cWT-8cKO:8cWT-2cWT	ORR1A0:ERVL-MaLR:LTR	3212.11	2804.97	5326.99	11946.4	7853.8	8377.92	845.066	822.207	692.018	843.455	636.534	616.296	1043.09	967.829	6925.97	13668.5	7586.23	11174.4	7976.16	11575.5	7369.81	10619.9	13207.3	11604.6	12076.3	6485.95	6432.23	9358.89	6428.6	3055.27	4354.67	6761.78	6618.89	7032.37	8166.33	7516.48
MTA_Mm-int:ERVL-MaLR:LTR	999114	-4.1789	0.392497	-10.647	1.80143e-26	8.76236e-24	MTA_Mm-int	ERVL-MaLR	LTR	Down	NA	2cWT-2cKO:8cWT-8cKO:8cWT-2cWT:8cKO-2cKO	MTA_Mm-int:ERVL-MaLR:LTR	366227	332357	307201	1.08899e+06	593499	575733	38381.8	32595.6	33883.8	40475.7	23638.3	14761.3	33051.9	23492.5	2.03485e+06	2.07557e+06	2.95762e+06	1.51521e+06	2.0566e+06	3.23781e+06	1.6179e+06	2.29061e+06	1.75567e+06	1.94608e+06	1.90203e+06	3.82987e+06	1.32931e+06	1.58978e+06	1.3596e+06	157423	58623.8	149121	215005	183965	69774.6	429088
MTA_Mm:ERVL-MaLR:LTR	168459	-3.74767	0.357748	-10.4757	1.11681e-25	5.1305e-23	MTA_Mm	ERVL-MaLR	LTR	Down	NA	2cWT-2cKO:8cWT-8cKO:8cWT-2cWT:8cKO-2cKO	MTA_Mm:ERVL-MaLR:LTR	65748.3	61861.5	57435.7	186449	102439	105763	7582.31	7998.34	7274.81	10118.1	6301.69	3593.08	8746.9	5929.99	334746	334308	500483	398411	353454	508676	237632	402052	279745	348279	295186	624711	222398	249880	219155	22629.5	11501.6	26419.6	34781.4	26675.8	13502.5	54015.1
MT-int:ERVL-MaLR:LTR	37586.6	-4.07808	0.393214	-10.3711	3.35496e-25	1.35328e-22	MT-int	ERVL-MaLR	LTR	Down	NA	2cWT-2cKO:8cWT-8cKO:8cWT-2cWT:8cKO-2cKO	MT-int:ERVL-MaLR:LTR	16382.8	15754.4	16474.5	46846.1	32358.1	26351.9	1950.75	1497.14	1460.87	1761.13	1150.66	659.963	2008.05	1683.26	78125.6	74433	96722.6	58419.5	72916.6	120193	70280.8	74087.7	72295.5	63004.6	69376.6	136502	43819.2	60852.3	50643.8	6067.18	2628.88	5485.6	9394.14	7283.38	2918.9	18831.3
ORR1A0-int:ERVL-MaLR:LTR	63449.2	-3.1529	0.32834	-9.60255	7.79923e-22	1.9543e-19	ORR1A0-int	ERVL-MaLR	LTR	Down	NA	8cWT-8cKO:8cWT-2cWT	ORR1A0-int:ERVL-MaLR:LTR	27308	23834.6	67063.6	89704	52428	80208.2	9234.74	5028.5	4987.46	8060.06	4646.7	4002.45	8800.43	6293.79	63269.5	113049	78100.3	61653.7	65478.2	120386	84073.6	88969.1	139152	102180	137498	35149.8	63947	90712.8	66943.4	36502.7	42821.6	57331.6	79446.6	88246.4	74810.7	101990
ORR1A1-int:ERVL-MaLR:LTR	40705.6	-2.41825	0.313083	-7.724	1.12734e-14	9.46394e-13	ORR1A1-int	ERVL-MaLR	LTR	Down	NA	8cWT-8cKO:8cWT-2cWT	ORR1A1-int:ERVL-MaLR:LTR	22363.4	15586	33317	51994.3	32235	42945.6	7387.12	4729.57	5750.4	9446.7	5438.28	4522.48	6478.43	5752.43	49442.2	75317.1	32701.1	45944	30775.7	62123.1	53745.2	56631.4	64783.6	39655.4	82234.8	16325	45986.6	38205.8	51069.6	36702.9	32027.8	46825.7	58295.4	62582.6	48427.2	98282.9
MTB-int:ERVL-MaLR:LTR	4016.67	-2.56	0.392377	-6.52433	6.83081e-11	2.60295e-09	MTB-int	ERVL-MaLR	LTR	Down	NA	2cWT-2cKO:8cWT-8cKO:8cWT-2cWT:8cKO-2cKO	MTB-int:ERVL-MaLR:LTR	1654.7	1639.96	1484.02	5094.21	1979.38	1930.51	268.381	378.516	561.988	728.745	582.673	159.284	114.291	327.252	7152.03	7452.41	14492	5338.63	7367.83	11468.5	7046.29	8601.25	8107.58	6728.3	7870.29	13528.6	4617.36	7070.7	5164.05	827.469	548.755	623.936	1068.39	1281.27	517.231	1921.04
ORR1A2-int:ERVL-MaLR:LTR	12274.7	-1.45548	0.237598	-6.1258	9.02292e-10	2.63113e-08	ORR1A2-int	ERVL-MaLR	LTR	Down	NA	2cWT-2cKO:8cWT-8cKO:8cWT-2cWT:8cKO-2cKO	ORR1A2-int:ERVL-MaLR:LTR	7155.06	6565.4	13720.7	10143.5	9365.94	9936.61	4867.45	1972.17	3962.97	3616.74	3576.01	2726.19	4121.72	2817.61	18343.7	25396.8	19821	16531	16038.4	20923.8	18413.2	18201.6	21118.2	14841.9	26880.5	16189.8	12608.6	14681.7	14486.6	8600.33	6762.52	11775.3	11126.8	9136.23	11697.2	10607.6
ORR1A1:ERVL-MaLR:LTR	3839.55	-1.55774	0.267926	-5.81406	6.09764e-09	1.45516e-07	ORR1A1	ERVL-MaLR	LTR	Down	NA	2cWT-2cKO:8cWT-8cKO:8cWT-2cWT	ORR1A1:ERVL-MaLR:LTR	1769.89	1588.07	3693.59	4941.34	3550.99	3234.86	1875.34	962.584	1440.68	867.072	569.616	986.471	873.822	912.127	4911.18	7634.66	3361.95	6861.69	3137.33	5152.91	4739.91	6060.41	7490.02	4841.6	5490.5	3656.95	5312.14	3727.45	4120.02	2990.7	3429.06	4368	4859.32	4671.44	6067.49	4447.19
ORR1A3-int:ERVL-MaLR:LTR	2370.95	-1.66771	0.323111	-5.1614	2.4511e-07	4.04553e-06	ORR1A3-int	ERVL-MaLR	LTR	Down	NA	2cWT-2cKO:8cWT-8cKO:8cWT-2cWT:8cKO-2cKO	ORR1A3-int:ERVL-MaLR:LTR	1302.9	1093.31	3021.39	2216.63	1503.65	1915.63	833.976	467.505	845.198	408.232	287.256	378.114	776.891	635.936	3100.63	4573.23	3628.51	2924.36	3079.6	3877.99	3072.02	3664.57	4261.42	3233.25	5006.42	6023.86	2128.49	3092.59	2992.58	952.004	1213.28	1577.13	1220.69	2282.29	1741.83	2697.48
MTB_Mm-int:ERVL-MaLR:LTR	779.412	-1.93211	0.375829	-5.14094	2.73372e-07	4.46742e-06	MTB_Mm-int	ERVL-MaLR	LTR	Down	NA	8cWT-8cKO:8cWT-2cWT:8cKO-2cKO	MTB_Mm-int:ERVL-MaLR:LTR	505.127	464.261	921.176	687.921	1036.41	608.303	238.437	88.3622	276.315	468.961	24.4821	78.4016	228.583	84.7141	1330.92	1053.52	1424.58	1105.91	2476.08	1816.31	982.895	1344.62	986.124	920.961	1337.7	1726.67	1012.95	1145.31	945.407	480.615	250.843	264.128	477.966	461.701	422.494	481.171
MTB:ERVL-MaLR:LTR	2225.24	-0.971551	0.329974	-2.94432	0.00323661	0.0138959	MTB	ERVL-MaLR	LTR	Down	NA	2cWT-2cKO:8cWT-2cWT:8cKO-2cKO	MTB:ERVL-MaLR:LTR	1183.82	964.965	818.033	2607.81	1333.74	1430.78	303.869	513.253	1222.48	725.372	739.359	848.028	568.563	734.576	3061.81	3002.81	5078.92	4010.1	4012.4	5567.44	3125.15	4305.72	2873.48	3995.27	3389.34	8592.79	2333.03	2309.53	2748.01	866.213	922.973	1250.57	654.86	1057.48	817.065	1381.54
MTC-int:ERVL-MaLR:LTR	1244.33	-0.839423	0.306693	-2.73701	0.00620006	0.0234895	MTC-int	ERVL-MaLR	LTR	Down	NA	8cWT-8cKO:8cWT-2cWT:8cKO-2cKO	MTC-int:ERVL-MaLR:LTR	826.572	757.79	812.698	2063.76	1282.77	584.506	714.203	731.965	770.825	215.925	355.806	530.451	833.314	532.654	1203.13	1178.74	2133.57	1652.02	2207.2	1989.64	1646.06	1807.93	1953.86	1821.35	1127.07	3621.95	1223.98	1386.82	1306.25	856.988	879.119	1116.26	861.041	719.769	999.891	1140.96
ORR1D-int:ERVL-MaLR:LTR	1254.67	-0.995728	0.369198	-2.69701	0.00699659	0.0259322	ORR1D-int	ERVL-MaLR	LTR	Down	NA	8cWT-2cWT:8cKO-2cKO	ORR1D-int:ERVL-MaLR:LTR	839.025	588.248	577.069	4217.45	2760.93	1781.78	547.852	761.419	949.617	1056.01	1064.15	669.887	1255.76	875.572	953.604	889.92	2263.83	1464.7	1850.64	915.724	805.48	1856.64	1723.95	2420.4	1420.48	1521.47	683.092	1597.83	1659.07	607.917	459.586	633.369	798.953	906.264	468.699	1100.86
ORR1A4-int:ERVL-MaLR:LTR	2032.66	-0.73288	0.282314	-2.59597	0.00943236	0.0329376	ORR1A4-int	ERVL-MaLR	LTR	Down	NA	2cWT-2cKO:8cWT-8cKO:8cWT-2cWT	ORR1A4-int:ERVL-MaLR:LTR	1205.61	1228.39	1519.58	3025.95	1333.74	1006.9	991.456	1080.4	641.287	576.923	985.812	1008.3	1359.92	811.747	2815.52	2835.49	2388.04	1750.73	2377.72	2147.83	2400.31	2468.34	2122.22	2728.59	3857.17	5965.8	1853.83	2268.67	2677.45	1502.73	1314.15	2032.17	2670.99	2476.85	1267.81	3966.02
MTE2b-int:ERVL-MaLR:LTR	147.106	2.742	0.820152	3.34328	0.000827949	0.00453548	MTE2b-int	ERVL-MaLR	LTR	Up	8cWT-2cWT	NA	MTE2b-int:ERVL-MaLR:LTR	90.2847	108.143	8.00249	8.99243	0	14.8729	8.87209	172.338	211.792	590.419	226.867	255.55	520.821	128.232	16.9853	65.0121	57.7088	186.6	92.4788	46.987	73.053	15.859	86.3036	188.388	317.797	671.262	49.3488	65.2549	36.0842	273.978	95.6009	142.845	15.2293	274.198	108.033	218.714
MMSAT4:Satellite:Satellite	4409.47	-0.805497	0.327761	-2.45757	0.0139879	0.0451204	MMSAT4	Satellite	Satellite	Down	NA	8cWT-8cKO:8cWT-2cWT	MMSAT4:Satellite:Satellite	1630.57	3563.95	4479.62	4253.42	2667.49	6081.54	1853.16	1953.37	1573.17	2624.83	2994.97	3057.66	970.752	2274.52	8217.66	6913.13	6275.96	7288.21	6675.04	3471.82	3649.8	1389.93	6859.01	3415.99	5148.32	7879.37	2116.16	5590.57	4319.68	4416.86	6911.33	3130.01	4608.62	4866	6746.94	7363.38
MurSAT1:Satellite:Satellite	4.12598	5.87725	1.73009	3.39709	0.000681077	0.00383117	MurSAT1	Satellite	Satellite	Up	8cWT-2cWT:8cKO-2cKO	NA	MurSAT1:Satellite:Satellite	0	0	0	0	0	0	5.54506	0.626682	65.0152	0	0	0	47.7419	6.38257	0.404412	1.06577	0	0	0	0	0	1.13279	0	0.4034	0	0	0	0.609858	0	5.53491	1.46179	107.807	0	1.00808	11.6344	3.64524
IMPB_01:Satellite:Satellite	1867.78	1.19935	0.389535	3.07893	0.00207745	0.00964269	IMPB_01	Satellite	Satellite	Up	8cWT-2cWT	2cWT-2cKO:8cKO-2cKO	IMPB_01:Satellite:Satellite	675.579	794.234	790.468	1236.46	310.074	1008.38	1858.7	1332.33	1189.48	2918.36	2404.14	1368.06	2647.51	1033.4	2892.76	1614.65	1131.64	2233.44	1179.77	2797.81	1723.86	2963.37	1984.27	3328.45	2152.89	9897.93	1468.13	2296.12	1250.92	1805.3	1500.67	1381.73	659.546	1840.75	1144.82	944.116
(CATTC)n:Satellite:Satellite	44.7991	6.56633	2.22225	2.95481	0.00312859	0.0135305	(CATTC)n	Satellite	Satellite	Up	8cWT-2cWT	2cWT-2cKO	(CATTC)n:Satellite:Satellite	2.33495	0	0.889166	0	0	0	96.484	19.4271	275.822	10.1215	0	70.9584	0	0	0.404412	0	78.5938	95.1012	0	0	0.94874	259.408	13.4407	622.849	0	0	3.24663	1.21972	0	0	0.877073	102.417	0	3.02424	0	0
B1_Mus2:Alu:SINE	22317.6	1.51534	0.33292	4.55165	5.32268e-06	6.01685e-05	B1_Mus2	Alu	SINE	Up	8cWT-2cWT:8cKO-2cKO	NA	B1_Mus2:Alu:SINE	7377.66	10605.9	9079.27	15871.6	14586.2	7614.94	27849.5	23800.8	37204.5	34777.3	24881.9	36747.5	28977.9	33971.5	15376.2	12527.6	20303.6	12334.3	18059	19000.5	13556.5	15233.7	13055.2	22365.7	11709.7	61208.1	9395.11	9466.22	13938.1	26503.9	20839.3	22300	23389.9	31819.1	17767.7	46564.3
B1_Mm:Alu:SINE	13747.8	1.72286	0.395878	4.35199	1.34907e-05	0.000136793	B1_Mm	Alu	SINE	Up	8cWT-2cWT:8cKO-2cKO	NA	B1_Mm:Alu:SINE	3221.45	4994.37	4333.79	12378.1	7590.44	4997.31	19104.9	16526.2	23309.4	20438.6	19151.5	23882.7	17687.7	24937.3	6936.88	5365.63	11055.9	5669.33	8725.08	9648.52	5197.2	6379.86	8067.26	9854.65	6203.7	37525.5	4205.04	5300.28	7127.84	16225.6	14259.2	15047.2	12923.8	20779.6	11032.4	39299.3
B1_Mus1:Alu:SINE	26257.9	1.2835	0.328699	3.90477	9.43144e-05	0.000722786	B1_Mus1	Alu	SINE	Up	8cWT-2cWT:8cKO-2cKO	NA	B1_Mus1:Alu:SINE	8706.25	11968.2	13261	22696.9	15223.4	10113.6	31850.8	24371.7	38651.6	31676.8	30269.6	41456.1	32619.3	35101.2	16788.8	13926.4	21646.8	13243.6	21740.5	22310	17280.4	18015.8	19959.5	21202.3	15243.2	71670.7	10858	13017.4	15047.1	31434.6	27037.2	27986.8	30612.1	44091.4	21742	56114.8
PB1:Alu:SINE	3238.2	0.899504	0.269974	3.33181	0.000862816	0.00469692	PB1	Alu	SINE	Up	8cWT-2cWT	NA	PB1:Alu:SINE	1597.88	1977.86	1593.39	4491.72	3037.03	1784.75	3630.9	5167.62	3729.02	4244.27	4907.84	4262.47	4819.04	5178.58	1772.54	1958.89	1817.55	1783.15	2138.77	2247.54	3455.31	2406.04	2810.53	3386.54	2668.02	7304.35	2349.91	2475.42	2466.56	3427.95	3128.52	3363.14	4869.86	2488.95	2986.71	4097.25
B1_Mur4:Alu:SINE	8273.86	0.758016	0.277454	2.73204	0.00629426	0.023793	B1_Mur4	Alu	SINE	Up	8cWT-2cWT	NA	B1_Mur4:Alu:SINE	4670.68	5128.65	6094.34	7369.3	6715.44	5059.77	8662.49	7381.69	8763.76	11649.8	12303.1	9581.87	12298.6	8347.24	7330.78	7587.23	7353.74	7306.94	7800.83	7326.32	7889.72	7563.62	8490.29	8743.28	6749.87	27092.3	5217.34	6036.99	4946.75	9763.58	6901.69	7482.74	4865.18	8942.68	5855.41	8281.98
B3:B2:SINE	99710.7	-1.72974	0.340834	-5.07503	3.87433e-07	6.05611e-06	B3	B2	SINE	Down	NA	8cWT-2cWT:8cKO-2cKO	B3:B2:SINE	63012.5	69902.9	99367	418081	259354	123145	45126.8	50414.7	35745.6	53596.5	48539.8	36067.2	81049.9	64665.9	89981.7	84862.7	131711	91353.3	128840	102021	83086.9	136940	131439	150238	87726.8	183270	81312	141234	117827	64350.7	38448.8	47196.3	63754.6	49174.2	26683.6	120876
B2_Mm2:B2:SINE	42594.8	1.24483	0.41221	3.01991	0.00252853	0.0113287	B2_Mm2	B2	SINE	Up	8cWT-2cWT:8cKO-2cKO	NA	B2_Mm2:B2:SINE	9589.64	15797.9	15356.8	26685	27125.1	24001.9	38551.4	25965.3	48301.9	51788.2	46248.3	67999	47156	48583.5	20261.9	16132.6	29543	17147	20847.8	25923.3	19469.1	22194.7	27961.7	33539.8	19228.2	94251.9	12158.6	15769.1	19431.8	39835.7	40193.6	54991.3	54878.2	90181.9	30140	150260
AmnSINE1:Deu:SINE	95.1122	1.83826	0.717631	2.56157	0.0104201	0.0357749	AmnSINE1	Deu	SINE	Up	8cWT-2cWT	NA	AmnSINE1:Deu:SINE	69.2702	63.3803	20.4508	40.466	42.4759	11.8983	36.5974	53.268	61.5675	435.223	132.203	47.6364	140.332	285.475	15.7721	58.6175	152.241	83.5738	58.8015	201	48.3858	149.528	24.0518	188.791	36.9532	447.773	25.9731	34.1521	10.4243	53.5041	117.528	66.0321	206.181	6.04848	26.5928	51.0333
ID2:ID:SINE	599.915	1.24347	0.483054	2.57419	0.0100475	0.0346657	ID2	ID	SINE	Up	8cWT-2cWT	NA	ID2:ID:SINE	295.76	433.759	500.6	386.675	458.74	93.6995	1043.58	761.419	735.854	2452.77	244.821	486.288	475.973	653.343	400.368	280.298	244.026	360.232	558.08	441.678	606.245	659.282	812.102	691.83	245.369	2658.8	292.197	276.266	395.323	972.299	580.622	426.738	550.598	537.307	525.209	331.717
[truncated: 1 more columns]

## Sheet: FOURWAY_8cKO_vs_2cKO_DE_TEmulti
Figure 1–figure supplement 5–Source Data 1. Differential TE Expression (DTE) – Multimapping Reads. TE expression analysis by DESeq2 (v146.0) using multimapped reads across four comparisons.
tetranscripts_id	baseMean	log2FoldChange	lfcSE	stat	pvalue	padj	gene_id	family_id	class_id	Direction	FOUR_WAY_UP_COMP	FOUR_WAY_DOWN_COMP	tetranscripts_id	TZSC118	TZSC119	TZSC120	TZSC121	TZSC122	TZSC123	TZSC125	TZSC126	TZSC127	TZSC128	TZSC129	TZSC130	TZSC131	TZSC132	TZSC94	TZSC95	TZSC96	TZSC97	TZSC98	TZSC99	TZSC100	TZSC101	TZSC102	TZSC103	TZSC104	TZSC105	TZSC106	TZSC107	TZSC108	TZSC109	TZSC110	TZSC111	TZSC112	TZSC113	TZSC114	TZSC115
														2c WT	2c WT	2c WT	2c WT	2c WT	2c WT	8c WT	8c WT	8c WT	8c WT	8c WT	8c WT	8c WT	8c WT	2c KO	2c KO	2c KO	2c KO	2c KO	2c KO	2c KO	2c KO	2c KO	2c KO	2c KO	2c KO	2c KO	2c KO	2c KO	8c KO	8c KO	8c KO	8c KO	8c KO	8c KO	8c KO
MER113A:hAT-Charlie:DNA	11.0224	-6.84341	2.08416	-3.28353	0.00102517	0.00410111	MER113A	hAT-Charlie	DNA	Down	NA	8cKO-2cKO	MER113A:hAT-Charlie:DNA	0	1.98063	0	0	0	0	56.5596	0	0	0	0	0	0	0.580233	38.4192	5.86175	0	0	0	0	84.4379	4.53115	1.41481	1.6136	0	74.7614	87.6591	50.0084	0	0	0	0	0	0	0	0
RCHARR1:hAT-Charlie:DNA	1075.79	-0.903717	0.276341	-3.2703	0.00107433	0.00426373	RCHARR1	hAT-Charlie	DNA	Down	NA	8cKO-2cKO	RCHARR1:hAT-Charlie:DNA	859.261	734.815	747.788	2517.88	2310.69	1122.91	500.164	643.602	934.84	1039.14	778.53	633.664	765.318	1144.22	987.575	868.072	1288.83	1239.92	1347.62	905.805	825.404	1588.17	1407.74	1791.9	1183.24	3652.17	449.334	1072.13	892.483	437.258	580.915	653.134	529.511	836.707	659.835	1108.15
MER58D:hAT-Charlie:DNA	11.8711	-4.05902	1.49394	-2.71698	0.00658797	0.0202052	MER58D	hAT-Charlie	DNA	Down	NA	2cWT-2cKO:8cKO-2cKO	MER58D:hAT-Charlie:DNA	0	0.396127	0	4.49622	0	0	0	10.0269	7.88064	0	1.63214	0	1.44673	1.16047	0.808825	31.9732	4.39686	0	0	49.5974	133.772	0	8.48888	0	0	104.984	0.649327	67.0844	0	0.922485	9.06309	0.449198	0	0	0	0
Charlie4z:hAT-Charlie:DNA	69.8873	-1.91711	0.731856	-2.61952	0.00880532	0.0258092	Charlie4z	hAT-Charlie	DNA	Down	NA	8cKO-2cKO	Charlie4z:hAT-Charlie:DNA	35.8026	80.8099	1.77833	0	21.238	89.2376	112.01	36.3476	76.8362	6.74764	76.7105	67.9811	46.2952	59.1838	33.1618	216.352	258.865	87.8965	61.4743	41.2441	25.616	79.2951	277.303	13.7156	26.6063	57.2641	277.263	181.128	12.8299	0	109.926	1.34759	7.02891	16.1293	86.7591	3.64524
MER33:hAT-Charlie:DNA	151.498	-1.52674	0.600973	-2.54046	0.0110708	0.0313329	MER33	hAT-Charlie	DNA	Down	NA	8cKO-2cKO	MER33:hAT-Charlie:DNA	159.555	146.171	200.951	184.345	4.24759	46.1061	156.371	41.361	69.4481	327.261	79.9748	194.515	350.107	160.725	193.309	62.3477	189.614	108.79	283.851	215.096	260.904	225.425	271.644	227.114	100.513	572.641	61.6861	173.81	3.20749	15.6822	199.096	129.369	4.68594	64.5171	113.02	0
MER45B:hAT-Tip100:DNA	51.7901	-2.76024	0.765325	-3.60663	0.000310201	0.00144583	MER45B	hAT-Tip100	DNA	Down	NA	8cKO-2cKO	MER45B:hAT-Tip100:DNA	32.6893	30.1056	106.7	4.49622	8.49518	14.8729	1.10901	29.4541	31.5225	23.6167	127.307	2.97728	186.628	79.492	84.1178	27.7101	101.677	186.6	34.7464	36.5454	12.3336	57.7721	157.044	139.576	5.91251	170.997	2.59731	57.3267	75.3759	6.45739	0.584715	9.88235	53.8883	0	15.6233	0
Zaphod2:hAT-Tip100:DNA	11.6276	-5.9307	1.95264	-3.03728	0.00238725	0.008485	Zaphod2	hAT-Tip100	DNA	Down	NA	8cKO-2cKO	Zaphod2:hAT-Tip100:DNA	0	0	76.4683	0	63.7139	1.48729	0	21.9339	0	0	0	0	2.89345	0	0	0.532886	0	119.597	0	0	0	5.66394	0	11.2952	0.739063	100.212	0.649327	0.609858	23.2543	0	0	0	1.17149	0	0	0
Kanga1c:TcMar-Tc2:DNA	13.5494	-5.30091	1.7512	-3.02702	0.00246977	0.00872326	Kanga1c	TcMar-Tc2	DNA	Down	8cWT-8cKO	8cKO-2cKO	Kanga1c:TcMar-Tc2:DNA	0	69.7183	0	0	0	11.8983	2.21802	0	94.5676	37.112	0	0.496213	49.1887	23.7896	0	11.7235	1.09921	4.32278	85.5295	86.1428	0	0	0	15.3292	0	7.15801	0	0	0	0	0.584715	0.449198	0	0	0	0
Kanga2_a:TcMar-Tc2:DNA	19.8981	-3.057	1.24684	-2.45179	0.0142147	0.038648	Kanga2_a	TcMar-Tc2	DNA	Down	NA	8cKO-2cKO	Kanga2_a:TcMar-Tc2:DNA	16.3446	8.71479	0	0	55.2187	7.43647	1.10901	5.64014	146.777	6.74764	22.8499	2.97728	49.1887	1.16047	14.1544	40.4994	56.6095	2.16139	122.414	1.04416	133.772	0	0	1.2102	0	16.702	0	1.21972	0	0	9.94016	10.3316	0	1.00808	0.997232	0
Tigger5:TcMar-Tigger:DNA	104.921	-1.99057	0.630474	-3.15725	0.00159262	0.0059954	Tigger5	TcMar-Tigger	DNA	Down	NA	8cKO-2cKO	Tigger5:TcMar-Tigger:DNA	42.0291	112.896	154.715	17.9849	148.666	19.3348	57.6686	132.857	152.687	0	146.892	46.1478	88.2502	179.872	148.824	28.7759	34.0756	107.349	191.907	202.044	116.695	40.7803	9.90369	453.018	109.381	586.161	204.538	40.2507	11.2262	64.5739	59.3486	54.8021	14.0578	30.2424	70.471	3.64524
Tigger18a:TcMar-Tigger:DNA	27.2762	-2.96418	1.11425	-2.66024	0.00780848	0.0233513	Tigger18a	TcMar-Tigger	DNA	Down	NA	8cKO-2cKO	Tigger18a:TcMar-Tigger:DNA	1.55663	0.396127	0	0	0	25.284	9.9811	38.2276	9.35825	128.205	0	0	30.3812	65.5664	6.4706	61.2819	18.137	0.720463	117.603	0.522078	8.53866	115.544	0.707406	14.9258	1.47813	192.471	4.54529	0.609858	114.668	1.84497	0.584715	33.2406	0	5.0404	1.32964	0
Tigger11a:TcMar-Tigger:DNA	9.5486	7.95659	2.55879	3.10951	0.00187395	0.00688709	Tigger11a	TcMar-Tigger	DNA	Up	8cKO-2cKO	NA	Tigger11a:TcMar-Tigger:DNA	0	0	0	0	0	0	0	0	0	0	0	0	0	0	0	0.532886	0.549607	0	0	0	0	0	0	0	0	0	0	0	0.801872	0	101.74	0	0	0	45.5402	204.133
L1M4b:L1:LINE	411.664	-1.74985	0.444576	-3.93599	8.28546e-05	0.000457164	L1M4b	L1	LINE	Down	NA	2cWT-2cKO:8cKO-2cKO	L1M4b:L1:LINE	105.073	117.65	375.228	669.936	199.637	65.4409	296.106	261.953	199.971	23.6167	26.1142	97.7539	114.291	302.302	606.214	743.909	513.883	610.233	507.297	910.504	287.468	391.944	618.273	1040.77	220.241	2811.51	627.899	265.288	530.037	291.505	141.209	300.513	133.549	322.586	217.064	69.2595
MusHAL1:L1:LINE	924.124	-1.05831	0.30907	-3.42418	0.000616648	0.00263333	MusHAL1	L1	LINE	Down	8cWT-2cWT	2cWT-2cKO:8cKO-2cKO	MusHAL1:L1:LINE	179.013	183.803	291.646	305.743	144.418	62.4663	221.802	282.007	571.839	438.597	721.405	496.709	1173.29	581.394	847.244	1487.82	1849.98	1874.65	1311.27	1139.7	1612.86	407.803	1524.46	1432.47	2048.68	4367.97	749.973	1232.52	833.946	492.607	623.599	870.096	632.602	852.836	921.774	721.757
L1MEf:L1:LINE	368.941	-1.17837	0.345849	-3.40719	0.000656348	0.00278249	L1MEf	L1	LINE	Down	NA	2cWT-2cKO:8cKO-2cKO	L1MEf:L1:LINE	51.3689	250.748	85.3599	467.607	46.7235	157.653	269.49	199.285	280.255	391.363	217.074	141.917	684.301	252.982	355.883	547.807	438.587	530.261	441.012	967.41	609.091	397.608	482.451	563.549	548.385	1274.13	266.873	187.227	614.234	190.032	111.388	313.091	233.126	251.012	420.499	251.521
Lx3A:L1:LINE	752.024	-1.27491	0.400778	-3.18107	0.00146731	0.00558015	Lx3A	L1	LINE	Down	NA	2cWT-2cKO:8cKO-2cKO	Lx3A:L1:LINE	490.339	510.607	603.744	530.554	42.4759	193.348	548.961	464.998	799.885	364.373	138.732	154.322	1271.67	992.199	615.111	1201.13	1019.52	1246.4	652.163	806.61	1316.85	897.167	925.287	1676.93	1644.42	3202.02	407.128	730.001	649.516	364.381	310.191	530.053	514.282	563.517	1084.66	185.907
Lx2B2:L1:LINE	1150.39	-0.935944	0.3273	-2.85959	0.0042419	0.0138047	Lx2B2	L1	LINE	Down	NA	8cKO-2cKO	Lx2B2:L1:LINE	456.872	333.143	949.629	1596.16	1202.07	682.668	512.363	590.334	923.512	226.046	261.142	206.424	1099.51	838.437	1186.55	1913.59	1806.56	1090.78	2436.52	2537.82	1035.08	1096.54	1757.9	1902.43	1526.9	4671	574.654	1081.89	944.605	1086.69	890.814	953.198	500.224	883.078	1139.5	816.533
L1ME4a:L1:LINE	107.984	-1.76762	0.645562	-2.73811	0.00617937	0.0191161	L1ME4a	L1	LINE	Down	NA	8cKO-2cKO	L1ME4a:L1:LINE	42.8074	195.687	224.07	13.4887	16.9904	5.94917	146.389	6.26682	17.7314	134.953	3.26428	185.584	150.459	55.7024	209.486	33.0389	92.8836	121.038	93.5479	98.1506	115.746	180.113	170.485	253.335	79.0798	342.789	103.892	456.174	72.9703	11.0698	7.01658	100.62	167.522	64.5171	10.9695	3.64524
L1MD:L1:LINE	773.829	-0.917018	0.351985	-2.60527	0.00918009	0.0267307	L1MD	L1	LINE	Down	NA	8cKO-2cKO	L1MD:L1:LINE	584.516	691.241	951.407	206.826	254.855	432.802	492.401	799.646	850.616	799.596	52.2284	491.747	1059	412.546	906.692	797.731	1029.96	657.063	830.171	1365.76	763.736	535.808	1067.48	1108.54	903.135	3408.01	899.318	981.262	774.608	1126.35	361.646	843.144	264.756	478.838	402.217	623.336
L1MEh:L1:LINE	8.55559	-4.33219	1.73271	-2.50024	0.012411	0.0344546	L1MEh	L1	LINE	Down	8cWT-8cKO:8cWT-2cWT	8cKO-2cKO	L1MEh:L1:LINE	0	0	0.889166	4.49622	0	0	159.698	8.77355	1.47762	0	0	56.072	7.23363	2.32093	0	13.3222	30.2284	0	18.7096	0	1.89748	0	0	0.806799	0	10.3393	0	0	0	0	0.292358	0	0	0	0	0
L1M2c:L1:LINE	50.427	-1.73804	0.697781	-2.4908	0.0127454	0.0352356	L1M2c	L1	LINE	Down	NA	8cKO-2cKO	L1M2c:L1:LINE	77.0533	1.18838	0.889166	0	0	87.7503	6.65407	67.055	32.5076	23.6167	48.9641	79.8902	56.4223	29.0117	25.8824	151.873	196.21	108.07	31.0044	114.335	101.515	18.1246	29.0037	35.9026	78.3407	194.062	27.2717	44.5197	18.443	40.5893	21.0497	2.69519	4.68594	19.1535	88.4212	3.64524
L1Md_A:L1:LINE	5916.65	1.64171	0.265133	6.19202	5.93967e-10	9.93812e-09	L1Md_A	L1	LINE	Up	8cWT-2cWT:8cKO-2cKO	8cWT-8cKO	L1Md_A:L1:LINE	2273.46	2284.46	2570.58	3583.48	2115.3	2486.75	3965.82	6096.36	5178.56	9605.27	6007.9	4564.66	7965.67	5108.96	2989.82	2700.13	3613.12	3908.51	4051.43	2868.82	2472.42	2981.5	4130.55	4405.12	1851.35	14757.4	1915.51	2543.72	3031.88	14218.3	11730	12445.5	9108.3	10315.7	13305.1	15022
L1MEg:L1:LINE	933.403	1.19583	0.267631	4.46821	7.88769e-06	5.54555e-05	L1MEg	L1	LINE	Up	8cWT-2cWT:8cKO-2cKO	NA	L1MEg:L1:LINE	321.445	558.539	87.1383	629.47	229.37	413.468	865.029	1438.24	1755.9	1514.85	2048.33	2851.24	1004.03	1684.42	404.008	555.267	349.001	603.028	597.637	548.704	1002.82	389.679	599.173	511.511	473.74	896.342	942.823	199.424	546.876	1381.88	1384.9	1478.31	1398.75	1676.44	1337.62	867.566
L1ME3E:L1:LINE	20.0428	4.4933	1.23333	3.64323	0.00026924	0.00127611	L1ME3E	L1	LINE	Up	8cWT-2cWT:8cKO-2cKO	NA	L1ME3E:L1:LINE	0	0	0	13.4887	0	0	1.10901	58.9081	0	13.4953	0	12.9015	98.3773	41.1966	1.61765	5.86175	2.19843	13.6888	1.06912	0	0	1.13279	5.65925	4.034	0.739063	1.59067	0	0	0.801872	0	9.6478	2.24599	140.578	0	23.2687	287.974
L1Md_Gf:L1:LINE	554.905	1.16673	0.406268	2.87182	0.00408113	0.0133493	L1Md_Gf	L1	LINE	Up	8cWT-2cWT:8cKO-2cKO	NA	L1Md_Gf:L1:LINE	52.1472	133.495	87.1383	642.959	29.7331	298.946	390.372	567.147	350.688	775.979	308.474	372.16	1027.17	779.834	312.206	391.671	179.722	206.773	495.537	538.784	227.698	535.808	895.576	615.991	155.203	1402.17	253.887	227.477	258.203	1885.56	806.615	708.834	928.988	1028.24	816.068	743.628
L1_Mus2:L1:LINE	3131.6	0.597392	0.221282	2.69969	0.00694035	0.0211163	L1_Mus2	L1	LINE	Up	8cWT-2cWT:8cKO-2cKO	2cWT-2cKO	L1_Mus2:L1:LINE	1998.72	1257.7	1500.02	2122.21	828.28	1206.19	2282.34	3268.15	3732.96	3657.22	3556.43	2767.87	5075.11	3506.93	2295.85	2475.26	3177.28	2230.55	2949.16	3195.12	3148.87	1329.89	3131.69	4163.49	2190.58	7251.06	2632.37	2044.25	1556.43	3872.59	4540.9	4232.79	3038.83	3864.98	5359.12	4837.23
L1_Mm:L1:LINE	1025.71	0.788509	0.308872	2.55287	0.010684	0.0304376	L1_Mm	L1	LINE	Up	8cWT-2cWT:8cKO-2cKO	NA	L1_Mm:L1:LINE	358.026	394.938	332.548	418.148	981.193	593.43	835.085	1069.75	1418.51	762.484	1049.46	976.547	1775.13	1407.65	1172.39	651.187	706.795	1151.3	764.42	329.431	333.008	679.672	656.473	1054.49	1111.55	2983.3	382.454	683.651	659.138	1454.76	1567.91	1312.56	1279.26	1436.51	1977.18	2664.67
L1Md_T:L1:LINE	26444.6	0.443223	0.186667	2.3744	0.0175775	0.0462946	L1Md_T	L1	LINE	Up	8cKO-2cKO	NA	L1Md_T:L1:LINE	16101	12793.7	16518.9	38505.6	37803.6	27876.3	25576	32563.7	31320.6	39264.5	40658.2	27133.4	42108.4	38139.9	16227.4	16949.5	24977.4	29142	20025.1	16164.1	14814.6	33191.8	22222.5	25931.3	15393.2	29355.8	16404.6	21659.1	17549.8	26143.2	29007.7	29855	26682.9	29431.9	21653.6	31914.1
RLTR6-int:ERV1:LTR	7795.6	-2.07409	0.311118	-6.66656	2.61868e-11	5.6037e-10	RLTR6-int	ERV1	LTR	Down	NA	2cWT-2cKO:8cWT-8cKO:8cWT-2cWT:8cKO-2cKO	RLTR6-int:ERV1:LTR	7250.8	5114.79	6044.55	5723.68	5084.37	3466.88	693.132	334.022	1181.11	867.072	1612.55	500.679	1218.14	923.732	10084.4	21208.3	3898.36	11982	2479.29	16858.9	17313.6	17157.2	27459.4	14308.2	18150.7	11267.5	12298.9	21929.3	14098.5	1317.31	2641.74	3731.49	2259.79	5066.61	6255.63	2682.89
RLTR6B_Mm:ERV1:LTR	1612.03	-2.57036	0.409555	-6.27598	3.47447e-10	6.08163e-09	RLTR6B_Mm	ERV1	LTR	Down	NA	2cWT-2cKO:8cWT-8cKO:8cWT-2cWT:8cKO-2cKO	RLTR6B_Mm:ERV1:LTR	1408.75	996.655	1327.52	723.891	577.672	899.812	7.76308	70.8151	304.39	114.71	47.332	103.708	617.752	110.244	1926.22	5254.79	973.354	3992.09	970.225	2828.1	3479.98	2935.05	5525.55	2740.29	4807.61	2137.06	2862.88	4731.28	2861.08	343.164	412.224	581.262	292.871	582.67	1135.85	473.881
MuRRS-int:ERV1:LTR	1022.67	-1.51357	0.381253	-3.97	7.18728e-05	0.000401938	MuRRS-int	ERV1	LTR	Down	NA	2cWT-2cKO:8cWT-8cKO:8cKO-2cKO	MuRRS-int:ERV1:LTR	447.532	270.555	279.198	292.254	25.4855	269.2	198.513	157.297	191.598	47.2335	538.606	76.4168	118.631	304.623	1346.69	1094.55	1724.12	1495.68	2026.51	2006.34	1367.13	1947.26	2751.81	2980.32	1278.58	4783.14	1184.37	1982.04	1188.37	1476.9	654.881	203.487	338.559	456.66	397.895	612.4
RMER21A:ERV1:LTR	138.329	-2.27167	0.584149	-3.88885	0.00010072	0.000539721	RMER21A	ERV1	LTR	Down	8cWT-8cKO	8cKO-2cKO	RMER21A:ERV1:LTR	61.487	68.1338	67.5766	143.879	16.9904	69.9028	110.901	129.097	14.7762	377.868	143.628	16.8712	322.62	186.835	240.221	99.6497	425.396	157.782	177.474	174.374	205.877	44.1787	100.452	217.432	157.42	874.867	85.0618	15.2465	82.5928	1.84497	80.9831	71.8717	36.316	89.7192	32.9086	0
LTR78:ERV1:LTR	66.6584	-3.34305	0.916988	-3.64568	0.000266683	0.0012656	LTR78	ERV1	LTR	Down	NA	8cKO-2cKO	LTR78:ERV1:LTR	1.55663	0	2.6675	139.383	4.24759	0	39.9244	21.3072	102.448	128.205	6.52855	16.375	13.0205	56.8629	74.0075	125.228	160.485	154.9	20.3133	177.506	0	0	190.292	69.3847	494.433	72.3754	133.761	29.2732	139.526	0.922485	22.5115	19.3155	11.7149	0	34.2383	3.64524
MER89:ERV1:LTR	1982.33	-1.62688	0.446495	-3.64367	0.000268774	0.00127455	MER89	ERV1	LTR	Down	NA	8cWT-8cKO:8cWT-2cWT:8cKO-2cKO	MER89:ERV1:LTR	924.64	713.028	1529.37	2374	2692.97	684.155	461.349	160.431	725.018	33.7382	830.758	53.591	81.0166	121.849	5264.24	1810.21	4372.12	3507.94	3651.04	5770.53	4573.88	1981.24	2440.55	3047.68	1813.66	244.168	5977.7	4329.99	4045.44	550.723	780.887	773.07	1037.94	1208.69	1978.18	1093.57
LTRIS6:ERV1:LTR	28.0659	-6.43374	1.91118	-3.36636	0.000761661	0.0031625	LTRIS6	ERV1	LTR	Down	NA	8cWT-2cWT:8cKO-2cKO	LTRIS6:ERV1:LTR	7.78316	60.6074	0	508.072	0	0	0	0	0	0	0	0	1.44673	0	14.1544	0	1.64882	12.2479	0.534559	0.522078	282.725	0	113.892	0.4034	0	33.404	0	0	0	0	0	0	0	0	0.997232	0
MER67C:ERV1:LTR	15.235	-3.57469	1.29467	-2.76109	0.00576089	0.0179831	MER67C	ERV1	LTR	Down	NA	8cKO-2cKO	MER67C:ERV1:LTR	46.699	0	0	4.49622	0	2.97459	0	0.626682	0	0	0	0	5.7869	1.7407	53.3824	4.26309	164.333	0.720463	2.6728	0	13.2824	64.5689	0	42.7604	1.47813	34.9947	9.09058	12.1972	76.9797	0	0	13.0267	0	0	0.332411	7.29047
RLTR30D_MM:ERV1:LTR	27.1883	-3.12278	1.17008	-2.66886	0.00761082	0.0228632	RLTR30D_MM	ERV1	LTR	Down	NA	8cKO-2cKO	RLTR30D_MM:ERV1:LTR	5.44822	25.3521	0.889166	0	0	2.97459	1.10901	16.9204	8.86571	6.74764	0	28.2841	0	0.580233	75.2207	162.53	0	128.243	63.6126	0	0	65.7017	16.9778	106.901	186.244	7.15801	37.0116	8.53802	0	1.84497	4.67772	1.79679	0	42.3394	0	0
RMER2:ERV1:LTR	474.213	-1.11917	0.424718	-2.6351	0.00841134	0.0248267	RMER2	ERV1	LTR	Down	NA	2cWT-2cKO:8cKO-2cKO	RMER2:ERV1:LTR	287.977	125.572	212.511	332.72	615.901	74.3647	280.58	308.954	364.479	26.9906	208.914	128.519	525.161	209.464	998.494	806.257	312.177	540.348	211.151	341.961	944.945	730.648	776.025	719.261	488.521	2986.48	316.222	563.509	367.257	159.59	149.979	326.118	370.189	131.05	453.408	575.947
MER57C2:ERV1:LTR	5.97855	-5.10673	2.01473	-2.5347	0.0112543	0.0317509	MER57C2	ERV1	LTR	Down	NA	8cKO-2cKO	MER57C2:ERV1:LTR	1.55663	0	0	0	0	0	0	0	40.3883	0	0	0.496213	0	0	42.8677	0.532886	3.29764	0	0	0	0	0	0	0.4034	63.5594	30.2227	6.49327	0	30.4711	0	0.584715	0	0	0	0.332411	0
RLTR41B:ERV1:LTR	4.01925	-5.18486	2.09926	-2.46985	0.0135171	0.0370439	RLTR41B	ERV1	LTR	Down	NA	8cKO-2cKO	RLTR41B:ERV1:LTR	0	0	0	4.49622	0	0	0	0	3.44778	0	3.26428	0	0	0	0.404412	0	0.549607	42.5073	0	0.522078	0	48.7098	0	0.4034	0	0	43.5049	0.609858	0	0	0.292358	0	0	0	0	0
MLTR14:ERV1:LTR	578.891	-1.04628	0.428453	-2.44201	0.0146059	0.0395787	MLTR14	ERV1	LTR	Down	NA	8cKO-2cKO	MLTR14:ERV1:LTR	250.618	591.021	473.925	35.9697	1138.35	263.251	931.569	410.477	711.227	421.728	461.895	251.084	512.141	306.363	547.979	551.004	720.535	519.454	685.305	1146.48	793.147	753.303	717.31	499.005	625.987	3217.92	189.603	276.266	396.926	298.885	331.826	262.332	195.638	550.412	473.353	69.2595
MMVL30-int:ERV1:LTR	2837.04	-0.738897	0.302675	-2.44122	0.0146376	0.039647	MMVL30-int	ERV1	LTR	Down	NA	8cKO-2cKO	MMVL30-int:ERV1:LTR	2226.76	1303.26	2354.51	3979.15	2034.6	1473.91	914.934	707.524	1328.38	3940.62	1292.65	487.281	1967.55	949.842	1757.98	3458.96	2903.02	5160.68	2368.63	4910.14	1745.68	3099.31	6636.18	5210.31	6245.82	5752.65	2199.92	5929.04	3250.79	2331.12	3240.78	1657.09	2921.68	2751.05	1383.16	2343.89
RLTR1B-int:ERV1:LTR	2415.17	2.60922	0.352259	7.40711	1.29085e-13	4.06018e-12	RLTR1B-int	ERV1	LTR	Up	8cWT-2cWT:8cKO-2cKO	NA	RLTR1B-int:ERV1:LTR	512.132	1012.9	956.742	1537.71	1325.25	679.693	3130.74	2683.45	2812.89	10121.5	5563.96	3449.67	4492.08	3808.65	441.214	471.604	461.12	295.39	1750.68	1021.18	373.804	636.626	1285.36	981.471	176.636	1917.55	246.744	679.992	368.861	5610.55	4945.81	4258.4	3800.3	2992.99	3811.42	2635.51
MuRRS4-int:ERV1:LTR	614.999	0.950822	0.310363	3.06358	0.00218708	0.00788665	MuRRS4-int	ERV1	LTR	Up	8cKO-2cKO	2cWT-2cKO:8cWT-8cKO	MuRRS4-int:ERV1:LTR	294.204	285.211	352.999	386.675	25.4855	351.001	515.69	360.969	232.479	472.335	564.72	322.538	828.973	423.57	436.765	864.874	357.794	645.535	352.809	277.223	294.109	703.461	755.51	890.303	654.81	1356.84	237.004	475.69	237.354	963.997	1251	1114.01	1281.6	1087.72	1231.58	871.212
MuLV-int:ERV1:LTR	2253.49	0.756336	0.305502	2.47571	0.0132971	0.0365271	MuLV-int	ERV1	LTR	Up	8cKO-2cKO	NA	MuLV-int:ERV1:LTR	1465.57	909.903	1445.78	3169.83	1805.23	1686.59	2393.25	715.044	987.542	6244.94	2640.8	836.615	1543.66	1610.73	1408.57	2125.15	1904.39	2583.58	794.89	2019.92	1704.89	2144.37	2204.28	1970.61	2123.33	4029.16	1244.11	1132.51	2031.14	3403.97	4133.06	4896.26	2248.08	4031.31	1774.07	2435.02
RLTR9B:ERVK:LTR	19.6901	-7.79116	1.50468	-5.17793	2.24356e-07	2.2243e-06	RLTR9B	ERVK	LTR	Down	8cWT-8cKO	2cWT-2cKO:8cKO-2cKO	RLTR9B:ERVK:LTR	0	0.396127	1.77833	8.99243	0	0	0	0.626682	0	0	0	0	49.1887	2.32093	87.7575	45.8282	59.3576	0	0	19.3169	0	109.88	1.41481	4.43739	127.119	14.316	5.84394	153.074	36.8861	0	0	0	0	0	0	0
RLTR44-int:ERVK:LTR	145.575	-3.27333	0.708985	-4.61692	3.89485e-06	2.92886e-05	RLTR44-int	ERVK	LTR	Down	NA	2cWT-2cKO:8cKO-2cKO	RLTR44-int:ERVK:LTR	35.0242	1.18838	12.4483	17.9849	4.24759	165.09	3.32703	13.1603	90.1348	6.74764	0	0.992425	13.0205	2.90117	159.338	205.161	212.148	30.9799	497.14	385.815	70.2068	851.856	253.959	494.971	192.896	417.55	352.585	341.521	298.296	66.4189	47.9466	90.2888	16.4008	28.2263	2.65928	3.64524
BGLII:ERVK:LTR	707.185	-1.83296	0.414768	-4.41924	9.9049e-06	6.81934e-05	BGLII	ERVK	LTR	Down	NA	8cKO-2cKO	BGLII:ERVK:LTR	768.198	355.326	368.115	355.201	577.672	1232.97	326.049	359.089	580.212	50.6073	44.0677	127.03	167.82	491.458	867.869	1086.55	1622.44	402.019	1377.03	1684.22	599.604	1193.96	931.654	1393.75	671.07	3862.14	716.208	661.087	641.497	299.808	195.003	221.455	166.351	483.879	338.726	842.05
RLTR50B:ERVK:LTR	277.75	-3.36204	0.791179	-4.2494	2.14344e-05	0.000136735	RLTR50B	ERVK	LTR	Down	NA	8cKO-2cKO	RLTR50B:ERVK:LTR	283.307	60.2113	164.496	8.99243	38.2283	232.018	2.21802	0	0.985079	3.37382	130.571	106.686	59.3157	5.80233	879.192	1394.03	277.002	628.244	126.156	937.13	193.543	943.612	1125.48	501.426	903.874	237.805	203.239	129.9	243.769	3.68994	3.50829	7.63636	41.002	3.02424	91.0805	306.2
RLTR51B_Mm:ERVK:LTR	44.537	-3.44319	0.860644	-4.00071	6.31532e-05	0.000357804	RLTR51B_Mm	ERVK	LTR	Down	NA	8cKO-2cKO	RLTR51B_Mm:ERVK:LTR	31.911	45.1585	22.2291	0	161.408	1.48729	0	23.8139	0.985079	0	53.8606	17.8637	5.7869	3.4814	10.1103	17.0524	55.5103	28.8185	179.612	154.535	0	137.067	87.7184	85.1173	92.3829	233.828	120.125	13.4169	4.00936	4.61242	18.4185	0.449198	1.17149	3.02424	16.9529	0
IAPLTR3:ERVK:LTR	17.6059	-5.181	1.32099	-3.92207	8.77902e-05	0.000480263	IAPLTR3	ERVK	LTR	Down	NA	8cKO-2cKO	IAPLTR3:ERVK:LTR	46.699	0	0	0	0	0	1.10901	0	0.985079	0	1.63214	0.992425	0	0	0.808825	7.46041	0.549607	97.2626	25.1243	18.7948	5.69244	0	8.48888	83.1003	25.8672	272.004	0	30.4929	13.6318	2.76745	0	0	0	0	0.664821	7.29047
RLTR9A3B:ERVK:LTR	7.55568	-5.21082	1.40743	-3.70236	0.000213607	0.00104301	RLTR9A3B	ERVK	LTR	Down	NA	8cKO-2cKO	RLTR9A3B:ERVK:LTR	2.33495	0	0.889166	13.4887	0	1.48729	0	0	0	0	0	0	0	0	30.7353	0	0.549607	0	0.534559	1.04416	0	112.146	1.41481	4.43739	4.43438	80.3287	8.44125	14.6366	0.801872	0	0.292358	0.898396	0	0	91.4129	0
RLTR25A:ERVK:LTR	416.517	-1.14982	0.311206	-3.69473	0.000220118	0.00107114	RLTR25A	ERVK	LTR	Down	8cWT-2cWT	2cWT-2cKO:8cKO-2cKO	RLTR25A:ERVK:LTR	25.6844	303.829	421.465	58.4508	131.675	240.942	247.309	300.181	525.54	465.587	370.495	272.421	587.37	454.323	470.736	430.039	511.135	730.55	484.311	495.974	661.272	406.671	352.288	670.853	565.383	1313.1	369.467	817.21	598.998	221.396	250.843	334.203	318.644	444.563	158.56	160.39
IAPEY5_LTR:ERVK:LTR	14.9362	-4.56203	1.24156	-3.67443	0.000238377	0.00114798	IAPEY5_LTR	ERVK	LTR	Down	NA	8cWT-2cWT:8cKO-2cKO	IAPEY5_LTR:ERVK:LTR	6.22653	0.396127	80.0249	4.49622	0	0	0	1.25336	0	0	0	0	0	0.580233	10.5147	0	28.03	1.44093	9.62207	45.4208	88.2328	46.4443	0	14.9258	2.95625	125.663	2.59731	0	76.1778	0	5.84715	0.449198	0	1.00808	0.332411	0
MurERV4_19-int:ERVK:LTR	181.085	-2.08679	0.583977	-3.57342	0.000352353	0.00161885	MurERV4_19-int	ERVK	LTR	Down	NA	8cKO-2cKO	MurERV4_19-int:ERVK:LTR	5.44822	19.0141	52.4608	22.4811	8.49518	477.421	23.2892	45.7478	286.166	94.467	62.0213	356.777	107.058	223.39	150.441	225.944	197.859	368.877	430.855	239.112	258.057	181.246	102.574	164.587	128.597	1160.39	224.018	193.325	347.21	82.1011	149.102	52.5562	19.9152	106.857	80.7758	3.64524
RMER13A:ERVK:LTR	170.179	-2.07513	0.582616	-3.56175	0.000368388	0.00168158	RMER13A	ERVK	LTR	Down	8cWT-2cWT	2cWT-2cKO:8cKO-2cKO	RMER13A:ERVK:LTR	72.3834	41.1972	2.6675	0	8.49518	58.0044	349.339	146.017	182.24	566.802	208.914	15.8788	241.603	40.0361	247.5	138.018	152.791	335.736	316.459	42.2883	106.259	271.869	150.678	341.276	189.939	1108.7	101.944	233.576	145.941	37.8219	42.0995	204.834	42.1735	56.4525	85.7619	10.9357
RLTR51A_Mm:ERVK:LTR	393.661	-1.51959	0.444171	-3.42118	0.000623506	0.00265834	RLTR51A_Mm	ERVK	LTR	Down	NA	2cWT-2cKO:8cKO-2cKO	RLTR51A_Mm:ERVK:LTR	163.446	99.4278	197.395	449.622	4.24759	38.6696	235.11	235.006	132.986	138.327	68.5498	132.985	208.328	322.03	734.413	505.709	778.793	634.728	723.794	873.436	290.315	630.962	325.407	796.311	933.437	1623.28	519.462	508.012	372.87	116.233	235.056	307.701	358.474	319.561	502.605	32.8071
ERVB7_2-LTR_MM:ERVK:LTR	96.6781	-2.5803	0.767747	-3.36088	0.000776959	0.0032174	ERVB7_2-LTR_MM	ERVK	LTR	Down	NA	8cKO-2cKO	ERVB7_2-LTR_MM:ERVK:LTR	102.738	12.2799	35.5666	0	67.9615	23.7967	59.8866	1.25336	3.44778	6.74764	1.63214	0.496213	5.7869	1.16047	263.677	218.483	418.251	35.3027	404.662	747.093	128.08	148.395	10.6111	55.6691	215.806	139.979	99.9963	4.26901	102.64	5.53491	19.0032	10.7807	69.1176	100.808	56.1774	0
RLTR44B:ERVK:LTR	18.8316	-3.52061	1.0651	-3.30543	0.000948305	0.00382243	RLTR44B	ERVK	LTR	Down	NA	8cKO-2cKO	RLTR44B:ERVK:LTR	1.55663	74.0757	10.67	13.4887	0	62.4663	1.10901	33.8408	14.7762	10.1215	1.63214	0	24.5943	30.7524	52.978	0.532886	1.09921	2.16139	3.74192	23.4935	1.89748	12.4607	14.8555	132.718	17.7375	99.4168	1.29865	32.3225	5.6131	0	14.9102	0.449198	0	0	0	0
RMER3D-int:ERVK:LTR	376.543	-1.20122	0.364729	-3.29347	0.000989584	0.00397051	RMER3D-int	ERVK	LTR	Down	NA	8cKO-2cKO	RMER3D-int:ERVK:LTR	357.247	272.931	463.255	67.4433	157.161	620.201	164.134	167.324	204.897	452.092	355.806	135.962	193.861	110.244	448.898	556.866	358.344	579.973	560.753	619.706	383.291	641.158	297.818	502.232	540.255	1728.26	446.088	264.069	359.238	39.6668	508.702	215.615	101.919	337.707	230.693	193.198
RMER17A2:ERVK:LTR	201.513	-1.60955	0.495014	-3.25152	0.00114791	0.00450367	RMER17A2	ERVK	LTR	Down	NA	8cKO-2cKO	RMER17A2:ERVK:LTR	145.545	135.079	124.483	517.065	114.685	102.623	178.551	130.35	354.136	40.4859	22.8499	84.3562	85.3568	145.639	228.897	63.4135	525.974	341.5	169.455	91.8857	93.9253	90.623	548.24	547.01	264.585	1161.98	133.761	144.536	93.819	57.1941	82.7372	206.182	126.52	60.4848	150.25	83.8405
IAP1-MM_I-int:ERVK:LTR	247.108	-2.00123	0.616503	-3.24609	0.00117	0.00457492	IAP1-MM_I-int	ERVK	LTR	Down	NA	8cWT-2cWT:8cKO-2cKO	IAP1-MM_I-int:ERVK:LTR	109.743	25.3521	36.4558	1560.19	182.646	5.94917	23.2892	87.1088	21.1792	60.7288	11.425	6.94698	2.89345	1.7407	368.824	135.353	512.783	469.022	1060.03	515.291	90.1303	190.308	691.136	290.448	307.45	816.808	112.334	439.708	180.421	147.598	63.4416	44.9198	63.2602	136.091	127.978	76.55
MYSERV6-int:ERVK:LTR	1166.39	-0.836059	0.262871	-3.18049	0.00147026	0.00559022	MYSERV6-int	ERVK	LTR	Down	NA	2cWT-2cKO:8cKO-2cKO	MYSERV6-int:ERVK:LTR	638.998	846.523	398.346	1299.41	925.975	710.926	694.241	294.541	878.198	563.428	709.98	510.107	684.301	526.272	1673.86	1737.74	2232.5	1237.04	3002.09	2156.7	1034.13	1693.52	1587.42	1788.67	1355.44	3338.02	772.699	1618.56	535.65	689.096	692.595	915.914	1043.79	1307.48	487.314	1625.78
MMERVK10D3_I-int:ERVK:LTR	245.568	-1.36821	0.450805	-3.03504	0.00240505	0.00853685	MMERVK10D3_I-int	ERVK	LTR	Down	NA	8cKO-2cKO	MMERVK10D3_I-int:ERVK:LTR	263.849	196.875	45.3475	575.516	59.4663	282.586	359.32	208.058	330.002	60.7288	368.863	51.1099	478.866	105.602	228.493	248.858	452.876	128.243	519.057	412.964	131.875	181.246	446.373	448.58	44.3438	658.537	115.58	329.933	384.898	129.148	89.4614	53.0053	249.526	113.913	233.352	43.7428
MLTR18A_MM:ERVK:LTR	11.4655	-3.26897	1.07918	-3.02913	0.00245257	0.00867396	MLTR18A_MM	ERVK	LTR	Down	8cWT-2cWT	2cWT-2cKO:8cKO-2cKO	MLTR18A_MM:ERVK:LTR	0.778316	0.396127	0.889166	0	0	0	0	31.3341	3.44778	3.37382	0	43.6667	27.4878	34.814	10.5147	0	42.3198	0.720463	7.48383	10.4416	0.94874	121.208	0.707406	20.5734	32.5188	5.56734	0	3.65915	9.62246	0.922485	1.16943	1.34759	0	0	8.31026	0
MLTR11A:ERVK:LTR	192.998	-1.94023	0.659889	-2.94024	0.00327953	0.0110963	MLTR11A	ERVK	LTR	Down	NA	8cKO-2cKO	MLTR11A:ERVK:LTR	144.767	90.3169	264.971	332.72	4.24759	17.8475	85.3939	228.739	257.106	819.839	13.0571	136.458	331.3	108.504	198.162	90.0578	173.126	334.295	132.036	210.397	214.415	72.4984	483.159	307.794	34.736	1173.91	105.191	239.065	12.0281	2.76745	66.3652	132.064	15.2293	4.03232	112.022	160.39
RLTR10D2:ERVK:LTR	12.5272	-2.58196	0.895444	-2.88344	0.00393357	0.0129189	RLTR10D2	ERVK	LTR	Down	NA	8cKO-2cKO	RLTR10D2:ERVK:LTR	7.78316	1.58451	1.77833	22.4811	21.238	38.6696	3.32703	2.50673	0.985079	3.37382	0	0.992425	1.44673	42.9373	0.808825	0	60.4568	2.88185	5.88015	69.4363	3.79496	7.92951	5.65925	3.2272	3.69532	85.8961	2.59731	31.1028	5.6131	1.84497	1.16943	2.24599	5.85743	3.02424	3.98893	7.29047
RLTR10E:ERVK:LTR	28.3378	-3.24163	1.16341	-2.7863	0.00533129	0.0168057	RLTR10E	ERVK	LTR	Down	NA	8cKO-2cKO	RLTR10E:ERVK:LTR	40.4725	0	0.889166	0	4.24759	0	46.5785	0.626682	0.49254	0	0	0	15.914	6.38257	131.434	87.9262	1.64882	0	107.446	29.2364	0	1.13279	147.141	72.2085	52.4735	221.103	3.24663	28.0535	2.40561	2.76745	4.09301	12.1283	0	18.1454	10.3047	0
MMERVK10D3_LTR:ERVK:LTR	10.0608	-2.56599	0.943962	-2.71832	0.00656151	0.0201424	MMERVK10D3_LTR	ERVK	LTR	Down	NA	8cWT-2cWT:8cKO-2cKO	MMERVK10D3_LTR:ERVK:LTR	25.6844	10.6954	0	4.49622	16.9904	4.46188	0	0.626682	0	0	0	0	2.89345	0	2.42647	17.5852	37.3733	12.2479	29.9353	27.6701	0	57.7721	42.4444	18.153	2.21719	11.93	19.4798	0.609858	3.20749	0	0	5.39037	3.51446	14.1131	0.332411	0
RLTR10-int:ERVK:LTR	12879.5	-0.913409	0.3379	-2.7032	0.00686761	0.0209214	RLTR10-int	ERVK	LTR	Down	NA	2cWT-2cKO:8cWT-8cKO:8cKO-2cKO	RLTR10-int:ERVK:LTR	3594.27	3914.13	1797	8911.5	6269.44	6103.85	1858.7	2018.54	3437.93	7064.78	3538.48	3534.03	3524.22	3171.56	15934.3	14003.7	12569	4695.26	10448.5	36173.2	13456	26703.2	25506.2	34415.6	18614	34704.4	17250	41072.1	20027.5	5205.58	5814.41	12395.6	8589.33	12567.7	5171.31	13042.7
RLTR9B2:ERVK:LTR	4.79571	-3.01032	1.12056	-2.68645	0.00722153	0.0218456	RLTR9B2	ERVK	LTR	Down	NA	8cKO-2cKO	RLTR9B2:ERVK:LTR	0.778316	0.396127	0	0	0	4.46188	0	0.626682	0.985079	0	0	0.496213	4.34018	56.8629	0.404412	36.2363	9.34332	4.32278	0	57.9506	0.94874	1.13279	1.41481	33.0788	0.739063	3.97667	0.649327	6.09858	0	0	1.16943	5.39037	0	53.4283	0.332411	0
RLTR20B4_MM:ERVK:LTR	148.19	-0.937188	0.355833	-2.63379	0.00844382	0.0249028	RLTR20B4_MM	ERVK	LTR	Down	NA	8cWT-2cWT:8cKO-2cKO	RLTR20B4_MM:ERVK:LTR	124.531	71.3028	112.035	490.088	361.045	145.755	77.6308	70.1884	128.06	77.5979	71.8141	48.1326	89.697	127.071	331.618	66.6108	257.766	100.865	217.031	157.667	84.4379	116.677	171.192	216.626	104.947	524.125	101.295	174.42	104.243	108.853	75.1359	50.7594	71.4606	140.123	90.0833	182.262
RLTR46:ERVK:LTR	5.99691	-6.18774	2.3908	-2.58814	0.00964948	0.0278488	RLTR46	ERVK	LTR	Down	NA	8cKO-2cKO	RLTR46:ERVK:LTR	0	0	0	0	0	0	0	0	0	0	0	0	0	0	1.61765	63.9463	8.79371	0	0	0	0	0	9.19628	66.9643	0	64.4221	3.89596	3.04929	0	0	0	0	0	0	0	0
RLTR26C_MM:ERVK:LTR	54.0765	-2.02131	0.787242	-2.56758	0.0102412	0.0293378	RLTR26C_MM	ERVK	LTR	Down	NA	8cKO-2cKO	RLTR26C_MM:ERVK:LTR	86.3931	11.4877	109.367	31.4735	42.4759	11.8983	9.9811	44.4944	146.777	13.4953	4.89641	0.992425	13.0205	4.64187	42.8677	120.965	3.84725	15.1297	24.5897	21.9273	6.64118	54.3738	64.374	112.145	12.5641	610.817	2.59731	202.473	6.41497	22.1396	4.38536	85.7968	8.2004	4.03232	16.9529	18.2262
RMER6BA:ERVK:LTR	119.598	-1.38963	0.549605	-2.52842	0.0114576	0.0321946	RMER6BA	ERVK	LTR	Down	8cWT-2cWT	2cWT-2cKO:8cKO-2cKO	RMER6BA:ERVK:LTR	10.1181	47.5352	72.9116	0	4.24759	1.48729	53.2325	113.429	171.896	43.8597	257.878	193.027	117.185	137.515	194.522	79.4	80.2426	134.006	119.207	72.0467	127.131	112.146	195.244	239.216	279.366	676.829	77.2699	151.855	131.507	88.5585	84.4914	26.0535	17.5723	125.002	181.829	7.29047
BGLII_Mus:ERVK:LTR	138.567	-1.45151	0.578664	-2.50838	0.0121288	0.0338074	BGLII_Mus	ERVK	LTR	Down	NA	8cKO-2cKO	BGLII_Mus:ERVK:LTR	7.00485	140.625	85.3599	184.345	72.209	263.251	49.9055	82.0953	38.4181	0	261.142	57.0645	47.7419	118.948	167.831	59.6833	46.167	2.16139	185.492	154.535	264.699	250.346	430.103	131.105	314.841	774.655	91.5551	174.42	64.9516	71.0313	71.6276	24.2567	46.8594	101.816	101.385	149.455
RLTR21:ERVK:LTR	198.809	-1.31812	0.527966	-2.4966	0.0125389	0.0347579	RLTR21	ERVK	LTR	Down	NA	8cKO-2cKO	RLTR21:ERVK:LTR	282.529	40.8011	322.767	53.9546	12.7428	60.979	32.1613	216.205	181.747	53.9811	29.3785	70.9584	180.841	120.108	380.148	426.842	284.147	167.868	349.602	256.34	36.0521	191.441	298.525	267.454	314.841	1037.12	342.195	257.97	93.0171	123.613	304.929	170.695	9.37188	224.802	118.338	25.5167
RLTR10D:ERVK:LTR	39.1821	-2.13164	0.855163	-2.49267	0.0126788	0.0350952	RLTR10D	ERVK	LTR	Down	NA	8cKO-2cKO	RLTR10D:ERVK:LTR	15.5663	7.13028	0.889166	35.9697	63.7139	8.92376	12.1991	1.25336	8.37318	16.8691	0	2.97728	7.23363	34.814	10.1103	26.6443	35.1749	8.64556	86.0641	55.3402	1.89748	99.6853	161.996	118.599	124.902	356.31	2.59731	15.8563	0.801872	0.922485	3.80065	68.2781	0	4.03232	44.8754	7.29047
RLTR44D:ERVK:LTR	27.6595	-2.25661	0.919284	-2.45474	0.0140985	0.0383851	RLTR44D	ERVK	LTR	Down	NA	2cWT-2cKO:8cKO-2cKO	RLTR44D:ERVK:LTR	7.00485	0	9.78082	0	0	1.48729	24.3982	0	2.95524	0	3.26428	20.8409	0	0	64.3016	59.1504	45.0678	0.720463	28.3317	95.5402	58.8219	46.4443	150.678	55.6691	8.1297	159.067	0	85.99	1.60374	0.922485	23.0963	6.73797	35.1446	1.00808	15.6233	3.64524
RMER6B:ERVK:LTR	432.33	-0.91123	0.380512	-2.39475	0.0166317	0.0442175	RMER6B	ERVK	LTR	Down	8cWT-2cWT	2cWT-2cKO:8cKO-2cKO	RMER6B:ERVK:LTR	182.126	300.66	118.259	17.9849	267.598	227.556	316.068	413.61	490.57	576.923	179.535	400.444	808.719	373.67	402.795	588.306	261.063	646.256	744.107	1034.24	462.037	417.998	504.381	419.536	373.227	1949.36	378.558	340.911	314.334	343.164	411.64	254.246	283.499	646.18	361.663	153.1
RLTR45-int:ERVK:LTR	49741.7	6.39934	0.27286	23.4528	1.23775e-121	2.30085e-117	RLTR45-int	ERVK	LTR	Up	2cWT-2cKO:8cWT-2cWT:8cKO-2cKO	NA	RLTR45-int:ERVK:LTR	6716.87	6915.58	5883.61	4774.98	1720.27	4212.01	85087.8	61686.2	42154.5	108694	98628.5	111615	68538.6	87408.7	1139.63	962.393	1036.01	1357.35	1234.83	486.577	2646.99	1587.03	992.491	1349.37	2961.43	2677.09	1416.83	2901.71	2165.86	120108	211620	194428	98084.9	130370	159306	120996
RLTR13B1:ERVK:LTR	2397.46	5.53132	0.398293	13.8876	7.5364e-44	7.0047e-41	RLTR13B1	ERVK	LTR	Up	2cWT-2cKO:8cWT-2cWT:8cKO-2cKO	NA	RLTR13B1:ERVK:LTR	780.651	291.945	433.024	827.304	42.4759	184.424	5097.02	2961.07	1902.68	3842.78	3166.35	5096.6	4487.74	3962.41	93.0148	156.136	35.7245	149.856	178.543	142.005	91.0791	139.333	88.4258	94.7989	204.721	611.612	29.2197	84.7703	69.7628	5318.12	9396.96	10610.5	4364.95	5811.58	7866.16	4972.1
RLTR45:ERVK:LTR	3512.2	4.06644	0.339046	11.9938	3.82995e-33	1.54772e-30	RLTR45	ERVK	LTR	Up	8cWT-2cWT:8cKO-2cKO	NA	RLTR45:ERVK:LTR	574.398	649.252	950.518	1393.83	135.923	429.828	3612.05	3024.37	2313.46	8326.59	5160.82	4796.89	7590.97	7244.22	623.604	340.514	406.16	635.449	181.216	605.088	282.725	788.42	481.036	490.13	253.499	1828.47	476.606	681.822	356.031	6282.12	10189	18315.1	9252.39	6866.04	6930.43	8398.63
ERVB4_2-I_MM-int:ERVK:LTR	2422.41	4.45051	0.442605	10.0553	8.70853e-24	1.15631e-21	ERVB4_2-I_MM-int	ERVK	LTR	Up	8cWT-2cWT:8cKO-2cKO	NA	ERVB4_2-I_MM-int:ERVK:LTR	549.491	300.264	448.14	2252.6	80.7042	240.942	1811.02	1574.23	1354.98	2375.17	4995.98	4372.13	3456.23	2717.81	202.206	131.623	116.517	262.969	279.575	87.7091	282.725	252.612	72.1554	212.995	441.96	1427.62	382.454	650.719	181.223	6495.22	8163.21	10082.7	5468.49	5064.6	8156.02	8343.95
ETnERV2-int:ERVK:LTR	829.765	3.14367	0.317645	9.89678	4.29899e-23	5.15574e-21	ETnERV2-int	ERVK	LTR	Up	2cWT-2cKO:8cKO-2cKO	8cWT-8cKO	ETnERV2-int:ERVK:LTR	578.289	728.477	539.724	1146.54	182.646	614.252	967.058	806.54	485.644	1163.97	305.21	699.164	1297.71	1026.43	182.39	84.7289	224.789	95.1012	314.321	322.122	227.698	356.828	38.9073	173.462	178.853	426.299	258.432	404.946	242.967	2328.35	2722.73	2974.59	1487.79	2240.96	1996.13	1377.9
ETnERV3-int:ERVK:LTR	1469.65	4.06504	0.456752	8.89987	5.59141e-19	3.77959e-17	ETnERV3-int	ERVK	LTR	Up	8cWT-2cWT:8cKO-2cKO	2cWT-2cKO:8cWT-8cKO	ETnERV3-int:ERVK:LTR	123.752	30.1056	22.2291	49.4584	33.9807	35.695	916.043	707.524	376.793	4224.02	4095.03	679.811	545.415	1225.45	262.059	216.885	292.391	227.666	220.238	125.299	256.16	108.748	122.381	261.403	461.915	1041.89	73.3739	74.4027	416.973	3665.95	3926.95	3951.14	2697.93	5759.16	8327.22	965.988
MMERVK10C-int:ERVK:LTR	12106.6	2.32666	0.283674	8.20189	2.36632e-16	1.12788e-14	MMERVK10C-int	ERVK	LTR	Up	8cWT-2cWT:8cKO-2cKO	8cWT-8cKO	MMERVK10C-int:ERVK:LTR	3540.56	1926.76	3133.42	6919.68	3784.6	3200.66	10298.3	7366.65	5942.98	27739.6	8878.83	7143.97	7240.86	6344.27	5144.12	4649.43	5705.47	6267.31	8498.96	5558.04	6568.13	4848.33	5841.05	5926.75	4323.52	16522.3	3266.76	6857.86	3743.14	17616.7	34330.4	26724.1	20858.3	38223.4	37321.1	22421.9
RLTR10C:ERVK:LTR	1219.53	2.46777	0.333616	7.39704	1.39257e-13	4.34336e-12	RLTR10C	ERVK	LTR	Up	8cWT-2cWT:8cKO-2cKO	8cWT-8cKO	RLTR10C:ERVK:LTR	396.941	266.989	264.082	548.538	407.769	176.988	703.113	951.93	900.363	3846.16	520.652	613.319	1205.12	688.157	386.214	527.557	269.308	312.681	921.581	893.275	495.242	370.421	615.444	789.856	413.136	1284.46	214.927	678.163	335.182	2706.57	3369.13	2410.84	2068.84	2397.22	3667.82	2092.37
ERVB4_2-LTR_MM:ERVK:LTR	1364.92	2.82481	0.409299	6.90158	5.14274e-12	1.25787e-10	ERVB4_2-LTR_MM	ERVK	LTR	Up	8cWT-2cWT:8cKO-2cKO	NA	ERVB4_2-LTR_MM:ERVK:LTR	521.472	178.257	232.072	319.231	12.7428	139.806	2184.75	1509.68	1133.33	2753.04	2684.87	2531.68	1673.86	1748.82	306.949	533.419	418.251	110.231	1400.55	971.065	296.007	274.135	742.777	557.902	416.832	234.624	81.8152	301.88	230.939	2232.41	3440.17	3991.12	2642.87	3323.64	4099.62	776.436
RLTR13C2:ERVK:LTR	176.483	2.87974	0.506143	5.68957	1.27358e-08	1.62266e-07	RLTR13C2	ERVK	LTR	Up	8cWT-2cWT:8cKO-2cKO	NA	RLTR13C2:ERVK:LTR	1.55663	30.1056	56.0174	13.4887	191.142	194.835	102.029	315.221	423.584	485.83	22.8499	206.424	283.558	186.835	12.5368	47.9598	36.8237	29.539	7.48383	53.774	37.9496	27.1869	73.5703	44.7773	114.555	62.0361	43.5049	47.569	176.412	176.195	325.686	619.444	333.873	354.844	362.66	645.207
MMERVK9C_I-int:ERVK:LTR	981.161	1.80423	0.386962	4.66255	3.12318e-06	2.40401e-05	MMERVK9C_I-int	ERVK	LTR	Up	8cWT-2cWT:8cKO-2cKO	NA	MMERVK9C_I-int:ERVK:LTR	315.996	395.335	374.339	274.269	131.675	193.348	1197.73	877.982	570.361	2317.82	765.473	1025.18	645.239	895.3	428.273	302.679	618.858	496.399	648.421	1306.24	94.874	427.061	500.136	629.303	194.374	2696.98	214.927	275.656	358.437	2041.46	1681.35	2286.42	1857.98	3007.1	1647.43	1370.61
RLTR31D_MM:ERVK:LTR	1887.51	1.36274	0.293892	4.63687	3.53727e-06	2.69816e-05	RLTR31D_MM	ERVK	LTR	Up	8cWT-2cWT:8cKO-2cKO	NA	RLTR31D_MM:ERVK:LTR	600.86	784.727	642.867	1829.96	836.775	1624.12	5355.41	2048.62	2084.43	3542.51	4344.75	2550.04	3761.49	1894.46	710.957	715.133	1036.56	524.497	1152.51	874.48	793.147	828.067	394.025	1567.21	1130.77	3231.44	575.304	1099.57	1357.57	4449.14	2412.54	2122.91	2118.04	2510.12	1901.06	2675.6
RLTR13B2:ERVK:LTR	210.501	3.75361	0.819528	4.58021	4.64516e-06	3.43745e-05	RLTR13B2	ERVK	LTR	Up	8cKO-2cKO	NA	RLTR13B2:ERVK:LTR	1.55663	23.3715	3.55666	355.201	0	2.97459	146.389	38.8543	71.9108	37.112	523.916	293.758	137.439	55.1222	17.3897	35.7034	12.0914	3.60232	0.534559	6.26493	1.89748	26.0541	5.65925	111.338	8.86876	353.128	88.9578	70.7436	2.40561	595.925	508.995	686.824	808.325	855.86	1201.66	368.169
RLTR9E:ERVK:LTR	296.129	2.04306	0.459115	4.44999	8.58726e-06	5.98308e-05	RLTR9E	ERVK	LTR	Up	8cKO-2cKO	NA	RLTR9E:ERVK:LTR	107.408	226.585	523.719	696.914	509.711	71.3901	273.926	197.405	196.031	259.784	89.7676	483.311	471.632	309.264	65.5148	28.7759	207.202	12.2479	84.4604	136.784	20.8723	116.677	232.737	190.405	214.328	427.89	101.295	90.259	119.479	542.421	632.37	1056.96	284.671	919.369	642.55	149.455
RLTR20B3A_MM:ERVK:LTR	107.87	2.71726	0.646402	4.20367	2.6262e-05	0.00016393	RLTR20B3A_MM	ERVK	LTR	Up	8cKO-2cKO	8cWT-8cKO	RLTR20B3A_MM:ERVK:LTR	23.3495	91.1092	58.6849	4.49622	271.846	185.912	4.43604	68.935	180.27	16.8691	22.8499	86.341	21.7009	30.1721	72.7942	4.79598	39.0221	7.20463	111.723	10.9636	8.53866	47.5771	73.5703	54.4589	2.21719	99.4168	32.4663	23.1746	56.131	104.241	196.757	103.765	28.1156	64.5171	90.0833	743.628
RLTR40:ERVK:LTR	1149.48	1.49603	0.386022	3.87552	0.000106399	0.000565583	RLTR40	ERVK	LTR	Up	8cWT-2cWT:8cKO-2cKO	NA	RLTR40:ERVK:LTR	335.454	1005.37	519.273	1767.01	280.341	147.242	3312.62	1759.1	1053.54	2358.3	2340.49	1560.09	1229.72	655.664	1034.49	310.14	948.622	365.995	1272.79	837.935	287.468	538.074	202.318	733.784	436.786	1750.53	333.105	398.847	213.298	3190.87	1924.3	1569.05	1313.23	1657.28	1312.36	1461.74
ERVB2_1A-I_MM-int:ERVK:LTR	93.0135	2.71067	0.719514	3.76736	0.000164983	0.000827987	ERVB2_1A-I_MM-int	ERVK	LTR	Up	8cWT-2cWT:8cKO-2cKO	2cWT-2cKO:8cWT-8cKO	ERVB2_1A-I_MM-int:ERVK:LTR	17.9013	1.98063	1.77833	4.49622	0	0	4.43604	70.1884	91.6124	43.8597	78.3426	48.6288	10.1271	97.4792	20.2206	162.53	112.12	10.0865	1.60368	28.7143	0.94874	37.382	0.707406	62.9303	77.6017	87.4867	3.89596	54.8873	0	83.0236	250.55	379.572	234.297	390.127	282.549	513.978
MMETn-int:ERVK:LTR	1679.29	1.25997	0.384247	3.27905	0.00104158	0.00415313	MMETn-int	ERVK	LTR	Up	8cWT-2cWT:8cKO-2cKO	NA	MMETn-int:ERVK:LTR	439.749	1261.27	871.383	2468.42	38.2283	1390.62	4868.56	2088.73	1763.29	5796.22	843.815	1214.73	2324.89	2728.84	727.538	1039.66	1190.45	804.758	904.475	834.802	839.635	777.092	1229.47	690.217	307.45	2718.45	1287.62	922.106	671.166	2777.6	2740.27	1348.94	2330.08	3214.77	1610.53	2722.99
RLTR10B2:ERVK:LTR	188.169	1.69048	0.55342	3.0546	0.00225363	0.00808429	RLTR10B2	ERVK	LTR	Up	8cKO-2cKO	8cWT-8cKO	RLTR10B2:ERVK:LTR	59.1521	61.3996	102.254	4.49622	0	227.556	364.865	50.1346	125.598	6.74764	42.4356	92.7918	17.3607	162.465	47.3162	145.478	86.2883	71.3259	106.377	210.919	86.3354	345.5	114.6	243.25	48.0391	156.681	10.3892	309.808	94.6208	626.367	410.762	461.326	159.322	602.832	733.298	382.75
MYSERV16_I-int:ERVK:LTR	633.62	1.44108	0.475292	3.03199	0.00242949	0.00860891	MYSERV16_I-int	ERVK	LTR	Up	8cKO-2cKO	8cWT-8cKO	MYSERV16_I-int:ERVK:LTR	466.99	167.562	39.1233	224.811	80.7042	502.705	225.129	302.687	649.66	151.822	91.3997	364.716	708.895	293.018	215.956	193.971	665.025	323.488	192.441	493.364	876.636	428.194	394.733	624.462	417.571	1729.85	379.856	562.289	328.767	377.296	360.769	4406.63	705.234	402.224	456.4	1337.8
RMER6D:ERVK:LTR	614.675	1.23432	0.436369	2.82863	0.00467484	0.0149906	RMER6D	ERVK	LTR	Up	8cWT-2cWT:8cKO-2cKO	NA	RMER6D:ERVK:LTR	302.765	99.4278	106.7	332.72	373.788	72.8774	364.865	559	434.913	1470.99	772.001	724.967	1077.81	706.144	211.912	246.193	117.066	711.097	68.4236	536.696	505.679	449.717	233.444	389.684	208.416	2188.76	207.135	182.958	550.886	1356.98	1206.27	692.214	357.303	2236.93	1046.43	754.564
IAPEY4_I-int:ERVK:LTR	487.345	1.3317	0.526277	2.53041	0.0113929	0.032064	IAPEY4_I-int	ERVK	LTR	Up	8cWT-2cWT:8cKO-2cKO	2cWT-2cKO	IAPEY4_I-int:ERVK:LTR	181.348	202.025	22.2291	8.99243	25.4855	13.3856	94.2659	163.564	277.792	1390.01	22.8499	330.478	160.586	214.106	279.449	421.513	126.41	254.324	406.265	374.852	323.52	480.302	218.589	191.211	677.721	1451.48	125.969	808.062	232.543	1526.71	690.549	1105.93	320.987	987.919	1947.59	776.436
MT2_Mm:ERVL:LTR	42795.3	-2.65849	0.255107	-10.4211	1.98712e-25	3.38885e-23	MT2_Mm	ERVL	LTR	Down	NA	2cWT-2cKO:8cWT-8cKO:8cWT-2cWT:8cKO-2cKO	MT2_Mm:ERVL:LTR	12371.3	14598.5	25584.9	26635.6	42841.2	22452.2	2291.22	1081.03	1961.79	3036.44	1723.54	2221.54	2945.53	2392.88	58038.4	81186.3	103028	77745.9	109641	132967	74224.7	61736.9	118769	110321	97151.4	108694	36100	80738.5	60205.3	6228.62	6196.81	8165.52	15325.4	22271.5	12857.3	17387.8
MERVL-int:ERVL:LTR	403401	-2.35517	0.288243	-8.17078	3.06403e-16	1.43831e-14	MERVL-int	ERVL	LTR	Down	NA	2cWT-2cKO:8cWT-8cKO:8cWT-2cWT:8cKO-2cKO	MERVL-int:ERVL:LTR	104936	156055	256226	273015	400552	222883	29474.2	12360.7	10580.7	19480.4	16953	14995.5	31761.4	14662.5	503832	828850	932639	628298	1.05704e+06	1.22335e+06	702380	606772	1.2245e+06	895008	999523	778913	334840	805605	578983	61990.1	59870.7	83712.1	183280	220971	104990	189709
MERVL_2A-int:ERVL:LTR	18298.5	-2.17253	0.275308	-7.8913	2.99052e-15	1.19038e-13	MERVL_2A-int	ERVL	LTR	Down	NA	2cWT-2cKO:8cWT-8cKO:8cWT-2cWT:8cKO-2cKO	MERVL_2A-int:ERVL:LTR	4588.95	7369.54	12782.6	13335.8	20940.6	9597.5	2279.02	1071.63	1357.93	1450.74	2534.71	1595.82	1821.43	1503.97	21239.7	36486.7	39574.5	29100.2	44899.8	55770.4	29245.9	27577.7	54043	40338.3	42342.4	36468.5	15285.8	31463.8	28006.2	3812.63	3134.66	4000.56	9089.55	11196.7	5096.85	9484.91
MER73:ERVL:LTR	15.0378	-6.5668	1.44217	-4.5534	5.27849e-06	3.86306e-05	MER73	ERVL	LTR	Down	NA	8cKO-2cKO	MER73:ERVL:LTR	0	48.7236	0	0	0	10.4111	0	0	0.49254	0	0	0	11.5738	0.580233	11.3235	0	101.128	56.9166	14.9677	5.74286	0	103.084	2.12222	32.6754	0.739063	97.0308	0.649327	16.4662	40.8954	0	0.877073	0	0	0	0	0
ERV3-16A3_LTR:ERVL:LTR	12.4584	-6.29281	1.5834	-3.97424	7.06043e-05	0.00039532	ERV3-16A3_LTR	ERVL	LTR	Down	NA	8cKO-2cKO	ERV3-16A3_LTR:ERVL:LTR	0	79.6215	0	0	4.24759	0	0	0	1.97016	0	0	0	4.34018	0	42.8677	0.532886	16.4882	229.107	28.8662	0	2.84622	1.13279	0.707406	27.0278	6.65157	9.54401	0	4.26901	0	0	0.292358	0.449198	0	0	0	0
LTR40b:ERVL:LTR	19.9506	-5.0124	1.32323	-3.788	0.000151865	0.000770683	LTR40b	ERVL	LTR	Down	NA	8cKO-2cKO	LTR40b:ERVL:LTR	0	40.8011	0	0	0	0	0	0.626682	0	3.37382	0	20.3447	5.7869	75.4304	71.581	22.9141	15.9386	0	0.534559	1.56623	0	27.1869	142.896	49.6181	45.0829	120.095	77.2699	0.609858	8.82059	2.76745	0	2.24599	0	2.01616	0.664821	0
MT2C_Mm:ERVL:LTR	5165.79	-0.709371	0.196088	-3.61761	0.00029734	0.0013919	MT2C_Mm	ERVL	LTR	Down	NA	8cWT-2cWT:8cKO-2cKO	MT2C_Mm:ERVL:LTR	4317.32	3509.29	5362.56	11042.7	4506.69	3081.67	3528.87	3121.5	4421.53	1825.24	2529.81	3787.59	2670.65	3036.94	7468.28	4594.54	7602.72	6285.32	7016.09	7104.43	8248.35	3206.92	7017.47	7360.83	8908.67	5005.83	7765.95	5925.38	7802.21	3068.18	3263.88	3554.95	3823.73	4318.62	4426.38	5136.14
ERVL-B4-int:ERVL:LTR	702.186	-1.59706	0.460458	-3.46842	0.000523527	0.00228738	ERVL-B4-int	ERVL	LTR	Down	NA	2cWT-2cKO:8cKO-2cKO	ERVL-B4-int:ERVL:LTR	74.7184	188.16	270.306	58.4508	310.074	269.2	263.945	364.102	82.7467	148.448	16.3214	184.591	157.693	128.232	814.486	1032.73	2253.94	1600.15	1877.37	2231.36	969.613	266.205	1548.51	2050.48	1130.77	1167.55	516.215	886.734	1565.25	125.458	38.0065	184.62	379.561	191.535	302.826	575.947
MT2B2:ERVL:LTR	2326.8	-0.6399	0.198648	-3.22127	0.00127624	0.00493427	MT2B2	ERVL	LTR	Down	NA	2cWT-2cKO:8cWT-8cKO:8cWT-2cWT:8cKO-2cKO	MT2B2:ERVL:LTR	978.344	1262.85	2420.31	1731.04	1287.02	1180.91	802.924	778.966	870.81	435.223	1481.98	917.001	933.138	838.437	4077.29	3199.98	3168.49	2521.62	5180.95	5804.46	3468.59	2145.5	2304.73	4769.39	2774.44	3886	3053.78	2505.3	3403.14	2126.33	1721.69	2212.75	1575.65	2864.96	1928.98	2974.51
MER74B:ERVL:LTR	18.8936	-4.47692	1.53282	-2.92071	0.0034924	0.0116868	MER74B	ERVL	LTR	Down	8cWT-2cWT	2cWT-2cKO:8cKO-2cKO	MER74B:ERVL:LTR	0.778316	0	0	0	0	0	6.65407	1.25336	0	0	0	0.496213	183.734	0	46.5074	0	44.5182	0	18.7096	0	74.9505	94.0213	3.53703	27.8346	0	159.862	0	0.609858	25.6599	0	0.877073	4.04278	4.68594	0	0.332411	0
MLT2B4:ERVL:LTR	81.701	-2.31921	0.795427	-2.91568	0.00354919	0.0118534	MLT2B4	ERVL	LTR	Down	NA	8cKO-2cKO	MLT2B4:ERVL:LTR	98.8462	5.9419	55.1283	8.99243	4.24759	117.496	4.43604	35.0942	59.5973	0	4.89641	0.992425	56.4223	93.9978	146.802	61.8148	90.6852	38.905	314.321	36.0234	361.47	120.075	237.689	74.2255	81.297	509.014	111.035	18.9056	41.6973	22.1396	17.5415	89.8396	0	0	99.7232	3.64524
MT2B1:ERVL:LTR	2095.37	-0.693575	0.248683	-2.78899	0.00528722	0.0166894	MT2B1	ERVL	LTR	Down	NA	2cWT-2cKO:8cKO-2cKO	MT2B1:ERVL:LTR	2043.08	1373.37	605.522	1704.07	1478.16	1041.11	1163.35	1347.37	1767.73	1518.22	448.838	1297.6	843.441	1453.48	3941	2808.31	4123.7	2187.33	3587.43	5421.78	1924.99	1747.89	2282.09	3102.55	2456.65	4303.55	2246.02	2445.53	2115.34	1770.25	1594.52	1919.42	577.542	2465.76	2351.14	1749.71
MER76:ERVL:LTR	4.28518	-4.43572	1.60935	-2.75621	0.00584752	0.0182046	MER76	ERVL	LTR	Down	NA	8cKO-2cKO	MER76:ERVL:LTR	0	0	0	4.49622	0	1.48729	0	8.14687	0	0	0	0	17.3607	2.90117	65.5148	0	1.09921	0	0.534559	2.08831	89.1816	2.26557	0.707406	46.3909	1.47813	1.59067	0.649327	0.609858	0	0	0	0.898396	0	0	0.332411	0
MLT2F:ERVL:LTR	35.6361	-2.49847	0.908081	-2.75137	0.00593472	0.0184328	MLT2F	ERVL	LTR	Down	NA	2cWT-2cKO:8cKO-2cKO	MLT2F:ERVL:LTR	1.55663	0	2.6675	17.9849	0	1.48729	0	23.8139	22.1643	67.4764	0	8.93183	0	4.06163	85.331	31.9732	37.3733	62.6803	51.8523	35.5013	22.7698	5.66394	41.0296	135.139	0	334.04	9.7399	60.9858	156.365	68.2639	2.33886	9.43316	1.17149	12.097	0.997232	3.64524
LTR33A_:ERVL:LTR	11.5389	-3.00834	1.13579	-2.64867	0.00808095	0.0240116	LTR33A_	ERVL	LTR	Down	NA	2cWT-2cKO:8cKO-2cKO	LTR33A_:ERVL:LTR	1.55663	0.792254	0	0	0	1.48729	0	6.8935	43.3435	0	0	2.48106	10.1271	0.580233	8.49266	0	48.3654	1.44093	20.3133	38.6338	8.53866	65.7017	0	0.806799	1.47813	140.774	2.59731	1.21972	0.801872	0	1.46179	0.449198	3.51446	12.097	2.99169	0
ERVL-int:ERVL:LTR	84.3672	-1.68948	0.642129	-2.63105	0.00851209	0.0250683	ERVL-int	ERVL	LTR	Down	NA	8cWT-8cKO:8cWT-2cWT:8cKO-2cKO	ERVL-int:ERVL:LTR	53.7038	36.8398	30.2316	89.9243	33.9807	60.979	0	0.626682	36.9405	0	0	0	7.23363	17.407	89.3751	95.9195	153.89	136.168	214.893	180.639	424.087	74.764	258.203	270.278	117.511	89.0774	14.2852	101.236	140.328	4.61242	16.9567	26.5027	171.037	44.3555	46.2051	3.64524
LTR16A:ERVL:LTR	64.3196	-2.27894	0.912005	-2.49882	0.0124607	0.0345668	LTR16A	ERVL	LTR	Down	NA	8cKO-2cKO	LTR16A:ERVL:LTR	7.00485	57.0423	104.922	4.49622	12.7428	1.48729	80.9578	1.88005	189.628	3.37382	3.26428	65.0039	36.1681	75.4304	200.184	10.6577	135.203	72.0463	85.5295	0.522078	3.79496	192.574	55.8851	66.5609	2.95625	534.465	0	170.151	38.4898	0.922485	100.863	27.4011	4.68594	28.2263	1.66205	3.64524
MT2B:ERVL:LTR	2177.06	-0.390208	0.161642	-2.41402	0.0157774	0.0423152	MT2B	ERVL	LTR	Down	NA	2cWT-2cKO:8cKO-2cKO	MT2B:ERVL:LTR	1488.92	1578.57	1500.91	1677.09	2191.76	1386.16	1502.71	1787.3	1788.41	1754.39	2069.55	1357.64	2401.56	1680.94	2443.86	2201.89	2624.92	2324.22	2759.4	2892.83	2054.97	2513.65	3335.42	2694.71	2522.42	5874.34	1878.5	1713.7	2222.79	2170.61	2058.78	2109.43	1624.85	1902.25	1652.75	2376.69
MTA_Mm:ERVL-MaLR:LTR	168459	-3.30477	0.289973	-11.3968	4.33759e-30	1.20345e-27	MTA_Mm	ERVL-MaLR	LTR	Down	NA	2cWT-2cKO:8cWT-8cKO:8cWT-2cWT:8cKO-2cKO	MTA_Mm:ERVL-MaLR:LTR	65748.3	61861.5	57435.7	186449	102439	105763	7582.31	7998.34	7274.81	10118.1	6301.69	3593.08	8746.9	5929.99	334746	334308	500483	398411	353454	508676	237632	402052	279745	348279	295186	624711	222398	249880	219155	22629.5	11501.6	26419.6	34781.4	26675.8	13502.5	54015.1
MTA_Mm-int:ERVL-MaLR:LTR	999114	-3.09625	0.318166	-9.73155	2.21192e-22	2.36307e-20	MTA_Mm-int	ERVL-MaLR	LTR	Down	NA	2cWT-2cKO:8cWT-8cKO:8cWT-2cWT:8cKO-2cKO	MTA_Mm-int:ERVL-MaLR:LTR	366227	332357	307201	1.08899e+06	593499	575733	38381.8	32595.6	33883.8	40475.7	23638.3	14761.3	33051.9	23492.5	2.03485e+06	2.07557e+06	2.95762e+06	1.51521e+06	2.0566e+06	3.23781e+06	1.6179e+06	2.29061e+06	1.75567e+06	1.94608e+06	1.90203e+06	3.82987e+06	1.32931e+06	1.58978e+06	1.3596e+06	157423	58623.8	149121	215005	183965	69774.6	429088
MT-int:ERVL-MaLR:LTR	37586.6	-2.88151	0.318593	-9.0445	1.50352e-19	1.08751e-17	MT-int	ERVL-MaLR	LTR	Down	NA	2cWT-2cKO:8cWT-8cKO:8cWT-2cWT:8cKO-2cKO	MT-int:ERVL-MaLR:LTR	16382.8	15754.4	16474.5	46846.1	32358.1	26351.9	1950.75	1497.14	1460.87	1761.13	1150.66	659.963	2008.05	1683.26	78125.6	74433	96722.6	58419.5	72916.6	120193	70280.8	74087.7	72295.5	63004.6	69376.6	136502	43819.2	60852.3	50643.8	6067.18	2628.88	5485.6	9394.14	7283.38	2918.9	18831.3
MTB-int:ERVL-MaLR:LTR	4016.67	-2.75211	0.317602	-8.6653	4.5032e-18	2.7627e-16	MTB-int	ERVL-MaLR	LTR	Down	NA	2cWT-2cKO:8cWT-8cKO:8cWT-2cWT:8cKO-2cKO	MTB-int:ERVL-MaLR:LTR	1654.7	1639.96	1484.02	5094.21	1979.38	1930.51	268.381	378.516	561.988	728.745	582.673	159.284	114.291	327.252	7152.03	7452.41	14492	5338.63	7367.83	11468.5	7046.29	8601.25	8107.58	6728.3	7870.29	13528.6	4617.36	7070.7	5164.05	827.469	548.755	623.936	1068.39	1281.27	517.231	1921.04
MTB:ERVL-MaLR:LTR	2225.24	-1.65718	0.267129	-6.20368	5.51593e-10	9.31296e-09	MTB	ERVL-MaLR	LTR	Down	NA	2cWT-2cKO:8cWT-2cWT:8cKO-2cKO	MTB:ERVL-MaLR:LTR	1183.82	964.965	818.033	2607.81	1333.74	1430.78	303.869	513.253	1222.48	725.372	739.359	848.028	568.563	734.576	3061.81	3002.81	5078.92	4010.1	4012.4	5567.44	3125.15	4305.72	2873.48	3995.27	3389.34	8592.79	2333.03	2309.53	2748.01	866.213	922.973	1250.57	654.86	1057.48	817.065	1381.54
MTB_Mm-int:ERVL-MaLR:LTR	779.412	-1.58026	0.303738	-5.2027	1.96413e-07	1.97571e-06	MTB_Mm-int	ERVL-MaLR	LTR	Down	NA	8cWT-8cKO:8cWT-2cWT:8cKO-2cKO	MTB_Mm-int:ERVL-MaLR:LTR	505.127	464.261	921.176	687.921	1036.41	608.303	238.437	88.3622	276.315	468.961	24.4821	78.4016	228.583	84.7141	1330.92	1053.52	1424.58	1105.91	2476.08	1816.31	982.895	1344.62	986.124	920.961	1337.7	1726.67	1012.95	1145.31	945.407	480.615	250.843	264.128	477.966	461.701	422.494	481.171
MTB_Mm:ERVL-MaLR:LTR	577.246	-1.42403	0.317313	-4.48777	7.1972e-06	5.12797e-05	MTB_Mm	ERVL-MaLR	LTR	Down	NA	2cWT-2cKO:8cKO-2cKO	MTB_Mm:ERVL-MaLR:LTR	244.391	185.783	379.674	328.224	101.942	417.929	531.216	323.995	646.212	475.709	283.992	259.519	542.522	132.873	909.119	765.225	1165.72	797.553	850.484	791.47	570.193	942.479	495.184	1215.85	802.623	2661.98	647.379	792.816	357.635	121.768	365.155	455.037	406.505	130.042	382.272	590.528
MLT1H-int:ERVL-MaLR:LTR	27.6585	-4.75365	1.22355	-3.88512	0.000102278	0.00054712	MLT1H-int	ERVL-MaLR	LTR	Down	NA	8cKO-2cKO	MLT1H-int:ERVL-MaLR:LTR	17.9013	44.7623	17.7833	4.49622	0	31.2332	37.7064	3.76009	1.47762	0	1.63214	0.496213	4.34018	8.7035	29.1177	0.532886	0	0	87.1332	77.2675	1.89748	2.26557	166.24	72.2085	45.0829	351.538	1.94798	0	0	0.922485	0	4.94118	0	0	7.97785	0
ORR1G-int:ERVL-MaLR:LTR	32.4944	-4.90208	1.26179	-3.88501	0.000102326	0.000547222	ORR1G-int	ERVL-MaLR	LTR	Down	NA	8cKO-2cKO	ORR1G-int:ERVL-MaLR:LTR	1.55663	8.71479	0.889166	0	101.942	0	0	5.01346	0	0	1.63214	5.45834	14.4673	0	1.61765	44.7624	43.419	2.16139	209.547	292.364	110.054	0	181.096	104.077	15.5203	0	30.5184	11.5873	0	0.922485	13.7408	0.898396	0	0	0.332411	0
ORR1A2-int:ERVL-MaLR:LTR	12274.7	-0.622984	0.192448	-3.23715	0.00120731	0.00470035	ORR1A2-int	ERVL-MaLR	LTR	Down	NA	2cWT-2cKO:8cWT-8cKO:8cWT-2cWT:8cKO-2cKO	ORR1A2-int:ERVL-MaLR:LTR	7155.06	6565.4	13720.7	10143.5	9365.94	9936.61	4867.45	1972.17	3962.97	3616.74	3576.01	2726.19	4121.72	2817.61	18343.7	25396.8	19821	16531	16038.4	20923.8	18413.2	18201.6	21118.2	14841.9	26880.5	16189.8	12608.6	14681.7	14486.6	8600.33	6762.52	11775.3	11126.8	9136.23	11697.2	10607.6
ORR1D-int:ERVL-MaLR:LTR	1254.67	-0.872082	0.299623	-2.9106	0.00360738	0.0120089	ORR1D-int	ERVL-MaLR	LTR	Down	NA	8cWT-2cWT:8cKO-2cKO	ORR1D-int:ERVL-MaLR:LTR	839.025	588.248	577.069	4217.45	2760.93	1781.78	547.852	761.419	949.617	1056.01	1064.15	669.887	1255.76	875.572	953.604	889.92	2263.83	1464.7	1850.64	915.724	805.48	1856.64	1723.95	2420.4	1420.48	1521.47	683.092	1597.83	1659.07	607.917	459.586	633.369	798.953	906.264	468.699	1100.86
MLT1F2:ERVL-MaLR:LTR	179.978	-1.54243	0.533241	-2.89256	0.0038212	0.0125988	MLT1F2	ERVL-MaLR	LTR	Down	NA	8cKO-2cKO	MLT1F2:ERVL-MaLR:LTR	74.7184	85.1673	68.4658	687.921	16.9904	83.2884	202.949	179.858	238.882	151.822	22.8499	30.269	69.4428	224.55	94.6325	284.028	182.47	229.107	229.326	335.174	206.825	314.915	82.7665	183.143	371.01	874.072	67.53	153.684	222.92	29.5195	75.7206	155.872	18.7438	42.3394	307.147	29.1619
ORR1A3-int:ERVL-MaLR:LTR	2370.95	-0.752242	0.261261	-2.87927	0.00398597	0.0130725	ORR1A3-int	ERVL-MaLR	LTR	Down	NA	2cWT-2cKO:8cWT-8cKO:8cWT-2cWT:8cKO-2cKO	ORR1A3-int:ERVL-MaLR:LTR	1302.9	1093.31	3021.39	2216.63	1503.65	1915.63	833.976	467.505	845.198	408.232	287.256	378.114	776.891	635.936	3100.63	4573.23	3628.51	2924.36	3079.6	3877.99	3072.02	3664.57	4261.42	3233.25	5006.42	6023.86	2128.49	3092.59	2992.58	952.004	1213.28	1577.13	1220.69	2282.29	1741.83	2697.48
MLT1J1-int:ERVL-MaLR:LTR	10.6538	-6.22984	2.18134	-2.85596	0.00429064	0.0139414	MLT1J1-int	ERVL-MaLR	LTR	Down	NA	8cKO-2cKO	MLT1J1-int:ERVL-MaLR:LTR	0	0	0	35.9697	0	0	0	0	0	0	0	0	0	0	0	0	1.09921	0	6.41471	0	0	152.926	1.41481	13.7156	147.813	0	0	1.21972	32.8767	0	0.292358	0.449198	0	0	0	0
MTC-int:ERVL-MaLR:LTR	1244.33	-0.683278	0.24806	-2.75449	0.00587838	0.0182884	MTC-int	ERVL-MaLR	LTR	Down	NA	8cWT-8cKO:8cWT-2cWT:8cKO-2cKO	MTC-int:ERVL-MaLR:LTR	826.572	757.79	812.698	2063.76	1282.77	584.506	714.203	731.965	770.825	215.925	355.806	530.451	833.314	532.654	1203.13	1178.74	2133.57	1652.02	2207.2	1989.64	1646.06	1807.93	1953.86	1821.35	1127.07	3621.95	1223.98	1386.82	1306.25	856.988	879.119	1116.26	861.041	719.769	999.891	1140.96
ORR1D1-int:ERVL-MaLR:LTR	298.955	-1.30381	0.490934	-2.65578	0.00791244	0.023609	ORR1D1-int	ERVL-MaLR	LTR	Down	NA	2cWT-2cKO:8cKO-2cKO	ORR1D1-int:ERVL-MaLR:LTR	56.8171	108.143	93.3624	40.466	552.187	5.94917	35.4884	334.648	167.956	50.6073	261.142	197.493	247.39	239.636	279.449	754.567	441.884	54.7552	396.643	625.449	461.088	217.495	607.662	410.661	339.969	1436.37	568.161	345.18	197.26	175.272	225.7	82.2032	108.948	465.733	275.568	120.293
MLT1J2:ERVL-MaLR:LTR	171.957	-1.88513	0.710587	-2.65292	0.00797991	0.0237634	MLT1J2	ERVL-MaLR	LTR	Down	NA	8cKO-2cKO	MLT1J2:ERVL-MaLR:LTR	339.346	50.7042	17.7833	8.99243	12.7428	471.472	446.931	77.0819	23.6419	0	204.017	67.9811	67.9961	113.726	271.765	32.5061	352.298	274.497	125.621	530.953	490.499	395.343	272.351	239.216	11.086	559.915	228.563	14.6366	104.243	4.61242	45.3154	150.032	42.1735	180.446	118.671	7.29047
MLT1H2:ERVL-MaLR:LTR	80.3791	-2.25301	0.866691	-2.59956	0.0093344	0.0271078	MLT1H2	ERVL-MaLR	LTR	Down	NA	8cKO-2cKO	MLT1H2:ERVL-MaLR:LTR	115.969	97.0511	20.4508	143.879	0	0	24.3982	73.9485	467.913	0	3.26428	10.9167	101.271	24.95	46.103	199.832	113.769	2.16139	62.0089	95.0182	271.34	194.839	19.8074	60.5099	8.1297	338.812	161.682	6.70844	123.488	10.1473	61.9798	12.1283	5.85743	88.7111	6.98062	0
ORR1B1-int:ERVL-MaLR:LTR	1341.19	-0.494976	0.1974	-2.50747	0.0121598	0.0338837	ORR1B1-int	ERVL-MaLR	LTR	Down	NA	2cWT-2cKO:8cKO-2cKO	ORR1B1-int:ERVL-MaLR:LTR	1078.75	570.423	810.03	1124.05	853.766	944.431	1441.71	988.278	950.109	1541.84	1503.2	994.41	1536.42	1107.09	1669.82	1815.01	1671.9	1019.46	1215.05	1403.35	1474.34	2063.94	2010.45	1350.18	1666.59	3777.84	925.291	1651.5	1076.11	1154.95	1144.29	1071.34	975.847	1831.68	861.608	1017.02
MLT1A-int:ERVL-MaLR:LTR	10.8157	5.49147	1.43874	3.81685	0.000135167	0.00069633	MLT1A-int	ERVL-MaLR	LTR	Up	8cKO-2cKO	NA	MLT1A-int:ERVL-MaLR:LTR	0	0	0.889166	0	0	0	0	1.88005	0	0	0	0.992425	0	16.8268	0.404412	2.13154	0	0.720463	0	0.522078	0	0	0	0.4034	0.739063	10.3393	0	0	0	153.132	3.21593	2.24599	0	93.7515	0.332411	0
ORR1C1-int:ERVL-MaLR:LTR	269.97	1.15466	0.398868	2.89484	0.00379348	0.0125208	ORR1C1-int	ERVL-MaLR	LTR	Up	8cKO-2cKO	2cWT-2cKO:8cWT-8cKO	ORR1C1-int:ERVL-MaLR:LTR	33.4676	90.713	198.284	44.9622	67.9615	101.136	31.0523	65.1749	93.5825	13.4953	79.9748	37.216	361.681	162.465	195.736	184.912	231.934	100.144	196.183	322.644	76.848	252.612	372.096	309.407	329.622	654.56	201.291	300.66	197.26	474.157	364.278	554.759	678.29	339.723	348.699	765.5
LTR85a:Gypsy:LTR	21.6613	-3.56667	1.18939	-2.99873	0.00271112	0.0094341	LTR85a	Gypsy	LTR	Down	8cWT-8cKO	8cKO-2cKO	LTR85a:Gypsy:LTR	0.778316	2.37676	13.3375	0	29.7331	0	16.6352	31.9608	0	0	324.796	4.46591	0	0	0	1.59866	30.2284	2.88185	1.60368	52.7299	24.6672	29.4525	8.48888	39.1298	0.739063	50.9014	1.94798	107.945	4.00936	0.922485	4.09301	0.449198	0	0	0.332411	7.29047
LTR81C:Gypsy:LTR	10.713	-6.04166	2.147	-2.81401	0.00489284	0.0156035	LTR81C	Gypsy	LTR	Down	NA	8cKO-2cKO	LTR81C:Gypsy:LTR	0	0.396127	0	0	0	0	0	81.4687	0.49254	0	0	0	0	0	0	0	7.14489	0.720463	143.262	15.1403	0	0	0	49.2147	42.1266	55.6734	0	0	0	0	0.292358	0.449198	0	0	0	0
RMER1B:RMER1B:Other	1491.5	-1.1067	0.299311	-3.6975	0.000217733	0.00106148	RMER1B	RMER1B	Other	Down	NA	2cWT-2cKO:8cKO-2cKO	RMER1B:RMER1B:Other	544.822	1003.39	858.934	1088.08	658.377	327.205	799.597	986.398	1077.68	2159.25	745.887	649.046	1495.91	888.337	1551.33	1413.21	2270.43	1647.7	2078.37	2519.55	2089.13	1733.16	1788.32	2577.72	2051.64	7037.91	1132.43	2121.7	1596.53	1415.09	1094	1487.74	593.943	1351.84	1431.69	656.143
IMPB_01:Satellite:Satellite	1867.78	-0.965561	0.315343	-3.06195	0.00219904	0.00792515	IMPB_01	Satellite	Satellite	Down	8cWT-2cWT	2cWT-2cKO:8cKO-2cKO	IMPB_01:Satellite:Satellite	675.579	794.234	790.468	1236.46	310.074	1008.38	1858.7	1332.33	1189.48	2918.36	2404.14	1368.06	2647.51	1033.4	2892.76	1614.65	1131.64	2233.44	1179.77	2797.81	1723.86	2963.37	1984.27	3328.45	2152.89	9897.93	1468.13	2296.12	1250.92	1805.3	1500.67	1381.73	659.546	1840.75	1144.82	944.116
MurSAT1:Satellite:Satellite	4.12598	3.61682	1.38332	2.6146	0.00893329	0.0261349	MurSAT1	Satellite	Satellite	Up	8cWT-2cWT:8cKO-2cKO	NA	MurSAT1:Satellite:Satellite	0	0	0	0	0	0	5.54506	0.626682	65.0152	0	0	0	47.7419	6.38257	0.404412	1.06577	0	0	0	0	0	1.13279	0	0.4034	0	0	0	0.609858	0	5.53491	1.46179	107.807	0	1.00808	11.6344	3.64524
B1_Mm:Alu:SINE	13747.8	1.20543	0.320837	3.75715	0.000171861	0.000858795	B1_Mm	Alu	SINE	Up	8cWT-2cWT:8cKO-2cKO	NA	B1_Mm:Alu:SINE	3221.45	4994.37	4333.79	12378.1	7590.44	4997.31	19104.9	16526.2	23309.4	20438.6	19151.5	23882.7	17687.7	24937.3	6936.88	5365.63	11055.9	5669.33	8725.08	9648.52	5197.2	6379.86	8067.26	9854.65	6203.7	37525.5	4205.04	5300.28	7127.84	16225.6	14259.2	15047.2	12923.8	20779.6	11032.4	39299.3
B1_Mus1:Alu:SINE	26257.9	0.905191	0.266415	3.39767	0.000679622	0.00286864	B1_Mus1	Alu	SINE	Up	8cWT-2cWT:8cKO-2cKO	NA	B1_Mus1:Alu:SINE	8706.25	11968.2	13261	22696.9	15223.4	10113.6	31850.8	24371.7	38651.6	31676.8	30269.6	41456.1	32619.3	35101.2	16788.8	13926.4	21646.8	13243.6	21740.5	22310	17280.4	18015.8	19959.5	21202.3	15243.2	71670.7	10858	13017.4	15047.1	31434.6	27037.2	27986.8	30612.1	44091.4	21742	56114.8
B1_Mus2:Alu:SINE	22317.6	0.778994	0.269828	2.887	0.00388935	0.0127918	B1_Mus2	Alu	SINE	Up	8cWT-2cWT:8cKO-2cKO	NA	B1_Mus2:Alu:SINE	7377.66	10605.9	9079.27	15871.6	14586.2	7614.94	27849.5	23800.8	37204.5	34777.3	24881.9	36747.5	28977.9	33971.5	15376.2	12527.6	20303.6	12334.3	18059	19000.5	13556.5	15233.7	13055.2	22365.7	11709.7	61208.1	9395.11	9466.22	13938.1	26503.9	20839.3	22300	23389.9	31819.1	17767.7	46564.3
B3:B2:SINE	99710.7	-0.895594	0.276299	-3.2414	0.00118946	0.00464123	B3	B2	SINE	Down	NA	8cWT-2cWT:8cKO-2cKO	B3:B2:SINE	63012.5	69902.9	99367	418081	259354	123145	45126.8	50414.7	35745.6	53596.5	48539.8	36067.2	81049.9	64665.9	89981.7	84862.7	131711	91353.3	128840	102021	83086.9	136940	131439	150238	87726.8	183270	81312	141234	117827	64350.7	38448.8	47196.3	63754.6	49174.2	26683.6	120876
B2_Mm2:B2:SINE	42594.8	1.7136	0.334127	5.12858	2.91937e-07	2.82647e-06	B2_Mm2	B2	SINE	Up	8cWT-2cWT:8cKO-2cKO	NA	B2_Mm2:B2:SINE	9589.64	15797.9	15356.8	26685	27125.1	24001.9	38551.4	25965.3	48301.9	51788.2	46248.3	67999	47156	48583.5	20261.9	16132.6	29543	17147	20847.8	25923.3	19469.1	22194.7	27961.7	33539.8	19228.2	94251.9	12158.6	15769.1	19431.8	39835.7	40193.6	54991.3	54878.2	90181.9	30140	150260
B2_Mm1a:B2:SINE	94406.3	1.87553	0.37804	4.96118	7.00654e-07	6.16689e-06	B2_Mm1a	B2	SINE	Up	8cKO-2cKO	8cWT-8cKO	B2_Mm1a:B2:SINE	25138.8	18846.1	31756.6	50870.2	49280.5	65710.1	51504.7	37734.4	82310.3	69305	48526.7	111603	91519.8	108494	33096.7	43807.5	92201	44222.8	40366.7	43717.8	50483.4	46985.7	79887.4	95982.1	26267.8	167062	32839.7	42285.1	57107.7	63353.5	71420.9	176756	160051	172520	37636.8	511598
B2_Mm1t:B2:SINE	56561.8	1.81634	0.384449	4.72452	2.30664e-06	1.81764e-05	B2_Mm1t	B2	SINE	Up	8cKO-2cKO	8cWT-8cKO	B2_Mm1t:B2:SINE	13994.1	12894.7	19569.7	27152.7	32328.4	38345.4	29742.6	23679.8	47237	46589.1	31944.2	75085.4	53407.3	56580.9	21288.7	26768.5	56555.7	25936.7	24660.3	29980.3	28436.6	25927.2	52950.1	59653.5	18135.9	110259	17368.2	22826.4	29640.4	37095.9	43261	89381.8	80656.7	104319	25285.5	322323
MurSatRep1:MurSatRep1:Unknown	2824.92	0.764474	0.221383	3.45317	0.000554034	0.00240292	MurSatRep1	MurSatRep1	Unknown	Up	8cKO-2cKO	NA	MurSatRep1:MurSatRep1:Unknown	1720.08	1386.84	2071.76	2517.88	2973.31	2879.4	3156.25	2878.98	2916.82	4095.82	3773.5	3602.5	1624.67	2879.7	2807.83	2924.48	3306.44	2773.78	2878.07	3309.97	1535.06	758.967	3343.91	1942.77	1119.68	2181.6	1775.91	1732.61	2242.83	3234.23	4464.3	3706.78	2245.74	4069.62	3769.54	4042.57
[truncated: 1 more columns]
