# Supplementary material for: SETDB1 enables development beyond cleavage stages by extinguishing the MERVL-driven two-cell totipotency transcriptional program in the mouse embryo
Source: eLife. 2026 Feb 16;15:RP109248. doi: 10.7554/eLife.109248 (PMC12908936; doi:10.7554/eLife.109248)
Supplement: Figure 1—figure supplement 5—source data 2. — TE expression analysis DESeq2 (v146.0) using uniquely mapped reads across four comparisons. [file elife-109248-fig1-figsupp5-data2.xlsx]

## Sheet: FOURWAY_2cWT_vs_2cKO_DE_TE_uni
Figure 1–figure supplement 5–Source Data 2. Differential TE Expression (DTE) – Unimapping Reads. TE expression analysis DESeq2 (v146.0) using uniquely mapped reads across four comparisons.
transcript_id	baseMean	log2FoldChange	lfcSE	stat	pvalue	padj	Direction	gene_id	family_id	class_id	tetranscripts_id	FOUR_WAY_UP_COMP	FOUR_WAY_DOWN_COMP	TZSC118	TZSC119	TZSC120	TZSC121	TZSC122	TZSC123	TZSC125	TZSC126	TZSC127	TZSC128	TZSC129	TZSC130	TZSC131	TZSC132	TZSC94	TZSC95	TZSC96	TZSC97	TZSC98	TZSC99	TZSC100	TZSC101	TZSC102	TZSC103	TZSC104	TZSC105	TZSC106	TZSC107	TZSC108	TZSC109	TZSC110	TZSC111	TZSC112	TZSC113	TZSC114	TZSC115
														2c WT	2c WT	2c WT	2c WT	2c WT	2c WT	8c WT	8c WT	8c WT	8c WT	8c WT	8c WT	8c WT	8c WT	2c KO	2c KO	2c KO	2c KO	2c KO	2c KO	2c KO	2c KO	2c KO	2c KO	2c KO	2c KO	2c KO	2c KO	2c KO	8c KO	8c KO	8c KO	8c KO	8c KO	8c KO	8c KO
URR1A_dup6537	58.9606	-19.2622	2.42478	-7.94393	1.95874e-15	3.17815e-13	Down	URR1A	hAT-Charlie	DNA	URR1A:hAT-Charlie:DNA	8cWT-2cWT	2cWT-2cKO	0	0	0	0	0	0	0	630.648	892.216	43.6697	0	72.8622	0	0	0.122145	23.1704	0	0	15.2747	0.0690769	0	0	8.13729	0	0.14008	0	0	0	0	0	1.0193	0	0	4.09357	136.582	353.538
URR1A_dup7007	98.9263	-18.7123	3.27909	-5.70655	1.15289e-08	5.41239e-07	Down	URR1A	hAT-Charlie	DNA	URR1A:hAT-Charlie:DNA	8cWT-2cWT	2cWT-2cKO	0	0	0	0	0	0	2139.65	0	0	0	0	400.742	937.247	115.449	0	0	0	9.05111	0	0	0	0	0	0	0	0	22.1771	0	0	0	1.0193	34.9393	0	0	0	0
URR1B_dup11455	261.469	-16.8059	2.35785	-7.12766	1.0209e-12	1.01794e-10	Down	URR1B	hAT-Charlie	DNA	URR1B:hAT-Charlie:DNA	8cWT-8cKO:8cWT-2cWT	2cWT-2cKO	0	0	0	0	0	0	66.864	399.411	251.206	8864.96	0	0	0	80.8144	0	0	0	0	0	0	0	0	0	0.0786089	20.4516	1.75205	5.74961	0	0	0	2.0386	0	1.35292	0	0	0
URR1B_dup3292	73.7004	-18.8047	2.79223	-6.73465	1.64323e-11	1.25873e-09	Down	URR1B	hAT-Charlie	DNA	URR1B:hAT-Charlie:DNA	8cWT-2cWT	2cWT-2cKO	0	0	0	0	0	0	245.168	0	0	305.688	0	97.1495	0	1985.72	0	0	6.7787	0	18.8851	0	2.21681	0	0	2.04383	0	0	0	0	3.90285	0	0	0	0	59.3567	0	0
MER2_dup299	30.2052	-5.38274	1.46323	-3.67868	0.00023444	0.00405454	Down	MER2	TcMar-Tigger	DNA	MER2:TcMar-Tigger:DNA	8cKO-2cKO	2cWT-2cKO:8cWT-8cKO	0	0	0.832132	0	0	0	0	0	8.66229	0	0	0	0	0	0.732873	16.8314	13.8322	4.6308	6.7579	0.621692	0.492624	8.42554	48.4594	23.2682	20.0314	34.8949	0	25.0587	6.34213	634.683	40.772	0	121.763	1.02339	99.4762	0
MER44A_dup586	3.13871	-4.46892	1.60141	-2.79062	0.00526079	0.0446479	Down	MER44A	TcMar-Tigger	DNA	MER44A:TcMar-Tigger:DNA	NA	2cWT-2cKO:8cKO-2cKO	0	0	0.832132	0	0	0	0	0	0	0	0	0	0	0	0	29.2909	11.3589	0	13.7935	3.592	0.738936	0.290536	21.0112	17.2153	0	8.03021	0.273791	3.86621	2.43928	0	0	0	0	0	0	3.39941
Tigger15a_dup640	38.2922	-19.808	2.69477	-7.35055	1.97398e-13	2.1883e-11	Down	Tigger15a	TcMar-Tigger	DNA	Tigger15a:TcMar-Tigger:DNA	8cWT-2cWT	2cWT-2cKO	0	0	0	0	0	0	300.888	0	17.3246	0	0	12.1437	371.667	392.527	0	0.109294	0.183208	21.2596	0	0	0	0	0.121452	4.87375	0	43.9472	0	0	0	0	251.767	0	0	0	0	0
L3_dup2580	47.3891	-17.3624	3.1232	-5.55918	2.71041e-08	1.17702e-06	Down	L3	CR1	LINE	L3:CR1:LINE	8cWT-8cKO:8cWT-2cWT	2cWT-2cKO:8cKO-2cKO	0	0	0	0	0	0	0	0	0	0	6377.15	0	0	1743.28	18.444	0	3.11454	0	0	1.03615	0	4.0675	0	0.0786089	0	0	0	1.57512	0.243928	0	0	0	0	132.018	0	0
L3b_dup210	436.736	-4.3548	1.44047	-3.02318	0.0025013	0.0260462	Down	L3b	CR1	LINE	L3b:CR1:LINE	8cWT-8cKO:8cWT-2cWT:8cKO-2cKO	2cWT-2cKO	0	0.511321	0.832132	0	0	0	2262.23	1303.34	121.272	5895.41	2912.11	145.724	630.218	1327.66	0.244291	0.109294	0.091604	0.210491	22.1252	3.592	25.3701	0.290536	10.6878	13.5207	0	42.4871	13.142	0	1.7075	634.683	213.034	0	0	165.79	7.10544	401.13
HAL1M8_dup422	63.8516	-18.9961	2.91685	-6.51255	7.3886e-11	4.93901e-09	Down	HAL1M8	L1	LINE	HAL1M8:L1:LINE	8cWT-2cWT	2cWT-2cKO	0	0	0	0	0	0	66.864	189.194	0	0	0	400.742	1551.3	0	0.122145	0	0	0	0	0	1.47787	1.74322	0	0	26.335	10.9503	0	0	0	0	0	113.777	0	0	0	0
L1_Mur2_dup9457	4.8966	-5.10146	1.48379	-3.43814	0.000585719	0.00861823	Down	L1_Mur2	L1	LINE	L1_Mur2:L1:LINE	NA	2cWT-2cKO:8cKO-2cKO	0	0	0	2.77932	0	0	0	0	0	0	0	0	0	0	0.977164	15.5198	25.5575	0	3.33266	6.07877	3.20206	0	0	19.0233	0.560318	25.5507	43.5328	15.608	14.3918	0	1.0193	2.68764	1.35292	0	0	0
L1_Mur3_dup24450	110.59	-19.3432	2.69981	-7.16467	7.79738e-13	7.90725e-11	Down	L1_Mur3	L1	LINE	L1_Mur3:L1:LINE	8cWT-2cWT	2cWT-2cKO	0	0	0	0	0	0	122.584	945.972	0	0	1916.83	12.1437	0	715.784	0.855018	0	0	0	0	0	44.0898	0	0	0	0	0.292008	0	0	4.87856	7.23973	306.809	14.3341	0	0	0	0
L1_Mur3_dup24506	5.91783	-4.1118	1.3577	-3.0285	0.00245768	0.0256819	Down	L1_Mur3	L1	LINE	L1_Mur3:L1:LINE	NA	2cWT-2cKO:8cKO-2cKO	1.16685	2.55661	0	0	0	0	0	0	0	0	0	0	0	0	1.09931	0.109294	2.74812	1.05245	0	0.207231	14.7787	12.7836	49.1881	27.5917	23.1131	38.837	12.5944	4.0094	26.1003	0	0	0	0	1.02339	0	0
L1_Mur3_dup6967	5.61564	-4.3638	1.39924	-3.11869	0.00181656	0.0206641	Down	L1_Mur3	L1	LINE	L1_Mur3:L1:LINE	NA	2cWT-2cKO	0	1.02264	0	0	2.6429	0	0	0	0	0	0	0	0	23.0898	10.7488	0.546472	2.83972	2.3154	51.0082	5.52615	17.9808	0.290536	35.9498	8.96141	8.68494	0	1.64275	14.0329	7.07391	0	0	0	0	0	13.4214	0
L1_Mus1_dup13647	23.8467	-6.47735	1.16757	-5.54773	2.8941e-08	1.24768e-06	Down	L1_Mus1	L1	LINE	L1_Mus1:L1:LINE	NA	2cWT-2cKO:8cWT-8cKO	0	0	0	0	0	1.17156	0	0	0	0	0	0	0	0	60.8284	19.8916	27.5728	39.1513	26.4761	16.2331	23.6459	8.13501	12.0238	54.3973	29.2766	48.9113	10.9516	30.7864	36.5892	7.23973	0	0	244.879	59.3567	4.73696	23.7958
L1_Mus1_dup21252	4.39929	-5.19174	1.7392	-2.98513	0.00283455	0.0284859	Down	L1_Mus1	L1	LINE	L1_Mus1:L1:LINE	NA	2cWT-2cKO	0	0	0	0	0	0	0	0	0	0	0	0	0	0	4.0308	18.0336	2.56491	36.6254	0.185148	7.66754	0.492624	0	7.28713	0.628871	0	45.5532	3.0117	1.14554	1.21964	0	0	0	0	32.7485	1.57899	0
L1_Mus1_dup3954	13.5833	-6.31141	1.42304	-4.43515	9.20085e-06	0.000237651	Down	L1_Mus1	L1	LINE	L1_Mus1:L1:LINE	8cWT-2cWT	2cWT-2cKO	0	0	0	0	0	0	0	0	0	0	0	0	0	11.5449	0.366436	8.41568	3.38935	59.3584	18.5148	0.345385	12.8082	0.290536	50.5241	33.566	4.76271	60.8836	16.975	0.143193	8.78141	0	179.397	4.4794	2.70584	6.14035	15.7899	3.39941
L1_Mus1_dup8386	13.9269	-4.47664	0.898805	-4.98065	6.33704e-07	2.06896e-05	Down	L1_Mus1	L1	LINE	L1_Mus1:L1:LINE	NA	2cWT-2cKO:8cKO-2cKO	0	5.11321	0	0	2.6429	0	11.144	0	0	0	0	0	0	0	16.8561	32.1326	62.7487	68.4096	55.2666	64.656	17.7345	36.6075	17.6106	49.1305	2.94167	44.6772	1.64275	12.7442	9.5132	0	2.0386	0.895879	0	0	0.789493	0
L1_Mus2_dup15212	5.50705	-5.29767	1.49487	-3.54391	0.000394241	0.00621043	Down	L1_Mus2	L1	LINE	L1_Mus2:L1:LINE	NA	2cWT-2cKO:8cKO-2cKO	0	0	0.832132	0	0	0	0	0	0	0	0	0	1422.03	0	0.855018	38.581	24.1835	26.9428	24.3469	7.52938	0	0	1.45743	6.60315	46.0862	3.6501	8.76131	0	9.5132	0	1.0193	0	0	0	0	3.39941
L1_Mus2_dup5634	17.6231	-4.54884	1.39041	-3.27159	0.00106945	0.0137816	Down	L1_Mus2	L1	LINE	L1_Mus2:L1:LINE	8cWT-2cWT:8cKO-2cKO	2cWT-2cKO:8cWT-8cKO	0	0	0	0	0	0	0	0	0	0	0	0	16.1594	0	0	5.13684	7.05351	5.26227	11.6643	12.2957	1.47787	0	7.89439	6.91758	3.78215	16.6444	0	1.71831	2.19535	0	107.026	139.757	1.35292	66.5205	195.005	44.1923
L1_Mus3_dup1561	6.48247	-4.92613	1.5744	-3.1289	0.00175462	0.0200618	Down	L1_Mus3	L1	LINE	L1_Mus3:L1:LINE	8cWT-8cKO:8cWT-2cWT	2cWT-2cKO:8cKO-2cKO	0	0	0	0	0	0	122.584	0	8.66229	0	0	0	0	0	0.244291	1.31153	0.45802	0	0.833165	5.73338	0.985248	0	34.8568	28.2206	2.52143	16.3524	0.547582	13.8897	0.731784	0	0	0.895879	0	1.02339	0	0
L1_Mus3_dup20043	13.0817	-5.53836	1.85101	-2.99208	0.00277083	0.0280191	Down	L1_Mus3	L1	LINE	L1_Mus3:L1:LINE	NA	2cWT-2cKO	0	0	0.832132	0	0	0	0	0	0	0	0	0	0	0	3.90865	62.735	28.3972	33.2576	27.0316	9.04908	0	0.290536	22.2257	30.1072	0	3.50409	0	15.608	0	0	104.988	0	56.8227	0	85.2653	0
L1_Mus3_dup35110	135.605	-15.1168	2.13894	-7.06745	1.57803e-12	1.50613e-10	Down	L1_Mus3	L1	LINE	L1_Mus3:L1:LINE	8cWT-2cWT:8cKO-2cKO	2cWT-2cKO	0	0	0	0	0	0	144.872	157.662	0	87.3395	0	121.437	2068.41	1327.66	1.09931	0.109294	0	0	0	0	0	0	0	0	0	0	0.821373	0	0	878.42	66.2545	158.571	0	0	4.73696	0
L1_Mus3_dup37422	9.01467	-5.50993	1.79851	-3.06361	0.00218684	0.0237552	Down	L1_Mus3	L1	LINE	L1_Mus3:L1:LINE	NA	2cWT-2cKO	0	0	0	0	0	0	0	0	0	43.6697	0	0	0	0	17.4668	6.44837	0.274812	14.9449	21.8474	0	0	2.90536	1.09307	3.61601	0	52.5614	35.5928	3.43663	0	0	1.0193	0	0	15.3509	96.3182	16.997
L1_Mus3_dup44581	516.941	-16.2534	1.95316	-8.32162	8.67708e-17	1.86589e-14	Down	L1_Mus3	L1	LINE	L1_Mus3:L1:LINE	8cWT-8cKO:8cWT-2cWT:8cKO-2cKO	2cWT-2cKO	0	0	0	0	0	0	11.144	21.0216	554.387	12183.9	5603.05	461.46	0	0	0	0	12.0001	1.05245	0	0.276308	0	0	0	0.157218	0	0.146004	0.273791	0	0	137.555	97.8528	29.564	0	0	22.1058	0
L1_Mus3_dup7049	15.9996	-6.23906	1.47308	-4.23538	2.28167e-05	0.000533726	Down	L1_Mus3	L1	LINE	L1_Mus3:L1:LINE	8cWT-2cWT	2cWT-2cKO	0	0	0	0	0	0	0	0	8.66229	0	0	0	16.1594	0	13.8024	5.46472	57.8937	0.420982	23.7915	1.17431	0	2.90536	25.262	34.8237	17.51	65.4097	12.0468	3.57982	1.21964	0	1.0193	3.58352	74.4107	0	8.68443	214.163
L1M2_dup1482	5.23992	-5.25423	1.75958	-2.98608	0.0028258	0.02843	Down	L1M2	L1	LINE	L1M2:L1:LINE	8cWT-2cWT	2cWT-2cKO	0	0	0	0	0	0	0	0	0	0	0	12.1437	0	23.0898	17.9554	17.815	1.00764	71.3564	4.53612	4.42092	0	0	5.95116	0.70748	5.32302	0.876023	1.64275	2.57747	0	0	0	0	0	0	24.4743	0
L1M3_dup3335	362.404	-20.1102	2.03876	-9.86391	5.96798e-23	3.91479e-20	Down	L1M3	L1	LINE	L1M3:L1:LINE	8cWT-2cWT	2cWT-2cKO	0	0	0	0	0	0	0	861.886	1351.32	4410.64	368.621	2076.57	387.826	3348.02	0	0.109294	0	0	8.60937	0	0	0.581072	0.850165	0.0786089	0	18.6885	55.3058	0	6.34213	0	0	79.7332	2.70584	0	431.063	0
L1M3f_dup93	410.588	-18.5082	2.245	-8.24418	1.66291e-16	3.29773e-14	Down	L1M3f	L1	LINE	L1M3f:L1:LINE	8cWT-8cKO:8cWT-2cWT	2cWT-2cKO	0	0	0	0	0	0	501.48	1345.38	0	0	12606.9	170.012	274.71	0	1.71004	0	0.183208	0	0	0.207231	0	20.047	0	0	0	0	5.47582	0	0	2.41324	0	50.1692	0	1.02339	127.108	84.9851
L1M4_dup10956	14.0918	-6.31879	1.63077	-3.87473	0.000106744	0.00208672	Down	L1M4	L1	LINE	L1M4:L1:LINE	NA	2cWT-2cKO	0	0	0	0	0	0	0	0	0	0	0	0	0	0	83.6696	0.546472	13.2826	2.3154	27.6796	8.22015	4.92624	2.90536	0	20.6741	0	15.9144	12.3206	20.047	68.0559	7.23973	1.0193	1.79176	0	0	24.4743	0
L1M4b_dup149	13.8587	-4.31912	1.35586	-3.18553	0.00144491	0.0173079	Down	L1M4b	L1	LINE	L1M4b:L1:LINE	NA	2cWT-2cKO	8.16793	0	0	0	0	0	0	10.5108	0	0	0	24.2874	0	0	2.32076	1.09294	16.4887	18.9442	3.14751	0.345385	0.492624	22.0807	15.303	47.8728	8.96509	184.111	91.72	4.58217	7.07391	0	21.4053	0	0	21.4912	2.36848	0
L1M4b_dup150	5.91387	-5.71535	1.5842	-3.60771	0.000308907	0.0051097	Down	L1M4b	L1	LINE	L1M4b:L1:LINE	8cWT-2cWT	2cWT-2cKO:8cKO-2cKO	0	0	0	0	0	0	0	21.0216	0	0	0	12.1437	0	0	0	22.2961	12.0001	18.9442	0	6.97677	12.0693	23.2429	14.8172	39.4617	3.64207	30.6608	0.273791	0	0.243928	0	1.0193	0	0	0	0	0
L1M5_dup12491	6.1659	-5.6632	1.46329	-3.87019	0.000108752	0.00211439	Down	L1M5	L1	LINE	L1M5:L1:LINE	NA	2cWT-2cKO	0	0	0	0	0	0	11.144	0	0	0	0	0	0	0	0.855018	17.5964	14.0154	26.7324	8.1465	1.10523	0.492624	5.22965	2.7934	22.8752	0	56.9415	19.713	0.859157	0.731784	0	17.3281	0	0	18.4211	3.15797	0
L1M5_dup6432	7.33048	-4.95296	1.37958	-3.5902	0.000330426	0.00539565	Down	L1M5	L1	LINE	L1M5:L1:LINE	NA	2cWT-2cKO	0	0	0	5.55864	0	0	0	0	0	0	0	0	0	0	0.855018	19.2358	11.1757	0	3.24009	4.62815	64.78	0	4.61518	6.36732	4.34247	29.6388	28.2005	6.87325	46.8342	0	2.0386	1.79176	0	1.02339	7.10544	0
L1MA5_dup4805	98.3903	-11.7426	2.35751	-4.98092	6.32812e-07	2.06896e-05	Down	L1MA5	L1	LINE	L1MA5:L1:LINE	8cWT-2cWT:8cKO-2cKO	2cWT-2cKO	0	0	0	0	0	0	1170.12	1660.71	0	0	0	60.7185	16.1594	600.335	0	0	0	0.210491	0	0	0	0	0	0	0	0	0	0	0	0	37.7141	84.2126	0	0	10.2634	0
L1MA6_dup5583	71.9269	-19.9245	2.13834	-9.3177	1.1889e-20	5.22959e-18	Down	L1MA6	L1	LINE	L1MA6:L1:LINE	8cWT-2cWT	2cWT-2cKO	0	0	0	0	0	0	11.144	725.246	0	0	73.7243	12.1437	1680.58	0	0	0	7.41992	0	8.97967	0	0	5.52018	0	6.83897	0	0	34.2239	13.7465	0	4.82649	1.0193	2.68764	369.348	0	71.8439	0
L1MC_dup5191	12.5883	-4.08652	1.29718	-3.15031	0.00163097	0.0189146	Down	L1MC	L1	LINE	L1MC:L1:LINE	NA	2cWT-2cKO	0	0	0	0	5.2858	1.17156	0	10.5108	0	0	36.8621	0	0	0	10.0159	0.109294	0.549624	5.47276	35.4558	19.8941	3.94099	0	18.2178	34.1162	4.06231	0.730019	38.6045	18.9014	1.95142	0	93.7756	1.79176	8.11753	107.456	0.789493	3.39941
L1MC1_dup4729	102.699	-18.3879	3.28413	-5.59902	2.15571e-08	9.57094e-07	Down	L1MC1	L1	LINE	L1MC1:L1:LINE	8cWT-2cWT	2cWT-2cKO	0	0	0	0	0	0	0	94.5972	666.996	0	2948.97	0	0	0	3.90865	0	0	11.577	0	0	0	9.29715	0	0	0	0	0	0	0	48.2649	0	0	16.2351	0	0	0
L1MD_dup2344	9.88461	-4.33348	1.39371	-3.10931	0.00187524	0.0211162	Down	L1MD	L1	LINE	L1MD:L1:LINE	NA	2cWT-2cKO	0	3.06793	0	0	0	0	11.144	0	0	0	0	0	0	0	1.95433	0	7.60313	13.8924	1.85148	26.6637	0.492624	3.48643	11.0521	12.9705	0.980557	70.5198	67.3526	6.15729	1.21964	0	1.0193	78.8374	9.47045	2.04678	33.9482	0
L1Md_A_dup105	7.18441	-5.01133	1.8273	-2.74247	0.00609787	0.0494704	Down	L1Md_A	L1	LINE	L1Md_A:L1:LINE	NA	2cWT-2cKO	0	0	0	0	0	0	0	0	17.3246	0	36.8621	0	0	0	12.3367	1.9673	0.091604	1.47344	3.79553	1.10523	3.44837	9.58769	12.631	1.41496	0	12.2643	53.3893	0	0	0	0	0	0	1.02339	97.1077	0
L1Md_A_dup6985	11.0434	-6.0106	1.54342	-3.89434	9.84682e-05	0.00194625	Down	L1Md_A	L1	LINE	L1Md_A:L1:LINE	8cWT-8cKO:8cWT-2cWT	2cWT-2cKO:8cKO-2cKO	0	0	0	2.77932	0	0	0	0	8.66229	0	0	24.2874	0	46.1796	0	0	36.0004	42.9402	7.86878	4.07554	1.72418	20.6281	26.4766	23.3468	0	76.944	0.273791	56.8475	28.7835	0	0	0	0	0	0.789493	0
L1Md_A_dup8126	26.5996	-20.5033	2.14501	-9.5586	1.19357e-21	6.45539e-19	Down	L1Md_A	L1	LINE	L1Md_A:L1:LINE	8cWT-2cWT	2cWT-2cKO	0	0	0	0	0	0	0	0	0	0	0	449.317	0	11.5449	9.16091	3.82531	0	16.4183	2.03663	22.8645	0	0	0.485809	4.71653	0.14008	29.6388	0	0	29.7592	0	43.8299	0	0	67.5439	292.902	0
L1Md_F_dup3654	108.788	-18.2146	3.12658	-5.82572	5.68661e-09	2.85097e-07	Down	L1Md_F	L1	LINE	L1Md_F:L1:LINE	8cWT-2cWT	2cWT-2cKO	0	0	0	0	0	0	0	0	190.57	0	0	1979.42	1518.99	92.3593	0	0	0	16.4183	0	0	0	0	0.121452	0	0	4.96413	0	0	0	217.192	0	0	0	5.11696	0	0
L1Md_F2_dup26007	11.8443	-3.2136	0.84514	-3.80245	0.000143272	0.00267481	Down	L1Md_F2	L1	LINE	L1Md_F2:L1:LINE	8cWT-8cKO	2cWT-2cKO:8cKO-2cKO	0	5.62453	4.99279	2.77932	0	0	0	0	0	0	0	12.1437	48.4783	11.5449	22.3526	41.4226	40.947	43.7821	14.4415	32.328	27.5869	5.22965	28.1769	39.7761	26.8953	9.19824	1.36896	3.57982	7.8057	0	1.0193	0	6.76461	0	0	0
L1Md_F2_dup28107	6.97133	-5.95656	1.99909	-2.97964	0.00288591	0.0288397	Down	L1Md_F2	L1	LINE	L1Md_F2:L1:LINE	NA	2cWT-2cKO	0	0	0	0	0	0	11.144	0	0	0	0	0	0	0	0	36.5044	1.28246	17.6812	0.0925739	0	1.72418	8.71608	23.4403	0.157218	0	89.7924	0	17.8991	20.9778	0	1.0193	0	0	0	0	0
L1Md_F2_dup58580	6.7021	-4.55742	1.60303	-2.843	0.00446907	0.0398024	Down	L1Md_F2	L1	LINE	L1Md_F2:L1:LINE	NA	2cWT-2cKO	1.16685	0	0	2.77932	0	0	0	0	0	0	0	0	0	11.5449	0	2.73236	67.6037	1.68393	16.5707	0.690769	0	40.675	12.0238	19.1806	3.50199	2.77407	0.821373	4.58217	5.85427	0	0	0.895879	0	0	52.8961	0
L1Md_F2_dup8541	69.6204	-14.2857	3.13714	-4.55373	5.2703e-06	0.00014427	Down	L1Md_F2	L1	LINE	L1Md_F2:L1:LINE	8cWT-2cWT:8cKO-2cKO	2cWT-2cKO	0	0	0	0	0	0	0	0	433.115	524.037	36.8621	0	0	1408.48	0	0	0	0	0	1.03615	0	0	0	0	0	0	0	0	0	0	107.026	65.3992	0	0	0	0
L1Md_F2_dup9928	5.76942	-5.11277	1.85615	-2.75451	0.00587806	0.0483019	Down	L1Md_F2	L1	LINE	L1Md_F2:L1:LINE	NA	2cWT-2cKO	0	0	0	0	0	0	0	0	8.66229	0	0	0	0	0	3.42007	0.109294	0.91604	0.210491	4.07325	12.1575	35.4689	0.871608	19.4323	14.1496	0	30.0768	0	0.715964	0	0	46.8878	0	0	0	36.3167	0
L1ME3F_dup120	8.84442	-4.97609	1.66435	-2.9898	0.00279156	0.0281808	Down	L1ME3F	L1	LINE	L1ME3F:L1:LINE	8cWT-8cKO:8cWT-2cWT	2cWT-2cKO:8cKO-2cKO	0	0	0	0	0	0	0	189.194	25.9869	0	0	0	0	0	14.7796	3.27883	0	9.68258	1.7589	0	0.246312	36.317	3.76502	15.879	7.42422	7.5922	0.821373	9.16434	0	0	0	0	1.35292	0	0	0
L1MEc_dup2196	5.00282	-5.5877	1.91105	-2.92389	0.00345684	0.0328529	Down	L1MEc	L1	LINE	L1MEc:L1:LINE	NA	2cWT-2cKO	0	0	0	0	0	0	11.144	0	0	0	0	0	0	0	0.122145	10.383	0.824436	0	25.2727	6.63138	33.2521	0	21.497	16.0362	0	53.8754	1.09516	0	0	0	0	0	0	1.02339	3.94747	0
L1MEf_dup2474	24.2269	-5.94009	1.32296	-4.49002	7.1218e-06	0.00019057	Down	L1MEf	L1	LINE	L1MEf:L1:LINE	NA	2cWT-2cKO	0	1.53396	0	2.77932	0	0	0	0	0	0	36.8621	0	16.1594	11.5449	10.8709	36.1765	50.8402	109.876	19.1628	41.1008	25.3701	9.00662	31.9419	56.4412	50.989	50.0793	0	23.9132	87.5702	0	0	0.895879	0	2.04678	207.637	13.5976
L1MEj_dup103	3.12597	-4.88085	1.67321	-2.91706	0.0035335	0.0333876	Down	L1MEj	L1	LINE	L1MEj:L1:LINE	NA	2cWT-2cKO:8cKO-2cKO	0	0	0	0	0	0	0	0	0	0	0	12.1437	0	0	0	0.109294	0.45802	3.99933	0.277722	0	4.43362	9.58769	23.3188	33.566	1.68096	15.7684	0.273791	0.286386	9.75712	0	0	0	0	0	0	0
L1VL1_dup12	5.739	-22.1888	2.91558	-7.61042	2.73197e-14	3.50793e-12	Down	L1VL1	L1	LINE	L1VL1:L1:LINE	NA	2cWT-2cKO:8cWT-8cKO	0	0	0	0	0	0	0	0	0	0	0	0	0	0	0	7.10414	6.59549	0	0	0	0	0	9.47327	1.49357	14.2881	59.4236	0	0.286386	0	0	0	0	0	66.5205	106.582	0
L1VL4_dup2213	6.70124	-5.60674	1.86615	-3.00443	0.00266075	0.0271742	Down	L1VL4	L1	LINE	L1VL4:L1:LINE	NA	2cWT-2cKO	0	0	0	0	0	0	0	0	0	0	0	0	0	0	1.95433	12.7875	0	6.31473	1.29603	6.49323	0	0.581072	6.67987	10.6908	6.1635	76.652	7.39236	34.2231	0	0	9.1737	0	0	67.5439	0	0
Lx_dup24474	6.64447	-23.4155	1.63397	-14.3305	1.41179e-46	2.51976e-42	Down	Lx	L1	LINE	Lx:L1:LINE	NA	2cWT-2cKO:8cWT-8cKO	0	0	0	0	0	0	0	0	0	0	0	0	0	0	1.46575	6.22979	0.641228	30.9422	13.9787	4.35185	0.492624	0	0.364356	6.13149	6.8639	4.38011	0.547582	10.7395	12.1964	0	1.0193	0	0	1.02339	144.477	0
Lx_dup2978	8.28429	-3.91147	1.26694	-3.08734	0.00201956	0.0223605	Down	Lx	L1	LINE	Lx:L1:LINE	NA	2cWT-2cKO	2.33369	0	0	0	0	1.17156	0	0	0	0	36.8621	0	0	11.5449	5.86298	1.9673	2.65652	30.7317	16.293	10.7069	0.246312	0	16.8819	0.471653	15.5488	24.8207	1.91654	11.169	16.831	0	8.1544	0	0	7.16374	45.7906	37.3935
Lx_dup352	24.1998	-5.85739	1.46158	-4.00758	6.13442e-05	0.00129878	Down	Lx	L1	LINE	Lx:L1:LINE	8cWT-2cWT	2cWT-2cKO	1.16685	0	1.66426	0	0	0	44.576	10.5108	0	0	0	24.2874	0	0	50.0796	16.3942	46.1684	1.26295	30.7345	13.0555	95.3227	0	19.9182	43.2349	2.80159	51.8314	6.29719	20.4766	65.8606	0	341.465	0	0	4.09357	0.789493	3.39941
Lx_dup6223	13.8474	-22.5119	2.27112	-9.91224	3.6831e-23	2.5283e-20	Down	Lx	L1	LINE	Lx:L1:LINE	NA	2cWT-2cKO:8cWT-8cKO	0	0	0	0	0	0	0	0	0	0	0	0	0	0	7.32873	18.3615	0	0.210491	4.81384	0	0	0	14.2099	13.5993	0	0.438011	0	23.6268	28.7835	217.192	141.683	42.1063	0	0	0	0
Lx_dup7783	108.675	-11.9153	2.54018	-4.69072	2.72248e-06	7.92671e-05	Down	Lx	L1	LINE	Lx:L1:LINE	8cWT-2cWT:8cKO-2cKO	2cWT-2cKO	0	0	0	0	0	0	0	0	632.347	0	36.8621	376.454	581.739	2320.53	0	0	0	0	0	0	0.246312	0	0	0	0	0	0	0	0	0	0	40.3146	32.4701	0	0	0
Lx2_dup15737	36.7939	-4.41885	1.03665	-4.26261	2.0205e-05	0.000476378	Down	Lx2	L1	LINE	Lx2:L1:LINE	NA	2cWT-2cKO:8cWT-8cKO	0	0.511321	7.48919	0	0	0	33.432	10.5108	0	43.6697	0	0	0	0	16.0011	77.0526	39.2065	11.577	33.6043	26.3874	33.991	49.9722	77.9723	52.8252	19.4711	10.2203	4.38066	18.1855	26.3442	16.8927	1.0193	184.551	2.70584	466.667	79.7388	16.997
Lx2_dup3176	8.25	-25.8697	2.27276	-11.3825	5.11023e-30	1.01342e-26	Down	Lx2	L1	LINE	Lx2:L1:LINE	NA	2cWT-2cKO:8cWT-8cKO	0	0	0	0	0	0	0	0	0	0	0	0	0	0	0	5.57402	16.1223	57.6745	4.6287	0.345385	0	0	0.242904	6.83897	0	39.421	0	10.8827	0.243928	0	0	0	0	134.064	29.2113	0
Lx2B_dup3272	10.8868	-20.6024	2.28119	-9.03143	1.69439e-19	6.17171e-17	Down	Lx2B	L1	LINE	Lx2B:L1:LINE	8cWT-2cWT	2cWT-2cKO	0	0	0	0	0	0	0	0	0	43.6697	0	0	0	0	7.93945	0	1.37406	7.57767	0	4.83538	0	0	21.2541	23.6613	0	43.9472	0	32.9343	0.731784	0	0	0	0	86.9883	127.898	0
Lx2B2_dup7823	8.89168	-3.22426	1.14626	-2.81284	0.00491064	0.0426913	Down	Lx2B2	L1	LINE	Lx2B2:L1:LINE	NA	2cWT-2cKO	4.66739	1.02264	1.66426	0	0	1.17156	11.144	0	0	0	36.8621	0	0	0	9.64949	19.8916	4.94662	0.210491	14.9044	5.73338	57.3907	0	26.2337	23.2682	25.9147	12.4103	5.20203	5.72771	4.63463	0	1.0193	0	0	7.16374	48.1591	0
Lx3_Mus_dup264	6.10071	-5.11884	1.53326	-3.33852	0.000842245	0.0113609	Down	Lx3_Mus	L1	LINE	Lx3_Mus:L1:LINE	8cWT-2cWT	2cWT-2cKO:8cKO-2cKO	0	0	0	0	2.6429	0	33.432	0	0	0	0	12.1437	0	0	1.09931	38.7995	1.64887	0	11.8495	13.2628	7.14305	0	7.53003	22.5607	0	42.6331	4.92824	23.77	0.243928	0	2.0386	0	0	0	0	0
Lx3_Mus_dup2674	5.30511	-4.4671	1.54483	-2.89164	0.00383234	0.0353669	Down	Lx3_Mus	L1	LINE	Lx3_Mus:L1:LINE	NA	2cWT-2cKO	0	0	0	0	0	0	0	10.5108	0	0	0	0	0	0	1.58789	2.62307	27.5728	7.99866	1.85148	0.967077	2.95574	0	5.10099	0.235827	11.2064	4.81813	0	10.4531	0.243928	0	0	95.8591	0	6.14035	1.57899	0
Lx3_Mus_dup3068	76.2975	-5.18355	1.62184	-3.19609	0.00139303	0.0168884	Down	Lx3_Mus	L1	LINE	Lx3_Mus:L1:LINE	8cWT-2cWT:8cKO-2cKO	2cWT-2cKO	0	0	0	0	0	0	0	0	207.895	567.706	0	12.1437	856.449	369.437	2.80935	0.655767	17.9544	7.57767	0	0	2.21681	5.22965	0	1.49357	0	1.16803	28.2005	29.3545	31.2228	91.7032	364.909	48.3775	21.6467	14.3275	140.53	0
Lx3_Mus_dup3070	142.806	-5.22666	1.32833	-3.93477	8.32755e-05	0.00167944	Down	Lx3_Mus	L1	LINE	Lx3_Mus:L1:LINE	8cWT-2cWT:8cKO-2cKO	2cWT-2cKO	0	0	0	5.55864	0	0	0	105.108	978.839	655.046	0	97.1495	614.058	773.509	13.3139	0	6.32068	0.420982	10.646	4.14461	36.7005	14.8173	0.850165	12.263	34.4596	0.146004	38.057	37.9461	67.3242	579.178	174.3	699.682	4.05877	154.532	104.213	61.1893
Lx3A_dup3270	6.79828	-5.70534	1.33525	-4.27287	1.92974e-05	0.000458616	Down	Lx3A	L1	LINE	Lx3A:L1:LINE	NA	2cWT-2cKO:8cKO-2cKO	0	0.511321	0	0	0	0	0	0	0	0	0	0	0	0	2.32076	0.327883	12.0001	74.3033	11.2014	15.0588	13.3008	5.22965	2.67195	28.8495	52.2497	10.3663	0.273791	0.429578	22.4414	0	0	0	0	0	0	0
Lx3B_dup2910	9.23381	-5.2625	1.67291	-3.14572	0.0016568	0.0191681	Down	Lx3B	L1	LINE	Lx3B:L1:LINE	NA	2cWT-2cKO	0	0.511321	0	0	2.6429	0	11.144	0	0	0	0	0	0	0	42.9952	37.2694	32.0614	29.4687	27.4945	44.1401	26.1091	0.290536	5.8297	4.87375	1.4008	0	0	0	0.731784	0	0	0	0	1.02339	70.2649	3.39941
Lx4B_dup5022	26.7799	-4.91354	1.37397	-3.57616	0.00034868	0.0056319	Down	Lx4B	L1	LINE	Lx4B:L1:LINE	8cWT-2cWT	2cWT-2cKO	0	0	0	0	0	2.34313	0	84.0864	8.66229	0	442.346	24.2874	0	0	0	23.2797	8.33596	18.5232	16.2004	22.5191	21.4291	0	0.121452	4.08766	14.7084	7.5922	33.4025	4.86855	49.2735	2.41324	1.0193	61.8157	12.1763	31.7252	3.94747	0
Lx5_dup8311	5.90228	-4.39023	1.37761	-3.18684	0.00143837	0.0172759	Down	Lx5	L1	LINE	Lx5:L1:LINE	NA	2cWT-2cKO	0	0	0	0	0	2.34313	0	0	0	43.6697	0	0	0	0	6.47371	33.9906	9.61842	0.210491	17.8668	40.2028	1.47787	0.290536	3.76502	23.2682	6.44366	2.33606	0	5.15494	4.63463	0	0	0	0	7.16374	9.47392	0
Lx5b_dup1607	6.20764	-4.83394	1.30137	-3.7145	0.000203602	0.00359791	Down	Lx5b	L1	LINE	Lx5b:L1:LINE	NA	2cWT-2cKO:8cKO-2cKO	1.16685	0	0	0	0	1.17156	0	10.5108	0	0	0	0	0	0	4.88582	14.4269	33.5271	0.210491	12.4049	7.46031	0.246312	0.581072	0.607261	68.7042	0.980557	25.4047	3.55928	25.9179	11.2207	0	0	0	0	5.11696	1.57899	0
Lx7_dup25006	78.1971	-17.1875	2.15002	-7.9941	1.30527e-15	2.13729e-13	Down	Lx7	L1	LINE	Lx7:L1:LINE	8cWT-2cWT:8cKO-2cKO	2cWT-2cKO	0	0	0	0	0	0	0	1524.07	0	0	0	291.449	0	738.874	0	2.29518	0	4.42031	0	0	0	0	0	0	2.24127	0	0.273791	0.143193	0.731784	0	90.7177	9.85467	0	38.8889	2.36848	186.967
Lx8_dup20129	23.9447	-4.42624	1.16945	-3.78488	0.000153782	0.00284893	Down	Lx8	L1	LINE	Lx8:L1:LINE	NA	2cWT-2cKO:8cWT-8cKO	0	3.06793	0	0	0	1.17156	0	10.5108	0	43.6697	0	0	0	11.5449	58.2634	34.0999	19.42	0.841964	82.7611	24.246	3.69468	0.581072	12.7525	10.7694	2.10119	14.7464	26.2839	3.15024	9.02534	24.1324	0	2.68764	17.588	97.2222	174.478	0
Lx8_dup34556	104.851	-15.1567	2.87451	-5.2728	1.34361e-07	5.04859e-06	Down	Lx8	L1	LINE	Lx8:L1:LINE	8cWT-2cWT:8cKO-2cKO	2cWT-2cKO	0	0	0	0	0	0	11.144	483.497	0	611.376	0	0	1357.39	1350.75	1.58789	0	0	0	0	0	0	0	0	0	0	0	0.547582	0	0	0	63.1966	0	0	0	0	0
Lx8_dup41755	79.1845	-13.5476	2.13435	-6.3474	2.18983e-10	1.34773e-08	Down	Lx8	L1	LINE	Lx8:L1:LINE	8cWT-2cWT:8cKO-2cKO	2cWT-2cKO	0	0	0	0	0	0	0	567.583	0	0	0	1566.54	0	404.072	0.610727	0	0	0	0	0	0	0	0	0	0	0.146004	0	0	0	0	101.93	5.37527	0	76.7544	43.4221	44.1923
Lx8_dup5579	15.1074	-4.89506	1.13117	-4.32744	1.5085e-05	0.000369832	Down	Lx8	L1	LINE	Lx8:L1:LINE	8cWT-2cWT	2cWT-2cKO:8cWT-8cKO	0	0.511321	0	0	0	1.17156	0	0	0	43.6697	0	0	0	11.5449	8.30589	6.55767	17.588	4.6308	2.31435	13.6772	29.3111	2.32429	15.1815	43.9424	14.5683	29.4928	6.0234	1.28874	0.975712	0	68.2931	5.37527	13.5292	6.14035	136.582	71.3875
Lx8_dup9638	66.2299	-16.5873	3.26613	-5.0786	3.80231e-07	1.29264e-05	Down	Lx8	L1	LINE	Lx8:L1:LINE	8cWT-2cWT	2cWT-2cKO	0	0	0	0	0	0	612.92	809.332	277.193	0	0	0	711.015	0	0	0	0	0	0	0	0	0	0	0	0	6.27816	0	0	0	2.41324	0	31.3558	0	0	0	0
Lx8b_dup11859	108.242	-18.7501	2.73111	-6.86539	6.63098e-12	5.60899e-10	Down	Lx8b	L1	LINE	Lx8b:L1:LINE	8cWT-8cKO:8cWT-2cWT	2cWT-2cKO:8cKO-2cKO	0	0	0	0	0	0	0	735.756	0	0	0	765.053	161.594	2308.98	7.93945	21.2031	1.64887	0	0	0	0	0	0	0	0	2.62807	0	0.143193	0	0	0	0	0	0	0	0
Lx8b_dup17252	506.323	-23.1654	2.48514	-9.32155	1.14653e-20	5.22959e-18	Down	Lx8b	L1	LINE	Lx8b:L1:LINE	8cWT-2cWT	2cWT-2cKO	0	0	0	0	0	0	0	0	5769.09	0	0	5525.38	0	5645.46	108.343	50.7126	76.3061	0	0	0	81.5293	0	99.5908	91.2649	0	112.715	0	109.256	123.672	0	0	0	262.467	0	678.175	0
Lx9_dup16532	3.87328	-4.8009	1.51717	-3.16436	0.00155422	0.0182498	Down	Lx9	L1	LINE	Lx9:L1:LINE	NA	2cWT-2cKO:8cKO-2cKO	0	0	0.832132	0	0	0	0	0	0	0	0	0	0	0	24.0627	5.79261	2.3817	24.417	5.55443	19.6178	3.44837	39.5129	2.7934	11.8699	0.14008	0	0.821373	0	0.487856	0	0	0	0	0	1.57899	0
Lx9_dup20548	16.7726	-6.75237	1.71728	-3.93203	8.42322e-05	0.00169299	Down	Lx9	L1	LINE	Lx9:L1:LINE	NA	2cWT-2cKO	0	0	0	0	0	0	0	0	0	0	36.8621	0	0	0	27.4827	33.1162	5.40464	3.36786	108.867	37.5778	1.72418	0	54.7749	6.76036	0.560318	0.730019	32.5811	65.8687	0	2.41324	0	0	1.35292	199.561	1.57899	0
Lx9_dup20609	3.47397	-5.04097	1.79949	-2.80133	0.00508918	0.0437532	Down	Lx9	L1	LINE	Lx9:L1:LINE	NA	2cWT-2cKO:8cKO-2cKO	0	0	0	0	0	0	11.144	0	0	0	0	0	0	0	1.83218	41.8598	18.5956	0.420982	0	16.5785	0	3.77697	0	10.9266	2.52143	16.0604	3.0117	0	0	0	1.0193	0	0	0	0.789493	0
Lx9_dup34187	26.9856	-5.55286	1.67631	-3.31255	0.000924489	0.0122406	Down	Lx9	L1	LINE	Lx9:L1:LINE	8cWT-2cWT	2cWT-2cKO	0	0	0	0	2.6429	0	22.288	0	34.6492	0	0	72.8622	0	92.3593	1.71004	0.218589	0	0	11.3866	0.207231	96.0617	0	33.1564	3.5374	0	13.1403	53.6631	2.86386	22.1975	0	1.0193	27.7723	1.35292	58.3333	0	295.748
MusHAL1_dup1182	13.679	-5.41385	1.71482	-3.15709	0.0015935	0.0185524	Down	MusHAL1	L1	LINE	MusHAL1:L1:LINE	NA	2cWT-2cKO	0	0	0	0	2.6429	0	0	0	0	0	36.8621	0	0	0	11.8481	13.4432	32.611	85.6698	11.8495	16.4403	8.37461	0	14.5743	18.4731	0.420239	0	0.547582	0	1.95142	0	87.6598	94.0673	0	0	68.6859	0
MusHAL1_dup1183	13.5163	-4.32531	1.54169	-2.80558	0.00502268	0.0433695	Down	MusHAL1	L1	LINE	MusHAL1:L1:LINE	8cWT-2cWT	2cWT-2cKO	0	0.511321	0	0	2.6429	0	0	0	0	0	0	0	0	277.078	0	17.5964	9.1604	19.1547	1.11089	27.0781	0.738936	6.39179	1.09307	19.495	0.14008	0	13.6896	8.30518	8.04963	0	5.0965	4.4794	0	67.5439	1.57899	0
MusHAL1_dup2752	8.91677	-5.20462	1.53775	-3.38458	0.000712883	0.0100581	Down	MusHAL1	L1	LINE	MusHAL1:L1:LINE	NA	2cWT-2cKO	0	0.511321	0	0	2.6429	0	0	0	0	0	0	0	0	0	0.122145	2.62307	23.6338	0	17.4039	4.62815	26.1091	0	11.538	14.9357	76.3434	28.7628	27.1053	0.429578	9.26927	0	0	0	55.4698	10.2339	18.1583	0
L2_dup14036	258.332	-19.3976	2.17528	-8.91729	4.77822e-19	1.55058e-16	Down	L2	L2	LINE	L2:L2:LINE	8cWT-2cWT	2cWT-2cKO	0	0	0	0	0	0	1760.75	1870.92	51.9738	0	0	3169.5	662.536	1593.2	0	5.9019	2.65652	0	6.66532	0	16.0103	0	0	0	0	16.9364	0	4.43898	0	193.059	202.841	0.895879	0	0	0	0
L2a_dup7409	51.5054	-14.9295	2.83382	-5.26834	1.37665e-07	5.16185e-06	Down	L2a	L2	LINE	L2a:L2:LINE	8cWT-2cWT:8cKO-2cKO	2cWT-2cKO	0	0	0	0	0	0	0	199.705	25.9869	0	774.105	267.161	500.942	0	1.83218	0	0	0	0	0	0	0	0	0	0	0	0	0	0	0	0	0	0	104.386	31.5797	0
MER89_dup438	17.8085	-5.18536	1.70748	-3.03684	0.00239072	0.0251738	Down	MER89	ERV1	LTR	MER89:ERV1:LTR	NA	2cWT-2cKO	1.16685	0.511321	0	0	0	0	0	10.5108	0	0	0	0	0	0	0.122145	8.08779	0.91604	6.10424	0.185148	3.38477	148.033	0.581072	0	1.17913	0	0	4.65445	18.7583	47.8099	0	59.1194	74.358	221.879	1.02339	50.5276	0
MER89_dup441	18.4101	-5.95349	1.75487	-3.39255	0.000692464	0.00983222	Down	MER89	ERV1	LTR	MER89:ERV1:LTR	NA	2cWT-2cKO	0	0	0	0	0	0	0	0	17.3246	0	0	0	0	0	51.6675	32.8976	15.3895	17.0498	7.96136	0.0690769	0.492624	0	0	17.3726	0.980557	0	69.8167	0	4.14678	2.41324	44.8492	80.6291	0	1.02339	165.794	0
MERV1_I-int_dup800	6.48947	-3.65903	1.32775	-2.75582	0.00585459	0.0481937	Down	MERV1_I-int	ERV1	LTR	MERV1_I-int:ERV1:LTR	NA	2cWT-2cKO	2.33369	0.511321	0	0	0	0	0	0	8.66229	0	0	12.1437	0	0	1.09931	0.655767	2.3817	0	9.81283	2.97031	30.0501	0.290536	49.7954	4.71653	6.72382	6.13216	0.547582	0.715964	0.975712	0	6.1158	20.6052	1.35292	0	20.5268	50.9911
MMERGLN-int_dup649	72.5272	-20.4113	2.19085	-9.3166	1.20133e-20	5.22959e-18	Down	MMERGLN-int	ERV1	LTR	MMERGLN-int:ERV1:LTR	8cWT-2cWT	2cWT-2cKO	0	0	0	0	0	0	0	42.0432	181.908	0	0	0	1858.33	0	0.732873	0	0.824436	0	0.370296	0.345385	43.1046	0.581072	4.37228	1.17913	0	51.2473	0	13.1737	0	0	0	131.694	265.173	0	88.4233	0
MMERGLN-int_dup803	12.8927	-5.73133	1.71526	-3.34138	0.000833633	0.0112717	Down	MMERGLN-int	ERV1	LTR	MMERGLN-int:ERV1:LTR	8cWT-2cWT	2cWT-2cKO	0	0	0.832132	0	0	0	11.144	0	0	0	0	0	0	138.539	28.582	15.7384	11.5421	1.47344	0.555443	0.0690769	2.95574	49.3911	12.8739	51.0958	0.700398	85.8502	8.48752	0.143193	0	0	350.639	0	0	0	0	0
MuLV-int_dup265	9.31505	-6.09991	1.66908	-3.65466	0.00025752	0.00436489	Down	MuLV-int	ERV1	LTR	MuLV-int:ERV1:LTR	NA	2cWT-2cKO	0	0	0	0	0	0	0	0	0	0	0	12.1437	0	0	35.6665	2.84166	0.091604	51.3598	2.40692	0.0690769	43.5972	0.581072	6.19406	6.83897	11.0663	64.6797	15.6061	0.143193	0	7.23973	0	0	16.2351	0	67.8964	0
MuRRS-int_dup113	14.3239	-5.01821	1.49851	-3.34879	0.000811643	0.0110497	Down	MuRRS-int	ERV1	LTR	MuRRS-int:ERV1:LTR	NA	2cWT-2cKO	1.16685	0	0	0	0	1.17156	0	0	0	0	0	24.2874	0	11.5449	2.56505	22.0775	0.732832	25.8904	2.4995	10.0162	9.35985	21.2091	19.6752	25.3907	0	67.1618	34.7715	0	2.68321	0	221.188	10.7505	0	11.2573	0	0
MuRRS4-int_dup359	25.1762	-3.84549	1.35712	-2.83356	0.00460322	0.0406322	Down	MuRRS4-int	ERV1	LTR	MuRRS4-int:ERV1:LTR	8cWT-2cWT	2cWT-2cKO	0	0.511321	0	0	0	3.51469	11.144	10.5108	138.597	0	147.449	24.2874	32.3188	23.0898	14.0467	39.1274	0	2.10491	2.40692	11.6049	9.60617	1.45268	0.607261	26.4912	37.5413	1.75205	0	0.859157	24.6367	0	162.069	0	9.47045	36.8421	159.478	0
RLTR6-int_dup31	17.902	-4.37564	1.17289	-3.73064	0.000190993	0.00341269	Down	RLTR6-int	ERV1	LTR	RLTR6-int:ERV1:LTR	NA	2cWT-2cKO	2.33369	2.04528	2.4964	0	0	0	0	0	8.66229	0	0	12.1437	0	0	40.7966	45.2479	13.191	14.5239	0.740591	21.2757	13.3008	34.5738	12.0238	15.4859	25.9147	0	71.1857	95.796	6.0982	0	3.0579	164.842	1.35292	49.1228	1.57899	0
RLTR6-int_dup59	6.60674	-4.30542	1.29045	-3.33639	0.000848752	0.0114242	Down	RLTR6-int	ERV1	LTR	RLTR6-int:ERV1:LTR	8cWT-2cWT	2cWT-2cKO	0	0	0.832132	0	0	0	11.144	10.5108	0	0	0	0	16.1594	0	3.90865	15.957	3.66416	6.73571	0	4.28277	1.9705	11.912	1.09307	5.18819	2.52143	3.06608	20.8081	8.59157	9.75712	2.41324	0	86.9003	2.70584	14.3275	0	0
RLTR6-int_dup950	26.1026	-2.61939	0.845546	-3.09787	0.00194915	0.0217427	Down	RLTR6-int	ERV1	LTR	RLTR6-int:ERV1:LTR	NA	2cWT-2cKO	9.33477	8.18114	5.82493	0	7.9287	4.68626	0	42.0432	8.66229	87.3395	0	24.2874	16.1594	0	21.9862	8.63426	3.29774	51.9913	18.6999	31.2228	83.4998	18.8848	25.0191	61.3935	1.96111	162.064	9.03511	31.6456	35.6135	0	26.5018	15.2299	2.70584	23.538	118.424	0
RLTR6-int_dup957	10.001	-4.92115	1.38574	-3.55127	0.000383377	0.00609306	Down	RLTR6-int	ERV1	LTR	RLTR6-int:ERV1:LTR	8cWT-2cWT	2cWT-2cKO:8cKO-2cKO	0	0.511321	0.832132	2.77932	0	0	78.008	0	1793.09	0	0	0	0	0	2.44291	29.4002	0.091604	5.26227	1.57376	0	60.5927	50.5533	20.2825	5.42401	0	42.3411	35.0453	10.0235	2.92714	9.65297	2.0386	0.895879	5.41169	0	63.949	0
RMER21A_dup50	6.36618	-5.9236	1.31147	-4.51678	6.27882e-06	0.000169794	Down	RMER21A	ERV1	LTR	RMER21A:ERV1:LTR	8cWT-8cKO:8cWT-2cWT	2cWT-2cKO:8cKO-2cKO	0	0	0	0	0	0	22.288	0	0	0	0	0	0	0	37.4987	8.85285	49.741	20.6281	11.6643	0.345385	31.2816	0.290536	2.30759	5.58123	3.64207	30.8068	1.64275	2.14789	6.82999	0	0	0	0	0	0	0
RMER5_dup3958	96.2387	-11.4491	2.25581	-5.07541	3.86662e-07	1.30951e-05	Down	RMER5	ERV1	LTR	RMER5:ERV1:LTR	8cWT-2cWT:8cKO-2cKO	2cWT-2cKO	0	0	0	0	0	0	0	10.5108	0	0	2064.28	497.891	0	577.245	0	0	0	0	0	0	0	0	0.121452	0	0	0	0	0	0	106.183	150.856	112.881	0	20.4678	0	20.3964
RodERV21-int_dup1613	35.3178	-4.56252	1.60797	-2.83745	0.00454753	0.0403095	Down	RodERV21-int	ERV1	LTR	RodERV21-int:ERV1:LTR	8cWT-2cWT	2cWT-2cKO	0	0	0.832132	0	0	1.17156	44.576	0	0	0	0	425.029	113.116	346.347	0	26.5586	0.366416	0.210491	9.90541	4.62815	41.6267	0	19.068	12.8919	0.700398	19.5645	35.319	0	0.975712	0	4.0772	15.2299	0	116.667	67.8964	0
BGLII_dup1494	55.1758	-13.716	3.26621	-4.19937	2.67657e-05	0.00061561	Down	BGLII	ERVK	LTR	BGLII:ERVK:LTR	8cWT-2cWT:8cKO-2cKO	2cWT-2cKO	0	0	0	0	0	0	1136.69	0	0	0	0	0	0	519.521	0	0	0	0	0	0	0	2.90536	0	0	0	0	0	0	0	118.249	77.4668	29.564	0	0	157.109	0
ERVB4_1B-I_MM-int_dup1049	2.80219	-4.81497	1.49218	-3.22681	0.00125179	0.0155802	Down	ERVB4_1B-I_MM-int	ERVK	LTR	ERVB4_1B-I_MM-int:ERVK:LTR	NA	2cWT-2cKO:8cKO-2cKO	0	0	0	0	0	0	0	0	0	0	0	0	0	0	22.3526	0.765061	11.7253	0	6.57275	6.286	2.70943	10.4593	0.242904	5.73845	0	24.8207	0.547582	4.43898	2.19535	4.82649	0	0	0	0	0	0
ERVB4_2-I_MM-int_dup271	151.342	-13.2845	2.01348	-6.59776	4.17425e-11	2.92165e-09	Down	ERVB4_2-I_MM-int	ERVK	LTR	ERVB4_2-I_MM-int:ERVK:LTR	8cWT-2cWT:8cKO-2cKO	2cWT-2cKO	0	0	0	0	0	0	1493.3	0	675.659	0	0	2064.43	0	57.7245	0	0	0	0	0	0.0690769	0.246312	0	0.121452	0	0	0.292008	0	0	0	651.576	519.843	35.8352	0	8.18714	92.3707	0
ERVB4_2-I_MM-int_dup309	249.306	-13.3037	1.89355	-7.02579	2.12861e-12	1.97872e-10	Down	ERVB4_2-I_MM-int	ERVK	LTR	ERVB4_2-I_MM-int:ERVK:LTR	8cWT-2cWT:8cKO-2cKO	2cWT-2cKO	0	0	0	0	0	0	66.864	42.0432	8.66229	0	5345.01	1032.21	0	1327.66	0	0.327883	0	0	0	0	0.246312	0	0	0	0	0	0	0	0	579.178	606.483	100.338	50.0581	0	58.4225	6.79881
ETnERV-int_dup143	12.1567	-6.30828	1.49046	-4.23245	2.3116e-05	0.000540018	Down	ETnERV-int	ERVK	LTR	ETnERV-int:ERVK:LTR	8cWT-2cWT	2cWT-2cKO:8cKO-2cKO	0	0	0	0	0	1.17156	0	0	0	0	0	24.2874	16.1594	0	14.9017	42.7341	9.43521	10.5245	5.83216	4.76631	26.1091	0	54.7749	33.7232	0.560318	164.254	14.5109	17.8991	0	0	8.1544	0	0	0	0	0
ETnERV-int_dup144	14.761	-5.84096	1.35761	-4.3024	1.68961e-05	0.00040862	Down	ETnERV-int	ERVK	LTR	ETnERV-int:ERVK:LTR	8cWT-2cWT	2cWT-2cKO:8cKO-2cKO	1.16685	0	0	2.77932	0	0	0	0	0	43.6697	0	12.1437	48.4783	0	26.9941	19.7823	6.59549	6.73571	1.48118	3.38477	2.95574	31.959	13.4812	80.8099	0	158.998	58.3175	2.0047	12.1964	0	0	0	0	5.11696	7.10544	0
ETnERV3-int_dup31	145.644	-18.6919	2.81634	-6.63695	3.20236e-11	2.28623e-09	Down	ETnERV3-int	ERVK	LTR	ETnERV3-int:ERVK:LTR	8cWT-2cWT	2cWT-2cKO	0	0	0	0	0	0	969.528	336.346	0	0	3501.9	0	16.1594	0	0	0	0	0	0	0	0	0	0	0	0	0	0	0	31.2228	156.861	153.914	2.68764	0	47.076	169.741	3.39941
IAPEz-int_dup1020	21.7088	-3.91227	1.41401	-2.76678	0.00566127	0.0470402	Down	IAPEz-int	ERVK	LTR	IAPEz-int:ERVK:LTR	8cWT-2cWT:8cKO-2cKO	2cWT-2cKO	0	0	0.832132	0	0	0	11.144	0	259.869	0	0	0	0	0	0	6.33908	3.02293	0	1.7589	1.03615	16.0103	0.290536	2.18614	0.550262	5.18295	7.88421	6.57099	7.15964	18.0507	166.514	182.455	2.68764	47.3523	44.0059	5.52645	6.79881
IAPEz-int_dup1043	18.3792	-3.51301	1.18318	-2.96913	0.00298648	0.029449	Down	IAPEz-int	ERVK	LTR	IAPEz-int:ERVK:LTR	8cWT-2cWT:8cKO-2cKO	2cWT-2cKO	0	0	0.832132	5.55864	0	0	0	73.5756	0	0	0	24.2874	0	23.0898	5.61869	3.38813	15.3895	0.210491	6.7579	1.58877	10.8377	22.6618	1.57888	7.9395	15.9691	12.5563	0	6.73006	5.61035	77.2238	236.478	73.4621	16.2351	1.02339	26.8428	0
IAPEz-int_dup1384	10.0906	-3.65947	1.30465	-2.80494	0.00503262	0.0434184	Down	IAPEz-int	ERVK	LTR	IAPEz-int:ERVK:LTR	8cWT-2cWT	2cWT-2cKO	0	0	0	0	0	0	33.432	0	34.6492	87.3395	0	97.1495	0	23.0898	0.977164	1.31153	14.1986	0.420982	12.4049	0.345385	0	0	0.728713	1.49357	0.14008	1.75205	1.09516	0.572771	8.78141	9.65297	27.5211	6.27115	0	3.07018	2.36848	0
IAPEz-int_dup1419	22.7175	-4.37912	1.36415	-3.21014	0.00132671	0.0162855	Down	IAPEz-int	ERVK	LTR	IAPEz-int:ERVK:LTR	8cWT-2cWT:8cKO-2cKO	2cWT-2cKO	0	0	0	0	0	0	11.144	42.0432	0	393.028	110.586	0	16.1594	0	11.726	9.9458	21.6185	0.420982	9.72026	4.76631	0.246312	0.581072	1.09307	3.61601	1.68096	3.9421	0.273791	0.286386	2.92714	4.82649	153.914	25.0846	2.70584	2.04678	1.57899	0
IAPEz-int_dup1425	23.692	-4.49128	1.27948	-3.51024	0.000447703	0.00690632	Down	IAPEz-int	ERVK	LTR	IAPEz-int:ERVK:LTR	8cWT-2cWT	2cWT-2cKO	1.16685	0	0	0	0	0	345.464	10.5108	25.9869	87.3395	0	72.8622	0	11.5449	1.46575	4.48107	17.588	0	7.86878	7.66754	0.246312	23.2429	18.7036	3.93044	0	1.75205	3.0117	18.4719	4.39071	0	41.7913	48.3775	87.9399	2.04678	17.3689	6.79881
IAPEz-int_dup1858	57.0594	-3.17991	1.07343	-2.96238	0.0030527	0.0299201	Down	IAPEz-int	ERVK	LTR	IAPEz-int:ERVK:LTR	8cWT-2cWT:8cKO-2cKO	2cWT-2cKO	1.16685	1.02264	0.832132	0	2.6429	0	55.72	714.735	34.6492	87.3395	36.8621	85.0059	16.1594	46.1796	1.46575	2.51377	14.107	0.210491	18.8851	0.690769	3.94099	1.74322	16.8819	18.9447	1.12064	23.0686	10.9516	0.859157	7.8057	130.315	269.095	87.7962	0	48.0994	341.851	10.1982
IAPEz-int_dup193	12.4823	-3.77393	1.372	-2.75068	0.00594719	0.0487193	Down	IAPEz-int	ERVK	LTR	IAPEz-int:ERVK:LTR	8cWT-2cWT:8cKO-2cKO	2cWT-2cKO	0	0	0	0	0	0	0	42.0432	17.3246	0	0	24.2874	0	23.0898	0.366436	4.26248	0.274812	0	0.46287	0.483538	2.70943	1.45268	3.40066	1.10052	0.840478	15.9144	4.92824	11.169	0.731784	0	20.386	8.06291	2.70584	2.04678	269.217	0
IAPEz-int_dup2132	18.2084	-3.67184	1.30613	-2.81123	0.00493519	0.042842	Down	IAPEz-int	ERVK	LTR	IAPEz-int:ERVK:LTR	8cWT-2cWT:8cKO-2cKO	2cWT-2cKO	0	0.511321	0	0	0	0	0	52.554	25.9869	4061.28	0	194.299	0	0	0	0.546472	5.77105	0.420982	2.1292	0.276308	6.40411	20.9186	0.242904	0.550262	1.12064	4.96413	10.9516	6.0141	1.46357	125.489	43.8299	10.7505	1.35292	38.8889	53.6856	64.5887
IAPEz-int_dup2137	17.7734	-18.9212	1.70703	-11.0842	1.4962e-28	2.05417e-25	Down	IAPEz-int	ERVK	LTR	IAPEz-int:ERVK:LTR	8cWT-2cWT:8cKO-2cKO	2cWT-2cKO	0	0	0	0	0	0	0	231.238	60.636	0	0	0	32.3188	92.3593	0.122145	4.48107	4.76341	0.420982	2.31435	0.0690769	0	7.2634	1.57888	12.263	0	2.62807	0	0.429578	0.487856	7.23973	191.628	5.37527	0	0	0	0
IAPEz-int_dup2177	16.7553	-5.4125	1.52593	-3.54701	0.000389633	0.00616504	Down	IAPEz-int	ERVK	LTR	IAPEz-int:ERVK:LTR	NA	2cWT-2cKO:8cWT-8cKO	0	0	0	0	0	0	0	0	0	0	0	0	0	0	2.56505	0	14.565	0	32.3083	0.0690769	9.11354	0.871608	13.8455	11.0052	0.980557	46.1372	0.547582	0.286386	17.3189	65.1576	74.4089	222.178	4.05877	2.04678	97.8972	0
IAPEz-int_dup223	7.91846	-4.61669	1.35344	-3.41107	0.000647076	0.00931454	Down	IAPEz-int	ERVK	LTR	IAPEz-int:ERVK:LTR	8cWT-2cWT	2cWT-2cKO	0	0	0	0	0	0	33.432	0	0	0	0	24.2874	0	34.6347	0.244291	0.327883	0.45802	10.5245	2.1292	0.345385	0.246312	1.16214	10.5663	9.7475	0.420239	2.19006	12.5944	1.14554	34.3939	7.23973	47.9071	11.6464	0	10.2339	37.1062	0
IAPEz-int_dup2265	101.756	-3.29194	1.16485	-2.82608	0.00471221	0.0414487	Down	IAPEz-int	ERVK	LTR	IAPEz-int:ERVK:LTR	8cWT-2cWT:8cKO-2cKO	2cWT-2cKO	1.16685	0.511321	0	2.77932	2.6429	1.17156	378.896	10.5108	0	611.376	0	1384.38	0	473.341	1.22145	0.655767	4.39699	40.4143	5.46186	5.04261	0.492624	1.16214	16.396	13.8352	8.12462	19.1265	41.89	5.72771	5.12249	376.466	208.956	88.692	9.47045	2.04678	35.5272	3.39941
IAPEz-int_dup2313	268.86	-6.58856	1.32188	-4.98423	6.22106e-07	2.04106e-05	Down	IAPEz-int	ERVK	LTR	IAPEz-int:ERVK:LTR	8cWT-2cWT:8cKO-2cKO	2cWT-2cKO	0	0.511321	0	0	0	0	33.432	84.0864	337.829	5022.02	0	12.1437	16.1594	1881.82	50.8125	0.765061	24.5499	14.5239	45.3612	9.80892	71.1842	39.5129	44.6944	12.5774	47.2068	27.8867	42.7114	21.0493	10.4889	755.345	858.25	418.376	2.70584	12.2807	5.52645	44.1923
IAPEz-int_dup2501	12.4071	-4.14791	1.28845	-3.2193	0.00128502	0.015861	Down	IAPEz-int	ERVK	LTR	IAPEz-int:ERVK:LTR	8cWT-2cWT	2cWT-2cKO	0	0.511321	0	0	0	0	0	10.5108	138.597	43.6697	0	60.7185	0	11.5449	0.122145	0.765061	0	0.631473	5.64701	6.97677	0	19.7564	7.16568	0.314435	10.0857	11.5343	2.46412	5.44133	14.6357	24.1324	48.9264	8.06291	9.47045	2.04678	1.57899	0
IAPEz-int_dup2517	11.1226	-3.20254	1.02665	-3.1194	0.00181218	0.0206274	Down	IAPEz-int	ERVK	LTR	IAPEz-int:ERVK:LTR	8cWT-2cWT	2cWT-2cKO	0	3.06793	0	0	0	4.68626	11.144	10.5108	8.66229	0	0	874.346	80.7971	0	11.8481	11.0387	1.64887	0.210491	8.33165	8.63461	15.025	29.9252	4.49373	19.0233	0.560318	43.9472	35.5928	5.44133	9.02534	7.23973	23.4439	186.343	0	0	38.6852	6.79881
IAPEz-int_dup2558	35.8731	-5.04182	1.51098	-3.33678	0.000847548	0.0114166	Down	IAPEz-int	ERVK	LTR	IAPEz-int:ERVK:LTR	8cWT-2cWT:8cKO-2cKO	2cWT-2cKO	0	0	0	0	0	0	22.288	0	0	87.3395	0	0	0	11.5449	0.977164	0.218589	0.91604	0.841964	1.57376	8.77277	0.738936	40.3845	26.598	0.864698	0	1.60604	3.55928	0.429578	28.5396	571.939	442.376	49.2734	18.9409	1.02339	3.15797	3.39941
IAPEz-int_dup2743	10.5861	-4.40803	1.27417	-3.45953	0.000541115	0.00808186	Down	IAPEz-int	ERVK	LTR	IAPEz-int:ERVK:LTR	8cWT-2cWT	2cWT-2cKO	0	0	0	0	0	0	11.144	0	8.66229	0	0	157.868	16.1594	11.5449	2.07647	0.874356	1.83208	0.210491	0.185148	8.56554	0.738936	9.29715	7.16568	11.6341	4.20239	0.146004	3.83308	3.72301	20.246	7.23973	6.1158	14.3341	0	14.3275	0.789493	0
IAPEz-int_dup2911	24.6678	-3.77679	1.28849	-2.93116	0.00337694	0.0323346	Down	IAPEz-int	ERVK	LTR	IAPEz-int:ERVK:LTR	8cWT-2cWT:8cKO-2cKO	2cWT-2cKO	0	0	0	0	0	1.17156	22.288	157.662	8.66229	218.349	0	12.1437	0	138.539	2.44291	0.109294	2.3817	0	11.4792	2.694	0	0.581072	1.09307	1.25774	0.420239	4.52612	22.9985	2.0047	17.075	55.5046	49.9457	64.5033	2.70584	4.09357	53.6856	54.3905
IAPEz-int_dup3087	94.0867	-4.8765	1.31459	-3.70951	0.000207658	0.00365151	Down	IAPEz-int	ERVK	LTR	IAPEz-int:ERVK:LTR	8cWT-2cWT:8cKO-2cKO	2cWT-2cKO	0	0	0.832132	0	0	0	234.024	105.108	43.3115	174.679	1400.76	376.454	80.7971	11.5449	0.732873	0.98365	0.091604	21.4701	31.938	0.414461	0	1.16214	18.7036	5.26679	0.14008	33.2889	8.76131	11.885	12.6843	255.804	434.222	16.1258	59.5286	97.2222	38.6852	0
IAPEz-int_dup3469	60.9184	-3.41881	1.12497	-3.03903	0.00237344	0.0250213	Down	IAPEz-int	ERVK	LTR	IAPEz-int:ERVK:LTR	8cWT-2cWT	2cWT-2cKO	7.00108	4.60189	0	2.77932	0	0	66.864	819.843	303.18	0	36.8621	12.1437	0	80.8144	0.488582	3.16954	22.0766	0.210491	1.29603	39.2357	0.246312	95.2958	31.9419	14.071	25.0742	43.3631	51.7465	25.9179	43.9071	226.845	60.1387	116.464	5.41169	106.433	3.15797	3.39941
IAPEz-int_dup3483	8.59727	-3.62482	1.17101	-3.09545	0.00196515	0.0218529	Down	IAPEz-int	ERVK	LTR	IAPEz-int:ERVK:LTR	8cWT-2cWT	2cWT-2cKO	0	1.02264	1.66426	0	0	0	0	42.0432	86.6229	0	0	0	0	34.6347	2.93149	8.19709	1.09925	1.05245	0.833165	3.52292	0	12.7836	14.0885	17.7656	1.96111	19.2725	0.547582	5.15494	33.4181	2.41324	3.0579	2.68764	1.35292	1.02339	18.9478	0
IAPEz-int_dup351	9.18036	-3.6461	1.27451	-2.8608	0.00422579	0.038227	Down	IAPEz-int	ERVK	LTR	IAPEz-int:ERVK:LTR	8cKO-2cKO	2cWT-2cKO	0	1.02264	0	0	0	0	0	10.5108	0	4148.62	0	0	0	0	0.366436	1.20224	0.366416	0.210491	8.8871	4.21369	0.738936	0.871608	5.70825	0.157218	22.1326	1.31403	23.8198	6.15729	0.487856	4.82649	113.142	17.9176	17.588	3.07018	47.3696	47.5917
IAPEz-int_dup3764	15.7581	-4.49261	1.4695	-3.05723	0.00223393	0.0239755	Down	IAPEz-int	ERVK	LTR	IAPEz-int:ERVK:LTR	8cWT-2cWT:8cKO-2cKO	2cWT-2cKO	0	0	0	0	0	0	11.144	10.5108	0	0	0	60.7185	16.1594	11.5449	35.5443	2.29518	8.06115	0.210491	0.648017	0.0690769	0.246312	1.45268	0.242904	0.157218	0	16.6444	0.273791	12.1714	0.975712	9.65297	198.763	20.6052	1.35292	158.626	1.57899	3.39941
IAPEz-int_dup3796	61.3292	-3.9888	1.42249	-2.80409	0.00504586	0.0435066	Down	IAPEz-int	ERVK	LTR	IAPEz-int:ERVK:LTR	8cWT-2cWT:8cKO-2cKO	2cWT-2cKO	1.16685	0.511321	0.832132	0	0	0	0	0	8.66229	0	110.586	0	500.942	0	0.366436	7.8692	1.64887	0.210491	0.740591	3.45385	0	0.581072	8.3802	1.57218	0.420239	8.03021	35.8666	21.4789	48.7856	851.875	86.6405	311.766	9.47045	33.7719	153.951	0
IAPEz-int_dup3863	32.1663	-4.72698	1.20815	-3.91257	9.132e-05	0.00181501	Down	IAPEz-int	ERVK	LTR	IAPEz-int:ERVK:LTR	8cWT-2cWT:8cKO-2cKO	2cWT-2cKO	0	0	0	0	0	0	22.288	21.0216	0	87.3395	0	157.868	80.7971	115.449	0.732873	0.765061	3.11454	15.7868	4.44355	3.93738	0.985248	0.290536	20.404	10.7694	1.54088	6.86218	1.91654	12.1714	9.26927	4.82649	213.034	44.794	12.1763	9.21053	29.2113	299.148
IAPEz-int_dup3959	60.1152	-3.90955	1.41647	-2.76006	0.00577908	0.0477081	Down	IAPEz-int	ERVK	LTR	IAPEz-int:ERVK:LTR	8cWT-2cWT:8cKO-2cKO	2cWT-2cKO	1.16685	0	0	0	0	0	0	0	389.803	567.706	958.416	12.1437	0	0	2.44291	0.327883	0.641228	0	9.62769	2.83215	0.246312	4.64858	17.2462	0.628871	0.560318	4.81813	17.2488	12.3146	2.19535	7.23973	57.0808	49.2734	2.70584	2.04678	96.3182	0
IAPEz-int_dup3985	14.1232	-4.41885	1.37373	-3.21669	0.00129678	0.015973	Down	IAPEz-int	ERVK	LTR	IAPEz-int:ERVK:LTR	8cKO-2cKO	2cWT-2cKO:8cWT-8cKO	0	0	0	0	0	0	0	0	0	0	0	0	0	0	5.13011	0	1.37406	0.841964	0.0925739	7.39123	12.8082	6.97286	0.121452	3.85183	5.18295	6.42417	13.6896	0.572771	10.9768	159.274	152.895	34.0434	71.7049	27.6316	1.57899	0
IAPEz-int_dup4148	6.53249	-4.29229	1.34718	-3.18613	0.00144192	0.0172892	Down	IAPEz-int	ERVK	LTR	IAPEz-int:ERVK:LTR	8cWT-2cWT	2cWT-2cKO	0	0	0	0	0	0	22.288	73.5756	0	0	0	0	0	11.5449	1.09931	0.218589	0.732832	0.420982	1.29603	1.38154	0.492624	4.35804	26.598	1.25774	0	16.9364	3.83308	9.45072	0.731784	12.0662	14.2702	33.1475	1.35292	3.07018	1.57899	0
IAPEz-int_dup4157	18.5031	-5.33977	1.22233	-4.3685	1.251e-05	0.000313594	Down	IAPEz-int	ERVK	LTR	IAPEz-int:ERVK:LTR	8cWT-2cWT:8cKO-2cKO	2cWT-2cKO	0	0	0	0	0	0	33.432	10.5108	0	43.6697	0	0	16.1594	11.5449	0.610727	3.27883	10.3513	3.99933	17.7742	10.2234	0	14.8173	0.971617	23.9757	5.60318	8.17621	2.19033	23.9132	16.3432	168.927	7.1351	201.573	1.35292	5.11696	31.5797	6.79881
IAPEz-int_dup4184	14.1255	-3.97105	1.30479	-3.04343	0.00233897	0.0247751	Down	IAPEz-int	ERVK	LTR	IAPEz-int:ERVK:LTR	8cWT-2cWT:8cKO-2cKO	2cWT-2cKO	0	1.02264	0.832132	0	0	0	0	10.5108	0	0	0	0	16.1594	23.0898	1.95433	0.218589	5.03822	0.841964	0.370296	36.6108	1.72418	20.047	2.7934	10.2192	30.5374	1.60604	0	2.29108	9.26927	4.82649	239.535	13.4382	4.05877	66.5205	0.789493	0
IAPEz-int_dup4484	15.7791	-4.18237	1.30404	-3.20725	0.00134011	0.0163824	Down	IAPEz-int	ERVK	LTR	IAPEz-int:ERVK:LTR	8cWT-2cWT	2cWT-2cKO	0	0.511321	0	2.77932	0	1.17156	0	63.0648	173.246	0	0	12.1437	0	0	2.6872	4.0439	2.01529	0.210491	3.42523	0.138154	73.1546	12.2025	0.364356	13.7566	0.14008	49.4953	1.09516	1.43193	5.85427	16.8927	23.4439	23.2929	0	47.076	5.52645	3.39941
IAPEz-int_dup4503	11.2599	-4.06047	1.15381	-3.51918	0.000432881	0.00672741	Down	IAPEz-int	ERVK	LTR	IAPEz-int:ERVK:LTR	8cWT-2cWT:8cKO-2cKO	2cWT-2cKO	0	0	0	0	0	0	22.288	10.5108	17.3246	4061.28	73.7243	0	0	46.1796	0.122145	1.42083	4.03058	1.68393	5.83216	8.28923	0.246312	0.290536	5.46535	5.26679	0.840478	5.54815	3.55928	2.29108	13.66	41.0251	49.9457	25.9805	6.76461	60.3801	3.94747	0
IAPEz-int_dup4629	24.9512	-4.38263	1.42107	-3.08404	0.0020421	0.0225681	Down	IAPEz-int	ERVK	LTR	IAPEz-int:ERVK:LTR	8cWT-2cWT:8cKO-2cKO	2cWT-2cKO	0	0.511321	0	0	0	0	0	189.194	0	43.6697	0	0	48.4783	0	6.59585	4.37178	14.8398	0.420982	4.35097	15.3351	0	1.74322	0	3.22296	0.14008	15.1844	6.0234	17.8991	10.0011	106.183	91.737	104.818	224.585	2.04678	11.8424	0
IAPEz-int_dup4741	50.3743	-3.76042	1.29008	-2.91488	0.00355828	0.0336022	Down	IAPEz-int	ERVK	LTR	IAPEz-int:ERVK:LTR	8cWT-2cWT:8cKO-2cKO	2cWT-2cKO	0	0	0	0	0	0	0	924.951	8.66229	87.3395	36.8621	0	16.1594	11.5449	0.244291	6.44837	2.65652	0.210491	1.48118	0.0690769	9.60617	8.13501	2.18614	6.83897	0.840478	2.48207	0.821373	1.14554	4.63463	19.3059	226.285	107.505	2.70584	137.135	82.8968	3.39941
IAPEz-int_dup4768	33.0736	-4.8818	1.14465	-4.26488	2.00006e-05	0.00047281	Down	IAPEz-int	ERVK	LTR	IAPEz-int:ERVK:LTR	8cWT-2cWT:8cKO-2cKO	2cWT-2cKO:8cWT-8cKO	0	0.511321	0	0	0	0	11.144	10.5108	43.3115	0	0	24.2874	16.1594	11.5449	17.2225	8.63426	3.66416	0.420982	2.96237	13.8154	23.8923	0.871608	3.76502	16.4293	0.420239	29.0548	18.8916	0.286386	1.95142	207.539	269.095	93.1714	142.057	76.7544	167.373	3.39941
IAPEz-int_dup487	62.9864	-3.37319	1.2085	-2.79122	0.00525105	0.0445865	Down	IAPEz-int	ERVK	LTR	IAPEz-int:ERVK:LTR	8cWT-2cWT:8cKO-2cKO	2cWT-2cKO	1.16685	0	1.66426	0	2.6429	0	245.168	283.792	580.374	0	0	315.736	0	0	0.855018	6.55767	5.95426	0	1.57376	0.483538	0.492624	26.4388	9.23036	0.70748	0.280159	40.8811	12.8682	12.7442	12.1964	55.5046	192.648	358.352	51.411	18.4211	45.7906	37.3935
IAPEz-int_dup4952	27.4937	-3.76134	1.28297	-2.93173	0.00337078	0.032293	Down	IAPEz-int	ERVK	LTR	IAPEz-int:ERVK:LTR	8cWT-2cWT:8cKO-2cKO	2cWT-2cKO	4.66739	0	0	0	0	1.17156	11.144	84.0864	8.66229	0	0	48.5748	0	0	5.49655	1.20224	16.3055	0	15.8301	0.414461	17.7345	0.290536	20.1611	32.8585	0	37.377	47.9134	1.28874	18.7825	176.167	314.964	26.8764	0	63.4503	35.5272	3.39941
IAPEz-int_dup4964	16.0306	-3.71702	1.35515	-2.74288	0.00609024	0.0494419	Down	IAPEz-int	ERVK	LTR	IAPEz-int:ERVK:LTR	8cWT-2cWT:8cKO-2cKO	2cWT-2cKO	0	0	0	0	0	0	0	10.5108	8.66229	349.358	0	12.1437	0	11.5449	0.366436	0.218589	2.01529	0	6.7579	0.207231	19.705	0.871608	1.82178	0.70748	0	9.49025	0.547582	1.71831	1.95142	14.4795	28.5404	21.5011	8.11753	20.4678	56.8435	0
IAPEz-int_dup5030	35.0614	-3.85625	1.33866	-2.88067	0.00396833	0.0363267	Down	IAPEz-int	ERVK	LTR	IAPEz-int:ERVK:LTR	8cWT-2cWT:8cKO-2cKO	2cWT-2cKO	0	0.511321	0	0	0	0	11.144	168.173	0	131.009	294.897	0	0	103.904	0.488582	2.62307	0.641228	0.420982	7.86878	8.91092	0	13.3647	0.850165	3.5374	1.12064	2.33606	4.38066	13.4601	9.75712	342.68	113.142	24.1887	1.35292	2.04678	2.36848	0
IAPEz-int_dup5045	144.716	-4.59514	1.23827	-3.71094	0.000206494	0.0036418	Down	IAPEz-int	ERVK	LTR	IAPEz-int:ERVK:LTR	8cWT-2cWT:8cKO-2cKO	2cWT-2cKO	2.33369	0	0	0	0	0	66.864	10.5108	17.3246	3056.88	0	24.2874	48.4783	46.1796	24.9177	17.7057	0.641228	9.68258	12.3123	14.8515	0.246312	10.1688	35.2211	9.11863	8.12462	14.3084	1.09516	17.3263	0.975712	31.3722	810.343	547.382	97.4104	232.31	94.7392	27.1952
IAPEz-int_dup5046	33.0717	-4.94984	1.71814	-2.88093	0.00396499	0.0363267	Down	IAPEz-int	ERVK	LTR	IAPEz-int:ERVK:LTR	8cWT-2cWT:8cKO-2cKO	2cWT-2cKO	0	0	0	0	2.6429	0	11.144	0	0	43.6697	0	0	0	219.353	0	2.51377	0.91604	0	1.38861	0	24.1386	52.587	2.18614	2.82992	3.64207	5.54815	15.0585	29.3545	16.831	453.69	133.528	0	79.8224	122.807	0	0
IAPEz-int_dup5048	10.2352	-5.6965	1.60269	-3.55434	0.000378933	0.00603857	Down	IAPEz-int	ERVK	LTR	IAPEz-int:ERVK:LTR	8cWT-2cWT	2cWT-2cKO	0	0	0	0	0	0	0	0	0	0	36.8621	12.1437	0	11.5449	0	0.437178	0.274812	39.5723	9.99798	0	25.6164	0.581072	20.5254	0.235827	25.7746	6.86218	3.55928	32.0752	16.831	0	123.335	6.27115	5.41169	0	0.789493	0
IAPEz-int_dup5060	7.29165	-3.8129	1.38996	-2.74317	0.00608484	0.0494419	Down	IAPEz-int	ERVK	LTR	IAPEz-int:ERVK:LTR	8cKO-2cKO	2cWT-2cKO	0	0	0	0	0	0	0	0	0	0	0	0	0	0	1.46575	1.63942	1.00764	0	5.83216	4.14461	2.70943	0.581072	0	0.864698	3.08175	16.9364	10.6779	0	0.487856	2.41324	29.5597	0.895879	37.8818	27.6316	60.791	61.1893
IAPEz-int_dup5408	57.9905	-4.9073	1.23401	-3.97671	6.98739e-05	0.00145013	Down	IAPEz-int	ERVK	LTR	IAPEz-int:ERVK:LTR	8cWT-2cWT:8cKO-2cKO	2cWT-2cKO	0	0.511321	0	0	0	0	334.32	10.5108	25.9869	174.679	36.8621	72.8622	307.029	11.5449	15.0239	5.35543	13.0078	0.210491	9.62769	0.828923	0.492624	10.1688	4.85809	18.08	6.44366	54.1674	5.47582	0.429578	0.243928	480.235	141.683	80.6291	54.1169	50.1462	215.532	0
IAPEz-int_dup5530	4.05545	-3.81171	1.30981	-2.91011	0.00361298	0.0339749	Down	IAPEz-int	ERVK	LTR	IAPEz-int:ERVK:LTR	8cWT-2cWT	2cWT-2cKO	0	0	0	0	0	0	11.144	10.5108	0	0	0	0	0	0	0.122145	21.6403	2.83972	0.420982	3.8881	2.07231	0.246312	1.74322	0.364356	7.15341	0.280159	0.292008	0.547582	0.715964	6.82999	4.82649	56.0615	5.37527	4.05877	1.02339	7.89493	0
IAPEz-int_dup5580	16.8284	-4.41872	1.25787	-3.51286	0.000443315	0.00685639	Down	IAPEz-int	ERVK	LTR	IAPEz-int:ERVK:LTR	8cWT-2cWT:8cKO-2cKO	2cWT-2cKO	0	1.02264	0	0	0	0	0	10.5108	8.66229	131.009	0	12.1437	16.1594	0	3.66436	3.9346	9.34361	0	0.277722	19.2725	0.738936	3.1959	16.1531	10.455	4.90279	40.005	1.36896	11.7418	5.61035	2.41324	204.879	54.6486	1.35292	4.09357	37.1062	3.39941
IAPEz-int_dup5767	19.5875	-3.89704	1.27533	-3.0557	0.00224535	0.0240113	Down	IAPEz-int	ERVK	LTR	IAPEz-int:ERVK:LTR	8cWT-2cWT:8cKO-2cKO	2cWT-2cKO	0	0	0.832132	0	0	0	312.032	0	8.66229	0	0	0	16.1594	23.0898	11.726	2.62307	5.12982	0	0.833165	1.93415	0	0.290536	8.86601	9.11863	0.420239	3.6501	5.20203	23.77	0.975712	53.0913	45.8685	36.731	14.8821	103.363	7.10544	23.7958
IAPEz-int_dup5828	11.0044	-3.91756	1.31661	-2.9755	0.00292508	0.029044	Down	IAPEz-int	ERVK	LTR	IAPEz-int:ERVK:LTR	8cWT-2cWT	2cWT-2cKO	0	0	0	0	0	0	0	73.5756	34.6492	0	36.8621	97.1495	16.1594	0	17.3447	10.6016	2.3817	0	0.0925739	0.276308	0.985248	4.93911	0.485809	0.786089	2.38135	1.02203	9.85648	2.0047	0	16.8927	55.0422	7.16703	2.70584	5.11696	8.68443	0
IAPEz-int_dup6076	80.7556	-3.79809	1.35409	-2.8049	0.0050332	0.0434184	Down	IAPEz-int	ERVK	LTR	IAPEz-int:ERVK:LTR	8cWT-8cKO:8cWT-2cWT:8cKO-2cKO	2cWT-2cKO	0	1.02264	0	0	0	0	557.2	0	0	436.697	1621.93	12.1437	0	11.5449	0.122145	0	1.83208	1.26295	1.7589	3.52292	22.4144	0.581072	2.67195	7.70367	3.22183	8.90623	21.3557	4.58217	4.87856	14.4795	71.351	55.5445	27.0584	12.2807	3.94747	0
IAPEz-int_dup611	45.2342	-5.25578	1.22056	-4.30606	1.66187e-05	0.000402457	Down	IAPEz-int	ERVK	LTR	IAPEz-int:ERVK:LTR	8cWT-2cWT:8cKO-2cKO	2cWT-2cKO	0	0	0	2.77932	0	0	0	126.13	34.6492	0	36.8621	0	0	92.3593	14.5353	3.06025	24.2751	9.89307	2.4995	4.62815	0	1.45268	18.9465	1.41496	21.8524	36.939	13.142	4.72536	33.906	265.457	374.083	299.224	155.586	42.9825	38.6852	13.5976
IAPEz-int_dup731	12.3815	-5.27497	1.41845	-3.71884	0.000200143	0.00355085	Down	IAPEz-int	ERVK	LTR	IAPEz-int:ERVK:LTR	8cWT-2cWT	2cWT-2cKO	0	0	0	0	0	0	22.288	21.0216	17.3246	131.009	0	0	16.1594	0	21.864	0.437178	4.12218	0	13.5158	0.483538	0	12.2025	0.607261	8.80419	0.280159	1.75205	26.5577	30.9296	14.6357	2.41324	30.579	70.7744	0	0	2.36848	3.39941
IAPEz-int_dup908	78.2279	-4.12057	1.45336	-2.8352	0.00457968	0.0405246	Down	IAPEz-int	ERVK	LTR	IAPEz-int:ERVK:LTR	8cWT-2cWT:8cKO-2cKO	2cWT-2cKO	0	0.511321	0	0	0	0	0	73.5756	0	262.018	1437.62	12.1437	16.1594	173.174	3.05364	0.218589	10.5345	0.210491	8.60937	10.4306	0	0.290536	3.64356	1.17913	3.92223	3.7961	26.5577	7.73241	3.41499	161.687	271.134	338.642	0	0	16.5794	47.5917
IAPEz-int_dup992	133.246	-5.05901	1.08597	-4.65852	3.18484e-06	9.13876e-05	Down	IAPEz-int	ERVK	LTR	IAPEz-int:ERVK:LTR	8cWT-2cWT:8cKO-2cKO	2cWT-2cKO	0	0.511321	0.832132	0	0	0	0	42.0432	86.6229	1397.43	294.897	85.0059	113.116	126.994	10.3824	1.42083	13.2826	4.42031	14.2564	2.694	23.3996	3.48643	31.0918	6.60315	7.42422	40.7351	24.0936	9.59392	26.1003	991.843	519.843	51.961	78.4695	99.269	43.4221	645.887
IAPLTR3-int_dup187	23.7641	-3.26167	1.00192	-3.25541	0.00113227	0.0144866	Down	IAPLTR3-int	ERVK	LTR	IAPLTR3-int:ERVK:LTR	NA	2cWT-2cKO:8cKO-2cKO	2.33369	4.60189	0.832132	0	0	19.9166	11.144	0	0	43.6697	0	24.2874	0	0	10.3824	1.31153	2.56491	34.5205	19.8108	15.266	6.1578	32.2495	22.9545	135.129	35.3001	261.347	62.4244	43.3874	7.8057	0	5.0965	4.4794	0	1.02339	23.6848	47.5917
MLTR18C_MM_dup76	72.5226	-19.7694	2.74083	-7.2129	5.47738e-13	5.68374e-11	Down	MLTR18C_MM	ERVK	LTR	MLTR18C_MM:ERVK:LTR	8cWT-2cWT	2cWT-2cKO	0	0	0	0	0	0	0	10.5108	0	0	0	1214.37	759.493	519.521	0	15.5198	0.549624	21.8911	5.64701	0	25.3701	0	0	0	0	0	5.47582	0	0	0	104.988	0	0	0	0	0
MLTR25A_dup1496	4.62465	-5.49757	1.6383	-3.35565	0.000791787	0.0108623	Down	MLTR25A	ERVK	LTR	MLTR25A:ERVK:LTR	NA	2cWT-2cKO:8cKO-2cKO	0	0	0	0	0	0	0	0	0	0	0	0	0	11.5449	29.0706	6.33908	1.64887	44.6241	14.8118	1.31246	0.246312	0	12.2667	0.157218	0	29.6388	0	9.8803	8.78141	320.961	0	0	0	0	0.789493	0
MMERVK10C-int_dup1335	2.85905	-4.88724	1.73186	-2.82195	0.00477321	0.0418224	Down	MMERVK10C-int	ERVK	LTR	MMERVK10C-int:ERVK:LTR	NA	2cWT-2cKO:8cKO-2cKO	0	0	0	0	0	0	0	0	0	0	0	0	0	0	34.2007	19.0172	0	0.210491	0	0.138154	5.41886	0.290536	9.35182	2.6727	0.14008	1.46004	0	17.8991	13.1721	0	0	0	0	1.02339	0.789493	0
MMERVK10C-int_dup2394	92.5014	-17.2256	1.74683	-9.86103	6.14153e-23	3.91479e-20	Down	MMERVK10C-int	ERVK	LTR	MMERVK10C-int:ERVK:LTR	8cWT-2cWT:8cKO-2cKO	2cWT-2cKO	0	0	0	0	0	0	0	462.475	866.229	0	0	0	921.087	461.796	0	0.109294	0.824436	7.99866	0	0.0690769	0.246312	0	0	0.0786089	0	0.584015	0	0.143193	0.487856	24.1324	321.079	130.798	104.175	1.02339	119.214	0
MMERVK10C-int_dup2563	84.0487	-18.5893	1.64376	-11.309	1.18412e-29	2.11341e-26	Down	MMERVK10C-int	ERVK	LTR	MMERVK10C-int:ERVK:LTR	8cWT-8cKO:8cWT-2cWT	2cWT-2cKO	0	0	0	0	0	0	44.576	0	25.9869	0	0	2052.28	872.609	46.1796	0.122145	2.40448	5.67945	0	13.6084	0.0690769	0	4.0675	0.121452	0.0786089	0.560318	0	1.09516	1.57512	0.243928	0	5.0965	0.895879	0	0	14.2109	0
MMERVK10C-int_dup2579	77.4185	-14.8401	2.31852	-6.40067	1.54693e-10	9.79067e-09	Down	MMERVK10C-int	ERVK	LTR	MMERVK10C-int:ERVK:LTR	8cWT-2cWT:8cKO-2cKO	2cWT-2cKO	0	0	0	0	0	0	0	220.727	1117.44	0	0	1165.79	16.1594	34.6347	0	0	0.091604	0	0	0.345385	0	0	1.21452	0	0	0	0	0	0	0	185.513	114.673	0	0	7.89493	0
MMERVK10C-int_dup411	4.03557	-4.54534	1.41705	-3.20761	0.00133845	0.0163733	Down	MMERVK10C-int	ERVK	LTR	MMERVK10C-int:ERVK:LTR	NA	2cWT-2cKO	0	0	0.832132	0	0	0	0	0	0	0	0	0	0	0	16.1232	3.38813	3.57256	1.26295	15.3673	26.2492	10.0988	13.9457	0.850165	9.51167	0	4.38011	4.65445	8.16199	0	0	19.3667	0	1.35292	0	0	10.1982
MMERVK10C-int_dup527	73.9689	-5.67085	1.58044	-3.58814	0.000333051	0.00541868	Down	MMERVK10C-int	ERVK	LTR	MMERVK10C-int:ERVK:LTR	8cWT-8cKO:8cWT-2cWT	2cWT-2cKO	0	0	0	0	0	0	0	21.0216	8.66229	436.697	405.484	1542.25	0	0	18.444	3.82531	12.0917	0.841964	10.2757	0.276308	1.47787	25.2766	3.64356	0	37.4013	32.4128	0	6.30048	26.8321	0	0	0.895879	29.7643	14.3275	2.36848	0
MMERVK10C-int_dup536	54.398	-17.1919	1.85382	-9.27375	1.79714e-20	7.637e-18	Down	MMERVK10C-int	ERVK	LTR	MMERVK10C-int:ERVK:LTR	8cWT-2cWT:8cKO-2cKO	2cWT-2cKO	0	0	0	0	0	0	0	10.5108	129.934	0	0	1602.97	0	57.7245	0	6.22979	0	0	0.0925739	0	0	0	0.364356	0	2.66151	0.146004	0	0.859157	0.243928	14.4795	51.9843	6.27115	0	82.8948	8.68443	0
MMERVK9C_I-int_dup406	23.3421	-4.73908	1.27833	-3.70724	0.000209532	0.00367711	Down	MMERVK9C_I-int	ERVK	LTR	MMERVK9C_I-int:ERVK:LTR	8cKO-2cKO	2cWT-2cKO:8cWT-8cKO	0	0	0	0	0	0	0	0	0	0	0	0	0	0	0.366436	8.41568	3.11454	8.63013	5.73958	0.483538	0.492624	1.45268	6.19406	4.24488	0.840478	0.146004	28.2005	3.43663	22.4414	178.58	79.5054	301.911	0	85.9649	49.7381	64.5887
MMERVK9E_I-int_dup1544	64.2596	-15.5393	2.60108	-5.97417	2.31261e-09	1.22844e-07	Down	MMERVK9E_I-int	ERVK	LTR	MMERVK9E_I-int:ERVK:LTR	8cWT-2cWT:8cKO-2cKO	2cWT-2cKO	0	0	0	0	0	0	22.288	0	0	1222.75	0	412.886	307.029	80.8144	0	0	0	0	0	0	0	0	0	0	0	0	3.0117	0	0	4.82649	250.748	71.6703	0	0	1.57899	0
MMERVK9E_I-int_dup456	79.018	-18.0065	2.83478	-6.352	2.12538e-10	1.31259e-08	Down	MMERVK9E_I-int	ERVK	LTR	MMERVK9E_I-int:ERVK:LTR	8cWT-2cWT	2cWT-2cKO	0	0	0	0	0	0	0	336.346	0	0	0	1955.13	517.102	0	0	0.109294	5.49624	0	0.0925739	0	0.246312	0	0	0	0	13.2863	0	0	0	0	0	81.525	0	14.3275	0	0
MMERVK9E_I-int_dup61	8.13948	-5.55544	1.56376	-3.55261	0.000381432	0.00606971	Down	MMERVK9E_I-int	ERVK	LTR	MMERVK9E_I-int:ERVK:LTR	8cWT-2cWT	2cWT-2cKO	0	0	0	0	0	0	0	0	0	43.6697	36.8621	0	16.1594	0	2.07647	0.546472	12.0917	0.210491	3.79553	6.70046	30.5427	11.0404	63.398	22.0891	0	1.75205	9.03511	0.286386	1.7075	33.7854	0	0	5.41169	0	0	0
MMERVK9E_I-int_dup62	11.1331	-4.09392	1.37489	-2.97764	0.00290481	0.0289475	Down	MMERVK9E_I-int	ERVK	LTR	MMERVK9E_I-int:ERVK:LTR	NA	2cWT-2cKO	3.50054	0	0	2.77932	0	0	0	0	0	0	36.8621	0	16.1594	623.425	9.4052	0.109294	12.4581	4.6308	18.4222	8.56554	13.0545	0	17.6106	7.9395	35.7203	3.9421	102.672	0	9.02534	738.452	0	37.6269	0	62.4269	0.789493	3.39941
MMETn-int_dup446	26.8734	-3.75495	1.29404	-2.90173	0.00371113	0.0346479	Down	MMETn-int	ERVK	LTR	MMETn-int:ERVK:LTR	8cKO-2cKO	2cWT-2cKO:8cWT-8cKO	2.33369	0	1.66426	2.77932	0	0	0	0	0	0	0	0	0	0	3.17578	38.7995	6.8703	34.5205	38.6959	18.6508	3.94099	9.87822	20.1611	5.03097	2.24127	1.16803	30.117	0.286386	1.95142	168.927	1.0193	0	0	27.6316	161.846	0
MYSERV6-int_dup3043	31.9263	-5.47106	1.98537	-2.75569	0.0058568	0.0481937	Down	MYSERV6-int	ERVK	LTR	MYSERV6-int:ERVK:LTR	8cWT-2cWT	2cWT-2cKO	0	0	0	0	0	0	0	10.5108	0	0	2690.94	0	0	969.772	0	0	24.2751	19.1547	23.0509	1.45062	0	33.1211	9.35182	1.49357	25.0742	0	5.20203	13.7465	0	0	0	35.8352	0	159.649	1.57899	0
MYSERV6-int_dup3044	4.53458	-4.72599	1.40543	-3.36267	0.000771926	0.0106718	Down	MYSERV6-int	ERVK	LTR	MYSERV6-int:ERVK:LTR	NA	2cWT-2cKO:8cKO-2cKO	1.16685	0	0	0	0	0	0	0	0	0	0	0	32.3188	0	9.16091	0	8.79398	9.05111	5.64701	6.07877	0.246312	36.317	7.53003	32.7013	1.26072	0	9.3089	0.715964	6.58606	0	0	0.895879	0	0	0	0
RLTR10_dup1563	5.84983	-4.99986	1.54194	-3.24258	0.00118454	0.0149729	Down	RLTR10	ERVK	LTR	RLTR10:ERVK:LTR	NA	2cWT-2cKO	0	0	0	0	0	0	0	0	0	0	0	0	0	11.5449	0.855018	0	0.641228	0	6.94304	5.87154	1.72418	9.29715	36.5571	12.0272	4.76271	0.584015	2.19033	7.58922	23.4171	0	0	79.7332	2.70584	9.21053	0.789493	0
RLTR10_dup2693	5.79947	-4.7902	1.70179	-2.81481	0.00488067	0.042472	Down	RLTR10	ERVK	LTR	RLTR10:ERVK:LTR	NA	2cWT-2cKO	0	1.02264	0	0	0	0	0	31.5324	0	0	0	0	0	0	39.2087	1.42083	2.3817	0.420982	0.46287	0.345385	0	2.61482	26.1122	26.9628	11.6266	0.146004	0	22.4813	31.4667	0	0	0	0	16.3743	0	0
RLTR10-int_dup1031	7.51334	-4.54009	1.30903	-3.46828	0.000523807	0.00785622	Down	RLTR10-int	ERVK	LTR	RLTR10-int:ERVK:LTR	NA	2cWT-2cKO	0	0.511321	0	0	0	0	0	10.5108	0	0	0	0	0	0	16.7339	0.327883	0.183208	0	1.66633	3.93738	0.738936	9.29715	1.09307	8.8828	23.5334	17.6665	9.3089	15.8944	2.68321	2.41324	1.0193	89.5879	13.5292	2.04678	41.8432	0
RLTR10-int_dup1171	111.754	-20.3448	1.63272	-12.4607	1.22292e-35	5.45665e-32	Down	RLTR10-int	ERVK	LTR	RLTR10-int:ERVK:LTR	8cWT-8cKO:8cWT-2cWT	2cWT-2cKO	0	0	0	0	0	0	0	0	0	305.688	0	1493.67	16.1594	1997.27	1.71004	2.51377	1.28246	0	1.20346	8.22015	0.246312	15.9795	7.89439	6.13149	0	0	8.21373	47.9696	11.9525	2.41324	0	42.1063	54.1169	20.4678	80.5283	0
RLTR10-int_dup1189	2.01043	-4.34832	1.55701	-2.79274	0.00522631	0.0444709	Down	RLTR10-int	ERVK	LTR	RLTR10-int:ERVK:LTR	NA	2cWT-2cKO	0	0	0	0	0	0	0	0	0	0	0	0	0	0	0.244291	0	0.732832	0.210491	0.0925739	26.2492	4.92624	0.290536	5.46535	10.5336	0.420239	0.146004	5.74961	15.8944	0.487856	0	0	0.895879	0	2.04678	0	0
RLTR10-int_dup1244	15.9017	-20.8932	1.85857	-11.2415	2.54913e-29	4.13608e-26	Down	RLTR10-int	ERVK	LTR	RLTR10-int:ERVK:LTR	8cWT-2cWT	2cWT-2cKO	0	0	0	0	0	0	11.144	0	0	43.6697	0	24.2874	16.1594	0	0.122145	29.4002	8.33596	0	18.4222	16.3022	0	33.1211	0	17.5298	0	27.0107	8.21373	0.286386	0	0	307.828	0	0	1.02339	22.1058	3.39941
RLTR10-int_dup1342	22.0707	-5.73485	1.19216	-4.81047	1.50575e-06	4.57053e-05	Down	RLTR10-int	ERVK	LTR	RLTR10-int:ERVK:LTR	8cWT-2cWT	2cWT-2cKO:8cWT-8cKO	1.16685	0	0	0	2.6429	0	0	0	25.9869	0	0	0	0	0	17.5889	5.24614	8.06115	5.26227	10.0906	45.3835	22.907	80.4785	22.833	24.9976	7.28414	20.4405	18.8916	56.2748	41.7117	50.6781	0	24.1887	8.11753	36.8421	0.789493	278.751
RLTR10-int_dup1462	2.39137	-4.32709	1.55404	-2.78442	0.00536243	0.045278	Down	RLTR10-int	ERVK	LTR	RLTR10-int:ERVK:LTR	NA	2cWT-2cKO	0	0	0	0	0	0	0	10.5108	0	0	0	0	0	0	0.122145	1.09294	1.09925	0	0	6.49323	0.246312	4.93911	0.607261	3.5374	0.14008	20.0025	0.547582	30.9296	0.731784	0	3.0579	0	0	1.02339	0	3.39941
RLTR10-int_dup1706	13.1565	-5.36183	1.54785	-3.46404	0.00053212	0.0079742	Down	RLTR10-int	ERVK	LTR	RLTR10-int:ERVK:LTR	NA	2cWT-2cKO	0	0	0	0	2.6429	0	0	0	0	0	0	0	0	0	7.57302	35.7393	5.58784	0.210491	0	0.0690769	0.246312	1.16214	0	14.3854	1.96111	32.2668	38.8783	46.6808	23.1732	2.41324	1.0193	17.9176	4.05877	16.3743	18.9478	0
RLTR10-int_dup1741	2.12749	-4.15484	1.46369	-2.83859	0.00453127	0.0402358	Down	RLTR10-int	ERVK	LTR	RLTR10-int:ERVK:LTR	NA	2cWT-2cKO	0	0	0	0	0	0	0	0	0	0	0	12.1437	0	0	3.29793	1.85801	2.65652	0	0.185148	0.276308	6.89673	0.581072	0.242904	4.55931	10.7861	0.438011	0	8.0188	22.9292	0	3.0579	0	0	0	0.789493	0
RLTR10-int_dup1842	8.27598	-4.97657	1.58727	-3.1353	0.00171681	0.0197179	Down	RLTR10-int	ERVK	LTR	RLTR10-int:ERVK:LTR	NA	2cWT-2cKO	0	0.511321	0	0	0	0	0	0	0	0	0	0	0	11.5449	0	0	5.31303	0	3.70296	29.1505	4.43362	1.16214	23.0759	5.81706	0.280159	22.9226	15.8799	39.2348	0	0	1.0193	63.6074	4.05877	67.5439	2.36848	0
RLTR10-int_dup1959	7.21243	-5.00738	1.77261	-2.82487	0.00473	0.0415604	Down	RLTR10-int	ERVK	LTR	RLTR10-int:ERVK:LTR	NA	2cWT-2cKO	0	0	0	0	0	0	0	0	0	0	0	0	16.1594	0	3.54222	7.43202	0.183208	0.631473	0	2.76308	0	40.9656	0.607261	10.5336	0.840478	27.7407	16.975	0	0.975712	0	40.772	83.3168	0	0	13.4214	0
RLTR10-int_dup2097	7.269	-4.52625	1.51285	-2.99186	0.00277281	0.0280233	Down	RLTR10-int	ERVK	LTR	RLTR10-int:ERVK:LTR	NA	2cWT-2cKO	0	0	0	0	0	1.17156	0	0	0	0	0	0	16.1594	0	1.22145	0.218589	2.56491	0.210491	0	0.0690769	0.246312	30.2157	4.85809	18.3945	1.82103	1.16803	22.4509	1.28874	31.9546	0	5.0965	62.7115	0	15.3509	0.789493	50.9911
RLTR10-int_dup2102	2.08653	-4.041	1.4705	-2.74805	0.00599503	0.0490148	Down	RLTR10-int	ERVK	LTR	RLTR10-int:ERVK:LTR	NA	2cWT-2cKO	0	0	0	0	0	0	0	0	8.66229	0	0	0	0	0	0.244291	0.655767	0.091604	0	0.0925739	2.07231	0	6.68233	0.971617	2.12244	0.560318	9.92826	10.1303	23.9132	0.487856	0	1.0193	2.68764	1.35292	0	5.52645	0
RLTR10-int_dup2107	13.5144	-5.08839	1.44289	-3.52653	0.000421044	0.00658615	Down	RLTR10-int	ERVK	LTR	RLTR10-int:ERVK:LTR	8cWT-2cWT	2cWT-2cKO	0	0	0	0	2.6429	0	0	10.5108	0	87.3395	36.8621	0	80.7971	0	6.35156	16.2849	26.5652	5.26227	5.92473	9.67077	0.985248	37.7697	12.631	0.235827	25.6346	8.03021	2.46412	8.16199	5.61035	0	0	105.714	0	0	0	0
RLTR10-int_dup2138	7.74026	-3.96481	1.33391	-2.97232	0.00295556	0.0292411	Down	RLTR10-int	ERVK	LTR	RLTR10-int:ERVK:LTR	NA	2cWT-2cKO	0	0.511321	0	0	0	4.68626	0	10.5108	0	0	0	1590.82	0	0	24.6734	6.55767	3.02293	0	0.277722	24.5223	9.11354	38.3508	0.364356	3.61601	0.14008	9.19824	53.6631	49.1151	6.58606	2.41324	227.304	0	17.588	18.4211	0	0
RLTR10-int_dup2167	2.80905	-4.56426	1.24757	-3.65851	0.000253681	0.00431477	Down	RLTR10-int	ERVK	LTR	RLTR10-int:ERVK:LTR	8cWT-8cKO:8cWT-2cWT	2cWT-2cKO:8cKO-2cKO	0	0	0	0	0	0	0	21.0216	0	0	0	0	0	0	17.1004	7.65061	8.06115	0	7.03562	7.184	0.246312	6.10126	9.83762	8.64698	0.560318	3.06608	1.64275	1.14554	4.63463	0	0	0	0	0	0	0
RLTR10-int_dup249	7.14217	-4.42592	1.26571	-3.49679	0.000470885	0.00717708	Down	RLTR10-int	ERVK	LTR	RLTR10-int:ERVK:LTR	8cWT-2cWT	2cWT-2cKO	0	0.511321	0	0	0	1.17156	0	10.5108	0	0	0	85.0059	0	461.796	3.90865	6.99485	10.5345	0	0.46287	15.5423	19.2123	4.35804	3.15776	24.526	1.82103	32.1208	0.821373	9.8803	8.29356	0	1.0193	9.85467	13.5292	1.02339	0	0
RLTR10-int_dup557	9.13853	-5.32976	1.86642	-2.85561	0.00429543	0.038661	Down	RLTR10-int	ERVK	LTR	RLTR10-int:ERVK:LTR	NA	2cWT-2cKO	0	0	0	0	0	0	0	0	0	0	0	0	0	0	0	0.437178	0	0.210491	0	2.76308	0	58.3977	18.8251	19.495	0	4.81813	15.6061	12.8874	8.04963	120.662	6.1158	39.4187	0	12.2807	18.1583	0
RLTR10-int_dup562	5.84294	-5.09014	1.24849	-4.07703	4.56141e-05	0.000996475	Down	RLTR10-int	ERVK	LTR	RLTR10-int:ERVK:LTR	NA	2cWT-2cKO	0	0	0	0	0	0	0	0	0	0	0	0	0	0	6.35156	0.874356	2.2901	0.210491	3.61038	22.1737	0.985248	5.81072	5.70825	7.62506	2.80159	6.42417	15.6061	26.0611	13.1721	2.41324	0	39.4187	0	6.14035	21.3163	27.1952
RLTR10-int_dup613	11.2101	-4.68768	1.57388	-2.97843	0.00289732	0.028889	Down	RLTR10-int	ERVK	LTR	RLTR10-int:ERVK:LTR	8cWT-2cWT	2cWT-2cKO	0	0.511321	0	2.77932	0	0	0	0	0	0	0	0	226.232	0	14.1689	0	0.183208	0.420982	7.49849	3.86831	0	0.290536	3.0363	27.1201	4.48255	0.292008	50.1038	47.1104	11.2207	328.201	3.0579	2.68764	0	1.02339	8.68443	0
RLTR10-int_dup66	8.47015	-5.13276	1.32561	-3.872	0.000107944	0.00210544	Down	RLTR10-int	ERVK	LTR	RLTR10-int:ERVK:LTR	8cWT-2cWT	2cWT-2cKO	0	0	0	0	0	0	11.144	0	0	0	0	0	0	11.5449	1.58789	7.10414	0.641228	5.05178	2.03663	19.6178	0	2.32429	1.21452	20.4383	10.9262	9.92826	29.2956	11.169	1.95142	2.41324	0	82.4209	0	31.7252	37.1062	0
RLTR10-int_dup801	2.27158	-4.21477	1.48765	-2.83318	0.0046088	0.0406515	Down	RLTR10-int	ERVK	LTR	RLTR10-int:ERVK:LTR	NA	2cWT-2cKO	0	0	0	0	0	0	0	0	0	0	0	0	0	11.5449	9.4052	4.59037	0.091604	0.631473	11.2014	0.207231	0.738936	6.68233	0	1.96522	0	5.54815	0.821373	21.6221	1.7075	0	0	0	2.70584	0	0	0
RLTR11A_dup1814	23.8065	-17.9938	2.8145	-6.39324	1.62409e-10	1.01708e-08	Down	RLTR11A	ERVK	LTR	RLTR11A:ERVK:LTR	8cWT-2cWT	2cWT-2cKO	0	0	0	0	0	0	11.144	178.684	181.908	131.009	0	24.2874	0	0	0	15.3012	0	0	2.86979	0	0	0	0	0	0	0	0	0	0	200.299	134.548	0	0	0	0.789493	0
RLTR11C_MM_dup855	12.9671	-19.3098	2.19206	-8.80897	1.26305e-18	3.63597e-16	Down	RLTR11C_MM	ERVK	LTR	RLTR11C_MM:ERVK:LTR	8cWT-2cWT	2cWT-2cKO	0	0	0	0	0	0	0	63.0648	0	0	0	0	113.116	92.3593	0.488582	0.765061	0	26.5219	5.92473	0.898	4.92624	0	0.121452	0.314435	10.0857	0.146004	0	0	0	0	161.049	0	0	0	0	0
RLTR19-int_dup1639	5.80736	-4.89973	1.24059	-3.94953	7.83052e-05	0.0015936	Down	RLTR19-int	ERVK	LTR	RLTR19-int:ERVK:LTR	NA	2cWT-2cKO:8cKO-2cKO	1.16685	0	0.832132	0	0	0	0	0	0	0	0	0	0	0	0.366436	27.8701	12.733	6.52522	21.1994	9.11815	33.7447	27.8915	44.8158	8.17532	10.7861	1.89805	2.73791	5.01175	0	0	0	0	0	0	0	0
RLTR22_Mur_dup972	101.845	-3.00421	1.01223	-2.96791	0.00299828	0.029549	Down	RLTR22_Mur	ERVK	LTR	RLTR22_Mur:ERVK:LTR	8cWT-2cWT:8cKO-2cKO	2cWT-2cKO	2.33369	4.60189	3.32853	2.77932	0	0	11.144	73.5756	883.554	917.064	147.449	279.305	32.3188	57.7245	182.363	5.57402	4.30539	0.420982	5.46186	13.2628	4.1873	3.1959	9.71617	4.32349	0.420239	4.52612	36.688	2.14789	1.46357	26.5457	121.297	149.612	110.94	162.719	56.054	424.926
RLTR26_Mus_dup406	21.619	-4.92145	1.41561	-3.47655	0.00050791	0.00764349	Down	RLTR26_Mus	ERVK	LTR	RLTR26_Mus:ERVK:LTR	8cKO-2cKO	2cWT-2cKO:8cWT-8cKO	0	0.511321	0	0	0	0	0	0	0	43.6697	0	0	0	0	0.732873	4.0439	4.30539	19.3652	24.995	20.654	0.492624	3.77697	10.5663	2.35827	1.26072	45.9912	0.547582	0.572771	5.85427	125.489	1.0193	0	148.821	0	101.055	0
RLTR31B2_dup499	232.331	-17.1856	2.03805	-8.43235	3.38786e-17	7.65399e-15	Down	RLTR31B2	ERVK	LTR	RLTR31B2:ERVK:LTR	8cWT-8cKO:8cWT-2cWT	2cWT-2cKO	0	0	0	0	0	0	222.88	21.0216	60.636	7773.21	0	327.88	0	126.994	0	0	0	6.10424	0	0.138154	0	0	0	3.14435	0	0	0.547582	0	0	0	2.0386	1.79176	0	18.4211	26.8428	0
RLTR31D_MM_dup5859	82.0233	-15.9633	1.92738	-8.28237	1.20749e-16	2.4215e-14	Down	RLTR31D_MM	ERVK	LTR	RLTR31D_MM:ERVK:LTR	8cWT-2cWT:8cKO-2cKO	2cWT-2cKO	0	0	0	0	0	0	1738.46	0	0	0	221.173	801.484	0	23.0898	2.56505	0.218589	0.091604	0	0	0	0	0	0	0	0	0.730019	0.273791	0	0	4.82649	42.8106	22.397	0	22.5146	0	44.1923
RLTR44-int_dup149	4.72888	-5.53173	1.87961	-2.94302	0.00325025	0.031391	Down	RLTR44-int	ERVK	LTR	RLTR44-int:ERVK:LTR	NA	2cWT-2cKO:8cKO-2cKO	0	0	0	0	0	0	0	0	8.66229	0	0	0	0	0	7.69516	0.218589	1.83208	0	5.46186	0.0690769	0	25.2766	14.2099	25.4693	0	0	44.6279	2.0047	35.8574	0	0	3.58352	0	0	0	0
RLTR44-int_dup150	10.0766	-4.86546	1.52616	-3.18804	0.00143242	0.0172351	Down	RLTR44-int	ERVK	LTR	RLTR44-int:ERVK:LTR	NA	2cWT-2cKO	1.16685	0	0.832132	0	0	0	0	0	0	43.6697	0	0	0	0	3.54222	26.1214	0.366416	2.10491	5.36929	13.3318	2.95574	36.8981	0	33.1729	13.0274	1.75205	29.2956	7.30283	36.1014	0	0	113.777	0	2.04678	0	0
RLTR45_dup1525	142.486	-13.6699	2.47114	-5.5318	3.16961e-08	1.35338e-06	Down	RLTR45	ERVK	LTR	RLTR45:ERVK:LTR	8cWT-2cWT:8cKO-2cKO	2cWT-2cKO	0	0	0	0	0	0	0	0	0	0	3391.32	910.777	16.1594	300.168	0	0	0	0	0	0	0.492624	0	0	0	0.280159	0	0	0	0	4.82649	545.325	46.5857	0	0	56.054	0
RLTR45_dup678	83.346	-12.3097	1.89495	-6.49605	8.24562e-11	5.47092e-09	Down	RLTR45	ERVK	LTR	RLTR45:ERVK:LTR	8cWT-2cWT:8cKO-2cKO	2cWT-2cKO	0	0	0	0	0	0	378.896	966.994	0	0	0	60.7185	0	1096.77	0.122145	0	0	0	0.0925739	0	0	0	0	0	0	0	0	0	0	0	109.065	130.798	213.762	45.0292	78.1598	3.39941
RLTR45-int_dup1189	207.567	-15.3065	2.16953	-7.05522	1.72323e-12	1.63597e-10	Down	RLTR45-int	ERVK	LTR	RLTR45-int:ERVK:LTR	8cWT-2cWT:8cKO-2cKO	2cWT-2cKO	0	0	0	0	0	0	0	84.0864	8.66229	0	4091.7	2902.34	129.275	11.5449	0	0	0	0	0	0	0.246312	0	0	0	0	7.00818	0	0	0	0	232.4	132.59	20.2938	3.07018	61.5805	0
RLTR45-int_dup1199	74.0859	-15.211	2.16761	-7.01739	2.26055e-12	2.09048e-10	Down	RLTR45-int	ERVK	LTR	RLTR45-int:ERVK:LTR	8cWT-2cWT:8cKO-2cKO	2cWT-2cKO	0	0	0	0	0	0	11.144	378.389	8.66229	0	0	1821.55	0	11.5449	0	0	0	0	0	0	0	0	0	2.04383	0	0	0.273791	0	0	154.448	90.7177	0.895879	1.35292	50.1462	210.005	0
RLTR45-int_dup1237	85.3704	-12.9084	1.91281	-6.74841	1.49475e-11	1.16499e-09	Down	RLTR45-int	ERVK	LTR	RLTR45-int:ERVK:LTR	8cWT-2cWT:8cKO-2cKO	2cWT-2cKO	0	0	0	0	0	0	0	0	718.97	43.6697	0	1190.08	0	0	0.122145	0.218589	0	0	0	0.0690769	0	0	0	0	0	0	0	0	0	164.101	91.737	192.614	1.35292	158.626	559.751	37.3935
RLTR45-int_dup1265	135.585	-13.46	1.90993	-7.04741	1.82285e-12	1.71232e-10	Down	RLTR45-int	ERVK	LTR	RLTR45-int:ERVK:LTR	8cWT-2cWT:8cKO-2cKO	2cWT-2cKO	0	0	0	0	0	0	746.648	157.662	0	0	0	3230.22	0	253.988	0	0	0	0	0	0	0	0	0	0	0	0.584015	0	0	0	142.381	287.442	79.7332	20.2938	34.7953	22.1058	40.7929
RLTR45-int_dup151	126.085	-19.0603	1.78632	-10.6701	1.40443e-26	1.47449e-23	Down	RLTR45-int	ERVK	LTR	RLTR45-int:ERVK:LTR	8cWT-2cWT:8cKO-2cKO	2cWT-2cKO	0	0	0	0	0	0	0	21.0216	0	0	0	24.2874	0	1650.92	0	0.109294	0	0.420982	0.185148	0.0690769	0	0.290536	0	0.157218	2.10119	3.21208	17.2488	18.4719	0.243928	960.471	861.308	259.805	423.465	226.17	181.583	13.5976
RLTR45-int_dup153	184.781	-13.1241	1.86577	-7.03415	2.00475e-12	1.87334e-10	Down	RLTR45-int	ERVK	LTR	RLTR45-int:ERVK:LTR	8cWT-2cWT:8cKO-2cKO	2cWT-2cKO	0	0	0	0	0	0	0	0	0	2882.2	36.8621	12.1437	0	1685.56	0	0.109294	0.091604	0	0	0	0	0.581072	0	0	0	0	0	0	0	142.381	355.736	765.977	125.822	178.07	573.172	78.1863
RLTR45-int_dup194	84.5801	-7.43694	2.13221	-3.48791	0.000486819	0.00735711	Down	RLTR45-int	ERVK	LTR	RLTR45-int:ERVK:LTR	8cWT-2cWT:8cKO-2cKO	2cWT-2cKO	0	0	0	0	0	0	0	21.0216	0	0	0	2550.18	0	0	0.122145	0	0	0	0.0925739	0	0	0	0	0	0	0	0	0	0	12.0662	61.158	113.777	0	116.667	129.477	101.982
RLTR45-int_dup196	196.814	-16.1083	2.11222	-7.62626	2.4166e-14	3.17143e-12	Down	RLTR45-int	ERVK	LTR	RLTR45-int:ERVK:LTR	8cWT-2cWT:8cKO-2cKO	2cWT-2cKO	0	0	0	0	0	0	0	0	0	0	1216.45	2246.58	1745.22	1604.74	0	3.9346	0	0	0	0	0	0	0	0.393044	0	0	0	0	0	2.41324	76.4475	63.6074	32.4701	27.6316	238.427	23.7958
RLTR45-int_dup234	50.8536	-11.4445	2.10424	-5.43876	5.36514e-08	2.19626e-06	Down	RLTR45-int	ERVK	LTR	RLTR45-int:ERVK:LTR	8cWT-2cWT:8cKO-2cKO	2cWT-2cKO	0	0	0	0	0	0	0	851.375	0	0	516.07	85.0059	177.754	0	0	0	0.091604	0	0	0	0	0	0	0	0	0	0	0	0	0	118.239	48.3775	54.1169	26.6082	3.94747	0
RLTR45-int_dup349	102.678	-11.5183	2.09373	-5.50132	3.76958e-08	1.58305e-06	Down	RLTR45-int	ERVK	LTR	RLTR45-int:ERVK:LTR	8cWT-8cKO:8cWT-2cWT:8cKO-2cKO	2cWT-2cKO	0	0	0	0	0	0	468.048	10.5108	0	0	0	2404.45	0	865.868	0	0.109294	0	0	0	0	0	0	0	0	0	0	0	0	0	2.41324	7.1351	18.8135	0	12.2807	9.47392	0
RLTR45-int_dup426	69.2998	-11.3942	1.57205	-7.248	4.22965e-13	4.54764e-11	Down	RLTR45-int	ERVK	LTR	RLTR45-int:ERVK:LTR	8cWT-2cWT:8cKO-2cKO	2cWT-2cKO	0	0	0	0	0	0	11.144	0	718.97	0	36.8621	789.34	0	57.7245	0.122145	0	0	0	0	0	0	0	0	0	0	0	0	0	0	26.5457	191.628	96.7549	54.1169	40.9357	277.902	37.3935
RMER16-int_dup1343	4.8684	-5.21596	1.80286	-2.89317	0.0038138	0.0352702	Down	RMER16-int	ERVK	LTR	RMER16-int:ERVK:LTR	NA	2cWT-2cKO	0	0	0	0	0	0	0	0	8.66229	0	0	0	0	0	0.244291	0	0.183208	0	18.7925	28.8051	0	18.5943	5.70825	14.9357	0.280159	32.7049	0	10.3099	0	0	14.2702	0	5.41169	3.07018	18.1583	0
RMER17A-int_dup173	8.29749	-5.20917	1.46385	-3.55854	0.000372925	0.00595346	Down	RMER17A-int	ERVK	LTR	RMER17A-int:ERVK:LTR	8cWT-2cWT	2cWT-2cKO	0	0.511321	0	0	0	0	0	0	25.9869	0	0	0	0	0	37.6208	4.91825	19.3284	1.26295	11.2014	40.5481	2.70943	1.45268	3.52211	4.32349	1.26072	16.2064	0	31.6456	1.46357	4.82649	4.0772	0	93.3516	0	0.789493	0
RMER17D2_dup606	50.6889	-17.8898	2.25592	-7.93015	2.18887e-15	3.45725e-13	Down	RMER17D2	ERVK	LTR	RMER17D2:ERVK:LTR	8cWT-2cWT:8cKO-2cKO	2cWT-2cKO	0	0	0	0	0	0	0	126.13	900.878	0	0	0	0	277.078	0	0	0	0	11.294	0	0	0	0	0.471653	0	0	4.65445	0.286386	0	120.662	82.5633	72.5662	0	8.18714	93.9497	176.769
RMER19B_dup206	102.738	-15.079	2.82444	-5.33875	9.35914e-08	3.62347e-06	Down	RMER19B	ERVK	LTR	RMER19B:ERVK:LTR	8cWT-2cWT	2cWT-2cKO	0	0	0	0	0	0	0	1997.05	337.829	0	0	0	1389.71	11.5449	0	5.24614	0.091604	26.9428	0	0	0	0	0	0	0	0	0	0	0	0	8.1544	9.85467	14.8821	0	0	0
RMER20C_Mm_dup355	6.47478	-5.3044	1.82656	-2.90404	0.00368381	0.0344775	Down	RMER20C_Mm	ERVK	LTR	RMER20C_Mm:ERVK:LTR	NA	2cWT-2cKO	0	0	0	0	2.6429	0	11.144	0	8.66229	0	0	0	0	0	21.7419	0	5.67945	26.5219	0	0.345385	7.14305	1.74322	6.92277	34.6665	0	65.9937	0	29.4977	0.487856	0	0	0	0	16.3743	0	0
RMER4B_dup3563	141.898	-12.293	2.34229	-5.24827	1.53533e-07	5.66169e-06	Down	RMER4B	ERVK	LTR	RMER4B:ERVK:LTR	8cWT-2cWT:8cKO-2cKO	2cWT-2cKO	0	0	0	0	0	0	0	0	1801.76	1921.47	479.208	279.305	16.1594	288.623	0	0.218589	0	0	0	0	0	0	0	0	0	0	0	0	0	289.589	0	0	167.762	6.14035	0	0
RMER6A_dup1686	24.9721	-4.44403	1.56137	-2.84624	0.00442394	0.0394896	Down	RMER6A	ERVK	LTR	RMER6A:ERVK:LTR	8cWT-2cWT	2cWT-2cKO	0	0	0	0	0	2.34313	0	336.346	181.908	0	0	12.1437	16.1594	11.5449	7.20658	6.77626	0	15.9973	5.64701	3.24661	1.72418	36.0265	0.728713	13.9924	0.280159	0	6.57099	66.5846	0	31.3722	2.0386	43.8981	120.41	1.02339	0	0
RMER6A_dup2961	88.4562	-16.6018	2.51243	-6.60787	3.89895e-11	2.7397e-09	Down	RMER6A	ERVK	LTR	RMER6A:ERVK:LTR	8cWT-2cWT:8cKO-2cKO	2cWT-2cKO	0	0	0	0	0	0	1638.17	0	0	87.3395	0	862.202	64.6377	11.5449	0	0.109294	0	0.210491	1.48118	0	0	0	0	0	0	4.81813	0	0	0	0	31.5983	0	0	3.07018	0	567.701
RMER6B_dup892	51.3274	-15.8959	2.02998	-7.83059	4.85597e-15	7.22244e-13	Down	RMER6B	ERVK	LTR	RMER6B:ERVK:LTR	8cWT-2cWT:8cKO-2cKO	2cWT-2cKO	0	0	0	0	0	0	0	1313.85	0	43.6697	0	72.8622	16.1594	0	0	7.8692	0	0	0	0.138154	0	0	0	0	0.14008	0	0	0	0.243928	26.5457	34.6562	43.0022	0	125.877	195.005	23.7958
RMER6D_dup1169	70.3538	-12.3613	2.12892	-5.80638	6.38382e-09	3.15619e-07	Down	RMER6D	ERVK	LTR	RMER6D:ERVK:LTR	8cWT-2cWT:8cKO-2cKO	2cWT-2cKO	0	0	0	0	0	0	312.032	0	0	0	0	303.592	727.174	1154.49	0	0.109294	0	0	0	0	0	0	0.121452	0	0	0	0	0	0	7.23973	0	27.7723	0	8.18714	62.37	0
SRV_MM-int_dup83	3.73666	-4.74997	1.71354	-2.77201	0.00557106	0.0465943	Down	SRV_MM-int	ERVK	LTR	SRV_MM-int:ERVK:LTR	NA	2cWT-2cKO:8cKO-2cKO	0	0	0	0	0	0	0	0	0	43.6697	0	0	0	0	13.9246	0.218589	0.732832	10.1036	22.0326	3.24661	32.2669	0	0	7.78228	0.700398	0.584015	0.273791	2.72066	0	0	0	0	0	0	0	0
LTR50_dup70	94.0203	-19.7448	2.32029	-8.50964	1.74471e-17	4.15193e-15	Down	LTR50	ERVL	LTR	LTR50:ERVL:LTR	8cWT-8cKO:8cWT-2cWT	2cWT-2cKO	0	0	0	0	0	0	0	241.749	2451.43	43.6697	663.518	0	0	0	7.08444	0	0	0	0.185148	0.345385	22.6607	0	0.121452	2.6727	0	3.21208	33.9501	0	0	0	8.1544	0	0	0	0	0
MER21C_dup1582	47.6899	-15.913	2.57176	-6.18758	6.10954e-10	3.58694e-08	Down	MER21C	ERVL	LTR	MER21C:ERVL:LTR	8cWT-2cWT:8cKO-2cKO	2cWT-2cKO	0	0	0	0	0	0	0	0	381.141	0	0	667.903	387.826	0	0.122145	0	0	0	0	0	0	0	0	0.550262	3.50199	0	0	0	0	0	0	5.37527	79.8224	0	51.3171	186.967
MERVL_2A-int_dup1740	9.26241	-2.54736	0.856621	-2.97373	0.00294204	0.0291396	Down	MERVL_2A-int	ERVL	LTR	MERVL_2A-int:ERVL:LTR	8cWT-2cWT	2cWT-2cKO	0	1.02264	1.66426	0	0	4.68626	0	0	0	0	0	0	64.6377	0	2.93149	6.66696	8.88559	14.7344	9.72026	7.46031	8.37461	4.0675	5.95116	5.58123	12.4671	10.9503	4.92824	2.86386	16.831	4.82649	15.2895	0	55.4698	33.7719	35.5272	3.39941
MERVL_2A-int_dup315	5.05522	-5.73405	1.50778	-3.80297	0.000142969	0.00267195	Down	MERVL_2A-int	ERVL	LTR	MERVL_2A-int:ERVL:LTR	NA	2cWT-2cKO:8cKO-2cKO	0	0	0	0	0	0	0	0	0	0	0	0	0	0	65.9585	23.0611	10.8093	13.2609	0.370296	14.7825	0.738936	8.42554	0.364356	7.78228	1.68096	0	2.19033	2.0047	35.6135	0	0	0	0	0	0	0
MERVL_2A-int_dup602	2.07912	-3.16827	1.06677	-2.96996	0.00297838	0.0293853	Down	MERVL_2A-int	ERVL	LTR	MERVL_2A-int:ERVL:LTR	8cWT-2cWT	2cWT-2cKO:8cKO-2cKO	0	0.511321	0	0	0	1.17156	11.144	0	0	0	0	0	0	0	4.51938	4.0439	0.824436	0.841964	3.05494	0.828923	7.88198	6.68233	5.46535	2.6727	1.96111	0.730019	0.547582	18.1855	1.21964	0	2.0386	0	0	1.02339	1.57899	0
MERVL-int_dup1080	6.79743	-1.25514	0.399753	-3.1398	0.00169062	0.0194546	Down	MERVL-int	ERVL	LTR	MERVL-int:ERVL:LTR	NA	2cWT-2cKO	2.33369	8.18114	4.99279	2.77932	0	2.34313	0	0	8.66229	0	0	0	16.1594	0	10.8709	14.4269	9.0688	5.89375	8.60937	9.04908	6.89673	8.42554	15.0601	12.5774	7.98454	11.0963	7.93994	12.4578	13.66	2.41324	4.0772	4.4794	4.05877	14.3275	5.52645	3.39941
MERVL-int_dup114	6.80757	-1.94042	0.485041	-4.00053	6.32002e-05	0.00133491	Down	MERVL-int	ERVL	LTR	MERVL-int:ERVL:LTR	NA	2cWT-2cKO:8cKO-2cKO	2.33369	2.55661	4.16066	2.77932	5.2858	2.34313	0	10.5108	0	0	0	0	0	1154.49	7.32873	11.148	11.2673	13.8924	27.1242	11.674	15.5177	14.8173	7.40858	8.64698	6.58374	12.4103	4.10687	11.4554	14.6357	4.82649	7.1351	5.37527	13.5292	3.07018	3.15797	125.778
MERVL-int_dup1341	3.27379	-3.27486	0.987316	-3.31693	0.00091013	0.0120863	Down	MERVL-int	ERVL	LTR	MERVL-int:ERVL:LTR	8cWT-8cKO:8cWT-2cWT	2cWT-2cKO:8cKO-2cKO	0	1.02264	0	2.77932	0	0	33.432	0	0	0	0	0	0	519.521	2.07647	4.26248	2.2901	8.41964	2.31435	9.80892	5.66517	0.290536	2.30759	7.46784	7.84446	1.16803	3.28549	13.0305	10.7328	0	0	0	1.35292	0	1.57899	0
MERVL-int_dup1437	23.5082	-2.43792	0.630073	-3.86927	0.000109162	0.00211774	Down	MERVL-int	ERVL	LTR	MERVL-int:ERVL:LTR	8cWT-8cKO:8cWT-2cWT	2cWT-2cKO	1.16685	2.55661	6.65706	0	5.2858	5.85782	0	21.0216	17.3246	0	0	0	32.3188	380.982	22.1083	28.963	21.8934	9.2616	17.3113	16.6475	23.3996	41.2561	20.0396	11.2411	17.3699	34.1649	7.93994	13.8897	16.831	9.65297	10.193	11.6464	16.2351	9.21053	11.0529	3.39941
MERVL-int_dup1491	22.994	-0.938889	0.336925	-2.78664	0.00532577	0.0450758	Down	MERVL-int	ERVL	LTR	MERVL-int:ERVL:LTR	NA	2cWT-2cKO:8cKO-2cKO	12.8353	23.0094	30.7889	13.8966	5.2858	17.5735	0	21.0216	8.66229	0	0	12.1437	48.4783	0	35.6665	47.2152	22.5346	62.3053	27.0316	40.2718	33.7447	19.1754	50.0383	27.1201	31.2378	45.8452	32.3073	26.3475	24.3928	2.41324	10.193	8.95879	31.1172	25.5848	12.6319	27.1952
MERVL-int_dup1833	4.18454	-3.22826	1.14237	-2.82593	0.00471431	0.0414487	Down	MERVL-int	ERVL	LTR	MERVL-int:ERVL:LTR	8cWT-2cWT	2cWT-2cKO	0	0.511321	1.66426	0	0	0	44.576	0	0	0	0	0	0	0	1.71004	2.18589	11.3589	0.841964	2.03663	2.55585	2.95574	0.290536	2.30759	2.27966	8.68494	1.75205	1.64275	35.655	2.68321	9.65297	0	9.85467	1.35292	5.11696	3.15797	0
MERVL-int_dup1919	91.0183	-0.946904	0.325643	-2.9078	0.00363979	0.0341526	Down	MERVL-int	ERVL	LTR	MERVL-int:ERVL:LTR	8cWT-2cWT	2cWT-2cKO	50.1744	33.7472	49.0958	19.4552	74.0012	29.2891	66.864	63.0648	95.2852	0	552.932	60.7185	48.4783	196.263	51.1789	101.097	101.68	97.0363	85.3531	46.2815	66.0116	76.7015	95.2185	126.796	80.8259	116.365	57.2223	48.3992	75.6177	41.0251	127.412	86.9003	87.9399	90.0585	172.11	105.382
MERVL-int_dup2342	9.56233	-4.90811	1.03772	-4.72969	2.24866e-06	6.64472e-05	Down	MERVL-int	ERVL	LTR	MERVL-int:ERVL:LTR	8cWT-2cWT	2cWT-2cKO	0	1.02264	0	0	0	0	0	0	0	43.6697	36.8621	24.2874	0	0	11.6038	12.241	20.0613	5.89375	3.51781	11.8122	3.94099	22.0807	16.2746	12.0272	29.2766	18.9805	1.64275	13.4601	5.12249	12.0662	1.0193	1.79176	2.70584	0	2.36848	3.39941
MERVL-int_dup2533	16.9843	-3.62275	0.90677	-3.99522	6.46332e-05	0.00135874	Down	MERVL-int	ERVL	LTR	MERVL-int:ERVL:LTR	8cWT-2cWT	2cWT-2cKO:8cKO-2cKO	0	0.511321	2.4964	0	2.6429	7.02939	22.288	0	0	0	0	0	0	138.539	24.1848	14.7548	28.4888	2.10491	76.1883	2.41769	20.6902	49.6817	10.9307	10.848	23.6735	20.2945	49.83	36.2278	26.1003	19.3059	0	3.58352	6.76461	0	7.10544	3.39941
MERVL-int_dup2562	10.4705	-2.27935	0.681757	-3.34335	0.000827737	0.0112005	Down	MERVL-int	ERVL	LTR	MERVL-int:ERVL:LTR	NA	2cWT-2cKO:8cKO-2cKO	1.16685	7.66982	4.99279	2.77932	2.6429	1.17156	0	10.5108	8.66229	0	0	12.1437	16.1594	11.5449	7.93945	22.7333	29.4965	18.1022	14.6267	18.5817	33.2521	17.4322	20.2825	17.294	4.34247	1.75205	16.4275	4.0094	40.736	0	2.0386	0.895879	1.35292	21.4912	1.57899	13.5976
MERVL-int_dup274	3.208	-4.57867	1.18296	-3.87053	0.000108597	0.00211368	Down	MERVL-int	ERVL	LTR	MERVL-int:ERVL:LTR	NA	2cWT-2cKO:8cKO-2cKO	0	0.511321	0	0	0	0	0	0	0	0	0	0	0	0	5.00796	7.32273	3.29774	3.78884	16.6633	1.45062	5.17255	0.871608	5.8297	5.89567	14.148	0	5.47582	5.29813	35.1256	0	0	0	0	2.04678	0.789493	0
MERVL-int_dup54	14.7205	-3.03721	0.816341	-3.72052	0.00019881	0.00353422	Down	MERVL-int	ERVL	LTR	MERVL-int:ERVL:LTR	8cWT-2cWT	2cWT-2cKO	1.16685	1.53396	0.832132	0	2.6429	2.34313	11.144	10.5108	0	0	0	0	0	150.084	10.8709	3.06025	9.98483	13.4714	17.8668	16.3022	23.3996	3.77697	27.3267	11.6341	5.4631	8.76023	11.2254	5.58452	7.07391	7.23973	17.3281	12.5423	1.35292	11.2573	12.6319	84.9851
MERVL-int_dup576	27.1118	-2.60019	0.756069	-3.43909	0.000583681	0.00860243	Down	MERVL-int	ERVL	LTR	MERVL-int:ERVL:LTR	NA	2cWT-2cKO	2.33369	16.3623	5.82493	8.33796	0	1.17156	22.288	0	0	0	0	24.2874	16.1594	23.0898	57.5305	20.9845	37.7408	18.5232	44.9909	29.5649	94.8301	5.81072	15.9102	54.5546	32.9187	40.005	3.55928	65.1527	18.2946	19.3059	16.3088	10.7505	1.35292	10.2339	27.6323	248.157
MERVL-int_dup586	14.0698	-3.8289	0.941364	-4.0674	4.75402e-05	0.00103224	Down	MERVL-int	ERVL	LTR	MERVL-int:ERVL:LTR	8cWT-8cKO	2cWT-2cKO:8cKO-2cKO	2.33369	2.55661	2.4964	0	2.6429	1.17156	0	0	0	0	36.8621	48.5748	0	0	3.29793	10.9294	26.0155	14.7344	27.9573	25.2131	5.17255	0.581072	9.47327	34.5093	18.3504	201.923	15.0585	9.73711	15.1235	0	1.0193	0	4.05877	0	0.789493	0
MERVL-int_dup73	42.6479	-1.45425	0.359669	-4.0433	5.27041e-05	0.00113196	Down	MERVL-int	ERVL	LTR	MERVL-int:ERVL:LTR	8cWT-2cWT	2cWT-2cKO:8cKO-2cKO	33.8386	25.0547	14.1462	16.6759	10.5716	22.2597	144.872	10.5108	8.66229	43.6697	0	133.581	32.3188	11.5449	25.5284	60.9863	65.4052	79.3551	70.4487	67.2809	30.789	56.364	76.6363	72.2416	29.4167	62.3436	59.9602	48.5424	55.6156	33.7854	46.8878	20.6052	25.7055	10.2339	32.3692	30.5947
MERVL-int_dup736	14.262	-2.71608	0.686115	-3.95864	7.53793e-05	0.00154818	Down	MERVL-int	ERVL	LTR	MERVL-int:ERVL:LTR	NA	2cWT-2cKO	1.16685	8.69246	1.66426	0	2.6429	0	11.144	21.0216	0	0	0	0	16.1594	0	13.0696	5.9019	17.2216	14.7344	29.4385	21.1375	29.0648	24.9861	12.7525	23.111	17.9302	12.9943	10.4041	22.9108	19.7582	26.5457	33.6369	32.2516	1.35292	1.02339	30.7902	0
MERVL-int_dup867	2.85708	-3.4759	1.16269	-2.98953	0.00279408	0.0281904	Down	MERVL-int	ERVL	LTR	MERVL-int:ERVL:LTR	8cWT-2cWT	2cWT-2cKO	0	0	0	0	0	1.17156	0	0	0	0	0	24.2874	0	11.5449	0.732873	0.655767	7.32832	7.36718	0.277722	13.8845	0.738936	0.871608	15.0601	1.17913	0.980557	0.876023	1.09516	3.43663	0.731784	0	4.0772	2.68764	1.35292	0	68.6859	0
MERVL-int_dup90	53.273	-2.75941	0.838465	-3.29102	0.00099825	0.013024	Down	MERVL-int	ERVL	LTR	MERVL-int:ERVL:LTR	8cWT-2cWT	2cWT-2cKO	2.33369	4.09057	5.82493	5.55864	5.2858	5.85782	858.088	0	8.66229	43.6697	0	0	64.6377	92.3593	51.9118	34.4278	27.8476	11.3665	49.8973	24.3151	47.0456	42.1277	28.4198	29.6355	18.0703	29.7848	1.64275	54.4133	34.8817	0	32.6176	162.154	78.4695	70.614	37.1062	3.39941
MERVL-int_dup902	6.36794	-3.18917	0.814943	-3.91336	9.10208e-05	0.00181108	Down	MERVL-int	ERVL	LTR	MERVL-int:ERVL:LTR	NA	2cWT-2cKO	1.16685	1.02264	0.832132	0	0	1.17156	0	0	0	0	36.8621	12.1437	0	0	10.5045	6.22979	2.1985	9.05111	3.98068	12.3648	7.38936	5.22965	10.8092	10.455	23.5334	5.54815	4.38066	2.43428	6.58606	9.65297	26.5018	0.895879	5.41169	6.14035	3.94747	0
MERVL-int_dup934	2.33857	-4.09896	1.19401	-3.43295	0.000597046	0.00876133	Down	MERVL-int	ERVL	LTR	MERVL-int:ERVL:LTR	8cWT-2cWT	2cWT-2cKO	0	0	0	0	0	0	11.144	10.5108	0	0	0	0	0	0	0.122145	8.96215	0.549624	1.47344	0.833165	8.91092	0.246312	0.290536	7.89439	8.41115	5.04287	1.46004	13.4158	36.5142	1.21964	359.573	1.0193	0.895879	0	2.04678	0.789493	0
MLT2D_dup568	122.393	-11.4073	2.20899	-5.16403	2.41685e-07	8.50807e-06	Down	MLT2D	ERVL	LTR	MLT2D:ERVL:LTR	8cWT-2cWT:8cKO-2cKO	2cWT-2cKO	0	0	0	0	0	0	0	1009.04	34.6492	2052.48	0	0	1276.59	0	0	0	0.091604	0	0	0	0	0	0	0	0	0	0	0	0	4.82649	79.5054	51.961	0	2.04678	17.3689	0
MT2_Mm_dup1009	5.10717	-4.01694	1.41572	-2.83738	0.00454859	0.0403095	Down	MT2_Mm	ERVL	LTR	MT2_Mm:ERVL:LTR	NA	2cWT-2cKO	0	0.511321	0	0	0	0	0	0	0	0	0	0	0	0	14.0467	0.437178	15.8475	1.05245	0.46287	17.3383	0.738936	4.64858	9.23036	1.808	2.80159	8.03021	0.273791	0.143193	0.731784	2.41324	0	0	0	12.2807	31.5797	64.5887
MT2_Mm_dup1017	6.50465	-5.37594	1.43079	-3.75732	0.000171741	0.00312141	Down	MT2_Mm	ERVL	LTR	MT2_Mm:ERVL:LTR	NA	2cWT-2cKO:8cKO-2cKO	0	0.511321	0	0	0	0	0	0	0	0	36.8621	0	0	0	50.3239	4.15319	2.65652	19.9966	13.1455	27.4926	1.23156	18.3038	0.607261	17.1367	0.980557	0	0	0.572771	42.9313	2.41324	0	0	1.35292	0	0	0
MT2_Mm_dup1161	4.17633	-4.46434	1.30729	-3.41495	0.000637932	0.00923423	Down	MT2_Mm	ERVL	LTR	MT2_Mm:ERVL:LTR	NA	2cWT-2cKO:8cKO-2cKO	0	0	0	0	0	1.17156	0	0	0	0	36.8621	0	0	0	9.03876	0.218589	5.12982	0.631473	1.29603	6.07877	4.92624	3.77697	22.1043	5.73845	0.840478	46.8672	0	3.57982	0.487856	0	0	0	1.35292	88.0117	0	3.39941
MT2_Mm_dup1196	5.40717	-2.99238	1.01712	-2.94201	0.00326085	0.0314593	Down	MT2_Mm	ERVL	LTR	MT2_Mm:ERVL:LTR	8cWT-2cWT	2cWT-2cKO	1.16685	0	0.832132	0	2.6429	0	0	0	8.66229	43.6697	0	0	16.1594	0	0.122145	6.88555	2.93133	4.6308	6.94304	7.39123	4.1873	10.1688	5.8297	10.9266	1.12064	2.04405	3.55928	4.86855	5.36642	0	6.1158	21.5011	0	1.02339	21.3163	0
MT2_Mm_dup1236	6.0679	-2.93494	0.942547	-3.11384	0.00184672	0.0208742	Down	MT2_Mm	ERVL	LTR	MT2_Mm:ERVL:LTR	NA	2cWT-2cKO:8cKO-2cKO	1.16685	1.02264	3.32853	0	2.6429	1.17156	11.144	0	0	0	0	886.49	0	11.5449	6.10727	13.8804	6.04586	31.1527	7.40591	8.28923	0.246312	11.0404	42.1439	9.66889	5.18295	0	20.2605	19.6174	2.43928	0	3.0579	42.1063	0	0	2.36848	0
MT2_Mm_dup1284	3.01275	-3.44114	1.23221	-2.79267	0.00522748	0.0444709	Down	MT2_Mm	ERVL	LTR	MT2_Mm:ERVL:LTR	8cWT-8cKO	2cWT-2cKO:8cKO-2cKO	0	1.02264	0	0	0	0	0	0	0	43.6697	0	0	0	0	0.732873	0.874356	1.19085	2.3154	4.6287	0.276308	3.69468	14.8173	1.45743	6.68175	20.4516	0.438011	0.273791	3.57982	5.36642	0	0	0	0	0	0	0
MT2_Mm_dup1344	3.3398	-4.67214	1.32065	-3.53776	0.000403539	0.00632897	Down	MT2_Mm	ERVL	LTR	MT2_Mm:ERVL:LTR	8cWT-2cWT	2cWT-2cKO:8cKO-2cKO	0	0	0	0	0	0	0	0	0	0	0	0	32.3188	0	12.7031	1.85801	1.55727	1.47344	1.01831	2.07231	3.69468	1.16214	0.364356	21.9319	11.7667	23.7986	0	0.429578	5.61035	0	0	0	0	1.02339	0.789493	0
MT2_Mm_dup1366	5.77939	-3.263	1.04227	-3.13067	0.00174407	0.0199539	Down	MT2_Mm	ERVL	LTR	MT2_Mm:ERVL:LTR	NA	2cWT-2cKO	2.33369	0.511321	1.66426	0	0	0	0	0	0	43.6697	0	12.1437	0	0	0.610727	1.74871	1.83208	16.2078	7.12819	3.73015	49.0161	19.1754	1.45743	9.59028	1.68096	1.31403	7.39236	2.57747	7.8057	0	2.0386	15.2299	1.35292	186.257	1.57899	0
MT2_Mm_dup168	4.51943	-4.52262	1.23417	-3.6645	0.000247826	0.00424899	Down	MT2_Mm	ERVL	LTR	MT2_Mm:ERVL:LTR	8cWT-2cWT	2cWT-2cKO:8cKO-2cKO	0	0	0	2.77932	0	0	11.144	0	0	0	0	0	32.3188	0	0.366436	18.9079	7.41992	5.05178	5.27671	1.65785	12.8082	3.77697	0.485809	0.70748	1.4008	1.02203	41.0687	1.43193	14.1478	0	0	0	0	2.04678	0	3.39941
MT2_Mm_dup170	6.31414	-4.57404	1.495	-3.05956	0.00221662	0.0239362	Down	MT2_Mm	ERVL	LTR	MT2_Mm:ERVL:LTR	8cWT-8cKO:8cWT-2cWT	2cWT-2cKO	0	0	0	0	0	0	133.728	0	0	0	0	0	0	0	0.122145	1.63942	6.22907	6.9462	7.40591	8.84184	0	22.3713	9.71617	2.04383	4.62263	0.292008	1.09516	10.7395	1.7075	0	0	0	0	0	2.36848	0
MT2_Mm_dup1908	2.28981	-3.47824	1.21633	-2.85962	0.00424152	0.0382917	Down	MT2_Mm	ERVL	LTR	MT2_Mm:ERVL:LTR	NA	2cWT-2cKO:8cKO-2cKO	0	0	1.66426	0	0	0	0	0	0	0	0	0	0	0	4.88582	0.874356	6.13747	5.68326	2.96237	11.6049	17.2418	4.64858	0.485809	3.45879	3.22183	1.16803	0	15.0352	0.487856	0	0	3.58352	0	0	1.57899	0
MT2_Mm_dup1928	3.51178	-3.15109	1.09857	-2.86836	0.00412604	0.0374981	Down	MT2_Mm	ERVL	LTR	MT2_Mm:ERVL:LTR	8cWT-2cWT	2cWT-2cKO	0	1.02264	0	0	0	1.17156	0	21.0216	0	0	0	0	0	11.5449	0.732873	0.327883	7.78634	9.47209	2.31435	14.7825	0.985248	2.90536	3.40066	7.31062	2.38135	3.7961	3.83308	10.1667	3.17107	0	1.0193	0	0	18.4211	2.36848	0
MT2_Mm_dup1938	4.33521	-4.92192	1.54923	-3.17702	0.00148798	0.0176932	Down	MT2_Mm	ERVL	LTR	MT2_Mm:ERVL:LTR	NA	2cWT-2cKO	0	0	0	0	0	0	0	0	0	0	0	0	0	0	6.84015	3.60672	14.0154	25.8904	5.18414	12.1575	0	2.32429	1.21452	1.25774	7.00398	3.9421	0.273791	20.3334	2.43928	0	0	0	0	1.02339	52.8961	0
MT2_Mm_dup1978	2.18603	-2.78848	0.954134	-2.92252	0.00347206	0.0329449	Down	MT2_Mm	ERVL	LTR	MT2_Mm:ERVL:LTR	NA	2cWT-2cKO:8cKO-2cKO	1.16685	0.511321	1.66426	0	0	0	0	0	0	0	0	0	0	0	2.93149	1.20224	4.4886	8.20915	2.96237	3.52292	5.41886	0.871608	18.3393	12.0272	1.4008	1.75205	1.36896	9.16434	2.19535	0	0	0.895879	0	0	0.789493	0
MT2_Mm_dup2046	4.68806	-4.43833	1.57486	-2.81824	0.00482875	0.0421348	Down	MT2_Mm	ERVL	LTR	MT2_Mm:ERVL:LTR	NA	2cWT-2cKO	0	0	0	0	0	1.17156	0	0	0	0	36.8621	0	0	0	27.6049	1.20224	1.55727	19.5757	7.86878	0.483538	0	0.290536	11.0521	8.96141	0	0.146004	1.09516	12.7442	17.075	0	0	24.1887	0	0	1.57899	0
MT2_Mm_dup2090	3.36221	-4.58398	1.1651	-3.93439	8.3408e-05	0.00168021	Down	MT2_Mm	ERVL	LTR	MT2_Mm:ERVL:LTR	NA	2cWT-2cKO:8cKO-2cKO	0	0.511321	0	0	0	0	0	0	0	0	0	0	0	0	11.3595	0.546472	1.46566	19.5757	4.2584	10.3615	9.85248	9.29715	10.3234	4.71653	10.646	0	0.547582	4.86855	18.0507	0	1.0193	0.895879	4.05877	2.04678	0	0
MT2_Mm_dup2140	4.2828	-4.30616	1.37495	-3.13186	0.00173703	0.0198989	Down	MT2_Mm	ERVL	LTR	MT2_Mm:ERVL:LTR	8cWT-8cKO:8cWT-2cWT	2cWT-2cKO	0	0	0	0	0	0	0	0	0	0	0	85.0059	0	0	2.19862	1.85801	3.75576	18.3127	5.27671	6.42415	3.69468	9.29715	12.7525	2.20105	0.420239	0.146004	0.821373	0	2.43928	0	0	0	0	3.07018	0.789493	0
MT2_Mm_dup2185	7.62568	-3.1564	0.829052	-3.80724	0.000140528	0.00263183	Down	MT2_Mm	ERVL	LTR	MT2_Mm:ERVL:LTR	NA	2cWT-2cKO:8cKO-2cKO	0	4.09057	0.832132	2.77932	2.6429	0	0	0	0	0	0	12.1437	16.1594	0	28.7042	9.29003	21.985	20.6281	12.4049	9.46354	45.3214	13.0741	10.5663	16.1148	2.24127	6.57017	4.38066	8.44837	19.7582	0	0	0.895879	0	1.02339	12.6319	0
MT2_Mm_dup2197	6.93725	-2.56229	0.877058	-2.92146	0.00348392	0.0330223	Down	MT2_Mm	ERVL	LTR	MT2_Mm:ERVL:LTR	NA	2cWT-2cKO	2.33369	3.06793	0.832132	2.77932	0	0	0	357.367	0	0	0	0	0	57.7245	2.6872	3.49742	8.51917	9.47209	8.23908	34.9529	7.14305	10.7498	6.43696	10.6908	21.5723	3.21208	6.29719	2.72066	3.65892	0	22.4246	5.37527	2.70584	0	15.0004	0
MT2_Mm_dup2256	2.73591	-3.01058	1.08579	-2.7727	0.00555926	0.0465392	Down	MT2_Mm	ERVL	LTR	MT2_Mm:ERVL:LTR	NA	2cWT-2cKO:8cKO-2cKO	3.50054	0.511321	0	0	0	0	0	0	0	0	0	0	0	0	21.1312	19.2358	1.83208	3.57835	0.925739	0.483538	0.738936	2.61482	7.53003	6.36732	1.68096	12.1183	13.9633	1.14554	1.95142	0	0	0.895879	0	1.02339	0	0
MT2_Mm_dup233	4.11634	-4.75481	1.3043	-3.6455	0.000266873	0.0044893	Down	MT2_Mm	ERVL	LTR	MT2_Mm:ERVL:LTR	NA	2cWT-2cKO	0	0.511321	0	0	0	0	0	0	0	0	0	0	0	0	0.244291	3.27883	13.4658	38.3094	19.1628	1.24338	5.66517	1.45268	6.43696	5.50262	2.52143	8.76023	4.92824	1.71831	17.3189	0	0	0	0	2.04678	19.7373	0
MT2_Mm_dup2372	1.99961	-2.85915	1.01728	-2.81059	0.00494507	0.0428861	Down	MT2_Mm	ERVL	LTR	MT2_Mm:ERVL:LTR	NA	2cWT-2cKO:8cKO-2cKO	0	0.511321	0.832132	0	2.6429	0	0	0	0	0	0	0	0	0	5.3744	1.20224	2.56491	1.47344	12.2198	2.62492	3.94099	4.0675	2.7934	1.88661	0.420239	3.9421	0.821373	2.0047	18.5385	2.41324	0	2.68764	0	1.02339	0	0
MT2_Mm_dup2429	9.89756	-4.468	1.51904	-2.94133	0.00326803	0.0315115	Down	MT2_Mm	ERVL	LTR	MT2_Mm:ERVL:LTR	NA	2cWT-2cKO	0	0.511321	0.832132	0	0	0	0	10.5108	0	0	0	0	0	0	0.244291	3.49742	20.2445	0.420982	13.3306	16.3712	8.12829	9.00662	16.5175	8.09671	34.8798	0.146004	8.76131	4.15259	0.487856	0	26.5018	0	0	0	0	183.568
MT2_Mm_dup2480	1.87861	-3.7578	1.3167	-2.85395	0.0043179	0.0387655	Down	MT2_Mm	ERVL	LTR	MT2_Mm:ERVL:LTR	NA	2cWT-2cKO:8cKO-2cKO	0	0	0.832132	0	0	0	0	0	0	0	0	0	0	0	0.488582	0.437178	5.03822	5.05178	4.35097	0.414461	8.37461	0.581072	0.728713	9.59028	25.6346	1.02203	2.73791	3.43663	0	0	0	0	0	0	0.789493	122.379
MT2_Mm_dup2511	3.87385	-4.96931	1.4831	-3.35063	0.00080629	0.0109936	Down	MT2_Mm	ERVL	LTR	MT2_Mm:ERVL:LTR	8cWT-2cWT	2cWT-2cKO	0	0	0	0	0	0	0	0	0	0	0	0	0	23.0898	0	5.57402	2.1985	33.4681	7.12819	0.759846	1.72418	14.2363	0.850165	4.08766	0.560318	0	28.2005	11.3122	0.243928	2.41324	0	0	0	5.11696	2.36848	0
MT2_Mm_dup2555	1.97053	-3.22633	1.06832	-3.02	0.00252775	0.0262298	Down	MT2_Mm	ERVL	LTR	MT2_Mm:ERVL:LTR	8cWT-2cWT	2cWT-2cKO:8cKO-2cKO	0	1.02264	0	0	0	0	0	10.5108	0	0	0	0	0	0	1.58789	3.49742	1.74048	3.78884	1.01831	1.51969	3.20206	1.45268	4.61518	16.5079	0.980557	0.584015	1.36896	13.3169	2.92714	0	1.0193	0.895879	1.35292	0	0	0
MT2_Mm_dup259	10.9854	-4.84467	1.5992	-3.02944	0.00245008	0.0256436	Down	MT2_Mm	ERVL	LTR	MT2_Mm:ERVL:LTR	8cWT-2cWT	2cWT-2cKO	0	0	0.832132	0	0	0	0	157.662	0	0	0	0	0	0	31.0249	8.74356	2.65652	27.3638	4.72127	0.138154	32.7595	2.32429	3.15776	12.263	0.280159	0.584015	0.273791	5.29813	13.9039	381.292	0	2.68764	98.7633	1.02339	0	0
MT2_Mm_dup2591	2.47457	-3.24284	1.00114	-3.23914	0.00119892	0.0151225	Down	MT2_Mm	ERVL	LTR	MT2_Mm:ERVL:LTR	8cWT-2cWT	2cWT-2cKO:8cKO-2cKO	0	0	0.832132	0	0	1.17156	0	10.5108	8.66229	0	0	0	0	0	1.09931	9.29003	0.549624	13.2609	1.57376	5.04261	11.084	1.74322	2.5505	2.6727	3.50199	0.876023	6.29719	1.28874	5.36642	0	1.0193	0	1.35292	1.02339	0.789493	115.58
MT2_Mm_dup2597	5.65051	-4.3452	1.16675	-3.7242	0.000195933	0.00349351	Down	MT2_Mm	ERVL	LTR	MT2_Mm:ERVL:LTR	NA	2cWT-2cKO	0	0	0.832132	2.77932	0	0	0	10.5108	0	0	0	0	0	0	0.977164	20.3288	10.4429	0.210491	6.66532	5.11169	2.70943	5.52018	25.6264	15.879	20.8719	7.5922	0.821373	20.4766	0.487856	2.41324	3.0579	8.06291	20.2938	17.3977	0	0
MT2_Mm_dup610	2.38856	-4.64162	1.6845	-2.75549	0.0058605	0.048202	Down	MT2_Mm	ERVL	LTR	MT2_Mm:ERVL:LTR	NA	2cWT-2cKO:8cKO-2cKO	0	0	0	0	0	0	0	0	0	0	0	0	0	0	22.2305	18.4708	0.366416	1.26295	13.3306	0.483538	0	0	0	12.656	2.66151	14.0164	0.273791	0.859157	0.975712	0	0	0	0	0	0.789493	0
MT2_Mm_dup624	2.75262	-4.06386	1.24616	-3.2611	0.00110982	0.0142607	Down	MT2_Mm	ERVL	LTR	MT2_Mm:ERVL:LTR	NA	2cWT-2cKO:8cKO-2cKO	0	0	0	0	0	1.17156	0	0	0	0	0	12.1437	0	0	2.56505	0.546472	6.7787	5.68326	0.46287	9.53261	5.17255	12.7836	0.242904	6.44593	20.5917	5.11013	0.273791	6.87325	0.731784	0	0	0	0	0	4.73696	0
MT2_Mm_dup836	7.41134	-3.6145	0.903443	-4.0008	6.31282e-05	0.00133491	Down	MT2_Mm	ERVL	LTR	MT2_Mm:ERVL:LTR	NA	2cWT-2cKO:8cKO-2cKO	2.33369	0	0.832132	0	2.6429	2.34313	0	0	0	0	0	0	16.1594	0	20.7647	18.9079	6.32068	14.1029	19.6257	23.8315	7.88198	26.4388	35.8284	14.5426	4.06231	1.16803	1.64275	5.01175	32.6864	0	7.1351	0	0	0	3.15797	6.79881
MT2_Mm_dup860	4.84542	-2.27219	0.796103	-2.85415	0.00431528	0.0387655	Down	MT2_Mm	ERVL	LTR	MT2_Mm:ERVL:LTR	NA	2cWT-2cKO:8cKO-2cKO	3.50054	0	2.4964	0	0	1.17156	0	0	0	43.6697	0	24.2874	0	0	5.13011	10.6016	7.05351	2.73638	7.49849	3.86831	10.3451	8.13501	7.40858	13.3635	1.12064	0.438011	3.0117	3.00705	11.9525	0	0	0.895879	1.35292	2.04678	0.789493	3.39941
MT2_Mm_dup884	1.85312	-4.13532	1.26253	-3.27543	0.00105502	0.0136153	Down	MT2_Mm	ERVL	LTR	MT2_Mm:ERVL:LTR	NA	2cWT-2cKO	0	0	0	0	0	0	0	0	0	0	0	0	0	0	2.56505	22.2961	0.45802	0.631473	9.25739	5.80246	1.47787	10.1688	0.485809	1.49357	1.96111	0	2.19033	2.14789	0.731784	0	0	0.895879	0	1.02339	1.57899	3.39941
MT2_Mm_dup885	1.54344	-3.54893	1.23798	-2.86671	0.00414768	0.0376328	Down	MT2_Mm	ERVL	LTR	MT2_Mm:ERVL:LTR	NA	2cWT-2cKO:8cKO-2cKO	0	0.511321	0	0	0	0	0	0	0	0	0	0	0	0	3.66436	0.437178	2.3817	8.41964	4.72127	5.87154	1.23156	17.4322	3.76502	2.59409	0.700398	0	0.821373	3.57982	0.975712	0	0	0	0	0	78.9493	0
MT2_Mm_dup991	6.29036	-4.28952	1.28012	-3.35088	0.000805546	0.0109919	Down	MT2_Mm	ERVL	LTR	MT2_Mm:ERVL:LTR	8cWT-8cKO:8cWT-2cWT	2cWT-2cKO:8cKO-2cKO	0	0	0.832132	0	0	0	0	0	77.9606	0	0	48.5748	0	0	3.66436	7.9785	8.70238	11.156	3.70296	23.0026	17.4881	0	2.30759	5.97427	1.26072	9.05224	0.273791	3.15024	0.243928	0	1.0193	5.37527	0	1.02339	0	0
MT2A_dup4945	78.3921	-4.25702	1.54437	-2.75648	0.00584279	0.048145	Down	MT2A	ERVL	LTR	MT2A:ERVL:LTR	8cWT-2cWT	2cWT-2cKO	0	0	0	0	0	4.68626	0	0	8.66229	43.6697	0	0	2100.73	0	21.1312	10.4923	15.9391	3.15736	25.5504	3.86831	0.246312	41.2561	6.43696	23.111	0	10.8043	7.93994	19.0446	45.1267	115.836	174.3	8.95879	146.116	63.4503	0	0
MT2B1_dup1803	8.09302	-6.22195	1.64509	-3.78214	0.000155487	0.00287081	Down	MT2B1	ERVL	LTR	MT2B1:ERVL:LTR	8cWT-2cWT	2cWT-2cKO:8cKO-2cKO	0	0	0	0	0	0	0	0	17.3246	0	0	12.1437	0	0	48.736	52.1335	3.75576	8.84062	17.4039	56.574	6.1578	0	34.7353	22.1677	3.78215	7.88421	0	0	0	0	5.0965	0	2.70584	0	0	0
MT2B1_dup5692	6.28912	-4.31718	1.56084	-2.76593	0.00567607	0.0471193	Down	MT2B1	ERVL	LTR	MT2B1:ERVL:LTR	NA	2cWT-2cKO:8cKO-2cKO	0	0.511321	1.66426	0	2.6429	0	0	0	0	0	0	0	0	0	20.8869	8.41568	36.0004	0.420982	15.4598	55.8141	0	12.2025	0	24.1329	0.14008	43.2171	0	0	9.26927	0	0	0.895879	0	1.02339	0	0
MT2B1_dup5694	10.0448	-4.0265	1.24911	-3.2235	0.00126636	0.0157177	Down	MT2B1	ERVL	LTR	MT2B1:ERVL:LTR	NA	2cWT-2cKO:8cKO-2cKO	0	0.511321	0.832132	8.33796	0	0	0	0	0	0	36.8621	0	0	0	44.3388	31.5861	41.5882	5.26227	22.2177	51.4623	1.47787	0.290536	44.2086	67.2892	0.280159	0.876023	2.19033	1.14554	0.731784	0	2.0386	0	0	1.02339	7.10544	0
MT2B1_dup5705	6.65992	-5.51416	1.85334	-2.97525	0.0029275	0.029044	Down	MT2B1	ERVL	LTR	MT2B1:ERVL:LTR	NA	2cWT-2cKO:8cKO-2cKO	0	0	0	2.77932	0	0	0	10.5108	0	0	0	0	0	0	1.3436	10.7109	61.0999	86.0908	11.0163	43.104	0	1.16214	1.09307	16.1934	0	0	0.273791	0.143193	0	0	0	0.895879	0	0	0	0
MT2B1_dup5716	4.75989	-5.00723	1.77266	-2.82469	0.00473257	0.0415604	Down	MT2B1	ERVL	LTR	MT2B1:ERVL:LTR	NA	2cWT-2cKO	0	0	0	0	0	0	0	0	0	0	0	0	0	0	5.98513	3.60672	3.20614	10.735	29.0682	10.3615	0	0.871608	6.07261	18.8661	0	2.04405	3.28549	18.3287	0.487856	0	63.1966	0	0	0	0	0
MT2B2_dup2597	86.8746	-18.6655	2.50635	-7.4473	9.52693e-14	1.11135e-11	Down	MT2B2	ERVL	LTR	MT2B2:ERVL:LTR	8cWT-2cWT	2cWT-2cKO	0	0	0	0	0	0	0	1093.12	1004.83	0	0	837.915	0	0	0	0	0	0	0.46287	1.58877	18.4734	0	0	8.17532	0	1.75205	0	0	0	2.41324	0	25.0846	163.704	0	56.8435	0
MT2C_Mm_dup1054	2.21228	-3.23972	1.18039	-2.74463	0.00605791	0.0493256	Down	MT2C_Mm	ERVL	LTR	MT2C_Mm:ERVL:LTR	NA	2cWT-2cKO	0	0	0	0	0	2.34313	0	0	0	0	0	0	0	0	0.732873	0.655767	2.1985	10.9455	2.03663	4.00646	8.12829	6.39179	2.42904	4.95236	1.12064	7.15419	0.821373	8.16199	9.02534	0	0	10.7505	0	0	0	0
MT2C_Mm_dup1085	1.81038	-4.20016	1.49015	-2.81862	0.00482305	0.0421256	Down	MT2C_Mm	ERVL	LTR	MT2C_Mm:ERVL:LTR	NA	2cWT-2cKO	0	0	0	0	0	0	0	0	0	0	0	0	0	0	7.69516	0.109294	6.04586	2.10491	11.2014	0.276308	17.7345	0.581072	0	8.72558	0.14008	1.75205	0.273791	1.14554	6.82999	0	0	0	0	0	2.36848	0
MT2C_Mm_dup1502	10.7497	-5.90061	1.60712	-3.67153	0.000241101	0.00415363	Down	MT2C_Mm	ERVL	LTR	MT2C_Mm:ERVL:LTR	NA	2cWT-2cKO	0	0	0	0	0	0	0	0	0	0	36.8621	0	0	0	17.5889	2.73236	11.4505	4.6308	0.0925739	4.62815	33.2521	35.4454	0.242904	2.75131	45.9461	0	36.4142	12.0282	2.92714	0	44.8492	0.895879	0	0	105.003	0
MT2C_Mm_dup464	11.8816	-5.69511	1.75916	-3.2374	0.00120625	0.0151828	Down	MT2C_Mm	ERVL	LTR	MT2C_Mm:ERVL:LTR	8cWT-2cWT	2cWT-2cKO	0	0	0	0	0	0	0	42.0432	0	0	0	0	0	0	0.244291	7.43202	20.0613	0	12.3123	13.2628	23.8923	3.1959	0	0.393044	47.6271	0	27.3791	0	26.3442	0	2.0386	0.895879	56.8227	86.9883	68.6859	0
MT2C_Mm_dup774	17.9457	-4.21395	1.28216	-3.28659	0.00101407	0.013211	Down	MT2C_Mm	ERVL	LTR	MT2C_Mm:ERVL:LTR	8cWT-2cWT	2cWT-2cKO	0	2.04528	0	0	0	1.17156	122.584	10.5108	0	0	0	182.155	0	0	21.4976	14.3176	14.0154	22.5225	8.8871	17.6837	0	18.5943	23.0759	18.8661	6.8639	2.77407	0.821373	16.4672	20.0021	2.41324	1.0193	77.0456	0	1.02339	57.633	0
RMER10A_dup3091	12.7162	-3.38827	0.943082	-3.59277	0.000327183	0.00535248	Down	RMER10A	ERVL	LTR	RMER10A:ERVL:LTR	NA	2cWT-2cKO:8cKO-2cKO	0	8.18114	4.16066	0	0	2.34313	0	0	0	0	0	0	0	0	37.0101	31.5861	10.4429	19.5757	59.525	36.1963	0.246312	22.0807	18.3393	34.1949	29.6969	11.3883	82.4111	15.8944	31.2228	0	0	1.79176	0	0	14.2109	0
MLT1A0_dup1933	8.91537	-5.13148	1.84345	-2.78362	0.00537552	0.0453199	Down	MLT1A0	ERVL-MaLR	LTR	MLT1A0:ERVL-MaLR:LTR	NA	2cWT-2cKO	0	0	0	0	0	1.17156	0	42.0432	0	0	0	0	0	11.5449	32.0021	14.2083	0.732832	0	30.7345	6.90769	0	0	0.607261	13.3635	0	0	41.89	22.3381	15.3675	0	75.4282	1.79176	0	0	19.7373	0
MLT1G1_dup344	100.327	-18.6346	2.1893	-8.51168	1.71431e-17	4.15193e-15	Down	MLT1G1	ERVL-MaLR	LTR	MLT1G1:ERVL-MaLR:LTR	8cWT-2cWT	2cWT-2cKO	0	0	0	0	0	0	267.456	294.303	0	0	0	291.449	2617.83	0	0	0	0.183208	0	0	0	0.738936	0.290536	0	0	4.76271	0.438011	7.66615	0	15.3675	7.23973	170.223	4.4794	0	29.6784	0	0
MLT1J_dup2031	4.81656	-4.22846	1.37632	-3.07228	0.00212427	0.0232601	Down	MLT1J	ERVL-MaLR	LTR	MLT1J:ERVL-MaLR:LTR	NA	2cWT-2cKO:8cKO-2cKO	0	0	0	5.55864	0	0	0	10.5108	0	0	0	0	16.1594	0	1.83218	30.6025	17.3132	6.31473	18.7925	0.138154	9.11354	0.290536	0.121452	5.73845	2.38135	1.75205	36.9618	8.16199	0	0	0	0	0	3.07018	0	3.39941
MT-int_dup157	9.22664	-5.1619	1.40281	-3.6797	0.000233511	0.0040424	Down	MT-int	ERVL-MaLR	LTR	MT-int:ERVL-MaLR:LTR	NA	2cWT-2cKO	0	0	1.66426	0	0	0	0	0	0	43.6697	0	0	16.1594	0	18.444	16.7221	18.6872	0.210491	5.46186	3.66108	11.3303	1.45268	26.2337	22.7966	27.1754	0	0	82.3358	17.3189	4.82649	0	0.895879	0	1.02339	21.3163	0
MT-int_dup169	10.9621	-1.58867	0.453611	-3.50228	0.000461295	0.00706712	Down	MT-int	ERVL-MaLR	LTR	MT-int:ERVL-MaLR:LTR	NA	2cWT-2cKO:8cKO-2cKO	11.6685	7.1585	6.65706	5.55864	2.6429	4.68626	0	0	0	0	0	12.1437	16.1594	11.5449	44.5831	35.3021	13.9238	8.84062	22.2177	24.5223	26.3554	5.22965	13.1168	18.8661	23.2532	19.7105	13.142	22.9108	9.5132	7.23973	3.0579	2.68764	5.41169	4.09357	0	3.39941
MT-int_dup20	12.2399	-5.69474	1.30994	-4.34731	1.37816e-05	0.000342582	Down	MT-int	ERVL-MaLR	LTR	MT-int:ERVL-MaLR:LTR	8cWT-2cWT	2cWT-2cKO	0	0	0	0	0	0	11.144	0	0	0	0	0	0	0	1.46575	20.5474	3.84737	3.15736	0.833165	1.31246	85.2239	17.4322	5.95116	6.52454	6.1635	17.2285	2.73791	2.86386	7.07391	24.1324	0	77.0456	0	81.8714	35.5272	40.7929
MT-int_dup351	21.3265	-1.00922	0.363379	-2.77732	0.00548091	0.0460779	Down	MT-int	ERVL-MaLR	LTR	MT-int:ERVL-MaLR:LTR	NA	2cWT-2cKO	16.3359	28.1227	9.15346	8.33796	2.6429	18.745	11.144	0	17.3246	0	0	0	48.4783	11.5449	35.7886	29.9467	50.0158	23.996	29.6237	30.3938	16.2566	36.317	28.9056	27.0415	25.3544	30.5148	23.546	30.2137	35.8574	48.2649	16.3088	39.4187	4.05877	11.2573	15.7899	23.7958
MT-int_dup399	15.6531	-2.70047	0.762397	-3.54207	0.000396994	0.00624827	Down	MT-int	ERVL-MaLR	LTR	MT-int:ERVL-MaLR:LTR	NA	2cWT-2cKO:8cKO-2cKO	3.50054	6.13585	4.16066	5.55864	7.9287	1.17156	0	0	17.3246	0	0	0	0	11.5449	66.2028	16.8314	9.252	92.195	4.6287	19.9632	17.2418	148.754	21.6185	21.303	4.34247	12.1183	6.84478	4.0094	6.0982	14.4795	7.1351	17.0217	4.05877	1.02339	1.57899	6.79881
MTA_Mm_dup10032	3.02579	-3.77661	1.18758	-3.18008	0.00147232	0.0175538	Down	MTA_Mm	ERVL-MaLR	LTR	MTA_Mm:ERVL-MaLR:LTR	NA	2cWT-2cKO:8cKO-2cKO	0	1.53396	0	0	0	0	0	0	0	0	0	0	0	0	6.35156	5.02755	4.21378	13.6819	1.01831	0.345385	0.492624	2.03375	7.16568	13.4421	8.40478	19.4185	4.92824	1.28874	15.3675	7.23973	0	0	0	0	0	0
MTA_Mm_dup10087	5.01924	-5.08857	1.44308	-3.52619	0.000421578	0.00658873	Down	MTA_Mm	ERVL-MaLR	LTR	MTA_Mm:ERVL-MaLR:LTR	NA	2cWT-2cKO	0	0.511321	0	0	0	0	0	0	0	0	0	0	0	0	2.19862	14.6455	0.274812	23.7855	27.587	13.2628	14.0398	5.81072	0	4.55931	10.2258	1.31403	38.8783	6.0141	0.975712	0	0	20.6052	0	1.02339	0	0
MTA_Mm_dup10094	3.3069	-5.12116	1.64392	-3.11521	0.00183813	0.0208034	Down	MTA_Mm	ERVL-MaLR	LTR	MTA_Mm:ERVL-MaLR:LTR	NA	2cWT-2cKO:8cKO-2cKO	0	0	0	0	0	0	0	0	0	0	0	0	0	0	9.28305	22.9518	7.23672	0.210491	10.9237	9.67077	0.985248	15.1079	5.22244	4.24488	0	0	27.9267	8.59157	0	0	0	0	0	0	0	0
MTA_Mm_dup10183	1.65992	-4.1271	1.41161	-2.92368	0.00345915	0.0328573	Down	MTA_Mm	ERVL-MaLR	LTR	MTA_Mm:ERVL-MaLR:LTR	NA	2cWT-2cKO:8cKO-2cKO	0	0	0	0	0	0	0	0	0	0	0	0	0	0	1.83218	0.218589	7.78634	11.7875	17.4965	4.42092	0	11.0404	0.364356	1.33635	0.420239	1.02203	1.36896	0.859157	1.46357	0	0	0	0	0	0	0
MTA_Mm_dup10356	3.01071	-4.96236	1.24532	-3.9848	6.75359e-05	0.00140815	Down	MTA_Mm	ERVL-MaLR	LTR	MTA_Mm:ERVL-MaLR:LTR	NA	2cWT-2cKO:8cKO-2cKO	0	0	0	0	0	0	0	0	0	0	0	0	0	0	18.6883	0	4.30539	13.0504	3.8881	5.94061	5.66517	5.52018	9.59472	3.30157	16.3893	11.0963	9.85648	2.29108	0	0	1.0193	0	0	0	0.789493	0
MTA_Mm_dup10395	2.90593	-3.617	1.31832	-2.74363	0.00607635	0.0494419	Down	MTA_Mm	ERVL-MaLR	LTR	MTA_Mm:ERVL-MaLR:LTR	NA	2cWT-2cKO	0	0	0	2.77932	2.6429	0	0	0	0	0	0	0	0	0	8.55018	1.63942	11.0841	21.8911	6.10988	3.592	1.23156	3.1959	5.8297	3.38018	10.646	2.33606	0	0	11.2207	0	0	0	2.70584	0	8.68443	0
MTA_Mm_dup10574	1.98803	-4.13617	1.13658	-3.63914	0.000273551	0.00458867	Down	MTA_Mm	ERVL-MaLR	LTR	MTA_Mm:ERVL-MaLR:LTR	8cWT-2cWT	2cWT-2cKO:8cKO-2cKO	0	0	0	0	0	0	0	10.5108	0	0	0	0	0	0	4.27509	1.63942	0.91604	5.05178	10.7386	0.207231	9.35985	1.16214	3.40066	1.96522	1.54088	2.62807	12.5944	0.572771	6.0982	0	0	0.895879	0	0	0	0
MTA_Mm_dup10705	19.2012	-2.54979	0.856508	-2.97696	0.00291127	0.0289795	Down	MTA_Mm	ERVL-MaLR	LTR	MTA_Mm:ERVL-MaLR:LTR	NA	2cWT-2cKO:8cKO-2cKO	3.50054	24.0321	0	0	0	1.17156	0	0	0	87.3395	36.8621	12.1437	16.1594	0	49.1025	24.9191	21.2521	28.4163	24.1618	27.5617	43.3509	48.5195	15.303	12.5774	17.0897	61.4676	13.142	22.3381	56.5913	7.23973	17.3281	36.731	1.35292	0	0.789493	0
MTA_Mm_dup10847	13.4064	-5.18327	0.893888	-5.79857	6.68825e-09	3.29757e-07	Down	MTA_Mm	ERVL-MaLR	LTR	MTA_Mm:ERVL-MaLR:LTR	NA	2cWT-2cKO:8cKO-2cKO	2.33369	1.02264	0.832132	0	0	0	0	0	0	0	0	0	0	0	17.9554	22.7333	33.9851	54.5172	20.0885	47.5249	42.3657	1.45268	32.0634	36.0029	25.3544	27.5947	55.5796	30.7864	30.2471	0	0	0	0	0	0	13.5976
MTA_Mm_dup10880	4.04648	-4.12966	1.40726	-2.93454	0.00334045	0.0320367	Down	MTA_Mm	ERVL-MaLR	LTR	MTA_Mm:ERVL-MaLR:LTR	NA	2cWT-2cKO:8cKO-2cKO	0	0.511321	1.66426	0	0	0	0	0	0	0	0	0	0	0	21.7419	28.963	0.732832	0.420982	2.4995	18.5126	0.246312	11.6214	17.732	12.656	0.280159	0	0.273791	2.72066	27.5639	0	0	0	0	0	1.57899	0
MTA_Mm_dup10898	11.684	-4.75216	1.41864	-3.34979	0.000808721	0.0110184	Down	MTA_Mm	ERVL-MaLR	LTR	MTA_Mm:ERVL-MaLR:LTR	NA	2cWT-2cKO:8cWT-8cKO:8cWT-2cWT	0	0.511321	1.66426	0	0	1.17156	0	0	0	0	0	0	0	0	58.752	12.8967	12.8246	18.5232	1.57376	15.4042	19.2123	9.00662	0.364356	16.8223	26.6151	20.5865	16.1537	30.6433	0.731784	0	166.146	0	2.70584	0	0	0
MTA_Mm_dup10909	5.99286	-2.64783	0.79144	-3.34559	0.000821087	0.0111358	Down	MTA_Mm	ERVL-MaLR	LTR	MTA_Mm:ERVL-MaLR:LTR	NA	2cWT-2cKO:8cKO-2cKO	2.33369	2.04528	0.832132	0	0	4.68626	0	0	0	0	0	0	16.1594	0	8.55018	5.35543	7.69474	15.5763	6.85047	8.70369	7.63567	24.6956	1.94323	9.59028	1.82103	24.6746	45.7231	6.0141	0.975712	4.82649	3.0579	1.79176	2.70584	4.09357	0	3.39941
MTA_Mm_dup10933	5.90607	-3.05047	0.897021	-3.40067	0.000672209	0.00962116	Down	MTA_Mm	ERVL-MaLR	LTR	MTA_Mm:ERVL-MaLR:LTR	NA	2cWT-2cKO:8cKO-2cKO	1.16685	2.04528	0	0	0	5.85782	0	0	0	0	0	0	0	0	4.76367	11.9131	5.77105	25.2589	16.2004	14.2989	1.23156	29.6347	0.728713	7.54645	6.58374	29.3468	33.6763	6.15729	16.3432	0	0	0	0	0	0	0
MTA_Mm_dup10977	1.53401	-3.99439	0.982279	-4.06645	4.77346e-05	0.0010352	Down	MTA_Mm	ERVL-MaLR	LTR	MTA_Mm:ERVL-MaLR:LTR	NA	2cWT-2cKO:8cKO-2cKO	0	0	0	0	0	0	0	0	0	0	0	0	0	0	1.46575	3.38813	4.5802	1.05245	2.1292	2.694	4.92624	8.13501	3.52211	4.08766	1.26072	2.04405	10.4041	2.43428	4.63463	0	0	0	0	0	0	0
MTA_Mm_dup1102	2.25934	-3.34178	1.04991	-3.18291	0.00145801	0.0174414	Down	MTA_Mm	ERVL-MaLR	LTR	MTA_Mm:ERVL-MaLR:LTR	8cWT-2cWT	2cWT-2cKO:8cKO-2cKO	0	0.511321	0.832132	0	0	0	0	10.5108	0	0	0	0	0	0	8.30589	3.27883	2.3817	8.84062	0.370296	3.79923	7.88198	8.13501	5.70825	0.628871	0.980557	6.71618	1.09516	0.572771	8.29356	0	0	0	1.35292	0	0	3.39941
MTA_Mm_dup11070	5.63208	-4.70633	1.22298	-3.84823	0.000118973	0.00228398	Down	MTA_Mm	ERVL-MaLR	LTR	MTA_Mm:ERVL-MaLR:LTR	8cWT-8cKO:8cWT-2cWT	2cWT-2cKO:8cKO-2cKO	0	0.511321	0	2.77932	0	0	0	0	8.66229	0	0	24.2874	0	0	2.07647	36.7229	6.41228	34.5205	1.38861	23.6243	2.46312	9.00662	0	4.79514	12.4671	26.8647	6.57099	1.57512	3.65892	0	0	0	0	0	0	0
MTA_Mm_dup11084	2.37766	-4.05913	1.19821	-3.38767	0.000704888	0.00996108	Down	MTA_Mm	ERVL-MaLR	LTR	MTA_Mm:ERVL-MaLR:LTR	NA	2cWT-2cKO:8cKO-2cKO	0	0	0	0	0	1.17156	0	0	0	0	0	0	0	0	15.6346	11.0387	2.93133	1.26295	2.96237	3.10846	0.246312	7.84447	0.364356	2.20105	7.70438	8.32222	0	4.86855	14.8796	2.41324	1.0193	0	0	0	0	0
MTA_Mm_dup11098	6.93932	-2.54165	0.868375	-2.9269	0.00342357	0.0326933	Down	MTA_Mm	ERVL-MaLR	LTR	MTA_Mm:ERVL-MaLR:LTR	NA	2cWT-2cKO:8cKO-2cKO	1.16685	2.04528	0.832132	0	0	10.5441	0	0	0	0	0	0	0	0	5.00796	28.3073	33.9851	44.2031	6.48017	4.28277	9.60617	4.64858	0.242904	8.72558	15.6889	9.78226	49.2824	2.43428	6.34213	0	0	3.58352	1.35292	2.04678	1.57899	0
MTA_Mm_dup11203	8.52778	-2.53309	0.827569	-3.06088	0.00220684	0.0238569	Down	MTA_Mm	ERVL-MaLR	LTR	MTA_Mm:ERVL-MaLR:LTR	NA	2cWT-2cKO:8cKO-2cKO	9.33477	0	1.66426	2.77932	0	2.34313	0	10.5108	0	43.6697	0	0	0	0	31.6357	1.63942	12.2749	13.4714	4.6287	4.83538	27.8333	35.4454	27.4482	9.98333	5.88334	11.5343	23.546	12.7442	11.9525	0	0	0.895879	0	0	9.47392	0
MTA_Mm_dup11207	8.71467	-4.34088	1.20945	-3.58913	0.000331778	0.00540289	Down	MTA_Mm	ERVL-MaLR	LTR	MTA_Mm:ERVL-MaLR:LTR	NA	2cWT-2cKO	0	0	1.66426	0	0	1.17156	0	0	0	0	0	0	16.1594	0	11.8481	2.73236	4.21378	33.4681	3.51781	3.24661	3.94099	5.81072	5.46535	1.7294	37.5413	5.98616	41.89	5.58452	22.9292	4.82649	1.0193	86.9003	0	17.3977	0	3.39941
MTA_Mm_dup11299	4.09719	-4.571	1.4684	-3.11292	0.00185248	0.0209259	Down	MTA_Mm	ERVL-MaLR	LTR	MTA_Mm:ERVL-MaLR:LTR	8cWT-2cWT	2cWT-2cKO:8cKO-2cKO	0	0.511321	0	0	0	0	0	10.5108	0	0	0	24.2874	0	0	0.122145	0.109294	3.11454	0.210491	0.185148	6.35508	0	2.61482	1.82178	9.27585	0.560318	24.5286	29.5694	0.286386	35.6135	0	0	0.895879	0	1.02339	0	0
MTA_Mm_dup1136	5.72698	-3.9077	1.29561	-3.01612	0.00256033	0.0264475	Down	MTA_Mm	ERVL-MaLR	LTR	MTA_Mm:ERVL-MaLR:LTR	NA	2cWT-2cKO:8cKO-2cKO	3.50054	0.511321	0	0	0	0	0	0	0	0	0	0	16.1594	0	26.5056	4.48107	5.58784	0	6.10988	1.93415	0.246312	1.45268	18.7036	10.2192	0.980557	0.730019	46.8183	34.6527	20.9778	0	0	0	0	0	3.15797	0
MTA_Mm_dup11426	3.21996	-4.42286	1.11372	-3.97124	7.14993e-05	0.0014787	Down	MTA_Mm	ERVL-MaLR	LTR	MTA_Mm:ERVL-MaLR:LTR	NA	2cWT-2cKO:8cKO-2cKO	0	0	0	0	0	1.17156	0	0	0	0	0	0	0	0	6.84015	2.95095	10.8093	3.99933	3.8881	7.11492	11.823	4.93911	6.31551	13.8352	5.74326	8.61423	0	7.44602	12.4403	0	0	9.85467	1.35292	0	0	0
MTA_Mm_dup11503	3.54295	-4.46937	1.47237	-3.0355	0.00240134	0.0252261	Down	MTA_Mm	ERVL-MaLR	LTR	MTA_Mm:ERVL-MaLR:LTR	NA	2cWT-2cKO:8cKO-2cKO	1.16685	0	0	0	0	0	0	0	0	0	0	0	16.1594	0	13.9246	3.06025	0.183208	0.210491	1.38861	14.0226	0	19.1754	1.33597	8.96141	0	0.292008	29.8432	6.15729	13.416	0	0	1.79176	0	0	0	0
MTA_Mm_dup11504	3.77288	-3.33856	1.20415	-2.77255	0.00556196	0.04654	Down	MTA_Mm	ERVL-MaLR	LTR	MTA_Mm:ERVL-MaLR:LTR	NA	2cWT-2cKO:8cKO-2cKO	0	2.04528	0.832132	0	0	1.17156	0	0	0	0	0	0	0	0	29.0706	0.655767	2.2901	10.1036	5.64701	0.483538	18.4734	0.290536	1.09307	21.8533	0.840478	29.0548	0.547582	0.286386	13.1721	0	0	0.895879	0	0	0.789493	0
MTA_Mm_dup11527	10.2292	-2.57359	0.687905	-3.74119	0.00018315	0.00330188	Down	MTA_Mm	ERVL-MaLR	LTR	MTA_Mm:ERVL-MaLR:LTR	NA	2cWT-2cKO:8cKO-2cKO	3.50054	1.53396	0.832132	0	15.8574	2.34313	0	0	0	3537.25	36.8621	0	0	0	11.6038	5.68331	19.1452	35.3625	39.8068	21.7592	28.5722	22.6618	20.2825	17.687	3.64207	6.57017	27.6529	14.4625	35.3696	0	1.0193	6.27115	0	0	0	0
MTA_Mm_dup11539	5.43632	-3.79614	0.98099	-3.8697	0.000108968	0.00211629	Down	MTA_Mm	ERVL-MaLR	LTR	MTA_Mm:ERVL-MaLR:LTR	8cWT-2cWT	2cWT-2cKO:8cKO-2cKO	0	0.511321	1.66426	2.77932	0	0	11.144	0	17.3246	0	0	0	0	0	4.76367	2.84166	8.42757	22.733	2.77722	2.00323	3.44837	5.22965	23.4403	11.3197	2.24127	16.9364	44.9017	1.57512	4.14678	4.82649	0	0.895879	0	1.02339	0.789493	3.39941
MTA_Mm_dup11655	3.60975	-4.64329	1.46605	-3.16721	0.00153908	0.0181308	Down	MTA_Mm	ERVL-MaLR	LTR	MTA_Mm:ERVL-MaLR:LTR	NA	2cWT-2cKO:8cKO-2cKO	0	0	0	0	0	0	0	0	0	43.6697	0	0	0	0	4.15295	18.5801	0.45802	1.26295	4.72127	3.31569	0	9.87822	0.242904	4.16627	0.280159	23.5066	0	1.43193	15.8553	0	2.0386	0	0	0	0	0
MTA_Mm_dup11785	5.89877	-4.81511	1.14475	-4.20627	2.59616e-05	0.00059866	Down	MTA_Mm	ERVL-MaLR	LTR	MTA_Mm:ERVL-MaLR:LTR	NA	2cWT-2cKO:8cKO-2cKO	0	0	0	0	0	2.34313	0	0	0	0	0	0	0	11.5449	25.6505	35.5207	2.65652	0.631473	8.42423	5.388	36.2079	11.912	10.6878	12.1058	0.280159	7.5922	3.55928	6.87325	35.8574	0	1.0193	0	0	0	0	0
MTA_Mm_dup11860	1.77402	-4.0147	1.43906	-2.78981	0.00527396	0.0447385	Down	MTA_Mm	ERVL-MaLR	LTR	MTA_Mm:ERVL-MaLR:LTR	8cWT-2cWT	2cWT-2cKO:8cKO-2cKO	0	0	0	0	0	0	0	0	8.66229	0	0	0	0	0	6.59585	0	0.549624	0.420982	2.1292	6.286	19.4586	6.68233	1.82178	4.87375	0	0.292008	4.92824	1.71831	1.21964	0	0	0	0	0	0	0
MTA_Mm_dup12101	33.3481	-2.98778	0.842631	-3.54577	0.000391463	0.00617757	Down	MTA_Mm	ERVL-MaLR	LTR	MTA_Mm:ERVL-MaLR:LTR	8cWT-2cWT	2cWT-2cKO	3.50054	5.62453	1.66426	8.33796	5.2858	1.17156	22.288	94.5972	8.66229	43.6697	0	0	0	11.5449	68.89	46.8873	12.733	46.308	10.3683	9.80892	69.2137	3.77697	27.8125	24.919	38.5219	51.2473	36.688	25.3451	13.66	16.8927	1.0193	50.1692	4.05877	1.02339	161.057	302.547
MTA_Mm_dup1220	4.91818	-4.65792	1.45466	-3.20206	0.00136448	0.0166004	Down	MTA_Mm	ERVL-MaLR	LTR	MTA_Mm:ERVL-MaLR:LTR	8cWT-2cWT	2cWT-2cKO	0	0	0	0	0	0	0	0	0	0	0	12.1437	0	0	3.29793	3.82531	0.183208	9.05111	4.07325	3.31569	12.0693	9.29715	1.57888	2.04383	0.280159	12.5563	20.2605	4.43898	2.68321	0	0	2.68764	0	0	0	78.1863
MTA_Mm_dup12285	9.94818	-3.22043	1.10963	-2.90225	0.00370491	0.0346386	Down	MTA_Mm	ERVL-MaLR	LTR	MTA_Mm:ERVL-MaLR:LTR	NA	2cWT-2cKO:8cKO-2cKO	0	0	0	0	0	12.8872	0	0	0	0	0	12.1437	16.1594	0	2.56505	40.1111	33.8019	24.6274	3.33266	4.90446	14.0398	2.03375	22.5901	28.142	3.22183	65.7017	33.1287	8.30518	25.6125	0	0	0	1.35292	0	13.4214	0
MTA_Mm_dup12347	5.60917	-5.72996	1.49257	-3.83898	0.000123545	0.00236085	Down	MTA_Mm	ERVL-MaLR	LTR	MTA_Mm:ERVL-MaLR:LTR	8cWT-2cWT	2cWT-2cKO:8cKO-2cKO	0	0	0	0	0	0	0	21.0216	0	0	0	0	0	0	35.3	0.98365	23.6338	33.889	11.8495	13.3318	0.246312	15.3984	13.2383	0.628871	17.9302	0	0	7.15964	12.9282	0	0	0	0	0	0	0
MTA_Mm_dup12348	12.0225	-4.26616	0.894703	-4.76824	1.85843e-06	5.59347e-05	Down	MTA_Mm	ERVL-MaLR	LTR	MTA_Mm:ERVL-MaLR:LTR	NA	2cWT-2cKO:8cKO-2cKO	4.66739	1.02264	0.832132	0	0	1.17156	0	21.0216	0	0	0	0	0	0	24.6734	1.09294	34.5347	91.1426	17.0336	12.6411	10.8377	23.824	7.28713	16.1934	29.2766	31.2448	60.5078	0.859157	49.7613	0	1.0193	0	1.35292	2.04678	0.789493	0
MTA_Mm_dup12389	10.5015	-5.41083	1.40008	-3.86465	0.00011125	0.00215589	Down	MTA_Mm	ERVL-MaLR	LTR	MTA_Mm:ERVL-MaLR:LTR	NA	2cWT-2cKO	0	0	0	0	0	1.17156	0	0	0	0	0	0	0	0	21.4976	7.21344	12.9162	18.5232	2.4995	6.42415	22.1681	29.3441	8.50165	6.36732	0.280159	37.231	25.7364	15.4648	0.243928	164.101	0	0.895879	0	1.02339	2.36848	0
MTA_Mm_dup12442	2.19742	-2.87786	1.00034	-2.87687	0.00401643	0.0366864	Down	MTA_Mm	ERVL-MaLR	LTR	MTA_Mm:ERVL-MaLR:LTR	8cWT-8cKO	2cWT-2cKO:8cKO-2cKO	0	0.511321	0	2.77932	0	1.17156	0	0	8.66229	0	0	0	0	0	13.9246	2.73236	3.57256	0.631473	1.85148	2.694	5.41886	4.0675	2.67195	0.943306	2.94167	1.31403	18.6178	4.43898	1.46357	0	0	0.895879	0	0	0	0
MTA_Mm_dup12490	3.39017	-4.59744	1.30898	-3.51223	0.000444364	0.00686667	Down	MTA_Mm	ERVL-MaLR	LTR	MTA_Mm:ERVL-MaLR:LTR	8cWT-2cWT	2cWT-2cKO:8cKO-2cKO	0	0	0	0	0	0	0	0	0	0	36.8621	0	0	0	0.855018	0.765061	3.11454	0.631473	19.996	20.9303	2.21681	5.81072	4.73663	0.550262	0.280159	22.1926	0.547582	1.00235	1.21964	0	1.0193	0	2.70584	0	0	0
MTA_Mm_dup12554	3.22906	-3.95842	1.14872	-3.44594	0.000569085	0.0084151	Down	MTA_Mm	ERVL-MaLR	LTR	MTA_Mm:ERVL-MaLR:LTR	8cWT-2cWT	2cWT-2cKO:8cKO-2cKO	0	0	0	2.77932	0	0	0	31.5324	0	0	0	0	0	0	11.726	0.655767	8.79398	0.210491	0.833165	10.1543	14.7787	10.4593	1.82178	1.49357	2.52143	5.40214	3.55928	5.01175	0.243928	2.41324	0	0.895879	0	0	0.789493	3.39941
MTA_Mm_dup12583	8.82368	-4.04094	1.06081	-3.80928	0.000139371	0.00261567	Down	MTA_Mm	ERVL-MaLR	LTR	MTA_Mm:ERVL-MaLR:LTR	NA	2cWT-2cKO:8cKO-2cKO	0	0	0	0	10.5716	0	0	0	0	0	0	0	0	11.5449	8.79447	3.27883	17.8628	51.5703	23.6989	10.1543	0.985248	1.16214	12.9954	28.0634	20.0314	63.6577	5.74961	30.3569	23.4171	0	0	1.79176	0	0	0.789493	0
MTA_Mm_dup12591	12.3141	-4.66919	1.30215	-3.58575	0.000336114	0.0054536	Down	MTA_Mm	ERVL-MaLR	LTR	MTA_Mm:ERVL-MaLR:LTR	NA	2cWT-2cKO	0	2.55661	0	2.77932	0	0	0	0	0	0	0	0	16.1594	0	29.6813	31.8047	18.5956	14.5239	30.3642	22.6572	3.69468	18.5943	4.97954	17.1367	1.4008	8.17621	77.7567	15.7512	40.0042	0	0	97.6508	1.35292	0	0	0
MTA_Mm_dup12667	1.70154	-4.11872	1.1439	-3.60061	0.000317468	0.00521267	Down	MTA_Mm	ERVL-MaLR	LTR	MTA_Mm:ERVL-MaLR:LTR	NA	2cWT-2cKO:8cKO-2cKO	0	0	0	0	0	0	0	0	0	0	0	0	0	0	2.6872	2.40448	7.41992	3.99933	1.57376	0.276308	2.21681	4.35804	0.728713	1.65079	15.4088	8.61423	6.57099	0.572771	2.68321	0	0	1.79176	0	0	0	0
MTA_Mm_dup12731	2.0317	-2.30659	0.817604	-2.82115	0.00478513	0.0418857	Down	MTA_Mm	ERVL-MaLR	LTR	MTA_Mm:ERVL-MaLR:LTR	NA	2cWT-2cKO	1.16685	0.511321	0.832132	0	0	1.17156	0	0	0	0	0	0	0	0	2.80935	2.18589	5.22143	2.3154	1.94405	3.24661	1.47787	11.0404	5.10099	6.2101	2.94167	5.25614	3.55928	1.71831	0.975712	4.82649	0	1.79176	2.70584	0	1.57899	0
MTA_Mm_dup13073	7.27446	-6.14672	1.13787	-5.40194	6.5924e-08	2.63814e-06	Down	MTA_Mm	ERVL-MaLR	LTR	MTA_Mm:ERVL-MaLR:LTR	8cWT-2cWT	2cWT-2cKO:8cKO-2cKO	0	0	0	0	0	0	0	10.5108	0	0	0	0	0	0	2.80935	23.1704	19.42	41.6772	3.70296	1.72692	8.62092	58.3977	3.64356	9.11863	9.24525	2.92008	40.5211	13.8897	10.7328	0	0	0.895879	1.35292	0	0	6.79881
MTA_Mm_dup13086	11.2134	-5.28862	1.44452	-3.66116	0.00025108	0.00428829	Down	MTA_Mm	ERVL-MaLR	LTR	MTA_Mm:ERVL-MaLR:LTR	NA	2cWT-2cKO	0	0	0.832132	0	0	0	0	0	0	0	0	0	0	0	6.84015	14.5362	29.7713	17.4707	3.61038	6.07877	4.43362	17.1416	4.00792	17.3726	20.3115	10.0743	29.2956	0.859157	15.3675	2.41324	0	3.58352	0	0	0	0
MTA_Mm_dup13124	3.17035	-3.54051	1.17349	-3.01707	0.00255235	0.0264083	Down	MTA_Mm	ERVL-MaLR	LTR	MTA_Mm:ERVL-MaLR:LTR	NA	2cWT-2cKO	0	0	0	5.55864	0	0	0	10.5108	0	0	0	0	0	0	1.95433	2.18589	7.41992	20.6281	6.0173	8.22015	3.94099	1.45268	1.45743	1.17913	1.4008	2.33606	23.8198	0.429578	2.19535	0	0	0	0	1.02339	0.789493	10.1982
MTA_Mm_dup13126	4.70414	-4.30292	1.29334	-3.32698	0.000877937	0.011755	Down	MTA_Mm	ERVL-MaLR	LTR	MTA_Mm:ERVL-MaLR:LTR	NA	2cWT-2cKO	0	0	0	0	2.6429	0	0	0	0	0	36.8621	0	0	0	12.4588	15.5198	13.8322	5.26227	3.79553	3.52292	5.66517	10.7498	0.971617	11.3983	1.82103	1.16803	0.273791	8.87795	3.65892	2.41324	0	0	0	0	33.1587	0
MTA_Mm_dup13150	3.29881	-4.89873	1.09094	-4.49039	7.10922e-06	0.000190519	Down	MTA_Mm	ERVL-MaLR	LTR	MTA_Mm:ERVL-MaLR:LTR	8cWT-2cWT	2cWT-2cKO:8cKO-2cKO	0	0	0	0	0	0	0	0	0	0	0	0	0	11.5449	7.69516	18.4708	9.1604	4.20982	5.55443	0.207231	6.1578	14.2363	6.43696	1.49357	8.68494	3.6501	0.547582	10.5963	7.8057	0	1.0193	0	0	0	0	0
MTA_Mm_dup13313	1.66136	-4.04002	1.3908	-2.90481	0.00367474	0.0344106	Down	MTA_Mm	ERVL-MaLR	LTR	MTA_Mm:ERVL-MaLR:LTR	NA	2cWT-2cKO:8cKO-2cKO	0	0	0	0	0	0	0	0	0	0	0	0	0	0	0.610727	2.29518	5.31303	1.47344	1.29603	5.87154	0	17.4322	0	4.4021	0.420239	2.04405	13.142	1.57512	2.19535	0	0	0	0	0	0	3.39941
MTA_Mm_dup13341	3.27508	-4.43741	1.27786	-3.47253	0.000515584	0.00775243	Down	MTA_Mm	ERVL-MaLR	LTR	MTA_Mm:ERVL-MaLR:LTR	NA	2cWT-2cKO	0	0.511321	0	0	0	0	0	0	0	0	0	0	0	0	0.122145	5.35543	3.02293	13.6819	0.833165	0.345385	1.23156	25.8577	11.4165	6.52454	8.96509	7.5922	7.11857	11.7418	0.731784	0	1.0193	0.895879	0	0	14.2109	0
MTA_Mm_dup13364	6.9631	-3.74022	1.3502	-2.77011	0.00560367	0.0467544	Down	MTA_Mm	ERVL-MaLR	LTR	MTA_Mm:ERVL-MaLR:LTR	8cWT-8cKO:8cWT-2cWT	2cWT-2cKO:8cKO-2cKO	0	0	0	0	0	1.17156	189.448	0	0	0	0	0	0	0	11.1152	1.9673	8.97719	1.89442	1.48118	1.45062	0.985248	0.290536	8.74456	6.52454	14.9885	0.292008	1.64275	5.44133	1.21964	0	0	59.128	0	0	0	0
MTA_Mm_dup13378	1.92693	-4.34536	1.30998	-3.31713	0.000909487	0.0120863	Down	MTA_Mm	ERVL-MaLR	LTR	MTA_Mm:ERVL-MaLR:LTR	NA	2cWT-2cKO:8cKO-2cKO	0	0	0	0	0	0	0	0	0	0	0	0	0	0	4.64153	5.13684	6.8703	3.15736	4.16583	1.31246	0.738936	5.52018	0.607261	11.7127	0.560318	25.5507	0.547582	0.286386	0.487856	0	0	0	0	0	0	0
MTA_Mm_dup13537	6.01169	-3.11751	0.880597	-3.54022	0.000399791	0.00628123	Down	MTA_Mm	ERVL-MaLR	LTR	MTA_Mm:ERVL-MaLR:LTR	NA	2cWT-2cKO:8cKO-2cKO	0	1.53396	0.832132	0	0	3.51469	11.144	0	0	0	36.8621	0	0	0	16.2453	16.8314	19.42	7.78817	10.5534	6.97677	10.0988	2.03375	8.50165	5.3454	2.38135	3.9421	16.4275	0.143193	25.6125	2.41324	1.0193	0.895879	1.35292	7.16374	0	3.39941
MTA_Mm_dup13635	11.9984	-2.32167	0.840952	-2.76076	0.00576666	0.0476719	Down	MTA_Mm	ERVL-MaLR	LTR	MTA_Mm:ERVL-MaLR:LTR	NA	2cWT-2cKO	1.16685	4.60189	3.32853	8.33796	5.2858	3.51469	0	10.5108	17.3246	0	0	0	0	0	15.8789	23.1704	22.0766	41.8877	11.3866	8.22015	19.2123	72.9245	32.1848	16.9009	2.24127	23.9446	3.0117	16.0376	5.85427	4.82649	1.0193	4.4794	63.5873	1.02339	0	0
MTA_Mm_dup13750	3.3329	-4.99687	1.27396	-3.92232	8.76991e-05	0.00175084	Down	MTA_Mm	ERVL-MaLR	LTR	MTA_Mm:ERVL-MaLR:LTR	8cWT-2cWT	2cWT-2cKO:8cKO-2cKO	0	0	0	0	0	0	11.144	0	0	0	0	0	0	0	1.22145	6.22979	2.65652	3.99933	4.16583	2.90123	10.8377	5.81072	2.18614	16.9795	20.8719	29.2008	4.38066	0	0.731784	0	0	0	0	0	0	0
MTA_Mm_dup13769	1.49868	-3.97825	1.29484	-3.07239	0.00212353	0.0232601	Down	MTA_Mm	ERVL-MaLR	LTR	MTA_Mm:ERVL-MaLR:LTR	NA	2cWT-2cKO:8cKO-2cKO	0	0	0	0	0	0	0	0	0	0	0	0	0	0	0.244291	4.69966	4.30539	0.420982	4.99899	3.03938	0	4.64858	2.06469	5.97427	0.420239	7.5922	6.0234	0.286386	10.7328	0	0	0	0	0	0	0
MTA_Mm_dup13779	1.67769	-3.22432	1.15176	-2.79946	0.00511876	0.0439229	Down	MTA_Mm	ERVL-MaLR	LTR	MTA_Mm:ERVL-MaLR:LTR	NA	2cWT-2cKO	1.16685	0	0	0	0	0	0	0	0	0	0	0	0	0	8.55018	3.49742	1.74048	8.63013	7.96136	2.62492	0.246312	2.61482	0.242904	2.43687	3.50199	1.46004	1.64275	0.143193	1.21964	0	1.0193	0.895879	0	0	7.89493	0
MTA_Mm_dup13924	7.26462	-4.48215	1.17564	-3.81252	0.000137559	0.0025871	Down	MTA_Mm	ERVL-MaLR	LTR	MTA_Mm:ERVL-MaLR:LTR	8cWT-8cKO:8cWT-2cWT	2cWT-2cKO:8cKO-2cKO	0	1.02264	1.66426	0	0	0	0	31.5324	0	0	0	0	0	11.5449	34.3229	0.98365	15.4811	1.05245	12.2198	1.17431	2.46312	66.5327	4.61518	0.393044	22.5528	14.0164	2.73791	16.7536	26.8321	0	0	0.895879	0	0	0	0
MTA_Mm_dup13988	3.22133	-2.78297	0.814295	-3.41764	0.00063167	0.00918365	Down	MTA_Mm	ERVL-MaLR	LTR	MTA_Mm:ERVL-MaLR:LTR	8cWT-8cKO:8cWT-2cWT	2cWT-2cKO:8cKO-2cKO	2.33369	1.02264	0	0	0	0	0	10.5108	8.66229	0	0	0	16.1594	0	5.3744	1.42083	8.79398	6.10424	2.03663	6.35508	6.65042	8.71608	7.16568	5.97427	4.90279	2.33606	4.38066	1.43193	3.90285	0	0	0.895879	4.05877	0	0	0
MTA_Mm_dup13989	4.10642	-3.64885	1.03585	-3.52257	0.000427384	0.00666196	Down	MTA_Mm	ERVL-MaLR	LTR	MTA_Mm:ERVL-MaLR:LTR	8cWT-2cWT	2cWT-2cKO:8cKO-2cKO	0	0.511321	0.832132	2.77932	0	0	0	0	0	0	0	24.2874	0	0	4.0308	2.29518	6.7787	6.73571	0.277722	2.48677	8.62092	16.5606	11.7809	4.16627	5.60318	11.0963	15.0585	13.0305	1.95142	0	0	3.58352	9.47045	0	0	0
MTA_Mm_dup14005	5.25441	-5.00865	1.41188	-3.54751	0.000388895	0.00615882	Down	MTA_Mm	ERVL-MaLR	LTR	MTA_Mm:ERVL-MaLR:LTR	8cWT-2cWT	2cWT-2cKO	0	0	0	0	0	0	11.144	0	0	0	0	0	0	0	12.3367	14.4269	3.29774	2.94687	9.34997	3.66108	0	17.1416	6.55842	7.70367	1.96111	9.63625	4.65445	1.71831	17.8068	0	0	0.895879	0	0	0	64.5887
MTA_Mm_dup14037	5.44696	-3.40807	1.04046	-3.27553	0.00105463	0.0136153	Down	MTA_Mm	ERVL-MaLR	LTR	MTA_Mm:ERVL-MaLR:LTR	NA	2cWT-2cKO:8cKO-2cKO	1.16685	1.02264	0.832132	2.77932	0	0	0	0	0	0	36.8621	0	0	0	44.4609	12.6782	4.94662	10.1036	1.85148	7.73661	2.46312	3.77697	1.94323	2.59409	29.2766	2.04405	6.0234	0.286386	14.1478	0	0	0	0	0	3.15797	6.79881
MTA_Mm_dup1407	5.4239	-3.68104	1.31353	-2.8024	0.00507233	0.0436294	Down	MTA_Mm	ERVL-MaLR	LTR	MTA_Mm:ERVL-MaLR:LTR	8cWT-8cKO:8cWT-2cWT	2cWT-2cKO	0	0	0	0	0	0	0	136.64	0	0	0	0	16.1594	0	26.6277	4.48107	14.8398	0.420982	0.46287	1.65785	0.246312	8.13501	0.121452	1.7294	1.68096	4.81813	3.0117	1.14554	1.7075	0	0	1.79176	0	1.02339	0	0
MTA_Mm_dup14091	4.2761	-2.94494	0.927947	-3.1736	0.0015056	0.0178551	Down	MTA_Mm	ERVL-MaLR	LTR	MTA_Mm:ERVL-MaLR:LTR	8cWT-8cKO	2cWT-2cKO:8cKO-2cKO	4.66739	0.511321	0	0	0	0	0	10.5108	8.66229	0	0	0	16.1594	0	3.78651	2.73236	11.1757	11.156	2.77722	2.00323	7.63567	6.97286	1.45743	9.66889	36.7009	7.15419	3.28549	1.14554	3.65892	0	1.0193	0	0	0	0.789493	0
MTA_Mm_dup14092	17.5411	-2.60416	0.639734	-4.07069	4.68743e-05	0.00102026	Down	MTA_Mm	ERVL-MaLR	LTR	MTA_Mm:ERVL-MaLR:LTR	NA	2cWT-2cKO:8cKO-2cKO	4.66739	2.04528	4.16066	8.33796	0	12.8872	0	0	0	43.6697	36.8621	12.1437	16.1594	0	57.2862	23.8262	53.8631	75.5663	23.7915	33.1569	3.44837	37.1886	24.2904	44.414	38.5219	24.0906	20.2605	22.6245	3.41499	12.0662	1.0193	0	2.70584	1.02339	5.52645	0
MTA_Mm_dup14145	3.28677	-4.90405	1.47924	-3.31526	0.000915581	0.0121497	Down	MTA_Mm	ERVL-MaLR	LTR	MTA_Mm:ERVL-MaLR:LTR	NA	2cWT-2cKO	0	0	0	0	0	0	0	0	0	0	0	0	0	0	21.7419	1.09294	3.48095	0.841964	9.72026	4.35185	0.246312	1.16214	0.121452	8.0181	16.6695	1.16803	25.4626	9.45072	1.7075	0	0	0	0	16.3743	0	0
MTA_Mm_dup14179	10.4312	-3.55525	1.1458	-3.10285	0.00191667	0.0214475	Down	MTA_Mm	ERVL-MaLR	LTR	MTA_Mm:ERVL-MaLR:LTR	NA	2cWT-2cKO	1.16685	2.55661	0	0	5.2858	0	0	0	0	0	36.8621	0	0	0	18.5661	19.7823	32.7942	1.26295	2.31435	19.5488	12.8082	3.48643	6.80132	10.1405	19.7512	58.5475	13.4158	21.4789	8.04963	0	1.0193	0	0	84.9415	0.789493	0
MTA_Mm_dup14186	12.7413	-3.88077	1.14363	-3.39338	0.00069036	0.00981015	Down	MTA_Mm	ERVL-MaLR	LTR	MTA_Mm:ERVL-MaLR:LTR	NA	2cWT-2cKO	2.33369	1.02264	0.832132	2.77932	2.6429	0	0	0	0	0	0	0	0	11.5449	21.4976	12.4596	1.64887	104.404	21.292	10.0162	32.7595	11.6214	2.18614	29.4783	14.7084	3.6501	48.7348	8.44837	1.21964	0	0	0	101.469	11.2573	13.4214	0
MTA_Mm_dup14298	7.12833	-5.57236	1.2145	-4.58818	4.47125e-06	0.000124497	Down	MTA_Mm	ERVL-MaLR	LTR	MTA_Mm:ERVL-MaLR:LTR	8cWT-2cWT	2cWT-2cKO:8cKO-2cKO	0	0	0.832132	0	0	0	0	0	0	0	0	12.1437	0	0	30.4142	2.51377	6.8703	29.2582	4.90642	16.5785	20.6902	0.290536	0.242904	11.8699	11.3464	31.3908	35.8666	24.7724	11.2207	0	0	0	9.47045	3.07018	0	0
MTA_Mm_dup14417	6.11941	-3.64417	1.32097	-2.7587	0.0058032	0.0478851	Down	MTA_Mm	ERVL-MaLR	LTR	MTA_Mm:ERVL-MaLR:LTR	NA	2cWT-2cKO	0	0	0	2.77932	0	2.34313	0	0	0	43.6697	0	0	0	11.5449	18.8104	1.20224	18.6872	32.2051	1.20346	3.10846	0.985248	4.35804	21.2541	6.13149	0	18.1045	2.46412	1.71831	4.87856	0	0	26.8764	0	4.09357	0	0
MTA_Mm_dup14458	6.86816	-5.96111	1.38007	-4.31944	1.56426e-05	0.000381405	Down	MTA_Mm	ERVL-MaLR	LTR	MTA_Mm:ERVL-MaLR:LTR	NA	2cWT-2cKO	0	0	0	0	0	0	0	0	0	0	0	0	0	0	27.3606	7.8692	6.32068	45.2556	7.31334	23.8315	0.246312	5.81072	13.4812	8.33254	21.8524	20.7325	25.4626	1.43193	3.65892	2.41324	0	0	0	32.7485	0	0
MTA_Mm_dup14472	1.53242	-3.54898	1.14269	-3.10581	0.00189758	0.021314	Down	MTA_Mm	ERVL-MaLR	LTR	MTA_Mm:ERVL-MaLR:LTR	NA	2cWT-2cKO:8cKO-2cKO	0	0.511321	0	0	0	0	0	0	0	0	0	0	0	0	4.0308	0.437178	0.366416	3.15736	1.01831	12.6411	1.9705	4.0675	2.91485	13.6779	2.24127	1.31403	2.46412	5.15494	0.731784	0	0	0	0	0	0	0
MTA_Mm_dup1453	3.95554	-4.83361	1.57616	-3.0667	0.00216437	0.0235834	Down	MTA_Mm	ERVL-MaLR	LTR	MTA_Mm:ERVL-MaLR:LTR	NA	2cWT-2cKO:8cKO-2cKO	1.16685	0	0	0	0	0	0	0	0	0	0	0	0	0	0.366436	7.65061	14.7482	0	0.185148	3.38477	8.12829	1.16214	6.80132	5.18819	0.420239	59.1315	0	36.5142	0.487856	0	1.0193	0	0	0	0	0
MTA_Mm_dup1455	5.68137	-3.93567	1.21756	-3.23242	0.00122745	0.015356	Down	MTA_Mm	ERVL-MaLR	LTR	MTA_Mm:ERVL-MaLR:LTR	NA	2cWT-2cKO:8cKO-2cKO	3.50054	0	0	0	0	1.17156	0	0	0	0	0	0	0	0	38.4758	4.0439	9.89323	34.9415	22.1252	5.73338	0.246312	33.9927	17.9749	4.32349	0.700398	3.21208	0.547582	23.77	0.731784	4.82649	0	0	0	0	0	0
MTA_Mm_dup14577	2.5976	-2.92008	1.05238	-2.77473	0.00552481	0.0463333	Down	MTA_Mm	ERVL-MaLR	LTR	MTA_Mm:ERVL-MaLR:LTR	NA	2cWT-2cKO:8cKO-2cKO	1.16685	0.511321	0	0	2.6429	0	0	0	0	0	0	0	16.1594	0	2.80935	1.85801	3.20614	4.42031	3.14751	2.62492	0	9.29715	1.70033	10.6908	1.12064	16.6444	2.46412	7.01645	2.19535	0	0	0	5.41169	1.02339	0	0
MTA_Mm_dup14582	10.6453	-3.44609	0.805726	-4.277	1.89428e-05	0.000451994	Down	MTA_Mm	ERVL-MaLR	LTR	MTA_Mm:ERVL-MaLR:LTR	NA	2cWT-2cKO	5.83423	1.53396	0	0	2.6429	1.17156	11.144	0	8.66229	0	0	0	0	0	67.9129	19.0172	23.6338	21.6806	7.77621	23.6243	11.5767	4.93911	4.73663	22.5607	10.646	39.567	19.1654	16.7536	12.4403	4.82649	0	15.2299	1.35292	2.04678	30.0007	3.39941
MTA_Mm_dup14711	5.44647	-3.57162	0.845575	-4.2239	2.40113e-05	0.000557286	Down	MTA_Mm	ERVL-MaLR	LTR	MTA_Mm:ERVL-MaLR:LTR	NA	2cWT-2cKO:8cKO-2cKO	2.33369	0.511321	1.66426	0	0	1.17156	0	0	0	0	0	0	0	0	32.1243	3.06025	17.7712	15.1553	10.4609	17.4765	3.44837	15.6889	5.10099	7.23202	8.68494	31.2448	1.36896	19.9038	6.0982	0	1.0193	0	0	0	0	0
MTA_Mm_dup14713	6.15027	-5.9236	1.14321	-5.18153	2.20068e-07	7.79321e-06	Down	MTA_Mm	ERVL-MaLR	LTR	MTA_Mm:ERVL-MaLR:LTR	8cWT-2cWT	2cWT-2cKO:8cKO-2cKO	0	0	0	0	0	0	0	0	0	0	0	0	0	11.5449	7.08444	4.91825	4.85501	21.4701	10.8311	1.03615	14.2861	3.1959	0.364356	16.9795	36.7009	21.6086	29.2956	9.02115	31.9546	2.41324	0	0	0	0	0	0
MTA_Mm_dup14773	11.0916	-4.06517	0.953254	-4.26452	2.00335e-05	0.000472961	Down	MTA_Mm	ERVL-MaLR	LTR	MTA_Mm:ERVL-MaLR:LTR	NA	2cWT-2cKO:8cKO-2cKO	0	1.53396	0.832132	2.77932	2.6429	2.34313	0	0	0	0	0	0	0	0	106.144	14.7548	13.191	18.1022	16.0153	6.83861	0.492624	31.6684	13.7241	25.7837	1.26072	37.669	83.5063	17.3263	1.46357	7.23973	2.0386	0.895879	1.35292	0	0.789493	0
MTA_Mm_dup14819	2.06238	-3.73427	1.20392	-3.10177	0.0019237	0.0214992	Down	MTA_Mm	ERVL-MaLR	LTR	MTA_Mm:ERVL-MaLR:LTR	NA	2cWT-2cKO	0	0	0	2.77932	0	0	0	0	0	0	0	0	0	0	0.488582	3.49742	8.79398	1.05245	3.14751	0.967077	0.492624	9.58769	1.82178	2.27966	1.12064	7.00818	13.142	11.169	2.19535	0	0	0	6.76461	0	0	0
MTA_Mm_dup14851	10.9262	-4.52386	1.01218	-4.46942	7.84312e-06	0.000207077	Down	MTA_Mm	ERVL-MaLR	LTR	MTA_Mm:ERVL-MaLR:LTR	NA	2cWT-2cKO:8cKO-2cKO	0	0	0	0	2.6429	4.68626	0	0	0	0	0	0	0	0	30.7807	4.80896	14.8398	41.8877	21.8474	37.6469	6.65042	40.675	0	23.8185	32.6385	58.6935	30.3908	34.939	5.36642	4.82649	0	0.895879	0	2.04678	0.789493	3.39941
MTA_Mm_dup14938	7.08161	-2.31527	0.714483	-3.24048	0.00119328	0.015062	Down	MTA_Mm	ERVL-MaLR	LTR	MTA_Mm:ERVL-MaLR:LTR	NA	2cWT-2cKO:8cKO-2cKO	0	11.2491	0	0	0	4.68626	0	0	0	0	0	0	0	0	32.9793	12.7875	21.2521	24.417	17.2187	10.776	4.43362	14.8173	10.3234	10.3764	11.2064	25.1127	24.915	10.4531	9.5132	0	0	4.4794	0	1.02339	0	0
MTA_Mm_dup14943	20.5956	-3.62418	0.77637	-4.6681	3.03994e-06	8.75111e-05	Down	MTA_Mm	ERVL-MaLR	LTR	MTA_Mm:ERVL-MaLR:LTR	NA	2cWT-2cKO:8cKO-2cKO	1.16685	9.7151	0	8.33796	2.6429	0	0	0	25.9869	0	0	0	0	11.5449	61.4392	19.4544	31.6034	55.9906	38.9736	27.2854	12.8082	103.431	83.0733	22.4035	12.327	50.3713	25.1888	74.8898	46.8342	4.82649	1.0193	25.0846	4.05877	0	1.57899	0
MTA_Mm_dup14944	5.73149	-5.22271	1.08349	-4.82024	1.43382e-06	4.39706e-05	Down	MTA_Mm	ERVL-MaLR	LTR	MTA_Mm:ERVL-MaLR:LTR	8cWT-8cKO:8cWT-2cWT	2cWT-2cKO:8cKO-2cKO	0	0	0	0	0	0	0	0	0	0	0	0	80.7971	0	4.51938	11.0387	19.42	12.8399	3.70296	13.8845	9.35985	16.8511	0.728713	8.41115	5.88334	4.96413	2.19033	8.44837	9.02534	0	0	0	0	0	0	0
MTA_Mm_dup14961	2.36646	-3.95697	1.23361	-3.20763	0.00133835	0.0163733	Down	MTA_Mm	ERVL-MaLR	LTR	MTA_Mm:ERVL-MaLR:LTR	NA	2cWT-2cKO	0	0.511321	0	0	0	0	0	0	0	0	0	0	0	0	2.07647	2.95095	1.19085	4.84129	2.40692	4.90446	11.823	11.3309	2.06469	7.54645	0.700398	1.89805	18.6178	1.14554	1.7075	0	0	0	0	0	11.8424	0
MTA_Mm_dup15042	2.82698	-2.98289	0.982331	-3.03655	0.00239305	0.0251835	Down	MTA_Mm	ERVL-MaLR	LTR	MTA_Mm:ERVL-MaLR:LTR	8cWT-8cKO	2cWT-2cKO:8cKO-2cKO	0	1.02264	0.832132	0	0	0	0	0	0	0	36.8621	0	0	0	4.76367	5.79261	3.93897	13.8924	1.66633	5.31892	1.23156	2.03375	8.25875	4.4021	2.66151	7.00818	0.547582	0.572771	2.43928	0	0	0	1.35292	0	0	0
MTA_Mm_dup15209	7.3804	-2.97059	0.897066	-3.31146	0.00092812	0.0122737	Down	MTA_Mm	ERVL-MaLR	LTR	MTA_Mm:ERVL-MaLR:LTR	NA	2cWT-2cKO	0	3.06793	1.66426	2.77932	0	2.34313	0	0	0	0	0	0	16.1594	11.5449	15.0239	22.2961	15.6643	22.5225	2.4995	0.621692	19.4586	2.03375	4.12937	9.35446	13.0274	17.9585	16.1537	25.4883	17.8068	0	0	14.3341	1.35292	0	15.7899	0
MTA_Mm_dup15226	2.85087	-4.25828	1.36746	-3.11399	0.00184573	0.0208742	Down	MTA_Mm	ERVL-MaLR	LTR	MTA_Mm:ERVL-MaLR:LTR	NA	2cWT-2cKO	0	0	0	0	0	1.17156	0	0	0	0	0	0	0	0	1.09931	0.765061	23.7254	11.3665	11.1089	1.796	0.985248	20.6281	7.77294	1.88661	1.82103	2.33606	10.9516	0.143193	0	0	7.1351	0	0	0	0.789493	0
MTA_Mm_dup15273	2.73536	-3.15785	1.06455	-2.96638	0.00301332	0.0295992	Down	MTA_Mm	ERVL-MaLR	LTR	MTA_Mm:ERVL-MaLR:LTR	8cWT-2cWT	2cWT-2cKO:8cKO-2cKO	1.16685	0.511321	0	0	0	0	0	0	0	0	36.8621	0	0	0	1.83218	0.437178	3.57256	4.20982	4.07325	2.07231	4.1873	4.35804	4.12937	2.27966	0.840478	6.13216	14.5109	0	6.82999	2.41324	0	0	0	0	0.789493	0
MTA_Mm_dup15369	1.88429	-3.194	1.15392	-2.76796	0.00564088	0.0469474	Down	MTA_Mm	ERVL-MaLR	LTR	MTA_Mm:ERVL-MaLR:LTR	NA	2cWT-2cKO:8cKO-2cKO	1.16685	0	0.832132	0	0	0	0	0	0	0	0	0	0	0	2.19862	0.655767	15.4811	0.631473	0.833165	1.45062	1.23156	14.2363	5.34389	1.65079	11.9068	6.42417	0.821373	1.43193	0.487856	0	2.0386	0.895879	0	0	0	0
MTA_Mm_dup15382	3.61802	-5.00737	1.5628	-3.2041	0.00135486	0.016495	Down	MTA_Mm	ERVL-MaLR	LTR	MTA_Mm:ERVL-MaLR:LTR	NA	2cWT-2cKO:8cKO-2cKO	0	0	0	0	0	0	0	10.5108	0	0	0	0	0	0	1.83218	0.437178	4.39699	0.631473	0.185148	6.42415	0	27.3104	14.0885	6.68175	0	11.9723	1.09516	17.6127	20.49	0	0	0	0	0	0	10.1982
MTA_Mm_dup15471	3.9792	-5.12768	1.28299	-3.99667	6.42397e-05	0.00135206	Down	MTA_Mm	ERVL-MaLR	LTR	MTA_Mm:ERVL-MaLR:LTR	8cWT-8cKO:8cWT-2cWT	2cWT-2cKO:8cKO-2cKO	0	0	0	0	0	0	0	0	0	0	0	24.2874	0	0	9.64949	14.3176	1.28246	0.210491	2.86979	10.5688	21.9218	0.581072	16.1531	0.786089	6.58374	0.438011	2.46412	11.4554	23.661	0	0	0	0	0	0	0
MTA_Mm_dup15494	2.43728	-4.43241	1.4812	-2.99246	0.00276742	0.0280006	Down	MTA_Mm	ERVL-MaLR	LTR	MTA_Mm:ERVL-MaLR:LTR	NA	2cWT-2cKO	0	0	0	0	0	0	0	0	0	0	0	0	0	0	10.9931	0	18.5956	3.36786	0.740591	5.52615	0.985248	5.52018	0.364356	2.35827	3.92223	1.75205	8.48752	12.7442	0.487856	0	0	14.3341	0	0	0	0
MTA_Mm_dup15495	9.19379	-6.40971	1.22432	-5.23534	1.64682e-07	6.03542e-06	Down	MTA_Mm	ERVL-MaLR	LTR	MTA_Mm:ERVL-MaLR:LTR	8cWT-8cKO:8cWT-2cWT	2cWT-2cKO:8cKO-2cKO	0	0	0	0	0	0	0	0	0	0	0	24.2874	16.1594	0	34.8115	0.327883	29.9545	0.210491	21.0143	2.97031	7.63567	3.1959	17.8535	20.2025	16.2492	83.2222	12.0468	18.7583	30.2471	0	0	0	0	1.02339	0	0
MTA_Mm_dup15498	4.83961	-4.45734	1.2123	-3.67675	0.000236226	0.00408147	Down	MTA_Mm	ERVL-MaLR	LTR	MTA_Mm:ERVL-MaLR:LTR	NA	2cWT-2cKO:8cKO-2cKO	0	0	0	5.55864	0	0	0	0	0	0	0	0	0	11.5449	8.0616	8.85285	6.50388	24.6274	6.20245	0.552615	34.73	22.3713	2.67195	1.65079	0	7.15419	10.6779	10.4531	16.0993	0	0	0	1.35292	0	0	0
MTA_Mm_dup15506	22.0873	-3.03956	0.989482	-3.07187	0.00212723	0.0232639	Down	MTA_Mm	ERVL-MaLR	LTR	MTA_Mm:ERVL-MaLR:LTR	NA	2cWT-2cKO	2.33369	0	0.832132	8.33796	5.2858	10.5441	0	0	0	0	73.7243	0	0	0	28.3377	17.1592	56.3365	75.7767	14.1638	30.9465	34.9763	23.2429	26.8409	39.6189	34.7397	60.4456	55.032	23.6268	15.3675	19.3059	60.1387	0	100.116	0	0	0
MTA_Mm_dup15577	5.47212	-3.18466	0.859904	-3.7035	0.000212644	0.0037172	Down	MTA_Mm	ERVL-MaLR	LTR	MTA_Mm:ERVL-MaLR:LTR	8cWT-8cKO	2cWT-2cKO:8cKO-2cKO	1.16685	2.04528	0	2.77932	0	1.17156	0	21.0216	8.66229	0	0	0	0	0	1.09931	13.006	10.5345	23.7855	6.57275	3.592	0.492624	3.77697	11.6594	9.98333	20.7318	16.7904	3.0117	19.1878	17.5628	0	1.0193	1.79176	0	1.02339	0	0
MTA_Mm_dup1622	3.60166	-2.92012	1.05509	-2.76765	0.00564616	0.0469584	Down	MTA_Mm	ERVL-MaLR	LTR	MTA_Mm:ERVL-MaLR:LTR	NA	2cWT-2cKO	0	0.511321	0	2.77932	2.6429	0	0	10.5108	0	0	0	0	0	0	6.47371	3.60672	4.4886	10.1036	1.66633	3.73015	3.44837	8.13501	2.7934	3.22296	2.66151	5.69415	6.0234	7.30283	0.487856	0	0	0	4.05877	0	5.52645	37.3935
MTA_Mm_dup1739	34.0821	-6.02675	0.918829	-6.55916	5.411e-11	3.69471e-09	Down	MTA_Mm	ERVL-MaLR	LTR	MTA_Mm:ERVL-MaLR:LTR	8cWT-2cWT	2cWT-2cKO:8cKO-2cKO	1.16685	0	1.66426	2.77932	2.6429	0	0	0	8.66229	43.6697	0	12.1437	16.1594	0	94.907	67.1068	34.8095	58.0955	60.8211	57.4029	37.6857	230.105	19.1894	56.0481	103.799	82.3462	27.9267	24.7724	99.0348	4.82649	2.0386	21.5011	0	54.2398	0	3.39941
MTA_Mm_dup1764	3.43142	-5.04152	1.49703	-3.36768	0.00075804	0.0105529	Down	MTA_Mm	ERVL-MaLR	LTR	MTA_Mm:ERVL-MaLR:LTR	NA	2cWT-2cKO:8cKO-2cKO	0	0	0	0	0	0	0	0	8.66229	0	0	0	0	0	4.76367	1.09294	12.6414	4.42031	2.86979	15.4732	0	45.3236	0.485809	9.27585	0	0.292008	0.273791	11.169	7.8057	2.41324	0	0	0	0	0	0
MTA_Mm_dup228	3.34117	-3.51953	1.15414	-3.04947	0.00229245	0.0244246	Down	MTA_Mm	ERVL-MaLR	LTR	MTA_Mm:ERVL-MaLR:LTR	8cWT-8cKO	2cWT-2cKO:8cKO-2cKO	0	0.511321	0	5.55864	0	0	0	10.5108	0	0	0	0	0	0	9.4052	24.482	3.75576	11.7875	4.99899	10.2234	0.492624	4.0675	0.242904	1.41496	0.560318	1.02203	15.0585	5.8709	13.66	0	0	0	0	0	0	0
MTA_Mm_dup2410	3.04071	-4.22275	1.54129	-2.73975	0.0061486	0.0497914	Down	MTA_Mm	ERVL-MaLR	LTR	MTA_Mm:ERVL-MaLR:LTR	NA	2cWT-2cKO	0	0.511321	0	0	0	0	0	0	0	0	0	0	0	0	7.45087	2.95095	11.1757	17.0498	11.4792	9.39446	0	0.290536	0	1.88661	0.420239	16.9364	9.03511	1.00235	0.487856	0	2.0386	0	0	0	0	20.3964
MTA_Mm_dup2784	15.285	-5.82286	1.70453	-3.41611	0.000635229	0.00920257	Down	MTA_Mm	ERVL-MaLR	LTR	MTA_Mm:ERVL-MaLR:LTR	NA	2cWT-2cKO:8cWT-8cKO	0	0	0.832132	0	0	0	0	0	0	0	0	0	16.1594	0	16.2453	6.77626	12.3665	0.841964	4.90642	9.46354	0.246312	0	0.364356	19.6522	9.24525	2.62807	44.3542	0.286386	19.0264	0	0	86.0044	0	0	0	316.145
MTA_Mm_dup2818	10.6327	-5.03029	0.884185	-5.68918	1.27651e-08	5.91769e-07	Down	MTA_Mm	ERVL-MaLR	LTR	MTA_Mm:ERVL-MaLR:LTR	NA	2cWT-2cKO:8cKO-2cKO	0	0.511321	0	0	0	3.51469	0	693.713	0	0	0	0	0	0	14.0467	26.4493	28.5804	22.1016	16.8485	14.0917	29.5574	83.3838	29.0271	12.8919	6.30358	19.1265	52.0203	20.4766	5.61035	4.82649	0	2.68764	1.35292	0	0	0
MTA_Mm_dup2911	5.09352	-5.21989	1.15012	-4.53857	5.66376e-06	0.000154567	Down	MTA_Mm	ERVL-MaLR	LTR	MTA_Mm:ERVL-MaLR:LTR	NA	2cWT-2cKO:8cKO-2cKO	0	0	0	0	0	1.17156	0	0	0	0	0	0	0	0	5.86298	4.48107	4.39699	1.26295	7.03562	19.5488	5.41886	61.5936	5.34389	0.628871	3.50199	9.92826	22.9985	19.6174	14.8796	0	0	0	0	0	0.789493	0
MTA_Mm_dup2921	4.32435	-4.34024	1.23732	-3.50777	0.000451878	0.00695269	Down	MTA_Mm	ERVL-MaLR	LTR	MTA_Mm:ERVL-MaLR:LTR	NA	2cWT-2cKO:8cKO-2cKO	0	0.511321	0	0	0	1.17156	0	10.5108	8.66229	0	0	0	0	0	10.3824	20.0009	6.32068	40.6248	8.42423	14.5752	0.246312	4.0675	10.9307	1.41496	9.80557	0.438011	6.0234	0.286386	0	0	1.0193	0	0	0	0	0
MTA_Mm_dup2925	4.40277	-4.22539	1.3746	-3.0739	0.00211282	0.0231631	Down	MTA_Mm	ERVL-MaLR	LTR	MTA_Mm:ERVL-MaLR:LTR	NA	2cWT-2cKO	0	1.53396	0	0	0	0	0	0	8.66229	0	0	0	0	0	1.95433	0.546472	6.68709	0.210491	10.4609	6.35508	45.814	0.581072	11.0521	5.18819	0	37.085	5.47582	4.0094	2.19535	9.65297	2.0386	0	0	0	0	3.39941
MTA_Mm_dup2955	5.73061	-5.757	1.30338	-4.41699	1.00085e-05	0.000257766	Down	MTA_Mm	ERVL-MaLR	LTR	MTA_Mm:ERVL-MaLR:LTR	NA	2cWT-2cKO	0	0	0	0	0	0	0	0	0	0	0	0	0	0	54.8433	28.963	14.9315	1.05245	0.648017	9.25631	1.23156	9.87822	3.52211	16.6651	1.54088	27.5947	1.36896	16.8967	1.46357	7.23973	13.2509	0.895879	0	0	0.789493	0
MTA_Mm_dup2961	4.09314	-5.42044	1.58175	-3.42688	0.00061057	0.00892502	Down	MTA_Mm	ERVL-MaLR	LTR	MTA_Mm:ERVL-MaLR:LTR	NA	2cWT-2cKO:8cKO-2cKO	0	0	0	0	0	0	0	0	0	0	0	0	0	0	0.122145	44.3736	3.38935	0.420982	11.3866	19.756	0	2.32429	7.04423	0.157218	0	25.4047	9.3089	17.4695	9.26927	0	1.0193	0	0	0	0	0
MTA_Mm_dup3058	6.99874	-2.24485	0.770753	-2.91254	0.00358507	0.0337658	Down	MTA_Mm	ERVL-MaLR	LTR	MTA_Mm:ERVL-MaLR:LTR	NA	2cWT-2cKO:8cKO-2cKO	3.50054	2.04528	0	11.1173	0	2.34313	0	0	0	0	0	0	16.1594	11.5449	14.9017	11.3666	21.0689	21.8911	3.61038	6.42415	0.246312	15.9795	4.49373	24.2901	24.0937	26.4267	3.0117	11.169	10.0011	2.41324	0	0.895879	0	0	0.789493	0
MTA_Mm_dup3073	2.81316	-4.88699	1.5962	-3.06164	0.00220129	0.0238402	Down	MTA_Mm	ERVL-MaLR	LTR	MTA_Mm:ERVL-MaLR:LTR	NA	2cWT-2cKO:8cKO-2cKO	0	0	0	0	0	0	0	0	0	0	0	0	0	0	1.3436	15.4105	1.00764	1.89442	0	8.98	0	0.871608	2.06469	1.65079	0.14008	21.6086	34.2239	8.30518	6.58606	0	0	0	0	0	0	0
MTA_Mm_dup3122	10.7791	-6.82625	2.20666	-3.09347	0.0019783	0.0219854	Down	MTA_Mm	ERVL-MaLR	LTR	MTA_Mm:ERVL-MaLR:LTR	NA	2cWT-2cKO:8cKO-2cKO	0	0	0	0	0	0	0	0	0	0	0	0	0	0	2.56505	36.7229	163.88	0.631473	0.370296	0.0690769	0	0	0	0.70748	40.2028	61.6136	88.1607	0	3.90285	0	0	0	0	0	0	0
MTA_Mm_dup3198	7.47732	-2.53776	0.813001	-3.12146	0.00179954	0.0204966	Down	MTA_Mm	ERVL-MaLR	LTR	MTA_Mm:ERVL-MaLR:LTR	NA	2cWT-2cKO	4.66739	0.511321	1.66426	0	0	7.02939	0	0	0	0	0	0	0	0	8.79447	2.84166	16.6719	38.0989	8.05393	9.67077	5.41886	18.8848	2.67195	17.8442	12.327	36.647	16.7013	10.1667	10.7328	9.65297	14.2702	0.895879	0	2.04678	0	20.3964
MTA_Mm_dup3390	8.19759	-4.97916	1.39801	-3.56161	0.000368583	0.00588941	Down	MTA_Mm	ERVL-MaLR	LTR	MTA_Mm:ERVL-MaLR:LTR	NA	2cWT-2cKO	0	0	0	2.77932	0	1.17156	0	0	8.66229	0	0	0	0	0	17.7111	10.383	31.6034	12.8399	13.4232	14.9206	0.246312	40.675	11.538	22.5607	3.08175	29.4928	7.39236	19.331	0	0	0	0	0	1.02339	54.475	0
MTA_Mm_dup3414	1.52283	-2.87695	0.911955	-3.1547	0.00160663	0.0186566	Down	MTA_Mm	ERVL-MaLR	LTR	MTA_Mm:ERVL-MaLR:LTR	NA	2cWT-2cKO:8cKO-2cKO	2.33369	0	0	0	0	0	0	0	0	0	0	0	0	0	4.64153	4.48107	2.74812	2.94687	1.94405	3.31569	0.985248	6.97286	3.52211	3.61601	5.32302	3.21208	4.65445	2.0047	0.243928	0	0	0	0	0	0	3.39941
MTA_Mm_dup3452	1.9569	-4.32583	1.26716	-3.41379	0.000640654	0.00925862	Down	MTA_Mm	ERVL-MaLR	LTR	MTA_Mm:ERVL-MaLR:LTR	NA	2cWT-2cKO:8cKO-2cKO	0	0	0	0	0	0	0	0	0	0	0	0	0	0	4.51938	13.3339	6.13747	5.68326	1.94405	1.65785	0.246312	13.9457	0.728713	5.97427	0	6.13216	0.821373	8.87795	0.487856	0	1.0193	0.895879	0	0	0	0
MTA_Mm_dup3501	3.1009	-2.87504	0.996146	-2.88616	0.00389974	0.0358776	Down	MTA_Mm	ERVL-MaLR	LTR	MTA_Mm:ERVL-MaLR:LTR	NA	2cWT-2cKO	0	1.53396	0	0	2.6429	0	0	0	0	0	0	0	0	0	3.54222	8.19709	3.75576	5.05178	2.31435	7.25308	6.40411	3.1959	3.88647	3.93044	0.840478	7.15419	7.93994	9.45072	1.7075	16.8927	1.0193	0	0	1.02339	0	16.997
MTA_Mm_dup3532	2.71863	-4.84035	1.66842	-2.90117	0.00371776	0.0346861	Down	MTA_Mm	ERVL-MaLR	LTR	MTA_Mm:ERVL-MaLR:LTR	NA	2cWT-2cKO:8cKO-2cKO	0	0	0	0	0	0	0	0	0	0	0	0	0	0	22.5969	0.546472	5.77105	0.210491	11.294	12.7102	1.9705	0	6.55842	0.0786089	1.12064	0	6.84478	30.6433	0.243928	0	0	0	0	0	0	0
MTA_Mm_dup3542	5.45315	-5.38275	1.68463	-3.19521	0.00139728	0.0169076	Down	MTA_Mm	ERVL-MaLR	LTR	MTA_Mm:ERVL-MaLR:LTR	8cWT-2cWT	2cWT-2cKO	0	0	0	0	0	0	0	31.5324	0	0	0	0	0	0	15.5125	13.9897	29.4049	0.631473	9.16482	0.0690769	1.47787	34.2833	8.3802	0	3.50199	0.146004	0.273791	6.44368	23.4171	0	0	0	0	23.538	0	0
MTA_Mm_dup356	3.32576	-4.23793	1.54365	-2.7454	0.00604378	0.0492886	Down	MTA_Mm	ERVL-MaLR	LTR	MTA_Mm:ERVL-MaLR:LTR	NA	2cWT-2cKO:8cKO-2cKO	0	1.02264	0	0	0	0	0	0	0	0	0	0	0	0	9.77164	2.40448	20.9773	38.7303	0.46287	6.07877	0	16.5606	0.485809	0.314435	0.14008	16.9364	0	0.572771	0.243928	2.41324	0	0	1.35292	0	0	0
MTA_Mm_dup3579	2.79402	-3.92682	1.24126	-3.16357	0.00155845	0.0182754	Down	MTA_Mm	ERVL-MaLR	LTR	MTA_Mm:ERVL-MaLR:LTR	NA	2cWT-2cKO:8cKO-2cKO	0	0.511321	0	0	0	1.17156	0	0	0	0	0	0	0	0	10.1381	4.0439	9.252	1.89442	1.29603	8.56554	0	12.493	4.61518	9.98333	0.700398	19.1265	12.8682	0	5.36642	0	0	0	1.35292	0	0	0
MTA_Mm_dup3688	8.95948	-3.87519	0.838249	-4.62296	3.78311e-06	0.000106332	Down	MTA_Mm	ERVL-MaLR	LTR	MTA_Mm:ERVL-MaLR:LTR	NA	2cWT-2cKO	1.16685	1.53396	0	5.55864	0	0	0	0	0	0	0	0	16.1594	11.5449	8.18375	20.8752	23.9086	33.0471	8.79452	15.0588	10.5914	27.0199	1.57888	9.27585	13.4476	26.1347	8.76131	18.4719	18.2946	24.1324	1.0193	13.4382	0	1.02339	7.89493	0
MTA_Mm_dup3703	3.88356	-3.905	1.31641	-2.96639	0.00301319	0.0295992	Down	MTA_Mm	ERVL-MaLR	LTR	MTA_Mm:ERVL-MaLR:LTR	NA	2cWT-2cKO	0	1.53396	0	0	0	0	0	0	0	0	0	12.1437	0	0	3.29793	2.40448	2.47331	1.05245	8.5168	12.2957	14.7787	2.32429	6.92277	16.1148	4.62263	32.5589	0.821373	0.572771	1.95142	19.3059	0	0	0	0	0	0
MTA_Mm_dup3705	4.19381	-2.46528	0.761241	-3.2385	0.00120158	0.0151367	Down	MTA_Mm	ERVL-MaLR	LTR	MTA_Mm:ERVL-MaLR:LTR	NA	2cWT-2cKO	0	1.53396	3.32853	2.77932	0	0	0	0	0	0	0	0	0	11.5449	8.91662	3.16954	7.60313	13.0504	10.1831	6.76954	4.43362	15.9795	1.70033	2.6727	5.74326	12.2643	7.39236	5.44133	6.82999	4.82649	1.0193	12.5423	1.35292	4.09357	0	0
MTA_Mm_dup3711	4.69079	-4.31963	1.29296	-3.34089	0.000835113	0.0112832	Down	MTA_Mm	ERVL-MaLR	LTR	MTA_Mm:ERVL-MaLR:LTR	8cWT-8cKO:8cWT-2cWT	2cWT-2cKO:8cKO-2cKO	0	0	0	0	0	0	0	21.0216	77.9606	0	0	0	0	0	1.71004	1.42083	3.57256	13.8924	6.57275	1.45062	25.3701	3.1959	0.485809	7.31062	0.980557	0.584015	2.46412	1.14554	0.243928	0	1.0193	0	0	0	3.15797	0
MTA_Mm_dup3793	6.67683	-3.20878	0.917725	-3.49645	0.000471491	0.00718018	Down	MTA_Mm	ERVL-MaLR	LTR	MTA_Mm:ERVL-MaLR:LTR	NA	2cWT-2cKO:8cKO-2cKO	4.66739	0.511321	0	0	0	2.34313	0	0	0	0	0	12.1437	0	11.5449	21.9862	14.3176	7.69474	29.2582	1.38861	7.25308	3.94099	9.87822	5.8297	10.6908	9.66549	21.4626	35.319	4.0094	3.65892	0	0	7.16703	0	14.3275	0	3.39941
MTA_Mm_dup3985	6.00455	-5.6435	1.23502	-4.56955	4.88781e-06	0.000135434	Down	MTA_Mm	ERVL-MaLR	LTR	MTA_Mm:ERVL-MaLR:LTR	8cWT-2cWT	2cWT-2cKO:8cKO-2cKO	0	0	0	0	0	0	0	10.5108	0	0	0	0	32.3188	0	17.3447	15.957	19.0536	17.4707	1.7589	4.35185	17.7345	33.4116	0	16.272	4.48255	12.4103	9.58269	6.0141	0	0	1.0193	0.895879	0	0	1.57899	0
MTA_Mm_dup4008	2.06599	-4.14688	1.40335	-2.95499	0.00312679	0.0304789	Down	MTA_Mm	ERVL-MaLR	LTR	MTA_Mm:ERVL-MaLR:LTR	8cWT-2cWT	2cWT-2cKO:8cKO-2cKO	0	0	0	0	0	0	0	0	0	0	0	0	0	11.5449	0.977164	0.546472	0.366416	0.210491	4.07325	0.276308	0.246312	15.3984	9.71617	7.78228	0.840478	11.0963	10.4041	0	0.487856	0	0	0.895879	0	0	1.57899	0
MTA_Mm_dup404	8.77832	-4.88701	1.70044	-2.87397	0.00405341	0.0369675	Down	MTA_Mm	ERVL-MaLR	LTR	MTA_Mm:ERVL-MaLR:LTR	NA	2cWT-2cKO	0	0	0	0	0	0	0	0	0	0	0	0	0	23.0898	5.61869	0.98365	11.6337	0.420982	0.185148	11.9503	2.70943	2.61482	16.396	22.0105	13.8679	0.146004	0	15.3216	0	43.4384	2.0386	0	0	0	152.372	0
MTA_Mm_dup4049	2.55478	-4.31202	1.31567	-3.27743	0.00104757	0.0135682	Down	MTA_Mm	ERVL-MaLR	LTR	MTA_Mm:ERVL-MaLR:LTR	8cWT-2cWT	2cWT-2cKO	0	0	0	0	0	0	0	0	0	0	0	12.1437	0	0	7.45087	2.40448	2.56491	8.63013	4.2584	1.93415	12.5619	4.93911	2.91485	9.59028	0.560318	0.730019	0	9.59392	1.7075	0	0	12.5423	0	0	0	0
MTA_Mm_dup4079	4.29201	-5.25799	1.66326	-3.16127	0.00157085	0.0183726	Down	MTA_Mm	ERVL-MaLR	LTR	MTA_Mm:ERVL-MaLR:LTR	NA	2cWT-2cKO	0	0	0	0	0	0	0	0	8.66229	0	0	0	0	0	15.6346	1.63942	17.2216	10.735	8.1465	12.0885	25.3701	0	28.1769	5.03097	0	0	0.273791	0.143193	10.0011	0	0	0	1.35292	14.3275	0	0
MTA_Mm_dup4081	5.57704	-4.4957	1.25642	-3.57819	0.000345983	0.00559847	Down	MTA_Mm	ERVL-MaLR	LTR	MTA_Mm:ERVL-MaLR:LTR	NA	2cWT-2cKO	0	1.02264	0	0	0	1.17156	0	0	0	0	0	0	0	0	14.291	4.91825	7.87794	28.4163	6.94304	17.96	13.5472	0.581072	6.67987	16.4293	7.5643	54.8974	4.10687	0.143193	0.487856	0	1.0193	0.895879	0	17.3977	0	0
MTA_Mm_dup4147	4.12164	-2.978	0.932679	-3.19295	0.00140826	0.0170058	Down	MTA_Mm	ERVL-MaLR	LTR	MTA_Mm:ERVL-MaLR:LTR	8cWT-2cWT	2cWT-2cKO	0	1.02264	0	0	2.6429	1.17156	0	0	0	0	0	0	0	34.6347	8.79447	2.40448	4.6718	5.26227	1.94405	6.42415	11.5767	6.97286	4.85809	1.17913	1.68096	15.6224	6.29719	5.15494	4.63463	0	0	5.37527	0	12.2807	7.89493	0
MTA_Mm_dup4207	3.51997	-4.2527	1.51537	-2.80638	0.00501021	0.0433038	Down	MTA_Mm	ERVL-MaLR	LTR	MTA_Mm:ERVL-MaLR:LTR	NA	2cWT-2cKO	0	0	0	0	2.6429	0	0	0	0	0	0	0	0	0	3.29793	6.44837	0.091604	32.6261	1.94405	11.4668	0.492624	0.871608	0.364356	3.69462	0.840478	21.4626	11.4992	1.00235	0.243928	0	0	30.4599	0	0	0.789493	0
MTA_Mm_dup4238	3.92973	-4.88185	1.36194	-3.58447	0.000337762	0.00547537	Down	MTA_Mm	ERVL-MaLR	LTR	MTA_Mm:ERVL-MaLR:LTR	8cWT-2cWT	2cWT-2cKO:8cKO-2cKO	0	0	0	0	0	0	0	0	0	0	36.8621	0	0	0	42.3845	6.22979	9.43521	4.20982	0.740591	1.93415	0	4.35804	12.3881	14.9357	0.420239	3.9421	0.547582	0.429578	1.46357	2.41324	0	0	2.70584	0	0	0
MTA_Mm_dup4259	1.80864	-4.24713	1.41031	-3.01148	0.00259975	0.0267437	Down	MTA_Mm	ERVL-MaLR	LTR	MTA_Mm:ERVL-MaLR:LTR	NA	2cWT-2cKO:8cKO-2cKO	0	0	0	0	0	0	0	0	0	0	0	0	0	0	7.20658	0.218589	1.37406	8.84062	0.925739	7.59846	2.95574	13.6552	0.242904	0.0786089	0	10.0743	2.46412	3.72301	7.56177	0	0	0	0	0	0	0
MTA_Mm_dup4318	12.8411	-3.99176	1.08959	-3.66355	0.000248745	0.00426066	Down	MTA_Mm	ERVL-MaLR	LTR	MTA_Mm:ERVL-MaLR:LTR	NA	2cWT-2cKO	2.33369	0	2.4964	5.55864	0	0	33.432	0	8.66229	0	0	0	0	0	28.4599	10.0551	40.0309	42.7297	4.16583	21.9665	0	36.317	3.64356	6.28871	30.9576	55.6275	8.48752	9.16434	78.3009	0	3.0579	1.79176	1.35292	36.8421	0	3.39941
MTA_Mm_dup4476	4.04746	-4.29726	1.33392	-3.22154	0.00127506	0.0157927	Down	MTA_Mm	ERVL-MaLR	LTR	MTA_Mm:ERVL-MaLR:LTR	NA	2cWT-2cKO	0	0	0	2.77932	0	0	0	0	8.66229	0	0	0	0	0	7.93945	7.21344	4.4886	7.57767	19.8108	4.49	0.492624	0.581072	5.5868	6.68175	0.280159	16.0604	2.73791	0.143193	14.6357	0	1.0193	0	36.5289	2.04678	0	0
MTA_Mm_dup4546	1.77959	-3.97421	1.45074	-2.73943	0.00615457	0.0498171	Down	MTA_Mm	ERVL-MaLR	LTR	MTA_Mm:ERVL-MaLR:LTR	8cWT-2cWT	2cWT-2cKO:8cKO-2cKO	0	0	0	0	0	0	0	10.5108	0	0	0	0	0	0	0.488582	1.42083	6.68709	0.631473	0.277722	1.93415	0.985248	0.290536	3.40066	0.628871	0	14.4544	0.547582	1.14554	22.4414	0	0	0	0	0	0	0
MTA_Mm_dup4597	4.60145	-5.11611	1.1282	-4.53476	5.767e-06	0.000156904	Down	MTA_Mm	ERVL-MaLR	LTR	MTA_Mm:ERVL-MaLR:LTR	8cWT-8cKO:8cWT-2cWT	2cWT-2cKO:8cKO-2cKO	0	0	0	0	0	0	0	0	0	0	36.8621	0	0	11.5449	9.4052	5.13684	4.12218	13.8924	5.83216	0.345385	12.3156	0.290536	2.42904	20.3597	19.8913	11.0963	9.03511	5.01175	2.68321	0	0	0	0	0	0	0
MTA_Mm_dup4669	2.48724	-3.70858	1.26795	-2.92486	0.00344606	0.0327854	Down	MTA_Mm	ERVL-MaLR	LTR	MTA_Mm:ERVL-MaLR:LTR	NA	2cWT-2cKO:8cKO-2cKO	0	0.511321	0.832132	0	0	0	0	0	0	0	0	0	0	0	1.71004	6.44837	0.274812	23.154	2.96237	5.04261	8.62092	19.4659	0.121452	0.550262	0.14008	9.63625	3.83308	2.43428	1.46357	4.82649	0	0	0	0	0	0
MTA_Mm_dup4771	2.52467	-3.244	0.948611	-3.41974	0.000626816	0.00912513	Down	MTA_Mm	ERVL-MaLR	LTR	MTA_Mm:ERVL-MaLR:LTR	8cWT-2cWT	2cWT-2cKO	0	0.511321	0	2.77932	0	0	0	0	8.66229	0	0	0	0	0	3.90865	3.49742	6.9619	8.20915	4.2584	5.388	1.23156	5.52018	1.33597	5.42401	0.700398	2.62807	6.29719	3.00705	4.39071	12.0662	0	2.68764	0	0	3.94747	0
MTA_Mm_dup4808	4.14389	-4.58725	1.31691	-3.48333	0.000495222	0.00747144	Down	MTA_Mm	ERVL-MaLR	LTR	MTA_Mm:ERVL-MaLR:LTR	8cWT-2cWT	2cWT-2cKO	0	0	0.832132	0	0	0	0	0	8.66229	0	0	12.1437	0	0	0.977164	1.53012	2.1985	13.4714	0.370296	1.51969	57.1444	3.1959	1.45743	2.6727	3.64207	0.584015	21.3557	8.87795	2.19535	0	1.0193	0	0	0	9.47392	0
MTA_Mm_dup4967	9.25936	-5.45754	1.44375	-3.78012	0.000156752	0.00289021	Down	MTA_Mm	ERVL-MaLR	LTR	MTA_Mm:ERVL-MaLR:LTR	NA	2cWT-2cKO	0	0	0	0	2.6429	0	0	10.5108	0	0	0	0	0	11.5449	1.09931	0.327883	6.68709	42.9402	1.48118	9.46354	6.1578	82.8028	10.9307	1.96522	1.12064	7.4462	17.2488	32.2184	0	2.41324	6.1158	23.2929	0	0	0	0
MTA_Mm_dup4971	5.70172	-4.29832	1.39566	-3.07977	0.00207163	0.0228238	Down	MTA_Mm	ERVL-MaLR	LTR	MTA_Mm:ERVL-MaLR:LTR	NA	2cWT-2cKO	0	0	1.66426	0	0	0	0	0	0	0	0	0	16.1594	0	9.64949	4.48107	16.8551	2.94687	2.96237	12.0194	0.985248	19.4659	1.45743	5.58123	9.24525	27.8867	17.7964	0.572771	6.58606	0	0	54.6486	0	0	0	0
MTA_Mm_dup5081	2.95063	-4.87287	1.16196	-4.19366	2.74484e-05	0.000630501	Down	MTA_Mm	ERVL-MaLR	LTR	MTA_Mm:ERVL-MaLR:LTR	NA	2cWT-2cKO:8cKO-2cKO	0	0	0	0	0	0	0	0	0	0	0	0	0	0	2.44291	7.65061	13.649	17.2603	2.86979	3.38477	0.985248	2.90536	8.01584	2.27966	2.38135	15.1844	16.4275	6.15729	1.46357	0	6.1158	0	0	0	0	0
MTA_Mm_dup5195	4.62172	-3.34582	1.14894	-2.91209	0.00359017	0.0337959	Down	MTA_Mm	ERVL-MaLR	LTR	MTA_Mm:ERVL-MaLR:LTR	NA	2cWT-2cKO:8cKO-2cKO	1.16685	0.511321	0.832132	0	0	1.17156	0	0	0	0	36.8621	0	0	0	21.6197	3.49742	1.46566	5.05178	16.6633	8.01292	0.738936	2.32429	0.242904	12.7346	0.700398	3.21208	33.1287	0.286386	6.34213	12.0662	1.0193	0	1.35292	0	0	0
MTA_Mm_dup520	4.92656	-3.36483	1.14438	-2.94031	0.00327883	0.0315689	Down	MTA_Mm	ERVL-MaLR	LTR	MTA_Mm:ERVL-MaLR:LTR	NA	2cWT-2cKO:8cKO-2cKO	0	1.53396	0.832132	0	0	3.51469	0	0	0	0	0	0	0	0	22.9633	6.12049	11.1757	27.5743	35.0855	8.42738	0	9.29715	1.09307	12.4202	0.840478	0.292008	23.8198	1.14554	15.1235	0	0	0	0	1.02339	0	0
MTA_Mm_dup527	3.00172	-4.98095	1.79086	-2.78133	0.00541374	0.0455991	Down	MTA_Mm	ERVL-MaLR	LTR	MTA_Mm:ERVL-MaLR:LTR	NA	2cWT-2cKO:8cKO-2cKO	0	0	0	0	0	0	0	0	0	0	0	0	0	0	0.122145	0.327883	0.274812	25.6799	14.2564	0.138154	34.73	1.16214	0.242904	5.58123	16.3893	0	0.273791	11.885	0	0	0	0	0	0	0	0
MTA_Mm_dup5411	7.73217	-5.19485	1.21543	-4.2741	1.91913e-05	0.000457311	Down	MTA_Mm	ERVL-MaLR	LTR	MTA_Mm:ERVL-MaLR:LTR	NA	2cWT-2cKO:8cKO-2cKO	0	0	0	0	2.6429	1.17156	0	10.5108	0	0	0	0	0	0	2.56505	8.96215	37.9241	90.7216	0.277722	11.9503	16.0103	18.8848	1.33597	1.808	3.36191	9.63625	33.1287	29.9273	0.975712	0	0	0.895879	0	0	0	3.39941
MTA_Mm_dup5490	3.33114	-4.47818	1.32909	-3.36936	0.000753442	0.0105058	Down	MTA_Mm	ERVL-MaLR	LTR	MTA_Mm:ERVL-MaLR:LTR	NA	2cWT-2cKO:8cKO-2cKO	0	0	0	0	0	1.17156	0	0	8.66229	0	0	0	0	0	39.0865	0.218589	1.46566	8.84062	11.0163	1.17431	0	2.61482	18.9465	14.6999	5.32302	0.876023	3.83308	0.572771	3.17107	0	0	0	0	0	1.57899	0
MTA_Mm_dup5506	3.55571	-2.81682	0.948182	-2.97076	0.00297065	0.0293416	Down	MTA_Mm	ERVL-MaLR	LTR	MTA_Mm:ERVL-MaLR:LTR	8cWT-8cKO:8cWT-2cWT	2cWT-2cKO:8cKO-2cKO	0	0	0	5.55864	0	1.17156	0	10.5108	0	43.6697	0	0	420.145	0	4.39724	6.55767	5.67945	1.89442	3.14751	0.621692	0.738936	6.10126	2.67195	2.35827	3.08175	7.5922	14.2371	4.0094	7.56177	0	0	0	0	0	0	0
MTA_Mm_dup5519	2.34035	-4.35653	1.38702	-3.14092	0.0016842	0.0194184	Down	MTA_Mm	ERVL-MaLR	LTR	MTA_Mm:ERVL-MaLR:LTR	NA	2cWT-2cKO	0	0	0	0	0	0	0	0	0	0	0	0	0	0	0.244291	4.0439	4.03058	0	12.6826	1.03615	0	1.45268	9.23036	4.08766	0.700398	10.9503	5.47582	8.73476	9.26927	0	9.1737	0.895879	0	0	0	0
MTA_Mm_dup5578	10.4101	-4.80559	1.2957	-3.70887	0.000208185	0.00365717	Down	MTA_Mm	ERVL-MaLR	LTR	MTA_Mm:ERVL-MaLR:LTR	8cWT-2cWT	2cWT-2cKO	0	0	0.832132	0	2.6429	0	66.864	10.5108	0	0	0	0	0	0	38.3537	13.1153	18.4124	33.6786	8.1465	20.0323	34.4837	0.581072	5.10099	4.63792	6.44366	7.15419	1.09516	1.14554	7.8057	2.41324	2.0386	96.7549	1.35292	0	1.57899	0
MTA_Mm_dup5611	2.86883	-3.87059	1.10316	-3.50864	0.000450402	0.00694195	Down	MTA_Mm	ERVL-MaLR	LTR	MTA_Mm:ERVL-MaLR:LTR	NA	2cWT-2cKO:8cKO-2cKO	0	0.511321	0.832132	0	0	0	0	0	0	0	0	0	0	0	8.42804	4.0439	1.46566	0.841964	7.96136	9.46354	3.94099	3.48643	1.82178	6.60315	6.02342	4.67212	31.7598	0.859157	4.87856	2.41324	0	0	0	6.14035	0	0
MTA_Mm_dup5621	2.26849	-3.80477	1.15353	-3.29838	0.000972443	0.0127648	Down	MTA_Mm	ERVL-MaLR	LTR	MTA_Mm:ERVL-MaLR:LTR	8cWT-2cWT	2cWT-2cKO	0	0	0	0	0	0	0	10.5108	0	0	0	0	0	0	5.25225	4.80896	2.3817	3.57835	1.94405	2.21046	2.21681	8.42554	0.607261	1.25774	0.840478	7.30019	5.20203	1.14554	2.19535	16.8927	0	0	0	7.16374	0	0
MTA_Mm_dup5686	7.40811	-4.03954	1.24825	-3.23616	0.0012115	0.0152274	Down	MTA_Mm	ERVL-MaLR	LTR	MTA_Mm:ERVL-MaLR:LTR	NA	2cWT-2cKO	1.16685	1.53396	0.832132	0	0	0	11.144	0	0	0	0	0	0	0	10.0159	4.80896	9.71002	41.6772	8.23908	18.3745	13.3008	56.364	3.15776	5.10958	0.840478	11.2423	3.0117	7.01645	0.731784	0	1.0193	0	1.35292	63.4503	0	0
MTA_Mm_dup5693	7.25809	-3.0312	0.948605	-3.19543	0.00139624	0.0169064	Down	MTA_Mm	ERVL-MaLR	LTR	MTA_Mm:ERVL-MaLR:LTR	NA	2cWT-2cKO:8cKO-2cKO	4.66739	2.04528	0.832132	2.77932	0	1.17156	11.144	0	0	0	0	0	0	0	9.4052	1.9673	15.5727	1.26295	0.370296	3.45385	59.3612	71.1813	13.1168	19.888	9.94565	16.6444	3.0117	0.715964	13.9039	0	0	0.895879	0	1.02339	0.789493	3.39941
MTA_Mm_dup5709	8.71301	-3.78321	1.25284	-3.0197	0.00253029	0.026235	Down	MTA_Mm	ERVL-MaLR	LTR	MTA_Mm:ERVL-MaLR:LTR	NA	2cWT-2cKO	2.33369	0	0	2.77932	0	2.34313	11.144	0	8.66229	0	0	0	0	0	13.8024	13.006	13.2826	42.7297	16.7559	15.8877	45.5677	1.74322	0.121452	15.4073	0	19.4185	2.19033	35.7982	3.17107	2.41324	2.0386	0	1.35292	0	0	0
MTA_Mm_dup5733	3.60245	-3.57547	1.182	-3.02493	0.00248693	0.025942	Down	MTA_Mm	ERVL-MaLR	LTR	MTA_Mm:ERVL-MaLR:LTR	NA	2cWT-2cKO:8cKO-2cKO	2.33369	1.02264	0	0	0	0	0	0	0	0	0	0	0	0	2.56505	2.84166	10.8093	6.52522	0.370296	2.07231	56.1591	9.00662	0.242904	1.7294	4.62263	14.3084	9.03511	8.0188	0.731784	0	0	0.895879	0	0	0	0
MTA_Mm_dup5734	5.00893	-4.36426	1.24088	-3.51706	0.000436354	0.00676046	Down	MTA_Mm	ERVL-MaLR	LTR	MTA_Mm:ERVL-MaLR:LTR	8cWT-2cWT	2cWT-2cKO:8cKO-2cKO	0	0	1.66426	0	0	0	0	10.5108	0	0	0	0	0	23.0898	21.3755	0.437178	12.0917	24.417	1.20346	0.759846	0.492624	13.0741	9.10891	4.48071	2.66151	39.129	8.21373	6.73006	0	2.41324	0	2.68764	0	0	0.789493	0
MTA_Mm_dup5735	9.58481	-2.52332	0.825911	-3.0552	0.00224911	0.0240372	Down	MTA_Mm	ERVL-MaLR	LTR	MTA_Mm:ERVL-MaLR:LTR	NA	2cWT-2cKO:8cKO-2cKO	1.16685	4.09057	3.32853	0	10.5716	2.34313	0	0	0	0	0	12.1437	0	11.5449	35.6665	9.07144	7.69474	52.6227	11.1089	21.0685	0.246312	15.6889	1.33597	12.263	5.32302	47.7433	40.5211	36.5142	2.43928	4.82649	1.0193	0.895879	0	0	0	3.39941
MTA_Mm_dup5838	5.33358	-2.79641	1.01138	-2.76494	0.00569331	0.0471858	Down	MTA_Mm	ERVL-MaLR	LTR	MTA_Mm:ERVL-MaLR:LTR	NA	2cWT-2cKO:8cKO-2cKO	2.33369	1.53396	0.832132	2.77932	0	1.17156	22.288	0	8.66229	0	0	0	0	0	2.07647	0.655767	9.89323	26.7324	13.3306	1.03615	60.8391	4.93911	0.850165	5.65984	0.840478	7.7382	10.9516	0.286386	4.14678	4.82649	1.0193	0.895879	0	1.02339	0	0
MTA_Mm_dup6084	4.71407	-5.13355	1.5396	-3.33434	0.000855017	0.0114826	Down	MTA_Mm	ERVL-MaLR	LTR	MTA_Mm:ERVL-MaLR:LTR	NA	2cWT-2cKO	0	0	0	0	0	0	0	0	0	0	36.8621	0	0	0	1.46575	3.49742	8.79398	0	7.22077	33.9858	5.66517	1.16214	0.121452	6.44593	0.700398	29.0548	18.344	6.58687	0.243928	0	14.2702	0	0	0	0	0
MTA_Mm_dup6088	1.7101	-4.16817	1.14873	-3.62851	0.000285066	0.00475945	Down	MTA_Mm	ERVL-MaLR	LTR	MTA_Mm:ERVL-MaLR:LTR	NA	2cWT-2cKO:8cKO-2cKO	0	0	0	0	0	0	0	0	0	0	0	0	0	0	2.93149	11.0387	0	2.94687	4.16583	4.07554	3.69468	9.58769	1.21452	5.73845	4.48255	1.60604	1.09516	3.86621	6.82999	0	0	0	0	0	0	0
MTA_Mm_dup6260	3.4351	-3.65519	1.0696	-3.41733	0.000632379	0.00918365	Down	MTA_Mm	ERVL-MaLR	LTR	MTA_Mm:ERVL-MaLR:LTR	8cWT-8cKO:8cWT-2cWT	2cWT-2cKO:8cKO-2cKO	0	1.53396	0	0	0	0	11.144	0	0	0	0	0	16.1594	0	6.59585	10.1644	9.0688	2.73638	6.7579	0.276308	15.2713	0.581072	2.7934	1.65079	11.4865	6.27816	7.66615	14.6057	0.975712	0	0	0	1.35292	0	0	0
MTA_Mm_dup6478	2.88173	-4.38981	1.51014	-2.90689	0.00365041	0.0342188	Down	MTA_Mm	ERVL-MaLR	LTR	MTA_Mm:ERVL-MaLR:LTR	NA	2cWT-2cKO:8cKO-2cKO	0	0	0.832132	0	0	0	0	0	0	0	0	0	0	0	5.86298	0.327883	0.91604	0	4.35097	17.062	2.21681	8.42554	0	8.64698	22.833	14.4544	0.547582	19.9038	0.243928	0	0	0	0	0	0	0
MTA_Mm_dup6487	13.6816	-4.83531	0.950428	-5.08751	3.62792e-07	1.24044e-05	Down	MTA_Mm	ERVL-MaLR	LTR	MTA_Mm:ERVL-MaLR:LTR	8cWT-2cWT	2cWT-2cKO:8cKO-2cKO	1.16685	0	0	2.77932	0	2.34313	0	0	0	0	110.586	0	0	0	17.5889	3.27883	7.60313	18.5232	28.9756	9.04908	27.8333	55.4924	7.65149	51.0958	31.7981	8.61423	22.1771	24.6292	60.982	0	2.0386	0	0	1.02339	0.789493	10.1982
MTA_Mm_dup6518	5.31642	-4.64748	1.29074	-3.60063	0.000317442	0.00521267	Down	MTA_Mm	ERVL-MaLR	LTR	MTA_Mm:ERVL-MaLR:LTR	NA	2cWT-2cKO	0	1.02264	0	0	0	0	0	21.0216	0	0	0	0	0	0	4.51938	2.0766	13.191	37.6779	2.4995	2.27954	31.5279	1.45268	9.71617	1.49357	0.980557	14.6004	6.84478	2.43428	21.9535	0	1.0193	0	0	0	0	20.3964
MTA_Mm_dup6529	9.38113	-4.66036	1.39046	-3.35167	0.000803251	0.0109689	Down	MTA_Mm	ERVL-MaLR	LTR	MTA_Mm:ERVL-MaLR:LTR	NA	2cWT-2cKO	0	0.511321	0	5.55864	0	0	11.144	10.5108	0	0	0	0	0	0	23.0855	11.0387	24.5499	56.2011	10.7386	0.621692	32.7595	0.581072	9.35182	4.24488	0.280159	51.2473	6.84478	0	10.7328	0	1.0193	69.8786	5.41169	0	0.789493	0
MTA_Mm_dup6613	4.33225	-4.33573	1.4158	-3.06238	0.00219583	0.02381	Down	MTA_Mm	ERVL-MaLR	LTR	MTA_Mm:ERVL-MaLR:LTR	8cWT-2cWT	2cWT-2cKO	0	0	0	0	0	0	0	0	0	0	73.7243	0	0	0	4.15295	0.437178	2.47331	6.10424	12.4049	26.94	0.246312	5.81072	1.33597	8.64698	0.700398	0.438011	0.547582	0	0.487856	2.41324	0	0	1.35292	1.02339	11.0529	0
MTA_Mm_dup6684	2.95239	-3.52185	1.19278	-2.95263	0.00315079	0.0306459	Down	MTA_Mm	ERVL-MaLR	LTR	MTA_Mm:ERVL-MaLR:LTR	NA	2cWT-2cKO:8cKO-2cKO	0	1.02264	0	0	0	1.17156	11.144	0	0	0	0	0	0	0	3.17578	6.22979	0.274812	7.36718	0.925739	1.93415	1.23156	31.959	0.971617	2.43687	1.4008	17.9585	16.975	1.43193	0.731784	0	0	0.895879	0	0	0	0
MTA_Mm_dup6810	19.8465	-5.16182	1.27471	-4.04942	5.13443e-05	0.00110542	Down	MTA_Mm	ERVL-MaLR	LTR	MTA_Mm:ERVL-MaLR:LTR	NA	2cWT-2cKO:8cWT-8cKO	0	0	0	0	0	3.51469	0	0	0	0	0	0	0	0	26.3834	6.66696	24.0918	63.5683	26.5687	16.8548	3.69468	14.2363	23.0759	41.0338	19.8913	43.5091	9.03511	39.6644	13.9039	0	103.969	9.85467	0	1.02339	0.789493	0
MTA_Mm_dup6898	7.87044	-5.87512	1.57816	-3.72277	0.00019705	0.00350993	Down	MTA_Mm	ERVL-MaLR	LTR	MTA_Mm:ERVL-MaLR:LTR	8cWT-2cWT	2cWT-2cKO	0	0	0	0	0	0	0	21.0216	0	0	0	0	0	0	1.71004	9.07144	13.9238	0.210491	3.33266	27.4926	0.246312	2.03375	4.73663	16.9795	0	7.5922	58.8651	28.209	31.9546	60.3311	0	0	2.70584	0	0.789493	0
MTA_Mm_dup6919	7.89268	-4.31066	1.28863	-3.34514	0.000822415	0.0111454	Down	MTA_Mm	ERVL-MaLR	LTR	MTA_Mm:ERVL-MaLR:LTR	8cWT-8cKO:8cWT-2cWT	2cWT-2cKO:8cKO-2cKO	2.33369	0	0	0	0	1.17156	0	0	779.606	0	0	0	0	80.8144	1.46575	1.53012	0.91604	36.2044	29.0682	10.2234	26.848	1.45268	16.2746	17.687	8.68494	50.3713	0.273791	4.86855	0.487856	0	0	0	1.35292	0	0	0
MTA_Mm_dup6964	3.70145	-5.04745	1.77099	-2.85008	0.00437086	0.0391229	Down	MTA_Mm	ERVL-MaLR	LTR	MTA_Mm:ERVL-MaLR:LTR	NA	2cWT-2cKO:8cKO-2cKO	0	0	0	0	0	0	0	0	8.66229	0	0	12.1437	0	0	2.32076	30.1653	9.52682	0	0	2.14138	2.46312	0	3.27921	0.0786089	12.7472	16.9364	0.547582	35.9414	0	0	0	0	0	0	0	0
MTA_Mm_dup6965	6.5333	-3.58661	0.93697	-3.82788	0.000129252	0.00244115	Down	MTA_Mm	ERVL-MaLR	LTR	MTA_Mm:ERVL-MaLR:LTR	8cWT-8cKO	2cWT-2cKO:8cKO-2cKO	1.16685	2.55661	0	0	2.6429	0	0	0	8.66229	0	0	12.1437	0	11.5449	21.6197	1.9673	11.7253	31.3632	2.86979	6.97677	1.9705	19.4659	34.1281	8.48976	8.54486	33.7269	0.273791	7.58922	8.53748	2.41324	0	0	1.35292	0	0	0
MTA_Mm_dup704	3.4565	-4.55376	1.5764	-2.88871	0.00386822	0.0356244	Down	MTA_Mm	ERVL-MaLR	LTR	MTA_Mm:ERVL-MaLR:LTR	NA	2cWT-2cKO	0	0.511321	0	0	0	0	0	0	0	0	0	0	0	0	6.84015	2.73236	0.641228	35.152	2.77722	0.276308	0.985248	6.10126	0	2.04383	0.560318	0	54.4844	0.143193	0.243928	0	1.0193	1.79176	0	8.18714	0	3.39941
MTA_Mm_dup7121	3.27832	-5.04811	1.16416	-4.33626	1.44926e-05	0.00035826	Down	MTA_Mm	ERVL-MaLR	LTR	MTA_Mm:ERVL-MaLR:LTR	NA	2cWT-2cKO:8cKO-2cKO	0	0	0	0	0	0	0	0	0	0	0	0	0	0	7.57302	5.02755	5.67945	11.156	13.5158	3.93738	1.23156	23.5334	1.09307	11.1625	16.1092	0.876023	12.3206	0.572771	2.68321	4.82649	0	0	0	0	0	0
MTA_Mm_dup7289	3.91171	-4.56063	1.63738	-2.78533	0.00534737	0.0451962	Down	MTA_Mm	ERVL-MaLR	LTR	MTA_Mm:ERVL-MaLR:LTR	NA	2cWT-2cKO	0	0	0	0	0	0	0	0	0	0	0	0	0	0	3.78651	0.109294	13.191	11.7875	0.370296	4.62815	0	22.3713	0.121452	2.82992	0.420239	6.13216	8.76131	2.72066	5.85427	4.82649	0	0	56.8227	0	0	0
MTA_Mm_dup7318	6.61279	-4.75302	1.46768	-3.23847	0.00120174	0.0151367	Down	MTA_Mm	ERVL-MaLR	LTR	MTA_Mm:ERVL-MaLR:LTR	NA	2cWT-2cKO	0	0	0	2.77932	0	1.17156	0	0	0	0	0	0	0	0	22.2305	27.4329	21.2521	51.9913	6.3876	6.35508	0.492624	17.1416	0	16.9795	0.14008	22.4846	8.21373	0.859157	0.487856	0	30.579	0.895879	0	0	0	6.79881
MTA_Mm_dup7370	5.23283	-4.74643	1.14975	-4.12824	3.65558e-05	0.000812513	Down	MTA_Mm	ERVL-MaLR	LTR	MTA_Mm:ERVL-MaLR:LTR	NA	2cWT-2cKO:8cKO-2cKO	0	0.511321	0	2.77932	0	0	0	10.5108	0	0	0	0	0	0	11.6038	0.874356	3.38935	38.3094	10.1831	8.15108	51.4792	6.68233	5.34389	9.59028	4.34247	23.2146	1.64275	1.86151	0.731784	2.41324	0	0	0	0	0	0
MTA_Mm_dup7441	14.9733	-3.28318	0.743642	-4.415	1.01009e-05	0.000259771	Down	MTA_Mm	ERVL-MaLR	LTR	MTA_Mm:ERVL-MaLR:LTR	NA	2cWT-2cKO	2.33369	4.09057	3.32853	2.77932	0	1.17156	11.144	0	0	43.6697	0	0	0	0	14.291	24.3727	21.7101	51.7808	9.90541	13.47	10.3451	21.4997	6.31551	43.8637	25.0742	38.691	47.0921	15.0352	20.7339	9.65297	1.0193	11.6464	4.05877	0	2.36848	23.7958
MTA_Mm_dup7442	19.4452	-4.38685	0.610874	-7.18127	6.90655e-13	7.12533e-11	Down	MTA_Mm	ERVL-MaLR	LTR	MTA_Mm:ERVL-MaLR:LTR	8cWT-8cKO	2cWT-2cKO:8cKO-2cKO	1.16685	1.02264	0.832132	0	5.2858	5.85782	0	0	0	0	0	12.1437	0	11.5449	53.0111	49.729	38.4737	73.8823	23.2361	39.512	112.565	72.9245	43.237	21.3816	11.7667	39.129	32.3073	35.7982	30.2471	0	1.0193	0	0	0	0	3.39941
MTA_Mm_dup7637	9.1544	-4.16635	1.16078	-3.58925	0.00033163	0.00540289	Down	MTA_Mm	ERVL-MaLR	LTR	MTA_Mm:ERVL-MaLR:LTR	8cWT-2cWT	2cWT-2cKO	0	2.04528	0	0	0	0	0	105.108	0	0	0	12.1437	0	0	12.0924	1.09294	14.565	34.9415	5.46186	0.483538	13.3008	7.55394	0.364356	8.64698	5.60318	4.67212	13.6896	20.047	17.8068	0	2.0386	7.16703	9.47045	3.07018	33.9482	299.148
MTA_Mm_dup7668	11.5366	-2.92318	0.955717	-3.05862	0.00222357	0.0239362	Down	MTA_Mm	ERVL-MaLR	LTR	MTA_Mm:ERVL-MaLR:LTR	NA	2cWT-2cKO:8cKO-2cKO	0	17.8962	0	0	0	0	0	0	0	0	0	0	0	11.5449	42.2623	10.4923	12.2749	57.043	10.5534	41.5843	3.69468	29.0536	13.6026	33.4088	1.26072	28.9088	15.0585	45.2489	46.3463	4.82649	0	1.79176	0	0	0	0
MTA_Mm_dup7683	1.63061	-4.03626	1.35429	-2.98036	0.00287911	0.028804	Down	MTA_Mm	ERVL-MaLR	LTR	MTA_Mm:ERVL-MaLR:LTR	NA	2cWT-2cKO:8cKO-2cKO	0	0	0	0	0	0	0	0	0	0	0	0	0	0	0.122145	1.42083	5.86266	4.42031	0.648017	0.345385	4.67993	0	3.0363	4.4021	0.14008	1.16803	13.4158	3.86621	14.3918	2.41324	0	0	0	0	0	0
MTA_Mm_dup7827	7.09635	-4.6272	1.64819	-2.80745	0.00499359	0.043181	Down	MTA_Mm	ERVL-MaLR	LTR	MTA_Mm:ERVL-MaLR:LTR	NA	2cWT-2cKO	0	0.511321	0	0	0	0	0	0	0	0	0	0	16.1594	0	7.69516	0.546472	11.8169	0.210491	5.73958	9.18723	0	44.7425	3.76502	1.49357	0.420239	9.78226	4.92824	18.0423	0.243928	125.489	0	1.79176	0	0	0	0
MTA_Mm_dup7850	3.47227	-4.02365	1.20528	-3.33835	0.000842778	0.0113609	Down	MTA_Mm	ERVL-MaLR	LTR	MTA_Mm:ERVL-MaLR:LTR	NA	2cWT-2cKO:8cKO-2cKO	0	0.511321	0	0	2.6429	0	0	0	0	0	0	0	0	11.5449	25.7727	4.15319	5.31303	14.5239	7.96136	0.207231	11.3303	0.581072	7.16568	0	7.70438	4.96413	1.09516	6.30048	10.245	0	3.0579	0	0	0	0	3.39941
MTA_Mm_dup788	4.9833	-3.87271	1.11849	-3.46244	0.000535295	0.00801505	Down	MTA_Mm	ERVL-MaLR	LTR	MTA_Mm:ERVL-MaLR:LTR	8cWT-2cWT	2cWT-2cKO:8cKO-2cKO	0	0.511321	0.832132	0	0	1.17156	11.144	0	0	0	0	0	32.3188	0	5.3744	0.874356	14.8398	15.7868	17.3113	1.86508	0.246312	10.7498	3.52211	5.3454	0.560318	18.1045	15.3323	0.286386	18.5385	0	0	0	4.05877	1.02339	0	0
MTA_Mm_dup7893	3.22311	-5.08514	1.78088	-2.85541	0.00429819	0.0386664	Down	MTA_Mm	ERVL-MaLR	LTR	MTA_Mm:ERVL-MaLR:LTR	NA	2cWT-2cKO:8cKO-2cKO	0	0	0	0	0	0	0	0	0	0	0	0	0	0	27.1163	0	11.3589	22.9435	14.8118	0.345385	7.88198	0.290536	0.364356	12.656	0	8.46822	0.273791	12.7442	0	0	0	0	0	0	0	0
MTA_Mm_dup7894	6.88227	-4.82969	1.68532	-2.86574	0.00416031	0.037692	Down	MTA_Mm	ERVL-MaLR	LTR	MTA_Mm:ERVL-MaLR:LTR	NA	2cWT-2cKO	0	0	0	0	0	0	0	0	0	0	0	0	16.1594	0	2.19862	1.63942	18.1376	7.78817	0.46287	4.90446	0	0.290536	3.0363	7.23202	5.4631	30.8068	9.03511	0.143193	8.78141	0	0	0	0	1.02339	0	0
MTA_Mm_dup798	2.69052	-3.64267	1.23932	-2.93923	0.00329024	0.0316232	Down	MTA_Mm	ERVL-MaLR	LTR	MTA_Mm:ERVL-MaLR:LTR	8cWT-8cKO:8cWT-2cWT	2cWT-2cKO:8cKO-2cKO	0	0	0	0	0	1.17156	22.288	0	0	0	0	12.1437	0	0	4.0308	1.20224	3.66416	12.2085	4.99899	2.97031	11.084	0.290536	0	5.03097	4.62263	0.584015	0	8.73476	3.17107	0	0	0	1.35292	0	0	0
MTA_Mm_dup8004	12.069	-2.61349	0.579539	-4.50959	6.49518e-06	0.00017538	Down	MTA_Mm	ERVL-MaLR	LTR	MTA_Mm:ERVL-MaLR:LTR	NA	2cWT-2cKO:8cKO-2cKO	1.16685	12.2717	0.832132	2.77932	0	2.34313	0	10.5108	0	0	0	12.1437	32.3188	0	32.8571	29.0723	29.4965	14.7344	32.0306	14.9206	17.9808	46.1952	4.37228	12.8919	36.0005	25.9887	27.6529	21.6221	8.53748	2.41324	2.0386	3.58352	0	1.02339	0.789493	3.39941
MTA_Mm_dup8051	6.4597	-3.32179	0.982036	-3.38255	0.000718156	0.0101165	Down	MTA_Mm	ERVL-MaLR	LTR	MTA_Mm:ERVL-MaLR:LTR	NA	2cWT-2cKO:8cKO-2cKO	3.50054	0	0	5.55864	0	0	0	0	8.66229	0	36.8621	0	0	0	9.52735	10.9294	2.3817	34.731	10.1831	1.10523	1.23156	2.90536	23.6832	7.46784	20.5917	30.0768	9.03511	0.715964	14.6357	2.41324	1.0193	1.79176	0	0	0	0
MTA_Mm_dup840	3.70399	-4.58433	0.995445	-4.60531	4.11849e-06	0.000115214	Down	MTA_Mm	ERVL-MaLR	LTR	MTA_Mm:ERVL-MaLR:LTR	8cWT-2cWT	2cWT-2cKO:8cKO-2cKO	0	0	0	0	0	1.17156	0	0	0	0	0	12.1437	0	0	2.6872	12.4596	3.02293	9.68258	3.70296	4.62815	12.8082	14.5268	11.4165	7.9395	0.980557	7.4462	12.5944	4.86855	10.4889	0	0	4.4794	0	0	0	0
MTA_Mm_dup8644	12.9231	-5.24621	1.0339	-5.0742	3.89131e-07	1.31538e-05	Down	MTA_Mm	ERVL-MaLR	LTR	MTA_Mm:ERVL-MaLR:LTR	NA	2cWT-2cKO:8cKO-2cKO	2.33369	0.511321	0	0	0	0	0	0	0	87.3395	0	0	0	0	20.0319	13.8804	37.2828	45.0451	14.8118	10.0852	39.9025	20.047	4.97954	21.696	22.1326	29.4928	20.2605	12.1714	33.4181	0	0	6.27115	0	31.7252	4.73696	0
MTA_Mm_dup8645	6.86171	-5.64419	1.04996	-5.37564	7.63117e-08	3.00665e-06	Down	MTA_Mm	ERVL-MaLR	LTR	MTA_Mm:ERVL-MaLR:LTR	8cWT-2cWT	2cWT-2cKO:8cKO-2cKO	1.16685	0	0	0	0	0	0	0	0	0	0	0	0	0	2.44291	17.4871	7.23672	14.1029	17.7742	18.3054	12.8082	38.9318	3.15776	33.2516	3.64207	20.7325	30.6646	2.72066	25.3685	0	1.0193	0	0	3.07018	0	0
MTA_Mm_dup8658	14.4922	-2.92621	0.809763	-3.61367	0.000301896	0.00500765	Down	MTA_Mm	ERVL-MaLR	LTR	MTA_Mm:ERVL-MaLR:LTR	NA	2cWT-2cKO	5.83423	1.53396	0	13.8966	0	1.17156	11.144	0	8.66229	0	36.8621	0	0	0	37.7429	10.7109	18.504	57.043	47.0275	22.1046	29.8037	47.0668	2.30759	15.4859	16.6695	32.9969	24.3674	10.1667	7.8057	21.7192	40.772	11.6464	1.35292	1.02339	0.789493	0
MTA_Mm_dup8659	8.46619	-3.27513	1.1356	-2.88405	0.003926	0.0360634	Down	MTA_Mm	ERVL-MaLR	LTR	MTA_Mm:ERVL-MaLR:LTR	NA	2cWT-2cKO	0	1.53396	6.65706	0	0	0	0	0	0	0	0	0	0	0	8.30589	14.2083	27.0232	18.7337	8.5168	23.7625	10.0988	12.493	10.6878	16.9795	0.700398	15.9144	46.2707	2.43428	12.1964	7.23973	0	65.3992	0	4.09357	0	0
MTA_Mm_dup8692	19.4077	-3.90422	1.05219	-3.71058	0.000206786	0.00364335	Down	MTA_Mm	ERVL-MaLR	LTR	MTA_Mm:ERVL-MaLR:LTR	NA	2cWT-2cKO	3.50054	3.57925	1.66426	0	0	2.34313	0	0	17.3246	43.6697	0	24.2874	0	11.5449	34.0786	14.4269	12.3665	34.731	22.1252	26.7328	35.7152	33.9927	28.7842	18.08	23.8135	90.0844	9.03511	73.7443	2.19535	9.65297	0	0	0	3.07018	0	0
MTA_Mm_dup8794	7.30881	-4.22342	1.04773	-4.03102	5.55348e-05	0.00118705	Down	MTA_Mm	ERVL-MaLR	LTR	MTA_Mm:ERVL-MaLR:LTR	NA	2cWT-2cKO:8cKO-2cKO	2.33369	0.511321	0.832132	0	0	1.17156	0	0	0	0	0	0	0	0	10.7488	11.8038	8.97719	9.05111	23.5138	8.77277	1.23156	11.3309	3.88647	2.43687	1.26072	5.98616	88.1607	14.1761	62.2017	0	2.0386	0	0	0	0	0
MTA_Mm_dup8842	8.96887	-2.69339	0.901909	-2.98632	0.00282358	0.0284237	Down	MTA_Mm	ERVL-MaLR	LTR	MTA_Mm:ERVL-MaLR:LTR	NA	2cWT-2cKO:8cKO-2cKO	1.16685	6.64717	1.66426	2.77932	0	0	0	0	0	43.6697	36.8621	0	0	0	12.7031	17.9243	9.43521	2.3154	6.94304	22.5191	4.67993	54.9113	0.971617	26.9628	15.829	25.1127	6.84478	7.15964	4.63463	14.4795	0	0.895879	0	0	4.73696	0
MTA_Mm_dup9018	41.4785	-4.67342	1.07848	-4.33335	1.46856e-05	0.000362028	Down	MTA_Mm	ERVL-MaLR	LTR	MTA_Mm:ERVL-MaLR:LTR	8cWT-2cWT	2cWT-2cKO	5.83423	2.55661	0.832132	0	0	0	11.144	0	8.66229	0	73.7243	449.317	16.1594	0	78.0509	32.0233	57.8021	37.8884	64.3389	42.4132	4.67993	62.1747	20.7683	22.4035	19.1909	105.269	68.4478	34.6527	1.21964	0	6.1158	150.508	33.823	0	89.2128	3.39941
MTA_Mm_dup9026	5.84366	-4.11418	0.964224	-4.26683	1.98272e-05	0.000469954	Down	MTA_Mm	ERVL-MaLR	LTR	MTA_Mm:ERVL-MaLR:LTR	8cWT-2cWT	2cWT-2cKO:8cKO-2cKO	0	0.511321	0	0	2.6429	1.17156	11.144	0	0	0	36.8621	0	0	0	16.9782	18.0336	4.6718	5.05178	7.49849	13.7463	1.9705	1.16214	4.12937	1.88661	12.6072	23.0686	3.83308	19.6174	22.4414	0	0	0	0	1.02339	1.57899	0
MTA_Mm_dup9039	7.6789	-4.5438	1.4647	-3.10221	0.00192084	0.0214807	Down	MTA_Mm	ERVL-MaLR	LTR	MTA_Mm:ERVL-MaLR:LTR	8cWT-8cKO:8cWT-2cWT	2cWT-2cKO:8cKO-2cKO	0	1.02264	0	0	0	0	0	31.5324	0	0	110.586	0	0	0	12.0924	0.109294	17.3132	5.47276	0.185148	0.276308	0.246312	14.2363	0.485809	7.15341	30.8175	32.1208	5.20203	0.143193	15.1235	0	0	0	0	0	0	0
MTA_Mm_dup9057	4.70821	-5.53105	1.28197	-4.31449	1.59969e-05	0.000389514	Down	MTA_Mm	ERVL-MaLR	LTR	MTA_Mm:ERVL-MaLR:LTR	8cWT-2cWT	2cWT-2cKO:8cKO-2cKO	0	0	0	0	0	0	0	0	0	0	0	0	0	11.5449	9.52735	0.765061	4.03058	7.78817	1.01831	7.59846	31.7742	3.1959	0.850165	6.05288	14.4282	0.584015	19.4392	53.4109	2.19535	0	0	0	0	0	0	0
MTA_Mm_dup9064	2.19995	-2.40959	0.827167	-2.91306	0.00357907	0.033745	Down	MTA_Mm	ERVL-MaLR	LTR	MTA_Mm:ERVL-MaLR:LTR	8cWT-8cKO	2cWT-2cKO:8cKO-2cKO	0	0	0.832132	0	0	3.51469	0	0	0	0	0	0	0	11.5449	2.07647	3.71601	5.77105	4.42031	4.16583	2.62492	0.985248	12.493	3.64356	3.30157	1.82103	8.17621	2.46412	4.15259	3.90285	0	0	1.79176	0	0	0	0
MTA_Mm_dup9086	2.67485	-3.97341	1.36075	-2.92003	0.00350003	0.0331574	Down	MTA_Mm	ERVL-MaLR	LTR	MTA_Mm:ERVL-MaLR:LTR	8cWT-2cWT	2cWT-2cKO:8cKO-2cKO	0	0	0	0	0	0	0	0	0	43.6697	0	0	0	0	2.19862	0.218589	5.77105	5.68326	6.20245	0.690769	0.985248	1.74322	0.121452	0.471653	0.14008	16.0604	4.38066	0.143193	10.4889	0	0	0	0	0	0	0
MTA_Mm_dup9131	6.79326	-4.37447	1.33304	-3.28158	0.00103226	0.0133991	Down	MTA_Mm	ERVL-MaLR	LTR	MTA_Mm:ERVL-MaLR:LTR	NA	2cWT-2cKO	1.16685	0.511321	0	0	0	0	0	21.0216	0	0	0	0	0	0	19.1768	2.18589	1.83208	7.99866	13.7009	7.32215	0	33.1211	5.22244	6.2101	1.68096	4.08811	2.73791	22.0517	9.5132	4.82649	83.5826	0	1.35292	2.04678	0	0
MTA_Mm_dup9270	2.64112	-4.24965	1.32814	-3.1997	0.0013757	0.016703	Down	MTA_Mm	ERVL-MaLR	LTR	MTA_Mm:ERVL-MaLR:LTR	NA	2cWT-2cKO:8cKO-2cKO	0	0	0	0	0	1.17156	0	0	0	0	0	0	0	0	27.727	3.16954	5.12982	0.210491	0.185148	0.552615	4.1873	18.3038	19.4323	2.59409	0.420239	1.46004	6.0234	6.0141	0.243928	0	0	0.895879	0	0	0	0
MTA_Mm_dup930	18.0743	-6.30895	1.05755	-5.96561	2.43727e-09	1.29081e-07	Down	MTA_Mm	ERVL-MaLR	LTR	MTA_Mm:ERVL-MaLR:LTR	8cWT-2cWT	2cWT-2cKO:8cKO-2cKO	0	0	0	0	2.6429	1.17156	0	0	0	43.6697	0	12.1437	0	11.5449	37.1322	60.6584	12.3665	42.0982	7.68363	35.022	44.0898	69.4381	7.89439	25.2334	9.66549	27.5947	30.6646	25.0587	129.526	0	21.4053	0	5.41169	2.04678	0	0
MTA_Mm_dup931	13.9185	-4.95311	1.06038	-4.67105	2.99662e-06	8.64034e-05	Down	MTA_Mm	ERVL-MaLR	LTR	MTA_Mm:ERVL-MaLR:LTR	NA	2cWT-2cKO	0	2.55661	0	0	0	1.17156	0	0	0	0	0	12.1437	0	0	20.154	23.0611	15.1147	13.4714	23.2361	27.7689	15.2713	36.0265	39.7149	21.0672	26.0548	49.3493	42.9852	45.3921	3.17107	0	6.1158	0.895879	0	21.4912	0	0
MTA_Mm_dup939	4.96523	-5.70681	1.57978	-3.61241	0.00030336	0.00502726	Down	MTA_Mm	ERVL-MaLR	LTR	MTA_Mm:ERVL-MaLR:LTR	NA	2cWT-2cKO:8cKO-2cKO	0	0	0	0	0	0	0	0	0	0	0	0	0	0	9.28305	10.2737	2.10689	14.5239	15.4598	1.24338	0	6.39179	0.121452	19.102	22.6929	0	70.9119	2.57747	9.02534	0	0	0	0	0	0	0
MTA_Mm_dup952	3.62714	-5.21745	1.85214	-2.81698	0.0048477	0.0422676	Down	MTA_Mm	ERVL-MaLR	LTR	MTA_Mm:ERVL-MaLR:LTR	NA	2cWT-2cKO:8cKO-2cKO	0	0	0	0	0	0	0	0	0	0	0	0	0	0	8.67233	0.874356	1.55727	0	12.7752	2.21046	10.3451	27.0199	9.10891	0.157218	0	56.7955	0	1.28874	0	0	0	0	0	0	0	3.39941
MTA_Mm_dup9582	3.98358	-3.52168	0.95975	-3.66938	0.000243142	0.00418477	Down	MTA_Mm	ERVL-MaLR	LTR	MTA_Mm:ERVL-MaLR:LTR	8cWT-8cKO:8cWT-2cWT	2cWT-2cKO:8cKO-2cKO	0	1.02264	0	0	2.6429	0	0	10.5108	0	0	36.8621	0	0	0	5.25225	5.35543	4.6718	14.1029	7.96136	3.66108	0.985248	6.39179	1.94323	6.52454	1.96111	8.46822	1.91654	22.7677	4.39071	0	0	0	0	0	0	0
MTA_Mm_dup9669	2.40403	-4.4968	0.896144	-5.01795	5.22264e-07	1.7326e-05	Down	MTA_Mm	ERVL-MaLR	LTR	MTA_Mm:ERVL-MaLR:LTR	8cWT-8cKO:8cWT-2cWT	2cWT-2cKO:8cKO-2cKO	0	0	0	0	0	0	0	0	8.66229	0	0	0	0	0	4.64153	3.49742	3.66416	8.84062	2.68464	3.10846	4.1873	7.55394	4.61518	7.46784	3.92223	4.67212	4.92824	6.0141	10.4889	0	0	0	0	0	0	0
MTA_Mm_dup9825	4.90888	-5.68385	1.37746	-4.12631	3.6863e-05	0.000818322	Down	MTA_Mm	ERVL-MaLR	LTR	MTA_Mm:ERVL-MaLR:LTR	NA	2cWT-2cKO:8cKO-2cKO	0	0	0	0	0	0	0	0	0	0	0	0	0	0	11.6038	11.5852	0.91604	7.78817	18.2371	6.42415	7.63567	1.74322	0.121452	8.17532	3.50199	42.6331	0	5.72771	54.6399	0	0	0.895879	0	0	0	0
MTA_Mm_dup9880	5.68445	-2.83297	0.924096	-3.06567	0.00217182	0.0236214	Down	MTA_Mm	ERVL-MaLR	LTR	MTA_Mm:ERVL-MaLR:LTR	NA	2cWT-2cKO:8cKO-2cKO	1.16685	1.53396	3.32853	0	2.6429	0	0	0	0	0	36.8621	0	0	0	11.2374	11.5852	30.2293	1.47344	7.12819	12.4338	1.47787	22.0807	1.33597	21.0672	5.4631	27.3027	0.547582	1.28874	6.82999	2.41324	0	0.895879	0	0	0	0
MTA_Mm_dup9902	16.4799	-6.09734	0.98731	-6.17571	6.58682e-10	3.85448e-08	Down	MTA_Mm	ERVL-MaLR	LTR	MTA_Mm:ERVL-MaLR:LTR	8cWT-2cWT	2cWT-2cKO:8cKO-2cKO	0	1.02264	0	2.77932	0	0	0	10.5108	8.66229	0	0	0	0	0	58.752	14.864	45.5272	17.4707	37.585	24.8677	0.246312	38.9318	19.068	21.4602	49.4481	90.9604	81.0422	34.7958	38.0528	9.65297	1.0193	0.895879	1.35292	0	0.789493	0
MTA_Mm-int_dup1	40.3725	-1.96136	0.645141	-3.04021	0.00236414	0.024938	Down	MTA_Mm-int	ERVL-MaLR	LTR	MTA_Mm-int:ERVL-MaLR:LTR	NA	2cWT-2cKO	7.00108	18.9189	40.7745	5.55864	2.6429	14.0588	0	0	0	0	147.449	0	0	34.6347	53.4997	27.5422	69.8022	60.4109	45.9167	94.8426	83.0071	115.924	46.6376	50.8599	35.4401	42.7791	58.0437	26.9202	85.6188	74.8105	14.2702	13.4382	1.35292	148.392	33.1587	3.39941
MTA_Mm-int_dup1000	81.8941	-2.46613	0.719366	-3.42821	0.000607585	0.00889795	Down	MTA_Mm-int	ERVL-MaLR	LTR	MTA_Mm-int:ERVL-MaLR:LTR	8cWT-2cWT	2cWT-2cKO	14.0022	30.6793	34.1174	2.77932	0	17.5735	0	21.0216	8.66229	0	0	813.627	0	300.168	110.542	100.66	134.841	107.35	106.367	62.9291	180.547	87.1608	36.4356	65.5598	91.0517	138.996	64.3409	42.8146	85.1309	62.7443	44.8492	38.5228	48.7052	33.7719	108.95	30.5947
MTA_Mm-int_dup1014	84.5089	-1.58996	0.512693	-3.1012	0.00192738	0.0215268	Down	MTA_Mm-int	ERVL-MaLR	LTR	MTA_Mm-int:ERVL-MaLR:LTR	NA	2cWT-2cKO	15.169	19.4302	14.1462	130.628	42.2864	56.2351	0	42.0432	17.3246	0	73.7243	36.4311	16.1594	23.0898	188.837	171.702	112.856	102.088	86.2789	179.738	137.442	175.774	59.8759	95.9814	149.605	263.391	119.373	88.7795	112.939	12.0662	14.2702	101.234	20.2938	186.257	24.4743	30.5947
MTA_Mm-int_dup1020	5.86393	-2.25257	0.754924	-2.98384	0.00284656	0.0285745	Down	MTA_Mm-int	ERVL-MaLR	LTR	MTA_Mm-int:ERVL-MaLR:LTR	8cWT-2cWT	2cWT-2cKO:8cKO-2cKO	1.16685	3.57925	0.832132	2.77932	0	1.17156	0	0	8.66229	0	0	12.1437	16.1594	23.0898	25.5284	2.18589	3.75576	25.4694	3.8881	6.00969	18.4734	3.1959	9.83762	4.95236	2.10119	7.00818	4.38066	3.72301	3.17107	0	1.0193	3.58352	8.11753	1.02339	3.15797	6.79881
MTA_Mm-int_dup1026	135.627	-5.48122	0.491081	-11.1615	6.28952e-29	9.35461e-26	Down	MTA_Mm-int	ERVL-MaLR	LTR	MTA_Mm-int:ERVL-MaLR:LTR	8cWT-2cWT	2cWT-2cKO:8cWT-8cKO:8cKO-2cKO	9.33477	2.55661	4.99279	5.55864	7.9287	5.85782	44.576	73.5756	17.3246	0	36.8621	24.2874	32.3188	23.0898	322.342	257.935	307.973	374.042	230.787	212.481	250.992	191.173	178.049	212.794	152.967	464.876	321.978	186.437	204.412	16.8927	233.42	121.84	39.2347	101.316	70.2649	268.553
MTA_Mm-int_dup1046	16.3924	-1.51076	0.383348	-3.94097	8.11539e-05	0.00164036	Down	MTA_Mm-int	ERVL-MaLR	LTR	MTA_Mm-int:ERVL-MaLR:LTR	NA	2cWT-2cKO:8cKO-2cKO	5.83423	7.1585	9.98559	8.33796	23.7861	11.7156	11.144	21.0216	17.3246	0	0	0	0	11.5449	36.8879	66.5603	26.6568	30.5212	24.1618	35.5746	24.6312	20.9186	27.934	23.9757	19.331	37.669	7.39236	26.2043	36.5892	7.23973	7.1351	2.68764	2.70584	5.11696	0.789493	3.39941
MTA_Mm-int_dup1047	123.339	-2.78934	0.528138	-5.28147	1.2815e-07	4.84582e-06	Down	MTA_Mm-int	ERVL-MaLR	LTR	MTA_Mm-int:ERVL-MaLR:LTR	NA	2cWT-2cKO	25.6706	10.7377	29.9568	44.4691	52.858	10.5441	55.72	42.0432	34.6492	131.009	110.586	36.4311	48.4783	11.5449	239.405	227.988	219.483	143.765	217.364	223.74	127.097	283.273	155.823	157.611	131.815	248.645	238.746	162.381	162.212	306.482	27.5211	66.2951	12.1763	35.8187	34.7377	482.716
MTA_Mm-int_dup1074	25.8313	-1.87552	0.588669	-3.18603	0.00144238	0.0172892	Down	MTA_Mm-int	ERVL-MaLR	LTR	MTA_Mm-int:ERVL-MaLR:LTR	NA	2cWT-2cKO:8cKO-2cKO	11.6685	16.3623	19.139	2.77932	15.8574	7.02939	0	73.5756	8.66229	0	0	12.1437	0	11.5449	74.2644	43.7178	30.7789	23.154	46.4721	122.819	19.2123	13.3647	9.23036	31.6008	47.9072	84.3902	35.5928	48.6855	50.737	12.0662	41.7913	1.79176	21.6467	2.04678	3.15797	3.39941
MTA_Mm-int_dup1087	21.6907	-1.92246	0.638362	-3.01155	0.00259922	0.0267437	Down	MTA_Mm-int	ERVL-MaLR	LTR	MTA_Mm-int:ERVL-MaLR:LTR	NA	2cWT-2cKO:8cWT-8cKO	8.16793	5.11321	5.82493	22.2346	2.6429	2.34313	11.144	0	0	0	36.8621	0	16.1594	0	42.8731	8.85285	20.5193	22.733	48.0459	20.2395	56.1591	15.6889	46.8805	12.9705	47.6271	35.1869	6.57099	18.9014	11.9525	12.0662	5.0965	29.564	17.588	135.088	69.4754	3.39941
MTA_Mm-int_dup109	2.88104	-3.82111	1.0287	-3.71451	0.000203601	0.00359791	Down	MTA_Mm-int	ERVL-MaLR	LTR	MTA_Mm-int:ERVL-MaLR:LTR	NA	2cWT-2cKO:8cKO-2cKO	0	0	0.832132	2.77932	0	0	0	0	0	0	0	0	0	0	2.56505	4.59037	9.34361	23.996	5.92473	2.62492	2.95574	3.48643	1.21452	9.90472	8.82502	2.48207	15.8799	2.57747	2.43928	0	1.0193	0	0	0	3.15797	0
MTA_Mm-int_dup1092	34.3277	-2.65304	0.511395	-5.18784	2.12751e-07	7.5792e-06	Down	MTA_Mm-int	ERVL-MaLR	LTR	MTA_Mm-int:ERVL-MaLR:LTR	NA	2cWT-2cKO:8cKO-2cKO	26.8375	5.62453	11.6499	5.55864	10.5716	4.68626	44.576	0	17.3246	0	0	0	0	23.0898	89.4105	46.1223	63.1151	92.8265	35.641	53.3274	24.6312	103.431	61.8191	39.6975	52.1096	79.5721	199.32	44.533	45.6146	4.82649	3.0579	4.4794	8.11753	4.09357	34.7377	6.79881
MTA_Mm-int_dup1112	135.059	-1.94857	0.588657	-3.3102	0.000932309	0.0123167	Down	MTA_Mm-int	ERVL-MaLR	LTR	MTA_Mm-int:ERVL-MaLR:LTR	NA	2cWT-2cKO:8cWT-8cKO	2.33369	4.09057	32.4532	38.9105	248.433	39.8332	22.288	31.5324	0	87.3395	36.8621	12.1437	16.1594	0	380.483	289.412	191.452	312.579	140.249	244.532	263.307	339.927	200.639	190.155	184.765	279.013	179.333	169.683	103.182	238.911	30.579	68.9827	71.7049	295.76	149.214	91.784
MTA_Mm-int_dup115	6.24789	-2.09855	0.728767	-2.87959	0.00398196	0.0364089	Down	MTA_Mm-int	ERVL-MaLR	LTR	MTA_Mm-int:ERVL-MaLR:LTR	NA	2cWT-2cKO:8cKO-2cKO	3.50054	4.60189	0.832132	0	2.6429	3.51469	0	10.5108	0	0	0	12.1437	0	0	4.0308	3.27883	10.4429	14.7344	11.0163	3.93738	11.084	46.1952	2.06469	5.3454	33.6191	10.0743	6.0234	2.57747	10.7328	2.41324	2.0386	4.4794	1.35292	0	0	3.39941
MTA_Mm-int_dup1166	7.19239	-1.61534	0.546478	-2.95591	0.00311751	0.0304291	Down	MTA_Mm-int	ERVL-MaLR	LTR	MTA_Mm-int:ERVL-MaLR:LTR	NA	2cWT-2cKO	5.83423	2.55661	0	8.33796	5.2858	2.34313	0	0	0	0	0	0	16.1594	0	11.726	17.3778	13.5574	6.10424	7.40591	8.082	13.5472	14.8173	10.9307	6.28871	7.70438	15.3304	9.85648	8.73476	7.8057	7.23973	2.0386	5.37527	22.9997	4.09357	0.789493	23.7958
MTA_Mm-int_dup1175	30.1156	-2.30894	0.463615	-4.9803	6.34847e-07	2.06896e-05	Down	MTA_Mm-int	ERVL-MaLR	LTR	MTA_Mm-int:ERVL-MaLR:LTR	NA	2cWT-2cKO:8cKO-2cKO	8.16793	13.2943	34.9496	5.55864	2.6429	3.51469	0	0	0	0	73.7243	24.2874	0	11.5449	57.6527	61.8607	55.512	98.7203	22.588	55.1234	71.1842	86.8703	31.3347	42.213	63.5961	80.7401	42.7114	54.2701	83.4234	4.82649	2.0386	9.85467	9.47045	1.02339	1.57899	0
MTA_Mm-int_dup1178	16.345	-2.59727	0.948455	-2.73842	0.00617355	0.0499028	Down	MTA_Mm-int	ERVL-MaLR	LTR	MTA_Mm-int:ERVL-MaLR:LTR	NA	2cWT-2cKO	1.16685	0.511321	8.32132	2.77932	0	10.5441	33.432	0	0	0	0	0	0	0	20.7647	14.7548	23.9086	26.5219	18.7925	20.8612	13.3008	8.13501	20.0396	31.0505	5.88334	47.3052	49.83	23.3404	39.5164	4.82649	0	0	12.1763	0	84.4758	0
MTA_Mm-int_dup1184	155.662	-1.92008	0.444261	-4.32196	1.54652e-05	0.000378087	Down	MTA_Mm-int	ERVL-MaLR	LTR	MTA_Mm-int:ERVL-MaLR:LTR	NA	2cWT-2cKO:8cWT-8cKO:8cKO-2cKO	156.357	139.591	32.4532	30.5725	21.1432	24.6028	44.576	10.5108	95.2852	87.3395	0	85.0059	32.3188	34.6347	267.01	292.909	259.697	298.897	229.583	222.566	243.356	287.05	164.082	199.509	194.15	473.928	213.831	153.216	383.699	74.8105	31.5983	102.13	137.998	254.825	53.6856	380.733
MTA_Mm-int_dup1188	157.84	-2.4908	0.41567	-5.99224	2.06972e-09	1.106e-07	Down	MTA_Mm-int	ERVL-MaLR	LTR	MTA_Mm-int:ERVL-MaLR:LTR	8cWT-2cWT	2cWT-2cKO:8cKO-2cKO	57.1755	53.1774	53.2565	41.6898	10.5716	69.1223	323.176	42.0432	112.61	131.009	184.311	36.4311	64.6377	92.3593	265.666	214.217	266.934	243.959	218.104	251.302	354.197	494.202	157.888	246.675	160.531	325.589	407.949	300.991	150.748	84.4635	11.2123	64.5033	127.175	90.0585	11.8424	101.982
MTA_Mm-int_dup1191	51.3026	-2.04944	0.382094	-5.36369	8.15372e-08	3.18441e-06	Down	MTA_Mm-int	ERVL-MaLR	LTR	MTA_Mm-int:ERVL-MaLR:LTR	NA	2cWT-2cKO:8cKO-2cKO	15.169	35.7925	19.139	25.0139	26.429	24.6028	0	31.5324	34.6492	0	0	12.1437	16.1594	11.5449	179.432	85.359	89.2223	192.599	100.35	133.318	47.2919	108.66	42.8726	68.5469	23.1131	176.665	86.518	96.0824	86.5945	16.8927	8.1544	8.06291	10.8234	28.655	23.6848	10.1982
MTA_Mm-int_dup1193	41.1692	-4.07044	0.856486	-4.75249	2.0093e-06	6.0171e-05	Down	MTA_Mm-int	ERVL-MaLR	LTR	MTA_Mm-int:ERVL-MaLR:LTR	NA	2cWT-2cKO	11.6685	1.02264	0	2.77932	5.2858	4.68626	0	0	8.66229	87.3395	0	12.1437	0	0	106.267	70.9321	94.8101	73.4613	66.7458	64.1724	80.544	47.3574	39.229	79.3164	16.2492	101.473	78.3042	59.8546	68.0559	28.9589	0	27.7723	12.1763	3.07018	2.36848	268.553
MTA_Mm-int_dup1194	19.321	-1.79497	0.451021	-3.97978	6.89782e-05	0.00143655	Down	MTA_Mm-int	ERVL-MaLR	LTR	MTA_Mm-int:ERVL-MaLR:LTR	NA	2cWT-2cKO:8cKO-2cKO	7.00108	10.2264	19.139	22.2346	0	4.68626	0	21.0216	0	0	0	12.1437	0	11.5449	21.7419	52.2428	20.4277	28.8373	21.3846	57.3338	27.5869	28.7631	23.4403	33.0157	36.2806	63.8037	57.2223	48.8287	29.5153	4.82649	3.0579	1.79176	1.35292	6.14035	1.57899	10.1982
MTA_Mm-int_dup120	156.381	-1.90898	0.427275	-4.4678	7.90268e-06	0.000207728	Down	MTA_Mm-int	ERVL-MaLR	LTR	MTA_Mm-int:ERVL-MaLR:LTR	8cWT-2cWT	2cWT-2cKO:8cKO-2cKO	37.3391	143.17	31.621	69.483	18.5003	57.4066	89.152	52.554	649.672	43.6697	0	85.0059	64.6377	126.994	301.699	211.594	226.537	133.662	207.921	240.18	259.859	147.011	194.202	222.856	102.678	384.866	342.786	254.024	163.92	120.662	153.914	69.8786	113.645	163.743	70.2649	47.5917
MTA_Mm-int_dup1231	15.1149	-5.80775	0.999563	-5.81029	6.23663e-09	3.09198e-07	Down	MTA_Mm-int	ERVL-MaLR	LTR	MTA_Mm-int:ERVL-MaLR:LTR	8cWT-2cWT	2cWT-2cKO:8cKO-2cKO	0	0.511321	0	2.77932	0	1.17156	11.144	0	0	0	0	12.1437	0	0	54.1104	54.1008	20.5193	13.4714	14.7193	20.4468	5.41886	65.3706	10.8092	33.3302	20.4516	77.236	59.1389	55.5588	5.12249	0	5.0965	12.5423	4.05877	0	0	0
MTA_Mm-int_dup1322	10.0402	-3.70364	1.12353	-3.29643	0.00097922	0.0128225	Down	MTA_Mm-int	ERVL-MaLR	LTR	MTA_Mm-int:ERVL-MaLR:LTR	NA	2cWT-2cKO	3.50054	1.53396	1.66426	0	0	0	0	0	0	0	73.7243	0	0	0	61.5613	11.8038	7.87794	1.05245	16.7559	39.6501	26.1091	16.27	0.121452	20.9886	0.700398	25.8427	0	6.73006	12.9282	2.41324	1.0193	25.0846	1.35292	1.02339	1.57899	10.1982
MTA_Mm-int_dup1325	234.192	-1.6052	0.56202	-2.85613	0.00428845	0.0386177	Down	MTA_Mm-int	ERVL-MaLR	LTR	MTA_Mm-int:ERVL-MaLR:LTR	NA	2cWT-2cKO:8cWT-8cKO	79.3456	59.3132	32.4532	13.8966	290.719	229.627	11.144	84.0864	34.6492	87.3395	110.586	85.0059	80.7971	80.8144	393.431	340.452	384.645	317.21	227.454	334.056	322.669	472.993	239.504	245.81	307.475	615.698	413.698	343.949	390.529	226.845	162.069	277.723	5.41169	63.4503	16.5794	302.547
MTA_Mm-int_dup1333	23.6306	-5.27738	0.897183	-5.88217	4.0493e-09	2.09484e-07	Down	MTA_Mm-int	ERVL-MaLR	LTR	MTA_Mm-int:ERVL-MaLR:LTR	NA	2cWT-2cKO:8cKO-2cKO	2.33369	1.53396	0	0	5.2858	0	0	21.0216	0	0	0	0	0	23.0898	5.74084	40.7668	21.985	57.043	106.738	38.4068	22.1681	33.7022	123.031	27.1987	19.0508	32.7049	185.904	32.5048	37.321	4.82649	0	7.16703	12.1763	0	12.6319	0
MTA_Mm-int_dup1334	120.825	-2.80129	0.502156	-5.57853	2.42566e-08	1.06372e-06	Down	MTA_Mm-int	ERVL-MaLR	LTR	MTA_Mm-int:ERVL-MaLR:LTR	NA	2cWT-2cKO	57.1755	10.7377	26.6282	11.1173	29.0719	26.946	11.144	21.0216	25.9869	43.6697	184.311	85.0059	64.6377	0	335.167	158.368	216.827	154.079	232.268	181.949	127.097	183.328	125.946	154.545	139.239	310.404	146.204	207.057	155.87	7.23973	33.6369	134.382	357.171	280.409	102.634	23.7958
MTA_Mm-int_dup1339	126.799	-1.71348	0.547017	-3.13241	0.00173377	0.0198743	Down	MTA_Mm-int	ERVL-MaLR	LTR	MTA_Mm-int:ERVL-MaLR:LTR	NA	2cWT-2cKO:8cWT-8cKO	26.8375	68.517	111.506	119.511	0	12.8872	22.288	105.108	34.6492	0	0	12.1437	16.1594	34.6347	244.291	169.079	238.17	177.444	100.998	174.972	130.053	160.085	136.634	149.278	199.333	371.726	193.844	209.777	128.062	224.432	10.193	232.033	73.0578	60.3801	68.6859	523.508
MTA_Mm-int_dup1342	241.374	-3.36778	0.437058	-7.70556	1.30276e-14	1.78859e-12	Down	MTA_Mm-int	ERVL-MaLR	LTR	MTA_Mm-int:ERVL-MaLR:LTR	8cWT-2cWT	2cWT-2cKO:8cWT-8cKO	23.3369	23.0094	28.2925	80.6003	26.429	46.8626	33.432	73.5756	173.246	43.6697	73.7243	97.1495	48.4783	253.988	368.757	482.098	410.844	322.051	296.422	395.88	504.939	549.404	374.801	223.721	223.567	621.976	481.872	294.548	240.757	316.135	109.065	343.122	194.821	15.3509	82.1073	543.905
MTA_Mm-int_dup136	74.9199	-2.27641	0.603702	-3.77075	0.00016276	0.00297942	Down	MTA_Mm-int	ERVL-MaLR	LTR	MTA_Mm-int:ERVL-MaLR:LTR	NA	2cWT-2cKO:8cWT-8cKO	14.0022	81.8114	3.32853	8.33796	37.0006	5.85782	0	42.0432	17.3246	0	0	12.1437	0	34.6347	178.943	163.177	139.696	209.228	112.477	106.931	106.899	73.7961	66.4343	92.6012	87.6898	180.169	186.999	60.8569	80.4963	7.23973	260.941	34.9393	215.115	16.3743	60.791	64.5887
MTA_Mm-int_dup1361	89.7845	-2.6648	0.537476	-4.95798	7.12287e-07	2.30306e-05	Down	MTA_Mm-int	ERVL-MaLR	LTR	MTA_Mm-int:ERVL-MaLR:LTR	NA	2cWT-2cKO:8cWT-8cKO	28.0043	21.4755	11.6499	8.33796	21.1432	32.8038	11.144	0	0	0	0	0	0	34.6347	203.739	83.6103	135.207	218.069	111.644	221.737	98.2785	104.012	125.582	110.21	74.1021	103.663	151.133	71.5964	162.456	296.829	18.3474	401.354	18.9409	46.0526	15.0004	234.559
MTA_Mm-int_dup1376	10.5111	-2.11289	0.71001	-2.97586	0.00292165	0.0290343	Down	MTA_Mm-int	ERVL-MaLR	LTR	MTA_Mm-int:ERVL-MaLR:LTR	8cWT-8cKO	2cWT-2cKO:8cKO-2cKO	7.00108	1.02264	3.32853	11.1173	0	0	55.72	0	0	43.6697	36.8621	0	0	0	5.98513	6.33908	15.8475	15.7868	10.7386	18.1672	10.3451	8.13501	13.6026	32.0724	6.8639	51.1013	8.76131	5.29813	13.66	0	2.0386	0	1.35292	4.09357	0	0
MTA_Mm-int_dup1421	188.191	-2.01521	0.422228	-4.77281	1.81673e-06	5.4772e-05	Down	MTA_Mm-int	ERVL-MaLR	LTR	MTA_Mm-int:ERVL-MaLR:LTR	NA	2cWT-2cKO:8cKO-2cKO	190.196	115.559	59.0814	44.4691	23.7861	37.4901	89.152	31.5324	95.2852	87.3395	184.311	60.7185	64.6377	46.1796	359.841	331.709	308.339	324.577	238.841	241.147	284.737	485.195	184.972	256.579	381.717	616.72	363.321	180.566	249.295	55.5046	74.4089	239.2	86.587	180.117	72.6334	312.745
MTA_Mm-int_dup1429	85.3399	-1.05023	0.376679	-2.78814	0.00530117	0.0449265	Down	MTA_Mm-int	ERVL-MaLR	LTR	MTA_Mm-int:ERVL-MaLR:LTR	NA	2cWT-2cKO	140.022	33.2359	30.7889	55.5864	10.5716	76.1517	22.288	105.108	34.6492	87.3395	110.586	24.2874	16.1594	23.0898	163.675	116.836	124.307	92.616	140.712	123.51	109.363	71.4719	86.9597	130.727	72.7013	230.102	145.109	57.5635	140.015	86.8767	59.1194	71.6703	109.587	28.655	145.267	44.1923
MTA_Mm-int_dup1448	10.6678	-3.30495	0.848894	-3.89325	9.89115e-05	0.00195285	Down	MTA_Mm-int	ERVL-MaLR	LTR	MTA_Mm-int:ERVL-MaLR:LTR	NA	2cWT-2cKO:8cKO-2cKO	2.33369	1.53396	4.16066	0	0	2.34313	0	0	17.3246	0	0	0	48.4783	0	23.2076	15.3012	29.8629	10.9455	2.03663	22.5191	14.7787	38.6413	2.91485	13.9138	35.5802	1.75205	21.0819	48.256	11.2207	2.41324	0	16.1258	1.35292	2.04678	0	0
MTA_Mm-int_dup1480	60.6118	-2.04432	0.643845	-3.17518	0.00149742	0.0177818	Down	MTA_Mm-int	ERVL-MaLR	LTR	MTA_Mm-int:ERVL-MaLR:LTR	NA	2cWT-2cKO	17.5027	1.53396	77.3883	16.6759	0	23.4313	55.72	10.5108	8.66229	0	36.8621	36.4311	0	11.5449	180.653	111.48	73.9244	85.8803	152.654	108.658	77.8346	123.478	51.2528	62.0224	53.6505	183.965	45.9969	32.0752	87.8141	55.5046	5.0965	37.6269	41.9406	72.6608	1.57899	71.3875
MTA_Mm-int_dup1508	357.971	-1.51099	0.497998	-3.03414	0.00241226	0.0252961	Down	MTA_Mm-int	ERVL-MaLR	LTR	MTA_Mm-int:ERVL-MaLR:LTR	NA	2cWT-2cKO:8cWT-8cKO	150.523	144.193	9.98559	686.492	26.429	219.083	156.016	105.108	155.921	43.6697	110.586	72.8622	32.3188	173.174	549.044	407.996	584.983	599.268	467.869	692.496	521.935	962.836	278.125	509.385	483.975	1039.99	722.261	411.536	538.837	193.059	229.342	365.519	331.466	167.836	71.0544	951.834
MTA_Mm-int_dup1523	10.4495	-2.02384	0.659384	-3.06929	0.00214566	0.0234081	Down	MTA_Mm-int	ERVL-MaLR	LTR	MTA_Mm-int:ERVL-MaLR:LTR	NA	2cWT-2cKO	2.33369	8.18114	2.4964	2.77932	2.6429	4.68626	0	0	17.3246	0	0	36.4311	0	0	30.9028	8.85285	10.2596	3.36786	7.49849	11.8812	72.4157	5.22965	6.07261	12.7346	13.1675	8.90623	10.9516	11.7418	36.5892	14.4795	5.0965	14.3341	6.76461	15.3509	3.15797	0
MTA_Mm-int_dup1529	5.05755	-3.78237	1.28463	-2.94433	0.00323649	0.0312927	Down	MTA_Mm-int	ERVL-MaLR	LTR	MTA_Mm-int:ERVL-MaLR:LTR	8cWT-2cWT	2cWT-2cKO	0	1.53396	0	0	0	0	0	0	0	0	0	36.4311	0	11.5449	2.32076	40.7668	1.64887	0.841964	4.2584	5.59523	9.85248	0.290536	8.50165	2.35827	2.94167	10.9503	0.821373	9.8803	0.975712	0	4.0772	4.4794	27.0584	0	0	0
MTA_Mm-int_dup1530	82.2317	-2.04968	0.710663	-2.88418	0.00392429	0.0360634	Down	MTA_Mm-int	ERVL-MaLR	LTR	MTA_Mm-int:ERVL-MaLR:LTR	NA	2cWT-2cKO	11.6685	22.4981	6.65706	16.6759	2.6429	115.985	55.72	10.5108	0	0	184.311	24.2874	16.1594	0	141.811	131.263	91.4208	85.4593	87.3898	84.8264	50.7403	228.652	74.6931	81.9891	200.874	132.717	174.405	82.479	189.532	24.1324	4.0772	93.1714	14.8821	21.4912	14.2109	482.716
MTA_Mm-int_dup155	20.8105	-4.18941	1.01335	-4.13422	3.56166e-05	0.000794606	Down	MTA_Mm-int	ERVL-MaLR	LTR	MTA_Mm-int:ERVL-MaLR:LTR	NA	2cWT-2cKO	0	5.62453	2.4964	0	0	1.17156	11.144	0	17.3246	0	36.8621	0	16.1594	0	23.5741	15.6291	30.6873	0.631473	26.5687	51.1169	52.7108	115.924	32.3063	8.33254	41.7437	24.3826	3.28549	21.9085	56.8352	7.23973	7.1351	2.68764	152.88	2.04678	1.57899	0
MTA_Mm-int_dup1554	11.1375	-2.74359	0.860623	-3.18791	0.00143304	0.0172351	Down	MTA_Mm-int	ERVL-MaLR	LTR	MTA_Mm-int:ERVL-MaLR:LTR	NA	2cWT-2cKO:8cKO-2cKO	1.16685	3.06793	5.82493	2.77932	5.2858	1.17156	0	0	0	0	36.8621	12.1437	0	0	74.6309	10.0551	3.20614	10.735	8.70195	15.6114	42.8583	40.3845	3.52211	5.18819	2.52143	47.5972	40.7949	1.71831	12.4403	2.41324	3.0579	0	1.35292	0	0	16.997
MTA_Mm-int_dup1563	8.5806	-2.02249	0.70861	-2.85416	0.00431508	0.0387655	Down	MTA_Mm-int	ERVL-MaLR	LTR	MTA_Mm-int:ERVL-MaLR:LTR	NA	2cWT-2cKO	4.66739	2.04528	0.832132	2.77932	0	3.51469	0	0	0	87.3395	0	0	16.1594	0	18.1997	9.29003	7.23672	5.05178	8.42423	10.776	4.92624	13.3647	4.25083	4.55931	7.70438	10.8043	28.2005	5.44133	6.34213	2.41324	3.0579	2.68764	0	4.09357	0	20.3964
MTA_Mm-int_dup1568	67.9996	-2.17099	0.404455	-5.36769	7.97494e-08	3.12142e-06	Down	MTA_Mm-int	ERVL-MaLR	LTR	MTA_Mm-int:ERVL-MaLR:LTR	NA	2cWT-2cKO:8cWT-8cKO	29.1712	22.4981	17.4748	11.1173	47.5722	19.9166	0	10.5108	43.3115	43.6697	73.7243	48.5748	0	0	182.73	81.7523	131.727	183.759	63.6909	93.392	61.578	126.674	108.457	114.219	85.4486	104.539	107.326	73.8875	124.159	14.4795	35.6755	70.7744	142.057	18.4211	135.003	61.1893
MTA_Mm-int_dup1570	52.3835	-5.00916	0.698855	-7.16767	7.62858e-13	7.81104e-11	Down	MTA_Mm-int	ERVL-MaLR	LTR	MTA_Mm-int:ERVL-MaLR:LTR	8cWT-2cWT	2cWT-2cKO:8cWT-8cKO	1.16685	4.60189	0.832132	2.77932	2.6429	1.17156	0	10.5108	8.66229	0	36.8621	12.1437	0	46.1796	68.7679	62.2979	91.9704	140.818	40.3622	67.9717	56.1591	133.356	63.6409	46.3792	26.1949	80.4481	85.6966	60.8569	58.7867	135.142	34.6562	29.564	27.0584	51.1696	9.47392	421.526
MTA_Mm-int_dup1580	14.5172	-1.50622	0.482408	-3.1223	0.00179443	0.0204515	Down	MTA_Mm-int	ERVL-MaLR	LTR	MTA_Mm-int:ERVL-MaLR:LTR	NA	2cWT-2cKO:8cKO-2cKO	12.8353	11.2491	0	13.8966	10.5716	3.51469	0	21.0216	0	0	36.8621	0	16.1594	11.5449	52.6447	18.1429	25.4659	28.6268	32.4934	15.4732	12.5619	25.8577	10.0805	18.6303	8.68494	47.0132	23.8198	10.0235	23.661	7.23973	2.0386	6.27115	6.76461	10.2339	2.36848	6.79881
MTA_Mm-int_dup1591	126.002	-1.9141	0.591599	-3.23546	0.00121446	0.0152431	Down	MTA_Mm-int	ERVL-MaLR	LTR	MTA_Mm-int:ERVL-MaLR:LTR	NA	2cWT-2cKO	31.5049	14.8283	10.8177	108.393	23.7861	53.892	55.72	94.5972	34.6492	87.3395	110.586	85.0059	96.9565	11.5449	283.255	249.847	191.452	155.342	111.829	155.699	56.6517	117.086	92.9109	126.167	91.6121	223.678	188.642	95.9392	115.866	335.441	280.307	101.234	319.29	7.16374	2.36848	27.1952
MTA_Mm-int_dup160	5.50595	-2.68424	0.903404	-2.97125	0.00296593	0.0293111	Down	MTA_Mm-int	ERVL-MaLR	LTR	MTA_Mm-int:ERVL-MaLR:LTR	NA	2cWT-2cKO:8cKO-2cKO	1.16685	2.55661	0.832132	0	2.6429	1.17156	0	0	25.9869	0	0	0	0	11.5449	1.09931	10.7109	11.6337	3.78884	0.925739	4.76631	3.20206	0.871608	35.9498	8.8828	11.6266	5.25614	4.10687	12.7442	25.1246	2.41324	9.1737	0	1.35292	0	0.789493	3.39941
MTA_Mm-int_dup1607	290.146	-2.2516	0.538995	-4.17741	2.94844e-05	0.000669514	Down	MTA_Mm-int	ERVL-MaLR	LTR	MTA_Mm-int:ERVL-MaLR:LTR	NA	2cWT-2cKO:8cWT-8cKO	36.1722	62.8925	17.4748	302.946	10.5716	42.1763	22.288	63.0648	77.9606	87.3395	258.035	36.4311	96.9565	34.6347	508.98	270.722	440.615	301.213	229.213	366.315	387.449	620.294	297.072	237.242	298.65	366.762	454.493	389.484	381.016	1307.98	200.802	201.573	22.9997	231.287	193.426	870.248
MTA_Mm-int_dup1614	3.18948	-3.08891	0.951463	-3.24648	0.0011684	0.0148003	Down	MTA_Mm-int	ERVL-MaLR	LTR	MTA_Mm-int:ERVL-MaLR:LTR	NA	2cWT-2cKO:8cKO-2cKO	1.16685	0	0	0	2.6429	2.34313	0	0	0	0	0	0	0	0	16.7339	4.48107	14.8398	1.26295	1.01831	4.76631	1.47787	7.84447	11.2951	3.45879	1.4008	8.17621	14.5109	6.44368	14.1478	0	0	0	0	0	0	0
MTA_Mm-int_dup1677	18.7962	-2.97713	0.55929	-5.32305	1.02044e-07	3.90835e-06	Down	MTA_Mm-int	ERVL-MaLR	LTR	MTA_Mm-int:ERVL-MaLR:LTR	8cWT-2cWT	2cWT-2cKO:8cKO-2cKO	5.83423	1.53396	3.32853	0	2.6429	5.85782	11.144	0	8.66229	0	147.449	0	0	34.6347	33.1014	15.4105	13.5574	13.6819	44.8058	13.1246	24.3849	30.5063	23.3188	40.1691	40.3429	29.3468	16.4275	16.4672	41.4678	7.23973	11.2123	5.37527	1.35292	5.11696	17.3689	30.5947
MTA_Mm-int_dup1697	17.0416	-2.22135	0.724583	-3.0657	0.00217165	0.0236214	Down	MTA_Mm-int	ERVL-MaLR	LTR	MTA_Mm-int:ERVL-MaLR:LTR	NA	2cWT-2cKO	7.00108	9.20378	0	13.8966	2.6429	2.34313	11.144	0	0	0	0	12.1437	16.1594	0	73.7759	26.1214	31.6034	32.8366	11.6643	27.9761	19.2123	51.7154	37.1644	12.7346	22.6929	18.6885	12.8682	15.3216	2.92714	4.82649	14.2702	51.0651	1.35292	2.04678	2.36848	78.1863
MTA_Mm-int_dup1698	9.24849	-3.12237	0.924333	-3.37797	0.000730218	0.0102303	Down	MTA_Mm-int	ERVL-MaLR	LTR	MTA_Mm-int:ERVL-MaLR:LTR	NA	2cWT-2cKO	1.16685	5.62453	0.832132	0	0	1.17156	0	0	8.66229	0	0	12.1437	0	23.0898	7.20658	9.72721	12.3665	41.4667	6.3876	2.55585	22.4144	58.9788	23.6832	7.78228	7.5643	10.2203	2.46412	19.331	2.19535	4.82649	0	1.79176	12.1763	0	0	27.1952
MTA_Mm-int_dup1748	20.374	-3.04133	0.844419	-3.60169	0.000316156	0.00520069	Down	MTA_Mm-int	ERVL-MaLR	LTR	MTA_Mm-int:ERVL-MaLR:LTR	NA	2cWT-2cKO	2.33369	11.2491	1.66426	8.33796	0	2.34313	22.288	0	0	0	0	12.1437	0	0	38.3537	77.0526	37.7408	38.9408	33.1415	66.5211	47.2919	15.1079	27.934	41.4269	14.9885	62.4896	9.58269	33.0775	2.92714	0	1.0193	27.7723	6.76461	103.363	0	3.39941
MTA_Mm-int_dup1758	330.303	-2.12381	0.579441	-3.66528	0.00024707	0.00424011	Down	MTA_Mm-int	ERVL-MaLR	LTR	MTA_Mm-int:ERVL-MaLR:LTR	NA	2cWT-2cKO	12.8353	91.0152	11.6499	447.471	100.43	23.4313	913.808	136.64	43.3115	174.679	36.8621	48.5748	80.7971	80.8144	530.722	359.688	760.863	675.044	522.209	491.689	466.761	493.621	318.812	449.171	301.311	781.12	414.52	276.792	563.962	434.384	152.895	437.189	627.756	136.111	65.528	598.295
MTA_Mm-int_dup178	12.8752	-3.30065	1.14203	-2.89015	0.00385055	0.0354799	Down	MTA_Mm-int	ERVL-MaLR	LTR	MTA_Mm-int:ERVL-MaLR:LTR	8cWT-8cKO:8cWT-2cWT	2cWT-2cKO	2.33369	2.04528	0.832132	0	0	0	0	262.77	0	0	0	12.1437	0	0	3.42007	5.68331	8.15276	17.0498	18.0519	14.2298	2.46312	30.5063	26.598	0.864698	1.12064	12.7023	1.91654	1.57512	11.9525	2.41324	0	1.79176	29.7643	1.02339	1.57899	3.39941
MTA_Mm-int_dup1797	164.165	-1.73801	0.406043	-4.28036	1.86594e-05	0.000447024	Down	MTA_Mm-int	ERVL-MaLR	LTR	MTA_Mm-int:ERVL-MaLR:LTR	NA	2cWT-2cKO:8cKO-2cKO	102.682	59.8246	93.1988	83.3796	34.3577	118.328	222.88	84.0864	8.66229	87.3395	36.8621	12.1437	48.4783	23.0898	283.133	134.432	313.377	225.646	215.327	313.264	316.265	468.344	181.814	180.407	248.361	376.69	438.887	184.003	237.83	195.473	234.439	194.406	112.293	37.8655	77.3704	20.3964
MTA_Mm-int_dup1852	119.414	-2.39639	0.51536	-4.64993	3.32046e-06	9.48217e-05	Down	MTA_Mm-int	ERVL-MaLR	LTR	MTA_Mm-int:ERVL-MaLR:LTR	NA	2cWT-2cKO	64.1766	27.6113	5.82493	83.3796	21.1432	24.6028	33.432	31.5324	225.22	0	110.586	36.4311	0	34.6347	196.043	162.521	173.132	100.825	146.73	260.834	375.626	243.179	144.407	177.577	125.651	391.874	173.857	171.115	100.011	284.763	65.2352	33.1475	82.5282	50.1462	26.8428	210.763
MTA_Mm-int_dup1853	40.0594	-3.1868	0.711593	-4.4784	7.52044e-06	0.000199147	Down	MTA_Mm-int	ERVL-MaLR	LTR	MTA_Mm-int:ERVL-MaLR:LTR	NA	2cWT-2cKO	10.5016	10.7377	5.82493	2.77932	10.5716	3.51469	11.144	21.0216	0	43.6697	36.8621	24.2874	0	57.7245	45.5603	70.1671	72.7336	141.66	14.8118	57.5411	37.4394	111.566	47.6092	46.6937	18.7707	149.362	36.688	48.3992	113.183	4.82649	5.0965	76.1497	119.057	19.4444	0	6.79881
MTA_Mm-int_dup1871	5.97283	-2.611	0.851666	-3.06576	0.00217118	0.0236214	Down	MTA_Mm-int	ERVL-MaLR	LTR	MTA_Mm-int:ERVL-MaLR:LTR	8cWT-8cKO	2cWT-2cKO:8cKO-2cKO	0	2.04528	0.832132	0	0	2.34313	0	0	0	0	110.586	0	0	0	3.66436	8.96215	3.48095	9.68258	2.68464	4.21369	2.70943	15.3984	12.631	10.0619	2.66151	16.2064	2.73791	2.14789	4.87856	0	1.0193	0	0	2.04678	0	0
MTA_Mm-int_dup1929	4.20855	-3.04347	1.01418	-3.00091	0.00269175	0.0274214	Down	MTA_Mm-int	ERVL-MaLR	LTR	MTA_Mm-int:ERVL-MaLR:LTR	NA	2cWT-2cKO	2.33369	0.511321	0	0	0	2.34313	0	0	0	0	0	0	0	11.5449	31.3914	7.54132	12.0001	14.9449	2.22177	4.62815	0.738936	20.9186	6.19406	1.808	2.24127	7.4462	3.55928	3.15024	1.21964	2.41324	0	1.79176	1.35292	0	13.4214	0
MTA_Mm-int_dup1938	122.35	-1.10308	0.35523	-3.10525	0.0019012	0.0213322	Down	MTA_Mm-int	ERVL-MaLR	LTR	MTA_Mm-int:ERVL-MaLR:LTR	NA	2cWT-2cKO:8cKO-2cKO	107.35	100.73	69.067	36.1312	142.717	42.1763	44.576	126.13	34.6492	43.6697	73.7243	60.7185	96.9565	92.3593	213.022	212.578	239.453	132.609	138.491	157.495	149.758	221.388	150.844	158.475	168.656	245.87	248.055	108.54	129.038	16.8927	107.026	58.2321	18.9409	219.006	78.9493	135.976
MTA_Mm-int_dup1950	12.4626	-2.05957	0.668308	-3.08177	0.00205774	0.0226987	Down	MTA_Mm-int	ERVL-MaLR	LTR	MTA_Mm-int:ERVL-MaLR:LTR	NA	2cWT-2cKO	2.33369	2.04528	1.66426	11.1173	0	5.85782	0	0	8.66229	0	73.7243	12.1437	16.1594	0	21.009	37.9252	13.3742	5.26227	7.31334	8.42738	5.41886	7.55394	3.88647	7.38923	10.3659	28.9088	27.6529	6.73006	28.7835	14.4795	3.0579	24.1887	12.1763	1.02339	7.10544	40.7929
MTA_Mm-int_dup196	7.06629	-2.43013	0.819633	-2.9649	0.00302782	0.0297089	Down	MTA_Mm-int	ERVL-MaLR	LTR	MTA_Mm-int:ERVL-MaLR:LTR	NA	2cWT-2cKO:8cKO-2cKO	4.66739	0.511321	0.832132	8.33796	2.6429	0	0	0	0	43.6697	0	0	0	0	11.1152	6.44837	6.22907	0.841964	31.5677	38.7521	7.38936	0.871608	11.538	2.20105	12.327	23.2146	13.6896	4.43898	24.1489	2.41324	0	1.79176	0	1.02339	0.789493	0
MTA_Mm-int_dup2007	20.0474	-1.64214	0.508481	-3.22951	0.00124003	0.0154928	Down	MTA_Mm-int	ERVL-MaLR	LTR	MTA_Mm-int:ERVL-MaLR:LTR	NA	2cWT-2cKO:8cKO-2cKO	25.6706	7.1585	19.9712	5.55864	7.9287	5.85782	11.144	0	0	0	0	12.1437	0	34.6347	99.915	33.2255	43.5119	22.733	8.23908	42.206	25.6164	100.816	13.8455	23.9757	34.5997	25.8427	26.8315	54.6996	22.4414	9.65297	3.0579	2.68764	2.70584	4.09357	0.789493	10.1982
MTA_Mm-int_dup2014	70.3235	-1.84499	0.527762	-3.49588	0.00047251	0.00718587	Down	MTA_Mm-int	ERVL-MaLR	LTR	MTA_Mm-int:ERVL-MaLR:LTR	NA	2cWT-2cKO:8cKO-2cKO	95.6814	13.2943	4.99279	47.2484	5.2858	33.9754	33.432	31.5324	848.905	0	36.8621	12.1437	32.3188	69.2694	184.195	107.109	119.268	127.558	88.5932	100.99	126.851	114.181	36.4356	111.86	88.8105	269.085	146.752	100.521	75.8616	12.0662	9.1737	86.0044	33.823	127.924	18.1583	3.39941
MTA_Mm-int_dup2018	77.9727	-3.9515	0.617812	-6.39596	1.59546e-10	1.00621e-08	Down	MTA_Mm-int	ERVL-MaLR	LTR	MTA_Mm-int:ERVL-MaLR:LTR	NA	2cWT-2cKO:8cWT-8cKO	12.8353	3.06793	4.99279	11.1173	5.2858	5.85782	11.144	0	17.3246	0	36.8621	24.2874	0	11.5449	119.947	79.8943	103.604	92.195	83.6868	105.619	99.0174	112.437	92.1822	103.528	25.2143	190.827	214.105	115.843	84.887	400.598	8.1544	152.299	33.823	288.597	6.31595	16.997
MTA_Mm-int_dup2031	180.874	-1.48527	0.432672	-3.43279	0.000597408	0.00876133	Down	MTA_Mm-int	ERVL-MaLR	LTR	MTA_Mm-int:ERVL-MaLR:LTR	NA	2cWT-2cKO:8cKO-2cKO	121.352	87.9472	158.105	161.201	21.1432	78.4948	66.864	105.108	77.9606	0	184.311	60.7185	32.3188	34.6347	320.51	232.251	270.049	187.968	312.715	230.026	282.027	445.392	178.049	314.986	170.197	482.981	423.281	245.289	308.569	41.0251	71.351	286.681	142.057	170.906	10.2634	329.742
MTA_Mm-int_dup2037	533.105	-1.12104	0.354803	-3.15963	0.0015797	0.0184399	Down	MTA_Mm-int	ERVL-MaLR	LTR	MTA_Mm-int:ERVL-MaLR:LTR	NA	2cWT-2cKO:8cKO-2cKO	351.221	395.763	144.791	177.877	261.647	726.37	189.448	725.246	658.334	131.009	294.897	1020.07	129.275	103.904	1070.6	760.471	868.131	587.27	522.487	689.595	484.249	1123.79	582.97	557.416	638.623	1086.12	869.834	741.739	626.895	497.128	435.241	316.245	366.642	140.205	371.062	418.127
MTA_Mm-int_dup2048	160.463	-1.67253	0.468595	-3.56923	0.00035803	0.00575686	Down	MTA_Mm-int	ERVL-MaLR	LTR	MTA_Mm-int:ERVL-MaLR:LTR	NA	2cWT-2cKO	85.1798	83.3453	135.638	105.614	15.8574	11.7156	22.288	578.094	43.3115	43.6697	73.7243	97.1495	0	46.1796	210.579	180.227	217.01	398.038	201.719	233.963	239.169	289.374	167.725	140.081	280.72	276.239	186.999	226.817	251.246	260.63	135.567	154.091	131.233	142.251	61.5805	67.9881
MTA_Mm-int_dup2052	2.8416	-4.34258	1.41973	-3.05873	0.00222277	0.0239362	Down	MTA_Mm-int	ERVL-MaLR	LTR	MTA_Mm-int:ERVL-MaLR:LTR	NA	2cWT-2cKO:8cKO-2cKO	0	0	0	0	2.6429	0	0	0	0	0	0	0	0	0	0.488582	0.546472	3.75576	4.42031	5.92473	2.97031	35.9615	21.2091	1.33597	0.314435	0.420239	23.0686	0.547582	1.28874	0.243928	0	0	0	0	0	0	0
MTA_Mm-int_dup2053	6.37978	-4.788	1.42784	-3.35331	0.000798519	0.0109294	Down	MTA_Mm-int	ERVL-MaLR	LTR	MTA_Mm-int:ERVL-MaLR:LTR	NA	2cWT-2cKO	0	0.511321	0.832132	0	0	0	0	0	0	0	0	0	0	0	4.51938	7.65061	11.1757	2.10491	7.68363	58.2318	0.738936	2.90536	0.971617	6.52454	37.5413	15.1844	0.273791	16.6104	8.04963	0	0	53.7527	0	0	0.789493	0
MTA_Mm-int_dup2097	4.91071	-2.82293	0.733209	-3.85011	0.000118066	0.00227319	Down	MTA_Mm-int	ERVL-MaLR	LTR	MTA_Mm-int:ERVL-MaLR:LTR	NA	2cWT-2cKO:8cKO-2cKO	2.33369	1.53396	1.66426	0	0	0	0	0	0	43.6697	0	0	0	0	7.20658	21.4217	5.86266	3.15736	6.20245	8.70369	9.85248	16.27	1.33597	6.91758	5.88334	14.1624	6.84478	4.43898	7.07391	2.41324	2.0386	0.895879	0	1.02339	0.789493	0
MTA_Mm-int_dup2115	79.2242	-2.81296	0.532152	-5.28601	1.25015e-07	4.73729e-06	Down	MTA_Mm-int	ERVL-MaLR	LTR	MTA_Mm-int:ERVL-MaLR:LTR	NA	2cWT-2cKO	17.5027	23.0094	13.3141	11.1173	7.9287	25.7744	22.288	199.705	25.9869	43.6697	0	36.4311	0	0	112.618	61.6421	139.055	76.6187	114.051	84.5501	43.1046	133.356	96.7974	89.1425	96.2347	396.108	164.822	62.4321	102.206	74.8105	15.2895	25.9805	31.1172	90.0585	168.162	220.961
MTA_Mm-int_dup2129	2.83272	-2.91837	1.00822	-2.89458	0.00379672	0.0351837	Down	MTA_Mm-int	ERVL-MaLR	LTR	MTA_Mm-int:ERVL-MaLR:LTR	NA	2cWT-2cKO:8cKO-2cKO	2.33369	1.53396	0	0	0	0	0	0	0	0	0	0	0	0	1.46575	3.71601	12.9162	7.36718	8.60937	3.52292	1.47787	12.7836	1.82178	1.96522	1.12064	10.0743	5.20203	21.4789	0.975712	0	4.0772	0	0	0	2.36848	0
MTA_Mm-int_dup213	147.557	-2.33295	0.46171	-5.05286	4.35243e-07	1.46294e-05	Down	MTA_Mm-int	ERVL-MaLR	LTR	MTA_Mm-int:ERVL-MaLR:LTR	NA	2cWT-2cKO:8cWT-8cKO	114.351	16.3623	44.9351	94.4969	7.9287	10.5441	33.432	52.554	34.6492	0	36.8621	60.7185	16.1594	46.1796	328.938	214.654	228.735	191.126	200.33	253.789	319.713	235.334	253.106	190.233	145.122	303.104	306.098	199.754	243.44	33.7854	233.42	48.3775	94.7045	27.6316	226.585	163.171
MTA_Mm-int_dup214	37.4046	-1.85803	0.609138	-3.05026	0.00228644	0.0243777	Down	MTA_Mm-int	ERVL-MaLR	LTR	MTA_Mm-int:ERVL-MaLR:LTR	NA	2cWT-2cKO	11.6685	15.851	9.15346	27.7932	10.5716	26.946	0	10.5108	8.66229	0	0	12.1437	32.3188	92.3593	88.0669	97.7093	78.5962	18.3127	54.0632	34.3312	16.7492	73.5056	45.1802	17.7656	43.985	151.698	79.6732	52.9813	64.1531	28.9589	10.193	89.5879	2.70584	2.04678	63.1595	3.39941
MTA_Mm-int_dup2145	174.833	-2.74354	0.570009	-4.81315	1.48567e-06	4.52497e-05	Down	MTA_Mm-int	ERVL-MaLR	LTR	MTA_Mm-int:ERVL-MaLR:LTR	NA	2cWT-2cKO	36.1722	43.4623	3.32853	130.628	5.2858	37.4901	44.576	199.705	17.3246	0	184.311	85.0059	64.6377	23.0898	450.106	151.701	339.851	249.853	240.414	211.928	209.119	396.291	200.518	230.56	236.034	529.118	405.211	194.026	191.24	217.192	27.5211	86.0044	228.644	23.538	19.7373	411.328
MTA_Mm-int_dup2180	440.77	-2.10224	0.49269	-4.26687	1.98235e-05	0.000469954	Down	MTA_Mm-int	ERVL-MaLR	LTR	MTA_Mm-int:ERVL-MaLR:LTR	8cWT-2cWT	2cWT-2cKO	134.187	114.536	48.2637	269.594	26.429	151.132	66.864	325.835	103.948	305.688	368.621	85.0059	2456.23	138.539	490.414	481.551	493.654	701.987	374.924	386.831	585.976	848.365	380.388	365.138	460.021	738.487	696.251	453.921	509.566	284.763	559.596	413.896	227.291	404.24	202.11	870.248
MTA_Mm-int_dup220	82.862	-1.78653	0.642294	-2.78148	0.00541116	0.0455988	Down	MTA_Mm-int	ERVL-MaLR	LTR	MTA_Mm-int:ERVL-MaLR:LTR	NA	2cWT-2cKO	87.5135	11.7604	11.6499	41.6898	37.0006	22.2597	44.576	94.5972	0	87.3395	36.8621	48.5748	32.3188	0	150.85	57.8168	117.162	201.019	129.974	144.233	80.2977	185.653	77.9723	70.6694	43.5648	260.179	177.964	75.033	44.6388	12.0662	125.374	7.16703	101.469	4.09357	24.4743	23.7958
MTA_Mm-int_dup2202	30.1286	-1.82924	0.498892	-3.6666	0.000245799	0.00422234	Down	MTA_Mm-int	ERVL-MaLR	LTR	MTA_Mm-int:ERVL-MaLR:LTR	NA	2cWT-2cKO	32.6717	9.7151	19.9712	5.55864	5.2858	7.02939	11.144	10.5108	17.3246	43.6697	0	0	16.1594	0	76.0966	45.4665	63.7564	55.5696	62.2097	21.9665	27.5869	29.0536	25.9908	57.5417	19.331	60.5916	56.9485	52.5518	83.4234	55.5046	11.2123	26.8764	4.05877	76.7544	11.8424	6.79881
MTA_Mm-int_dup2221	126.046	-2.01123	0.581077	-3.4612	0.000537771	0.00804538	Down	MTA_Mm-int	ERVL-MaLR	LTR	MTA_Mm-int:ERVL-MaLR:LTR	NA	2cWT-2cKO:8cKO-2cKO	238.037	80.7887	1.66426	30.5725	10.5716	7.02939	33.432	21.0216	25.9869	87.3395	36.8621	12.1437	32.3188	23.0898	241.97	231.704	333.347	377.621	181.815	267.604	275.13	244.341	111.372	221.127	176.22	332.889	246.686	169.97	330.523	48.2649	1.0193	25.0846	45.9993	39.9123	7.89493	98.5828
MTA_Mm-int_dup2242	26.579	-2.35567	0.699541	-3.36745	0.00075867	0.0105529	Down	MTA_Mm-int	ERVL-MaLR	LTR	MTA_Mm-int:ERVL-MaLR:LTR	NA	2cWT-2cKO	5.83423	17.8962	4.99279	13.8966	0	5.85782	0	0	77.9606	0	0	0	16.1594	11.5449	87.7004	22.1868	57.8937	22.312	44.9909	42.7586	30.2964	61.5936	11.9023	65.9528	15.4088	68.6218	20.5343	47.3968	33.4181	28.9589	0	42.1063	1.35292	67.5439	7.10544	3.39941
MTA_Mm-int_dup2274	50.0009	-1.67666	0.381001	-4.40068	1.07914e-05	0.000275151	Down	MTA_Mm-int	ERVL-MaLR	LTR	MTA_Mm-int:ERVL-MaLR:LTR	NA	2cWT-2cKO:8cKO-2cKO	35.0054	24.5434	33.2853	22.2346	42.2864	16.4019	11.144	21.0216	0	0	0	48.5748	32.3188	0	182.363	94.4304	140.246	120.401	67.0235	112.112	59.3612	71.1813	58.1756	74.9929	66.6779	81.6161	104.314	76.7513	70.0074	14.4795	6.1158	29.564	2.70584	15.3509	51.3171	13.5976
MTA_Mm-int_dup2279	12.049	-3.65492	1.22374	-2.98667	0.00282033	0.0284231	Down	MTA_Mm-int	ERVL-MaLR	LTR	MTA_Mm-int:ERVL-MaLR:LTR	8cWT-8cKO:8cWT-2cWT	2cWT-2cKO:8cKO-2cKO	0	0.511321	0.832132	0	0	1.17156	0	0	25.9869	0	0	0	0	300.168	14.9017	10.4923	18.2292	1.26295	1.57376	10.9832	0.985248	0.871608	17.3677	1.25774	11.9068	6.13216	0.547582	4.0094	9.75712	4.82649	2.0386	0	0	0	0	0
MTA_Mm-int_dup2294	114.921	-2.83793	0.539123	-5.26398	1.40974e-07	5.2638e-06	Down	MTA_Mm-int	ERVL-MaLR	LTR	MTA_Mm-int:ERVL-MaLR:LTR	NA	2cWT-2cKO:8cWT-8cKO	28.0043	29.1453	4.99279	25.0139	58.1438	23.4313	44.576	0	0	0	73.7243	12.1437	32.3188	34.6347	304.509	255.968	218.567	137.451	104.146	144.44	202.468	203.666	84.6522	111.153	213.481	295.366	163.727	242.425	286.859	349.92	112.123	6.27115	27.0584	85.9649	16.5794	254.955
MTA_Mm-int_dup2295	48.8274	-1.76522	0.472879	-3.73291	0.000189279	0.00339182	Down	MTA_Mm-int	ERVL-MaLR	LTR	MTA_Mm-int:ERVL-MaLR:LTR	NA	2cWT-2cKO:8cKO-2cKO	54.8418	18.9189	10.8177	27.7932	7.9287	17.5735	11.144	21.0216	17.3246	0	0	36.4311	32.3188	92.3593	135.459	73.4459	90.5963	47.15	60.173	66.3138	18.4734	63.6274	58.0541	67.2892	80.966	116.365	114.445	52.5518	131.477	31.3722	80.5247	12.5423	9.47045	88.0117	8.68443	37.3935
MTA_Mm-int_dup2340	133.597	-1.51517	0.522755	-2.89843	0.0037503	0.0348804	Down	MTA_Mm-int	ERVL-MaLR	LTR	MTA_Mm-int:ERVL-MaLR:LTR	NA	2cWT-2cKO:8cKO-2cKO	172.693	25.5661	53.2565	16.6759	7.9287	195.651	44.576	42.0432	25.9869	43.6697	36.8621	48.5748	113.116	11.5449	288.508	210.829	272.522	442.452	118.957	164.887	149.019	186.234	175.013	213.816	177.061	373.77	221.497	248.869	152.455	19.3059	152.895	66.2951	28.4114	5.11696	101.055	88.3845
MTA_Mm-int_dup2364	15.7936	-1.67919	0.58062	-2.89207	0.00382713	0.0353371	Down	MTA_Mm-int	ERVL-MaLR	LTR	MTA_Mm-int:ERVL-MaLR:LTR	NA	2cWT-2cKO:8cKO-2cKO	14.0022	3.57925	0.832132	11.1173	10.5716	9.37251	0	63.0648	0	0	0	595.041	0	11.5449	322.342	17.1592	15.6643	60.6214	12.5901	30.7392	37.6857	17.1416	16.0317	20.7527	17.9302	19.5645	57.2223	24.1996	16.831	4.82649	5.0965	6.27115	101.469	2.04678	0.789493	37.3935
MTA_Mm-int_dup2365	203.968	-1.97448	0.459952	-4.29279	1.76442e-05	0.000423841	Down	MTA_Mm-int	ERVL-MaLR	LTR	MTA_Mm-int:ERVL-MaLR:LTR	NA	2cWT-2cKO:8cKO-2cKO	158.691	46.0189	80.7168	241.801	21.1432	17.5735	33.432	31.5324	34.6492	174.679	110.586	36.4311	48.4783	80.8144	498.598	366.574	321.164	371.938	325.675	332.053	324.639	365.785	220.679	295.098	386.199	594.09	395.354	242.998	480.538	144.795	130.47	348.497	119.057	33.7719	31.5797	13.5976
MTA_Mm-int_dup2380	23.5679	-2.7169	0.891037	-3.04915	0.00229493	0.0244246	Down	MTA_Mm-int	ERVL-MaLR	LTR	MTA_Mm-int:ERVL-MaLR:LTR	NA	2cWT-2cKO	7.00108	9.7151	12.482	0	0	2.34313	0	0	25.9869	0	36.8621	12.1437	0	0	31.2692	33.9906	47.2677	14.7344	29.3459	17.4074	31.7742	97.6201	12.0238	59.5069	57.4326	42.7791	2.73791	33.5071	42.6874	9.65297	132.509	0	0	40.9357	0.789493	0
MTA_Mm-int_dup2388	235.474	-2.25651	0.460718	-4.89781	9.691e-07	3.04809e-05	Down	MTA_Mm-int	ERVL-MaLR	LTR	MTA_Mm-int:ERVL-MaLR:LTR	NA	2cWT-2cKO:8cWT-8cKO	175.027	15.851	19.139	47.2484	50.2151	167.534	44.576	21.0216	77.9606	131.009	147.449	121.437	145.435	23.0898	446.808	399.909	395.638	425.402	319.473	357.818	321.191	546.789	186.672	235.198	323.584	594.09	507.609	273.498	350.525	217.192	171.242	206.052	227.291	103.363	42.6326	84.9851
MTA_Mm-int_dup2404	150.508	-1.42501	0.366206	-3.89127	9.97198e-05	0.00196663	Down	MTA_Mm-int	ERVL-MaLR	LTR	MTA_Mm-int:ERVL-MaLR:LTR	NA	2cWT-2cKO:8cWT-8cKO	26.8375	97.151	28.2925	208.449	84.5728	41.0047	66.864	31.5324	77.9606	131.009	73.7243	0	145.435	34.6347	241.848	227.988	204.46	262.693	213.105	207.162	202.222	249.861	96.9188	184.652	208.579	305.878	354.012	111.547	131.233	125.489	134.548	151.404	254.349	81.8714	99.4762	316.145
MTA_Mm-int_dup2406	29.6543	-1.99624	0.640205	-3.11813	0.00182004	0.0206905	Down	MTA_Mm-int	ERVL-MaLR	LTR	MTA_Mm-int:ERVL-MaLR:LTR	NA	2cWT-2cKO	36.1722	2.55661	4.16066	13.8966	0	8.20095	33.432	31.5324	17.3246	43.6697	0	12.1437	16.1594	11.5449	49.5911	20.2195	36.4584	46.5185	26.5687	39.6501	55.6665	59.5599	11.7809	43.1563	15.6889	77.82	47.0921	81.1903	39.0285	9.65297	70.3317	16.1258	98.7633	7.16374	0.789493	13.5976
MTA_Mm-int_dup2430	6.21203	-2.00359	0.715661	-2.79963	0.00511611	0.0439229	Down	MTA_Mm-int	ERVL-MaLR	LTR	MTA_Mm-int:ERVL-MaLR:LTR	NA	2cWT-2cKO:8cKO-2cKO	2.33369	1.02264	0.832132	8.33796	0	4.68626	0	10.5108	0	0	0	0	32.3188	0	11.8481	42.297	7.96955	3.57835	4.07325	5.87154	31.0353	12.7836	4.49373	4.08766	3.08175	9.92826	4.10687	4.86855	3.90285	0	2.0386	2.68764	2.70584	3.07018	0.789493	0
MTA_Mm-int_dup2436	10.553	-1.78154	0.59175	-3.01063	0.00260706	0.026788	Down	MTA_Mm-int	ERVL-MaLR	LTR	MTA_Mm-int:ERVL-MaLR:LTR	NA	2cWT-2cKO:8cKO-2cKO	7.00108	8.69246	0.832132	0	2.6429	10.5441	0	10.5108	8.66229	0	0	0	16.1594	11.5449	13.5581	30.4932	11.5421	61.4634	11.2014	7.04584	7.14305	34.2833	3.27921	13.5207	19.8913	17.3745	25.7364	7.8756	12.9282	7.23973	4.0772	2.68764	13.5292	2.04678	2.36848	0
MTA_Mm-int_dup2451	42.5379	-3.08768	0.779415	-3.96153	7.4471e-05	0.00153483	Down	MTA_Mm-int	ERVL-MaLR	LTR	MTA_Mm-int:ERVL-MaLR:LTR	NA	2cWT-2cKO	14.0022	3.06793	9.15346	0	0	3.51469	11.144	0	51.9738	43.6697	36.8621	12.1437	0	23.0898	56.4312	41.5319	78.0466	38.9408	41.1954	47.7321	19.705	58.9788	36.8	44.021	14.7084	63.8037	47.0921	49.1151	34.8817	427.144	170.223	24.1887	1.35292	2.04678	5.52645	6.79881
MTA_Mm-int_dup2455	339.628	-2.52652	0.552939	-4.56926	4.8944e-06	0.000135434	Down	MTA_Mm-int	ERVL-MaLR	LTR	MTA_Mm-int:ERVL-MaLR:LTR	NA	2cWT-2cKO	21.0032	30.1679	12.482	202.89	206.146	57.4066	22.288	63.0648	580.374	131.009	221.173	72.8622	113.116	357.892	619.277	344.168	578.479	503.915	477.959	384.068	620.952	554.924	239.625	453.102	260.268	599.2	792.078	506.902	592.257	190.646	184.493	206.948	523.581	71.6374	120.792	122.379
MTA_Mm-int_dup2477	6.35129	-3.23307	0.78485	-4.11935	3.79946e-05	0.00084135	Down	MTA_Mm-int	ERVL-MaLR	LTR	MTA_Mm-int:ERVL-MaLR:LTR	NA	2cWT-2cKO:8cKO-2cKO	3.50054	0.511321	0.832132	2.77932	0	1.17156	11.144	0	0	0	0	0	0	11.5449	24.5512	28.4166	18.4124	5.68326	27.0316	8.77277	28.8185	4.35804	1.82178	5.10958	5.88334	7.88421	13.9633	7.8756	4.63463	0	0	0.895879	0	1.02339	1.57899	6.79881
MTA_Mm-int_dup2480	12.4556	-3.98337	1.17668	-3.38528	0.000711069	0.0100405	Down	MTA_Mm-int	ERVL-MaLR	LTR	MTA_Mm-int:ERVL-MaLR:LTR	NA	2cWT-2cKO	7.00108	0.511321	0	0	0	1.17156	0	0	0	0	0	12.1437	0	0	13.3139	29.1816	18.6872	4.42031	27.6796	33.3641	86.2092	27.0199	4.12937	53.7685	7.98454	48.0353	2.19033	4.0094	2.43928	41.0251	35.6755	0.895879	0	0	0	0
MTA_Mm-int_dup2506	20.1218	-2.31301	0.809618	-2.85692	0.0042778	0.0385412	Down	MTA_Mm-int	ERVL-MaLR	LTR	MTA_Mm-int:ERVL-MaLR:LTR	NA	2cWT-2cKO	3.50054	5.11321	1.66426	22.2346	2.6429	4.68626	0	0	0	0	0	12.1437	32.3188	0	23.2076	40.3297	33.1606	27.1533	4.44355	14.9897	16.9955	35.7359	34.2495	17.1367	19.1909	43.8011	43.5328	76.0354	36.8331	147.208	1.0193	1.79176	35.176	2.04678	1.57899	0
MTA_Mm-int_dup2514	278.573	-3.27975	0.437774	-7.49188	6.78958e-14	8.24356e-12	Down	MTA_Mm-int	ERVL-MaLR	LTR	MTA_Mm-int:ERVL-MaLR:LTR	NA	2cWT-2cKO:8cWT-8cKO:8cKO-2cKO	21.0032	32.7245	95.6952	50.0278	15.8574	86.6957	33.432	31.5324	112.61	0	110.586	182.155	193.913	46.1796	660.318	356.3	544.036	285.426	319.75	439.951	450.505	834.419	373.587	387.385	443.632	845.654	619.315	355.548	479.807	475.409	11.2123	314.454	227.291	101.316	196.584	316.145
MTA_Mm-int_dup2520	30.4446	-1.54877	0.527592	-2.93555	0.00332953	0.0319492	Down	MTA_Mm-int	ERVL-MaLR	LTR	MTA_Mm-int:ERVL-MaLR:LTR	NA	2cWT-2cKO	15.169	12.2717	5.82493	19.4552	26.429	14.0588	11.144	10.5108	34.6492	43.6697	36.8621	24.2874	0	11.5449	51.7897	21.0938	76.4893	53.0437	24.0692	46.2815	92.8596	27.6009	47.3663	18.3945	43.5648	80.1561	37.2356	21.4789	19.0264	31.3722	4.0772	2.68764	55.4698	10.2339	5.52645	81.5857
MTA_Mm-int_dup2524	1.54261	-3.82127	1.3059	-2.92615	0.00343183	0.0327547	Down	MTA_Mm-int	ERVL-MaLR	LTR	MTA_Mm-int:ERVL-MaLR:LTR	NA	2cWT-2cKO	0	0	0	0	0	0	0	0	0	0	0	0	0	0	1.3436	7.21344	0.824436	0.420982	0.648017	1.24338	0.985248	2.61482	0.607261	5.81706	0.14008	19.8565	2.19033	0.143193	5.61035	0	1.0193	5.37527	0	1.02339	0	0
MTA_Mm-int_dup2558	5.44176	-3.67132	1.05215	-3.48935	0.000484191	0.00732981	Down	MTA_Mm-int	ERVL-MaLR	LTR	MTA_Mm-int:ERVL-MaLR:LTR	NA	2cWT-2cKO	1.16685	0.511321	0.832132	0	0	1.17156	11.144	0	0	0	0	12.1437	0	0	19.0547	9.50862	16.7635	7.78817	17.1262	2.97031	6.65042	13.3647	15.303	8.17532	0.700398	3.50409	14.5109	8.87795	0.731784	7.23973	0	0	0	0	22.1058	0
MTA_Mm-int_dup2565	51.5296	-1.79393	0.446457	-4.01814	5.86601e-05	0.00124936	Down	MTA_Mm-int	ERVL-MaLR	LTR	MTA_Mm-int:ERVL-MaLR:LTR	NA	2cWT-2cKO	24.5038	27.1	14.1462	22.2346	29.0719	18.745	44.576	42.0432	0	0	73.7243	0	0	23.0898	125.199	56.5052	68.4282	97.0363	55.5443	33.6405	81.0366	117.086	63.8838	60.9219	133.636	79.5721	92.2676	54.1269	51.7128	190.646	24.4632	84.2126	16.2351	47.076	14.2109	16.997
MTA_Mm-int_dup2576	48.8448	-2.15479	0.732316	-2.94244	0.00325641	0.0314334	Down	MTA_Mm-int	ERVL-MaLR	LTR	MTA_Mm-int:ERVL-MaLR:LTR	NA	2cWT-2cKO	39.6728	2.55661	2.4964	27.7932	15.8574	24.6028	11.144	31.5324	0	0	0	0	32.3188	0	185.783	99.5673	91.5124	12.6295	34.3449	83.0304	139.905	62.4652	55.6251	46.9295	38.5219	180.315	98.0172	52.9813	61.9577	159.274	5.0965	159.466	4.05877	5.11696	1.57899	13.5976
MTA_Mm-int_dup2625	153.118	-2.06257	0.656049	-3.14392	0.00166699	0.0192448	Down	MTA_Mm-int	ERVL-MaLR	LTR	MTA_Mm-int:ERVL-MaLR:LTR	NA	2cWT-2cKO	52.5081	16.8736	17.4748	30.5725	10.5716	154.646	100.296	10.5108	51.9738	174.679	147.449	655.759	16.1594	34.6347	229.878	251.268	284.339	269.639	124.975	159.637	166.507	284.725	89.3888	153.13	153.807	226.014	232.996	163.956	173.433	596.071	95.8142	43.0022	119.057	147.368	8.68443	217.562
MTA_Mm-int_dup2628	10.0264	-3.05321	0.774135	-3.94403	8.01229e-05	0.00162504	Down	MTA_Mm-int	ERVL-MaLR	LTR	MTA_Mm-int:ERVL-MaLR:LTR	NA	2cWT-2cKO:8cKO-2cKO	4.66739	1.02264	0.832132	5.55864	5.2858	0	0	0	0	0	0	0	16.1594	0	3.17578	7.10414	12.3665	10.1036	9.81283	8.35831	51.7255	83.3838	19.1894	14.3854	7.98454	33.1429	16.4275	24.3428	9.26927	0	2.0386	5.37527	0	2.04678	12.6319	0
MTA_Mm-int_dup266	227.19	-1.75629	0.342772	-5.1238	2.99432e-07	1.03974e-05	Down	MTA_Mm-int	ERVL-MaLR	LTR	MTA_Mm-int:ERVL-MaLR:LTR	NA	2cWT-2cKO:8cKO-2cKO	142.355	96.6397	54.0886	125.069	66.0725	118.328	66.864	94.5972	103.948	131.009	331.759	109.293	80.7971	161.629	608.04	306.462	267.575	263.324	271.149	323.142	226.607	538.654	159.71	227.337	268.112	600.806	510.894	325.62	189.288	287.176	112.123	355.664	321.995	137.135	53.6856	98.5828
MTA_Mm-int_dup2662	3.16432	-2.93088	0.919636	-3.187	0.00143756	0.0172759	Down	MTA_Mm-int	ERVL-MaLR	LTR	MTA_Mm-int:ERVL-MaLR:LTR	NA	2cWT-2cKO:8cKO-2cKO	2.33369	1.02264	0	0	0	1.17156	0	0	0	0	0	0	0	0	8.18375	3.49742	4.76341	15.3658	1.66633	2.34861	5.17255	37.1886	2.18614	9.35446	1.96111	1.89805	3.28549	2.72066	4.14678	0	1.0193	1.79176	0	78.8012	1.57899	3.39941
MTA_Mm-int_dup2672	194.708	-1.69509	0.430194	-3.94029	8.13839e-05	0.00164315	Down	MTA_Mm-int	ERVL-MaLR	LTR	MTA_Mm-int:ERVL-MaLR:LTR	NA	2cWT-2cKO:8cKO-2cKO	102.682	88.4585	15.8105	147.304	132.145	57.4066	0	105.108	25.9869	87.3395	184.311	48.5748	468.623	138.539	297.791	320.889	312.278	370.675	324.379	220.77	210.597	293.441	172.341	257.365	200.454	474.366	501.859	239.275	164.651	289.589	259.921	161.258	144.763	69.5907	58.4225	156.373
MTA_Mm-int_dup2676	30.5149	-1.30445	0.369997	-3.52557	0.000422576	0.00659854	Down	MTA_Mm-int	ERVL-MaLR	LTR	MTA_Mm-int:ERVL-MaLR:LTR	NA	2cWT-2cKO:8cKO-2cKO	42.0065	24.5434	16.6426	22.2346	5.2858	14.0588	0	0	17.3246	0	0	24.2874	32.3188	23.0898	58.2634	64.1559	73.8328	45.0451	40.0845	32.8806	53.2034	66.2422	28.2984	56.4412	21.0119	81.0321	42.1638	87.2044	39.2724	19.3059	12.2316	24.1887	6.76461	22.5146	2.36848	16.997
MTA_Mm-int_dup2690	54.6721	-3.08639	0.454708	-6.78764	1.13982e-11	9.00159e-10	Down	MTA_Mm-int	ERVL-MaLR	LTR	MTA_Mm-int:ERVL-MaLR:LTR	NA	2cWT-2cKO:8cKO-2cKO	10.5016	14.8283	2.4964	30.5725	0	15.2303	0	10.5108	34.6492	0	0	12.1437	16.1594	935.138	192.623	93.1189	73.558	59.9899	45.4538	100.162	99.2637	168.22	65.2198	84.2687	92.5926	143.814	119.373	91.9298	91.9609	9.65297	60.1387	48.3775	71.7049	11.2573	33.1587	64.5887
MTA_Mm-int_dup2698	102.65	-2.84048	0.61045	-4.65309	3.27002e-06	9.3558e-05	Down	MTA_Mm-int	ERVL-MaLR	LTR	MTA_Mm-int:ERVL-MaLR:LTR	NA	2cWT-2cKO:8cKO-2cKO	37.3391	20.9642	4.99279	13.8966	52.858	29.2891	0	42.0432	34.6492	43.6697	110.586	48.5748	16.1594	11.5449	210.945	148.313	237.804	155.974	189.406	257.45	63.0559	138.586	90.7248	164.135	162.352	396.254	263.113	130.019	219.535	14.4795	7.1351	5.37527	160.998	13.3041	78.1598	224.361
MTA_Mm-int_dup2702	18.4904	-2.81147	0.671452	-4.18715	2.82479e-05	0.000646174	Down	MTA_Mm-int	ERVL-MaLR	LTR	MTA_Mm-int:ERVL-MaLR:LTR	8cWT-8cKO:8cWT-2cWT	2cWT-2cKO:8cKO-2cKO	11.6685	2.55661	0.832132	2.77932	2.6429	2.34313	11.144	10.5108	8.66229	0	36.8621	0	0	184.719	46.0488	40.6575	19.2368	21.0491	36.289	15.266	33.4984	18.5943	47.2449	11.1625	2.52143	14.7464	42.1638	27.0634	26.5882	0	0	0.895879	0	1.02339	0.789493	0
MTA_Mm-int_dup2709	105.339	-3.6311	0.481417	-7.54252	4.60978e-14	5.75352e-12	Down	MTA_Mm-int	ERVL-MaLR	LTR	MTA_Mm-int:ERVL-MaLR:LTR	8cWT-2cWT	2cWT-2cKO:8cKO-2cKO	8.16793	43.9736	4.99279	13.8966	7.9287	8.20095	11.144	42.0432	95.2852	131.009	36.8621	12.1437	48.4783	11.5449	245.268	167.002	185.681	194.494	121.55	106.793	220.942	242.017	111.007	160.048	146.944	309.674	251.888	213.357	140.015	7.23973	119.258	187.239	25.7055	23.538	58.4225	64.5887
MTA_Mm-int_dup2719	287.924	-2.58002	0.476447	-5.41512	6.1249e-08	2.46766e-06	Down	MTA_Mm-int	ERVL-MaLR	LTR	MTA_Mm-int:ERVL-MaLR:LTR	NA	2cWT-2cKO:8cWT-8cKO	84.013	19.4302	148.952	144.525	7.9287	49.2057	89.152	73.5756	77.9606	131.009	368.621	72.8622	129.275	23.0898	471.604	408.761	514.265	488.76	335.58	446.444	520.703	808.271	270.96	364.274	305.514	702.278	463.255	293.259	384.187	265.457	141.683	149.612	381.524	155.556	22.1058	826.056
MTA_Mm-int_dup277	104.058	-3.40696	0.537977	-6.3329	2.40591e-10	1.47057e-08	Down	MTA_Mm-int	ERVL-MaLR	LTR	MTA_Mm-int:ERVL-MaLR:LTR	NA	2cWT-2cKO:8cWT-8cKO	38.5059	12.2717	5.82493	2.77932	18.5003	8.20095	11.144	10.5108	25.9869	87.3395	0	12.1437	16.1594	0	217.541	182.85	156.551	206.071	121.92	134.907	147.787	260.611	113.801	62.7299	70.0398	144.982	153.597	200.613	128.062	19.3059	42.8106	176.488	347.701	111.55	118.424	10.1982
MTA_Mm-int_dup2841	168.928	-1.38051	0.41096	-3.35923	0.000781587	0.0107554	Down	MTA_Mm-int	ERVL-MaLR	LTR	MTA_Mm-int:ERVL-MaLR:LTR	NA	2cWT-2cKO:8cWT-8cKO	79.3456	19.9415	41.6066	111.173	253.719	66.7792	33.432	63.0648	17.3246	43.6697	36.8621	72.8622	48.4783	34.6347	348.97	307.555	255.117	137.451	213.475	162.331	206.409	309.711	142.949	241.015	208.999	461.518	310.479	137.608	219.779	205.126	77.4668	289.369	20.2938	206.725	217.111	363.736
MTA_Mm-int_dup288	18.7999	-2.1992	0.774572	-2.83925	0.00452198	0.0401734	Down	MTA_Mm-int	ERVL-MaLR	LTR	MTA_Mm-int:ERVL-MaLR:LTR	NA	2cWT-2cKO	1.16685	24.5434	2.4964	0	2.6429	1.17156	11.144	0	8.66229	0	36.8621	12.1437	0	0	38.9644	26.5586	15.7559	32.8366	26.5687	26.94	47.5382	25.5672	8.13729	11.0052	32.9187	25.9887	28.7481	5.15494	52.4445	2.41324	21.4053	46.5857	1.35292	109.503	1.57899	6.79881
MTA_Mm-int_dup2880	8.77458	-3.96367	1.18396	-3.34781	0.00081453	0.0110806	Down	MTA_Mm-int	ERVL-MaLR	LTR	MTA_Mm-int:ERVL-MaLR:LTR	NA	2cWT-2cKO	0	2.04528	0	0	2.6429	1.17156	22.288	10.5108	0	0	0	0	0	0	4.0308	36.5044	17.2216	0.210491	19.2554	20.3086	0.492624	53.7492	11.2951	2.35827	18.7707	17.6665	3.55928	12.8874	9.75712	0	48.9264	0	0	1.02339	0	3.39941
MTA_Mm-int_dup2890	13.7176	-3.21049	0.808879	-3.96906	7.2156e-05	0.00148883	Down	MTA_Mm-int	ERVL-MaLR	LTR	MTA_Mm-int:ERVL-MaLR:LTR	NA	2cWT-2cKO	3.50054	6.64717	0	0	2.6429	2.34313	0	0	17.3246	0	0	0	16.1594	0	16.1232	11.6945	47.5425	24.2065	47.3053	17.8909	13.3008	17.7227	19.3109	18.08	48.1874	28.7628	5.74961	17.4695	48.2978	4.82649	1.0193	61.8157	0	3.07018	3.15797	3.39941
MTA_Mm-int_dup2891	230.912	-2.59719	0.483585	-5.3707	7.84305e-08	3.07654e-06	Down	MTA_Mm-int	ERVL-MaLR	LTR	MTA_Mm-int:ERVL-MaLR:LTR	8cWT-2cWT	2cWT-2cKO	18.6695	43.9736	31.621	113.952	21.1432	99.583	178.304	21.0216	60.636	1135.41	73.7243	109.293	48.4783	69.2694	422.99	333.348	441.165	416.141	244.025	262.078	347.546	359.974	247.762	331.179	198.633	506.925	363.321	223.381	243.928	200.299	37.7141	328.788	370.701	137.135	215.532	139.376
MTA_Mm-int_dup2893	262.532	-1.83548	0.513021	-3.57779	0.000346508	0.00560188	Down	MTA_Mm-int	ERVL-MaLR	LTR	MTA_Mm-int:ERVL-MaLR:LTR	NA	2cWT-2cKO	92.1809	115.047	17.4748	314.063	15.8574	44.5194	22.288	52.554	355.154	393.028	331.759	24.2874	210.073	46.1796	440.457	222.414	287.545	408.142	116.18	300.139	894.605	501.756	287.477	334.481	251.723	433.631	262.839	299.702	266.369	241.324	222.207	179.176	419.406	301.901	59.212	540.506
MTA_Mm-int_dup2897	3.78565	-2.90337	0.862236	-3.36726	0.000759184	0.0105529	Down	MTA_Mm-int	ERVL-MaLR	LTR	MTA_Mm-int:ERVL-MaLR:LTR	NA	2cWT-2cKO:8cKO-2cKO	3.50054	1.02264	0	0	0	0	0	0	0	0	0	12.1437	0	11.5449	3.66436	1.20224	6.50388	1.26295	10.7386	5.80246	1.47787	7.2634	3.76502	8.80419	17.2298	9.49025	11.773	7.15964	4.87856	0	1.0193	0.895879	0	0	5.52645	3.39941
MTA_Mm-int_dup2924	11.986	-3.03984	0.912513	-3.33128	0.000864462	0.011592	Down	MTA_Mm-int	ERVL-MaLR	LTR	MTA_Mm-int:ERVL-MaLR:LTR	NA	2cWT-2cKO	0	1.02264	1.66426	13.8966	0	0	0	10.5108	0	43.6697	36.8621	0	0	0	20.154	23.0611	33.4355	20.4176	35.0855	5.31892	5.66517	2.32429	21.7399	20.0453	8.2647	9.63625	47.9134	25.4883	0.975712	16.8927	2.0386	0.895879	0	5.11696	0.789493	30.5947
MTA_Mm-int_dup2933	175.436	-1.85311	0.385162	-4.81125	1.49993e-06	4.56061e-05	Down	MTA_Mm-int	ERVL-MaLR	LTR	MTA_Mm-int:ERVL-MaLR:LTR	NA	2cWT-2cKO:8cKO-2cKO	126.019	102.264	64.9063	91.7176	37.0006	62.0929	234.024	157.662	147.259	0	184.311	36.4311	48.4783	46.1796	312.692	261.87	332.981	296.371	198.941	243.911	238.43	284.144	224.808	236.22	258.307	514.955	377.832	355.404	254.417	31.3722	66.2545	176.488	29.7643	18.4211	71.8439	248.157
MTA_Mm-int_dup296	16.7838	-1.97682	0.645404	-3.06292	0.0021919	0.0237818	Down	MTA_Mm-int	ERVL-MaLR	LTR	MTA_Mm-int:ERVL-MaLR:LTR	NA	2cWT-2cKO:8cKO-2cKO	39.6728	6.64717	0.832132	2.77932	0	1.17156	0	515.029	8.66229	0	0	0	0	11.5449	32.8571	20.6567	43.3287	37.0464	32.6786	27.2854	36.2079	8.13501	8.13729	30.4216	57.7128	40.1511	84.8752	36.6574	25.6125	0	3.0579	1.79176	0	0	2.36848	10.1982
MTA_Mm-int_dup2963	1.99888	-3.02084	1.07663	-2.80583	0.00501866	0.0433558	Down	MTA_Mm-int	ERVL-MaLR	LTR	MTA_Mm-int:ERVL-MaLR:LTR	8cWT-2cWT	2cWT-2cKO	0	0.511321	0	0	0	0	0	0	0	0	0	12.1437	0	0	3.54222	0.765061	3.93897	1.89442	2.4995	1.796	2.21681	0.290536	0.728713	4.32349	0.420239	4.96413	4.38066	4.0094	3.41499	0	0	2.68764	0	0	12.6319	6.79881
MTA_Mm-int_dup297	2.63903	-3.94185	1.26243	-3.12243	0.00179367	0.0204515	Down	MTA_Mm-int	ERVL-MaLR	LTR	MTA_Mm-int:ERVL-MaLR:LTR	8cWT-2cWT	2cWT-2cKO	0	0	0	0	0	0	0	0	0	0	0	0	16.1594	0	0.732873	0.546472	9.61842	5.26227	0.740591	0.414461	1.47787	13.3647	0.364356	7.31062	3.92223	1.16803	7.39236	0.715964	1.21964	0	0	0	0	7.16374	6.31595	0
MTA_Mm-int_dup2994	132.748	-1.95252	0.623198	-3.13306	0.00172995	0.0198432	Down	MTA_Mm-int	ERVL-MaLR	LTR	MTA_Mm-int:ERVL-MaLR:LTR	NA	2cWT-2cKO:8cKO-2cKO	96.8483	151.351	5.82493	38.9105	26.429	31.6322	11.144	10.5108	25.9869	43.6697	36.8621	182.155	32.3188	46.1796	551.853	78.5827	359.546	79.3551	219.215	145.752	146.556	307.678	135.176	302.566	165.854	354.935	262.018	213.214	98.7909	31.3722	17.3281	9.85467	129.88	22.5146	173.689	356.938
MTA_Mm-int_dup308	258.496	-3.66912	0.553588	-6.62789	3.40519e-11	2.40221e-09	Down	MTA_Mm-int	ERVL-MaLR	LTR	MTA_Mm-int:ERVL-MaLR:LTR	8cWT-2cWT	2cWT-2cKO:8cKO-2cKO	28.0043	30.1679	27.4604	44.4691	10.5716	29.2891	11.144	1366.4	355.154	218.349	294.897	60.7185	549.42	11.5449	466.718	307.664	366.141	410.668	259.3	324.316	423.41	322.204	159.224	391.708	280.579	593.944	376.463	293.259	431.997	185.82	15.2895	147.82	284.114	189.328	144.477	10.1982
MTA_Mm-int_dup343	63.3968	-1.87291	0.596085	-3.14202	0.00167789	0.0193581	Down	MTA_Mm-int	ERVL-MaLR	LTR	MTA_Mm-int:ERVL-MaLR:LTR	NA	2cWT-2cKO:8cKO-2cKO	10.5016	129.364	4.99279	19.4552	2.6429	14.0588	22.288	31.5324	8.66229	0	0	24.2874	0	0	131.673	108.311	109.467	93.6685	111.366	70.044	83.9924	193.497	56.9611	89.2997	82.5069	270.837	145.383	109.542	47.0781	53.0913	2.0386	66.2951	44.6464	6.14035	62.37	112.18
MTA_Mm-int_dup355	101.625	-1.15826	0.412463	-2.80816	0.00498255	0.0431274	Down	MTA_Mm-int	ERVL-MaLR	LTR	MTA_Mm-int:ERVL-MaLR:LTR	NA	2cWT-2cKO:8cKO-2cKO	94.5146	23.0094	55.7529	16.6759	23.7861	212.053	22.288	42.0432	60.636	43.6697	36.8621	157.868	0	34.6347	172.714	185.254	144.918	194.915	140.99	182.018	125.126	254.51	123.152	134.814	148.484	175.789	157.704	106.392	153.919	77.2238	44.8492	115.568	79.8224	53.2164	17.3689	23.7958
MTA_Mm-int_dup363	124.367	-1.98759	0.615587	-3.22878	0.00124321	0.015495	Down	MTA_Mm-int	ERVL-MaLR	LTR	MTA_Mm-int:ERVL-MaLR:LTR	NA	2cWT-2cKO:8cKO-2cKO	61.8429	13.2943	9.15346	86.1589	50.2151	87.8673	33.432	31.5324	34.6492	0	147.449	0	307.029	103.904	221.572	168.751	300.186	246.485	144.971	255.101	146.556	268.746	61.2119	159.026	129.153	363.988	283.374	129.017	157.821	21.7192	24.4632	215.011	188.056	4.09357	19.7373	6.79881
MTA_Mm-int_dup369	53.6408	-2.34556	0.539682	-4.3462	1.38518e-05	0.000343849	Down	MTA_Mm-int	ERVL-MaLR	LTR	MTA_Mm-int:ERVL-MaLR:LTR	NA	2cWT-2cKO:8cKO-2cKO	31.5049	11.2491	17.4748	22.2346	15.8574	18.745	89.152	10.5108	34.6492	0	73.7243	12.1437	16.1594	0	84.2804	92.6817	166.902	93.6685	111.922	48.9755	86.9481	76.411	77.1221	88.5136	61.4949	184.111	116.909	104.101	87.3263	0	5.0965	94.0673	9.47045	26.6082	5.52645	0
MTA_Mm-int_dup37	12.5936	-1.3216	0.479995	-2.75336	0.00589874	0.048408	Down	MTA_Mm-int	ERVL-MaLR	LTR	MTA_Mm-int:ERVL-MaLR:LTR	NA	2cWT-2cKO	12.8353	6.64717	4.99279	8.33796	7.9287	5.85782	22.288	0	0	0	0	12.1437	16.1594	0	34.2007	31.5861	17.8628	10.735	21.94	13.8154	13.7935	7.84447	12.2667	7.31062	19.8913	43.6551	22.4509	9.8803	19.0264	4.82649	14.2702	0.895879	24.3526	20.4678	6.31595	6.79881
MTA_Mm-int_dup38	5.66351	-2.62959	0.870929	-3.01929	0.00253369	0.0262456	Down	MTA_Mm-int	ERVL-MaLR	LTR	MTA_Mm-int:ERVL-MaLR:LTR	NA	2cWT-2cKO:8cKO-2cKO	2.33369	0.511321	3.32853	0	5.2858	0	11.144	0	233.882	0	0	0	0	0	4.0308	20.5474	10.7177	12.8399	6.48017	9.73984	5.17255	7.55394	47.9736	11.4769	8.2647	4.23411	8.21373	0.286386	9.02534	4.82649	1.0193	0	0	0	0.789493	0
MTA_Mm-int_dup391	109.492	-1.0938	0.373522	-2.92835	0.00340769	0.032594	Down	MTA_Mm-int	ERVL-MaLR	LTR	MTA_Mm-int:ERVL-MaLR:LTR	NA	2cWT-2cKO:8cKO-2cKO	158.691	81.3001	76.5562	38.9105	55.5009	43.3479	156.016	42.0432	25.9869	131.009	73.7243	24.2874	16.1594	57.7245	193.112	194.544	168.551	229.856	121.272	166.268	233.996	142.072	144.042	119.8	123.55	249.375	103.493	109.399	146.357	241.324	27.5211	59.128	82.5282	97.2222	60.791	37.3935
MTA_Mm-int_dup405	66.4759	-1.94689	0.70172	-2.77445	0.00552946	0.0463333	Down	MTA_Mm-int	ERVL-MaLR	LTR	MTA_Mm-int:ERVL-MaLR:LTR	NA	2cWT-2cKO:8cWT-8cKO	11.6685	100.73	15.8105	2.77932	2.6429	7.02939	22.288	10.5108	8.66229	43.6697	73.7243	12.1437	16.1594	0	130.329	80.0036	74.016	71.1459	69.6156	70.942	138.181	156.889	110.036	80.181	61.9152	111.693	130.872	36.371	77.3252	9.65297	18.3474	97.6508	183.997	26.6082	6.31595	0
MTA_Mm-int_dup406	51.7223	-1.60412	0.535766	-2.99408	0.00275275	0.0279154	Down	MTA_Mm-int	ERVL-MaLR	LTR	MTA_Mm-int:ERVL-MaLR:LTR	NA	2cWT-2cKO:8cKO-2cKO	50.1744	12.783	9.98559	22.2346	66.0725	10.5441	11.144	73.5756	25.9869	0	110.586	48.5748	0	23.0898	99.5485	44.3736	151.971	87.7747	52.2117	101.543	83.0071	130.741	22.1043	46.1434	31.2378	151.844	98.5648	76.7513	100.986	79.637	1.0193	32.2516	10.8234	5.11696	17.3689	10.1982
MTA_Mm-int_dup413	20.4471	-5.09864	1.05456	-4.83486	1.33239e-06	4.10008e-05	Down	MTA_Mm-int	ERVL-MaLR	LTR	MTA_Mm-int:ERVL-MaLR:LTR	8cWT-2cWT	2cWT-2cKO	0	1.53396	0	0	2.6429	1.17156	33.432	0	0	0	36.8621	24.2874	16.1594	0	35.5443	45.1386	14.1986	36.6254	6.10988	16.4403	37.4394	3.1959	31.2132	10.1405	69.8997	70.3738	53.3893	5.44133	8.29356	2.41324	29.5597	0.895879	70.3519	86.9883	0	6.79881
MTA_Mm-int_dup425	7.4161	-1.93951	0.540612	-3.58762	0.000333705	0.00542438	Down	MTA_Mm-int	ERVL-MaLR	LTR	MTA_Mm-int:ERVL-MaLR:LTR	NA	2cWT-2cKO	4.66739	4.09057	0.832132	5.55864	0	2.34313	0	31.5324	0	0	0	0	0	0	15.5125	16.0663	10.0764	8.20915	7.40591	9.11815	3.94099	24.1145	6.55842	10.848	8.40478	8.61423	8.21373	15.7512	17.3189	19.3059	6.1158	7.16703	4.05877	1.02339	1.57899	6.79881
MTA_Mm-int_dup541	85.3731	-1.97398	0.346956	-5.68941	1.27479e-08	5.91769e-07	Down	MTA_Mm-int	ERVL-MaLR	LTR	MTA_Mm-int:ERVL-MaLR:LTR	NA	2cWT-2cKO:8cKO-2cKO	25.6706	76.6982	18.3069	41.6898	7.9287	51.5488	11.144	42.0432	25.9869	43.6697	147.449	0	48.4783	11.5449	176.744	127.875	156.46	183.338	136.176	125.651	135.718	65.3706	112.1	134.736	138.399	242.074	176.869	130.305	192.215	475.409	63.1966	23.2929	17.588	51.1696	43.4221	71.3875
MTA_Mm-int_dup551	19.7983	-3.51064	0.658171	-5.33393	9.61095e-08	3.70385e-06	Down	MTA_Mm-int	ERVL-MaLR	LTR	MTA_Mm-int:ERVL-MaLR:LTR	NA	2cWT-2cKO:8cKO-2cKO	1.16685	5.62453	5.82493	2.77932	0	2.34313	0	0	0	0	36.8621	0	16.1594	0	22.5969	26.6679	54.6876	29.2582	49.1567	32.8806	26.1091	58.3977	34.6139	59.0353	3.78215	57.0875	62.1506	13.7465	36.1014	9.65297	6.1158	45.6898	2.70584	3.07018	23.6848	0
MTA_Mm-int_dup553	54.6497	-3.63656	0.837798	-4.34062	1.42082e-05	0.000352205	Down	MTA_Mm-int	ERVL-MaLR	LTR	MTA_Mm-int:ERVL-MaLR:LTR	8cWT-2cWT	2cWT-2cKO	1.16685	8.69246	1.66426	19.4552	5.2858	3.51469	0	10.5108	138.597	43.6697	0	0	0	46.1796	117.137	106.671	89.4971	43.3611	119.328	62.2383	46.0603	101.688	37.6502	46.6937	51.2691	151.114	42.7114	63.4344	102.206	342.68	0	143.341	48.7052	16.3743	3.15797	3.39941
MTA_Mm-int_dup558	110.333	-3.50612	0.665666	-5.26708	1.38613e-07	5.1865e-06	Down	MTA_Mm-int	ERVL-MaLR	LTR	MTA_Mm-int:ERVL-MaLR:LTR	NA	2cWT-2cKO:8cWT-8cKO	8.16793	18.9189	2.4964	47.2484	18.5003	3.51469	0	21.0216	8.66229	131.009	110.586	0	16.1594	11.5449	162.698	163.177	199.513	217.016	183.111	187.82	140.644	299.543	64.734	239.364	181.823	285.291	192.475	85.7725	104.645	43.4384	14.2702	62.7115	12.1763	23.538	73.4229	696.878
MTA_Mm-int_dup584	258.467	-1.49251	0.490017	-3.04582	0.00232046	0.0246228	Down	MTA_Mm-int	ERVL-MaLR	LTR	MTA_Mm-int:ERVL-MaLR:LTR	NA	2cWT-2cKO	133.021	222.936	89.0382	191.773	63.4296	168.705	66.864	31.5324	69.2983	218.349	184.311	242.874	48.4783	57.7245	624.041	416.74	381.164	459.502	379.738	426.895	336.708	520.059	200.153	348.866	361.545	643.731	315.955	397.79	306.862	159.274	17.3281	331.475	340.936	7.16374	54.475	139.376
MTA_Mm-int_dup600	48.3675	-2.3903	0.631845	-3.78305	0.000154916	0.00286523	Down	MTA_Mm-int	ERVL-MaLR	LTR	MTA_Mm-int:ERVL-MaLR:LTR	NA	2cWT-2cKO:8cWT-8cKO	17.5027	17.8962	9.15346	8.33796	10.5716	21.0882	22.288	0	8.66229	0	0	12.1437	0	34.6347	83.3032	63.5001	82.0772	132.609	46.935	76.3991	78.8198	81.6406	39.9578	44.6498	68.2188	117.241	47.0921	95.9392	65.3727	301.655	1.0193	6.27115	32.4701	13.3041	129.477	10.1982
MTA_Mm-int_dup61	4.75157	-3.27401	0.790994	-4.13911	3.4865e-05	0.000780765	Down	MTA_Mm-int	ERVL-MaLR	LTR	MTA_Mm-int:ERVL-MaLR:LTR	NA	2cWT-2cKO:8cKO-2cKO	1.16685	2.55661	0	0	0	0	11.144	0	0	0	0	0	0	0	3.05364	8.08779	4.4886	6.10424	2.4995	9.11815	11.084	13.0741	10.4449	12.1844	16.3893	17.8125	6.29719	5.01175	11.2207	0	1.0193	1.79176	1.35292	1.02339	8.68443	10.1982
MTA_Mm-int_dup62	60.4009	-2.46218	0.613271	-4.01483	5.94885e-05	0.0012655	Down	MTA_Mm-int	ERVL-MaLR	LTR	MTA_Mm-int:ERVL-MaLR:LTR	NA	2cWT-2cKO	2.33369	44.9963	41.6066	11.1173	0	7.02939	22.288	21.0216	8.66229	43.6697	0	12.1437	16.1594	11.5449	146.33	129.842	109.558	152.185	77.1141	82.2015	71.6768	74.3772	62.305	86.3125	52.6699	173.745	181.523	50.5471	83.6673	26.5457	5.0965	14.3341	32.4701	39.9123	4.73696	261.754
MTA_Mm-int_dup628	26.3197	-3.66081	1.06124	-3.44956	0.000561498	0.00833052	Down	MTA_Mm-int	ERVL-MaLR	LTR	MTA_Mm-int:ERVL-MaLR:LTR	8cWT-2cWT	2cWT-2cKO	3.50054	9.7151	0	2.77932	0	0	0	0	17.3246	43.6697	0	194.299	0	0	47.1481	21.6403	63.0235	38.3094	29.9939	68.5934	26.3554	42.4183	45.9089	24.1329	27.8758	38.691	7.66615	6.73006	52.4445	2.41324	0	6.27115	5.41169	0	4.73696	142.775
MTA_Mm-int_dup640	133.282	-1.69372	0.581648	-2.91193	0.00359204	0.0337959	Down	MTA_Mm-int	ERVL-MaLR	LTR	MTA_Mm-int:ERVL-MaLR:LTR	NA	2cWT-2cKO	82.8461	82.834	14.1462	47.2484	5.2858	96.0683	378.896	31.5324	103.948	0	73.7243	36.4311	16.1594	0	243.436	153.231	241.102	162.078	116.18	182.156	139.905	146.14	95.3399	151.086	203.536	348.949	259.28	100.808	131.233	637.096	183.474	137.965	56.8227	64.4737	22.8953	47.5917
MTA_Mm-int_dup649	165.786	-2.34131	0.641079	-3.65214	0.000260066	0.00439135	Down	MTA_Mm-int	ERVL-MaLR	LTR	MTA_Mm-int:ERVL-MaLR:LTR	8cWT-2cWT	2cWT-2cKO	42.0065	43.4623	41.6066	38.9105	34.3577	57.4066	824.656	178.684	34.6492	349.358	184.311	36.4311	16.1594	46.1796	363.871	214.436	256.308	182.496	133.029	141.47	429.568	201.341	75.1789	125.617	148.765	390.122	251.066	110.974	247.831	364.4	8.1544	148.716	31.1172	19.4444	4.73696	329.742
MTA_Mm-int_dup678	98.0645	-1.92587	0.620347	-3.1045	0.00190601	0.0213459	Down	MTA_Mm-int	ERVL-MaLR	LTR	MTA_Mm-int:ERVL-MaLR:LTR	NA	2cWT-2cKO	29.1712	82.3227	31.621	25.0139	13.2145	28.1175	0	105.108	25.9869	43.6697	0	2695.9	48.4783	265.533	120.191	191.921	144.185	61.8843	96.2769	155.354	91.1354	142.072	127.403	96.7675	132.795	253.463	187.821	96.6551	117.817	19.3059	7.1351	350.289	1.35292	21.4912	108.161	234.559
MTA_Mm-int_dup686	40.7596	-2.29695	0.437397	-5.2514	1.50946e-07	5.58939e-06	Down	MTA_Mm-int	ERVL-MaLR	LTR	MTA_Mm-int:ERVL-MaLR:LTR	NA	2cWT-2cKO:8cKO-2cKO	31.5049	19.4302	25.7961	8.33796	0	5.85782	22.288	0	25.9869	0	0	12.1437	16.1594	34.6347	107.488	88.8564	36.7332	60.6214	90.5373	71.2874	65.2727	52.8776	44.4515	67.2106	63.316	124.833	115.54	84.7701	110.255	43.4384	11.2123	24.1887	13.5292	3.07018	4.73696	3.39941
MTA_Mm-int_dup687	25.4747	-1.74453	0.579535	-3.01022	0.0026106	0.0268089	Down	MTA_Mm-int	ERVL-MaLR	LTR	MTA_Mm-int:ERVL-MaLR:LTR	NA	2cWT-2cKO	19.8364	7.1585	4.16066	2.77932	5.2858	36.3185	0	10.5108	0	43.6697	0	0	0	0	30.6585	31.3675	54.2296	49.6759	78.1324	59.0608	27.3406	23.5334	26.3551	95.274	27.4556	32.8509	31.2122	44.6761	35.6135	7.23973	37.7141	77.9415	1.35292	4.09357	8.68443	23.7958
MTA_Mm-int_dup690	40.9505	-3.66039	0.693502	-5.27812	1.30516e-07	4.92486e-06	Down	MTA_Mm-int	ERVL-MaLR	LTR	MTA_Mm-int:ERVL-MaLR:LTR	NA	2cWT-2cKO	14.0022	9.20378	2.4964	2.77932	2.6429	1.17156	11.144	10.5108	17.3246	0	0	36.4311	0	0	62.6606	57.3796	51.9395	46.5185	55.5443	123.855	50.7403	140.038	25.6264	80.6527	41.3235	142.646	61.603	42.9578	85.1309	7.23973	1.0193	30.4599	0	95.1755	142.109	16.997
MTA_Mm-int_dup713	68.6996	-3.37866	0.871282	-3.8778	0.000105405	0.0020628	Down	MTA_Mm-int	ERVL-MaLR	LTR	MTA_Mm-int:ERVL-MaLR:LTR	NA	2cWT-2cKO:8cWT-8cKO	3.50054	2.04528	1.66426	0	18.5003	21.0882	0	21.0216	8.66229	43.6697	0	12.1437	0	0	144.009	61.0956	74.3824	57.464	26.5687	89.9381	147.295	85.9987	48.7023	68.8614	33.0588	82.2002	122.658	45.6785	109.036	279.936	44.8492	7.16703	251.643	0	0	615.292
MTA_Mm-int_dup717	157.151	-2.3237	0.789533	-2.94313	0.00324915	0.031391	Down	MTA_Mm-int	ERVL-MaLR	LTR	MTA_Mm-int:ERVL-MaLR:LTR	8cWT-2cWT	2cWT-2cKO	35.0054	26.5887	2.4964	16.6759	15.8574	57.4066	22.288	84.0864	69.2983	0	2211.73	24.2874	0	11.5449	187.371	97.7093	142.078	73.2509	122.012	82.7541	125.126	223.713	98.1333	106.201	81.2462	252.733	183.714	84.9133	74.642	371.639	29.5597	41.2104	127.175	159.649	4.73696	462.319
MTA_Mm-int_dup725	12.4114	-3.18703	0.703956	-4.52731	5.97397e-06	0.000162288	Down	MTA_Mm-int	ERVL-MaLR	LTR	MTA_Mm-int:ERVL-MaLR:LTR	NA	2cWT-2cKO:8cKO-2cKO	4.66739	2.04528	1.66426	2.77932	0	4.68626	0	10.5108	0	0	36.8621	0	0	0	6.47371	11.0387	24.1835	19.5757	3.98068	20.5158	38.9173	31.3779	1.70033	24.0543	6.58374	48.4733	87.0656	35.2254	14.8796	4.82649	5.0965	0.895879	1.35292	2.04678	3.15797	0
MTA_Mm-int_dup727	52.4976	-3.24194	0.505135	-6.41796	1.3811e-10	8.83509e-09	Down	MTA_Mm-int	ERVL-MaLR	LTR	MTA_Mm-int:ERVL-MaLR:LTR	NA	2cWT-2cKO:8cKO-2cKO	14.0022	11.7604	5.82493	11.1173	10.5716	11.7156	22.288	21.0216	17.3246	43.6697	36.8621	36.4311	16.1594	11.5449	118.115	134.104	156.002	157.658	70.9116	113.701	59.1149	105.755	34.9782	77.98	67.7985	199.295	70.6381	110.688	55.3717	12.0662	14.2702	85.1085	1.35292	13.3041	7.10544	6.79881
MTA_Mm-int_dup759	13.8329	-1.63933	0.5392	-3.0403	0.00236343	0.024938	Down	MTA_Mm-int	ERVL-MaLR	LTR	MTA_Mm-int:ERVL-MaLR:LTR	NA	2cWT-2cKO	10.5016	4.60189	1.66426	8.33796	2.6429	7.02939	0	0	0	43.6697	36.8621	0	16.1594	11.5449	26.1391	21.531	21.8017	12.2085	19.7182	9.94707	15.764	10.1688	5.46535	14.071	29.4167	32.9969	29.2956	11.3122	6.34213	12.0662	20.386	3.58352	1.35292	5.11696	29.2113	3.39941
MTA_Mm-int_dup805	25.3093	-2.80168	0.803229	-3.48802	0.000486611	0.00735711	Down	MTA_Mm-int	ERVL-MaLR	LTR	MTA_Mm-int:ERVL-MaLR:LTR	NA	2cWT-2cKO:8cKO-2cKO	23.3369	11.7604	1.66426	2.77932	0	0	0	21.0216	8.66229	0	36.8621	0	0	11.5449	91.6091	57.0517	51.0234	35.994	44.5281	45.0381	12.5619	90.0662	44.6944	34.4307	39.9227	81.0321	43.8066	12.3146	35.3696	0	6.1158	36.731	0	2.04678	54.475	0
MTA_Mm-int_dup83	129.574	-1.74464	0.393077	-4.43841	9.0626e-06	0.000234419	Down	MTA_Mm-int	ERVL-MaLR	LTR	MTA_Mm-int:ERVL-MaLR:LTR	NA	2cWT-2cKO:8cWT-8cKO	100.349	69.5397	38.2781	58.3657	15.8574	41.0047	22.288	63.0648	17.3246	0	36.8621	12.1437	48.4783	23.0898	127.52	185.801	132.276	215.122	116.643	128.345	286.707	280.367	122.059	146.212	160.951	276.385	173.036	185.864	197.582	279.936	45.8685	152.299	238.114	66.5205	36.3167	377.334
MTA_Mm-int_dup833	36.5497	-3.64322	0.62372	-5.84112	5.18502e-09	2.60682e-07	Down	MTA_Mm-int	ERVL-MaLR	LTR	MTA_Mm-int:ERVL-MaLR:LTR	NA	2cWT-2cKO	3.50054	8.69246	2.4964	2.77932	5.2858	3.51469	0	10.5108	25.9869	0	0	12.1437	32.3188	23.0898	36.2772	65.1395	63.9396	60.4109	34.7152	100.576	7.88198	50.2627	11.1736	75.5431	39.6425	102.787	81.5897	68.7325	52.2006	41.0251	40.772	18.8135	128.528	65.4971	3.15797	0
MTA_Mm-int_dup834	77.0622	-4.50915	0.767436	-5.87561	4.21287e-09	2.17316e-07	Down	MTA_Mm-int	ERVL-MaLR	LTR	MTA_Mm-int:ERVL-MaLR:LTR	8cWT-2cWT	2cWT-2cKO:8cWT-8cKO	3.50054	4.09057	8.32132	5.55864	5.2858	2.34313	11.144	21.0216	8.66229	43.6697	36.8621	12.1437	32.3188	46.1796	136.925	145.69	122.841	117.033	66.6532	74.3268	78.3272	112.437	167.604	107.773	92.5926	117.095	121.563	82.1927	106.353	470.582	42.8106	199.781	242.173	2.04678	0	3.39941
MTA_Mm-int_dup836	47.6476	-1.64802	0.472286	-3.48944	0.000484029	0.00732981	Down	MTA_Mm-int	ERVL-MaLR	LTR	MTA_Mm-int:ERVL-MaLR:LTR	NA	2cWT-2cKO:8cKO-2cKO	49.0076	9.20378	14.1462	30.5725	58.1438	15.2303	44.576	0	17.3246	0	36.8621	24.2874	0	23.0898	59.9734	101.862	79.1458	86.3013	67.8567	52.2912	21.4291	246.084	103.72	46.6937	99.3164	128.337	103.493	65.4391	84.3991	12.0662	2.0386	18.8135	8.11753	13.3041	3.15797	0
MTA_Mm-int_dup85	81.5943	-2.80225	0.624706	-4.48571	7.26726e-06	0.000193591	Down	MTA_Mm-int	ERVL-MaLR	LTR	MTA_Mm-int:ERVL-MaLR:LTR	NA	2cWT-2cKO	22.1701	39.883	3.32853	11.1173	2.6429	5.85782	0	42.0432	51.9738	174.679	73.7243	12.1437	32.3188	11.5449	78.906	65.2488	167.91	54.5172	127.567	43.104	71.1842	143.525	36.4356	92.7585	86.7093	209.661	189.737	90.4978	75.1299	91.7032	56.0615	14.3341	528.992	81.8714	7.89493	47.5917
MTA_Mm-int_dup861	226.967	-2.00703	0.574166	-3.49556	0.000473073	0.00718587	Down	MTA_Mm-int	ERVL-MaLR	LTR	MTA_Mm-int:ERVL-MaLR:LTR	8cWT-2cWT	2cWT-2cKO	82.8461	75.1642	80.7168	25.0139	37.0006	98.4114	33.432	966.994	17.3246	0	36.8621	510.035	32.3188	992.862	336.022	201.43	248.338	342.048	210.606	178.702	277.594	348.643	172.462	247.932	402.028	276.969	263.113	280.371	251.002	253.39	212.014	378.061	87.9399	146.345	31.5797	23.7958
MTA_Mm-int_dup87	1.5988	-3.25427	1.09345	-2.97615	0.00291894	0.0290235	Down	MTA_Mm-int	ERVL-MaLR	LTR	MTA_Mm-int:ERVL-MaLR:LTR	NA	2cWT-2cKO	0	0	0	0	2.6429	0	0	0	0	0	0	0	0	0	5.25225	4.37178	4.6718	1.26295	4.53612	2.41769	0.246312	2.32429	12.9954	2.51548	1.12064	2.48207	0.273791	1.14554	1.46357	0	0	0	4.05877	0	0.789493	0
MTA_Mm-int_dup875	222.675	-1.41171	0.476118	-2.96504	0.00302646	0.0297089	Down	MTA_Mm-int	ERVL-MaLR	LTR	MTA_Mm-int:ERVL-MaLR:LTR	NA	2cWT-2cKO	75.845	182.03	64.9063	19.4552	124.216	185.107	200.592	252.259	25.9869	174.679	147.449	12.1437	743.334	46.1796	373.765	276.187	263.728	161.657	306.975	326.181	263.307	535.167	146.107	166.887	226.509	500.501	200.689	209.205	396.871	130.315	380.199	435.397	117.704	123.83	90.0022	248.157
MTA_Mm-int_dup879	17.7964	-2.68124	0.678451	-3.95201	7.74975e-05	0.00157897	Down	MTA_Mm-int	ERVL-MaLR	LTR	MTA_Mm-int:ERVL-MaLR:LTR	NA	2cWT-2cKO:8cKO-2cKO	4.66739	2.55661	3.32853	5.55864	7.9287	4.68626	0	42.0432	8.66229	0	36.8621	12.1437	0	34.6347	26.6277	45.3572	19.1452	8.41964	29.6237	47.3177	43.8435	50.2627	5.34389	24.0543	40.7632	43.6551	33.6763	6.0141	11.7085	4.82649	0	1.79176	40.5877	8.18714	0.789493	3.39941
MTA_Mm-int_dup912	4.81075	-3.48413	0.962255	-3.62079	0.000293699	0.00487623	Down	MTA_Mm-int	ERVL-MaLR	LTR	MTA_Mm-int:ERVL-MaLR:LTR	NA	2cWT-2cKO	0	2.04528	0	2.77932	0	0	11.144	0	0	0	0	0	0	0	10.9931	4.15319	18.5956	1.26295	1.38861	13.9535	8.37461	1.74322	7.28713	10.5336	8.54486	7.4462	9.3089	14.892	15.8553	4.82649	17.3281	0	1.35292	0	0.789493	234.559
MTA_Mm-int_dup916	29.5935	-1.86497	0.558573	-3.33882	0.00084135	0.0113589	Down	MTA_Mm-int	ERVL-MaLR	LTR	MTA_Mm-int:ERVL-MaLR:LTR	NA	2cWT-2cKO:8cKO-2cKO	24.5038	17.8962	7.48919	8.33796	0	18.745	22.288	21.0216	0	0	147.449	0	16.1594	0	79.5167	39.0181	81.9856	30.7317	31.7529	24.8677	12.0693	120.863	21.497	50.6241	37.6814	101.765	33.1287	46.1081	15.3675	4.82649	20.386	9.85467	9.47045	4.09357	25.2638	10.1982
MTA_Mm-int_dup920	217.744	-1.30752	0.465691	-2.80769	0.00498978	0.043169	Down	MTA_Mm-int	ERVL-MaLR	LTR	MTA_Mm-int:ERVL-MaLR:LTR	NA	2cWT-2cKO:8cWT-8cKO	19.8364	44.4849	92.3667	25.0139	475.722	106.612	66.864	105.108	25.9869	43.6697	36.8621	60.7185	80.7971	57.7245	628.194	314.768	405.439	249.853	301.976	239.282	321.683	311.455	152.301	267.742	186.026	507.363	294.599	282.519	219.535	516.434	405.681	210.532	219.173	175	338.693	248.157
MTA_Mm-int_dup951	188.067	-1.94956	0.479078	-4.0694	4.71351e-05	0.00102469	Down	MTA_Mm-int	ERVL-MaLR	LTR	MTA_Mm-int:ERVL-MaLR:LTR	NA	2cWT-2cKO:8cKO-2cKO	109.684	56.2453	20.8033	94.4969	39.6435	135.901	122.584	63.0648	493.751	131.009	147.449	12.1437	145.435	80.8144	458.168	309.303	335.545	251.326	263.928	296.754	260.352	329.468	141.856	276.074	153.387	504.151	326.633	243.141	258.32	188.233	73.3896	159.466	351.76	28.655	26.0533	37.3935
MTA_Mm-int_dup961	49.6315	-1.26496	0.334226	-3.78473	0.000153875	0.00284893	Down	MTA_Mm-int	ERVL-MaLR	LTR	MTA_Mm-int:ERVL-MaLR:LTR	NA	2cWT-2cKO:8cKO-2cKO	53.6749	30.1679	23.2997	63.9244	21.1432	28.1175	0	21.0216	25.9869	43.6697	0	0	32.3188	11.5449	175.279	84.266	93.9857	60.2004	97.8506	77.1589	82.2682	89.7756	59.3901	72.3988	26.1949	110.671	116.909	53.6973	104.401	26.5457	29.5597	16.1258	44.6464	10.2339	18.1583	27.1952
MTA_Mm-int_dup999	1.99905	-3.32487	1.12218	-2.96286	0.00304796	0.0298901	Down	MTA_Mm-int	ERVL-MaLR	LTR	MTA_Mm-int:ERVL-MaLR:LTR	NA	2cWT-2cKO:8cKO-2cKO	0	0.511321	0.832132	0	0	0	0	0	0	0	0	0	0	0	13.5581	2.73236	2.83972	0.841964	11.7569	4.55908	0.738936	1.16214	2.91485	0.864698	11.4865	5.25614	1.64275	4.29578	0.731784	7.23973	0	0	0	0	0	0
MTB_Mm_dup893	9.48554	-5.73516	1.60923	-3.56391	0.000365364	0.00584795	Down	MTB_Mm	ERVL-MaLR	LTR	MTB_Mm:ERVL-MaLR:LTR	NA	2cWT-2cKO:8cKO-2cKO	0	0	0.832132	0	0	0	0	0	0	43.6697	36.8621	0	0	0	77.1959	18.3615	11.0841	43.7821	8.79452	39.9265	0	2.32429	5.34389	19.8094	0.14008	4.23411	38.6045	0	0	0	0	0	0	0	0	0
MTB-int_dup115	6.48564	-2.30157	0.760258	-3.02736	0.00246703	0.0257646	Down	MTB-int	ERVL-MaLR	LTR	MTB-int:ERVL-MaLR:LTR	NA	2cWT-2cKO:8cKO-2cKO	9.33477	1.53396	0.832132	0	2.6429	2.34313	0	0	0	0	0	0	0	0	2.32076	16.8314	14.3818	10.1036	1.29603	8.42738	3.94099	41.2561	22.9545	4.4021	21.4322	20.1485	19.1654	3.72301	21.2217	2.41324	0	0	2.70584	0	3.15797	3.39941
MTB-int_dup117	2.00463	-3.48991	1.13447	-3.07623	0.00209634	0.0230108	Down	MTB-int	ERVL-MaLR	LTR	MTB-int:ERVL-MaLR:LTR	8cWT-2cWT	2cWT-2cKO:8cKO-2cKO	1.16685	0	0	0	0	0	0	0	0	0	0	12.1437	0	0	3.17578	1.20224	4.5802	2.3154	2.22177	2.14138	2.95574	18.5943	0.485809	1.33635	0.560318	12.5563	3.0117	0.572771	0.731784	0	1.0193	0	0	0	0	3.39941
MTB-int_dup139	12.7192	-3.72438	1.10869	-3.35928	0.000781471	0.0107554	Down	MTB-int	ERVL-MaLR	LTR	MTB-int:ERVL-MaLR:LTR	8cWT-2cWT	2cWT-2cKO	1.16685	1.53396	1.66426	0	0	1.17156	0	0	0	0	0	36.4311	32.3188	0	18.0775	28.6352	14.9315	3.78884	0.740591	4.62815	8.12829	4.35804	29.6343	6.2101	11.0663	29.7848	13.142	6.30048	39.2724	0	0	2.68764	70.3519	1.02339	1.57899	101.982
MTB-int_dup432	20.1972	-1.39508	0.458475	-3.04288	0.00234329	0.024806	Down	MTB-int	ERVL-MaLR	LTR	MTB-int:ERVL-MaLR:LTR	NA	2cWT-2cKO:8cKO-2cKO	19.8364	18.9189	3.32853	5.55864	7.9287	7.02939	44.576	0	25.9869	43.6697	36.8621	12.1437	16.1594	0	42.5066	24.9191	33.2522	37.8884	24.3469	10.776	21.4291	17.7227	18.9465	15.3287	14.7084	42.1951	55.3058	31.0728	39.5164	0	4.0772	19.7093	10.8234	3.07018	4.73696	23.7958
MTB-int_dup45	2.54593	-2.58341	0.814207	-3.17292	0.00150916	0.0178854	Down	MTB-int	ERVL-MaLR	LTR	MTB-int:ERVL-MaLR:LTR	NA	2cWT-2cKO:8cKO-2cKO	0	2.55661	0	0	0	1.17156	0	0	0	0	0	0	0	0	4.64153	6.88555	6.13747	2.94687	6.10988	1.65785	5.41886	13.9457	8.50165	6.13149	3.92223	10.8043	2.73791	3.15024	0.975712	0	0	0.895879	0	1.02339	0	0
MTC_dup11177	7.70483	-4.34177	1.37881	-3.14893	0.00163872	0.0189921	Down	MTC	ERVL-MaLR	LTR	MTC:ERVL-MaLR:LTR	NA	2cWT-2cKO:8cKO-2cKO	1.16685	0	0.832132	0	0	2.34313	0	10.5108	0	0	0	0	0	11.5449	0	24.3727	19.9697	0	2.96237	35.7818	0.246312	26.1482	2.91485	34.2735	23.1131	70.9579	0	9.30753	6.58606	0	0	0	0	2.04678	0	0
MTC_dup3907	16.2029	-5.66553	1.69305	-3.34635	0.000818817	0.0111135	Down	MTC	ERVL-MaLR	LTR	MTC:ERVL-MaLR:LTR	8cWT-8cKO:8cWT-2cWT	2cWT-2cKO:8cKO-2cKO	0	0	0	0	0	0	0	0	0	0	0	777.196	0	415.617	16.6118	38.7995	4.85501	16.8393	7.22077	6.70046	23.8923	2.61482	12.3881	0.0786089	1.54088	0	27.6529	0	19.2703	0	3.0579	0	0	0	26.8428	0
MTD_dup34024	110.89	-15.7674	2.55982	-6.15957	7.29416e-10	4.21314e-08	Down	MTD	ERVL-MaLR	LTR	MTD:ERVL-MaLR:LTR	8cWT-2cWT:8cKO-2cKO	2cWT-2cKO	0	0	0	0	0	0	0	0	1273.36	0	36.8621	2380.16	258.551	46.1796	3.05364	0	0	0	0.277722	0.0690769	0	0	0	0	0	0	0	0	0	0	0	48.3775	0	0	56.054	0
MTD-int_dup1284	12.8528	-5.1805	1.31961	-3.92578	8.64481e-05	0.00173168	Down	MTD-int	ERVL-MaLR	LTR	MTD-int:ERVL-MaLR:LTR	NA	2cWT-2cKO	2.33369	0	0	0	0	1.17156	11.144	21.0216	0	0	0	0	0	0	7.69516	1.85801	17.3132	27.3638	37.3999	9.60169	67.9821	3.77697	20.6469	39.2258	6.72382	124.979	0	0.143193	13.66	0	0	0.895879	0	12.2807	34.7377	13.5976
MTD-int_dup2214	66.6679	-18.5042	2.26326	-8.17593	2.93592e-16	5.5745e-14	Down	MTD-int	ERVL-MaLR	LTR	MTD-int:ERVL-MaLR:LTR	8cWT-2cWT:8cKO-2cKO	2cWT-2cKO	0	0	0	0	0	0	0	0	563.049	0	0	1360.09	0	0	0	0.218589	0	0	0	0.345385	0	0.290536	4.85809	2.6727	7.98454	10.0743	0.273791	0	0	0	29.5597	166.634	0	0	52.1066	268.553
MTE2a_dup4203	73.2025	-18.5466	2.70983	-6.84419	7.69094e-12	6.29669e-10	Down	MTE2a	ERVL-MaLR	LTR	MTE2a:ERVL-MaLR:LTR	8cWT-8cKO:8cWT-2cWT	2cWT-2cKO:8cKO-2cKO	0	0	0	0	0	0	156.016	0	944.19	0	0	1117.22	468.623	0	0.122145	15.5198	0	0	0	0	0	0	0.121452	0.235827	0	0	0	6.44368	0	0	0	0	0	0	0	0
MTE2a_dup8012	4.12377	-4.8491	1.52567	-3.17834	0.00148119	0.0176477	Down	MTE2a	ERVL-MaLR	LTR	MTE2a:ERVL-MaLR:LTR	NA	2cWT-2cKO:8cKO-2cKO	0	0	0.832132	0	0	0	0	0	0	0	0	0	0	0	0	0	2.1985	34.0995	12.2198	11.8812	0.985248	2.32429	11.538	0.393044	0.700398	24.5286	0	26.4907	18.2946	0	1.0193	0	2.70584	0	2.36848	0
MTEa_dup2852	4.6348	-5.01701	1.56756	-3.20051	0.00137183	0.0166675	Down	MTEa	ERVL-MaLR	LTR	MTEa:ERVL-MaLR:LTR	NA	2cWT-2cKO:8cKO-2cKO	0	0.511321	0	0	0	0	11.144	0	0	0	0	0	0	0	0	1.9673	0.183208	0.420982	0	8.98	8.37461	18.8848	34.6139	1.808	6.02342	22.9226	48.1872	0	3.17107	0	0	0.895879	0	0	0	3.39941
ORR1A0_dup612	4.70274	-5.08842	1.73843	-2.92703	0.00342219	0.0326933	Down	ORR1A0	ERVL-MaLR	LTR	ORR1A0:ERVL-MaLR:LTR	NA	2cWT-2cKO	0	0	0	0	0	0	0	0	0	0	0	0	16.1594	0	2.93149	1.63942	0.549624	10.735	16.1079	0	5.41886	49.9722	0	3.61601	16.1092	0	4.92824	7.73241	0	0	0	19.7093	0	1.02339	17.3689	0
ORR1A0-int_dup154	97.1959	-3.02659	0.790046	-3.83091	0.000127672	0.00241642	Down	ORR1A0-int	ERVL-MaLR	LTR	ORR1A0-int:ERVL-MaLR:LTR	8cKO-2cKO	2cWT-2cKO:8cWT-8cKO	1.16685	2.55661	12.482	0	0	15.2303	0	21.0216	17.3246	43.6697	73.7243	0	0	34.6347	29.5592	44.4829	14.4734	37.4674	37.3073	49.3209	12.3156	136.261	38.8647	54.5546	82.5069	0.146004	20.8081	73.1715	49.5174	55.5046	218.13	405.833	75.7636	435.965	976.603	516.71
ORR1A0-int_dup159	123.374	-3.38642	1.08823	-3.11185	0.00185918	0.0209884	Down	ORR1A0-int	ERVL-MaLR	LTR	ORR1A0-int:ERVL-MaLR:LTR	8cWT-2cWT:8cKO-2cKO	2cWT-2cKO	0	0	1.66426	2.77932	2.6429	2.34313	44.576	483.497	1143.42	0	1105.86	230.73	177.754	0	4.51938	1.09294	17.2216	0	19.9034	5.73338	1.9705	11.0404	23.8046	6.28871	0.14008	0.438011	72.8284	46.5377	7.07391	214.779	229.342	277.723	101.469	97.2222	168.952	33.9941
ORR1A0-int_dup212	58.5959	-3.15825	0.926304	-3.40951	0.000650788	0.00934454	Down	ORR1A0-int	ERVL-MaLR	LTR	ORR1A0-int:ERVL-MaLR:LTR	8cWT-2cWT:8cKO-2cKO	2cWT-2cKO	4.66739	0	2.4964	2.77932	2.6429	0	0	10.5108	641.01	0	0	0	0	346.347	18.0775	21.3124	12.9162	6.9462	8.05393	13.8845	17.7345	36.0265	13.1168	25.3121	1.4008	8.61423	43.259	33.7935	2.43928	135.142	67.2738	69.8786	144.763	81.8714	201.321	33.9941
ORR1A0-int_dup347	5.11226	-3.99172	1.42681	-2.79766	0.00514749	0.0440635	Down	ORR1A0-int	ERVL-MaLR	LTR	ORR1A0-int:ERVL-MaLR:LTR	NA	2cWT-2cKO	0	0	0	0	0	1.17156	0	0	0	0	0	0	0	0	7.32873	1.63942	2.01529	0.631473	12.5901	0	9.35985	0	4.61518	1.49357	0.700398	14.3084	18.344	6.0141	1.21964	0	1.0193	2.68764	1.35292	45.0292	57.633	0
ORR1A0-int_dup351	8.05909	-19.3238	2.04769	-9.43687	3.84075e-21	1.95856e-18	Down	ORR1A0-int	ERVL-MaLR	LTR	ORR1A0-int:ERVL-MaLR:LTR	8cWT-2cWT	2cWT-2cKO	0	0	0	0	0	0	0	0	0	0	0	12.1437	0	0	6.22942	3.06025	7.78634	0.420982	0	0.621692	24.1386	13.3647	39.5934	10.2192	0	12.8483	0	0.143193	0.243928	0	0	0	0	0	167.373	0
ORR1A0-int_dup364	11.4149	-2.77731	0.919294	-3.02113	0.00251832	0.0261929	Down	ORR1A0-int	ERVL-MaLR	LTR	ORR1A0-int:ERVL-MaLR:LTR	NA	2cWT-2cKO	1.16685	3.06793	2.4964	0	0	2.34313	22.288	21.0216	0	0	0	0	0	0	11.1152	3.16954	22.2598	1.47344	0.833165	17.2002	26.3554	3.48643	7.04423	3.61601	5.04287	1.02203	26.8315	18.7583	33.906	4.82649	44.8492	101.234	9.47045	4.09357	16.5794	6.79881
ORR1A0-int_dup412	62.044	-2.42059	0.643803	-3.75984	0.000170023	0.00309334	Down	ORR1A0-int	ERVL-MaLR	LTR	ORR1A0-int:ERVL-MaLR:LTR	8cKO-2cKO	2cWT-2cKO:8cWT-8cKO	1.16685	8.18114	2.4964	8.33796	10.5716	2.34313	0	10.5108	0	0	36.8621	60.7185	32.3188	0	1.83218	10.4923	36.8248	5.26227	62.3022	29.9103	13.7935	23.2429	42.3868	20.8314	14.008	18.5425	60.7816	29.9273	48.5417	328.201	303.751	136.174	29.7643	120.76	516.329	176.769
ORR1A0-int_dup443	147.694	-2.15575	0.65913	-3.2706	0.00107319	0.0138198	Down	ORR1A0-int	ERVL-MaLR	LTR	ORR1A0-int:ERVL-MaLR:LTR	8cKO-2cKO	2cWT-2cKO:8cWT-8cKO	109.684	3.57925	6.65706	2.77932	34.3577	26.946	0	31.5324	86.6229	174.679	0	24.2874	113.116	23.0898	143.887	93.3375	140.887	189.863	16.0153	110.799	160.349	210.639	184.486	76.6436	308.315	6.57017	113.076	126.726	172.945	94.1165	720.645	539.319	254.349	297.807	727.123	33.9941
ORR1A1_dup4129	4.20633	-19.9818	3.58569	-5.57264	2.50907e-08	1.09491e-06	Down	ORR1A1	ERVL-MaLR	LTR	ORR1A1:ERVL-MaLR:LTR	NA	2cWT-2cKO:8cWT-8cKO	0	0	0	0	0	0	0	0	0	0	0	0	0	0	3.42007	2.84166	0	40.8352	0	0	0.246312	0	0	0	0	14.0164	0	0	0	260.63	0	0.895879	0	0	134.214	0
ORR1A1-int_dup153	2.26526	-3.4062	1.05579	-3.22621	0.00125442	0.015602	Down	ORR1A1-int	ERVL-MaLR	LTR	ORR1A1-int:ERVL-MaLR:LTR	8cWT-2cWT	2cWT-2cKO:8cKO-2cKO	0	1.02264	0	0	0	0	0	10.5108	0	0	0	0	0	0	18.3218	1.20224	9.80163	1.47344	1.48118	4.90446	1.23156	1.74322	1.70033	2.59409	11.2064	3.35809	1.36896	4.72536	0.731784	0	1.0193	1.79176	0	2.04678	1.57899	0
ORR1A1-int_dup21	43.3534	-4.42485	0.91746	-4.82294	1.41457e-06	4.34547e-05	Down	ORR1A1-int	ERVL-MaLR	LTR	ORR1A1-int:ERVL-MaLR:LTR	8cWT-2cWT:8cKO-2cKO	2cWT-2cKO:8cWT-8cKO	0	2.04528	2.4964	0	0	1.17156	0	115.619	0	0	36.8621	12.1437	16.1594	34.6347	27.727	30.821	4.94662	7.36718	20.9217	15.3351	1.9705	56.9451	83.0733	10.6122	43.2846	29.7848	26.2839	25.3451	5.12249	62.7443	210.995	288.473	39.2347	8.18714	258.954	10.1982
ORR1A1-int_dup264	5.05073	-3.77611	1.32049	-2.85963	0.00424134	0.0382917	Down	ORR1A1-int	ERVL-MaLR	LTR	ORR1A1-int:ERVL-MaLR:LTR	NA	2cWT-2cKO	0	1.02264	0	0	0	2.34313	0	0	0	0	0	0	0	0	3.05364	16.3942	4.03058	0.841964	16.8485	12.9865	0	30.7968	17.732	0	2.38135	0.146004	26.5577	14.6057	1.46357	2.41324	1.0193	0	0	3.07018	0.789493	23.7958
ORR1A1-int_dup383	19.9907	-3.21193	1.14318	-2.80965	0.00495958	0.0429702	Down	ORR1A1-int	ERVL-MaLR	LTR	ORR1A1-int:ERVL-MaLR:LTR	8cKO-2cKO	2cWT-2cKO:8cWT-8cKO	1.16685	0	0	0	0	4.68626	0	10.5108	0	43.6697	0	0	0	0	4.64153	31.914	0.366416	4.20982	0.648017	10.0162	0.492624	36.317	4.73663	9.27585	23.6735	0	6.29719	14.0329	0.243928	103.769	59.1194	147.82	78.4695	1.02339	102.634	16.997
ORR1A1-int_dup387	57.525	-4.91475	1.28849	-3.81436	0.000136539	0.00257062	Down	ORR1A1-int	ERVL-MaLR	LTR	ORR1A1-int:ERVL-MaLR:LTR	8cWT-2cWT:8cKO-2cKO	2cWT-2cKO	0	1.02264	0	0	2.6429	0	0	0	511.075	43.6697	258.035	12.1437	0	0	9.77164	13.3339	19.5116	14.5239	16.4782	0.345385	3.20206	3.48643	11.538	5.97427	65.9775	0.146004	0.821373	33.2207	48.5417	434.384	60.1387	258.013	1.35292	173.977	90.7917	6.79881
ORR1A1-int_dup548	65.7057	-3.39798	0.966057	-3.51737	0.000435853	0.00676046	Down	ORR1A1-int	ERVL-MaLR	LTR	ORR1A1-int:ERVL-MaLR:LTR	8cKO-2cKO	2cWT-2cKO:8cWT-8cKO	2.33369	2.55661	0	13.8966	0	5.85782	0	0	17.3246	43.6697	0	12.1437	16.1594	0	56.1869	21.7496	10.2596	90.9321	51.1934	14.5752	69.7063	32.2495	35.3426	22.4821	118.227	0	69.5429	11.5986	7.8057	152.034	332.292	254.43	188.056	6.14035	768.967	3.39941
ORR1A1-int_dup703	13.786	-3.37175	1.14784	-2.93748	0.00330893	0.0317857	Down	ORR1A1-int	ERVL-MaLR	LTR	ORR1A1-int:ERVL-MaLR:LTR	8cKO-2cKO	2cWT-2cKO	2.33369	0.511321	1.66426	0	0	0	0	10.5108	857.567	43.6697	0	0	0	11.5449	10.2602	0.655767	0.549624	17.4707	14.7193	26.6637	6.40411	6.68233	17.8535	3.45879	0.700398	0.146004	8.76131	6.58687	19.5142	214.779	1.0193	23.2929	1.35292	26.6082	32.3692	0
ORR1A2_dup11604	60.3112	-16.9156	2.18413	-7.74479	9.57421e-15	1.36704e-12	Down	ORR1A2	ERVL-MaLR	LTR	ORR1A2:ERVL-MaLR:LTR	8cWT-2cWT:8cKO-2cKO	2cWT-2cKO	0	0	0	0	0	0	0	451.965	1377.3	0	0	182.155	48.4783	0	5.3744	0	1.55727	0	0	0	0	0	0	0	0.840478	0	0	0.286386	0	0	0	3.58352	9.47045	2.04678	70.2649	78.1863
ORR1A2_dup3138	40.4827	-17.1437	3.00622	-5.70274	1.17898e-08	5.50849e-07	Down	ORR1A2	ERVL-MaLR	LTR	ORR1A2:ERVL-MaLR:LTR	8cWT-2cWT	2cWT-2cKO	0	0	0	0	0	0	0	136.64	0	0	0	898.633	0	415.617	0	0	0	5.05178	0	0	0	0	4.37228	0	0	0	0	0	0	0	10.193	23.2929	4.05877	0	0	0
ORR1A2-int_dup1410	3.94287	-5.13604	1.50118	-3.42134	0.000623128	0.00907885	Down	ORR1A2-int	ERVL-MaLR	LTR	ORR1A2-int:ERVL-MaLR:LTR	NA	2cWT-2cKO	0	0	0	0	0	0	0	0	0	0	0	0	0	0	2.6872	10.1644	9.0688	3.36786	10.0906	20.4468	4.92624	0	17.3677	4.87375	1.68096	0.292008	0	21.1925	17.3189	0	0	0	5.41169	0	0	16.997
ORR1A2-int_dup153	4.17108	-4.36879	1.40173	-3.11671	0.0018288	0.0207241	Down	ORR1A2-int	ERVL-MaLR	LTR	ORR1A2-int:ERVL-MaLR:LTR	NA	2cWT-2cKO:8cKO-2cKO	1.16685	0.511321	0	0	0	0	0	0	8.66229	0	0	0	0	0	44.5831	15.6291	10.9009	14.5239	0.0925739	1.10523	0	0	29.5129	6.36732	0.560318	3.35809	0	4.0094	5.36642	0	1.0193	0	1.35292	1.02339	0	0
ORR1A2-int_dup154	6.15439	-4.25376	1.41036	-3.01609	0.00256058	0.0264475	Down	ORR1A2-int	ERVL-MaLR	LTR	ORR1A2-int:ERVL-MaLR:LTR	NA	2cWT-2cKO	0	0	0.832132	0	0	1.17156	0	0	0	0	0	0	0	11.5449	7.69516	13.1153	12.9162	18.1022	0	1.51969	11.3303	10.7498	7.53003	0.943306	7.28414	0	0	15.4648	30.9789	0	40.772	10.7505	0	11.2573	0	0
ORR1A2-int_dup1971	48.3278	-3.41949	1.16303	-2.94015	0.00328056	0.0315689	Down	ORR1A2-int	ERVL-MaLR	LTR	ORR1A2-int:ERVL-MaLR:LTR	8cWT-2cWT	2cWT-2cKO	3.50054	0	17.4748	5.55864	0	0	0	325.835	0	262.018	0	12.1437	16.1594	11.5449	86.8454	94.2118	40.0309	5.68326	24.5321	26.8709	111.087	69.4381	46.1518	37.8895	12.0468	38.253	19.1654	20.6198	89.2777	2.41324	98.8721	0	307.113	1.02339	2.36848	0
ORR1A2-int_dup2037	21.987	-4.5365	1.52862	-2.9677	0.00300038	0.0295534	Down	ORR1A2-int	ERVL-MaLR	LTR	ORR1A2-int:ERVL-MaLR:LTR	8cWT-2cWT	2cWT-2cKO	0	0	0	2.77932	0	1.17156	0	0	8.66229	0	0	449.317	0	0	6.84015	0	5.58784	58.727	8.5168	2.55585	13.3008	1.45268	9.59472	2.43687	0.840478	47.7433	16.975	0.429578	0.243928	0	0	68.9827	43.2935	0	33.1587	3.39941
ORR1A2-int_dup435	4.05571	-4.66336	1.37378	-3.39454	0.000687443	0.00978422	Down	ORR1A2-int	ERVL-MaLR	LTR	ORR1A2-int:ERVL-MaLR:LTR	NA	2cWT-2cKO:8cKO-2cKO	0	0	0.832132	0	0	0	11.144	0	0	0	0	0	0	0	12.4588	9.18074	12.9162	3.15736	0.277722	0.898	0	0	13.3597	1.25774	2.10119	37.085	10.9516	22.3381	1.46357	7.23973	0	0	1.35292	2.04678	0	0
ORR1A2-int_dup610	35.766	-4.73861	1.02428	-4.62629	3.72276e-06	0.000105133	Down	ORR1A2-int	ERVL-MaLR	LTR	ORR1A2-int:ERVL-MaLR:LTR	8cWT-2cWT	2cWT-2cKO	4.66739	0.511321	0.832132	0	2.6429	0	0	31.5324	0	0	0	0	0	92.3593	74.753	21.9682	26.1987	50.0968	38.9736	27.2854	2.95574	23.824	43.6013	35.1382	54.2108	0	102.672	17.1831	44.8828	130.315	89.6984	11.6464	74.4107	41.9591	265.27	0
ORR1A2-int_dup892	15.7387	-4.98529	1.5316	-3.25496	0.00113408	0.0144959	Down	ORR1A2-int	ERVL-MaLR	LTR	ORR1A2-int:ERVL-MaLR:LTR	NA	2cWT-2cKO:8cWT-8cKO	0	0	0	0	0	1.17156	0	0	0	0	0	0	0	0	11.9703	13.2246	15.6643	0.210491	3.05494	1.17431	28.0796	0.290536	27.2053	1.49357	26.6151	0.146004	16.7013	0.143193	14.1478	390.945	5.0965	0	5.41169	0	15.0004	0
ORR1A3-int_dup1268	3.59957	-3.50818	1.08637	-3.22928	0.00124101	0.0154928	Down	ORR1A3-int	ERVL-MaLR	LTR	ORR1A3-int:ERVL-MaLR:LTR	NA	2cWT-2cKO	1.16685	0.511321	0.832132	0	0	0	0	0	0	0	0	0	0	11.5449	16.1232	3.9346	4.94662	13.8924	6.10988	0.898	0.738936	0.871608	7.77294	4.87375	13.5877	8.32222	2.46412	13.8897	1.21964	4.82649	0	0	1.35292	13.3041	0	0
ORR1A3-int_dup840	9.85502	-5.30248	1.67989	-3.15645	0.001597	0.0185725	Down	ORR1A3-int	ERVL-MaLR	LTR	ORR1A3-int:ERVL-MaLR:LTR	NA	2cWT-2cKO	0	0	0	0	0	0	0	21.0216	0	0	0	0	1147.32	0	13.1917	0.327883	0	3.78884	2.4995	7.11492	76.603	1.16214	0.485809	13.0491	22.1326	0	50.1038	6.15729	15.8553	333.027	3.0579	1.79176	197.527	0	0	0
ORR1A3-int_dup963	7.18155	-3.68632	1.25051	-2.94785	0.0031999	0.0310326	Down	ORR1A3-int	ERVL-MaLR	LTR	ORR1A3-int:ERVL-MaLR:LTR	NA	2cWT-2cKO	1.16685	0	1.66426	0	0	1.17156	0	0	0	0	0	0	0	0	0.244291	24.9191	8.51917	1.05245	12.6826	5.66431	0.738936	0	15.4244	6.76036	5.18295	16.3524	36.688	18.0423	2.92714	0	5.0965	1.79176	0	85.9649	10.2634	3.39941
ORR1A4-int_dup163	24.5246	-6.05971	1.51824	-3.99128	6.5717e-05	0.0013769	Down	ORR1A4-int	ERVL-MaLR	LTR	ORR1A4-int:ERVL-MaLR:LTR	8cWT-2cWT	2cWT-2cKO	1.16685	0	0.832132	0	0	1.17156	22.288	0	164.584	0	0	0	0	0	1.83218	0.218589	8.33596	1.47344	2.96237	34.124	18.4734	31.6684	27.0838	82.4607	51.5493	402.679	0	4.29578	0	0	1.0193	0	5.41169	14.3275	26.0533	3.39941
ORR1B1_dup12523	28.2954	-5.03763	1.57807	-3.19228	0.00141155	0.017034	Down	ORR1B1	ERVL-MaLR	LTR	ORR1B1:ERVL-MaLR:LTR	8cWT-2cWT	2cWT-2cKO	0	1.02264	0	0	0	0	0	0	0	786.055	0	0	0	0	10.5045	1.42083	31.7866	8.84062	25.2727	17.8218	5.91149	0	2.7934	11.7127	19.6111	0	30.3908	0.715964	30.7349	0	24.4632	21.5011	142.057	2.04678	10.2634	0
ORR1B1_dup16188	117.444	-15.3897	2.09569	-7.34353	2.0804e-13	2.29204e-11	Down	ORR1B1	ERVL-MaLR	LTR	ORR1B1:ERVL-MaLR:LTR	8cWT-2cWT:8cKO-2cKO	2cWT-2cKO	0	0	0	0	0	0	0	704.224	372.479	0	810.967	24.2874	0	2158.9	0	0	0	0	0	0	0	0.290536	0	1.808	0	0.146004	0.273791	0	0	38.6119	151.876	73.4621	8.11753	0	0	0
ORR1B1-int_dup2942	21.1216	-6.2416	1.82069	-3.42815	0.000607721	0.00889795	Down	ORR1B1-int	ERVL-MaLR	LTR	ORR1B1-int:ERVL-MaLR:LTR	NA	2cWT-2cKO	1.16685	0	0	0	0	0	22.288	0	0	0	0	0	0	0	24.9177	11.5852	5.95426	15.5763	0.277722	7.66754	9.35985	38.3508	0	21.7747	0	90.0844	2.46412	1.57512	0	0	0	0	0	215.936	23.6848	0
ORR1B1-int_dup597	3.54251	-5.12875	1.52477	-3.36362	0.000769267	0.0106515	Down	ORR1B1-int	ERVL-MaLR	LTR	ORR1B1-int:ERVL-MaLR:LTR	NA	2cWT-2cKO	0	0	0	0	0	0	0	0	0	0	0	0	0	0	0.244291	14.864	4.85501	3.78884	0	2.90123	4.92624	8.13501	25.8693	12.0272	0.14008	0	21.9033	2.43428	20.9778	0	0	0	4.05877	0	3.94747	0
ORR1C2_dup858	67.3274	-15.8202	2.2606	-6.99826	2.59157e-12	2.37201e-10	Down	ORR1C2	ERVL-MaLR	LTR	ORR1C2:ERVL-MaLR:LTR	8cWT-2cWT:8cKO-2cKO	2cWT-2cKO	0	0	0	0	0	0	89.152	872.397	528.4	0	0	0	921.087	0	0	0.546472	0	0	0	2.90123	0	0	0	0	0	0	0	0	0	0	26.5018	18.8135	13.5292	0	0.789493	16.997
ORR1D1_dup20484	6.4367	-5.25632	1.91622	-2.74306	0.00608694	0.0494419	Down	ORR1D1	ERVL-MaLR	LTR	ORR1D1:ERVL-MaLR:LTR	NA	2cWT-2cKO	0	0.511321	0	0	0	0	0	0	0	0	0	0	0	11.5449	0.122145	14.864	0.091604	60.2004	0.185148	1.93415	0	14.8173	29.7558	0.943306	0	0	35.319	13.8897	10.9768	0	0	43.0022	0	0	0	0
RMER1A_dup1529	3.23499	-5.06802	1.30343	-3.88822	0.000100984	0.00198716	Down	RMER1A	RMER1A	Other	RMER1A:RMER1A:Other	8cWT-2cWT	2cWT-2cKO:8cKO-2cKO	0	0	0	0	0	0	0	578.094	0	0	0	0	0	0	1.09931	5.57402	2.93133	4.84129	8.79452	16.2331	0	1.45268	0.242904	12.1058	2.52143	23.3606	15.8799	2.86386	20.0021	0	0	1.79176	0	0	0	0
RMER1B_dup6989	10.7623	-4.38888	1.31134	-3.34688	0.000817276	0.011101	Down	RMER1B	RMER1B	Other	RMER1B:RMER1B:Other	NA	2cWT-2cKO:8cKO-2cKO	0	0.511321	0.832132	0	0	3.51469	0	0	0	87.3395	0	0	0	0	0.122145	2.29518	4.6718	38.5198	0	1.17431	9.11354	55.2018	2.42904	23.5041	40.3429	53.7294	22.9985	14.3193	26.8321	0	9.1737	0	0	0	1.57899	0
MMSAT4_dup1130	117.128	-18.0872	2.29715	-7.87376	3.4414e-15	5.34105e-13	Down	MMSAT4	Satellite	Satellite	MMSAT4:Satellite:Satellite	8cWT-8cKO:8cWT-2cWT	2cWT-2cKO	0	0	0	0	0	0	0	273.281	0	0	2027.42	1979.42	0	23.0898	3.17578	0.874356	0	0	1.7589	0	0	0	0	10.0619	0	0	0.273791	0	3.90285	0	0	1.79176	0	0	8.68443	0
MMSAT4_dup1505	76.2994	-17.4758	2.95437	-5.91523	3.31412e-09	1.73462e-07	Down	MMSAT4	Satellite	Satellite	MMSAT4:Satellite:Satellite	8cWT-2cWT:8cKO-2cKO	2cWT-2cKO	0	0	0	0	0	0	0	683.202	0	0	0	0	0	1108.31	0	0	0	0	0	12.4338	0	0	0	0	0	0	0	0	0	142.381	0	109.297	89.2928	150.439	252.638	0
MMSAT4_dup1521	6.10468	-5.85957	1.73464	-3.37796	0.000730244	0.0102303	Down	MMSAT4	Satellite	Satellite	MMSAT4:Satellite:Satellite	NA	2cWT-2cKO:8cKO-2cKO	0	0	0	0	0	0	0	0	0	0	0	0	16.1594	0	52.5225	19.0172	1.64887	18.1022	1.7589	0.0690769	2.21681	0	20.0396	1.808	0	0	79.3994	7.58922	0	0	0	0	1.35292	0	0.789493	3.39941
MMSAT4_dup341	5.03463	-4.65628	1.33341	-3.49202	0.000479389	0.00727563	Down	MMSAT4	Satellite	Satellite	MMSAT4:Satellite:Satellite	NA	2cWT-2cKO:8cKO-2cKO	0	0	1.66426	0	0	0	0	0	0	0	0	0	0	0	14.7796	12.6782	0.274812	25.8904	0.370296	0.138154	0	16.8511	2.67195	12.8132	2.52143	37.231	26.8315	5.44133	18.7825	0	4.0772	0.895879	0	0	2.36848	0
MMSAT4_dup356	3.01982	-3.58984	1.21581	-2.95263	0.00315076	0.0306459	Down	MMSAT4	Satellite	Satellite	MMSAT4:Satellite:Satellite	NA	2cWT-2cKO:8cKO-2cKO	0	0	0	0	2.6429	1.17156	0	0	0	0	0	0	16.1594	0	15.5125	0.109294	15.2063	14.5239	6.0173	6.97677	12.8082	4.93911	3.52211	1.10052	2.10119	2.62807	0.547582	1.57512	0.243928	0	0	0	0	0	3.94747	0
MMSAT4_dup562	55.334	-5.44812	1.63351	-3.33523	0.000852301	0.0114547	Down	MMSAT4	Satellite	Satellite	MMSAT4:Satellite:Satellite	8cWT-8cKO:8cWT-2cWT	2cWT-2cKO	0	0.511321	0	0	0	0	0	115.619	8.66229	43.6697	73.7243	24.2874	0	1477.75	0.122145	20.8752	0.274812	18.3127	14.349	32.0517	0	38.0602	0	37.4178	0.420239	10.0743	23.8198	13.6033	0	31.3722	1.0193	0	0	52.193	0	0
ZP3AR_dup1447	118.141	-15.8851	3.37173	-4.71127	2.46179e-06	7.21478e-05	Down	ZP3AR	Satellite	Satellite	ZP3AR:Satellite:Satellite	8cWT-2cWT:8cKO-2cKO	2cWT-2cKO	0	0	0	0	0	0	668.64	0	1247.37	0	0	0	2019.93	0	0	0	0	0	0	3.73015	0	0	0	0	0	0	0	0	0	349.92	0	23.2929	0	58.3333	0	0
B1_Mm_dup13110	46.6522	-15.2941	2.54776	-6.00298	1.93729e-09	1.04778e-07	Down	B1_Mm	Alu	SINE	B1_Mm:Alu:SINE	8cWT-2cWT:8cKO-2cKO	2cWT-2cKO	0	0	0	0	0	0	0	10.5108	86.6229	0	0	206.443	0	958.227	1.71004	0	0	0	0	0	0	0	0	0	0.700398	0	0	0	0	0	172.262	40.3146	0	0	0	244.757
B1_Mm_dup14021	105.263	-16.3096	2.89862	-5.62667	1.83717e-08	8.23863e-07	Down	B1_Mm	Alu	SINE	B1_Mm:Alu:SINE	8cWT-8cKO:8cWT-2cWT	2cWT-2cKO	0	0	0	0	0	0	156.016	1692.24	554.387	0	0	1469.39	0	0	0	0	0	0	5.55443	0	0	0	0	0	0	0	0	0	0	2.41324	0	11.6464	0	3.07018	0	0
B1_Mm_dup17499	205.896	-4.34622	1.51158	-2.87529	0.00403663	0.0368332	Down	B1_Mm	Alu	SINE	B1_Mm:Alu:SINE	8cWT-2cWT:8cKO-2cKO	2cWT-2cKO	0	0	0	0	0	0	612.92	294.303	597.698	0	36.8621	2841.62	80.7971	2274.35	0.244291	0	1.92368	0	1.85148	2.27954	3.69468	8.42554	0	4.32349	0.700398	41.0271	0	7.01645	0	277.523	99.8914	49.2734	169.115	2.04678	6.31595	203.964
B1_Mm_dup18413	55.5325	-13.662	2.63379	-5.1872	2.13478e-07	7.58439e-06	Down	B1_Mm	Alu	SINE	B1_Mm:Alu:SINE	8cWT-2cWT:8cKO-2cKO	2cWT-2cKO	0	0	0	0	0	0	0	1282.32	372.479	0	36.8621	291.449	0	0	0	0.655767	0	0	0	0	0	0	0	0	0	0	0	0	0	0	0	0	40.5877	15.3509	15.0004	0
B1_Mm_dup22426	62.2579	-12.9515	3.31939	-3.90177	9.54927e-05	0.00189162	Down	B1_Mm	Alu	SINE	B1_Mm:Alu:SINE	8cWT-2cWT:8cKO-2cKO	2cWT-2cKO	0	0	0	0	0	0	1682.74	0	0	0	0	0	0	0	0	0	0	0	0	0	0	0	0	0	0	11.3883	0	0	0	0	0	146.924	0	63.4503	82.8968	322.944
B1_Mm_dup25702	156.11	-14.88	2.0891	-7.12269	1.05842e-12	1.04949e-10	Down	B1_Mm	Alu	SINE	B1_Mm:Alu:SINE	8cWT-2cWT:8cKO-2cKO	2cWT-2cKO	0	0	0	0	0	0	0	0	0	0	3907.39	12.1437	452.464	484.886	0	0	0.641228	0	0	0	0.492624	0	0	0.235827	0	0	0	0.429578	0	0	695.162	8.95879	160.998	48.0994	0.789493	3.39941
B1_Mm_dup29914	69.1896	-15.7687	3.73175	-4.22555	2.38361e-05	0.00055394	Down	B1_Mm	Alu	SINE	B1_Mm:Alu:SINE	8cWT-2cWT	2cWT-2cKO	0	0	0	0	0	0	0	903.929	623.685	0	0	692.191	0	0	0	0	0	0	0	0	0	0	0	0	0	3.50409	0	0	0	318.548	0	0	0	0	18.1583	0
B1_Mm_dup37481	65.8775	-18.809	2.30857	-8.14746	3.71656e-16	6.83847e-14	Down	B1_Mm	Alu	SINE	B1_Mm:Alu:SINE	8cWT-2cWT	2cWT-2cKO	0	0	0	0	0	0	11.144	693.713	814.255	43.6697	0	0	0	565.7	0.977164	0	0	0	9.25739	0	0	1.16214	0	0	0	10.2203	0	0.286386	11.9525	103.769	2.0386	169.321	0	0	0	0
B1_Mm_dup39602	55.0151	-12.616	2.3233	-5.43024	5.62797e-08	2.29334e-06	Down	B1_Mm	Alu	SINE	B1_Mm:Alu:SINE	8cWT-2cWT:8cKO-2cKO	2cWT-2cKO	0	0	0	0	0	0	1080.97	126.13	762.282	0	0	0	0	0	0	0.109294	0	0	0	0	0.246312	0	0	0	0	0	0	0	0	38.6119	14.2702	0	2.70584	10.2339	0	0
B1_Mm_dup41238	86.1871	-16.1636	2.37102	-6.81715	9.28654e-12	7.46605e-10	Down	B1_Mm	Alu	SINE	B1_Mm:Alu:SINE	8cWT-2cWT:8cKO-2cKO	2cWT-2cKO	0	0	0	0	0	0	0	451.965	320.505	0	0	886.49	1438.19	0	3.90865	0.109294	0	0	0	0.690769	0	0	0	0	0	0	0	0	0	2.41324	50.965	0	0	15.3509	0	0
B1_Mm_dup42186	108.367	-12.0134	2.58566	-4.64615	3.38182e-06	9.62658e-05	Down	B1_Mm	Alu	SINE	B1_Mm:Alu:SINE	8cWT-2cWT:8cKO-2cKO	2cWT-2cKO	0	0	0	0	0	0	289.744	231.238	86.6229	0	0	2780.91	403.986	103.904	0	0	0	0	0	0	0	0.290536	0	0	0	0	0	0	0	0	0	112.881	0	0	0	0
B1_Mm_dup6667	7.80649	-4.64565	1.59989	-2.90373	0.00368742	0.0344932	Down	B1_Mm	Alu	SINE	B1_Mm:Alu:SINE	8cWT-2cWT	2cWT-2cKO	0	0.511321	0	0	0	0	55.72	0	0	0	0	619.328	0	0	0	14.864	15.6643	0	9.72026	16.9929	1.23156	9.29715	12.631	2.20105	4.62263	0.146004	9.03511	2.43428	21.2217	171.34	97.8528	0	0	12.2807	0	0
B1_Mm_dup7791	136.515	-17.2983	2.57756	-6.71114	1.93115e-11	1.454e-09	Down	B1_Mm	Alu	SINE	B1_Mm:Alu:SINE	8cWT-2cWT	2cWT-2cKO	0	0	0	0	0	0	211.736	126.13	1715.13	43.6697	0	1930.85	646.377	184.719	0	0	0	0	9.25739	0	0	1.45268	0	0	0	0	0	0.286386	0	0	181.435	0	0	0	0	0
B1_Mm_dup7804	110.238	-4.97287	1.69972	-2.92571	0.00343676	0.0327667	Down	B1_Mm	Alu	SINE	B1_Mm:Alu:SINE	8cWT-2cWT	2cWT-2cKO	0	0	0	0	0	0	401.184	346.857	1463.93	0	626.656	619.328	0	23.0898	12.8253	0.765061	3.84737	1.68393	0	0.0690769	0	0.581072	37.8931	4.71653	17.2298	8.76023	0	21.9085	0	243.738	26.5018	142.445	0	0	0	74.7869
B1_Mur1_dup17845	102.621	-18.5256	3.00277	-6.16952	6.84961e-10	3.96922e-08	Down	B1_Mur1	Alu	SINE	B1_Mur1:Alu:SINE	8cWT-2cWT	2cWT-2cKO	0	0	0	0	0	0	0	10.5108	0	131.009	0	582.897	0	2689.96	0	0	0	0	0	0	0	4.0675	0	0.235827	0	7.7382	15.0585	0	0	352.333	0	0	0	0	3.15797	0
B1_Mur1_dup34587	73.3975	-16.26	2.9658	-5.48251	4.19341e-08	1.74869e-06	Down	B1_Mur1	Alu	SINE	B1_Mur1:Alu:SINE	8cWT-2cWT	2cWT-2cKO	0	0	0	0	0	0	401.184	346.857	0	960.734	0	0	953.406	0	0	0	0	0	0	0	0	0	0	0	5.04287	0	0	0	0	0	3.0579	3.58352	0	0	41.8432	0
B1_Mur1_dup9575	10.213	-16.2777	4.32735	-3.76159	0.000168834	0.00307484	Down	B1_Mur1	Alu	SINE	B1_Mur1:Alu:SINE	8cWT-2cWT	2cWT-2cKO	0	0	0	0	0	0	0	273.281	0	0	0	971.495	0	0	0	0	0.091604	0	0	0	0	0	0	5.03097	0	0	0	13.1737	0	0	127.412	0	0	0	99.4762	0
B1_Mur2_dup12174	42.5814	-17.6799	2.28444	-7.73926	9.99939e-15	1.41642e-12	Down	B1_Mur2	Alu	SINE	B1_Mur2:Alu:SINE	8cWT-2cWT:8cKO-2cKO	2cWT-2cKO	0	0	0	0	0	0	0	0	25.9869	0	0	740.765	16.1594	554.156	1.83218	0	3.20614	16.4183	0	0	0	0.581072	0	1.10052	0	0.584015	7.39236	0	0	0	133.528	89.5879	0	0	0	0
B1_Mur2_dup12220	124.449	-18.7216	2.12396	-8.8145	1.20223e-18	3.5176e-16	Down	B1_Mur2	Alu	SINE	B1_Mur2:Alu:SINE	8cWT-2cWT:8cKO-2cKO	2cWT-2cKO	0	0	0	0	0	0	0	105.108	0	43.6697	0	3691.68	0	103.904	0.855018	0	0	16.8393	0	0	0.246312	0	0	0	0	0	8.48752	2.57747	2.68321	168.927	136.586	186.343	0	40.9357	92.3707	3.39941
B1_Mur2_dup3431	44.7418	-17.5474	2.29925	-7.6318	2.31506e-14	3.08352e-12	Down	B1_Mur2	Alu	SINE	B1_Mur2:Alu:SINE	8cWT-2cWT	2cWT-2cKO	0	0	0	0	0	0	0	294.303	0	0	0	24.2874	210.073	1015.95	1.58789	2.0766	0.549624	0	2.31435	0	0	0	0	2.12244	1.4008	0	0	0	2.92714	0	97.8528	0	0	0	0	0
B1_Mur3_dup16663	105.677	-17.1391	2.18666	-7.83804	4.57622e-15	6.86357e-13	Down	B1_Mur3	Alu	SINE	B1_Mur3:Alu:SINE	8cWT-8cKO:8cWT-2cWT	2cWT-2cKO	0	0	0	0	0	0	22.288	168.173	0	0	700.381	2258.73	743.334	0	0.122145	1.74871	0	0	4.53612	0	0	3.1959	0	0	0	0	0	0	0	0	3.0579	1.79176	2.70584	0	0	0
B1_Mur3_dup6045	10.3597	-17.7594	2.89696	-6.13034	8.76891e-10	4.96849e-08	Down	B1_Mur3	Alu	SINE	B1_Mur3:Alu:SINE	8cWT-2cWT	2cWT-2cKO	0	0	0	0	0	0	0	0	0	0	36.8621	0	0	0	3.42007	8.52497	0	0	0	3.38477	0	0	0	0.628871	0	0	0	0	0	263.043	0	16.1258	0	0	51.3171	0
B1_Mur3_dup7113	116.348	-16.7944	2.88411	-5.82308	5.77727e-09	2.88831e-07	Down	B1_Mur3	Alu	SINE	B1_Mur3:Alu:SINE	8cWT-2cWT	2cWT-2cKO	0	0	0	0	0	0	89.152	1524.07	0	2401.84	0	0	193.913	0	0	0	0	0	7.40591	0	0	0	0	0.0786089	0	0	0	0	0	0	68.2931	0	0	5.11696	15.0004	0
B1_Mur3_dup9644	104.684	-12.8909	2.02259	-6.37345	1.84828e-10	1.14941e-08	Down	B1_Mur3	Alu	SINE	B1_Mur3:Alu:SINE	8cWT-2cWT:8cKO-2cKO	2cWT-2cKO	0	0	0	0	0	0	0	42.0432	320.505	218.349	0	2610.89	0	242.443	0	0	0	0	0	0	0.246312	0	0	0	0	0	0.273791	0	0	272.696	2.0386	97.6508	62.2344	0	3.94747	0
B1_Mur4_dup1762	6.35696	-5.43634	1.88388	-2.88572	0.00390525	0.0359098	Down	B1_Mur4	Alu	SINE	B1_Mur4:Alu:SINE	NA	2cWT-2cKO	0	0	0	0	0	0	11.144	0	8.66229	0	0	0	0	0	40.6744	10.1644	3.38935	27.5743	4.99899	2.34861	0	0	12.3881	6.60315	29.837	14.1624	0	0	0	0	48.9264	14.3341	0	0	0	0
B1_Mur4_dup19029	50.0459	-17.1921	3.22165	-5.33641	9.48071e-08	3.66259e-06	Down	B1_Mur4	Alu	SINE	B1_Mur4:Alu:SINE	8cWT-2cWT	2cWT-2cKO	0	0	0	0	0	0	0	189.194	476.426	0	0	0	937.247	0	0	0	0	0	0	0	0.246312	0	0	0	0	0	0	0	9.75712	0	144.741	91.3797	2.70584	0	0	0
B1_Mur4_dup28180	192.905	-18.634	2.73513	-6.81283	9.56945e-12	7.6248e-10	Down	B1_Mur4	Alu	SINE	B1_Mur4:Alu:SINE	8cWT-2cWT	2cWT-2cKO	0	0	0	0	0	0	0	0	805.593	0	0	3436.67	0	2539.88	14.5353	0	0	0	0	0	0	0	4.25083	8.80419	0	0	0	1.86151	0	212.365	1.0193	0	98.7633	0	0	0
B1_Mur4_dup28856	64.5555	-12.9984	2.06271	-6.30163	2.94528e-10	1.788e-08	Down	B1_Mur4	Alu	SINE	B1_Mur4:Alu:SINE	8cWT-2cWT:8cKO-2cKO	2cWT-2cKO	0	0	0	0	0	0	11.144	1166.7	554.387	0	0	0	533.261	0	0	0.109294	0	0	0.0925739	0	0	0	0	0	0	0	0	0	0.243928	0	29.5597	3.58352	0	73.6842	15.7899	0
B1_Mur4_dup33298	142.598	-18.0691	2.456	-7.35712	1.8792e-13	2.09625e-11	Down	B1_Mur4	Alu	SINE	B1_Mur4:Alu:SINE	8cWT-2cWT:8cKO-2cKO	2cWT-2cKO	0	0	0	0	0	0	0	504.519	0	0	0	194.299	4266.09	0	0	0	4.85501	0	6.20245	2.07231	0	0	0	5.89567	0	0	0	0	0	2.41324	82.5633	28.6681	0	0	76.5809	101.982
B1_Mur4_dup33548	177.349	-15.4131	2.0357	-7.57138	3.6928e-14	4.6744e-12	Down	B1_Mur4	Alu	SINE	B1_Mur4:Alu:SINE	8cWT-8cKO:8cWT-2cWT:8cKO-2cKO	2cWT-2cKO	0	0	0	0	0	0	11.144	0	1282.02	0	0	1845.84	2989.49	277.078	0	0	0	0	0	2.34861	0.246312	0	0	0	0	0	0	0.143193	0	24.1324	114.162	0.895879	1.35292	12.2807	0.789493	0
B1_Mur4_dup36991	145.34	-14.2473	2.29918	-6.19669	5.76615e-10	3.40775e-08	Down	B1_Mur4	Alu	SINE	B1_Mur4:Alu:SINE	8cWT-2cWT:8cKO-2cKO	2cWT-2cKO	0	0	0	0	0	0	3031.17	0	909.541	0	0	898.633	0	219.353	0	0	0	0	0	0.0690769	0	0	0	0.70748	0	0	0.273791	0	0	0	0	4.4794	238.114	0	71.8439	3.39941
B1_Mur4_dup40056	65.18	-17.2478	3.20094	-5.38835	7.1106e-08	2.8265e-06	Down	B1_Mur4	Alu	SINE	B1_Mur4:Alu:SINE	8cWT-2cWT	2cWT-2cKO	0	0	0	0	0	0	11.144	136.64	0	655.046	0	0	0	1477.75	8.55018	0	0	0	0	0	0	0	0	0	1.82103	0	0	0	0	0	109.065	11.6464	0	0	0	0
B1_Mus1_dup12018	93.6765	-16.3277	2.42321	-6.73803	1.60548e-11	1.24046e-09	Down	B1_Mus1	Alu	SINE	B1_Mus1:Alu:SINE	8cWT-2cWT:8cKO-2cKO	2cWT-2cKO	0	0	0	0	0	0	11.144	746.267	874.891	0	0	0	16.1594	1327.66	0	0	0	0	0	0	0	0	0	0	0	0	5.20203	0.143193	0	0	4.0772	3.58352	224.585	0	4.73696	0
B1_Mus1_dup14586	78.6162	-14.5067	2.25163	-6.44275	1.17326e-10	7.58711e-09	Down	B1_Mus1	Alu	SINE	B1_Mus1:Alu:SINE	8cWT-2cWT:8cKO-2cKO	2cWT-2cKO	0	0	0	0	0	0	11.144	178.684	1290.68	0	0	194.299	0	1027.5	0	0	0	0	0.0925739	0	0	0	0	1.25774	0	0	0	0	0	127.902	11.2123	38.5228	0	0	0	0
B1_Mus1_dup16126	67.5188	-14.365	2.15376	-6.66971	2.56307e-11	1.84042e-09	Down	B1_Mus1	Alu	SINE	B1_Mus1:Alu:SINE	8cWT-2cWT:8cKO-2cKO	2cWT-2cKO	0	0	0	0	0	0	0	0	1022.15	0	73.7243	0	64.6377	1027.5	0	4.91825	0.091604	0	0	0	0	0	0	0	0	0.146004	0	0	0	207.539	59.1194	14.3341	27.0584	1.02339	0	0
B1_Mus1_dup22271	8.43634	-4.60506	1.62138	-2.8402	0.00450851	0.0400936	Down	B1_Mus1	Alu	SINE	B1_Mus1:Alu:SINE	8cWT-2cWT	2cWT-2cKO	0	0	0	0	0	0	0	0	8.66229	0	0	194.299	0	0	4.27509	1.42083	0.183208	0.210491	1.7589	2.48677	0.246312	0	11.0521	13.5993	1.12064	0	18.8916	7.44602	22.9292	14.4795	0	0.895879	0	8.18714	0	0
B1_Mus1_dup22495	214.687	-15.4453	2.941	-5.25171	1.50692e-07	5.58939e-06	Down	B1_Mus1	Alu	SINE	B1_Mus1:Alu:SINE	8cWT-2cWT	2cWT-2cKO	0	0	0	0	0	0	0	0	0	4104.95	0	2428.74	0	1350.75	0	0.109294	0	0	0.0925739	0	0	0	2.42904	0	0	0	0	0	0	0	0	8.95879	0	0	47.3696	0
B1_Mus1_dup2516	185.465	-4.09222	1.41352	-2.89505	0.00379097	0.035167	Down	B1_Mus1	Alu	SINE	B1_Mus1:Alu:SINE	8cWT-2cWT:8cKO-2cKO	2cWT-2cKO	0	0	0	0	0	0	1482.15	283.792	2512.06	43.6697	36.8621	704.334	807.971	0	3.17578	0.327883	12.9162	0.841964	1.01831	0	1.72418	0	24.6548	0	0.980557	4.38011	3.0117	0	6.82999	207.539	238.516	62.7115	105.528	22.5146	202.9	91.784
B1_Mus1_dup26269	73.3791	-18.8809	1.98582	-9.50783	1.94689e-21	1.022e-18	Down	B1_Mus1	Alu	SINE	B1_Mus1:Alu:SINE	8cWT-2cWT	2cWT-2cKO	0	0	0	0	0	0	0	599.116	285.856	0	0	1347.95	80.7971	0	1.71004	0	0	0	1.94405	11.3977	1.72418	0.581072	8.3802	0	0.14008	50.0793	0	0	40.9799	19.3059	194.686	0	64.9402	3.07018	2.36848	0
B1_Mus1_dup30032	111.797	-16.7537	2.65089	-6.32003	2.61513e-10	1.593e-08	Down	B1_Mus1	Alu	SINE	B1_Mus1:Alu:SINE	8cWT-2cWT:8cKO-2cKO	2cWT-2cKO	0	0	0	0	0	0	0	0	814.255	0	1732.52	1420.81	0	0	0	0	4.76341	0	0	1.796	0	0	0	0.70748	0	0	0	0	0	0	1.0193	0	12.1763	72.6608	75.7914	0
B1_Mus1_dup39312	160.309	-15.577	2.74859	-5.66726	1.45103e-08	6.67472e-07	Down	B1_Mus1	Alu	SINE	B1_Mus1:Alu:SINE	8cWT-2cWT:8cKO-2cKO	2cWT-2cKO	0	0	0	0	0	0	0	0	1316.67	0	3981.11	497.891	0	0	3.42007	0	0	0	0.0925739	0	0	0	0	0	0	0	0	0	0	0	39.7527	18.8135	0	18.4211	55.2645	0
B1_Mus1_dup43101	125.25	-15.6857	1.8464	-8.49532	1.97387e-17	4.63547e-15	Down	B1_Mus1	Alu	SINE	B1_Mus1:Alu:SINE	8cWT-2cWT:8cKO-2cKO	2cWT-2cKO	0	0	0	0	0	0	0	693.713	848.905	0	0	1942.99	16.1594	207.808	0	0	0.824436	0	0	0	0	0	0	0	0	2.19006	0.273791	0	0	19.3059	397.527	132.59	5.41169	58.3333	175.268	0
B1_Mus1_dup59831	87.982	-11.6178	2.66555	-4.3585	1.30955e-05	0.000326437	Down	B1_Mus1	Alu	SINE	B1_Mus1:Alu:SINE	8cWT-2cWT:8cKO-2cKO	2cWT-2cKO	0	0	0	0	0	0	991.816	0	0	0	0	1287.23	597.899	0	0	0	0	0	0	0	0	0	0	0	0	0.146004	0	0	0	0	2.0386	108.401	169.115	0	98.6867	0
B1_Mus1_dup60478	173.538	-12.7824	1.87225	-6.8273	8.6526e-12	6.98785e-10	Down	B1_Mus1	Alu	SINE	B1_Mus1:Alu:SINE	8cWT-2cWT:8cKO-2cKO	2cWT-2cKO	0	0	0	0	0	0	0	1271.81	0	742.385	221.173	2501.6	0	1350.75	0	0.218589	0	0	0	0	0	0	0	0.0786089	0	0	0	0	0	86.8767	217.111	16.1258	6.76461	2.04678	3.94747	0
B1_Mus1_dup61479	122.197	-17.0264	3.0037	-5.66848	1.44074e-08	6.64453e-07	Down	B1_Mus1	Alu	SINE	B1_Mus1:Alu:SINE	8cWT-2cWT	2cWT-2cKO	0	0	0	0	0	0	0	0	216.557	917.064	36.8621	0	0	3186.39	0	0	0	0	4.6287	4.21369	0	0	0	0	0	0	0	0	0	0	1.0193	153.195	1.35292	0	0	0
B1_Mus1_dup63105	52.1465	-18.4638	1.84655	-9.99906	1.53854e-23	1.09839e-20	Down	B1_Mus1	Alu	SINE	B1_Mus1:Alu:SINE	8cWT-8cKO:8cWT-2cWT	2cWT-2cKO	0	0	0	0	0	0	0	21.0216	0	43.6697	0	825.771	0	1004.41	0	0	0	0	1.01831	1.72692	0.492624	4.35804	14.4528	1.17913	0	3.06608	0	0.572771	0	0	1.0193	0.895879	0	0	2.36848	3.39941
B1_Mus1_dup64051	82.8195	-17.4544	3.19315	-5.4662	4.59784e-08	1.90843e-06	Down	B1_Mus1	Alu	SINE	B1_Mus1:Alu:SINE	8cWT-2cWT	2cWT-2cKO	0	0	0	0	0	0	0	0	60.636	262.018	0	1020.07	0	1570.11	0	0	0	0	0	3.86831	0	0	0	0	0	0	8.21373	0	0	0	78.4861	60.9198	0	0	0	0
B1_Mus1_dup65536	70.2734	-12.0422	2.60453	-4.62356	3.77213e-06	0.000106314	Down	B1_Mus1	Alu	SINE	B1_Mus1:Alu:SINE	8cWT-2cWT:8cKO-2cKO	2cWT-2cKO	0	0	0	0	0	0	0	0	666.996	0	995.278	765.053	0	0	0	0	0	0	0	0	0	0.290536	0	0	0	0	0	0	0	0	0	34.9393	0	35.8187	3.15797	98.5828
B1_Mus1_dup66907	314.979	-17.0545	2.48824	-6.85401	7.18062e-12	5.96092e-10	Down	B1_Mus1	Alu	SINE	B1_Mus1:Alu:SINE	8cWT-2cWT:8cKO-2cKO	2cWT-2cKO	0	0	0	0	0	0	0	0	2148.25	0	0	4153.14	0	4756.5	0	0	0	0	0	0	0	0.871608	0.242904	0	0	0	0	0	8.04963	67.5708	0	0	1.35292	79.8246	310.271	118.979
B1_Mus1_dup71154	11.8738	-4.89996	1.69048	-2.89855	0.00374889	0.0348804	Down	B1_Mus1	Alu	SINE	B1_Mus1:Alu:SINE	8cWT-2cWT	2cWT-2cKO	0	0	0	0	0	0	0	0	8.66229	0	36.8621	0	0	11.5449	9.4052	0.218589	19.5116	10.735	0	13.6772	3.44837	27.0199	12.0238	8.33254	0	0.146004	0	0.429578	0	0	83.5826	3.58352	0	123.83	66.3174	0
B1_Mus1_dup7154	106.597	-15.6963	3.07625	-5.1024	3.3537e-07	1.15109e-05	Down	B1_Mus1	Alu	SINE	B1_Mus1:Alu:SINE	8cWT-2cWT:8cKO-2cKO	2cWT-2cKO	0	0	0	0	0	0	0	0	0	0	1400.76	0	630.218	1523.93	0	0	0	0	0	0	0	0	3.27921	0	0	0	0	0	0	0	0	12.5423	0	133.041	2.36848	237.958
B1_Mus1_dup73062	36.4448	-12.5345	2.00746	-6.24398	4.26574e-10	2.53783e-08	Down	B1_Mus1	Alu	SINE	B1_Mus1:Alu:SINE	8cWT-2cWT:8cKO-2cKO	2cWT-2cKO	0	0	0	0	0	0	156.016	399.411	424.452	0	0	279.305	0	0	0	0	0	0	0	0	0	0	0	0	0	0	0	0.286386	0	2.41324	7.1351	34.9393	0	0	7.10544	37.3935
B1_Mus1_dup73599	63.6758	-16.4179	2.62875	-6.24551	4.2242e-10	2.52152e-08	Down	B1_Mus1	Alu	SINE	B1_Mus1:Alu:SINE	8cWT-2cWT:8cKO-2cKO	2cWT-2cKO	0	0	0	0	0	0	0	588.605	0	0	221.173	947.208	0	438.706	0	0	5.67945	0	0	0	0	0	0	0	0	0.146004	0	0	0	0	115.181	24.1887	0	14.3275	0.789493	0
B1_Mus1_dup76430	439.374	-16.3203	3.05991	-5.33359	9.62901e-08	3.70385e-06	Down	B1_Mus1	Alu	SINE	B1_Mus1:Alu:SINE	8cWT-2cWT:8cKO-2cKO	2cWT-2cKO	0	0	0	0	0	0	0	1313.85	0	3100.55	11279.8	0	16.1594	0	0	0	0.091604	0	0	0	0.246312	0	0	0	0	0	5.20203	0	0	427.144	0	113.777	0	0	0	0
B1_Mus1_dup78203	193.668	-17.8142	2.59718	-6.85903	6.9328e-12	5.83663e-10	Down	B1_Mus1	Alu	SINE	B1_Mus1:Alu:SINE	8cWT-2cWT	2cWT-2cKO	0	0	0	0	0	0	0	0	1342.66	0	3723.08	1092.93	0	831.233	0	0	5.58784	0	0	0	0	0	0	0	1.54088	2.19006	6.0234	0	0.975712	0	136.586	0	0	0	0	0
B1_Mus1_dup79509	113.938	-12.2991	1.87324	-6.56569	5.17916e-11	3.5553e-09	Down	B1_Mus1	Alu	SINE	B1_Mus1:Alu:SINE	8cWT-2cWT:8cKO-2cKO	2cWT-2cKO	0	0	0	0	0	0	0	157.662	2910.53	0	368.621	0	274.71	57.7245	0	0	0	0	0	0	0	0	0.121452	0.0786089	0	0	0	0	0	231.671	23.4439	0	1.35292	95.1755	67.1069	0
B1_Mus1_dup81254	67.4937	-14.7743	2.57614	-5.73507	9.74746e-09	4.66415e-07	Down	B1_Mus1	Alu	SINE	B1_Mus1:Alu:SINE	8cWT-2cWT:8cKO-2cKO	2cWT-2cKO	0	0	0	0	0	0	1080.97	0	580.374	0	0	692.191	0	11.5449	0	0.218589	0	0	0	0	0	0	0	0	0	0	0	0	1.46357	0	35.6755	47.4816	47.3523	0	0	0
B1_Mus1_dup83084	50.4848	-13.1325	2.27815	-5.76455	8.18759e-09	3.9818e-07	Down	B1_Mus1	Alu	SINE	B1_Mus1:Alu:SINE	8cWT-2cWT:8cKO-2cKO	2cWT-2cKO	0	0	0	0	0	0	0	0	0	0	0	437.173	0	1062.13	0	0	0	0.210491	0	0	0	0	0.121452	0	0.14008	0	0	0	0	144.795	64.2159	0	0	15.3509	52.1066	0
B1_Mus1_dup84178	241.854	-18.1795	2.43426	-7.46818	8.13098e-14	9.61071e-12	Down	B1_Mus1	Alu	SINE	B1_Mus1:Alu:SINE	8cWT-2cWT:8cKO-2cKO	2cWT-2cKO	0	0	0	0	0	0	33.432	1429.47	1992.33	0	1363.9	3375.95	0	253.988	0	0	1.00764	0	0	0	0	0.290536	21.8614	0	0	0	0.273791	0	0	260.63	155.953	0	59.5286	0	0	0
B1_Mus1_dup84241	397.587	-16.4431	2.91656	-5.63783	1.72203e-08	7.78098e-07	Down	B1_Mus1	Alu	SINE	B1_Mus1:Alu:SINE	8cWT-8cKO:8cWT-2cWT	2cWT-2cKO	0	0	0	0	0	0	0	430.943	1888.38	0	7925.36	2586.61	1842.17	0	0	0	0	0	0	0	0	0	0	0	0	0	0	0	4.87856	0	1.0193	31.3558	0	0	0	0
B1_Mus1_dup86702	76.51	-18.8823	2.1744	-8.68392	3.82363e-18	1.00359e-15	Down	B1_Mus1	Alu	SINE	B1_Mus1:Alu:SINE	8cWT-2cWT	2cWT-2cKO	0	0	0	0	0	0	1783.04	630.648	95.2852	0	0	194.299	0	0	2.32076	4.69966	0	0	0	0.0690769	0	0	0	0	5.74326	0	6.0234	0.859157	15.1235	0	10.193	30.4599	0	0	52.1066	0
B1_Mus1_dup86781	152.707	-15.5424	3.27692	-4.74299	2.1059e-06	6.28529e-05	Down	B1_Mus1	Alu	SINE	B1_Mus1:Alu:SINE	8cWT-2cWT:8cKO-2cKO	2cWT-2cKO	0	0	0	0	0	0	0	483.497	0	174.679	0	1445.1	0	3359.57	0	0	0	0	0	0	0	0	0	0	2.94167	0	0	0	0	0	0	96.7549	0	0	87.6338	0
B1_Mus1_dup87868	132.94	-15.413	2.21965	-6.9439	3.81431e-12	3.421e-10	Down	B1_Mus1	Alu	SINE	B1_Mus1:Alu:SINE	8cWT-8cKO:8cWT-2cWT:8cKO-2cKO	2cWT-2cKO	0	0	0	0	0	0	0	52.554	476.426	0	1843.11	1602.97	840.29	0	0	0.109294	0	0	0	0	0.246312	0	0	0	0	1.75205	0.547582	0	0	2.41324	94.7949	3.58352	0	0	0	0
B1_Mus1_dup92550	33.6321	-11.7578	2.05434	-5.72339	1.04417e-08	4.95647e-07	Down	B1_Mus1	Alu	SINE	B1_Mus1:Alu:SINE	8cWT-2cWT:8cKO-2cKO	2cWT-2cKO	0	0	0	0	0	0	66.864	0	675.659	0	0	0	0	288.623	0	0	0	0.210491	0	0	0	0	0	0	0	0	0	0	0	0	35.6755	4.4794	73.0578	22.5146	3.94747	0
B1_Mus1_dup93098	92.8383	-11.3522	2.40481	-4.72062	2.35127e-06	6.90374e-05	Down	B1_Mus1	Alu	SINE	B1_Mus1:Alu:SINE	8cWT-2cWT:8cKO-2cKO	2cWT-2cKO	0	0	0	0	0	0	334.32	1156.19	1212.72	0	258.035	0	0	0	0	0	0	0	0.0925739	0	0	0	0	0	0	0	0	0	0	0	267.057	15.2299	0	163.743	27.6323	0
B1_Mus2_dup12589	74.7269	-16.6248	3.19797	-5.19856	2.00838e-07	7.24154e-06	Down	B1_Mus2	Alu	SINE	B1_Mus2:Alu:SINE	8cWT-2cWT:8cKO-2cKO	2cWT-2cKO	0	0	0	0	0	0	55.72	94.5972	0	0	0	1190.08	904.928	126.994	0	0	3.38935	0	0	0	0	0	0	0	0	3.06608	0	0	0	386.119	0	0	0	0	0	0
B1_Mus2_dup14755	76.7769	-19.5544	2.22176	-8.80132	1.3522e-18	3.83081e-16	Down	B1_Mus2	Alu	SINE	B1_Mus2:Alu:SINE	8cWT-8cKO:8cWT-2cWT	2cWT-2cKO	0	0	0	0	0	0	0	136.64	2408.12	0	0	0	210.073	23.0898	2.19862	4.69966	13.7406	0.210491	2.1292	7.32215	0.246312	0	0	0	0	0	28.2005	0	0	0	4.0772	0	0	0	0	0
B1_Mus2_dup1581	7.24315	-4.95713	1.42579	-3.47675	0.000507527	0.00764349	Down	B1_Mus2	Alu	SINE	B1_Mus2:Alu:SINE	NA	2cWT-2cKO	1.16685	0	0	0	0	1.17156	0	0	0	0	0	12.1437	0	0	31.7578	33.6627	12.3665	14.1029	47.3978	8.49646	0	0	17.4891	10.1405	33.8993	4.38011	4.65445	0.143193	13.66	0	0	0.895879	0	20.4678	0	0
B1_Mus2_dup16363	74.9922	-16.4987	3.1808	-5.18697	2.13747e-07	7.58439e-06	Down	B1_Mus2	Alu	SINE	B1_Mus2:Alu:SINE	8cWT-2cWT:8cKO-2cKO	2cWT-2cKO	0	0	0	0	0	0	0	0	1524.56	87.3395	0	789.34	0	11.5449	0	0	0	0	0	0	0	0	0	0	0	0	6.0234	0	0	106.183	109.065	140.653	0	0	0	0
B1_Mus2_dup18780	3.88271	-5.35329	1.93268	-2.76987	0.0056078	0.0467544	Down	B1_Mus2	Alu	SINE	B1_Mus2:Alu:SINE	NA	2cWT-2cKO:8cKO-2cKO	0	0	0	0	0	0	0	0	0	0	0	0	0	0	8.18375	35.3021	14.8398	4.84129	15.7376	18.5817	0	36.317	0	3.45879	0.14008	0	0	6.0141	0.243928	0	0	0	0	0	0	0
B1_Mus2_dup20947	47.111	-13.0138	2.41894	-5.37998	7.44951e-08	2.94809e-06	Down	B1_Mus2	Alu	SINE	B1_Mus2:Alu:SINE	8cWT-2cWT:8cKO-2cKO	2cWT-2cKO	0	0	0	0	0	0	0	0	294.518	0	0	461.46	0	704.239	0	0	0.183208	0	0.185148	0	0	0	0	0	0	0	0	0	0	0	61.158	171.113	0	0	18.1583	0
B1_Mus2_dup22832	43.1847	-12.0505	2.54916	-4.72725	2.27581e-06	6.71382e-05	Down	B1_Mus2	Alu	SINE	B1_Mus2:Alu:SINE	8cWT-2cWT:8cKO-2cKO	2cWT-2cKO	0	0	0	0	0	0	133.728	0	762.282	0	0	534.323	0	0	0	0	0	0	0	0	0	0	0	0.157218	0	0	0	0	0	33.7854	3.0579	61.8157	0	0	68.6859	0
B1_Mus2_dup24797	95.9831	-17.6364	4.06554	-4.33803	1.43768e-05	0.000355891	Down	B1_Mus2	Alu	SINE	B1_Mus2:Alu:SINE	8cWT-2cWT	2cWT-2cKO	0	0	0	0	0	0	0	1156.19	0	0	626.656	947.208	0	0	0	0	0	0	0	0	0	0	0	0	0	0	0	0	14.3918	0	0	0	286.819	0	0	520.109
B1_Mus2_dup25351	75.1713	-16.8533	3.08901	-5.45587	4.87331e-08	2.00412e-06	Down	B1_Mus2	Alu	SINE	B1_Mus2:Alu:SINE	8cWT-8cKO:8cWT-2cWT	2cWT-2cKO	0	0	0	0	0	0	0	315.324	0	0	0	1165.79	549.42	738.874	0	0	6.41228	0	0	4.49	0	0	0	0	0	0	0	0	0	0	0	0	0	1.02339	0	0
B1_Mus2_dup31386	336.407	-14.0288	1.6909	-8.29664	1.071e-16	2.2227e-14	Down	B1_Mus2	Alu	SINE	B1_Mus2:Alu:SINE	8cWT-8cKO:8cWT-2cWT:8cKO-2cKO	2cWT-2cKO	0	0	0	0	0	0	1716.18	630.648	2659.32	1222.75	1363.9	182.155	1842.17	2551.42	0	0	0	0	0	0	0.246312	0.290536	0.364356	0.0786089	0	0	0	0	0	125.489	0	0	147.468	0	0	0
B1_Mus2_dup34596	61.1837	-14.3856	2.34168	-6.14329	8.08314e-10	4.62397e-08	Down	B1_Mus2	Alu	SINE	B1_Mus2:Alu:SINE	8cWT-2cWT:8cKO-2cKO	2cWT-2cKO	0	0	0	0	0	0	1047.54	0	233.882	0	0	631.472	0	0	0	0.218589	0	0	0.925739	0	0	0	0	0	0	0	0	0	0	123.075	81.544	48.3775	6.76461	0	90.0022	0
B1_Mus2_dup35672	14.3923	-21.1221	2.50458	-8.43339	3.35782e-17	7.65399e-15	Down	B1_Mus2	Alu	SINE	B1_Mus2:Alu:SINE	8cWT-2cWT	2cWT-2cKO	0	0	0	0	0	0	0	0	17.3246	0	0	12.1437	0	0	0	0.109294	0	0	0	6.21692	0.738936	0.290536	0	0.0786089	0	172.577	0	0	0	0	2.0386	47.4816	16.2351	179.094	0	78.1863
B1_Mus2_dup36865	57.6384	-18.4364	2.7643	-6.66945	2.56759e-11	1.84042e-09	Down	B1_Mus2	Alu	SINE	B1_Mus2:Alu:SINE	8cWT-2cWT	2cWT-2cKO	0	0	0	0	0	0	0	1082.61	684.321	0	36.8621	0	0	0	0	11.0387	0.549624	0	0.0925739	0	0	0	0	0	0	0	0	0	13.66	2.41324	1.0193	0	183.997	0	116.056	0
B1_Mus2_dup43592	189.658	-13.5561	2.59184	-5.23028	1.6925e-07	6.1901e-06	Down	B1_Mus2	Alu	SINE	B1_Mus2:Alu:SINE	8cWT-2cWT:8cKO-2cKO	2cWT-2cKO	0	0	0	0	0	0	456.904	893.418	103.948	0	0	0	775.652	4525.6	0	0	0	0	0	0	0	0	0	0	0	0.584015	0	0.143193	0	26.5457	0	0	0	0	0	234.559
B1_Mus2_dup48849	159.699	-9.86628	2.07379	-4.7576	1.95909e-06	5.87663e-05	Down	B1_Mus2	Alu	SINE	B1_Mus2:Alu:SINE	8cWT-8cKO:8cWT-2cWT:8cKO-2cKO	2cWT-2cKO	0	0	0	0	0	0	22.288	0	606.36	0	884.691	4335.3	0	0	0	0	0	0	0	0	0	0	0	0.70748	0	0.146004	0	0	0	2.41324	18.3474	8.95879	14.8821	1.02339	0	0
B1_Mus2_dup51009	136.742	-13.8499	2.25429	-6.14377	8.05849e-10	4.62397e-08	Down	B1_Mus2	Alu	SINE	B1_Mus2:Alu:SINE	8cWT-2cWT:8cKO-2cKO	2cWT-2cKO	0	0	0	0	0	0	55.72	0	1074.12	0	0	1165.79	0	2597.6	0	0	0	0.210491	0	0	0	0	0	0	0	0	3.55928	0	0.243928	9.65297	0	10.7505	94.7045	9.21053	37.8957	0
B1_Mus2_dup53491	101.8	-15.6544	2.8315	-5.52867	3.22677e-08	1.37122e-06	Down	B1_Mus2	Alu	SINE	B1_Mus2:Alu:SINE	8cWT-2cWT:8cKO-2cKO	2cWT-2cKO	0	0	0	0	0	0	624.064	0	519.738	0	36.8621	1153.65	0	1119.86	0	0	0	0	0	0	0	0	3.15776	0	0	0	0	0	0	0	0	1.79176	304.407	3.07018	0	0
B1_Mus2_dup54550	225.279	-11.505	2.20006	-5.22941	1.70049e-07	6.20661e-06	Down	B1_Mus2	Alu	SINE	B1_Mus2:Alu:SINE	8cWT-2cWT:8cKO-2cKO	2cWT-2cKO	0	0	0	0	0	0	624.064	430.943	8.66229	0	5713.63	1177.94	16.1594	80.8144	0	0	0	0	0	0	0	0	0	0	0	0.146004	0	0	0	183.406	0	94.9632	0	0	0	0
B1_Mus2_dup64071	146.226	-15.292	2.28258	-6.69946	2.09188e-11	1.56217e-09	Down	B1_Mus2	Alu	SINE	B1_Mus2:Alu:SINE	8cWT-2cWT:8cKO-2cKO	2cWT-2cKO	0	0	0	0	0	0	2407.1	0	580.374	131.009	0	12.1437	96.9565	1881.82	0	0	0	0.420982	0	0	0	0	1.82178	0	0	0.146004	0	0	0	0	148.818	0	0	146.345	0	3.39941
B1_Mus2_dup6530	109.729	-4.99538	1.69218	-2.95204	0.00315685	0.0306715	Down	B1_Mus2	Alu	SINE	B1_Mus2:Alu:SINE	8cWT-2cWT:8cKO-2cKO	2cWT-2cKO	0	0.511321	0	0	0	0	0	756.778	8.66229	0	0	1432.96	177.754	1281.48	1.09931	3.38813	4.39699	26.3114	6.94304	3.66108	0	0	5.22244	0.628871	0	0	12.0468	0	2.19535	0	132.509	65.3992	1.35292	4.09357	0	132.577
B1_Mus2_dup65357	4.67655	-4.93724	1.5496	-3.18615	0.00144181	0.0172892	Down	B1_Mus2	Alu	SINE	B1_Mus2:Alu:SINE	NA	2cWT-2cKO	0	0	0	2.77932	0	0	0	0	0	0	0	0	0	0	59.9734	4.69966	3.29774	7.36718	1.57376	0.967077	13.5472	0	5.34389	3.69462	0	0	6.29719	34.2231	13.9039	2.41324	0	2.68764	0	0	10.2634	0
B1_Mus2_dup69973	54.4814	-16.05	2.83537	-5.66065	1.50805e-08	6.88379e-07	Down	B1_Mus2	Alu	SINE	B1_Mus2:Alu:SINE	8cWT-2cWT:8cKO-2cKO	2cWT-2cKO	0	0	0	0	0	0	111.44	472.986	259.869	611.376	0	12.1437	0	334.802	0	0	0	0	0	0	0	0	0	1.02192	0	4.23411	0	0	0	0	207.937	0	0	0	0	0
B1_Mus2_dup70374	131.175	-17.6659	2.56279	-6.89325	5.45318e-12	4.72468e-10	Down	B1_Mus2	Alu	SINE	B1_Mus2:Alu:SINE	8cWT-2cWT:8cKO-2cKO	2cWT-2cKO	0	0	0	0	0	0	0	0	1559.21	43.6697	884.691	1736.55	0	0	0.122145	0	0	0	9.07224	0	0	0	0.121452	0.157218	7.00398	0	0	0	0	0	91.737	0	0	245.614	275.533	0
B1F_dup12467	104.725	-19.1143	2.7878	-6.85641	7.06148e-12	5.8894e-10	Down	B1F	Alu	SINE	B1F:Alu:SINE	8cWT-2cWT	2cWT-2cKO	0	0	0	0	0	0	0	578.094	0	0	2322.31	546.466	0	0	23.8184	2.62307	0	0	5.55443	9.80892	0.246312	0	0	0	0	0.146004	0	0	0	0	275.211	0	0	110.526	0	0
B1F_dup20668	40.2331	-18.3197	2.8296	-6.47429	9.52585e-11	6.25064e-09	Down	B1F	Alu	SINE	B1F:Alu:SINE	8cWT-8cKO:8cWT-2cWT	2cWT-2cKO:8cKO-2cKO	0	0	0	0	0	0	523.768	73.5756	554.387	0	0	0	0	311.713	4.27509	0	2.56491	0	6.3876	0	0	0	0	0	0	0	0	0	11.9525	0	0	0	0	0	0	0
B1F_dup31852	160.761	-14.8675	1.83155	-8.11742	4.76181e-16	8.41473e-14	Down	B1F	Alu	SINE	B1F:Alu:SINE	8cWT-8cKO:8cWT-2cWT:8cKO-2cKO	2cWT-2cKO	0	0	0	0	0	0	267.456	52.554	1152.08	0	810.967	801.484	16.1594	2586.06	0	0	0	0.210491	0	0	0.246312	0	0	0	0	0	1.09516	0.143193	0.243928	0	167.165	25.9805	0	0	66.3174	0
B1F_dup44806	157.48	-18.6556	3.43179	-5.43611	5.44549e-08	2.22405e-06	Down	B1F	Alu	SINE	B1F:Alu:SINE	8cWT-2cWT	2cWT-2cKO	0	0	0	0	0	0	0	0	277.193	0	3944.25	1105.08	16.1594	323.257	0	0	0	0	0	0	0.246312	0	0	0	0	0	30.117	0	0	0	130.47	0	0	0	0	0
B1F_dup7057	8.30856	-18.4706	2.70459	-6.82935	8.5303e-12	6.9204e-10	Down	B1F	Alu	SINE	B1F:Alu:SINE	8cWT-2cWT	2cWT-2cKO	0	0	0	0	0	0	0	84.0864	8.66229	0	0	0	0	0	0	0	2.10689	0	21.1069	0.0690769	0	0	0.364356	9.19724	0	0	14.2371	0	0	0	320.06	0	185.35	0	3.15797	0
B1F1_dup10175	322.267	-15.3143	2.41715	-6.33567	2.36306e-10	1.44935e-08	Down	B1F1	Alu	SINE	B1F1:Alu:SINE	8cWT-8cKO:8cWT-2cWT:8cKO-2cKO	2cWT-2cKO	0	0	0	0	0	0	33.432	0	216.557	0	7372.43	4104.57	0	57.7245	0.122145	0	0	0	0	0	0	0.871608	0	0	12.4671	0	1.09516	0	0	0	62.1773	74.358	0	0	0	0
B1F1_dup10587	332.569	-11.9119	2.26826	-5.25157	1.50804e-07	5.58939e-06	Down	B1F1	Alu	SINE	B1F1:Alu:SINE	8cWT-2cWT:8cKO-2cKO	2cWT-2cKO	0	0	0	0	0	0	11.144	2081.14	658.334	43.6697	7114.39	0	0	1916.45	0	0	0	0	0	0	0	0	0	0	0	0	0.273791	0	0	0	371.025	103.026	0	1.02339	0	0
B1F1_dup13818	208.957	-18.7193	2.3594	-7.9339	2.12376e-15	3.38436e-13	Down	B1F1	Alu	SINE	B1F1:Alu:SINE	8cWT-2cWT	2cWT-2cKO	0	0	0	0	0	0	0	31.5324	0	0	5566.18	1177.94	64.6377	692.694	0	0	0	0	0	1.17431	0	0.290536	0.121452	16.1934	0	12.9943	0	0	0	0	0	154.091	5.41169	0	4.73696	3.39941
B1F1_dup3845	93.5209	-15.9906	1.93018	-8.28451	1.18593e-16	2.40527e-14	Down	B1F1	Alu	SINE	B1F1:Alu:SINE	8cWT-2cWT:8cKO-2cKO	2cWT-2cKO	0	0	0	0	0	0	0	472.986	0	0	110.586	12.1437	0	2216.62	0	0.109294	0	0.420982	0	0	23.8923	0	0	0.0786089	0	0.584015	0	0	0.975712	7.23973	398.546	106.61	0	19.4444	107.371	0
B1F1_dup6906	63.7396	-14.3808	2.24539	-6.4046	1.50765e-10	9.576e-09	Down	B1F1	Alu	SINE	B1F1:Alu:SINE	8cWT-2cWT:8cKO-2cKO	2cWT-2cKO	0	0	0	0	0	0	0	0	95.2852	0	331.759	0	1502.83	265.533	0	0	0.183208	0	0	0	0	0	0	0	0	0	0	1.00235	0	2.41324	0	0.895879	17.588	15.3509	125.529	0
PB1D10_dup30071	7.9838	-16.552	2.89252	-5.72234	1.05066e-08	4.9699e-07	Down	PB1D10	Alu	SINE	PB1D10:Alu:SINE	8cWT-2cWT:8cKO-2cKO	2cWT-2cKO	0	0	0	0	0	0	0	42.0432	0	0	0	0	16.1594	0	0	0	0	0.210491	4.72127	0	0	22.6618	1.21452	0	0	0	0	0	0	0	218.13	2.68764	0	10.2339	0	550.704
PB1D10_dup40560	91.9959	-18.2748	3.16144	-5.78055	7.44586e-09	3.63098e-07	Down	PB1D10	Alu	SINE	PB1D10:Alu:SINE	8cWT-2cWT	2cWT-2cKO	0	0	0	0	0	0	0	199.705	1169.41	0	0	0	16.1594	1801.01	0	0	0	4.84129	0	0.0690769	0	0	0	0	0	0	17.7964	0	0	0	0	193.51	1.35292	0	0	0
PB1D10_dup62721	97.2655	-17.2459	2.31024	-7.46497	8.33174e-14	9.78322e-12	Down	PB1D10	Alu	SINE	PB1D10:Alu:SINE	8cWT-8cKO:8cWT-2cWT	2cWT-2cKO	0	0	0	0	0	0	913.808	0	0	0	0	1493.67	0	1154.49	0.977164	1.85801	0	0	0	0	0.492624	0.581072	0	0	0	0	0	0	6.58606	2.41324	1.0193	16.1258	0	0	0	6.79881
PB1D11_dup12824	43.4779	-17.2628	3.49159	-4.94412	7.64903e-07	2.45539e-05	Down	PB1D11	Alu	SINE	PB1D11:Alu:SINE	8cWT-8cKO:8cWT-2cWT	2cWT-2cKO:8cKO-2cKO	0	0	0	0	0	0	0	31.5324	0	4104.95	0	1566.54	0	0	0	0	0.45802	0	0	0	5.66517	0	22.1043	4.24488	0	0	0	0	0.243928	0	0	0	0	28.655	0	0
PB1D7_dup304	50.2688	-17.8565	2.83396	-6.3009	2.9592e-10	1.79036e-08	Down	PB1D7	Alu	SINE	PB1D7:Alu:SINE	8cWT-8cKO:8cWT-2cWT	2cWT-2cKO:8cKO-2cKO	0	0	0	0	0	0	222.88	10.5108	0	0	0	1080.79	0	531.066	0	7.10414	3.93897	0	0	0	0	0	0.242904	0	0	0	0	0	3.41499	0	0	0	0	0	0	0
PB1D9_dup10838	143.342	-19.0531	2.78808	-6.83375	8.27223e-12	6.74168e-10	Down	PB1D9	Alu	SINE	PB1D9:Alu:SINE	8cWT-2cWT	2cWT-2cKO	0	0	0	0	0	0	546.056	0	112.61	0	4128.56	0	403.986	0	0.244291	0	0	0	0	0.0690769	0	39.5129	0	0	0	0	0	0.572771	0	0	0	29.564	37.8818	0	0	0
PB1D9_dup11323	135.435	-19.7648	2.34798	-8.41779	3.83645e-17	8.55913e-15	Down	PB1D9	Alu	SINE	PB1D9:Alu:SINE	8cWT-2cWT	2cWT-2cKO	0	0	0	0	0	0	0	0	0	0	0	655.759	2359.28	1731.74	4.15295	0	10.7177	0	0	11.8812	33.7447	0	0	10.3764	0.14008	22.0466	12.0468	0	0	0	153.914	0	1.35292	0	3.94747	0
PB1D9_dup11849	183.095	-13.7496	2.55795	-5.37523	7.64847e-08	3.00683e-06	Down	PB1D9	Alu	SINE	PB1D9:Alu:SINE	8cWT-2cWT:8cKO-2cKO	2cWT-2cKO	0	0	0	0	0	0	0	945.972	926.865	0	2690.94	1870.13	0	34.6347	0	0	0	0	0	0	0	0	0	0.70748	0	0	0	0	0	0	172.262	76.1497	0	0	56.8435	0
PB1D9_dup16646	40.4117	-18.9519	2.30822	-8.21063	2.20026e-16	4.2685e-14	Down	PB1D9	Alu	SINE	PB1D9:Alu:SINE	8cWT-2cWT:8cKO-2cKO	2cWT-2cKO	0	0	0	0	0	0	0	0	0	0	0	607.185	0	0	0	0.109294	4.39699	0	0	3.73015	0	0.290536	2.18614	9.19724	0.14008	0.146004	0	0.143193	16.831	0	402.623	0	0	144.298	303.955	0
PB1D9_dup20120	208.353	-16.1769	2.65034	-6.10372	1.03631e-09	5.8347e-08	Down	PB1D9	Alu	SINE	PB1D9:Alu:SINE	8cWT-2cWT:8cKO-2cKO	2cWT-2cKO	0	0	0	0	0	0	178.304	861.886	0	0	5529.32	813.627	0	115.449	0.366436	0	0	0	0	0	0	0	0.121452	0	0	0	0	4.15259	0	0	79.5054	126.319	0	0	0	0
PB1D9_dup21813	206.941	-17.2834	3.07929	-5.61279	1.9909e-08	8.90567e-07	Down	PB1D9	Alu	SINE	PB1D9:Alu:SINE	8cWT-8cKO:8cWT-2cWT	2cWT-2cKO	0	0	0	0	0	0	0	0	2927.85	0	4570.91	0	0	126.994	0	0	2.47331	6.9462	0	0	0	0	0	0	0	1.46004	0	0	0	0	0	18.8135	1.35292	0	0	0
PB1D9_dup23302	76.0134	-18.0623	2.69761	-6.69568	2.14675e-11	1.58985e-09	Down	PB1D9	Alu	SINE	PB1D9:Alu:SINE	8cWT-2cWT	2cWT-2cKO	0	0	0	0	0	0	0	725.246	147.259	0	0	0	0	1639.38	0	0	0.091604	0.210491	0	0	0	8.71608	0	0	0	0	10.4041	0	0	195.473	68.2931	0	0	7.16374	10.2634	0
PB1D9_dup25445	141.593	-18.6611	2.42516	-7.6948	1.4172e-14	1.93086e-12	Down	PB1D9	Alu	SINE	PB1D9:Alu:SINE	8cWT-8cKO:8cWT-2cWT	2cWT-2cKO	0	0	0	0	0	0	2518.54	0	0	0	0	1590.82	0	1096.77	2.93149	4.80896	1.28246	0	0	0	0	0	14.5743	0	1.68096	0.292008	0	0	0	0	4.0772	0	0	0	3.15797	0
PB1D9_dup26774	101.47	-13.6981	2.2993	-5.95751	2.56105e-09	1.35236e-07	Down	PB1D9	Alu	SINE	PB1D9:Alu:SINE	8cWT-2cWT:8cKO-2cKO	2cWT-2cKO	0	0	0	0	0	0	0	157.662	303.18	0	0	3120.93	16.1594	0	0	0	2.83972	0	0	0	0.985248	0	0	0	1.68096	0	0	0	0	0	0	78.8374	32.4701	23.538	2.36848	0
PB1D9_dup28098	80.635	-16.9059	2.82042	-5.99412	2.04591e-09	1.09656e-07	Down	PB1D9	Alu	SINE	PB1D9:Alu:SINE	8cWT-2cWT:8cKO-2cKO	2cWT-2cKO	0	0	0	0	0	0	0	105.108	233.882	0	73.7243	2258.73	0	11.5449	0	0	0	0	6.94304	0	0.985248	0	0	0	0	0	0	0.143193	0	275.11	17.3281	0	0	0	0	0
PB1D9_dup4405	78.5151	-19.5098	2.70287	-7.21818	5.26894e-13	5.53176e-11	Down	PB1D9	Alu	SINE	PB1D9:Alu:SINE	8cWT-8cKO:8cWT-2cWT	2cWT-2cKO	0	0	0	0	0	0	0	630.648	0	262.018	0	36.4311	0	1916.45	0	0	0	0	0	2.00323	0	0	0	0.0786089	15.1286	22.7766	0	0	16.831	0	0	2.68764	0	0	0	0
PB1D9_dup4556	75.338	-19.1091	2.25763	-8.46422	2.57864e-17	5.97708e-15	Down	PB1D9	Alu	SINE	PB1D9:Alu:SINE	8cWT-2cWT:8cKO-2cKO	2cWT-2cKO	0	0	0	0	0	0	601.776	851.375	138.597	0	0	0	0	496.431	0	0.327883	0.274812	0	6.57275	0.0690769	0	0	0	16.5079	0	18.2505	0	0	1.46357	460.929	1.0193	0	0	0	184.741	0
PB1D9_dup7378	326.781	-15.2568	2.17828	-7.00405	2.48667e-12	2.28774e-10	Down	PB1D9	Alu	SINE	PB1D9:Alu:SINE	8cWT-8cKO:8cWT-2cWT:8cKO-2cKO	2cWT-2cKO	0	0	0	0	0	0	167.16	1156.19	623.685	0	9805.33	133.581	0	11.5449	0	0	0	0	1.66633	0	0.246312	0	0	0	0.14008	0	0	0	0.243928	9.65297	0	0	0	0	161.057	20.3964
B2_Mm1a_dup10635	11.0959	-5.99038	1.93981	-3.08813	0.00201423	0.0223292	Down	B2_Mm1a	B2	SINE	B2_Mm1a:B2:SINE	NA	2cWT-2cKO	0	0	0	0	0	0	0	0	0	0	0	1542.25	0	0	14.0467	17.7057	18.5956	0	0.0925739	26.5946	0	23.2429	0	5.81706	45.666	56.2115	5.20203	0	10.245	183.406	2.0386	0.895879	0	0	0.789493	241.358
B2_Mm1a_dup10810	45.6512	-17.9788	2.62368	-6.85253	7.25542e-12	5.9675e-10	Down	B2_Mm1a	B2	SINE	B2_Mm1a:B2:SINE	8cWT-2cWT	2cWT-2cKO	0	0	0	0	0	0	0	0	199.233	0	0	1117.22	258.551	23.0898	0.244291	0	0	17.2603	0	0	0	0	0	0.0786089	0	0.292008	0	0	0	0	0	20.6052	0	49.1228	0	3.39941
B2_Mm1a_dup11133	35.8569	-16.2843	1.58638	-10.2651	1.01267e-24	9.03708e-22	Down	B2_Mm1a	B2	SINE	B2_Mm1a:B2:SINE	8cWT-8cKO:8cWT-2cWT:8cKO-2cKO	2cWT-2cKO	0	0	0	0	0	0	679.784	0	259.869	0	0	109.293	0	219.353	0	0	0	0.210491	0.185148	0.0690769	0.246312	0.581072	3.15776	0.0786089	0	0.584015	0	0	0	9.65297	12.2316	25.0846	1.35292	1.02339	3.94747	0
B2_Mm1a_dup11228	189.27	-4.19358	1.50088	-2.79408	0.00520477	0.04432	Down	B2_Mm1a	B2	SINE	B2_Mm1a:B2:SINE	8cWT-2cWT:8cKO-2cKO	2cWT-2cKO	0	0	0	0	0	0	267.456	21.0216	2078.95	0	3207.01	97.1495	533.261	92.3593	11.726	0.218589	4.03058	17.8917	0	6.286	0	0	4.25083	9.04002	0.14008	4.67212	0	0.143193	5.85427	168.927	189.59	171.113	89.2928	19.4444	3.15797	0
B2_Mm1a_dup11324	113.208	-5.27107	1.14336	-4.61014	4.02391e-06	0.000112923	Down	B2_Mm1a	B2	SINE	B2_Mm1a:B2:SINE	8cWT-2cWT:8cKO-2cKO	2cWT-2cKO	0	0	0	0	0	1.17156	222.88	73.5756	675.659	393.028	589.794	959.352	145.435	0	20.6426	1.42083	16.3971	5.47276	2.96237	35.2292	0	3.48643	10.8092	16.8223	2.66151	1.75205	45.1755	1.57512	28.2957	98.9429	133.528	274.139	10.8234	146.345	119.214	129.177
B2_Mm1a_dup11633	15.0951	-3.84885	1.31577	-2.92517	0.00344272	0.0327854	Down	B2_Mm1a	B2	SINE	B2_Mm1a:B2:SINE	8cWT-2cWT	2cWT-2cKO	0	1.02264	0.832132	0	0	0	11.144	42.0432	43.3115	43.6697	0	121.437	16.1594	46.1796	7.69516	1.53012	1.55727	0	12.1272	12.1575	0.492624	3.77697	0.971617	8.64698	0	63.9497	0	0.143193	0.243928	7.23973	59.1194	17.9176	5.41169	15.3509	0.789493	13.5976
B2_Mm1a_dup12395	79.1277	-13.7383	1.82623	-7.52276	5.36327e-14	6.55642e-12	Down	B2_Mm1a	B2	SINE	B2_Mm1a:B2:SINE	8cWT-2cWT:8cKO-2cKO	2cWT-2cKO	0	0	0	0	0	0	33.432	0	485.088	0	0	449.317	16.1594	1235.31	0.244291	0	0	0	0	0	0	0	0	0.157218	0	0.292008	0	0	0	154.448	190.609	126.319	212.409	1.02339	0	0
B2_Mm1a_dup12529	84.1577	-17.6576	3.274	-5.39328	6.91843e-08	2.76242e-06	Down	B2_Mm1a	B2	SINE	B2_Mm1a:B2:SINE	8cWT-2cWT	2cWT-2cKO	0	0	0	0	0	0	167.16	630.648	0	0	0	2040.14	0	0	0	0	4.6718	0	9.16482	0	0	0	0	0	0	0	0.273791	0	0	0	0	94.9632	0	166.813	0	0
B2_Mm1a_dup12827	61.0637	-17.5183	2.72024	-6.43997	1.19496e-10	7.69952e-09	Down	B2_Mm1a	B2	SINE	B2_Mm1a:B2:SINE	8cWT-2cWT	2cWT-2cKO	0	0	0	0	0	0	1270.42	0	0	0	0	449.317	436.304	0	0	0	5.03822	0	0	0	0	0	0	6.99619	0.14008	0.146004	0	0.286386	0	0	0	31.3558	0	59.3567	0	0
B2_Mm1a_dup12914	176.889	-3.27784	1.10225	-2.97378	0.00294159	0.0291396	Down	B2_Mm1a	B2	SINE	B2_Mm1a:B2:SINE	8cWT-2cWT:8cKO-2cKO	2cWT-2cKO	0	1.02264	0.832132	0	2.6429	1.17156	278.6	220.727	1481.25	436.697	995.278	340.023	96.9565	1350.75	0.366436	25.4656	11.3589	47.15	3.42523	2.00323	0.246312	0	4.49373	13.9138	0.280159	0.438011	1.36896	1.00235	20.7339	12.0662	294.578	80.6291	13.5292	369.445	42.6326	40.7929
B2_Mm1a_dup13617	166.239	-11.6391	2.05711	-5.65801	1.53137e-08	6.95467e-07	Down	B2_Mm1a	B2	SINE	B2_Mm1a:B2:SINE	8cWT-8cKO:8cWT-2cWT:8cKO-2cKO	2cWT-2cKO	0	0	0	0	0	0	111.44	0	8.66229	0	1879.97	2671.61	0	1293.03	0	0	0	0	0	0	0	0	0	0	0	0	0	0	0.243928	0	3.0579	84.2126	25.7055	49.1228	0	23.7958
B2_Mm1a_dup13816	147.153	-16.1732	2.81476	-5.74584	9.1468e-09	4.40033e-07	Down	B2_Mm1a	B2	SINE	B2_Mm1a:B2:SINE	8cWT-2cWT:8cKO-2cKO	2cWT-2cKO	0	0	0	0	0	0	0	1240.27	753.619	0	0	3120.93	96.9565	0	0	0	0	0	0	0	0	0	0	4.63792	0	0	0	0	0	0	3.0579	71.6703	0	0	126.319	27.1952
B2_Mm1a_dup13949	302.088	-4.35746	1.28067	-3.40247	0.000667786	0.00956553	Down	B2_Mm1a	B2	SINE	B2_Mm1a:B2:SINE	8cWT-8cKO:8cWT-2cWT	2cWT-2cKO	1.16685	0	1.66426	0	0	3.51469	702.072	1713.26	4478.4	0	36.8621	1542.25	1680.58	103.904	0.122145	0.218589	29.1301	5.89375	0.925739	33.5023	0.492624	0.290536	10.202	75.5431	0.14008	194.185	0.273791	4.86855	0.487856	43.4384	221.188	34.9393	18.9409	24.5614	6.31595	61.1893
B2_Mm1a_dup14099	40.1091	-16.8666	1.60104	-10.5348	5.97195e-26	5.92152e-23	Down	B2_Mm1a	B2	SINE	B2_Mm1a:B2:SINE	8cWT-2cWT:8cKO-2cKO	2cWT-2cKO	0	0	0	0	0	0	44.576	21.0216	1204.06	0	0	60.7185	0	34.6347	1.83218	0	0.274812	0	1.7589	0.345385	0	0	0	0.628871	0	0.584015	0	2.14789	0	12.0662	11.2123	5.37527	0	62.4269	15.7899	0
B2_Mm1a_dup14175	17.5518	-3.51216	1.27939	-2.74518	0.00604769	0.0492886	Down	B2_Mm1a	B2	SINE	B2_Mm1a:B2:SINE	8cWT-2cWT:8cKO-2cKO	2cWT-2cKO	0	0	0	0	0	0	22.288	21.0216	138.597	0	36.8621	97.1495	32.3188	57.7245	18.444	0.109294	0.091604	0	0.740591	1.03615	1.9705	0.290536	9.95908	1.57218	0.420239	1.46004	1.91654	0	1.95142	0	24.4632	36.731	62.2344	22.5146	0.789493	47.5917
B2_Mm1a_dup14601	64.4734	-18.3493	2.33186	-7.86893	3.57693e-15	5.50354e-13	Down	B2_Mm1a	B2	SINE	B2_Mm1a:B2:SINE	8cWT-2cWT	2cWT-2cKO	0	0	0	0	0	0	0	0	0	0	442.346	1214.37	0	577.245	0.122145	6.66696	2.56491	0	0	0	0	0	0	4.63792	0	0	0	8.87795	1.21964	0	1.0193	80.6291	0	45.0292	0.789493	0
B2_Mm1a_dup14640	103.68	-3.63323	1.28032	-2.83775	0.00454332	0.0403095	Down	B2_Mm1a	B2	SINE	B2_Mm1a:B2:SINE	8cWT-2cWT:8cKO-2cKO	2cWT-2cKO	0	2.55661	0	0	0	0	66.864	136.64	0	873.395	0	510.035	597.899	357.892	24.6734	2.0766	3.48095	0	3.79553	0	11.3303	0.581072	26.3551	20.91	4.90279	11.8263	13.9633	1.14554	0	57.9178	148.818	154.091	328.76	95.1755	95.5287	285.55
B2_Mm1a_dup15786	258.592	-17.445	1.94315	-8.97766	2.76598e-19	9.4937e-17	Down	B2_Mm1a	B2	SINE	B2_Mm1a:B2:SINE	8cWT-2cWT:8cKO-2cKO	2cWT-2cKO	0	0	0	0	0	0	0	851.375	0	0	0	3873.84	0	3682.83	0	0	0	0	0.185148	0.690769	0.246312	0	0	0.157218	0.14008	1.89805	0	0	9.5132	111.009	78.4861	96.7549	0	62.4269	19.7373	67.9881
B2_Mm1a_dup17825	91.3666	-15.9878	2.03966	-7.83843	4.56216e-15	6.86357e-13	Down	B2_Mm1a	B2	SINE	B2_Mm1a:B2:SINE	8cWT-2cWT:8cKO-2cKO	2cWT-2cKO	0	0	0	0	0	0	0	0	8.66229	0	0	2198.01	0	0	0.366436	0.109294	0.183208	0.210491	0	32.1898	0	0	0.121452	0.393044	0	0	0	0	2.19535	12.0662	518.824	420.167	0	107.456	111.319	0
B2_Mm1a_dup1798	45.6689	-14.7641	2.54906	-5.79196	6.95704e-09	3.40222e-07	Down	B2_Mm1a	B2	SINE	B2_Mm1a:B2:SINE	8cWT-2cWT	2cWT-2cKO	0	0	0	0	0	0	33.432	0	1377.3	0	0	0	0	0	5.49655	0	0	0	0	2.27954	0	0	0	5.81706	0	7.5922	0	0	0	0	89.6984	32.2516	9.47045	52.193	74.2124	0
B2_Mm1a_dup3801	334.736	-16.2129	2.02426	-8.00931	1.15351e-15	1.9241e-13	Down	B2_Mm1a	B2	SINE	B2_Mm1a:B2:SINE	8cWT-2cWT:8cKO-2cKO	2cWT-2cKO	0	0	0	0	0	0	1660.46	0	8.66229	0	9399.85	667.903	32.3188	0	0	0.327883	0.274812	0	0	0.0690769	0	0.290536	4.12937	0	0	0	0	0	0	9.65297	8.1544	180.968	0	9.21053	389.22	0
B2_Mm1a_dup4081	67.2254	-19.0475	1.74639	-10.9068	1.06983e-27	1.19339e-24	Down	B2_Mm1a	B2	SINE	B2_Mm1a:B2:SINE	8cWT-2cWT:8cKO-2cKO	2cWT-2cKO	0	0	0	0	0	0	0	84.0864	60.636	0	0	1469.39	549.42	0	0	1.53012	3.02293	0	0	1.31246	0	9.87822	1.70033	5.73845	0	16.3524	0	2.14789	0	28.9589	1.0193	138.861	0	54.2398	3.15797	23.7958
B2_Mm1a_dup4267	192.771	-18.7683	1.57025	-11.9524	6.3049e-33	1.8755e-29	Down	B2_Mm1a	B2	SINE	B2_Mm1a:B2:SINE	8cWT-2cWT:8cKO-2cKO	2cWT-2cKO	0	0	0	0	0	0	1047.54	0	225.22	0	0	3703.83	226.232	80.8144	12.8253	0	0.732832	0.210491	0	6.14784	9.60617	2.03375	0	0.157218	0.14008	0	0.273791	1.86151	0.243928	292.002	352.678	800.02	177.233	152.485	4.73696	3.39941
B2_Mm1a_dup4515	65.8754	-18.7448	1.52748	-12.2717	1.28531e-34	4.58805e-31	Down	B2_Mm1a	B2	SINE	B2_Mm1a:B2:SINE	8cWT-2cWT:8cKO-2cKO	2cWT-2cKO	0	0	0	0	0	0	0	0	874.891	0	0	376.454	727.174	80.8144	2.44291	0	0.183208	0	2.77722	1.86508	0	6.97286	2.7934	1.65079	0.14008	0	0	0	13.66	38.6119	108.046	38.5228	24.3526	10.2339	37.1062	61.1893
B2_Mm1a_dup4691	65.6633	-18.2549	2.25321	-8.10174	5.41798e-16	9.48041e-14	Down	B2_Mm1a	B2	SINE	B2_Mm1a:B2:SINE	8cWT-2cWT	2cWT-2cKO	0	0	0	0	0	0	0	494.008	0	0	147.449	1226.51	387.826	0	0	4.26248	0	1.68393	1.29603	0	0	0	0	5.65984	0	3.9421	1.91654	0	3.65892	0	102.949	48.3775	0	0	0	0
B2_Mm1a_dup5375	63.7367	-3.71426	1.29899	-2.85936	0.00424503	0.038304	Down	B2_Mm1a	B2	SINE	B2_Mm1a:B2:SINE	8cWT-2cWT	2cWT-2cKO	0	4.09057	0	2.77932	0	0	0	578.094	199.233	0	0	497.891	420.145	34.6347	19.299	22.4054	13.9238	31.3632	0	20.0323	0	33.9927	31.8205	18.3159	25.9147	0.876023	0.273791	3.43663	12.1964	9.65297	116.2	148.716	1.35292	2.04678	0.789493	108.781
B2_Mm1a_dup5449	29.211	-4.40118	1.58016	-2.78528	0.00534819	0.0451962	Down	B2_Mm1a	B2	SINE	B2_Mm1a:B2:SINE	8cWT-2cWT	2cWT-2cKO	0	0	0	0	0	1.17156	33.432	0	8.66229	43.6697	0	12.1437	0	507.976	0.122145	0	0.45802	0.841964	0.185148	0	0.738936	2.03375	0	5.3454	5.74326	7.4462	0	22.1949	61.9577	2.41324	126.393	76.1497	2.70584	1.02339	80.5283	40.7929
B2_Mm1a_dup5886	50.1922	-17.7558	2.37676	-7.47059	7.98369e-14	9.49953e-12	Down	B2_Mm1a	B2	SINE	B2_Mm1a:B2:SINE	8cWT-2cWT	2cWT-2cKO	0	0	0	0	0	0	0	0	0	0	0	60.7185	1147.32	600.335	0	0	5.22143	0	0	0	0	0	0	0	0	6.13216	0	0	5.36642	2.41324	18.3474	1.79176	0	4.09357	0.789493	0
B2_Mm1a_dup5947	114.771	-16.4674	2.27313	-7.24437	4.34462e-13	4.64328e-11	Down	B2_Mm1a	B2	SINE	B2_Mm1a:B2:SINE	8cWT-2cWT:8cKO-2cKO	2cWT-2cKO	0	0	0	0	0	0	55.72	1450.49	1888.38	0	0	0	0	715.784	0	0.109294	0	0	0	0	0	0	0.121452	0.471653	5.04287	0	0	0	0	0	39.7527	18.8135	9.47045	0	62.37	0
B2_Mm1a_dup6281	9.03925	-4.3865	1.31511	-3.33545	0.000851617	0.0114542	Down	B2_Mm1a	B2	SINE	B2_Mm1a:B2:SINE	8cWT-2cWT	2cWT-2cKO	0	0	0.832132	0	0	0	980.672	10.5108	8.66229	0	147.449	24.2874	0	0	20.0319	22.1868	1.19085	5.26227	1.20346	0.0690769	1.23156	0	2.30759	11.9485	9.24525	24.5286	0.273791	3.43663	1.95142	0	1.0193	5.37527	2.70584	25.5848	209.216	0
B2_Mm1a_dup6667	109.629	-13.982	1.95593	-7.1485	8.77297e-13	8.79663e-11	Down	B2_Mm1a	B2	SINE	B2_Mm1a:B2:SINE	8cWT-8cKO:8cWT-2cWT:8cKO-2cKO	2cWT-2cKO	0	0	0	0	0	0	0	0	17.3246	43.6697	2912.11	825.771	0	150.084	0.610727	0	0	0	0	0	0	0	0	0.0786089	0	0.146004	0	0	0	9.65297	0	34.0434	0	11.2573	10.2634	0
B2_Mm1a_dup6742	124.159	-19.1475	2.07466	-9.2292	2.72658e-20	1.08142e-17	Down	B2_Mm1a	B2	SINE	B2_Mm1a:B2:SINE	8cWT-2cWT	2cWT-2cKO	0	0	0	0	0	0	0	0	1983.66	0	0	1991.57	0	288.623	14.1689	0	0.732832	0	0	4.00646	0.738936	0	0	3.93044	0	11.3883	0	0.143193	8.04963	0	34.6562	111.089	2.70584	0	135.003	3.39941
B2_Mm1a_dup6952	55.1541	-17.6686	1.84816	-9.56008	1.17662e-21	6.45539e-19	Down	B2_Mm1a	B2	SINE	B2_Mm1a:B2:SINE	8cWT-2cWT:8cKO-2cKO	2cWT-2cKO	0	0	0	0	0	0	0	0	164.584	0	0	850.059	0	923.593	7.81731	0	0.274812	0	0.555443	4.35185	0	0	0.121452	0.0786089	0	0	0.547582	0.429578	0	2.41324	7.1351	61.8157	4.05877	1.02339	11.8424	0
B2_Mm1a_dup6996	73.6788	-16.1964	2.2824	-7.09623	1.28203e-12	1.24357e-10	Down	B2_Mm1a	B2	SINE	B2_Mm1a:B2:SINE	8cWT-2cWT:8cKO-2cKO	2cWT-2cKO	0	0	0	0	0	0	323.176	0	0	0	0	1469.39	597.899	0	0	0	0.366416	0	0	0.0690769	0	0	0	3.85183	0.14008	0.146004	0.273791	0	0	299.242	8.1544	0.895879	0	22.5146	0	0
B2_Mm1a_dup7050	7.15971	-4.35793	1.38904	-3.13736	0.00170477	0.0195922	Down	B2_Mm1a	B2	SINE	B2_Mm1a:B2:SINE	NA	2cWT-2cKO	0	0	0.832132	0	0	0	0	0	0	0	0	0	0	11.5449	17.2225	0.218589	7.96955	13.2609	0	3.38477	6.1578	0	2.67195	2.98714	0.280159	8.46822	8.21373	12.7442	19.7582	0	71.351	15.2299	1.35292	20.4678	0	40.7929
B2_Mm1a_dup7642	130.024	-18.1189	1.8423	-9.83492	7.96311e-23	4.90088e-20	Down	B2_Mm1a	B2	SINE	B2_Mm1a:B2:SINE	8cWT-8cKO:8cWT-2cWT:8cKO-2cKO	2cWT-2cKO	0	0	0	0	0	0	22.288	756.778	0	87.3395	0	2829.48	0	912.048	0.488582	0	0	0	1.29603	0.0690769	0.246312	0	0.121452	0	0	17.6665	0	0	0	2.41324	1.0193	7.16703	45.9993	7.16374	57.633	20.3964
B2_Mm1a_dup7859	51.2153	-17.8735	2.51617	-7.10345	1.21683e-12	1.19988e-10	Down	B2_Mm1a	B2	SINE	B2_Mm1a:B2:SINE	8cWT-2cWT	2cWT-2cKO	0	0	0	0	0	0	501.48	0	121.272	0	0	315.736	0	842.778	15.7568	0	0	0	0	0	0	0	0	0.864698	0	0	0	0	0	36.1986	29.5597	7.16703	0	2.04678	22.1058	0
B2_Mm1a_dup7880	188.819	-12.7471	2.07612	-6.13986	8.25941e-10	4.70971e-08	Down	B2_Mm1a	B2	SINE	B2_Mm1a:B2:SINE	8cWT-2cWT:8cKO-2cKO	2cWT-2cKO	0	0	0	0	0	0	44.576	0	1455.27	0	1732.52	3218.08	0	253.988	0	0	0	0.420982	0	0	0	0	0	0	0	0	0	0	0	4.82649	122.316	0	0	108.48	11.8424	33.9941
B2_Mm1a_dup8109	149.477	-4.06159	1.48317	-2.73844	0.00617311	0.0499028	Down	B2_Mm1a	B2	SINE	B2_Mm1a:B2:SINE	8cWT-2cWT:8cKO-2cKO	2cWT-2cKO	0	0	0	0	0	0	22.288	94.5972	346.492	698.716	1032.14	1979.42	64.6377	346.347	0	6.66696	1.28246	0.210491	0	0.0690769	0	38.0602	2.30759	0.70748	0	1.60604	0	0.143193	8.04963	14.4795	36.6948	17.0217	54.1169	53.2164	3.94747	377.334
B2_Mm1a_dup8159	75.5338	-16.134	2.46696	-6.54004	6.15013e-11	4.15786e-09	Down	B2_Mm1a	B2	SINE	B2_Mm1a:B2:SINE	8cWT-2cWT:8cKO-2cKO	2cWT-2cKO	0	0	0	0	0	0	11.144	746.267	0	0	0	534.323	16.1594	1142.95	0	0	0	0	0	0	4.67993	0	0	0	0	0	0	0	0	0	219.149	58.2321	1.35292	19.4444	41.0537	0
B2_Mm1a_dup8717	59.4502	-4.01304	1.32226	-3.03499	0.00240545	0.0252544	Down	B2_Mm1a	B2	SINE	B2_Mm1a:B2:SINE	8cWT-2cWT:8cKO-2cKO	2cWT-2cKO	0	0	1.66426	0	0	0	0	157.662	233.882	262.018	221.173	157.868	0	80.8144	23.4519	1.42083	1.00764	2.94687	0.925739	1.51969	0	0.290536	0.121452	33.4874	4.34247	20.2945	0.273791	19.6174	3.41499	21.7192	236.478	23.2929	211.056	37.8655	0	418.127
B2_Mm1a_dup8841	49.5628	-15.7567	2.65521	-5.93425	2.95189e-09	1.55414e-07	Down	B2_Mm1a	B2	SINE	B2_Mm1a:B2:SINE	8cWT-2cWT	2cWT-2cKO	0	0	0	0	0	0	0	115.619	1238.71	0	0	0	0	415.617	0	0	0	0	0	0	0	0	0	3.38018	0	0	0	0	0	0	0	19.7093	1.35292	14.3275	20.5268	0
B2_Mm1t_dup1063	60.8626	-17.1299	2.74158	-6.24821	4.1519e-10	2.48668e-08	Down	B2_Mm1t	B2	SINE	B2_Mm1t:B2:SINE	8cWT-2cWT:8cKO-2cKO	2cWT-2cKO	0	0	0	0	0	0	0	0	675.659	0	0	0	953.406	230.898	0	0	0	0	0	4.21369	0.246312	0	5.10099	0.393044	0	0	0	0	0	84.4635	0	137.07	0	0	0	0
B2_Mm1t_dup10920	134.583	-15.9224	2.02135	-7.87712	3.35003e-15	5.24485e-13	Down	B2_Mm1t	B2	SINE	B2_Mm1t:B2:SINE	8cWT-2cWT:8cKO-2cKO	2cWT-2cKO	0	0	0	0	0	0	1181.26	0	0	0	331.759	3011.64	0	253.988	0	0	1.46566	0	0	0	0	0	0	0	0.14008	1.16803	1.09516	0	0	0	1.0193	54.6486	20.2938	0	2.36848	40.7929
B2_Mm1t_dup11675	69.7461	-14.6646	2.40896	-6.0875	1.14684e-09	6.39651e-08	Down	B2_Mm1t	B2	SINE	B2_Mm1t:B2:SINE	8cWT-2cWT:8cKO-2cKO	2cWT-2cKO	0	0	0	0	0	0	0	0	129.934	305.688	774.105	1226.51	0	0	0	0	0	0	0	0	0	0	0.121452	1.41496	0	0	0	0	0	0	76.4475	43.0022	0	0	16.5794	6.79881
B2_Mm1t_dup11994	105.571	-4.83683	1.51615	-3.1902	0.00142172	0.0171452	Down	B2_Mm1t	B2	SINE	B2_Mm1t:B2:SINE	8cWT-2cWT	2cWT-2cKO	2.33369	0	0.832132	0	0	0	0	746.267	883.554	0	36.8621	12.1437	1680.58	0	10.6267	7.32273	4.6718	3.57835	4.2584	14.7825	55.9128	27.3104	13.7241	33.0157	0	3.50409	41.0687	0	24.8807	132.728	0	28.6681	0	4.09357	133.424	0
B2_Mm1t_dup12186	451.579	-15.7598	2.69303	-5.85209	4.85445e-09	2.48259e-07	Down	B2_Mm1t	B2	SINE	B2_Mm1t:B2:SINE	8cWT-2cWT:8cKO-2cKO	2cWT-2cKO	0	0	0	0	0	0	0	0	2382.13	2707.52	4239.15	0	0	6950.03	0	0	0.274812	0.420982	0	0	0	0	0.121452	0	0	0	0	0	3.17107	0	0	166.634	0	0	258.954	0
B2_Mm1t_dup12455	318.21	-18.6184	2.4432	-7.62051	2.52681e-14	3.29186e-12	Down	B2_Mm1t	B2	SINE	B2_Mm1t:B2:SINE	8cWT-2cWT	2cWT-2cKO	0	0	0	0	0	0	0	0	0	0	5197.56	364.311	387.826	5495.38	0	0	5.77105	0	6.66532	0	0	1.45268	0	0.0786089	0	15.3304	0	0	0	2.41324	0	53.7527	0	0	131.056	112.18
B2_Mm1t_dup13362	66.958	-5.691	2.00126	-2.84371	0.00445919	0.0397342	Down	B2_Mm1t	B2	SINE	B2_Mm1t:B2:SINE	8cWT-2cWT	2cWT-2cKO	0	0	0	0	0	0	0	105.108	25.9869	0	184.311	218.586	0	865.868	0	0	0.091604	0.210491	0	8.35831	0	2.03375	0	0.235827	0	19.7105	151.133	0	0	219.605	70.3317	28.6681	74.4107	259.942	0	210.763
B2_Mm1t_dup13941	92.2214	-11.4262	2.23082	-5.12197	3.02363e-07	1.04788e-05	Down	B2_Mm1t	B2	SINE	B2_Mm1t:B2:SINE	8cWT-2cWT:8cKO-2cKO	2cWT-2cKO	0	0	0	0	0	0	1459.86	0	147.259	0	0	1226.51	0	0	0	0.109294	0	0	0	0	0	0	0	0	0	0	0	0	0	135.142	107.026	68.0868	8.11753	5.11696	0	254.955
B2_Mm1t_dup14597	39.6297	-17.6084	2.52604	-6.97076	3.15228e-12	2.85593e-10	Down	B2_Mm1t	B2	SINE	B2_Mm1t:B2:SINE	8cWT-8cKO:8cWT-2cWT	2cWT-2cKO:8cKO-2cKO	0	0	0	0	0	0	880.376	0	173.246	0	0	400.742	0	0	2.07647	0	1.55727	0	0	0	0.246312	0	0	6.44593	0	0.146004	0	0	1.46357	0	0	0	0	0	0	0
B2_Mm1t_dup15121	28.8941	-16.5824	3.05881	-5.42119	5.92045e-08	2.39548e-06	Down	B2_Mm1t	B2	SINE	B2_Mm1t:B2:SINE	8cWT-2cWT	2cWT-2cKO	0	0	0	0	0	0	0	0	649.672	0	0	182.155	0	69.2694	0	0	0	0.841964	0	0	0	0	0	0	3.22183	0	0	0	3.41499	0	41.7913	0	0	118.713	0	0
B2_Mm1t_dup15452	79.2159	-13.6892	2.34046	-5.84892	4.9477e-09	2.52304e-07	Down	B2_Mm1t	B2	SINE	B2_Mm1t:B2:SINE	8cWT-2cWT:8cKO-2cKO	2cWT-2cKO	0	0	0	0	0	0	0	0	389.803	0	1437.62	0	0	981.317	0.244291	0	0.091604	0	0	0.138154	0	0	0	0.157218	0	0	0	0	0	0	0	17.0217	0	88.0117	16.5794	0
B2_Mm1t_dup16089	106.346	-14.1108	1.98816	-7.09745	1.2708e-12	1.23941e-10	Down	B2_Mm1t	B2	SINE	B2_Mm1t:B2:SINE	8cWT-2cWT:8cKO-2cKO	2cWT-2cKO	0	0	0	0	0	0	11.144	0	0	1572.11	0	1299.38	0	0	0	0	0.091604	0.420982	0	0	0	0.290536	0	0	0.14008	0.146004	0	0	0	0	350.639	428.23	37.8818	11.2573	5.52645	217.562
B2_Mm1t_dup18001	63.2856	-18.902	2.35432	-8.02866	9.85449e-16	1.65927e-13	Down	B2_Mm1t	B2	SINE	B2_Mm1t:B2:SINE	8cWT-8cKO:8cWT-2cWT	2cWT-2cKO	0	0	0	0	0	0	0	126.13	1524.56	0	0	412.886	226.232	0	0	0	0.732832	0	0.0925739	6.49323	21.9218	0	0	4.87375	0.420239	0	1.09516	0	0	0	0	16.1258	0	0	0	0
B2_Mm1t_dup18692	59.1081	-4.73745	1.42661	-3.32078	0.000897659	0.0119563	Down	B2_Mm1t	B2	SINE	B2_Mm1t:B2:SINE	8cWT-2cWT	2cWT-2cKO	1.16685	0	0.832132	0	0	0	0	73.5756	874.891	0	0	0	0	738.874	1.22145	4.59037	0.45802	13.6819	7.86878	13.4009	2.70943	0	6.31551	20.1239	5.60318	25.5507	45.4493	0.143193	1.7075	0	98.8721	86.9003	2.70584	40.9357	78.1598	0
B2_Mm1t_dup18986	91.726	-14.7755	1.72298	-8.57552	9.86369e-18	2.46713e-15	Down	B2_Mm1t	B2	SINE	B2_Mm1t:B2:SINE	8cWT-2cWT:8cKO-2cKO	2cWT-2cKO	0	0	0	0	0	0	367.752	31.5324	77.9606	0	0	2501.6	0	115.449	0	0	0.183208	0	0	0	0	0	0	0.157218	1.26072	0	0	0	0	113.422	40.772	40.3146	59.5286	3.07018	10.2634	30.5947
B2_Mm1t_dup21737	24.1448	-4.76945	1.69468	-2.81436	0.0048875	0.0425108	Down	B2_Mm1t	B2	SINE	B2_Mm1t:B2:SINE	8cWT-2cWT	2cWT-2cKO	0	0	0	0	0	0	902.664	0	17.3246	0	0	704.334	0	0	24.0627	0.218589	12.733	8.20915	3.79553	4.00646	3.69468	2.90536	0.850165	9.43306	0	61.3216	0	0	22.4414	9.65297	2.0386	54.6486	104.175	0	0	6.79881
B2_Mm1t_dup22411	101.559	-15.3887	1.90182	-8.09158	5.8898e-16	1.01078e-13	Down	B2_Mm1t	B2	SINE	B2_Mm1t:B2:SINE	8cWT-2cWT:8cKO-2cKO	2cWT-2cKO	0	0	0	0	0	0	0	462.475	1333.99	524.037	0	0	0	634.97	0	1.42083	0	0	0	0	0	0	0	1.02192	0.14008	0	0	0	0	48.2649	125.374	14.3341	91.9987	11.2573	0	343.34
B2_Mm1t_dup22944	110.423	-5.56989	1.69693	-3.28234	0.0010295	0.013373	Down	B2_Mm1t	B2	SINE	B2_Mm1t:B2:SINE	8cWT-2cWT	2cWT-2cKO	0	1.02264	0	0	0	0	0	0	69.2983	0	995.278	1833.7	549.42	57.7245	5.49655	11.9131	0	0.841964	10.8311	11.3286	0.246312	0	4.25083	17.3726	0.560318	221.196	0	0.143193	0.243928	2.41324	60.1387	19.7093	0	38.8889	163.425	10.1982
B2_Mm1t_dup23097	266.315	-17.9898	2.20663	-8.15261	3.5616e-16	6.62162e-14	Down	B2_Mm1t	B2	SINE	B2_Mm1t:B2:SINE	8cWT-2cWT:8cKO-2cKO	2cWT-2cKO	0	0	0	0	0	0	590.632	0	0	2882.2	0	2440.88	0	2920.86	14.0467	0.109294	3.75576	0	0	0	0	0	0.121452	0	0	0	0	0	0	243.738	296.616	123.631	328.76	4.09357	0.789493	3.39941
B2_Mm1t_dup4618	199.207	-16.2992	2.36611	-6.88859	5.63468e-12	4.83499e-10	Down	B2_Mm1t	B2	SINE	B2_Mm1t:B2:SINE	8cWT-2cWT:8cKO-2cKO	2cWT-2cKO	0	0	0	0	0	0	0	599.116	0	3668.26	0	2647.33	0	126.994	0	0	4.5802	0	0	0	0	0	0	0	0	0.146004	0.273791	0	0	0	3.0579	46.5857	120.41	16.3743	0	0
B2_Mm1t_dup531	66.9149	-17.132	2.5399	-6.74515	1.52865e-11	1.18623e-09	Down	B2_Mm1t	B2	SINE	B2_Mm1t:B2:SINE	8cWT-2cWT	2cWT-2cKO	0	0	0	0	0	0	0	0	0	0	995.278	777.196	16.1594	519.521	0	0	2.83972	0	0	0	0	0	0	6.36732	0	0	0	0.286386	0	0	128.432	13.4382	0	7.16374	0	0
B2_Mm1t_dup5328	85.1729	-17.3191	2.06841	-8.37313	5.61089e-17	1.22126e-14	Down	B2_Mm1t	B2	SINE	B2_Mm1t:B2:SINE	8cWT-2cWT:8cKO-2cKO	2cWT-2cKO	0	0	0	0	0	0	1493.3	189.194	0	0	0	692.191	0	588.79	0	0	0.091604	0	0	0.0690769	0	7.84447	0	0.0786089	3.36191	0	0	0	0	0	54.0229	7.16703	6.76461	2.04678	0	10.1982
B2_Mm1t_dup5473	47.6125	-5.1602	1.41505	-3.64665	0.000265676	0.00447761	Down	B2_Mm1t	B2	SINE	B2_Mm1t:B2:SINE	8cWT-2cWT:8cKO-2cKO	2cWT-2cKO	0	0	0	0	0	0	0	0	43.3115	174.679	0	740.765	0	184.719	2.6872	1.53012	2.56491	14.9449	8.33165	12.4338	8.12829	0	1.94323	16.5865	1.4008	23.2146	7.39236	24.1996	0.243928	4.82649	282.346	75.2538	70.3519	46.0526	0	0
B2_Mm1t_dup5627	51.6509	-16.6063	2.45279	-6.77037	1.28456e-11	1.00999e-09	Down	B2_Mm1t	B2	SINE	B2_Mm1t:B2:SINE	8cWT-2cWT:8cKO-2cKO	2cWT-2cKO	0	0	0	0	0	0	0	84.0864	181.908	87.3395	0	1432.96	0	0	0	0	1.09925	0	0	0.207231	0	0	0.364356	4.79514	0	0	0	0	0	0	37.7141	0	79.8224	0	0.789493	0
B2_Mm1t_dup5684	103.957	-17.8044	1.92565	-9.24589	2.33294e-20	9.46325e-18	Down	B2_Mm1t	B2	SINE	B2_Mm1t:B2:SINE	8cWT-2cWT:8cKO-2cKO	2cWT-2cKO	0	0	0	0	0	0	11.144	0	0	2052.48	0	1238.66	0	0	6.59585	1.53012	6.32068	0	2.03663	1.17431	0	0	0	0.393044	0	0	0.547582	0	0	4.82649	111.104	52.8569	44.6464	59.3567	0	248.157
B2_Mm1t_dup7164	186.367	-11.861	2.64483	-4.48461	7.30484e-06	0.000194302	Down	B2_Mm1t	B2	SINE	B2_Mm1t:B2:SINE	8cWT-2cWT:8cKO-2cKO	2cWT-2cKO	0	0	0	0	0	0	0	10.5108	0	1877.8	2838.38	2003.71	0	0	0	0	0	0.210491	0.0925739	0	0	0	0	0	0	0	0	0	3.17107	0	0	99.4426	14.8821	0	47.3696	0
B2_Mm1t_dup7358	98.2115	-13.043	2.41205	-5.40741	6.39411e-08	2.56454e-06	Down	B2_Mm1t	B2	SINE	B2_Mm1t:B2:SINE	8cWT-2cWT:8cKO-2cKO	2cWT-2cKO	0	0	0	0	0	0	0	0	0	0	0	2768.76	0	207.808	0.122145	0	0	0	0	0	0	0	0	0	0	0.292008	0	0	0	270.283	9.1737	0.895879	154.233	0	20.5268	0
B2_Mm1t_dup7701	43.0712	-18.0491	1.92522	-9.37508	6.91261e-21	3.24674e-18	Down	B2_Mm1t	B2	SINE	B2_Mm1t:B2:SINE	8cWT-2cWT:8cKO-2cKO	2cWT-2cKO	0	0	0	0	0	0	11.144	10.5108	1420.62	0	0	1930.85	0	0	0	0	0.091604	0	1.94405	0.138154	0	5.81072	0	0	37.4013	5.25614	0.273791	26.0611	0	77.2238	1.0193	117.36	13.5292	0	14.2109	23.7958
B2_Mm1t_dup8633	98.0282	-16.7977	2.51584	-6.6768	2.44209e-11	1.77904e-09	Down	B2_Mm1t	B2	SINE	B2_Mm1t:B2:SINE	8cWT-2cWT:8cKO-2cKO	2cWT-2cKO	0	0	0	0	0	0	356.608	0	0	0	0	862.202	1955.29	242.443	0	0.109294	0	0	0	0	0	0.290536	0	0	0	0	0	7.01645	0	127.902	27.5211	0	0	8.18714	39.4747	0
B2_Mm1t_dup8932	311.254	-13.7963	2.5429	-5.4254	5.78243e-08	2.35091e-06	Down	B2_Mm1t	B2	SINE	B2_Mm1t:B2:SINE	8cWT-2cWT:8cKO-2cKO	2cWT-2cKO	0	0	0	0	0	0	0	126.13	744.957	436.697	9289.26	0	32.3188	0	0	0	0.732832	0	0	0	0	0	0	0	0	0	0	0	0	608.137	138.625	0	114.998	24.5614	0	0
B2_Mm1t_dup9643	258.411	-12.8061	2.34405	-5.46323	4.67545e-08	1.93165e-06	Down	B2_Mm1t	B2	SINE	B2_Mm1t:B2:SINE	8cWT-2cWT:8cKO-2cKO	2cWT-2cKO	0	0	0	0	0	0	11.144	126.13	1385.97	3056.88	0	4772.47	0	0	0	0	5.49624	0.420982	0	0	0	0	0	0	0	4.81813	0	0	0	0	0	0	156.939	2.04678	7.10544	27.1952
B2_Mm2_dup11598	60.8845	-12.0554	2.22229	-5.42475	5.80345e-08	2.35409e-06	Down	B2_Mm2	B2	SINE	B2_Mm2:B2:SINE	8cWT-2cWT:8cKO-2cKO	2cWT-2cKO	0	0	0	0	0	0	635.208	945.972	0	0	258.035	97.1495	0	0	0	0	0	0	0	0.138154	0	0	0	0	0	0	0	0	0	0	17.3281	0	0	68.5673	12.6319	6.79881
B2_Mm2_dup16796	81.4768	-14.3244	2.67964	-5.34565	9.00914e-08	3.50316e-06	Down	B2_Mm2	B2	SINE	B2_Mm2:B2:SINE	8cWT-2cWT:8cKO-2cKO	2cWT-2cKO	0	0	0	0	0	0	0	0	1559.21	0	0	825.771	0	0	0	0	0.091604	0	9.07224	0	0	0	0.364356	0	0	0	0	0	0.731784	381.292	0	0	110.94	0	30.7902	0
B2_Mm2_dup18889	119.594	-16.0195	2.11954	-7.55801	4.09283e-14	5.14428e-12	Down	B2_Mm2	B2	SINE	B2_Mm2:B2:SINE	8cWT-2cWT:8cKO-2cKO	2cWT-2cKO	0	0	0	0	0	0	0	304.813	649.672	43.6697	2985.83	48.5748	0	0	0.122145	0	0	0	0	0	2.70943	0	0.364356	0.314435	0	0	0	0.429578	0.243928	89.29	0	0	162.351	0	136.582	0
B2_Mm2_dup18920	94.987	-14.7235	1.79077	-8.22189	2.0032e-16	3.92892e-14	Down	B2_Mm2	B2	SINE	B2_Mm2:B2:SINE	8cWT-2cWT:8cKO-2cKO	2cWT-2cKO	0	0	0	0	0	0	1504.44	252.259	155.921	0	0	1007.93	0	11.5449	0	0	0	0	0	0	0	0	0.121452	0	0	1.02203	0.273791	0.143193	0	36.1986	0	216.803	144.763	67.5439	5.52645	0
B2_Mm2_dup19497	73.1249	-14.633	2.96372	-4.93738	7.91802e-07	2.5281e-05	Down	B2_Mm2	B2	SINE	B2_Mm2:B2:SINE	8cWT-2cWT	2cWT-2cKO	0	0	0	0	0	0	791.224	10.5108	251.206	0	0	1627.25	0	0	0	0	0	0	1.38861	0	0	0	0	0	0	0	0	0	0	0	0	0	0	15.3509	8.68443	0
B2_Mm2_dup20720	66.2302	-18.0823	2.6091	-6.93046	4.19483e-12	3.72484e-10	Down	B2_Mm2	B2	SINE	B2_Mm2:B2:SINE	8cWT-2cWT	2cWT-2cKO	0	0	0	0	0	0	0	0	528.4	0	0	570.754	226.232	761.964	0	0	2.3817	0	0	0	0	0	7.65149	0	12.7472	0	0	0	0	0	11.2123	115.568	85.2341	0	0	0
B2_Mm2_dup20736	91.0094	-16.906	2.52837	-6.68652	2.28535e-11	1.68549e-09	Down	B2_Mm2	B2	SINE	B2_Mm2:B2:SINE	8cWT-2cWT:8cKO-2cKO	2cWT-2cKO	0	0	0	0	0	0	1103.26	31.5324	0	0	0	765.053	1131.16	0	0	0	0	0	0	0.207231	0.246312	0	7.16568	0	0	0	0	0	0	0	0	71.6703	0	17.3977	144.477	95.1834
B2_Mm2_dup2229	85.9763	-18.3684	2.05717	-8.92895	4.30069e-19	1.42146e-16	Down	B2_Mm2	B2	SINE	B2_Mm2:B2:SINE	8cWT-2cWT	2cWT-2cKO	0	0	0	0	0	0	11.144	956.483	0	0	0	1141.51	937.247	11.5449	0	0	1.28246	0	2.59207	0.621692	0	6.68233	0	3.93044	0	0	6.84478	2.43428	0	0	56.0615	0	0	41.9591	0.789493	0
B2_Mm2_dup27490	55.8332	-15.816	1.68604	-9.38055	6.56304e-21	3.16587e-18	Down	B2_Mm2	B2	SINE	B2_Mm2:B2:SINE	8cWT-8cKO:8cWT-2cWT:8cKO-2cKO	2cWT-2cKO	0	0	0	0	0	0	0	0	129.934	0	0	1627.25	0	184.719	0.122145	0	0.549624	0	0	0.483538	0	0.581072	0	0	0	1.75205	1.09516	0.143193	0	0	7.1351	29.564	45.9993	3.07018	11.8424	16.997
B2_Mm2_dup28344	122.576	-18.3487	2.03431	-9.0196	1.8878e-19	6.73868e-17	Down	B2_Mm2	B2	SINE	B2_Mm2:B2:SINE	8cWT-2cWT:8cKO-2cKO	2cWT-2cKO	0	0	0	0	0	0	0	0	0	87.3395	516.07	3363.8	339.348	23.0898	0	0.655767	0	0	0	2.48677	0.246312	4.93911	0	3.69462	0.14008	11.5343	0	0	0	0	88.6791	65.3992	0	18.4211	9.47392	0
B2_Mm2_dup31368	139.646	-15.6275	2.41013	-6.48409	8.92692e-11	5.90102e-09	Down	B2_Mm2	B2	SINE	B2_Mm2:B2:SINE	8cWT-2cWT:8cKO-2cKO	2cWT-2cKO	0	0	0	0	0	0	0	199.705	1784.43	0	0	2453.03	517.102	0	0	0.218589	0.091604	0	0	0	0	0	2.67195	0.0786089	0	0	0	0	0	0	4.0772	0	0	56.2866	149.214	0
B2_Mm2_dup32080	48.2555	-16.9622	2.18753	-7.75401	8.9032e-15	1.29191e-12	Down	B2_Mm2	B2	SINE	B2_Mm2:B2:SINE	8cWT-2cWT:8cKO-2cKO	2cWT-2cKO	0	0	0	0	0	0	0	430.943	511.075	0	0	558.61	0	0	0	0	0	8.20915	0	0	0	0	0	0.0786089	0	0.146004	0	0	0	31.3722	64.2159	73.4621	59.5286	38.8889	5.52645	3.39941
B2_Mm2_dup337	83.8429	-16.405	2.80161	-5.85557	4.75381e-09	2.43811e-07	Down	B2_Mm2	B2	SINE	B2_Mm2:B2:SINE	8cWT-2cWT:8cKO-2cKO	2cWT-2cKO	0	0	0	0	0	0	0	0	0	0	0	0	0	1627.83	0	0	0.091604	0	5.27671	0	0	0	0.121452	0	0	0	0	0	0	2.41324	169.204	193.51	0	3.07018	0	866.848
B2_Mm2_dup34802	61.0042	-16.506	3.36119	-4.91075	9.07277e-07	2.86603e-05	Down	B2_Mm2	B2	SINE	B2_Mm2:B2:SINE	8cWT-2cWT	2cWT-2cKO	0	0	0	0	0	0	624.064	0	563.049	0	0	0	0	900.503	0	0	0	0	0	0	0	0	5.95116	0	0	0	0	0	0	16.8927	0	0	100.116	0	46.5801	0
B2_Mm2_dup35112	113.624	-16.0298	2.10627	-7.61054	2.72943e-14	3.50793e-12	Down	B2_Mm2	B2	SINE	B2_Mm2:B2:SINE	8cWT-2cWT:8cKO-2cKO	2cWT-2cKO	0	0	0	0	0	0	0	10.5108	1498.58	87.3395	36.8621	0	0	2031.9	0	0	0	29.2582	0	0	0	0	0	0	0	0	0	0.143193	0	41.0251	203.86	130.798	4.05877	13.3041	5.52645	135.976
B2_Mm2_dup36122	84.5428	-17.869	2.77241	-6.4453	1.15372e-10	7.48782e-09	Down	B2_Mm2	B2	SINE	B2_Mm2:B2:SINE	8cWT-2cWT	2cWT-2cKO	0	0	0	0	0	0	0	0	0	1397.43	0	1287.23	0	150.084	0	0	8.24436	0	0	3.93738	5.17255	0	0	0	0	0	0	0	0	0	42.8106	133.486	31.1172	68.5673	0	0
B2_Mm2_dup38216	70.331	-12.6365	2.50182	-5.0509	4.39734e-07	1.47526e-05	Down	B2_Mm2	B2	SINE	B2_Mm2:B2:SINE	8cWT-2cWT:8cKO-2cKO	2cWT-2cKO	0	0	0	0	0	0	144.872	851.375	8.66229	0	0	1323.66	0	0	0	0.109294	0	0	0	0	0	0	0	0.157218	0	0	0	0	0	0	80.5247	0	0	0	67.1069	125.778
B2_Mm2_dup39500	40.4584	-17.2169	3.73841	-4.60541	4.1165e-06	0.000115214	Down	B2_Mm2	B2	SINE	B2_Mm2:B2:SINE	8cWT-2cWT	2cWT-2cKO	0	0	0	0	0	0	0	0	199.233	0	0	255.018	0	981.317	0	0	0	0	0	0	10.3451	0	0	0	0	0	0	0	0	0	16.3088	0	0	0	34.7377	0
B2_Mm2_dup40944	128.036	-15.6185	2.05566	-7.5978	3.012e-14	3.83987e-12	Down	B2_Mm2	B2	SINE	B2_Mm2:B2:SINE	8cWT-2cWT:8cKO-2cKO	2cWT-2cKO	0	0	0	0	0	0	0	409.921	0	0	3796.8	12.1437	16.1594	138.539	15.5125	0	0	0	0.185148	0.483538	0	0	0	0	0.420239	0	0	0.143193	0	0	164.107	8.95879	0	55.2632	132.635	0
B2_Mm2_dup42245	144.168	-19.0321	2.63296	-7.22838	4.88787e-13	5.16205e-11	Down	B2_Mm2	B2	SINE	B2_Mm2:B2:SINE	8cWT-2cWT	2cWT-2cKO	0	0	0	0	0	0	0	0	381.141	1266.42	3133.28	0	0	0	0	0	0	0	0	0	15.764	0	22.2257	2.82992	0	0	0	0	0	0	40.772	124.527	9.47045	57.31	0.789493	0
B2_Mm2_dup42373	57.0339	-7.09954	1.88554	-3.76525	0.000166383	0.00303599	Down	B2_Mm2	B2	SINE	B2_Mm2:B2:SINE	8cWT-2cWT	2cWT-2cKO	0	0	0	0	0	0	22.288	220.727	95.2852	742.385	0	72.8622	0	288.623	2.80935	0.109294	0	0	5.46186	1.796	2.95574	4.64858	11.9023	6.2101	0	445.604	0	0	0.487856	0	3.0579	20.6052	106.881	41.9591	0	13.5976
B2_Mm2_dup42493	70.9022	-15.3544	3.00369	-5.11184	3.1903e-07	1.10136e-05	Down	B2_Mm2	B2	SINE	B2_Mm2:B2:SINE	8cWT-2cWT:8cKO-2cKO	2cWT-2cKO	0	0	0	0	0	0	0	651.67	0	0	0	170.012	0	1570.11	0	0	0	0	0.0925739	0	0	0	0	0	0	0	0	0	2.43928	21.7192	40.772	0	0	0	0	166.571
B2_Mm2_dup43168	97.3215	-18.9126	2.35526	-8.02992	9.75395e-16	1.65799e-13	Down	B2_Mm2	B2	SINE	B2_Mm2:B2:SINE	8cWT-2cWT	2cWT-2cKO	0	0	0	0	0	0	11.144	0	978.839	0	0	0	921.087	1269.94	0	0	0	0	0.648017	0	0.246312	10.4593	0	24.6046	0	0	0	0	0.731784	33.7854	215.072	120.048	0	4.09357	0	10.1982
B2_Mm2_dup43865	180.128	-17.2434	2.42906	-7.09882	1.2583e-12	1.23396e-10	Down	B2_Mm2	B2	SINE	B2_Mm2:B2:SINE	8cWT-2cWT	2cWT-2cKO	0	0	0	0	0	0	0	0	0	0	3944.25	2161.58	403.986	23.0898	0	0	7.96955	0	0	3.03938	0	0	0	0.471653	0	0	0.273791	0	0	4.82649	22.4246	0	0	84.9415	7.89493	0
B2_Mm2_dup44331	43.6921	-14.7594	2.0611	-7.16095	8.0117e-13	8.07869e-11	Down	B2_Mm2	B2	SINE	B2_Mm2:B2:SINE	8cWT-2cWT:8cKO-2cKO	2cWT-2cKO	0	0	0	0	0	0	11.144	882.908	0	0	0	60.7185	290.87	0	0	0.109294	0	0	0	0	0.246312	0	0	0	0	63.8037	0.547582	0	0	0	86.6405	72.5662	0	0	1.57899	203.964
B2_Mm2_dup45792	100.532	-18.7729	2.08597	-8.99961	2.26523e-19	7.9274e-17	Down	B2_Mm2	B2	SINE	B2_Mm2:B2:SINE	8cWT-2cWT	2cWT-2cKO	0	0	0	0	0	0	0	0	259.869	0	0	2234.44	16.1594	946.682	0	5.02755	0	0	0	6.56231	4.67993	1.16214	0	0.157218	0	16.4984	0	0	0	4.82649	87.6598	3.58352	0	1.02339	15.7899	115.58
B2_Mm2_dup46054	43.6236	-15.3791	2.48436	-6.19035	6.00308e-10	3.53607e-08	Down	B2_Mm2	B2	SINE	B2_Mm2:B2:SINE	8cWT-2cWT:8cKO-2cKO	2cWT-2cKO	0	0	0	0	0	0	0	693.713	121.272	0	0	0	0	611.88	0.732873	0	0	0	0	1.72692	0	0	0	0	0	0	0	0	0	84.4635	4.0772	0	1.35292	3.07018	0	91.784
B2_Mm2_dup47006	139.767	-12.9702	2.38152	-5.44618	5.14645e-08	2.11158e-06	Down	B2_Mm2	B2	SINE	B2_Mm2:B2:SINE	8cWT-2cWT:8cKO-2cKO	2cWT-2cKO	0	0	0	0	0	0	11.144	0	554.387	567.706	0	2817.34	0	946.682	0	0	0	0	0	0	0	0	0.121452	0	0.280159	0	0	0	0	132.728	137.605	0	0	0	0	3.39941
B2_Mm2_dup47962	60.5675	-17.6094	2.40211	-7.33082	2.28752e-13	2.50476e-11	Down	B2_Mm2	B2	SINE	B2_Mm2:B2:SINE	8cWT-2cWT:8cKO-2cKO	2cWT-2cKO	0	0	0	0	0	0	44.576	0	883.554	0	0	655.759	0	80.8144	0	1.63942	0	9.2616	0	0	0	0	0	2.98714	0	0	0	0	0	53.0913	0	43.8981	0	0	93.1602	220.961
B2_Mm2_dup54640	193.168	-11.7013	1.95035	-5.9996	1.97802e-09	1.06658e-07	Down	B2_Mm2	B2	SINE	B2_Mm2:B2:SINE	8cWT-2cWT:8cKO-2cKO	2cWT-2cKO	0	0	0	0	0	0	468.048	0	1429.28	1790.46	0	0	32.3188	2759.23	0	0	0	0.210491	0	0	0	0	0	0	0	0	0	0	0	4.82649	199.783	0	109.587	54.2398	0	193.766
B2_Mm2_dup55907	577.597	-5.30348	1.87831	-2.82353	0.00474977	0.0416375	Down	B2_Mm2	B2	SINE	B2_Mm2:B2:SINE	8cWT-2cWT	2cWT-2cKO	0	0	0	2.77932	0	0	0	10.5108	0	0	11501	5258.22	1939.13	1489.29	0.488582	36.3951	26.1071	1.68393	0	0.759846	51.7255	0	0	7.86089	0	61.7596	0.821373	0	0	0	339.427	154.987	0	146.345	308.692	10.1982
B2_Mm2_dup57245	48.7092	-18.6786	3.08587	-6.05294	1.42226e-09	7.83472e-08	Down	B2_Mm2	B2	SINE	B2_Mm2:B2:SINE	8cWT-2cWT	2cWT-2cKO	0	0	0	0	0	0	0	767.289	718.97	43.6697	0	0	0	80.8144	0	8.63426	0	0	0	0	21.9218	0	0	0	0	0	0	0	0	0	88.6791	0	6.76461	65.4971	0	0
B2_Mm2_dup57419	55.4087	-18.5348	2.83811	-6.53068	6.54699e-11	4.40946e-09	Down	B2_Mm2	B2	SINE	B2_Mm2:B2:SINE	8cWT-2cWT	2cWT-2cKO	0	0	0	0	0	0	0	1040.57	181.908	0	36.8621	680.047	0	0	0	0	0	0	0	0	0	0	0	0	26.6151	0	0.821373	0	0	0	19.3667	0	0	12.2807	37.8957	0
B2_Mm2_dup59999	57.4986	-16.1978	2.09978	-7.71402	1.21911e-14	1.68672e-12	Down	B2_Mm2	B2	SINE	B2_Mm2:B2:SINE	8cWT-2cWT:8cKO-2cKO	2cWT-2cKO	0	0	0	0	0	0	0	63.0648	519.738	0	0	1044.36	0	265.533	0	0.109294	3.38935	0	0	0	0	0	1.09307	0	0.14008	0	0	0	0	12.0662	18.3474	44.794	39.2347	0	0	115.58
B2_Mm2_dup60367	76.8252	-17.152	2.58606	-6.63248	3.30103e-11	2.33797e-09	Down	B2_Mm2	B2	SINE	B2_Mm2:B2:SINE	8cWT-2cWT:8cKO-2cKO	2cWT-2cKO	0	0	0	0	0	0	0	1198.23	17.3246	0	0	85.0059	0	11.5449	0	0	3.66416	0	0	6.90769	0	0	0	0	0	0	0	0	0	0	707.394	60.9198	102.822	227.193	0	421.526
B2_Mm2_dup6200	157.172	-16.4524	3.32385	-4.9498	7.42898e-07	2.39337e-05	Down	B2_Mm2	B2	SINE	B2_Mm2:B2:SINE	8cWT-2cWT	2cWT-2cKO	0	0	0	0	0	0	0	872.397	138.597	0	0	1092.93	0	3578.92	0	0	0	0	3.24009	0	30.2964	0	0	0	0	0	0	0	0	0	73.3896	0	0	25.5848	0	0
B2_Mm2_dup63198	120.019	-12.9961	2.14607	-6.05576	1.39757e-09	7.72256e-08	Down	B2_Mm2	B2	SINE	B2_Mm2:B2:SINE	8cWT-2cWT:8cKO-2cKO	2cWT-2cKO	0	0	0	0	0	0	0	210.216	0	0	0	2938.77	0	577.245	0.122145	0	0	0	0	0.207231	0	0	0	0	0	0	0	0	0	352.333	202.841	18.8135	28.4114	22.5146	89.2128	0
B2_Mm2_dup65014	36.0267	-17.5488	3.90478	-4.49419	6.98367e-06	0.000188001	Down	B2_Mm2	B2	SINE	B2_Mm2:B2:SINE	8cWT-2cWT	2cWT-2cKO	0	0	0	0	0	0	0	220.727	0	0	0	0	0	300.168	12.9474	0	0	0	0	0	0	0	0	0	0	0	0	0	0	494.715	0	196.198	108.234	0	0	0
B2_Mm2_dup65951	76.4664	-14.4702	1.77238	-8.16429	3.23331e-16	6.07454e-14	Down	B2_Mm2	B2	SINE	B2_Mm2:B2:SINE	8cWT-2cWT:8cKO-2cKO	2cWT-2cKO	0	0	0	0	0	0	0	210.216	459.101	0	0	1141.51	0	542.611	0	0	0	0.210491	0.185148	0	0	0	0.850165	0	0	0	0	0	0	38.6119	148.818	2.68764	105.528	48.0994	0	84.9851
B2_Mm2_dup69875	76.7805	-16.4411	2.57109	-6.39461	1.60962e-10	1.01157e-08	Down	B2_Mm2	B2	SINE	B2_Mm2:B2:SINE	8cWT-2cWT:8cKO-2cKO	2cWT-2cKO	0	0	0	0	0	0	0	0	571.711	87.3395	0	0	0	1766.37	0	0	1.92368	3.78884	0	0	0	0	0	0	0	0	0	0.143193	0	86.8767	3.0579	1.79176	0	300.877	0	16.997
B2_Mm2_dup70930	63.2489	-18.5076	2.95178	-6.26997	3.61111e-10	2.17007e-08	Down	B2_Mm2	B2	SINE	B2_Mm2:B2:SINE	8cWT-2cWT	2cWT-2cKO	0	0	0	0	0	0	1058.68	0	43.3115	0	0	485.748	0	334.802	0	0	0	0	0	0.0690769	0	0	0	0	0	26.7187	0	0	0	0	140.663	0	0	10.2339	1.57899	0
B2_Mm2_dup73511	107.227	-15.5571	2.58489	-6.01847	1.7607e-09	9.61006e-08	Down	B2_Mm2	B2	SINE	B2_Mm2:B2:SINE	8cWT-2cWT:8cKO-2cKO	2cWT-2cKO	0	0	0	0	0	0	323.176	1114.15	0	43.6697	0	2270.87	0	0	1.83218	0	0	0	0	0.759846	0	0.290536	0	0	0	0	0	0	0	164.101	43.8299	0	0	0	4.73696	0
B2_Mm2_dup77605	209.161	-15.4626	2.38829	-6.47435	9.52238e-11	6.25064e-09	Down	B2_Mm2	B2	SINE	B2_Mm2:B2:SINE	8cWT-2cWT:8cKO-2cKO	2cWT-2cKO	0	0	0	0	0	0	0	10.5108	0	0	847.829	3509.53	1826.01	1096.77	0	0	0.091604	0	0	0	2.70943	0	0	0	0	0	0	0	0	0	124.355	72.5662	129.88	118.713	0	0
B2_Mm2_dup78097	55.6274	-18.0338	2.74954	-6.55882	5.42366e-11	3.69471e-09	Down	B2_Mm2	B2	SINE	B2_Mm2:B2:SINE	8cWT-8cKO:8cWT-2cWT	2cWT-2cKO	0	0	0	0	0	0	423.472	430.943	0	0	0	1177.94	0	0	7.81731	0.109294	0.183208	0	0	0	0	0	1.94323	8.56837	0	0	0	0	0	7.23973	0	0	0	0	0	0
B2_Mm2_dup8468	97.2654	-16.4898	2.48512	-6.63542	3.23577e-11	2.30088e-09	Down	B2_Mm2	B2	SINE	B2_Mm2:B2:SINE	8cWT-2cWT:8cKO-2cKO	2cWT-2cKO	0	0	0	0	0	0	869.232	0	0	1790.46	0	437.173	0	334.802	0	0	0.091604	0	0	5.52615	0	0	0	0	0	0	0	0	0.243928	4.82649	115.181	30.4599	10.8234	0	0	0
B2_Mm2_dup85468	70.9046	-18.0726	1.86808	-9.67442	3.87294e-22	2.22981e-19	Down	B2_Mm2	B2	SINE	B2_Mm2:B2:SINE	8cWT-8cKO:8cWT-2cWT	2cWT-2cKO	0	0	0	0	0	0	44.576	0	51.9738	0	73.7243	170.012	0	2170.44	0	1.31153	0.274812	1.26295	0.277722	0	0	0	0.364356	2.20105	0	11.8263	1.09516	0.715964	0	43.4384	42.8106	0	0	7.16374	0	0
B2_Mm2_dup85806	64.3271	-14.596	2.85443	-5.11344	3.16336e-07	1.09418e-05	Down	B2_Mm2	B2	SINE	B2_Mm2:B2:SINE	8cWT-2cWT:8cKO-2cKO	2cWT-2cKO	0	0	0	0	0	0	0	0	0	0	0	242.874	1260.44	785.054	0	0	0	0	0	0	0	0	0	0	1.4008	0	0	0	0	2.41324	0	0	0	1.02339	41.0537	0
B2_Mm2_dup87581	18.6376	-16.5537	2.59862	-6.37018	1.88805e-10	1.17007e-08	Down	B2_Mm2	B2	SINE	B2_Mm2:B2:SINE	8cWT-2cWT:8cKO-2cKO	2cWT-2cKO	0	0	0	0	0	0	11.144	0	0	0	0	2416.59	0	346.347	0	0.109294	0	0.210491	0	0	31.0353	0	0	0	1.82103	3.6501	0	0	0	0	142.702	99.4426	0	83.9181	0	0
B2_Mm2_dup89191	347.488	-18.9155	2.27571	-8.31191	9.41705e-17	2.0009e-14	Down	B2_Mm2	B2	SINE	B2_Mm2:B2:SINE	8cWT-2cWT:8cKO-2cKO	2cWT-2cKO	0	0	0	0	0	0	0	966.994	3560.2	5764.4	1032.14	48.5748	921.087	0	0	0.109294	0	0	22.4029	6.90769	0	0	0.121452	0.0786089	0	6.57017	0	0	0	108.596	0	0	0	14.3275	0	404.529
B2_Mm2_dup89786	77.7574	-12.2193	2.61302	-4.67632	2.9207e-06	8.43507e-05	Down	B2_Mm2	B2	SINE	B2_Mm2:B2:SINE	8cWT-2cWT:8cKO-2cKO	2cWT-2cKO	0	0	0	0	0	0	0	168.173	1126.1	0	0	1299.38	80.7971	0	0	0.218589	0	0	0	0	0	0	0	0	0	0	0	0	0	0	125.374	0	0	22.5146	54.475	0
B3_dup120486	38.7687	-15.6138	3.32088	-4.7017	2.58001e-06	7.53649e-05	Down	B3	B2	SINE	B3:B2:SINE	8cWT-2cWT:8cKO-2cKO	2cWT-2cKO	0	0	0	0	0	0	0	672.692	0	0	0	449.317	32.3188	0	0	0	0	0	0.0925739	0	0	0	2.91485	6.91758	0	0	0	0	0	0	0	100.338	0	0	0	176.769
B3_dup134	38.2382	-18.138	2.77929	-6.52611	6.75019e-11	4.52922e-09	Down	B3	B2	SINE	B3:B2:SINE	8cWT-2cWT	2cWT-2cKO	0	0	0	0	0	0	0	0	1082.79	0	0	48.5748	0	69.2694	0	0	3.57256	0	0	0	12.5619	4.0675	0	0	0	0	0	1.57512	0	0	0	13.4382	58.1756	0	120.792	0
B3_dup135279	69.7111	-17.9006	2.58693	-6.91961	4.52891e-12	3.96236e-10	Down	B3	B2	SINE	B3:B2:SINE	8cWT-2cWT	2cWT-2cKO	0	0	0	0	0	0	0	336.346	0	0	0	947.208	888.768	196.263	0	0	0	0	14.4415	0	0.246312	0	0	1.02192	0	0	0	0	1.46357	0	18.3474	119.152	0	0	56.054	0
B3_dup136601	154.729	-14.9492	2.46671	-6.06037	1.35809e-09	7.52769e-08	Down	B3	B2	SINE	B3:B2:SINE	8cWT-8cKO:8cWT-2cWT	2cWT-2cKO	0	0	0	0	0	0	0	662.181	0	0	2506.63	1870.13	597.899	0	0	0.218589	0	1.47344	11.942	0	0	0	1.09307	9.11863	0	0	0	0	0	0	1.0193	0.895879	0	0	62.37	0
B3_dup136771	8.47496	-5.60879	1.83088	-3.06343	0.00218812	0.0237552	Down	B3	B2	SINE	B3:B2:SINE	NA	2cWT-2cKO	1.16685	0	0	0	0	0	11.144	10.5108	0	0	0	0	0	0	46.9039	0	0.091604	0	4.53612	0	49.755	32.8306	0	2.27966	7.42422	53.4374	9.85648	14.6057	26.3442	0	41.7913	0.895879	0	0	0	0
B3_dup137901	4.42772	-4.91496	1.69096	-2.90661	0.00365366	0.0342313	Down	B3	B2	SINE	B3:B2:SINE	NA	2cWT-2cKO	0	0	0	2.77932	0	0	0	0	0	0	0	0	0	0	0.366436	0.109294	10.2596	0.420982	0.370296	0.276308	0	6.97286	16.0317	12.0272	11.7667	0.438011	90.8986	0.286386	2.92714	0	0	0	0	0	7.89493	0
B3_dup13812	69.3556	-14.8475	2.5948	-5.72203	1.05257e-08	4.9699e-07	Down	B3	B2	SINE	B3:B2:SINE	8cWT-2cWT:8cKO-2cKO	2cWT-2cKO	0	0	0	0	0	0	0	945.972	502.413	0	0	728.622	0	219.353	0	0	0	1.68393	0	0	0	0	0	0	0	0.146004	0	0	0	50.6781	73.3896	43.8981	0	0	0	0
B3_dup15478	96.4233	-11.6108	1.99672	-5.81494	6.0657e-09	3.02404e-07	Down	B3	B2	SINE	B3:B2:SINE	8cWT-8cKO:8cWT-2cWT:8cKO-2cKO	2cWT-2cKO	0	0	0	0	0	0	0	0	0	43.6697	1400.76	1894.42	0	138.539	0	0	0	0	0	0	0	0	0	0	0	0.146004	0	0	0	21.7192	21.4053	15.2299	0	18.4211	3.15797	10.1982
B3_dup16165	177.273	-13.0407	2.35412	-5.5395	3.03329e-08	1.3014e-06	Down	B3	B2	SINE	B3:B2:SINE	8cWT-2cWT:8cKO-2cKO	2cWT-2cKO	0	0	0	0	0	0	189.448	1503.05	0	0	0	497.891	0	4075.35	0	0	0	0	0	0	0	0	0	0.0786089	0.14008	0	0	0	0.243928	55.5046	0	0	83.8812	153.509	0	0
B3_dup24545	132.125	-20.3105	2.44559	-8.30494	9.9869e-17	2.09701e-14	Down	B3	B2	SINE	B3:B2:SINE	8cWT-2cWT	2cWT-2cKO	0	0	0	0	0	0	1236.98	84.0864	0	0	0	2222.3	0	1096.77	4.0308	12.8967	0	33.4681	0	0	0	0	3.76502	0	0	0	30.3908	5.8709	12.9282	0	140.663	4.4794	0	0	0	0
B3_dup39690	85.6654	-18.0276	2.3335	-7.72558	1.11348e-14	1.56483e-12	Down	B3	B2	SINE	B3:B2:SINE	8cWT-8cKO:8cWT-2cWT	2cWT-2cKO	0	0	0	0	0	0	0	0	8.66229	0	0	1578.68	96.9565	1454.66	1.22145	0	0	0	0	0	0	0.871608	0.121452	3.85183	0	0	0	1.86151	10.7328	0	11.2123	0	0	0	0.789493	0
B3_dup41505	54.1026	-16.1688	4.32798	-3.73588	0.00018706	0.00335542	Down	B3	B2	SINE	B3:B2:SINE	8cWT-2cWT	2cWT-2cKO	0	0	0	0	0	0	0	893.418	0	0	1069	0	0	0	0	0	0	0	4.72127	0	0	0	0	0	0	0	22.4509	0	0	330.614	34.6562	0	0	0	0	0
B3_dup57397	117.624	-12.3508	2.06257	-5.98804	2.12391e-09	1.13157e-07	Down	B3	B2	SINE	B3:B2:SINE	8cWT-2cWT:8cKO-2cKO	2cWT-2cKO	0	0	0	0	0	0	111.44	126.13	0	43.6697	0	2647.33	0	1027.5	0	0.218589	0	0	0	0	0	0	0	0	0	0	0	0	0	9.65297	91.737	154.987	0	84.9415	54.475	0
B3_dup61806	105.61	-16.7616	2.37674	-7.05233	1.75941e-12	1.66148e-10	Down	B3	B2	SINE	B3:B2:SINE	8cWT-2cWT:8cKO-2cKO	2cWT-2cKO	0	0	0	0	0	0	122.584	0	207.895	1004.4	147.449	1991.57	16.1594	219.353	0	1.53012	0	0	0	0	0.246312	0	0	0	0	0	5.47582	0	0	67.5708	123.335	0	0	0	0	0
B3_dup63991	59.1546	-17.2622	3.32355	-5.1939	2.05929e-07	7.36768e-06	Down	B3	B2	SINE	B3:B2:SINE	8cWT-2cWT	2cWT-2cKO	0	0	0	0	0	0	0	578.094	0	0	0	0	888.768	681.15	0	0	8.06115	0	1.48118	0	0	0	0	0	0	1.60604	0	0	0	0	29.5597	0	0	0	0	0
B3_dup64285	423.813	-13.5501	1.82928	-7.40736	1.28837e-13	1.47403e-11	Down	B3	B2	SINE	B3:B2:SINE	8cWT-2cWT:8cKO-2cKO	2cWT-2cKO	0	0	0	0	0	0	334.32	0	259.869	1484.77	11943.3	510.035	0	0	0.122145	0	0	0	0.185148	0.0690769	0	0	0	0.0786089	0	0	0	0.143193	0	0	155.953	0	59.5286	171.93	0.789493	594.896
B3_dup65648	58.432	-14.4232	2.63886	-5.46571	4.61069e-08	1.90932e-06	Down	B3	B2	SINE	B3:B2:SINE	8cWT-2cWT:8cKO-2cKO	2cWT-2cKO	0	0	0	0	0	0	0	0	0	0	0	1918.7	0	4190.8	0	0	0	0.210491	0	0	0.985248	0	0.121452	0	0	0	0	0	0	0	0	82.4209	75.7636	51.1696	29.2113	3.39941
B3_dup72012	56.564	-15.0794	2.62609	-5.74216	9.34763e-09	4.48485e-07	Down	B3	B2	SINE	B3:B2:SINE	8cWT-2cWT:8cKO-2cKO	2cWT-2cKO	0	0	0	0	0	0	11.144	0	502.413	0	0	862.202	533.261	0	0	0	0	0	0	0	0	0	0	0	0	2.04405	0	0	0	0	11.2123	133.486	0	27.6316	9.47392	0
B3_dup75547	107.196	-18.1954	1.99456	-9.12253	7.33881e-20	2.78687e-17	Down	B3	B2	SINE	B3:B2:SINE	8cWT-2cWT:8cKO-2cKO	2cWT-2cKO	0	0	0	0	0	0	22.288	10.5108	0	0	0	1882.27	32.3188	0	9.77164	5.57402	0	0	0	0.0690769	0	0	6.19406	0	0	0.292008	0	0	0.243928	149.621	219.149	21.5011	209.703	0	155.53	1002.82
B3_dup77943	64.4616	-15.1575	2.20405	-6.8771	6.10833e-12	5.21634e-10	Down	B3	B2	SINE	B3:B2:SINE	8cWT-2cWT:8cKO-2cKO	2cWT-2cKO	0	0	0	0	0	0	122.584	0	0	0	258.035	36.4311	0	1593.2	0	0	0.641228	0	0	0	0	0	0	0.471653	0.280159	0	0.821373	0	0	41.0251	0	0	282.761	40.9357	7.89493	0
B3_dup78173	146.392	-15.0412	1.97181	-7.62811	2.38214e-14	3.14936e-12	Down	B3	B2	SINE	B3:B2:SINE	8cWT-2cWT:8cKO-2cKO	2cWT-2cKO	0	0	0	0	0	0	278.6	0	0	0	0	1092.93	3264.2	57.7245	0	0	0.091604	0	0	0.138154	0	0	0	1.33635	0	0	0.273791	0	0	253.39	41.7913	93.1714	52.764	0	0	261.754
B3A_dup17862	57.0889	-17.6962	2.53095	-6.9919	2.71179e-12	2.46939e-10	Down	B3A	B2	SINE	B3A:B2:SINE	8cWT-2cWT	2cWT-2cKO	0	0	0	0	0	0	0	861.886	86.6229	0	0	400.742	646.377	0	0	1.42083	0.183208	0	0	0	1.23156	0	0	0	0	0	11.773	0	0	12.0662	25.4825	64.5033	0	0	0	0
B3A_dup28667	154.093	-13.1563	2.36907	-5.55335	2.80251e-08	1.21406e-06	Down	B3A	B2	SINE	B3A:B2:SINE	8cWT-2cWT:8cKO-2cKO	2cWT-2cKO	0	0	0	0	0	0	0	42.0432	207.895	0	0	0	775.652	4502.51	0	0	0	0.210491	0	0.138154	0	0	0.121452	0	0	0	0	0	0	0	32.6176	0	96.0575	0	0	44.1923
B3A_dup32765	58.177	-14.7072	2.73431	-5.37877	7.49951e-08	2.96131e-06	Down	B3A	B2	SINE	B3A:B2:SINE	8cWT-2cWT:8cKO-2cKO	2cWT-2cKO	0	0	0	0	0	0	323.176	0	0	0	0	400.742	80.7971	1293.03	0.366436	0	0	0	0	0	0	0	1.21452	0	0	0	0	0	0	0	0	14.3341	0	38.8889	0	0
B3A_dup33499	87.1238	-15.911	3.24873	-4.89762	9.70034e-07	3.04809e-05	Down	B3A	B2	SINE	B3A:B2:SINE	8cWT-2cWT	2cWT-2cKO	0	0	0	0	0	0	0	840.864	155.921	0	0	874.346	1244.28	0	0	3.9346	0	0	0	0	0	0	0	0	0	0	0	0	0	0	0	0	0	72.6608	31.5797	0
B3A_dup37687	165.186	-18.5963	1.85196	-10.0415	1.00176e-23	7.44979e-21	Down	B3A	B2	SINE	B3A:B2:SINE	8cWT-2cWT:8cKO-2cKO	2cWT-2cKO	0	0	0	0	0	0	0	704.224	1446.6	0	0	1578.68	0	1916.45	14.0467	0.874356	9.71002	0	0	0.414461	0.738936	0	0.121452	0	0.14008	0.146004	0	0	2.19535	0	129.451	151.404	43.2935	47.076	66.3174	0
B3A_dup38930	117.944	-17.7183	3.08144	-5.75003	8.92302e-09	4.31594e-07	Down	B3A	B2	SINE	B3A:B2:SINE	8cWT-8cKO:8cWT-2cWT	2cWT-2cKO	0	0	0	0	0	0	1036.39	662.181	8.66229	0	0	2270.87	0	357.892	0	14.4269	0	0	0	0	0.246312	0	0	0	0	0	0	0	0	0	13.2509	0	0	0	0	0
B3A_dup46541	52.2135	-16.9122	2.74643	-6.15788	7.37244e-10	4.24462e-08	Down	B3A	B2	SINE	B3A:B2:SINE	8cWT-2cWT:8cKO-2cKO	2cWT-2cKO	0	0	0	0	0	0	1036.39	252.259	372.479	0	0	0	0	0	0.244291	0	0	0.210491	0	0	0	0	0	2.6727	0	0	5.74961	0	0	246.151	0	6.27115	9.47045	0	0	0
B3A_dup63377	111.733	-16.787	2.87093	-5.84724	4.99795e-09	2.53419e-07	Down	B3A	B2	SINE	B3A:B2:SINE	8cWT-2cWT	2cWT-2cKO	0	0	0	0	0	0	0	0	935.528	0	0	2076.57	937.247	46.1796	0	0	0.091604	0	0	7.11492	0	0	0	0	0	0	0	0	0	0	8.1544	100.338	0	0	22.8953	0
B3A_dup74564	52.872	-16.9731	2.82047	-6.01783	1.76769e-09	9.61881e-08	Down	B3A	B2	SINE	B3A:B2:SINE	8cWT-2cWT:8cKO-2cKO	2cWT-2cKO	0	0	0	0	0	0	0	294.303	8.66229	0	1069	242.874	0	0	0	0	0	0	0	0	0.246312	0	0	0	0	0.146004	8.21373	0	0	0	210.995	0	0	0	118.424	3.39941
B3A_dup75036	51.8881	-13.6789	2.6979	-5.07019	3.97413e-07	1.34084e-05	Down	B3A	B2	SINE	B3A:B2:SINE	8cWT-2cWT:8cKO-2cKO	2cWT-2cKO	0	0	0	0	0	0	0	1177.21	0	0	0	36.4311	0	0	0	0	0	0	0	0	0	0	0	0	0	0	0.821373	0	0	0	161.049	72.5662	83.8812	53.2164	0	0
B3A_dup87217	75.9707	-18.2567	2.85981	-6.38387	1.72667e-10	1.07754e-08	Down	B3A	B2	SINE	B3A:B2:SINE	8cWT-2cWT	2cWT-2cKO	0	0	0	0	0	0	980.672	0	692.983	0	0	0	0	785.054	17.8332	0	4.12218	0	0	0	0.246312	0	0	0.235827	0	0	0	0	0	185.82	0	74.358	0	69.5907	0	0
B4_dup37594	182.461	-16.5272	2.98261	-5.5412	3.00414e-08	1.292e-06	Down	B4	B4	SINE	B4:B4:SINE	8cWT-2cWT:8cKO-2cKO	2cWT-2cKO	0	0	0	0	0	0	0	0	0	5633.4	147.449	24.2874	339.348	230.898	35.0557	0	0	0	0	0	0	0	0	4.87375	0	0	0	0	0	253.39	116.2	0	0	0	0	0
B4_dup46251	42.5202	-17.3011	2.03299	-8.51021	1.7362e-17	4.15193e-15	Down	B4	B4	SINE	B4:B4:SINE	8cWT-2cWT	2cWT-2cKO	0	0	0	0	0	0	0	0	173.246	0	0	1141.51	145.435	23.0898	0	4.37178	0	1.68393	0	0	0	0	3.88647	0.235827	0.280159	0.292008	0	0	0	0	23.4439	31.3558	10.8234	0	0	13.5976
B4_dup47930	51.8548	-17.3485	3.1408	-5.5236	3.32119e-08	1.40466e-06	Down	B4	B4	SINE	B4:B4:SINE	8cWT-2cWT	2cWT-2cKO	0	0	0	0	0	0	679.784	0	450.439	0	258.035	400.742	0	0	0	0	0	0	0	2.48677	0	0	0	0	0	0	8.76131	0	0	0	0	110.193	0	8.18714	0	0
B4A_dup25547	16.9224	-6.3763	1.28543	-4.96043	7.03388e-07	2.28256e-05	Down	B4A	B4	SINE	B4A:B4:SINE	NA	2cWT-2cKO:8cKO-2cKO	0	0.511321	0	2.77932	0	0	0	0	0	0	0	0	0	23.0898	4.15295	42.5156	18.7788	20.2071	42.8617	69.9058	9.35985	46.1952	61.9406	60.8433	69.6196	40.4431	26.5577	23.77	10.4889	0	0	0	0	0	52.1066	0
B4A_dup34588	68.9777	-19.3361	2.56512	-7.53809	4.76921e-14	5.91118e-12	Down	B4A	B4	SINE	B4A:B4:SINE	8cWT-2cWT	2cWT-2cKO	0	0	0	0	0	0	11.144	0	0	0	0	1177.94	0	704.239	21.6197	0.327883	0	0.210491	0.0925739	0.138154	27.8333	0	0	0	0	0	0	0	0	299.242	186.532	0	113.645	9.21053	0	0
B4A_dup35199	106.171	-19.3818	1.87694	-10.3263	5.35968e-25	5.03471e-22	Down	B4A	B4	SINE	B4A:B4:SINE	8cWT-8cKO:8cWT-2cWT	2cWT-2cKO	0	0	0	0	0	0	200.592	0	242.544	0	3428.18	0	0	0	5.61869	9.9458	6.9619	0	0.648017	3.592	11.084	0	0	1.7294	11.3464	0.292008	0	0.143193	0	0	3.0579	1.79176	0	0	0.789493	0
B4A_dup35654	21.9042	-6.34335	1.78961	-3.54454	0.000393299	0.00620106	Down	B4A	B4	SINE	B4A:B4:SINE	8cWT-2cWT	2cWT-2cKO	0	0	0	0	0	0	0	0	0	43.6697	0	12.1437	16.1594	0	32.6128	0.218589	3.66416	0	0.185148	0	25.8628	9.87822	0	20.3597	0.14008	43.3631	112.528	0.143193	36.5892	0	99.8914	95.8591	0	0	104.213	152.973
B4A_dup41047	77.4647	-17.1833	2.81549	-6.10312	1.04016e-09	5.83798e-08	Down	B4A	B4	SINE	B4A:B4:SINE	8cWT-2cWT:8cKO-2cKO	2cWT-2cKO	0	0	0	0	0	0	144.872	52.554	2070.29	0	0	291.449	0	11.5449	0	0	10.168	0	0	0	0	0	0	0	0	0	0	0	0	0	0	0.895879	143.41	0	134.214	6.79881
B4A_dup70539	75.5386	-17.5203	2.00865	-8.72244	2.7228e-18	7.47639e-16	Down	B4A	B4	SINE	B4A:B4:SINE	8cWT-8cKO:8cWT-2cWT	2cWT-2cKO	0	0	0	0	0	0	11.144	0	0	43.6697	0	1226.51	0	1431.57	0	1.53012	0	0	9.25739	0	0	4.35804	0	0	0.14008	4.08811	0	0	1.21964	509.194	4.0772	17.0217	0	4.09357	26.8428	16.997
B4A_dup77688	3.76255	-17.8038	3.11051	-5.72376	1.04189e-08	4.95647e-07	Down	B4A	B4	SINE	B4A:B4:SINE	NA	2cWT-2cKO:8cWT-8cKO	0	0	0	0	0	0	0	0	0	0	0	0	0	0	1.22145	0	0	0	0	0	0	0	13.7241	0.471653	0	4.08811	2.46412	5.29813	4.87856	0	285.404	0	0	0	120.792	0
B4A_dup87847	139.453	-16.7312	2.91003	-5.7495	8.95083e-09	4.31768e-07	Down	B4A	B4	SINE	B4A:B4:SINE	8cWT-2cWT	2cWT-2cKO	0	0	0	0	0	0	0	0	0	3318.9	0	1323.66	371.667	0	0	0	0	0	0	0	21.9218	0	0	0	0.560318	4.96413	0	0	0.243928	0	2.0386	42.1063	0	73.6842	0	0
B4A_dup91338	121.326	-16.1706	2.35795	-6.85792	6.98716e-12	5.85478e-10	Down	B4A	B4	SINE	B4A:B4:SINE	8cWT-2cWT:8cKO-2cKO	2cWT-2cKO	0	0	0	0	0	0	724.36	0	1351.32	0	0	1299.38	565.58	173.174	0	0	0	0	0	0	0	0.871608	0	0	0	0.146004	0	0	4.14678	265.457	100.911	2.68764	0	1.02339	0	0
ID_B1_dup20874	42.3518	-16.9185	3.46826	-4.87809	1.07116e-06	3.33067e-05	Down	ID_B1	B4	SINE	ID_B1:B4:SINE	8cWT-2cWT	2cWT-2cKO	0	0	0	0	0	0	0	1072.1	0	0	0	0	0	138.539	0	0	0	0	0	7.87477	0	0	0	0.0786089	0	0	0	0	0	0	93.7756	0	179.939	74.7076	0	0
ID_B1_dup20964	27.5562	-18.3908	2.38138	-7.72276	1.13841e-14	1.58736e-12	Down	ID_B1	B4	SINE	ID_B1:B4:SINE	8cWT-2cWT:8cKO-2cKO	2cWT-2cKO	0	0	0	0	0	0	0	0	251.206	0	0	109.293	32.3188	0	7.32873	0	0.091604	0	1.7589	1.86508	12.8082	0	0	0	0.14008	0	0.547582	0	0.487856	0	0	0	0	0	106.582	0
ID_B1_dup31604	55.9645	-16.9568	2.49163	-6.80551	1.0069e-11	7.98714e-10	Down	ID_B1	B4	SINE	ID_B1:B4:SINE	8cWT-2cWT	2cWT-2cKO	0	0	0	0	0	0	0	462.475	0	0	0	1032.21	484.783	11.5449	0	0	0.091604	0	0	0	0	0	0	0.157218	8.12462	0	0	0	0	0	0	40.3146	0	19.4444	2.36848	0
ID_B1_dup34148	53.7877	-16.2857	2.85888	-5.69654	1.2226e-08	5.69739e-07	Down	ID_B1	B4	SINE	ID_B1:B4:SINE	8cWT-2cWT:8cKO-2cKO	2cWT-2cKO	0	0	0	0	0	0	0	10.5108	848.905	0	0	0	807.971	0	0	0	0	0	0	0	0	0	0	0	0	0	5.20203	0	0	0	81.544	2.68764	183.997	5.11696	44.2116	0
ID_B1_dup41321	63.2882	-16.9284	2.2614	-7.4858	7.11108e-14	8.57557e-12	Down	ID_B1	B4	SINE	ID_B1:B4:SINE	8cWT-2cWT:8cKO-2cKO	2cWT-2cKO	0	0	0	0	0	0	1537.87	94.5972	112.61	87.3395	0	0	80.7971	0	0	0	0	0	2.31435	4.42092	0.246312	0	0	0	0	0	0.821373	0.286386	0	0	23.4439	0	242.173	0	154.741	0
ID_B1_dup50226	10.5626	-3.90904	1.21613	-3.21432	0.00130754	0.0160723	Down	ID_B1	B4	SINE	ID_B1:B4:SINE	NA	2cWT-2cKO:8cKO-2cKO	9.33477	0	0	0	0	0	11.144	0	0	0	0	0	0	0	18.8104	20.1102	33.069	53.6752	14.9044	35.1601	21.4291	0	69.1063	26.1768	0.14008	17.8125	42.1638	12.3146	0.731784	0	0	2.68764	0	2.04678	0	0
ID_B1_dup50296	222.716	-17.1345	1.99831	-8.57449	9.95257e-18	2.46713e-15	Down	ID_B1	B4	SINE	ID_B1:B4:SINE	8cWT-8cKO:8cWT-2cWT:8cKO-2cKO	2cWT-2cKO	0	0	0	0	0	0	0	0	433.115	4061.28	2359.18	1202.23	0	0	0	3.9346	0.183208	0	0	1.58877	0	0	0	0.864698	1.54088	2.04405	0	0	0	9.65297	0	66.2951	83.8812	0	5.52645	0
ID_B1_dup66087	50.0791	-14.6218	2.79851	-5.22486	1.74291e-07	6.34844e-06	Down	ID_B1	B4	SINE	ID_B1:B4:SINE	8cWT-2cWT:8cKO-2cKO	2cWT-2cKO	0	0	0	0	0	0	0	756.778	840.242	0	0	133.581	0	0	0	0	0	0	0	0	0	0	0	0	0	1.46004	0	0	0	0	74.4089	0.895879	10.8234	0	34.7377	0
ID_B1_dup73743	84.8754	-16.5299	2.39562	-6.90005	5.1983e-12	4.52582e-10	Down	ID_B1	B4	SINE	ID_B1:B4:SINE	8cWT-8cKO:8cWT-2cWT	2cWT-2cKO	0	0	0	0	0	0	0	0	1455.27	0	0	1238.66	371.667	34.6347	0	0.218589	0	0	0	0	0	0	0	5.89567	0	0	0	0	0	2.41324	10.193	0	17.588	3.07018	0.789493	0
ID_B1_dup80632	90.3816	-18.63	2.88117	-6.46611	1.00555e-10	6.55018e-09	Down	ID_B1	B4	SINE	ID_B1:B4:SINE	8cWT-2cWT	2cWT-2cKO	0	0	0	0	0	0	0	672.692	86.6229	43.6697	0	0	0	2435.98	0	0	12.3665	16.6288	0	0	0.246312	0	0	0	0	0	0	0	0	9.65297	7.1351	59.128	0	0	0	0
ID_B1_dup92433	67.0705	-11.3589	2.39097	-4.75077	2.02645e-06	6.05832e-05	Down	ID_B1	B4	SINE	ID_B1:B4:SINE	8cWT-2cWT:8cKO-2cKO	2cWT-2cKO	0	0	0	0	0	0	1058.68	0	433.115	0	552.932	0	0	219.353	0	0	0.091604	0	0	0	0	0	0	0	0	0	0	0	0	0	132.509	78.8374	1.35292	0	4.73696	0
RSINE1_dup101643	6.39118	-5.84252	2.09616	-2.78725	0.00531577	0.0450289	Down	RSINE1	B4	SINE	RSINE1:B4:SINE	NA	2cWT-2cKO	0	0	0	0	0	0	0	0	0	0	0	0	0	0	5.74084	0	4.94662	0	11.6643	4.49	36.9468	0.290536	1.57888	14.464	0	63.3657	35.319	0	22.9292	0	0	0	0	0	34.7377	0
RSINE1_dup30848	61.4975	-18.8523	2.3182	-8.13229	4.21268e-16	7.59474e-14	Down	RSINE1	B4	SINE	RSINE1:B4:SINE	8cWT-2cWT:8cKO-2cKO	2cWT-2cKO	0	0	0	0	0	0	0	1576.62	0	0	36.8621	0	32.3188	0	0	0.109294	0	0	0	0	2.95574	4.93911	0.728713	2.90853	0	4.81813	21.0819	0	0	0	159.011	269.66	0	37.8655	125.529	0
RSINE1_dup49103	372.834	-19.6662	2.93064	-6.71055	1.93888e-11	1.454e-09	Down	RSINE1	B4	SINE	RSINE1:B4:SINE	8cWT-2cWT	2cWT-2cKO	0	0	0	0	0	0	0	10.5108	0	0	11390.4	1360.09	0	611.88	0	0	0	0	0	13.47	0	44.1615	8.13729	0	0	0	0	0	0	330.614	20.386	1.79176	0	0	0	3.39941
RSINE1_dup55351	9.13049	-4.64586	1.59215	-2.91798	0.00352308	0.0333401	Down	RSINE1	B4	SINE	RSINE1:B4:SINE	NA	2cWT-2cKO	0	0	0	0	0	1.17156	0	0	0	0	0	0	0	0	3.05364	1.9673	10.2596	0	15.8301	6.00969	17.4881	0.290536	9.83762	6.76036	10.2258	15.9144	0.273791	0	28.7835	0	61.158	0	0	32.7485	116.056	0
RSINE1_dup58115	59.3695	-4.18614	1.4971	-2.79617	0.00517126	0.0441751	Down	RSINE1	B4	SINE	RSINE1:B4:SINE	8cWT-2cWT	2cWT-2cKO	0	0	0	0	5.2858	1.17156	0	31.5324	17.3246	0	36.8621	704.334	16.1594	531.066	25.5284	9.9458	0.91604	76.1977	0.925739	0.0690769	0	2.03375	0	0	0.280159	0.438011	67.3526	6.30048	25.3685	395.772	7.1351	60.9198	28.4114	38.8889	86.0548	20.3964
RSINE1_dup62942	54.1866	-17.8027	2.91624	-6.1047	1.02996e-09	5.81729e-08	Down	RSINE1	B4	SINE	RSINE1:B4:SINE	8cWT-2cWT	2cWT-2cKO	0	0	0	0	0	0	713.216	0	0	43.6697	0	1214.37	0	0	0	0	0.366416	0	0	0	0	0	0	0.0786089	0	0	15.3323	0	23.661	0	1.0193	8.95879	0	0	7.89493	0
RSINE1_dup81670	110.892	-17.234	3.05357	-5.64387	1.66268e-08	7.53184e-07	Down	RSINE1	B4	SINE	RSINE1:B4:SINE	8cWT-2cWT	2cWT-2cKO	0	0	0	0	0	0	0	0	0	0	589.794	643.616	2472.39	0	5.74084	0.109294	0	0	0	0	0	0.581072	0	0	0	0	0	0	4.63463	0	281.327	104.818	0	0	0	0
RSINE1_dup86105	4.45953	-5.38121	1.66881	-3.22459	0.00126154	0.0156687	Down	RSINE1	B4	SINE	RSINE1:B4:SINE	NA	2cWT-2cKO	0	0	0	0	0	0	0	0	0	0	0	0	0	0	0	0.655767	31.6034	0	8.1465	0.552615	0.246312	0	13.7241	4.00905	27.8758	38.399	0	0.715964	20.49	2.41324	0	0.895879	4.05877	2.04678	0	0
RSINE1_dup87923	63.7863	-15.5065	2.89339	-5.35927	8.35602e-08	3.25629e-06	Down	RSINE1	B4	SINE	RSINE1:B4:SINE	8cWT-2cWT:8cKO-2cKO	2cWT-2cKO	0	0	0	0	0	0	78.008	1082.61	0	0	0	1068.65	0	0	0	0	0	0	2.1292	0	0	0	0	0.628871	0	0	0	0	0	0	30.579	26.8764	0	70.614	0	0
ID2_dup4040	242.984	-13.6763	2.27535	-6.01062	1.84815e-09	1.00261e-07	Down	ID2	ID	SINE	ID2:ID:SINE	8cWT-8cKO:8cWT-2cWT:8cKO-2cKO	2cWT-2cKO	0	0	0	0	0	0	0	483.497	0	7118.17	36.8621	582.897	0	588.79	0	0.327883	0	0	0	0.0690769	0	0	0	0.235827	0	0	0	0	0	0	117.219	0	0	41.9591	0	20.3964
ID4_dup11895	83.7243	-16.7788	3.71144	-4.52083	6.15973e-06	0.00016708	Down	ID4	ID	SINE	ID4:ID:SINE	8cWT-2cWT	2cWT-2cKO	0	0	0	0	0	0	546.056	420.432	0	1877.8	0	194.299	0	0	0	0	0	0	0	7.25308	0	0	0	0	0	0	0	0	0	0	0	51.961	0	0	0	0
ID4_dup2736	19.2425	-18.6963	2.43823	-7.66799	1.74716e-14	2.36238e-12	Down	ID4	ID	SINE	ID4:ID:SINE	8cWT-2cWT:8cKO-2cKO	2cWT-2cKO	0	0	0	0	0	0	0	115.619	0	0	36.8621	0	0	11.5449	2.44291	0	0	0	0.0925739	2.07231	0	0	0.971617	0	0	20.0025	0	5.72771	0	427.144	0	55.5445	0	0	33.9482	0
ID4_dup616	34.7811	-16.2894	2.94159	-5.53764	3.06579e-08	1.31219e-06	Down	ID4	ID	SINE	ID4:ID:SINE	8cWT-2cWT	2cWT-2cKO	0	0	0	0	0	0	0	262.77	407.128	0	0	546.466	0	0	0	1.09294	0.183208	0	0.925739	3.17754	0	0	0	0	0	0	0	0	0	65.1576	0	0	0	0	0	0
ID4__dup13275	131.848	-17.1962	2.615	-6.57599	4.8332e-11	3.34352e-09	Down	ID4_	ID	SINE	ID4_:ID:SINE	8cWT-2cWT:8cKO-2cKO	2cWT-2cKO	0	0	0	0	0	0	0	273.281	692.983	0	0	2234.44	0	1443.11	1.71004	7.8692	0	0	0.185148	0	0	0	0	0	0	0	0	0.143193	0	217.192	6.1158	0	1.35292	0	0	0
ID4__dup19963	74.7942	-12.3002	2.02447	-6.07575	1.2341e-09	6.86177e-08	Down	ID4_	ID	SINE	ID4_:ID:SINE	8cWT-2cWT:8cKO-2cKO	2cWT-2cKO	0	0	0	0	0	0	22.288	1839.39	554.387	0	0	36.4311	177.754	0	0	0	0	0	0	0	0	0	0.121452	0.0786089	0	0	0	0	0	9.65297	50.965	0	0	36.8421	39.4747	0
MIR_dup35318	8.54949	-5.55099	1.79767	-3.08788	0.0020159	0.0223339	Down	MIR	MIR	SINE	MIR:MIR:SINE	NA	2cWT-2cKO	0	0	0	0	0	0	0	10.5108	0	0	0	0	0	0	1.58789	0.109294	18.1376	12.8399	9.07224	5.52615	0	0	0	14.6999	16.1092	33.5809	0.273791	6.0141	46.8342	0	85.6212	0	0	1.02339	0	54.3905
MIR3_dup10504	122.544	-15.8437	2.37035	-6.68412	2.32313e-11	1.7063e-09	Down	MIR3	MIR	SINE	MIR3:MIR:SINE	8cWT-2cWT:8cKO-2cKO	2cWT-2cKO	0	0	0	0	0	0	0	136.64	0	0	1032.14	2999.49	32.3188	0	0	0	0	0	2.96237	0	0	0	0	0	0	0.146004	0	0.429578	0	4.82649	189.59	2.68764	0	0	129.477	3.39941
MIR3_dup5238	14.007	-5.13166	1.40437	-3.65406	0.000258128	0.00436964	Down	MIR3	MIR	SINE	MIR3:MIR:SINE	8cWT-8cKO:8cWT-2cWT	2cWT-2cKO:8cKO-2cKO	0	1.02264	0	0	0	0	0	0	8.66229	0	36.8621	242.874	0	11.5449	0	8.41568	19.3284	39.9933	21.1069	0	0.492624	10.1688	18.0964	10.5336	28.5762	13.7244	10.6779	1.43193	30.0032	0	2.0386	0	2.70584	0	0	0
MIRb_dup25292	70.6786	-11.4487	2.37578	-4.81892	1.44336e-06	4.4143e-05	Down	MIRb	MIR	SINE	MIRb:MIR:SINE	8cWT-2cWT:8cKO-2cKO	2cWT-2cKO	0	0	0	0	0	0	0	546.562	398.465	0	0	1505.82	0	11.5449	0	0.109294	0	0	0	0	0	0	0	0	0	0	0	0	0	0	43.8299	86.9003	1.35292	0	20.5268	0
MIRb_dup28623	128.173	-18.8162	2.4629	-7.63986	2.17452e-14	2.91811e-12	Down	MIRb	MIR	SINE	MIRb:MIR:SINE	8cWT-2cWT	2cWT-2cKO	0	0	0	0	0	0	0	0	1377.3	0	0	522.179	1535.15	992.862	7.20658	0	0.091604	0.210491	0.0925739	0	0	0	0	8.80419	0	0	1.36896	16.7536	0	263.043	17.3281	0	0	0	0	0
MurSatRep1_dup751	81.0067	-11.3044	2.7073	-4.17552	2.97302e-05	0.00067338	Down	MurSatRep1	MurSatRep1	Unknown	MurSatRep1:MurSatRep1:Unknown	8cWT-2cWT:8cKO-2cKO	2cWT-2cKO	0	0	0	0	0	0	0	1009.04	1481.25	0	0	12.1437	0	150.084	0	0	0	0	0	0	0	0	0	0	0	0	0	0.143193	0	0	166.146	0	0	0	36.3167	0
MER63C_dup79	213.275	3.02288	1.10097	2.74565	0.00603912	0.0492886	Up	MER63C	hAT-Blackjack	DNA	MER63C:hAT-Blackjack:DNA	2cWT-2cKO:8cWT-2cWT:8cKO-2cKO	NA	0	21.9868	0.832132	8.33796	0	5.85782	323.176	2039.1	1108.77	305.688	479.208	910.777	129.275	1339.21	0	0	0	0	0.925739	4.62815	0.738936	2.03375	0	0.70748	0.560318	0	0.547582	1.43193	0	434.384	75.4282	151.404	0	85.9649	283.428	176.769
Charlie8_dup264	16.4717	6.52339	2.16787	3.00913	0.00262001	0.0268657	Up	Charlie8	hAT-Charlie	DNA	Charlie8:hAT-Charlie:DNA	2cWT-2cKO:8cKO-2cKO	NA	87.5135	114.536	0	0	0	0	11.144	0	0	0	0	48.5748	0	0	0	0	0	0	0	0	0	0	0.364356	4.32349	0	0	0	0.715964	0	31.3722	162.069	0	6.76461	93.1287	48.9486	0
MER102b_dup489	43.0807	8.82526	2.75201	3.20683	0.00134204	0.0163947	Up	MER102b	hAT-Charlie	DNA	MER102b:hAT-Charlie:DNA	2cWT-2cKO:8cKO-2cKO	NA	30.338	0	0	163.98	0	0	0	483.497	346.492	0	0	340.023	0	103.904	0	0	0	0	0	0	0	0	0	0.864698	0	0.146004	0	0	0	0	0	0	0	0	124.74	0
MER103C_dup110	67.2145	4.38484	1.52303	2.87903	0.00398901	0.0364546	Up	MER103C	hAT-Charlie	DNA	MER103C:hAT-Charlie:DNA	2cWT-2cKO:8cKO-2cKO	NA	25.6706	64.9378	0.832132	0	259.004	4.68626	0	42.0432	25.9869	0	0	1250.8	0	496.431	0.977164	0	3.29774	2.94687	0	0	0	0.290536	4.73663	1.57218	2.52143	17.9585	0.547582	0	7.56177	16.8927	110.084	0	104.175	42.9825	0	0
MER20_dup2161	512.133	2.95828	1.06954	2.76594	0.00567598	0.0471193	Up	MER20	hAT-Charlie	DNA	MER20:hAT-Charlie:DNA	2cWT-2cKO:8cWT-8cKO:8cWT-2cWT:8cKO-2cKO	NA	386.226	56.7566	130.645	2.77932	338.291	0	1816.47	262.77	1957.68	698.716	7261.84	1542.25	1405.87	796.599	14.6575	0	9.34361	36.8359	0	13.6772	25.8628	64.7895	0	6.44593	0.280159	9.34424	53.1155	22.6245	37.5649	839.808	225.265	416.584	0	86.9883	255.796	3.39941
MER20_dup868	60.2041	24.5932	3.07523	7.99717	1.27309e-15	2.1039e-13	Up	MER20	hAT-Charlie	DNA	MER20:hAT-Charlie:DNA	2cWT-2cKO:8cKO-2cKO	NA	42.0065	69.0283	69.8991	0	0	0	234.024	0	0	0	0	0	403.986	1293.03	0	0	0	0	0	0	0	0	0	0	0	0	0	0	0	0	0	0	0	0	0	115.58
RCHARR1_dup6696	56.7231	8.2098	1.96576	4.1764	2.96154e-05	0.000671634	Up	RCHARR1	hAT-Charlie	DNA	RCHARR1:hAT-Charlie:DNA	2cWT-2cKO:8cWT-2cWT:8cKO-2cKO	NA	19.8364	0	0	0	0	0	0	788.31	493.751	0	0	12.1437	0	357.892	0	0	0	0	0	0	0	0	0	0	0	0	0.273791	0	0	168.927	73.3896	60.0239	109.587	1.02339	0	13.5976
URR1A_dup11548	10.1448	8.50265	2.46375	3.4511	0.000558315	0.00829709	Up	URR1A	hAT-Charlie	DNA	URR1A:hAT-Charlie:DNA	2cWT-2cKO:8cKO-2cKO	NA	136.521	98.685	2.4964	0	0	0	0	10.5108	8.66229	0	3944.25	0	0	0	0	0	0	0	0	0.828923	0	0	0	0	0	0	12.0468	0	0	431.97	104.988	0	0	0	11.8424	0
URR1A_dup7107	156.157	8.94113	1.61979	5.51992	3.39148e-08	1.431e-06	Up	URR1A	hAT-Charlie	DNA	URR1A:hAT-Charlie:DNA	2cWT-2cKO:8cWT-2cWT:8cKO-2cKO	NA	47.8407	62.3812	1.66426	0	0	79.6664	0	136.64	0	2663.85	1290.17	12.1437	323.188	785.054	0	0	0	0.210491	0	0	0.492624	0	0	0	0	0	0	0	0.731784	2.41324	201.821	5.37527	0	0	67.8964	0
URR1B_dup6205	291.961	6.33183	2.00284	3.16143	0.00156997	0.0183726	Up	URR1B	hAT-Charlie	DNA	URR1B:hAT-Charlie:DNA	2cWT-2cKO:8cWT-2cWT:8cKO-2cKO	NA	0	4.60189	0	0	0	0	0	31.5324	17.3246	1484.77	1990.56	1517.96	4960.94	11.5449	0	0	0	0	0	0	0	0	0	0	0	0	0	0	0.243928	292.002	0	55.5445	431.582	0	3.94747	0
URR1B_dup6488	170.676	3.85641	1.21895	3.16371	0.00155771	0.0182754	Up	URR1B	hAT-Charlie	DNA	URR1B:hAT-Charlie:DNA	2cWT-2cKO:8cKO-2cKO	NA	3.50054	1.02264	8.32132	525.292	449.293	57.4066	0	63.0648	1810.42	87.3395	36.8621	1262.94	0	0	2.07647	6.0112	0	0.210491	1.01831	0	31.0353	0.581072	0.364356	5.26679	15.829	0.146004	47.6396	15.4648	54.6399	200.299	193.667	146.028	37.8818	55.2632	302.376	224.361
URR1B_dup6640	5.72725	6.78513	2.45475	2.76408	0.00570842	0.0472779	Up	URR1B	hAT-Charlie	DNA	URR1B:hAT-Charlie:DNA	2cWT-2cKO:8cKO-2cKO	NA	0	34.2585	40.7745	0	0	0	0	10.5108	0	5327.71	0	0	0	69.2694	1.22145	0	3.11454	0	0	0	0	0.290536	0	0	0	0	0	0	0	48.2649	7.1351	0	0	0	0	0
FordPrefect_dup212	54.1683	4.69932	0.993466	4.73023	2.24266e-06	6.63797e-05	Up	FordPrefect	hAT-Tip100	DNA	FordPrefect:hAT-Tip100:DNA	2cWT-2cKO:8cWT-8cKO:8cWT-2cWT:8cKO-2cKO	NA	2.33369	0.511321	0	0	2.6429	0	178.304	178.684	372.479	131.009	184.311	400.742	113.116	196.263	0	0	0	0	0	0	0.246312	0	0	0	0	0	0	0	0	28.9589	27.5211	20.6052	5.41169	84.9415	46.5801	20.3964
FordPrefect_dup223	69.467	3.45464	1.137	3.03837	0.00237858	0.0250608	Up	FordPrefect	hAT-Tip100	DNA	FordPrefect:hAT-Tip100:DNA	2cWT-2cKO:8cWT-8cKO:8cWT-2cWT:8cKO-2cKO	NA	0	0	0	0	0	1.17156	234.024	231.238	199.233	480.367	479.208	449.317	64.6377	196.263	0.122145	0	0	0	0	0	0	0	0	0	0	0	0	0	0	79.637	30.579	31.3558	21.6467	2.04678	41.0537	23.7958
FordPrefect_dup264	257649	4.41014	0.555365	7.94097	2.00604e-15	3.22558e-13	Up	FordPrefect	hAT-Tip100	DNA	FordPrefect:hAT-Tip100:DNA	2cWT-2cKO:8cWT-8cKO:8cWT-2cWT:8cKO-2cKO	NA	1407.22	3152.81	725.619	3390.77	602.581	3565.07	463691	964293	976232	679501	1.72021e+06	2.25e+06	675496	1.02163e+06	22.5969	37.0508	26.0155	40.6248	27.9573	14.5062	406.661	87.1608	25.3835	22.4821	162.352	35.4789	206.712	103.672	292.958	156581	126457	155302	61240	42810.5	125687	67372.8
Kanga1_dup238	61.9742	5.21624	1.57417	3.31365	0.000920857	0.0122015	Up	Kanga1	TcMar-Tc2	DNA	Kanga1:TcMar-Tc2:DNA	2cWT-2cKO:8cWT-2cWT:8cKO-2cKO	NA	4.66739	0	0	41.6898	0	0	11.144	1124.66	77.9606	0	110.586	24.2874	96.9565	230.898	0	0	1.09925	0	0.185148	0	0	0	0	0	0	0	1.09516	0	0.731784	320.961	34.6562	194.406	2.70584	4.09357	10.2634	0
MER44A_dup565	61.3412	18.3456	2.72857	6.72353	1.77375e-11	1.34144e-09	Up	MER44A	TcMar-Tigger	DNA	MER44A:TcMar-Tigger:DNA	2cWT-2cKO:8cWT-2cWT:8cKO-2cKO	NA	0	0	0	2.77932	0	0	156.016	10.5108	0	0	0	680.047	1001.88	0	0	0	0	0	0	0	0	0	0	0	0	0	0	0	0	296.829	0	50.1692	0	0	0	71.3875
Tigger7_dup2408	821.75	2.81851	0.945319	2.98154	0.00286799	0.0287411	Up	Tigger7	TcMar-Tigger	DNA	Tigger7:TcMar-Tigger:DNA	2cWT-2cKO:8cWT-2cWT:8cKO-2cKO	NA	308.047	54.7114	203.04	186.214	219.361	58.5782	1939.06	1271.81	3326.32	10786.4	0	2003.71	2019.93	3313.39	0.366436	10.8202	0.091604	77.6712	11.3866	0.0690769	37.4394	81.0596	0.121452	2.35827	1.68096	0.292008	61.8768	33.3639	46.8342	1182.49	1268.01	305.495	28.4114	532.164	628.437	275.352
L3_dup1324	198.71	2.92157	1.0247	2.85116	0.00435603	0.0390293	Up	L3	CR1	LINE	L3:CR1:LINE	2cWT-2cKO:8cWT-2cWT:8cKO-2cKO	NA	222.868	88.9699	136.47	0	26.429	0	222.88	1597.64	493.751	567.706	36.8621	1080.79	16.1594	1627.83	17.3447	4.37178	0.183208	17.0498	1.20346	3.31569	40.8878	7.55394	16.396	19.3378	7.5643	0.292008	10.4041	11.3122	0	243.738	163.088	268.764	9.47045	17.3977	374.22	0
L3_dup6128	269.023	2.26739	0.796683	2.84603	0.00442674	0.0394896	Up	L3	CR1	LINE	L3:CR1:LINE	2cWT-2cKO:8cWT-2cWT:8cKO-2cKO	NA	112.017	154.419	352.824	277.932	5.2858	120.671	1961.34	430.943	762.282	43.6697	184.311	1590.82	436.304	785.054	19.9097	90.6051	26.3819	80.8285	12.4975	2.07231	20.4439	15.3984	6.19406	19.888	1.68096	66.7237	121.016	41.0963	7.07391	912.206	111.104	461.378	1.35292	47.076	5.52645	234.559
L3_dup694	875.68	3.56673	0.819105	4.35442	1.3342e-05	0.000332117	Up	L3	CR1	LINE	L3:CR1:LINE	2cWT-2cKO:8cWT-8cKO:8cWT-2cWT:8cKO-2cKO	NA	301.046	116.07	16.6426	5.55864	163.86	110.127	746.648	6842.53	3620.84	174.679	6524.6	2562.32	1987.61	5218.3	11.1152	3.9346	3.93897	13.2609	2.59207	0.138154	1.23156	6.68233	5.22244	5.97427	0.280159	0.146004	86.518	3.72301	6.58606	822.916	1209.91	357.456	366.642	195.468	409.747	37.3935
L3_dup7240	669.256	2.52126	0.674295	3.7391	0.000184679	0.00331939	Up	L3	CR1	LINE	L3:CR1:LINE	2cWT-2cKO:8cWT-8cKO:8cWT-2cWT:8cKO-2cKO	NA	171.526	284.295	188.894	86.1589	0	193.308	144.872	5591.75	1775.77	4585.32	0	2343.73	1664.42	4086.9	28.4599	25.6842	39.8477	37.6779	12.1272	18.0291	60.5927	0.581072	11.6594	30.343	40.7632	11.0963	12.0468	20.047	54.8838	316.135	353.697	421.063	120.41	295.76	825.021	836.254
L3_dup8450	609.176	2.78554	0.719453	3.87175	0.000108056	0.00210544	Up	L3	CR1	LINE	L3:CR1:LINE	2cWT-2cKO:8cWT-8cKO:8cWT-2cWT:8cKO-2cKO	NA	54.8418	255.149	124.82	2.77932	87.2157	323.352	2139.65	3037.62	2512.06	1266.42	2359.18	2817.34	129.275	4687.23	32.6128	17.4871	27.6644	21.2596	19.0702	0.0690769	48.7698	16.8511	6.67987	5.89567	27.8758	0.146004	50.9251	16.8967	16.5871	704.667	545.325	373.582	282.761	191.374	274.744	47.5917
L3_dup8909	20.0006	7.26714	2.29875	3.16134	0.00157044	0.0183726	Up	L3	CR1	LINE	L3:CR1:LINE	2cWT-2cKO:8cKO-2cKO	NA	0	0	137.302	0	0	0	0	367.878	0	0	36.8621	0	0	0	0	0	18.046	0.631473	0	0	0.246312	0	0.121452	0	0.14008	1.02203	0	0	0	24.1324	99.8914	0	71.7049	0	0	0
L3b_dup413	25.3	7.46192	2.23184	3.34339	0.000827613	0.0112005	Up	L3b	CR1	LINE	L3b:CR1:LINE	2cWT-2cKO:8cKO-2cKO	NA	57.1755	0	0	0	0	227.283	0	0	8.66229	0	2174.87	24.2874	0	277.078	0	0	0	3.36786	0	0	0.246312	0	0.121452	0.0786089	0	0	0	0.286386	0	0	0	166.634	0	98.2456	72.6334	0
HAL1ME_dup177	18.4535	6.8044	2.0936	3.25009	0.00115368	0.0146451	Up	HAL1ME	L1	LINE	HAL1ME:L1:LINE	2cWT-2cKO:8cKO-2cKO	NA	3.50054	17.3849	153.112	0	0	0	256.312	42.0432	0	0	0	0	16.1594	126.994	0	0.218589	0	0	0	0	0	0	0	0	0	0.146004	0	0	3.65892	0	27.5211	34.9393	0	0	0.789493	0
L1_Mm_dup2767	15.1806	5.93421	1.85171	3.20473	0.0013519	0.0164814	Up	L1_Mm	L1	LINE	L1_Mm:L1:LINE	2cWT-2cKO:8cKO-2cKO	NA	0	162.6	2.4964	0	0	1.17156	0	0	0	0	36.8621	12.1437	0	0	0	0	2.3817	0	0	0	2.21681	2.03375	0	0	0	0.146004	0	0.143193	0	41.0251	2.0386	70.7744	90.6458	0	135.003	0
L1_Mur3_dup24280	64.1917	12.2748	2.32773	5.27329	1.33998e-07	5.04557e-06	Up	L1_Mur3	L1	LINE	L1_Mur3:L1:LINE	2cWT-2cKO:8cKO-2cKO	NA	1.16685	0	0	277.932	0	0	913.808	10.5108	0	0	0	449.317	0	357.892	0	0	0	0	0	0	0	0	0	0	0.14008	0	0	0	0	0	136.586	117.36	0	106.433	3.94747	0
L1_Mus1_dup14975	942.566	4.32567	0.904901	4.78027	1.75058e-06	5.2867e-05	Up	L1_Mus1	L1	LINE	L1_Mus1:L1:LINE	2cWT-2cKO:8cWT-8cKO:8cWT-2cWT:8cKO-2cKO	NA	49.0076	2.55661	4.16066	316.843	0	4.68626	4769.63	2680.26	4313.82	8209.91	2322.31	3193.79	985.725	4029.17	4.76367	0.437178	4.5802	0.210491	0	5.66431	1.23156	0.290536	1.09307	0.157218	7.28414	0.292008	4.65445	2.14789	13.9039	999.082	1542.2	256.221	39.2347	61.4035	279.481	727.473
L1_Mus1_dup19367	274.164	5.00875	1.78912	2.79956	0.00511729	0.0439229	Up	L1_Mus1	L1	LINE	L1_Mus1:L1:LINE	2cWT-2cKO:8cWT-8cKO:8cKO-2cKO	NA	0	4.60189	114.834	191.773	0	14.0588	0	1261.3	519.738	3362.57	3059.56	157.868	0	1108.31	0.366436	0	0.091604	6.10424	0	0	0	17.1416	0.121452	0	0	0	1.64275	0	0	45.8516	1.0193	172.905	0	0	104.213	0
L1_Mus1_dup19378	707.504	4.32045	1.23535	3.49736	0.000469887	0.00717333	Up	L1_Mus1	L1	LINE	L1_Mus1:L1:LINE	2cWT-2cKO:8cWT-2cWT:8cKO-2cKO	NA	3.50054	23.5208	163.098	2.77932	0	0	1259.27	3479.08	3309	305.688	1290.17	8913.47	678.696	3163.3	0.366436	0	0	0.631473	0	0.0690769	6.1578	0	0	0.157218	0	0.146004	0.821373	0	16.3432	1059.41	311.906	615.469	127.175	163.743	1128.19	132.577
L1_Mus1_dup8079	180.3	7.03792	2.27584	3.09246	0.00198508	0.0220471	Up	L1_Mus1	L1	LINE	L1_Mus1:L1:LINE	2cWT-2cKO:8cWT-8cKO	NA	0	165.157	0	0	0	0	0	10.5108	892.216	0	1437.62	3570.25	0	588.79	1.58789	0	0	1.26295	0	0.0690769	0	0	0	0	0	0	0	0	0.243928	0	0	0	0	0	0	3.39941
L1_Mus2_dup16235	241.563	6.02012	1.86467	3.22852	0.00124435	0.0154983	Up	L1_Mus2	L1	LINE	L1_Mus2:L1:LINE	2cWT-2cKO:8cWT-2cWT:8cKO-2cKO	NA	0	79.7661	0	0	0	0	1459.86	861.886	0	2358.17	1400.76	1469.39	0	923.593	0	0	0.091604	0	0	0	0.985248	0	0	0	0	0	0	0	2.19535	24.1324	92.7563	87.7962	0	143.275	33.1587	0
L1_Mus2_dup9485	75.9549	16.7059	2.50151	6.67831	2.41719e-11	1.76812e-09	Up	L1_Mus2	L1	LINE	L1_Mus2:L1:LINE	2cWT-2cKO:8cWT-2cWT:8cKO-2cKO	NA	0	0.511321	0	0	0	0	0	21.0216	1793.09	87.3395	0	0	0	0	0	0	0	0	0	0	0	0	0	0	0	0	0	0	0	516.434	174.3	68.9827	0	0	101.055	47.5917
L1_Mus3_dup13934	10.0457	3.48806	0.503886	6.92232	4.44316e-12	3.90647e-10	Up	L1_Mus3	L1	LINE	L1_Mus3:L1:LINE	2cWT-2cKO:8cWT-8cKO:8cWT-2cWT:8cKO-2cKO	NA	14.0022	2.04528	4.99279	16.6759	18.5003	7.02939	11.144	42.0432	34.6492	0	36.8621	72.8622	16.1594	34.6347	0.610727	0.327883	1.19085	0.420982	0.925739	0.276308	0.492624	0.871608	0.485809	0.786089	0.420239	2.04405	1.09516	0.859157	2.43928	12.0662	3.0579	0.895879	2.70584	3.07018	7.89493	3.39941
L1MA4_dup1559	220.792	4.75962	1.68552	2.82383	0.00474533	0.041619	Up	L1MA4	L1	LINE	L1MA4:L1:LINE	2cWT-2cKO:8cWT-8cKO	NA	213.533	20.9642	122.323	0	0	0	0	872.397	173.246	6375.78	0	0	290.87	34.6347	0.122145	0.765061	0	3.57835	0.0925739	5.24985	0.246312	0	0.485809	0.471653	0	0.146004	0	21.7653	0	0	4.0772	27.7723	0	0	0.789493	0
L1MA5_dup1322	26.0592	6.4119	2.12877	3.01201	0.00259521	0.0267278	Up	L1MA5	L1	LINE	L1MA5:L1:LINE	2cWT-2cKO	NA	2.33369	0	0	433.574	0	1.17156	0	0	103.948	174.679	0	0	0	219.353	0.610727	0	7.14511	0	0	0	0	0	0	0.314435	0	4.38011	0	0.286386	0	0	13.2509	1.79176	1.35292	0	0	0
L1MA5A_dup744	189.724	2.54897	0.876641	2.90766	0.00364144	0.0341526	Up	L1MA5A	L1	LINE	L1MA5A:L1:LINE	2cWT-2cKO	8cWT-2cWT	1302.2	1619.87	420.227	188.994	158.574	234.313	22.288	725.246	17.3246	43.6697	73.7243	24.2874	32.3188	23.0898	63.0271	115.634	74.474	74.0928	170.336	104.721	13.5472	137.714	109.55	124.438	22.2727	279.597	191.38	59.8546	136.6	429.557	4.0772	0.895879	2.70584	2.04678	2.36848	10.1982
L1MA6_dup3119	67.2239	3.91745	1.20141	3.2607	0.00111137	0.0142703	Up	L1MA6	L1	LINE	L1MA6:L1:LINE	2cWT-2cKO:8cWT-8cKO	8cKO-2cKO	196.03	104.821	497.615	352.974	13.2145	451.052	0	10.5108	303.18	218.349	0	0	0	69.2694	6.10727	4.0439	26.6568	12.8399	6.66532	64.7941	0	29.6347	0	25.8623	0	42.6331	11.4992	0	36.5892	0	0	0.895879	0	2.04678	0	0
L1MB1_dup1138	11.1827	6.85156	1.91054	3.58619	0.000335539	0.00544923	Up	L1MB1	L1	LINE	L1MB1:L1:LINE	2cWT-2cKO:8cKO-2cKO	NA	2.33369	40.9057	11.6499	0	0	0	0	42.0432	0	0	0	850.059	0	0	0.244291	0	0.274812	0	0	0.0690769	0	0	0	5.81706	0	0	0	0	0	0	2.0386	0	22.9997	0	86.8443	203.964
L1MB7_dup137	64.4171	6.47154	1.96556	3.29247	0.000993113	0.0129759	Up	L1MB7	L1	LINE	L1MB7:L1:LINE	2cWT-2cKO:8cKO-2cKO	NA	124.853	9.7151	0	0	0	0	0	735.756	225.22	0	0	85.0059	1066.52	0	0	0.109294	0	0	0.277722	0.0690769	0	0	0	0	0	0	0.547582	0	2.92714	0	3.0579	108.401	16.2351	0	4.73696	0
L1MB7_dup2646	141.798	7.1058	1.5331	4.63493	3.57064e-06	0.000101157	Up	L1MB7	L1	LINE	L1MB7:L1:LINE	2cWT-2cKO:8cWT-2cWT:8cKO-2cKO	NA	0	38.3491	0.832132	0	0	0	2295.66	851.375	0	43.6697	626.656	376.454	0	207.808	0.122145	0	0	0	0	0.138154	0	0	0	0.0786089	0	0	0	0.143193	0	301.655	25.4825	70.7744	79.8224	0	322.903	0
L1MB8_dup5179	71.3839	7.6916	2.52254	3.04915	0.00229493	0.0244246	Up	L1MB8	L1	LINE	L1MB8:L1:LINE	2cWT-2cKO:8cKO-2cKO	NA	193.697	51.1321	1.66426	0	0	0	0	0	1048.14	0	1105.86	85.0059	0	0	0	0.546472	0	0	0	2.34861	0	0	0	0	0	0	0	0	0	0	134.548	8.06291	0	0	0	10.1982
L1Md_A_dup12159	32.6671	2.77587	0.400463	6.93164	4.15977e-12	3.71218e-10	Up	L1Md_A	L1	LINE	L1Md_A:L1:LINE	2cWT-2cKO:8cWT-8cKO:8cWT-2cWT:8cKO-2cKO	NA	9.33477	10.2264	9.15346	44.4691	13.2145	17.5735	100.296	126.13	155.921	174.679	36.8621	85.0059	113.116	150.084	2.44291	1.20224	1.74048	5.89375	0.833165	1.03615	1.23156	4.64858	1.57888	2.27966	1.82103	1.89805	5.47582	1.28874	3.41499	26.5457	18.3474	22.397	14.8821	10.2339	9.47392	10.1982
L1Md_A_dup7350	14.6911	2.78231	0.912814	3.04805	0.0023033	0.0244698	Up	L1Md_A	L1	LINE	L1Md_A:L1:LINE	2cWT-2cKO:8cWT-8cKO:8cKO-2cKO	NA	8.16793	16.8736	0	27.7932	10.5716	0	0	31.5324	43.3115	0	0	97.1495	210.073	11.5449	1.71004	0.218589	10.9009	1.26295	1.11089	0.0690769	0.246312	0.871608	1.57888	1.41496	0	0.730019	0.273791	0.859157	0.975712	4.82649	6.1158	17.9176	24.3526	6.14035	1.57899	3.39941
L1Md_F_dup2060	16.5848	2.68952	0.526172	5.11148	3.19652e-07	1.10138e-05	Up	L1Md_F	L1	LINE	L1Md_F:L1:LINE	2cWT-2cKO:8cWT-8cKO:8cWT-2cWT:8cKO-2cKO	NA	10.5016	3.57925	4.16066	11.1173	2.6429	15.2303	22.288	52.554	138.597	0	0	133.581	32.3188	126.994	0.488582	0.655767	1.64887	2.10491	1.48118	0.690769	0	1.74322	1.21452	1.49357	0.14008	0.584015	1.91654	1.57512	2.68321	12.0662	9.1737	5.37527	5.41169	3.07018	3.15797	3.39941
L1Md_F_dup592	49.5095	2.73615	0.329904	8.29378	1.09702e-16	2.25053e-14	Up	L1Md_F	L1	LINE	L1Md_F:L1:LINE	2cWT-2cKO:8cWT-8cKO:8cWT-2cWT:8cKO-2cKO	NA	40.8396	18.9189	24.1318	66.7037	39.6435	25.7744	89.152	157.662	121.272	174.679	368.621	133.581	177.754	219.353	3.54222	3.27883	5.58784	6.10424	4.72127	1.86508	1.72418	7.55394	4.85809	8.56837	3.36191	3.9421	6.57099	7.15964	9.75712	21.7192	7.1351	16.1258	10.8234	15.3509	12.6319	6.79881
L1Md_F2_dup44698	188.959	20.6876	2.23374	9.26143	2.0172e-20	8.37279e-18	Up	L1Md_F2	L1	LINE	L1Md_F2:L1:LINE	2cWT-2cKO:8cWT-2cWT:8cKO-2cKO	NA	11.6685	0	0	0	0	0	0	504.519	277.193	0	5861.08	194.299	0	0	0	0	0	0	0	0	0	0	0	0	0	0	0	0	0	0	4.0772	18.8135	74.4107	39.9123	5.52645	0
L1Md_F2_dup52803	161.17	3.33466	1.11696	2.98547	0.00283142	0.0284706	Up	L1Md_F2	L1	LINE	L1Md_F2:L1:LINE	2cWT-2cKO:8cWT-8cKO:8cWT-2cWT:8cKO-2cKO	NA	124.853	8.18114	143.959	11.1173	0	1.17156	936.096	315.324	1082.79	87.3395	2654.07	85.0059	0	34.6347	1.58789	0.218589	5.77105	12.8399	0	6.07877	5.17255	0	0.485809	6.99619	2.52143	1.16803	10.4041	2.29108	16.5871	222.018	164.107	10.7505	2.70584	2.04678	1.57899	3.39941
L1Md_F3_dup2	600.285	1.49681	0.494231	3.02856	0.0024572	0.0256819	Up	L1Md_F3	L1	LINE	L1Md_F3:L1:LINE	2cWT-2cKO:8cWT-8cKO:8cWT-2cWT:8cKO-2cKO	NA	94.5146	75.1642	74.0598	130.628	161.217	105.441	1103.26	1765.82	2269.52	2620.18	5234.42	2489.46	1583.62	2666.87	16.3675	18.6894	18.3208	174.497	18.6999	7.66754	15.764	45.9047	21.8614	113.904	9.52541	11.3883	39.9735	18.9014	34.3939	323.375	222.207	184.551	109.587	162.719	132.635	84.9851
L1Md_F3_dup4539	196.997	5.86788	1.14065	5.14431	2.68501e-07	9.41493e-06	Up	L1Md_F3	L1	LINE	L1Md_F3:L1:LINE	2cWT-2cKO:8cWT-2cWT:8cKO-2cKO	NA	203.031	204.017	0	0	2.6429	0	1270.42	147.151	216.557	131.009	73.7243	3327.37	129.275	69.2694	0.122145	0.109294	0	0.420982	0.833165	0.276308	10.8377	0.581072	0.485809	1.17913	0	1.16803	0.821373	0.572771	0.487856	475.409	289.481	26.8764	211.056	9.21053	191.057	0
L1Md_T_dup11920	8.28881	2.56491	0.583016	4.39938	1.08563e-05	0.000275622	Up	L1Md_T	L1	LINE	L1Md_T:L1:LINE	2cWT-2cKO:8cWT-8cKO:8cWT-2cWT:8cKO-2cKO	NA	10.5016	4.60189	5.82493	8.33796	2.6429	10.5441	11.144	52.554	51.9738	0	0	48.5748	16.1594	34.6347	0.977164	0.109294	2.01529	0.631473	1.57376	0.276308	0	2.90536	0.971617	3.38018	0.980557	0.584015	0.821373	1.28874	1.46357	7.23973	3.0579	9.85467	1.35292	1.02339	8.68443	0
L1Md_T_dup18258	12524.8	2.46847	0.277422	8.89788	5.69224e-19	1.78237e-16	Up	L1Md_T	L1	LINE	L1Md_T:L1:LINE	2cWT-2cKO:8cWT-8cKO:8cWT-2cWT:8cKO-2cKO	NA	2708.25	1865.3	1858.98	2406.89	3916.78	2306.81	20872.7	43777.5	46637.8	44281.1	76857.6	69680.5	43420.4	66440.9	427.753	352.256	371.363	722.826	323.083	258.348	474.643	932.33	298.408	408.059	280.439	281.641	604.257	494.731	573.231	5835.22	6142.3	4317.24	2782.96	2194.15	4134.58	2641.34
L1Md_T_dup20989	6.02913	7.15879	2.22338	3.21977	0.00128292	0.015857	Up	L1Md_T	L1	LINE	L1Md_T:L1:LINE	2cWT-2cKO:8cKO-2cKO	NA	0	21.9868	0	0	0	0	11.144	0	0	0	0	0	0	34.6347	0	0	0	0	0	0	0	0	0	0	0	0	0	0	0	74.8105	20.386	12.5423	0	38.8889	8.68443	0
L1ME2_dup2495	30.2597	7.35067	2.1798	3.37218	0.000745754	0.0104067	Up	L1ME2	L1	LINE	L1ME2:L1:LINE	2cWT-2cKO:8cKO-2cKO	NA	0	31.1906	0	0	0	19.9166	267.456	283.792	17.3246	0	0	0	0	473.341	0	0	0	0	0	0	0.985248	0	0	0.0786089	0	0	0	0	0	0	8.1544	0	0	0	17.3689	0
L1ME4a_dup150	87.9434	6.69999	1.87706	3.5694	0.000357794	0.00575686	Up	L1ME4a	L1	LINE	L1ME4a:L1:LINE	2cWT-2cKO:8cKO-2cKO	NA	35.0054	92.5491	119.827	0	10.5716	0	0	0	0	1310.09	0	1505.82	0	46.1796	0.122145	0.218589	0	1.89442	0	0	0	0	0.121452	0.471653	0	0	0	57.5635	0.243928	24.1324	2.0386	0	101.469	0	0	0
L1MEd_dup1558	314.587	6.5139	1.14981	5.66522	1.46834e-08	6.71975e-07	Up	L1MEd	L1	LINE	L1MEd:L1:LINE	2cWT-2cKO:8cWT-8cKO:8cWT-2cWT:8cKO-2cKO	NA	60.676	3.06793	0	2.77932	549.723	1.17156	356.608	1166.7	2191.56	174.679	1400.76	2234.44	371.667	2493.7	0.610727	0.437178	0.824436	0	0	0.0690769	2.70943	0	0.121452	0.393044	0	0	0.547582	10.8827	0.243928	50.6781	187.551	21.5011	198.88	112.573	33.9482	10.1982
Lx_dup11879	84.6567	5.648	1.81555	3.1109	0.00186516	0.0210426	Up	Lx	L1	LINE	Lx:L1:LINE	2cWT-2cKO:8cWT-2cWT:8cKO-2cKO	NA	0	25.5661	0	0	0	1.17156	1994.78	0	77.9606	0	0	218.586	64.6377	357.892	0	0.437178	0	0	0	0.207231	0	0.290536	0	0	0.14008	0.146004	0	0.143193	0	349.92	11.2123	0	0	0	29.2113	0
Lx_dup23391	69.7536	8.29285	1.93886	4.27717	1.89282e-05	0.000451994	Up	Lx	L1	LINE	Lx:L1:LINE	2cWT-2cKO:8cWT-2cWT:8cKO-2cKO	NA	0	0	0	0	2.6429	18.745	156.016	178.684	103.948	87.3395	0	0	0	1928	0	0	0	0	0	0	0	0.290536	0	0	0	0	0	0	0	9.65297	30.579	3.58352	0	61.4035	0	0
Lx2A1_dup1877	29.0819	2.66515	0.423583	6.29192	3.13565e-10	1.89071e-08	Up	Lx2A1	L1	LINE	Lx2A1:L1:LINE	2cWT-2cKO:8cWT-8cKO:8cWT-2cWT:8cKO-2cKO	NA	7.00108	5.62453	12.482	44.4691	15.8574	17.5735	66.864	94.5972	216.557	87.3395	0	72.8622	113.116	196.263	2.32076	1.63942	1.83208	4.20982	2.1292	1.03615	1.47787	7.84447	1.09307	2.82992	1.54088	2.19006	3.28549	2.14789	3.17107	16.8927	13.2509	14.3341	6.76461	10.2339	15.0004	10.1982
Lx2B2_dup4231	26.163	3.07088	0.497573	6.17171	6.75537e-10	3.92736e-08	Up	Lx2B2	L1	LINE	Lx2B2:L1:LINE	2cWT-2cKO:8cWT-8cKO:8cWT-2cWT:8cKO-2cKO	NA	16.3359	9.7151	5.82493	36.1312	39.6435	15.2303	11.144	42.0432	25.9869	43.6697	184.311	157.868	113.116	161.629	2.07647	1.85801	2.74812	2.10491	2.40692	0.759846	4.67993	5.22965	2.06469	0.550262	0.420239	2.48207	2.19033	2.29108	3.65892	21.7192	2.0386	3.58352	5.41169	6.14035	15.0004	6.79881
Lx3_Mus_dup5745	151.334	6.12679	1.77891	3.44412	0.000572926	0.00845766	Up	Lx3_Mus	L1	LINE	Lx3_Mus:L1:LINE	2cWT-2cKO:8cKO-2cKO	NA	0	0	1.66426	236.242	0	0	791.224	31.5324	1472.59	174.679	0	582.897	0	1754.83	2.56505	0	1.00764	3.57835	0.370296	0	0.246312	0	0	0.550262	0	0.146004	0	0	0	28.9589	344.523	3.58352	0	0	168.162	0
Lx3A_dup1015	92.2082	3.84823	1.14309	3.36652	0.000761243	0.0105569	Up	Lx3A	L1	LINE	Lx3A:L1:LINE	2cWT-2cKO:8cWT-8cKO:8cKO-2cKO	NA	2.33369	140.102	92.3667	52.8071	0	15.2303	11.144	819.843	952.852	393.028	110.586	121.437	0	369.437	14.5353	0	7.05351	4.42031	6.94304	10.2234	1.47787	1.45268	2.42904	0.0786089	0.280159	0	0.273791	0	3.41499	0	151.876	102.13	4.05877	3.07018	13.4214	3.39941
Lx3C_dup1900	15.0108	6.66496	2.07763	3.20797	0.00133676	0.0163733	Up	Lx3C	L1	LINE	Lx3C:L1:LINE	2cWT-2cKO:8cKO-2cKO	NA	0	0	62.4099	0	0	0	0	0	0	0	36.8621	12.1437	161.594	0	0	0	0	0	0	0	0	0	0	0	0	0.292008	1.64275	0	0	31.3722	80.5247	82.4209	0	4.09357	71.8439	10.1982
Lx4A_dup9867	11.6938	7.80891	2.7858	2.80312	0.00506116	0.0435807	Up	Lx4A	L1	LINE	Lx4A:L1:LINE	2cWT-2cKO:8cKO-2cKO	NA	12.8353	0	27.4604	0	0	0	0	115.619	216.557	0	0	0	0	0	0	0	0	20.4176	0	0	0	0	0	0	0	0	0.273791	0	0	0	50.965	8.95879	0	0	0	0
Lx5_dup3006	263.639	4.61093	1.13778	4.05258	5.06557e-05	0.00109456	Up	Lx5	L1	LINE	Lx5:L1:LINE	2cWT-2cKO:8cWT-8cKO:8cWT-2cWT:8cKO-2cKO	NA	36.1722	3.57925	2.4964	0	0	0	289.744	1135.17	1732.46	0	3428.18	837.915	113.116	1766.37	0	0.109294	0.091604	0.631473	0	0.207231	0	0	0.242904	0	0	0	2.73791	0.286386	0.487856	33.7854	201.821	105.714	18.9409	20.4678	20.5268	3.39941
Lx7_dup11448	372.205	2.988	1.04015	2.87266	0.00407033	0.0370838	Up	Lx7	L1	LINE	Lx7:L1:LINE	2cWT-2cKO:8cWT-8cKO:8cWT-2cWT:8cKO-2cKO	NA	241.537	1.02264	70.7312	161.201	5.2858	1.17156	780.08	336.346	736.295	3231.56	0	2100.86	3652.03	865.868	6.96229	0.327883	19.1452	0	0.185148	0.759846	13.3008	14.5268	0.121452	10.6908	22.9731	0	32.3073	29.7841	0.487856	31.3722	301.713	301.015	224.585	30.7018	236.059	3.39941
Lx7_dup17867	57.3825	20.6034	2.77234	7.43178	1.07149e-13	1.24181e-11	Up	Lx7	L1	LINE	Lx7:L1:LINE	2cWT-2cKO:8cKO-2cKO	NA	0	0.511321	0	0	0	10.5441	1393	0	0	0	0	121.437	0	0	0	0	0	0	0	0	0	0	0	0	0	0	0	0	0	294.416	226.285	9.85467	0	0	67.1069	0
Lx8_dup31268	141.017	2.54369	0.845211	3.00953	0.0026165	0.0268541	Up	Lx8	L1	LINE	Lx8:L1:LINE	2cWT-2cKO:8cWT-8cKO:8cWT-2cWT:8cKO-2cKO	NA	169.193	4.09057	23.2997	19.4552	187.646	23.4313	11.144	136.64	1056.8	43.6697	184.311	1821.55	355.507	450.251	19.0547	6.33908	22.901	2.73638	23.1435	15.7495	0.246312	15.3984	3.52211	12.0272	11.0663	16.0604	7.39236	20.3334	6.34213	248.564	66.2545	186.343	0	15.3509	28.4218	3.39941
Lx8_dup6597	110.381	7.53165	2.69284	2.79692	0.00515921	0.0441215	Up	Lx8	L1	LINE	Lx8:L1:LINE	2cWT-2cKO:8cWT-2cWT:8cKO-2cKO	NA	4.66739	5.62453	0	0	0	0	0	588.605	0	0	0	206.443	2423.91	0	0	0	0	0	0	0	0	0	0	0	0	0	0	0.143193	0	535.74	1.0193	0	317.937	0	0	0
Lx8b_dup2856	48.4575	3.482	1.06142	3.28051	0.0010362	0.0134404	Up	Lx8b	L1	LINE	Lx8b:L1:LINE	2cWT-2cKO	NA	476.073	137.034	232.165	138.966	5.2858	114.813	356.608	10.5108	0	0	0	12.1437	0	0	1.58789	0.327883	6.22907	10.735	0.555443	6.63138	36.2079	0	14.3314	24.1329	34.3195	6.42417	66.5312	2.43428	37.0771	0	2.0386	9.85467	4.05877	7.16374	38.6852	0
Lx9_dup37710	250.424	5.52461	1.77646	3.10989	0.00187155	0.021088	Up	Lx9	L1	LINE	Lx9:L1:LINE	2cWT-2cKO:8cWT-8cKO:8cWT-2cWT:8cKO-2cKO	NA	0	10.2264	258.793	0	0	0	0	189.194	1429.28	0	73.7243	2246.58	0	4895.04	5.13011	1.31153	0	1.05245	0	0	0.492624	0	0	0	0.14008	0.146004	6.0234	0.429578	0	19.3059	21.4053	40.3146	0	0	67.1069	0
Lx9_dup44558	32.6296	9.68272	2.51868	3.84436	0.000120868	0.00231466	Up	Lx9	L1	LINE	Lx9:L1:LINE	2cWT-2cKO:8cKO-2cKO	NA	106.183	10.7377	0	52.8071	0	0	0	0	563.049	174.679	0	0	242.391	0	0	0	0	0	0.0925739	0	0	0	0	0	0	0	0.273791	0	0	0	57.0808	0	0	0	0	0
Lx9_dup6685	344.141	5.20995	1.4978	3.4784	0.000504414	0.0076037	Up	Lx9	L1	LINE	Lx9:L1:LINE	2cWT-2cKO:8cWT-8cKO:8cWT-2cWT:8cKO-2cKO	NA	0	58.8019	0	197.332	2.6429	0	468.048	10.5108	2226.21	6768.81	294.897	898.633	1082.68	461.796	0.488582	8.41568	0	0.210491	0	0	0	0	0.121452	0.235827	0	5.69415	0	2.14789	0	12.0662	0	8.06291	79.8224	25.5848	120.003	0
MusHAL1_dup663	37.2654	5.73361	1.8215	3.14774	0.00164539	0.019057	Up	MusHAL1	L1	LINE	MusHAL1:L1:LINE	2cWT-2cKO:8cWT-2cWT:8cKO-2cKO	NA	0	1.02264	0	8.33796	0	0	44.576	241.749	0	0	0	680.047	16.1594	0	0	0	0	0	0	0	0	0	0	0	0	0	0	0	0	4.82649	43.8299	31.3558	117.704	147.368	41.8432	0
L2_dup12193	171.012	2.30297	0.466007	4.94192	7.73568e-07	2.47856e-05	Up	L2	L2	LINE	L2:L2:LINE	2cWT-2cKO:8cWT-8cKO:8cWT-2cWT:8cKO-2cKO	NA	38.5059	101.753	28.2925	80.6003	31.7148	29.2891	557.2	483.497	641.01	218.349	405.484	1335.81	791.812	658.06	11.3595	2.62307	8.51917	7.15669	7.31334	10.776	5.41886	18.5943	19.9182	21.8533	4.06231	18.6885	4.10687	13.4601	3.17107	101.356	184.493	140.653	93.3516	45.0292	75.0019	129.177
L2_dup5233	516.637	1.70764	0.611515	2.79248	0.00523065	0.0444767	Up	L2	L2	LINE	L2:L2:LINE	2cWT-2cKO:8cWT-8cKO:8cWT-2cWT:8cKO-2cKO	NA	423.565	202.483	572.507	47.2484	203.503	62.0929	0	2091.65	2217.55	4235.96	1327.04	267.161	1632.1	1570.11	88.9219	48.9639	37.9241	182.075	69.9859	79.3003	43.5972	84.8365	32.6706	27.6703	126.352	13.5784	113.35	57.4203	152.455	468.169	701.278	162.154	802.283	100.292	666.332	88.3845
L2_dup5795	129.256	4.07008	1.2346	3.29669	0.000978325	0.0128202	Up	L2	L2	LINE	L2:L2:LINE	2cWT-2cKO:8cWT-8cKO	NA	256.706	115.559	186.398	13.8966	2.6429	236.656	0	199.705	2130.92	87.3395	0	740.765	355.507	46.1796	8.55018	0	2.93133	1.89442	0	0.967077	15.764	3.1959	0	20.4383	0.980557	9.49025	32.0336	23.6268	1.21964	2.41324	232.4	9.85467	0	1.02339	43.4221	0
L2_dup6146	39.8709	2.65971	0.960877	2.76801	0.00564003	0.0469474	Up	L2	L2	LINE	L2:L2:LINE	2cWT-2cKO:8cWT-8cKO	8cKO-2cKO	173.86	428.487	77.3883	5.55864	63.4296	127.7	0	220.727	0	0	0	24.2874	0	0	49.8353	35.0835	5.58784	29.8897	29.5311	28.5288	39.1636	16.27	0	18.7875	3.22183	36.647	49.83	1.00235	4.14678	2.41324	3.0579	0	0	0	0.789493	0
L2a_dup15215	160.235	8.09717	2.49522	3.24507	0.00117421	0.0148528	Up	L2a	L2	LINE	L2a:L2:LINE	2cWT-2cKO:8cWT-8cKO	NA	0	74.1416	45.7673	0	0	0	0	1072.1	0	0	3317.59	1311.52	96.9565	0	0	0	0.549624	0	0	0	0	0.581072	0	0	0	0	0	0	0	0	0	0	0	0	9.47392	0
L2a_dup2469	24.7739	2.73052	0.466901	5.84819	4.96963e-09	2.52701e-07	Up	L2a	L2	LINE	L2a:L2:LINE	2cWT-2cKO:8cWT-8cKO:8cWT-2cWT:8cKO-2cKO	NA	14.0022	4.09057	4.16066	44.4691	21.1432	8.20095	11.144	105.108	103.948	87.3395	221.173	24.2874	64.6377	115.449	2.44291	1.20224	1.92368	2.52589	2.4995	0.759846	1.72418	3.48643	2.7934	3.77323	1.4008	1.46004	1.36896	3.29343	2.19535	24.1324	5.0965	6.27115	4.05877	5.11696	3.15797	6.79881
L2b_dup3253	171.032	9.16138	2.14747	4.26613	1.98896e-05	0.000470808	Up	L2b	L2	LINE	L2b:L2:LINE	2cWT-2cKO:8cKO-2cKO	NA	131.854	0	0	0	0	0	523.768	1786.84	1871.06	0	0	667.903	0	1073.68	0	0	0	0	0	0	0	0.290536	0	0	0	0.146004	0	0	0.243928	0	79.5054	0	182.644	0	10.2634	0
L2c_dup11353	532.956	4.78522	1.47996	3.23335	0.00122348	0.015324	Up	L2c	L2	LINE	L2c:L2:LINE	2cWT-2cKO:8cWT-8cKO:8cWT-2cWT:8cKO-2cKO	NA	59.5092	0	0.832132	0	303.934	17.5735	2317.95	63.0648	658.334	305.688	5455.6	4213.86	1761.38	3648.19	0	0	7.78634	0	0	10.2234	5.17255	0.581072	0	0	0	0.292008	0	6.0141	4.39071	12.0662	638.082	0	189.409	5.11696	0	6.79881
L2c_dup8569	54.3485	11.8692	3.00994	3.94335	8.03524e-05	0.00162784	Up	L2c	L2	LINE	L2c:L2:LINE	2cWT-2cKO:8cKO-2cKO	NA	65.3434	0	0	63.9244	0	227.283	0	0	0	0	0	1517.96	0	0	0	15.4105	0	0	0	0	0	0	0	0.0786089	0	0	0	0.143193	0	135.142	1.0193	0	0	0	0	0
LTRIS4B_dup64	231.166	2.04994	0.439523	4.66401	3.10101e-06	8.91254e-05	Up	LTRIS4B	ERV1	LTR	LTRIS4B:ERV1:LTR	2cWT-2cKO:8cWT-8cKO:8cWT-2cWT:8cKO-2cKO	NA	53.6749	34.7698	32.4532	30.5725	74.0012	26.946	312.032	777.8	1065.46	698.716	1585.07	1056.5	743.334	1154.49	8.67233	6.0112	7.87794	10.9455	3.70296	4.42092	5.66517	17.4322	6.92277	43.3135	3.92223	5.54815	10.9516	7.30283	8.29356	111.009	273.172	70.7744	75.7636	40.9357	51.3171	64.5887
MERV1_I-int_dup537	1179.04	2.34017	0.640743	3.65228	0.000259925	0.00439135	Up	MERV1_I-int	ERV1	LTR	MERV1_I-int:ERV1:LTR	2cWT-2cKO:8cWT-8cKO:8cWT-2cWT:8cKO-2cKO	NA	77.0119	463.257	191.39	266.815	39.6435	219.083	6987.29	2890.47	2927.85	4148.62	2469.76	10346.4	1777.54	4756.5	21.4976	53.5543	26.7484	1.68393	26.4761	16.9238	47.7845	163.572	2.30759	3.5374	6.02342	56.0655	115.266	55.4156	25.6125	2669.05	334.33	586.801	193.468	253.801	399.484	448.722
MMERGLN-int_dup81	816.606	1.86266	0.568614	3.27579	0.00105369	0.0136153	Up	MMERGLN-int	ERV1	LTR	MMERGLN-int:ERV1:LTR	2cWT-2cKO:8cWT-8cKO:8cWT-2cWT:8cKO-2cKO	NA	631.264	462.234	110.674	0	37.0006	290.548	2585.41	3090.18	3057.79	1703.12	516.07	546.466	3021.81	6823.04	166.973	64.9209	67.2373	97.2468	35.8261	75.0866	38.4247	52.0059	44.9373	80.1024	44.8255	82.6382	102.945	56.418	46.5903	1131.81	965.277	1223.77	1122.93	167.836	1308.19	142.775
MMERGLN-int_dup812	21.5199	7.57352	1.46307	5.17644	2.26154e-07	7.97706e-06	Up	MMERGLN-int	ERV1	LTR	MMERGLN-int:ERV1:LTR	2cWT-2cKO:8cWT-8cKO	NA	158.691	1.53396	70.7312	0	55.5009	331.553	0	126.13	8.66229	0	0	0	16.1594	11.5449	0	0.655767	1.92368	0	1.94405	0	0	0.290536	0	0.314435	0	0	3.0117	0	0	0	0	0	0	0	0.789493	6.79881
MMVL30-int_dup349	114.934	3.28664	1.01092	3.25114	0.00114944	0.0146016	Up	MMVL30-int	ERV1	LTR	MMVL30-int:ERV1:LTR	2cWT-2cKO:8cKO-2cKO	NA	46.6739	2.04528	138.966	264.035	253.719	32.8038	1236.98	630.648	112.61	0	73.7243	12.1437	48.4783	0	7.81731	29.5095	23.4506	8.63013	0.925739	0.967077	49.755	0.581072	1.09307	13.1277	27.4556	2.77407	0	19.6174	2.92714	48.2649	690.066	180.072	133.939	120.76	14.2109	23.7958
MuLV-int_dup107	1027.47	1.99787	0.662307	3.01653	0.00255688	0.0264399	Up	MuLV-int	ERV1	LTR	MuLV-int:ERV1:LTR	2cWT-2cKO:8cWT-8cKO:8cWT-2cWT:8cKO-2cKO	NA	613.761	435.646	329.524	113.952	177.074	25.7744	1292.7	2196.76	545.724	2096.15	15445.2	2173.72	1680.58	4109.99	48.9803	37.2694	39.0233	141.029	0	55.3306	33.0058	149.917	42.1439	29.95	134.056	77.382	90.8986	70.3077	113.914	2058.5	906.157	1092.08	159.645	330.556	396.326	227.76
MuLV-int_dup74	3264.16	3.00911	0.490394	6.13611	8.45681e-10	4.80692e-08	Up	MuLV-int	ERV1	LTR	MuLV-int:ERV1:LTR	2cWT-2cKO:8cWT-8cKO:8cWT-2cWT:8cKO-2cKO	NA	289.378	414.681	718.13	614.23	256.361	549.464	9349.82	14063.5	11252.3	20961.5	13196.6	19442.1	5817.39	12653.2	92.0977	14.864	62.0159	29.6792	13.7009	19.2034	107.146	144.106	28.1769	68.94	28.8564	24.3826	76.9353	95.5096	78.057	2473.57	3094.59	1146.73	1139.16	652.924	45.7906	1424.35
RLTR1B-int_dup287	944.472	5.02712	1.20268	4.17993	2.91599e-05	0.000663835	Up	RLTR1B-int	ERV1	LTR	RLTR1B-int:ERV1:LTR	2cWT-2cKO:8cWT-2cWT:8cKO-2cKO	NA	0	14.317	0	11.1173	97.7873	0	156.016	3542.14	225.22	2925.87	13675.9	5258.22	3587.39	1362.3	0.244291	0	0.091604	0	4.35097	0.0690769	0	0	0	0	0.280159	4.08811	0	0	0	371.639	1157.92	279.514	719.754	98.2456	566.856	482.716
RLTR1B-int_dup335	10097	3.41994	0.696291	4.91166	9.03072e-07	2.86288e-05	Up	RLTR1B-int	ERV1	LTR	RLTR1B-int:ERV1:LTR	2cWT-2cKO:8cWT-8cKO:8cWT-2cWT:8cKO-2cKO	NA	89.8472	322.644	207.201	569.761	449.293	113.642	17228.6	25310	25060	61268.6	78147.7	55363.1	28133.6	47899.8	1.22145	1.31153	15.5727	10.9455	42.7691	2.41769	0.985248	55.2018	69.7135	18.6303	0.420239	89.7924	60.5078	11.0258	28.5396	9288.57	8032.08	4818.04	2385.2	935.38	4705.38	465.719
RLTR1B-int_dup350	685.997	3.95056	0.984617	4.01228	6.01343e-05	0.00127619	Up	RLTR1B-int	ERV1	LTR	RLTR1B-int:ERV1:LTR	2cWT-2cKO:8cWT-8cKO:8cWT-2cWT:8cKO-2cKO	NA	186.695	330.313	59.0814	97.2762	100.43	114.813	2819.43	1629.17	1013.49	6506.79	2432.9	3011.64	2488.55	1443.11	58.1412	0	0.091604	1.47344	9.25739	0	29.3111	0.871608	10.6878	11.5555	0.14008	0	13.4158	8.87795	0	977.363	478.052	212.323	78.4695	178.07	75.0019	10.1982
RLTR30E_MM_dup131	117.964	3.40304	1.10399	3.08249	0.00205275	0.0226577	Up	RLTR30E_MM	ERV1	LTR	RLTR30E_MM:ERV1:LTR	2cWT-2cKO	NA	268.375	44.9963	92.3667	411.339	0	4.68626	22.288	189.194	970.177	0	0	315.736	0	1466.2	36.0329	35.8486	13.191	8.63013	27.4019	6.21692	0	0	19.1894	3.61601	17.51	4.38011	8.21373	13.3169	0.243928	16.8927	118.239	74.358	0	126.901	35.5272	13.5976
RLTR6-int_dup1001	5.97551	2.99416	0.953351	3.14067	0.00168561	0.0194221	Up	RLTR6-int	ERV1	LTR	RLTR6-int:ERV1:LTR	2cWT-2cKO:8cWT-8cKO	NA	2.33369	2.55661	66.5706	0	2.6429	8.20095	11.144	0	25.9869	0	0	0	48.4783	23.0898	1.09931	3.60672	0	1.89442	0	0.0690769	4.1873	1.16214	1.33597	5.65984	0.700398	0.146004	3.0117	2.86386	0.731784	0	1.0193	0	0	1.02339	1.57899	0
ERVB4_1B-I_MM-int_dup635	125.953	5.82507	1.68364	3.45981	0.000540559	0.00808032	Up	ERVB4_1B-I_MM-int	ERVK	LTR	ERVB4_1B-I_MM-int:ERVK:LTR	2cWT-2cKO:8cWT-8cKO:8cWT-2cWT:8cKO-2cKO	NA	0	0	12.482	2.77932	0	0	0	84.0864	17.3246	43.6697	2396.04	145.724	210.073	1547.02	0	0	0	0	0	0	0	0	0.485809	0	0	0	0	0	0	139.968	34.6562	7.16703	0	6.14035	12.6319	0
ERVB4_2-I_MM-int_dup190	62.6767	7.50997	1.24445	6.03477	1.59189e-09	8.71537e-08	Up	ERVB4_2-I_MM-int	ERVK	LTR	ERVB4_2-I_MM-int:ERVK:LTR	2cWT-2cKO:8cWT-2cWT:8cKO-2cKO	NA	0	64.9378	14.1462	0	0	0	11.144	662.181	103.948	43.6697	73.7243	97.1495	307.029	69.2694	0	0.109294	0	0	0	0	1.23156	0	0	0	0	0.146004	0	0	0	123.075	358.793	77.9415	133.939	9.21053	86.0548	3.39941
ERVB4_2-I_MM-int_dup191	1657.78	7.44657	0.959271	7.76274	8.31166e-15	1.21595e-12	Up	ERVB4_2-I_MM-int	ERVK	LTR	ERVB4_2-I_MM-int:ERVK:LTR	2cWT-2cKO:8cWT-2cWT:8cKO-2cKO	NA	0	209.642	285.421	2.77932	0	0	1537.87	8124.85	1282.02	480.367	4755.22	22028.7	549.42	5068.21	0.244291	1.31153	0.183208	0.210491	0.0925739	0.0690769	1.72418	1.16214	0	0.157218	0.280159	0.292008	0.821373	0	0.975712	2241.9	4527.73	2167.13	1052.57	766.521	3739.83	2281
ERVB4_2-I_MM-int_dup255	34.6582	7.72394	1.44974	5.3278	9.94097e-08	3.81562e-06	Up	ERVB4_2-I_MM-int	ERVK	LTR	ERVB4_2-I_MM-int:ERVK:LTR	2cWT-2cKO:8cKO-2cKO	8cWT-8cKO	51.3412	7.66982	0.832132	0	0	1.17156	0	0	0	0	0	24.2874	0	0	0.122145	0	0	0	0	0.207231	0	0.290536	0	0	0	0	0	0	0	16.8927	630.946	242.783	18.9409	233.333	48.9486	0
ERVB4_2-I_MM-int_dup308	577.385	4.05074	1.32483	3.05755	0.00223156	0.0239644	Up	ERVB4_2-I_MM-int	ERVK	LTR	ERVB4_2-I_MM-int:ERVK:LTR	2cWT-2cKO:8cWT-8cKO:8cWT-2cWT:8cKO-2cKO	NA	2.33369	0	0.832132	0	0	0	1593.59	231.238	363.816	87.3395	10063.4	2878.06	145.435	3809.82	0	0	0.091604	0	0	0	0.492624	0	0	0	0	0	0	0	0	65.1576	1105.94	681.764	16.2351	115.643	104.213	61.1893
ERVB4_2-I_MM-int_dup310	219.88	4.47149	1.46862	3.04469	0.00232924	0.0247013	Up	ERVB4_2-I_MM-int	ERVK	LTR	ERVB4_2-I_MM-int:ERVK:LTR	2cWT-2cKO:8cWT-8cKO:8cWT-2cWT:8cKO-2cKO	NA	0	0.511321	0.832132	0	0	1.17156	156.016	21.0216	8.66229	0	2064.28	4068.14	48.4783	946.682	0	0	0	0	0	0	0	0	0	0	0	0	0	0	0	33.7854	505.573	94.9632	83.8812	14.3275	23.6848	54.3905
ERVB4_2-I_MM-int_dup53	66.5526	6.75713	1.69917	3.97674	6.98678e-05	0.00145013	Up	ERVB4_2-I_MM-int	ERVK	LTR	ERVB4_2-I_MM-int:ERVK:LTR	2cWT-2cKO:8cKO-2cKO	NA	175.027	14.317	0	0	0	0	0	105.108	0	0	0	48.5748	16.1594	34.6347	0	0	0	0	0	0	0	0	0	0.157218	0.14008	0	1.36896	0	2.92714	36.1986	371.025	450.627	385.583	84.9415	731.071	0
ERVB4_2-I_MM-int_dup92	62.4589	9.92444	2.06136	4.81452	1.47555e-06	4.50181e-05	Up	ERVB4_2-I_MM-int	ERVK	LTR	ERVB4_2-I_MM-int:ERVK:LTR	2cWT-2cKO:8cKO-2cKO	NA	0	0	0.832132	403.001	0	0	0	0	0	0	110.586	0	0	23.0898	0.244291	0	0	0	0	0.0690769	0	0.581072	0	0	0	0	0	0	0.243928	1134.22	88.6791	197.989	0	180.117	171.32	0
ERVB4_2-LTR_MM_dup15	50.1964	4.27148	1.22407	3.48956	0.000483807	0.00732981	Up	ERVB4_2-LTR_MM	ERVK	LTR	ERVB4_2-LTR_MM:ERVK:LTR	2cWT-2cKO:8cWT-8cKO:8cWT-2cWT:8cKO-2cKO	NA	0	1.53396	0	0	0	0	78.008	10.5108	129.934	218.349	405.484	340.023	113.116	334.802	0	0	0	0	0	0	0	0	0	0	0	0	0	0	0	24.1324	84.6019	48.3775	17.588	16.3743	27.6323	6.79881
ERVB4_2-LTR_MM_dup24	147.69	6.80655	1.62565	4.18698	2.82694e-05	0.000646174	Up	ERVB4_2-LTR_MM	ERVK	LTR	ERVB4_2-LTR_MM:ERVK:LTR	2cWT-2cKO:8cWT-2cWT:8cKO-2cKO	NA	0	0	18.3069	0	0	1.17156	267.456	10.5108	996.164	0	73.7243	2987.35	743.334	0	0	0	0	0	0	0.0690769	0	0	0	0	0	0	0	0	0	4.82649	10.193	36.731	74.4107	46.0526	194.215	0
[truncated: 1,006 more rows]
[truncated: 1 more columns]

## Sheet: FOURWAY_8cWT_vs_8cKO_DE_TE_uni
Figure 1–figure supplement 5–Source Data 2. Differential TE Expression (DTE) – Unimapping Reads. TE expression analysis DESeq2 (v146.0) using uniquely mapped reads across four comparisons.
[truncated: 3,236 more rows]
[truncated: 1 more columns]

[truncated: 2 more sheets: FOURWAY_8cWT_vs_2cWT_DE_TE_uni, FOURWAY_8cKO_vs_2cKO_DE_TE_uni]
