# Supplementary material for: SETDB1 enables development beyond cleavage stages by extinguishing the MERVL-driven two-cell totipotency transcriptional program in the mouse embryo
Source: eLife. 2026 Feb 16;15:RP109248. doi: 10.7554/eLife.109248 (PMC12908936; doi:10.7554/eLife.109248)
Supplement: Figure 1—source data 1. — Details of all single embryos analyzed in the study, including genotype, developmental stage, and sequencing sample ID. [file elife-109248-fig1-data1.xlsx]

## Sheet: Samples
Figure 1–Source Data 1. Samples
ID	Genotype	Stage	Collection Day post Coitum	Collection Time	Name
TZSC93	Setdb1_MATKO	2c	1.5	10:00 AM	2c KO
TZSC94	Setdb1_MATKO	2c	1.5	10:00 AM	2c KO
TZSC95	Setdb1_MATKO	2c	1.5	10:00 AM	2c KO
TZSC96	Setdb1_MATKO	2c	1.5	10:00 AM	2c KO
TZSC97	Setdb1_MATKO	2c	1.5	10:00 AM	2c KO
TZSC98	Setdb1_MATKO	2c	1.5	10:00 AM	2c KO
TZSC99	Setdb1_MATKO	2c	1.5	10:00 AM	2c KO
TZSC100	Setdb1_MATKO	2c	1.5	10:00 AM	2c KO
TZSC101	Setdb1_MATKO	2c	1.5	10:00 AM	2c KO
TZSC102	Setdb1_MATKO	2c	1.5	10:00 AM	2c KO
TZSC103	Setdb1_MATKO	2c	1.5	10:00 AM	2c KO
TZSC104	Setdb1_MATKO	2c	1.5	10:00 AM	2c KO
TZSC105	Setdb1_MATKO	2c	1.5	10:00 AM	2c KO
TZSC106	Setdb1_MATKO	2c	1.5	10:00 AM	2c KO
TZSC107	Setdb1_MATKO	2c	1.5	10:00 AM	2c KO
TZSC108	Setdb1_MATKO	2c	1.5	10:00 AM	2c KO
TZSC109	Setdb1_MATKO	8c	2.5	10:00 AM	8c KO
TZSC110	Setdb1_MATKO	8c	2.5	10:00 AM	8c KO
TZSC111	Setdb1_MATKO	8c	2.5	10:00 AM	8c KO
TZSC112	Setdb1_MATKO	8c	2.5	10:00 AM	8c KO
TZSC113	Setdb1_MATKO	8c	2.5	10:00 AM	8c KO
TZSC114	Setdb1_MATKO	8c	2.5	10:00 AM	8c KO
TZSC115	Setdb1_MATKO	8c	2.5	10:00 AM	8c KO
TZSC116	Setdb1_MATKO	8c	2.5	10:00 AM	8c KO
TZSC117	Setdb1_WT	2c	1.5	10:00 AM	2c WT
TZSC118	Setdb1_WT	2c	1.5	10:00 AM	2c WT
TZSC119	Setdb1_WT	2c	1.5	10:00 AM	2c WT
TZSC120	Setdb1_WT	2c	1.5	10:00 AM	2c WT
TZSC121	Setdb1_WT	2c	1.5	10:00 AM	2c WT
TZSC122	Setdb1_WT	2c	1.5	10:00 AM	2c WT
TZSC123	Setdb1_WT	2c	1.5	10:00 AM	2c WT
TZSC124	Setdb1_WT	2c	1.5	10:00 AM	2c WT
TZSC125	Setdb1_WT	8c	2.5	10:00 AM	8c WT
TZSC126	Setdb1_WT	8c	2.5	10:00 AM	8c WT
TZSC127	Setdb1_WT	8c	2.5	10:00 AM	8c WT
TZSC128	Setdb1_WT	8c	2.5	10:00 AM	8c WT
TZSC129	Setdb1_WT	8c	2.5	10:00 AM	8c WT
TZSC130	Setdb1_WT	8c	2.5	10:00 AM	8c WT
TZSC131	Setdb1_WT	8c	2.5	10:00 AM	8c WT
TZSC132	Setdb1_WT	8c	2.5	10:00 AM	8c WT
