# Supplementary material for: SETDB1 enables development beyond cleavage stages by extinguishing the MERVL-driven two-cell totipotency transcriptional program in the mouse embryo
Source: eLife. 2026 Feb 16;15:RP109248. doi: 10.7554/eLife.109248 (PMC12908936; doi:10.7554/eLife.109248)
Supplement: Figure 1—source data 2. — DGE analysis was conducted using the four pairwise comparisons shown in Figure 1C and D, with thresholds of |log₂FC|>1 and adjusted p<0.05. The ‘expression’ columns indicate whether each transcript is up- or downregulated in any given comparison. The ‘FOUR_WAY_UP_COMP’ and ‘FOUR_WAY_DOWN_COMP’ columns assign DEGs to compartments corresponding to the Venn diagrams in Figure 1E and F. Sample columns (TZSC118–TZSC116) contain log₂-transformed counts per million (CPM) values, generated using the cpm function in edgeR (v4.4.1). [file elife-109248-fig1-data2.xlsx]

## Sheet: FOURWAY_2cWT-2cKO_DEG
Figure 1–Source Data 2. Differential Gene Expression (DGE) Analysis. Differential gene expression (DGE) analysis was conducted using the four pairwise comparisons shown in Fig. 1C and 1D, with thresholds of |log₂FC| > 1 and adjusted P < 0.05. The ‘expression’ columns indicate whether each transcript is up- or downregulated in any given comparison. The ‘FOUR_WAY_UP_COMP’ and ‘FOUR_WAY_DOWN_COMP’ c…
ensembl_id	Symbol	Uniq_syms	entrez	logFC	logCPM	F	PValue	FDR	expression	FOUR_WAY_UP_COMP	FOUR_WAY_DOWN_COMP	Uniq_syms	TZSC118	TZSC119	TZSC120	TZSC121	TZSC122	TZSC123	TZSC125	TZSC126	TZSC127	TZSC128	TZSC129	TZSC130	TZSC131	TZSC132	TZSC94	TZSC95	TZSC96	TZSC97	TZSC98	TZSC99	TZSC100	TZSC101	TZSC102	TZSC103	TZSC104	TZSC105	TZSC106	TZSC107	TZSC108	TZSC109	TZSC110	TZSC111	TZSC112	TZSC113	TZSC114	TZSC115	TZSC116
													2c WT	2c WT	2c WT	2c WT	2c WT	2c WT	8c WT	8c WT	8c WT	8c WT	8c WT	8c WT	8c WT	8c WT	2c KO	2c KO	2c KO	2c KO	2c KO	2c KO	2c KO	2c KO	2c KO	2c KO	2c KO	2c KO	2c KO	2c KO	2c KO	8c KO	8c KO	8c KO	8c KO	8c KO	8c KO	8c KO	8c KO
ENSMUSG00000064370	CYTB	CYTB	17711	1.39637	12.5915	45.3947	5.99215e-09	1.65993e-05	up	2cWT-2cKO	8cWT-2cWT	CYTB	12.5192	13.346	13.3827	14.617	13.1623	13.9291	12.1249	11.6333	12.5438	11.8217	11.4426	11.7782	11.5274	11.91	12.5416	12.3155	11.6442	12.7814	11.9973	12.5091	12.1738	11.8761	11.7308	12.4808	11.3345	12.8993	12.6172	11.5589	12.2162	12.5383	13.4929	12.4048	11.518	12.176	12.3514	12.6077	12.6107
ENSMUSG00000003437	Paf1	Paf1	54624	1.44542	7.21971	17.0601	9.18017e-05	0.0126938	up	2cWT-2cKO	NA	Paf1	7.67629	7.36523	7.63954	7.71402	9.31131	7.74155	6.67017	7.00399	7.61699	4.16292	7.67232	7.45377	7.26078	7.4162	6.60821	6.97917	6.56463	6.4472	5.74323	6.39758	7.34117	6.97731	6.21045	5.96356	7.06854	5.09374	6.30866	6.7944	7.40351	7.56347	7.3962	7.42453	7.50875	6.95805	7.37146	7.0833	6.73793
ENSMUSG00000064363	ND4	ND4	17719	1.91266	10.8278	52.7912	1.05377e-09	5.83826e-06	up	2cWT-2cKO	8cWT-2cWT	ND4	10.7576	11.5431	11.9492	13.1674	11.6934	12.2879	10.8112	10.1318	11.0945	9.77106	9.65745	10.1226	9.82891	10.6122	10.4876	10.2404	9.19773	11.0705	9.95585	10.1721	10.2245	9.54525	9.90907	10.477	9.32768	10.4022	10.7906	9.51714	10.0034	10.7718	11.8941	10.4667	8.63881	10.3957	10.4341	10.8482	10.4147
ENSMUSG00000028233	Tgs1	Tgs1	116940	1.93576	6.00281	13.7152	0.000400068	0.0272491	up	2cWT-2cKO	NA	Tgs1	6.13973	6.22355	5.20499	7.39803	8.03605	7.69009	3.88402	5.67518	6.94498	5.42404	5.47409	6.2199	4.79491	5.744	5.13658	6.33954	4.75621	3.89979	4.14115	2.89542	6.00915	4.5254	4.86902	5.85348	5.04872	-0.0764337	5.66846	5.94967	5.06853	7.09193	6.35749	5.33374	6.95856	6.23297	6.03888	4.38949	5.26903
ENSMUSG00000021692	Dimt1	Dimt1	66254	3.09758	5.19905	17.0447	9.241e-05	0.0126938	up	2cWT-2cKO	NA	Dimt1	5.52913	6.02837	6.54073	8.1489	2.48257	6.73763	1.41393	4.69768	4.95739	-0.229281	6.6912	5.20894	5.98561	4.71655	4.79972	4.9831	4.24961	4.78998	2.20928	2.41572	-0.140895	-1.02569	3.00643	2.09004	4.09923	1.34596	4.81562	-0.939318	-1.14955	5.58132	5.18852	2.89437	5.21502	4.81764	5.26161	5.464	5.69257
ENSMUSG00000014980	Tsen15	Tsen15	66637	4.14365	3.28613	11.6424	0.00103404	0.0455726	up	2cWT-2cKO	NA	Tsen15	0.38323	1.76957	0.214167	6.70504	5.28287	6.63251	-1.05064	1.96861	4.44356	2.70921	-0.17578	3.69014	-0.242772	-1.81399	-1.46129	0.856665	-1.81399	3.47501	1.611	-0.3409	0.402713	1.10122	0.0834343	-1.81399	1.64081	-0.550463	0.112196	0.30183	3.40584	4.03242	3.26769	-1.81399	0.341761	-1.81399	-0.217439	-1.81399	-1.81399
ENSMUSG00000079324	4932414N04Rik	4932414N04Rik	75721	4.22796	-1.28719	14.0663	0.0004242	0.0284299	up	2cWT-2cKO	NA	4932414N04Rik	-1.81399	1.03372	-1.81399	-1.81399	-1.81399	-1.81399	-1.81399	-1.81399	-1.81399	-1.81399	-1.81399	-1.81399	-1.81399	1.46242	-1.81399	-1.81399	-1.81399	-1.81399	-1.81399	-1.81399	-1.81399	-1.81399	-1.81399	-1.81399	-1.81399	-1.81399	-1.81399	-1.81399	-1.81399	-1.81399	-1.81399	-1.81399	-1.81399	-1.81399	-1.81399	-1.81399	-1.81399
ENSMUSG00000068874	Selenbp1	Selenbp1	20341	4.90514	-1.30685	18.0922	7.18979e-05	0.0113601	up	2cWT-2cKO	NA	Selenbp1	0.0184512	-1.81399	-1.81399	-1.81399	-1.81399	1.37398	-1.81399	-1.81399	-1.81399	-1.81399	-1.81399	-0.496733	-1.81399	-0.19626	-1.81399	-1.81399	-1.81399	-1.81399	-1.81399	-1.81399	-1.81399	-1.81399	-1.81399	-1.81399	-1.81399	-1.81399	-1.81399	-1.81399	-1.81399	-0.487658	-1.81399	-1.81399	-1.81399	-1.81399	-1.81399	-1.81399	-1.81399
ENSMUSG00000085754	NA	ENSMUSG00000085754	NA	4.92142	-1.0897	12.6922	0.000710581	0.0378158	up	2cWT-2cKO	8cWT-2cWT	ENSMUSG00000085754	2.57687	-1.45587	-1.81399	-1.81399	-1.81399	-0.215469	-1.81399	-1.81399	-1.81399	-1.81399	-1.81399	-1.81399	-1.81399	-1.81399	-1.81399	-1.81399	-1.81399	-1.81399	-1.81399	-0.897071	-1.81399	-1.81399	-1.81399	-1.81399	-1.81399	-1.81399	-1.81399	-1.81399	-1.81399	-1.81399	-1.81399	-1.81399	-1.81399	-1.81399	-1.81399	-1.81399	-1.81399
ENSMUSG00000089806	NA	ENSMUSG00000089806	NA	5.05459	-1.09965	15.0757	0.000232952	0.0204862	up	2cWT-2cKO	NA	ENSMUSG00000089806	-1.81399	1.33805	1.62593	-1.81399	-1.81399	-1.81399	-1.81399	-1.81399	-1.81399	-1.81399	-1.81399	-1.35668	-1.81399	0.426034	-1.81399	-1.81399	-1.81399	-1.81399	-1.81399	-1.81399	-1.81399	-1.81399	-1.81399	-1.81399	-1.81399	-1.81399	-1.26137	-1.81399	-1.81399	-1.81399	-1.81399	-1.81399	-1.81399	-1.81399	-1.81399	-1.81399	-1.81399
ENSMUSG00000035187	Nkx6-1	Nkx6-1	18096	5.17821	-1.00078	14.2349	0.000336503	0.0250808	up	2cWT-2cKO	NA	Nkx6-1	-1.81399	2.70811	-1.81399	0.109239	-1.81399	-1.81399	-1.81399	-1.81399	-1.81399	-1.81399	-0.773871	-1.81399	-1.81399	-1.81399	-1.81399	-1.3727	-1.81399	-1.81399	-1.81399	-1.81399	-1.81399	-1.81399	-1.27372	-1.81399	-1.81399	-1.81399	-1.81399	-1.81399	-1.81399	-1.81399	-1.81399	-1.81399	-1.81399	-1.81399	-1.81399	-1.81399	-1.81399
ENSMUSG00000029675	Eln	Eln	13717	5.45199	-0.142062	11.388	0.00121385	0.0492084	up	2cWT-2cKO	8cWT-2cWT	Eln	-1.81399	-1.81399	4.35219	0.905285	-1.81399	-1.81399	-1.81399	-1.81399	-1.81399	-1.81399	-1.81399	-1.81399	-1.81399	-1.81399	-1.81399	-1.81399	0.217527	-1.81399	-1.81399	-1.81399	-1.81399	-1.81399	-1.81399	-1.47068	-1.81399	-1.81399	-1.81399	-1.81399	-1.81399	-1.81399	-1.81399	-0.987281	-1.81399	-1.81399	-1.81399	-1.81399	-1.81399
ENSMUSG00000091803	Cox16	Cox16	66272	5.51436	-0.410986	15.4746	0.000182855	0.0173754	up	2cWT-2cKO	NA	Cox16	-1.81399	2.70811	-1.81399	-1.81399	-1.81399	-1.81399	-1.81399	-0.879239	-1.81399	-1.81399	-1.81399	-1.81399	-1.81399	3.27782	-1.46129	-1.81399	-1.81399	-1.81399	-1.81399	-1.81399	-1.81399	-1.81399	-1.81399	-1.81399	-1.81399	-1.81399	-1.81399	-1.81399	-1.81399	-1.81399	-1.81399	-0.702657	-1.81399	-1.81399	-1.81399	-1.81399	-1.81399
ENSMUSG00000078787	Cyp2t4	Cyp2t4	384724	5.61726	1.5098	11.3316	0.00119555	0.0488238	up	2cWT-2cKO	8cWT-2cWT	Cyp2t4	-1.81399	-1.81399	-1.81399	6.5908	-1.81399	-1.81399	-1.81399	-1.81399	-1.01165	-1.81399	0.571603	-1.81399	-1.81399	-1.81399	-1.81399	-1.81399	-1.81399	-1.81399	-1.81399	-1.81399	-1.81399	-1.81399	-1.81399	2.26076	-1.81399	-1.81399	-1.81399	-1.81399	-1.81399	-1.81399	-1.81399	-1.81399	-1.81399	-1.81399	-1.44755	-1.81399	-1.81399
ENSMUSG00000024867	Pip5k1b	Pip5k1b	18719	5.62971	1.02946	11.6834	0.00105948	0.0458583	up	2cWT-2cKO	8cWT-2cWT	Pip5k1b	4.05329	4.59954	3.72724	0.905285	-1.81399	-1.81399	-1.81399	-1.81399	-1.81399	-1.81399	-1.81399	-1.81399	-1.81399	-1.81399	-1.81399	-1.81399	0.958643	-1.81399	-1.40834	-1.81399	-1.81399	-1.81399	-1.81399	-1.47068	-0.779127	-1.81399	-1.81399	-0.643817	-1.81399	-1.81399	-1.81399	-0.0824149	-1.81399	-1.81399	-1.81399	-1.81399	2.89938
ENSMUSG00000023911	Flywch2	Flywch2	76917	5.81344	-0.505152	13.5294	0.000459884	0.0299754	up	2cWT-2cKO	NA	Flywch2	-1.81399	1.76957	-1.81399	3.86602	-1.81399	-1.81399	-1.81399	-1.81399	0.03551	-1.81399	-1.81399	-1.81399	-1.81399	-1.81399	-1.81399	-1.81399	-1.81399	-1.81399	-1.81399	-1.81399	-1.81399	-1.81399	-0.57353	-1.81399	-1.81399	-1.81399	-1.81399	-1.31136	-1.81399	-1.81399	-1.81399	-1.81399	-1.81399	-1.81399	-1.81399	-1.81399	-1.81399
ENSMUSG00000025936	Gm4956	Gm4956	241041	5.83316	-0.00343963	11.4956	0.00115513	0.0482397	up	2cWT-2cKO	NA	Gm4956	-1.81399	-1.81399	-1.81399	4.81164	-1.81399	-1.81399	-1.81399	-1.81399	1.32536	-1.81399	-1.81399	-0.496733	-1.81399	-1.81399	-1.81399	-1.81399	-1.81399	-0.792753	-1.81399	-1.81399	-1.81399	-1.81399	-1.81399	-1.81399	-1.81399	-0.0764337	-1.81399	-1.81399	-1.81399	-1.81399	-1.81399	-1.81399	-1.81399	-1.81399	-1.81399	-1.81399	-1.81399
ENSMUSG00000027993	Trim2	Trim2	80890	5.91597	0.59867	12.8581	0.000590236	0.0344221	up	2cWT-2cKO	NA	Trim2	-1.81399	-1.81399	5.3233	-1.81399	-1.81399	-1.81399	-1.81399	0.537079	-1.81399	-1.81399	-1.81399	-1.35668	1.33758	-0.944065	-1.81399	-1.81399	-1.81399	-1.81399	-0.422539	-1.81399	-1.81399	-1.02569	-1.81399	-0.0408644	-1.81399	-1.81399	-1.81399	-1.81399	-1.81399	-1.81399	-1.81399	-1.81399	-1.81399	-1.81399	-1.44755	-1.81399	-1.81399
ENSMUSG00000108753	NA	ENSMUSG00000108753	NA	5.95133	0.125632	13.0076	0.000551308	0.033812	up	2cWT-2cKO	NA	ENSMUSG00000108753	3.00111	3.90964	-1.81399	-1.81399	-1.81399	-1.81399	-1.81399	-1.81399	-1.81399	-1.81399	-1.81399	-1.81399	2.25403	-1.81399	-1.81399	-1.81399	-1.81399	-1.81399	-1.81399	-1.81399	-1.81399	-1.81399	-0.881557	-1.81399	-1.81399	-0.550463	-1.81399	-1.81399	-1.81399	0.439729	-1.49325	-1.81399	-1.81399	-1.81399	-1.15558	-1.81399	-1.81399
ENSMUSG00000090114	NA	ENSMUSG00000090114	NA	6.02717	0.974795	15.1306	0.000212764	0.0191154	up	2cWT-2cKO	NA	ENSMUSG00000090114	-1.81399	-1.81399	3.74619	-1.81399	-1.81399	-1.81399	-1.81399	-0.879239	-1.81399	-1.81399	-0.773871	-1.81399	5.50532	1.68994	-1.81399	-1.3727	-1.81399	-1.21483	-1.81399	-1.81399	-1.81399	-1.81399	-1.81399	-1.81399	-1.81399	-1.81399	-1.81399	-1.81399	-1.81399	-1.81399	-0.647373	-1.34221	-1.81399	-1.81399	-1.81399	-1.81399	-1.81399
ENSMUSG00000074575	Kcng1	Kcng1	241794	6.03761	2.00571	12.9186	0.000574154	0.034212	up	2cWT-2cKO	8cWT-2cWT	Kcng1	-1.81399	1.29158	-1.81399	-1.81399	6.98681	-1.81399	-1.81399	0.660524	-1.81399	-1.81399	-0.773871	-1.81399	-1.81399	-1.81399	-1.81399	-1.81399	-1.81399	-1.81399	-1.81399	-1.81399	-1.81399	-1.02569	2.05661	-0.287612	-1.81399	-1.81399	-1.81399	-1.81399	-1.81399	-1.81399	-1.81399	-1.81399	-1.81399	3.31317	-1.81399	-1.81399	-1.81399
ENSMUSG00000028979	Masp2	Masp2	17175	6.12327	0.292338	14.0567	0.000390702	0.0268341	up	2cWT-2cKO	8cWT-2cWT	Masp2	-1.81399	3.10737	4.49348	-1.81399	-1.81399	1.52621	-1.81399	-1.81399	-1.81399	-1.81399	-1.81399	-1.81399	-1.81399	-1.81399	-1.1781	-1.3727	-1.81399	-1.81399	-1.81399	-0.897071	-1.81399	-1.81399	-1.81399	-1.81399	-1.81399	-1.26118	-0.862777	-1.81399	-1.81399	-1.81399	-1.81399	-1.81399	-1.81399	-1.81399	-1.81399	-1.81399	-1.81399
ENSMUSG00000111356	Rpl32l	Rpl32l	621697	6.14901	1.3625	14.2119	0.000320077	0.0240236	up	2cWT-2cKO	NA	Rpl32l	-1.81399	-1.45587	-1.81399	5.92238	-1.81399	-1.81399	-0.185311	3.97359	1.65108	-1.81399	-1.81399	0.907316	-1.81399	0.426034	-0.401644	-1.81399	-1.81399	-1.21483	-1.81399	-1.81399	-1.81399	-1.02569	-1.81399	-1.81399	0.409807	-1.81399	-1.81399	-1.81399	-1.81399	-1.81399	-1.49325	-0.465039	1.7986	-0.129601	-1.44755	-1.81399	0.566096
ENSMUSG00000026586	Prrx1	Prrx1	18933	6.1599	1.05788	12.1172	0.000918261	0.042777	up	2cWT-2cKO	8cWT-2cWT	Prrx1	-1.81399	-1.81399	-1.81399	6.16526	-1.81399	-1.81399	-1.81399	-1.81399	-1.81399	-1.81399	-1.81399	-1.81399	-1.81399	-1.81399	-1.81399	-1.81399	-0.200979	-1.81399	-1.81399	-1.81399	-1.81399	-1.81399	0.875521	-1.47068	-1.81399	-1.81399	-1.81399	-1.81399	-1.81399	-1.81399	-1.81399	-1.81399	-1.81399	-1.81399	-1.81399	-1.81399	-1.81399
ENSMUSG00000059562	Ccdc154	Ccdc154	207209	6.33997	0.164338	14.4996	0.000281488	0.023201	up	2cWT-2cKO	NA	Ccdc154	-1.81399	-1.81399	3.47796	3.69961	-1.81399	-1.81399	-1.81399	-1.81399	3.07555	-1.81399	-1.81399	-1.81399	-1.81399	-1.81399	-0.738253	-1.81399	-1.81399	-1.81399	-1.81399	-1.81399	-1.81399	-1.81399	-1.81399	-1.81399	-1.81399	-1.81399	-1.81399	-1.31136	-1.81399	-1.81399	-1.81399	-1.81399	-1.81399	-0.505962	-1.81399	-1.81399	-1.81399
ENSMUSG00000048617	Rtbdn	Rtbdn	234542	6.34412	1.04367	13.9402	0.000361537	0.0260135	up	2cWT-2cKO	NA	Rtbdn	-1.81399	-1.81399	-1.81399	5.65313	-1.81399	3.76046	-1.81399	-1.81399	-1.81399	-1.81399	-1.81399	2.56229	-1.81399	-1.81399	-1.81399	-1.81399	-1.38837	-1.81399	-1.81399	-1.81399	-1.81399	0.398643	-1.81399	-0.428858	-1.81399	-1.26118	-1.81399	-1.81399	-1.81399	-1.00349	-1.81399	-1.81399	-1.81399	-1.81399	-1.81399	-1.81399	-1.81399
ENSMUSG00000116031	D030024E09Rik	D030024E09Rik	432956	6.46412	-0.239397	16.9561	0.000104059	0.0134075	up	2cWT-2cKO	8cWT-2cWT	D030024E09Rik	-1.81399	4.2261	-0.655954	-1.81399	-1.81399	-1.81399	-1.81399	-1.81399	-1.81399	-1.81399	-1.81399	-1.81399	-1.81399	-1.81399	-1.81399	-1.81399	-1.81399	-1.81399	-1.81399	-1.81399	-1.81399	-1.81399	-1.81399	-1.81399	-1.20569	-1.81399	-1.26137	-1.81399	-1.81399	-1.81399	-1.81399	-1.81399	-1.81399	-1.81399	-1.81399	-0.13463	-1.81399
ENSMUSG00000055078	Gabra5	Gabra5	110886	6.72954	-0.705163	23.0226	1.25283e-05	0.00351459	up	2cWT-2cKO	8cWT-2cWT	Gabra5	0.91612	3.28391	-1.81399	-1.81399	-1.81399	-1.81399	-1.81399	-1.81399	-1.81399	-1.81399	-1.81399	-1.81399	-1.81399	-1.81399	-1.81399	-1.81399	-1.81399	-1.81399	-1.81399	-1.81399	-1.81399	-1.81399	-1.81399	-1.81399	-1.81399	-1.81399	-1.81399	-1.81399	-1.81399	-1.81399	-1.81399	-0.987281	-1.81399	-1.81399	-1.81399	-1.81399	-1.81399
ENSMUSG00000024851	Pitpnm1	Pitpnm1	18739	6.73737	1.00663	16.9378	9.67597e-05	0.0131695	up	2cWT-2cKO	NA	Pitpnm1	-1.81399	3.63044	-1.81399	4.08438	-1.81399	-1.81399	-1.81399	-1.81399	2.77468	-1.81399	4.58613	-1.81399	2.55865	-1.81399	-1.81399	-1.81399	-1.81399	-0.792753	-1.81399	-1.81399	-1.81399	-1.81399	-1.27372	-1.81399	-1.81399	-1.81399	-1.81399	-1.81399	-1.81399	-1.81399	-1.81399	-0.702657	-1.81399	-1.81399	-1.81399	-1.81399	-1.81399
ENSMUSG00000104018	NA	ENSMUSG00000104018	NA	6.89733	-0.149974	19.297	3.55826e-05	0.00672066	up	2cWT-2cKO	NA	ENSMUSG00000104018	-1.81399	4.3159	-1.81399	-1.81399	-1.81399	-1.81399	-1.81399	-1.81399	-1.81399	-1.81399	0.83723	-1.81399	-1.81399	-1.81399	-1.81399	-1.81399	-1.81399	-1.81399	-1.81399	-1.81399	-1.81399	-1.81399	-1.81399	-1.81399	-1.81399	-1.81399	-1.81399	-1.81399	-1.14955	-1.81399	-1.81399	-0.702657	-1.81399	-1.81399	-1.81399	-1.81399	-1.81399
ENSMUSG00000097268	NA	ENSMUSG00000097268	NA	7.02827	0.881177	17.7641	6.79207e-05	0.01123	up	2cWT-2cKO	NA	ENSMUSG00000097268	3.26436	-1.81399	4.84071	-1.81399	-1.81399	-1.81399	-1.81399	3.49858	2.88209	-1.81399	-1.81399	-1.81399	-1.81399	-1.81399	-1.81399	-0.761965	-1.81399	-1.21483	-1.81399	-1.81399	-1.81399	-1.81399	-1.81399	-1.81399	-1.81399	-1.81399	-1.81399	-1.81399	-1.81399	-1.81399	-1.81399	-1.34221	-1.81399	-1.81399	-0.705176	-1.81399	-1.81399
ENSMUSG00000078915	NA	ENSMUSG00000078915	NA	7.21914	-0.203517	21.1336	1.87047e-05	0.00450567	up	2cWT-2cKO	8cWT-2cWT	ENSMUSG00000078915	-1.81399	-0.242423	-1.81399	-1.81399	4.70316	-1.81399	-1.81399	-1.81399	-1.81399	-1.81399	-1.81399	-1.81399	-1.81399	-1.81399	-1.81399	-1.81399	-1.81399	-1.81399	-1.81399	-1.81399	-1.81399	-1.02569	-1.81399	-1.81399	-1.81399	-1.81399	-1.81399	-1.81399	-1.81399	-1.81399	-1.81399	-1.81399	-1.81399	-1.81399	-1.44755	-1.81399	-1.81399
ENSMUSG00000083483	Gm14044	Gm14044	668899	7.21988	0.51051	19.9271	2.73774e-05	0.00591499	up	2cWT-2cKO	NA	Gm14044	-1.81399	-1.45587	-1.81399	-1.81399	-1.81399	4.8208	-1.05064	-0.879239	-1.81399	-1.81399	3.7553	-1.00997	-1.81399	-1.31443	-1.81399	-1.81399	-1.81399	-1.81399	-1.81399	-1.81399	-1.81399	-1.81399	-1.81399	-1.47068	-1.81399	-1.81399	-1.81399	-1.31136	-1.81399	-1.81399	-1.81399	-1.34221	-1.81399	-0.505962	-1.15558	-1.81399	-1.81399
ENSMUSG00000070806	Zmynd12	Zmynd12	332934	7.34926	-0.430756	23.0583	1.55855e-05	0.00404759	up	2cWT-2cKO	8cWT-2cWT	Zmynd12	2.17297	-1.81399	0.214167	-1.81399	-1.81399	3.6321	-1.81399	-1.81399	-1.81399	-1.81399	-1.81399	-1.81399	-1.81399	-1.81399	-1.81399	-1.81399	-1.81399	-1.81399	-1.81399	-1.81399	-1.81399	-1.81399	-1.81399	-1.81399	-1.81399	-1.81399	-1.81399	-1.81399	-1.81399	-1.81399	-1.81399	-1.81399	-1.81399	-1.81399	-1.81399	-1.81399	-1.81399
ENSMUSG00000040714	Klc3	Klc3	232943	7.56184	1.82964	21.8281	1.25672e-05	0.00351459	up	2cWT-2cKO	NA	Klc3	-1.81399	-1.81399	-1.81399	5.94115	-1.81399	4.39585	-0.185311	-1.81399	2.88209	-1.81399	-1.81399	4.39749	-0.824285	3.59126	-1.81399	-1.81399	-1.81399	-1.81399	-1.81399	-1.81399	-1.81399	-1.02569	-0.57353	-1.81399	-1.81399	-1.81399	-1.26137	-1.31136	-1.81399	-1.00349	-1.81399	-1.81399	-0.915587	-0.129601	-1.81399	-1.81399	-1.81399
ENSMUSG00000096997	NA	ENSMUSG00000096997	NA	7.70939	1.06045	20.1948	3.09822e-05	0.00627993	up	2cWT-2cKO	8cWT-2cWT	ENSMUSG00000096997	-1.81399	-0.242423	4.31459	5.67572	-1.81399	-1.81399	-1.81399	-1.81399	-1.81399	-1.81399	-1.81399	-1.81399	-1.81399	-1.81399	-1.81399	-1.81399	-0.792902	-1.81399	-1.81399	-0.897071	-1.81399	-1.81399	-1.81399	-1.81399	-1.81399	-1.81399	-1.81399	-1.81399	-1.81399	-1.81399	-1.81399	-1.81399	-1.81399	-1.81399	-1.81399	-1.81399	-1.81399
ENSMUSG00000034035	Ccdc17	Ccdc17	622665	7.86191	1.54928	23.2249	7.17175e-06	0.00267783	up	2cWT-2cKO	8cWT-2cWT	Ccdc17	-1.81399	3.02455	1.70556	-1.81399	-1.81399	6.37615	0.560241	-1.81399	-1.81399	-1.81399	-1.81399	0.180169	-1.81399	-1.81399	-1.81399	-1.81399	-0.792902	-1.81399	-1.40834	-1.81399	-1.81399	-1.81399	-1.81399	-0.76113	-1.81399	-1.81399	-1.81399	-1.81399	-1.81399	0.836027	-0.816967	-1.34221	-1.81399	-1.81399	-1.81399	-1.81399	-1.81399
ENSMUSG00000022824	Muc13	Muc13	17063	7.95376	0.0332431	23.4058	1.08894e-05	0.00329077	up	2cWT-2cKO	NA	Muc13	1.67729	-1.81399	-1.81399	-1.81399	-1.81399	4.56361	-1.81399	-1.2722	-1.81399	-1.81399	-1.81399	-1.81399	-1.81399	0.762629	-1.81399	-1.81399	-1.81399	-1.81399	-1.81399	-1.81399	-1.81399	-1.81399	-1.81399	-1.81399	-1.81399	-1.81399	-1.81399	-1.81399	-1.81399	-1.81399	-1.81399	-1.81399	-1.81399	-1.81399	-1.81399	-1.81399	-1.81399
ENSMUSG00000101166	NA	ENSMUSG00000101166	NA	8.60649	2.26562	27.0278	1.93047e-06	0.00133693	up	2cWT-2cKO	8cWT-2cWT	ENSMUSG00000101166	-1.81399	-1.81399	-1.81399	7.45138	-1.81399	-1.81399	-1.81399	-1.2722	-1.81399	-1.81399	-1.81399	-1.81399	-1.81399	-1.81399	-1.81399	-1.81399	-1.81399	-1.81399	-1.81399	-1.81399	-1.81399	-1.81399	-1.81399	0.0682993	-1.81399	-1.81399	-1.81399	-1.81399	-1.81399	-1.81399	-1.81399	-1.81399	-1.81399	-1.81399	-1.81399	-1.81399	-1.81399
ENSMUSG00000088918	NA	ENSMUSG00000088918	NA	8.62111	1.62773	26.0663	2.35463e-06	0.00137929	up	2cWT-2cKO	NA	ENSMUSG00000088918	3.83501	-1.1692	-1.81399	6.13296	-1.81399	-1.81399	-1.81399	-0.879239	-1.81399	-1.81399	-1.81399	-1.81399	4.60853	-1.81399	-1.81399	-1.81399	-1.81399	-1.81399	-1.81399	-1.81399	-1.81399	-1.81399	-1.81399	-0.961208	-1.81399	-1.81399	-1.81399	-1.81399	-1.81399	-1.81399	-1.23101	-1.81399	-1.81399	-1.81399	-1.81399	-1.81399	-1.81399
ENSMUSG00000005983	1700037C18Rik	1700037C18Rik	73261	9.11991	1.1532	26.7506	2.60824e-06	0.00144505	up	2cWT-2cKO	NA	1700037C18Rik	-1.81399	-1.81399	-1.81399	5.90336	-1.81399	-1.81399	-1.81399	3.26565	-1.81399	3.13984	-1.81399	-1.35668	-1.81399	-1.81399	-1.81399	-1.81399	-1.81399	-1.81399	-1.81399	-1.81399	-1.81399	-1.81399	-1.81399	-1.81399	-1.81399	-1.81399	-1.81399	-1.81399	-1.81399	-1.81399	-1.23101	-1.34221	-1.81399	-1.81399	-1.81399	-1.81399	-1.81399
ENSMUSG00000044664	Prss42	Prss42	235628	9.16365	0.835264	26.7555	3.29878e-06	0.00176868	up	2cWT-2cKO	8cWT-2cWT	Prss42	-0.796383	-1.81399	-0.0219397	5.92238	-1.81399	-1.81399	-1.81399	-1.81399	-1.81399	-1.81399	-1.81399	-1.81399	0.491429	-1.81399	-1.81399	-1.81399	-1.81399	-1.81399	-1.81399	-1.81399	-1.81399	-1.81399	-1.81399	-1.81399	-1.81399	-1.81399	-1.81399	-1.81399	-1.81399	-1.81399	-1.81399	-1.81399	-1.81399	-1.81399	-1.81399	-1.81399	-1.81399
ENSMUSG00000064367	ND5	ND5	17721	1.00828	11.1093	15.9619	0.000175005	0.0172044	up	2cWT-2cKO:8cKO-2cKO	8cWT-2cWT	ND5	11.1672	11.3026	11.6274	12.4164	11.9131	11.7173	10.6715	10.503	11.4598	10.7576	10.2999	11.1505	10.8954	10.9516	11.4969	10.6405	9.77106	11.8383	10.4027	10.2021	10.6664	10.3315	9.85414	11.0163	10.0251	10.2489	11.6384	10.1273	10.7076	11.3019	12.4773	11.4562	9.5012	10.812	10.9586	11.2021	11.2308
ENSMUSG00000064341	ND1	ND1	17716	1.04847	12.3029	19.9788	4.27404e-05	0.00772162	up	2cWT-2cKO:8cKO-2cKO	8cWT-2cWT	ND1	11.9639	12.2094	12.4204	14.1642	12.9983	12.6752	12.021	12.03	12.5403	11.6398	11.2903	11.3911	11.7366	12.2625	11.5101	11.6867	11.6861	12.7698	11.6651	11.5283	11.9101	11.6686	11.6023	11.8828	11.4701	12.1016	12.2097	12.1333	11.9732	12.443	13.8414	12.1662	11.3626	12.7323	11.9314	12.7995	12.5952
ENSMUSG00000018379	Srsf1	Srsf1	110809	1.06063	8.76702	13.4897	0.000442945	0.0290996	up	2cWT-2cKO:8cKO-2cKO	NA	Srsf1	9.15616	8.6935	8.39832	9.34073	8.96263	9.10489	9.06564	9.57994	9.263	9.21561	9.45927	9.20137	8.74656	9.34326	7.46531	7.68827	6.87763	8.10157	7.94254	7.24549	8.57316	7.23466	7.66888	7.49914	8.81806	4.54791	8.60692	7.85962	8.76649	9.41915	9.38691	9.58155	8.97593	9.27587	9.1468	8.96826	8.15461
ENSMUSG00000022797	Tfrc	Tfrc	22042	1.07562	9.18405	15.5418	0.000177538	0.0172044	up	2cWT-2cKO:8cKO-2cKO	NA	Tfrc	8.55916	9.10598	9.44923	10.1955	8.49884	9.75752	10.0883	10.0668	10.0759	9.43296	9.8402	9.72584	9.91144	9.80159	8.38308	8.63542	7.4332	8.02984	7.16682	6.77785	8.76911	7.56906	8.16727	7.42859	9.41002	7.36593	8.89776	9.01267	8.76373	9.60776	9.79671	8.65083	9.35133	9.0391	9.39819	8.77341	9.64903
ENSMUSG00000001767	Crnkl1	Crnkl1	66877	1.09299	9.38364	18.6252	4.71631e-05	0.00833934	up	2cWT-2cKO:8cKO-2cKO	NA	Crnkl1	8.9136	8.93253	9.27666	9.36004	9.18553	9.1583	9.2966	9.72555	9.76236	9.85496	9.3671	9.63367	9.5262	9.84654	8.21045	7.15222	7.35193	8.47488	7.68535	7.71253	9.26919	7.32859	7.42064	7.5559	8.37574	6.45176	8.76054	8.41648	8.14686	10.6158	10.1342	11.0642	10.303	10.3623	10.8434	9.77397	9.67036
ENSMUSG00000068039	Tcp1	Tcp1	21454	1.14591	8.65785	18.3459	5.30633e-05	0.00918714	up	2cWT-2cKO:8cKO-2cKO	NA	Tcp1	8.9123	8.76619	9.12111	8.95852	7.89621	9.26834	9.07999	9.36224	9.59405	9.56013	8.99389	9.1849	9.00377	9.3617	8.10957	7.68756	7.23342	7.86293	7.33962	6.66148	7.77621	7.68086	6.62347	6.66025	7.7774	7.20255	8.56809	8.04392	8.75875	9.52201	9.1797	8.50118	8.30956	9.26901	8.64318	8.57202	9.07609
ENSMUSG00000029422	Rsrc2	Rsrc2	208606	1.19178	7.897	13.6699	0.000408313	0.027476	up	2cWT-2cKO:8cKO-2cKO	8cWT-2cWT	Rsrc2	8.30844	8.03251	8.96251	9.19194	7.84006	8.69312	7.52012	7.58788	7.5313	8.14708	8.0233	7.71277	6.17105	7.10082	8.24981	7.30021	7.43645	7.76631	7.11683	6.7363	7.99735	4.63751	6.54979	7.03109	7.70809	7.18685	7.67182	6.9981	7.87869	8.81057	8.27874	7.8775	7.82867	8.19415	6.49332	8.56009	8.91741
ENSMUSG00000017999	Ddx27	Ddx27	228889	1.20638	8.04647	15.9098	0.000151117	0.0161007	up	2cWT-2cKO:8cKO-2cKO	NA	Ddx27	8.3758	8.52045	8.09622	8.03119	8.67768	8.92482	7.72877	7.82901	7.72192	7.84919	8.75496	8.17928	8.09906	8.07372	6.38166	7.26819	6.37748	6.77303	6.48508	6.31608	8.63094	7.24845	7.00059	6.83842	7.56542	5.22247	7.66429	8.00517	7.86948	8.78416	8.77414	8.21425	8.35466	8.98814	8.69305	8.86154	8.25405
ENSMUSG00000063200	Nol7	Nol7	70078	1.2403	7.86372	11.965	0.000890096	0.0423905	up	2cWT-2cKO:8cKO-2cKO	NA	Nol7	7.3846	8.05398	7.46321	8.6743	7.55624	8.53046	8.0855	8.30343	8.48576	8.103	7.82348	8.08493	8.38089	8.21926	6.83316	6.75149	6.86682	7.30625	6.37543	5.46152	7.7276	5.54869	6.76386	6.25669	6.57437	1.18675	8.00793	6.27303	7.40493	9.13823	8.30869	8.89541	8.03061	8.17017	8.20756	7.79484	9.2277
ENSMUSG00000002524	Puf60	Puf60	67959	1.2497	7.48067	12.4541	0.000710262	0.0378158	up	2cWT-2cKO:8cKO-2cKO	NA	Puf60	7.75039	7.9076	6.68767	6.64905	8.06492	8.23557	7.90863	7.88388	7.56393	8.46524	7.8406	8.22193	8.13834	8.14563	6.30612	5.40648	5.95106	6.26144	4.99808	3.54228	7.06305	6.49223	6.64412	6.61935	7.76855	4.27854	6.79261	6.76168	6.79979	7.6645	8.26486	8.35953	7.80667	7.47625	8.33465	8.1502	6.9895
ENSMUSG00000026615	Eprs	Eprs	107508	1.26436	8.2286	19.0597	3.92953e-05	0.00733852	up	2cWT-2cKO:8cKO-2cKO	NA	Eprs	8.07895	8.70019	7.95267	8.18084	8.06492	7.78181	9.32231	8.53179	8.89454	8.37174	8.76495	8.36758	8.71707	8.86366	6.81107	6.6774	6.69673	7.06413	6.26196	6.11346	7.78709	5.67668	6.70434	6.1032	6.75656	5.45862	7.88855	7.83136	6.96066	9.10772	8.94699	8.30035	9.26868	9.20683	8.12836	8.77134	9.72847
ENSMUSG00000035311	Gnptab	Gnptab	432486	1.32992	7.18913	11.4118	0.00115151	0.0482097	up	2cWT-2cKO:8cKO-2cKO	NA	Gnptab	6.87377	7.10717	4.92629	3.51147	8.44966	6.09496	7.93927	7.98478	7.59899	8.40116	7.75691	7.71714	7.52732	8.34832	4.67627	4.65045	5.83006	6.01589	5.78973	4.35686	3.88856	5.5423	5.99943	5.85539	5.37855	4.80938	6.6281	6.39387	4.81932	8.43144	7.5238	8.27444	6.56442	7.93676	8.80339	7.94544	7.05585
ENSMUSG00000002658	Gtf2f1	Gtf2f1	98053	1.35957	8.39165	21.2373	1.59771e-05	0.00407639	up	2cWT-2cKO:8cKO-2cKO	NA	Gtf2f1	7.59491	8.01071	6.96346	8.93997	9.15325	8.62414	9.44931	9.19555	8.80865	9.3674	9.19512	8.17452	9.10787	9.42481	7.79345	5.7223	7.51399	6.55896	5.59125	6.10113	6.7685	6.43477	7.11526	6.59332	7.96908	7.17762	7.01323	7.22423	7.68702	9.03647	9.57518	9.31273	8.08384	8.38195	8.9902	8.96826	8.53092
ENSMUSG00000027598	Itch	Itch	16396	1.36128	6.89622	11.5414	0.00108387	0.0467922	up	2cWT-2cKO:8cKO-2cKO	NA	Itch	7.81529	6.7374	5.79309	3.86602	8.32906	6.57693	7.89427	7.51818	7.57758	8.34424	8.53189	7.59977	7.57477	7.36357	6.48803	5.81127	6.00905	5.43735	6.48508	6.46924	5.28106	5.53589	5.75905	5.80698	5.30969	4.73219	6.25701	4.08731	3.55623	6.71884	7.37912	6.93932	7.19466	7.0772	6.90722	6.39635	5.72556
ENSMUSG00000064345	ND2	ND2	17717	1.36497	11.8144	37.4239	5.94402e-08	9.87956e-05	up	2cWT-2cKO:8cKO-2cKO	8cWT-2cWT	ND2	11.7269	12.0346	12.1612	13.7815	12.5247	12.5021	11.704	11.5554	12.293	11.351	11.0488	11.0254	11.1981	12.0398	11.2918	11.1418	10.9212	12.1762	10.9099	11.0204	11.3567	10.5271	10.7794	11.3894	10.9492	11.3548	11.8999	11.1186	11.1745	12.0276	13.1726	11.8144	10.9037	12.0096	11.5156	12.0356	11.8039
ENSMUSG00000020430	Pes1	Pes1	64934	1.39561	7.22653	16.7874	0.000103241	0.013406	up	2cWT-2cKO:8cKO-2cKO	NA	Pes1	7.85668	7.80795	6.72874	8.06153	7.62431	7.15463	7.15485	6.88403	7.89732	8.27706	8.00147	7.56463	7.90177	6.97826	6.91736	6.77715	5.11017	5.62453	6.30809	5.95019	4.45063	6.26673	5.94298	5.5395	6.9395	5.15417	6.46208	6.67061	6.67146	7.18839	8.07222	7.87615	7.65839	7.68047	6.96059	8.41934	6.86179
ENSMUSG00000029439	Sfswap	Sfswap	231769	1.39866	6.65084	11.8329	0.000946366	0.0430947	up	2cWT-2cKO:8cKO-2cKO	NA	Sfswap	7.23914	6.88653	5.8985	6.87086	7.09472	3.90635	7.08279	7.77283	7.53707	7.55849	7.42993	6.85154	7.06323	7.58398	5.16219	5.58224	4.86167	5.06702	4.78268	4.51927	6.45708	4.31671	5.04305	5.54187	4.18455	4.58031	6.19301	4.57734	5.5194	8.02306	7.31513	7.64671	7.23758	6.59119	7.65012	5.464	6.60243
ENSMUSG00000022557	Bop1	Bop1	12181	1.3987	7.06398	12.4537	0.00071041	0.0378158	up	2cWT-2cKO:8cKO-2cKO	NA	Bop1	6.80963	7.36452	7.46177	8.0002	7.24642	8.01524	6.8271	6.77214	7.39196	8.3162	6.94093	7.57108	6.63708	7.25882	4.13208	5.526	4.06846	6.57456	5.48817	3.31706	6.44339	5.96631	6.1382	5.82265	7.54942	4.5642	5.56708	6.79594	7.55286	7.76603	7.14006	7.81896	6.76026	7.86713	7.31372	7.10316	8.07365
ENSMUSG00000025133	Ints4	Ints4	101861	1.42197	6.75558	11.8823	0.000924902	0.042777	up	2cWT-2cKO:8cKO-2cKO	NA	Ints4	6.68034	7.42565	7.01906	6.89993	6.42482	7.16045	8.19404	7.24495	7.6986	4.11637	7.96551	7.00716	7.40139	7.40523	4.19548	4.29421	5.8251	4.3256	5.59125	5.3851	6.0594	6.02704	6.27926	4.09543	5.61205	5.35477	6.53823	5.40884	5.60572	6.94403	8.22137	6.47855	7.31532	7.83035	6.86713	4.83172	6.78563
ENSMUSG00000021116	Eif2s1	Eif2s1	13665	1.44501	7.02843	14.0578	0.00034295	0.0253341	up	2cWT-2cKO:8cKO-2cKO	NA	Eif2s1	6.68444	6.9682	8.09899	7.16239	7.83048	8.01524	7.27057	7.64786	7.0385	6.9962	7.77285	6.83689	6.26345	7.6007	6.72775	5.93881	4.68684	5.19939	6.27234	5.71377	7.61604	4.64945	5.07104	5.83042	6.29083	3.93458	6.94959	5.06501	6.90567	7.97715	8.21932	7.67261	6.47957	7.48642	7.71084	6.41766	6.91995
ENSMUSG00000033099	Nol12	Nol12	97961	1.4782	7.21902	16.412	0.000121444	0.0147337	up	2cWT-2cKO:8cKO-2cKO	NA	Nol12	6.02499	5.97791	7.23905	5.95968	7.38368	7.85733	7.74886	7.6158	8.62099	8.42999	7.82539	7.8728	8.12537	7.52252	5.80052	6.41029	4.61971	5.00916	4.79232	4.06192	5.34137	3.82152	5.98479	3.57269	6.54702	4.67334	5.7093	5.44855	6.32142	8.55829	8.5332	8.18565	7.60111	7.61092	7.05373	8.10495	7.60918
ENSMUSG00000034889	Cactin	Cactin	70312	1.47911	6.59406	12.8185	0.00060102	0.0345308	up	2cWT-2cKO:8cKO-2cKO	NA	Cactin	7.38711	7.04287	6.28938	5.37801	5.36474	7.84833	5.95815	7.55743	6.4985	7.2382	6.5223	5.57594	7.13405	7.29279	4.17045	5.24165	5.48814	3.79716	5.20726	4.06192	4.95406	5.70555	5.86518	4.92185	5.34188	5.29258	5.04755	5.80116	6.84015	7.44066	7.30741	6.93932	8.08906	7.32394	7.04567	7.50755	7.02968
ENSMUSG00000037458	Azin1	Azin1	54375	1.48185	8.68294	31.1701	3.46536e-07	0.000479982	up	2cWT-2cKO:8cKO-2cKO	NA	Azin1	8.16276	8.54604	8.82889	8.93296	9.43176	7.49629	9.51766	9.23797	9.17068	9.62702	8.77982	9.89739	9.4901	9.45391	6.23398	7.21483	7.0785	7.09845	6.81942	6.85647	7.10062	7.45127	7.22273	7.56757	7.9544	7.25491	6.77697	7.54767	7.16178	10.042	9.64523	9.46579	9.00451	9.26163	8.98389	7.27056	9.33847
ENSMUSG00000063785	Utp14a	Utp14a	72554	1.49188	6.92498	14.9021	0.000235394	0.02056	up	2cWT-2cKO:8cKO-2cKO	NA	Utp14a	6.35274	6.57956	7.59057	7.20185	7.96782	5.67379	6.84961	5.76733	6.07595	7.58864	7.79839	7.42645	7.3675	7.53081	4.828	5.34279	6.57943	6.15282	5.09481	5.46976	6.22464	6.34954	4.54901	5.4287	3.95406	5.17022	6.01196	5.40884	5.08983	8.36075	8.15876	8.23337	7.19224	6.58174	7.16952	8.59324	6.43303
ENSMUSG00000029415	Sdad1	Sdad1	231452	1.50916	6.80643	11.2434	0.00124603	0.0499043	up	2cWT-2cKO:8cKO-2cKO	NA	Sdad1	6.82269	5.73257	5.27191	7.61813	0.0596176	7.96116	6.0816	6.25991	7.12741	7.13691	6.4298	6.43327	7.22337	6.17838	5.39335	6.15613	4.85682	5.00258	3.40961	5.12461	2.87578	5.49016	3.54263	5.74462	6.57663	4.75366	5.30174	5.27391	5.1984	7.69765	8.1222	7.57361	8.26647	7.80485	7.28129	8.09176	8.84795
ENSMUSG00000041203	Trir	Trir	68544	1.54084	7.43603	14.2145	0.000319703	0.0240236	up	2cWT-2cKO:8cKO-2cKO	NA	Trir	8.06803	8.04131	7.8136	3.6086	8.24867	7.71208	7.62096	8.4319	8.46431	8.51093	7.77087	7.85902	7.88818	8.16941	6.59181	6.70159	4.71927	6.33655	3.97319	5.11062	6.37289	6.90944	4.56484	4.71076	7.99798	5.48024	5.80831	4.06705	6.93146	8.40978	7.99744	7.97975	7.19708	7.53621	8.66497	5.93204	7.08156
ENSMUSG00000035047	Kri1	Kri1	215194	1.62326	6.54511	11.6205	0.00104465	0.0455726	up	2cWT-2cKO:8cKO-2cKO	NA	Kri1	6.54057	6.88359	6.51056	-1.81399	7.66797	5.47295	6.63317	6.26478	6.30939	7.30716	5.27579	7.14977	5.7875	7.12535	4.76671	4.79496	4.257	5.3364	6.08684	3.66226	4.58144	5.06931	2.10073	3.39548	5.61645	5.05967	5.3774	4.82066	4.89387	8.16344	7.3581	8.19651	7.82085	6.46319	7.22291	8.09507	7.53668
ENSMUSG00000001305	Rrp15	Rrp15	67223	1.63811	6.96795	14.5542	0.000274721	0.0231015	up	2cWT-2cKO:8cKO-2cKO	NA	Rrp15	6.49469	7.0835	6.2764	5.5096	7.24642	7.43749	6.02998	7.80914	7.61854	7.60137	7.64442	6.26438	7.99826	7.96241	5.16536	6.29909	4.51891	4.09783	5.37716	4.1049	6.20449	2.78683	3.58984	5.26348	5.85448	0.689205	6.20604	4.34464	5.52983	8.25437	8.09892	7.68809	8.34815	8.2814	6.81328	6.07296	8.44935
ENSMUSG00000035754	Wdr18	Wdr18	216156	1.66371	6.60735	12.0343	0.000862024	0.0416503	up	2cWT-2cKO:8cKO-2cKO	NA	Wdr18	5.62595	5.99975	5.41498	7.84936	0.0596176	7.45893	6.82205	7.64693	7.40462	6.74405	7.3338	7.75731	7.61039	7.45155	2.61189	4.35286	4.19685	5.28856	4.03138	3.58339	5.59159	4.71906	6.3007	3.88024	2.10824	4.84315	5.57514	3.87061	6.15962	8.03136	7.46719	7.68886	7.00346	7.0772	6.89431	6.78853	6.91995
ENSMUSG00000039640	Mrpl12	Mrpl12	56282	1.76164	6.38025	15.3539	0.00019282	0.0178048	up	2cWT-2cKO:8cKO-2cKO	NA	Mrpl12	6.17797	5.8252	7.4372	4.72764	6.73301	7.08277	5.90661	7.24001	7.87409	5.71701	6.12902	6.9868	6.69288	6.79011	4.26805	3.3728	4.14208	4.34652	3.39702	2.11289	4.87464	3.7787	5.14138	4.65934	4.44381	5.45426	6.22664	4.95904	6.05521	7.70212	6.79937	7.3506	6.50321	7.10166	7.37504	7.17372	7.29439
ENSMUSG00000042590	Ipo11	Ipo11	76582	1.80606	6.50522	12.2347	0.000785764	0.0398176	up	2cWT-2cKO:8cKO-2cKO	NA	Ipo11	5.47817	5.43946	6.69012	8.89495	7.60759	5.93412	7.13666	7.06811	6.03929	6.71311	6.90883	7.44765	6.02962	6.23808	4.96892	4.6621	3.49983	5.95249	5.56053	2.62708	7.0013	5.11306	3.05209	4.29392	2.71128	1.84975	6.58885	6.14839	6.78898	7.5602	6.8831	7.07027	6.67263	6.67656	7.55111	5.31302	4.52422
ENSMUSG00000023170	Gps2	Gps2	56310	1.84038	6.21511	11.2652	0.00123331	0.049746	up	2cWT-2cKO:8cKO-2cKO	NA	Gps2	6.62605	6.06337	6.57558	7.02837	5.73686	7.137	5.99002	6.6638	7.06039	3.85806	7.32301	6.97954	7.52951	6.7338	4.26214	3.50799	5.26466	2.03256	5.93833	3.77302	6.49409	5.41525	-0.881557	5.06043	4.93373	3.21952	1.00726	4.59867	4.95705	7.54868	6.74421	7.39748	7.07882	5.82644	6.25003	2.71136	6.94818
ENSMUSG00000019897	Ccdc59	Ccdc59	52713	1.85905	6.31282	13.4992	0.000441047	0.0290898	up	2cWT-2cKO:8cKO-2cKO	8cWT-2cWT	Ccdc59	5.3957	6.66292	6.59139	7.7988	8.5464	7.48936	3.45883	5.7361	5.69202	2.09255	5.18339	5.75663	4.92042	6.16424	5.19978	6.43595	5.37734	5.07956	6.34461	5.16918	6.45025	3.82152	5.76592	5.80304	4.62914	-1.26118	5.39116	5.76703	5.71942	6.39053	7.0427	6.896	7.74851	6.43197	5.84196	6.24965	7.15605
ENSMUSG00000028811	Yars	Yars	107271	1.8883	6.35086	11.2443	0.0012455	0.0499043	up	2cWT-2cKO:8cKO-2cKO	NA	Yars	5.15146	4.41135	4.26289	7.48375	2.27236	5.63245	6.12324	7.09298	7.40372	8.41565	7.60934	6.79064	6.99511	7.15066	5.65024	3.15935	3.60771	1.22297	3.47097	-0.897071	4.99218	5.07816	2.05661	2.69453	2.9247	-0.862492	2.58314	4.62663	3.40584	7.97592	6.3209	6.43886	7.06034	6.77662	6.96819	6.7638	8.29308
ENSMUSG00000024640	Psat1	Psat1	107272	1.89006	7.48782	17.5037	9.75831e-05	0.0131695	up	2cWT-2cKO:8cKO-2cKO	NA	Psat1	6.24878	6.47427	4.81401	8.64884	7.32353	8.33556	7.9416	8.37727	8.5273	7.29154	8.17197	9.38264	8.62479	9.07548	3.85421	5.62749	4.81742	3.10941	4.25018	2.89542	6.53985	4.90976	6.10609	5.53475	7.2688	1.90195	6.80293	4.7269	6.07314	8.57136	7.81351	7.99102	8.03872	7.49484	8.08314	7.03588	7.08156
ENSMUSG00000019362	D8Ertd738e	D8Ertd738e	101966	1.92784	6.66742	18.1383	5.79365e-05	0.00972689	up	2cWT-2cKO:8cKO-2cKO	NA	D8Ertd738e	6.22087	5.89291	6.41016	8.8234	5.41685	6.28837	7.19055	7.41677	8.10503	6.20244	6.7568	7.51362	7.03883	8.04893	4.84787	3.42841	4.96446	2.47391	5.8041	4.48171	6.63931	4.69623	4.69286	3.20541	5.63389	4.72497	5.89776	3.23447	5.96971	7.56837	7.06956	7.368	7.53575	6.29213	6.47343	7.62667	5.72556
ENSMUSG00000039756	Dnttip2	Dnttip2	99480	1.96537	8.21558	17.9185	0.000123863	0.0147624	up	2cWT-2cKO:8cKO-2cKO	NA	Dnttip2	8.11882	8.18964	8.74893	8.8234	4.78475	9.26157	8.45521	8.79355	8.88907	8.32901	8.09955	8.56193	8.15121	8.43231	6.25049	3.27002	3.21147	7.39175	5.89422	6.22484	7.66554	3.38077	4.6265	5.73844	6.09382	5.00702	7.23538	7.21159	8.00365	9.79279	9.17688	9.51044	9.49679	9.24276	8.96597	8.66625	8.00814
ENSMUSG00000025651	Uqcrc1	Uqcrc1	22273	2.0209	6.11778	13.0874	0.000531649	0.0334359	up	2cWT-2cKO:8cKO-2cKO	NA	Uqcrc1	4.68005	6.47427	5.23884	4.44157	5.94638	5.5725	7.66675	7.23381	7.90243	7.32262	5.23033	7.35721	7.03575	6.40964	5.04661	1.60027	4.23473	0.922208	2.85	2.50401	0.959432	5.11306	4.11581	-1.19357	3.53859	2.64625	3.95885	4.07722	1.78462	5.3732	6.89945	7.79272	7.54906	6.29213	7.04746	2.40501	7.24973
ENSMUSG00000058392	Rrp1b	Rrp1b	72462	2.162	6.28889	18.8899	4.21953e-05	0.0077069	up	2cWT-2cKO:8cKO-2cKO	NA	Rrp1b	5.10336	6.89141	6.20628	6.92844	7.17256	6.31997	7.13055	7.17291	7.11095	7.39752	5.66559	6.84224	5.64119	7.54905	4.78331	5.36076	5.08965	4.29364	2.93955	4.51927	2.50586	5.49016	4.61133	1.60173	2.60918	2.30228	3.89592	4.57734	5.39374	8.01829	7.21417	5.70929	7.12272	7.30874	6.10415	7.43628	1.95335
ENSMUSG00000071172	Srsf3	Srsf3	20383	2.22454	6.50862	14.7594	0.00028802	0.023201	up	2cWT-2cKO:8cKO-2cKO	NA	Srsf3	2.80453	5.63126	6.37101	8.16496	0.0596176	4.74524	7.28164	7.40909	6.86475	8.31877	7.6829	6.85419	7.04191	7.32491	1.74685	1.21392	5.6342	3.95531	4.72843	5.11062	0.156363	4.31671	0.973692	3.467	4.24254	1.26855	1.73878	3.19767	5.49832	7.39177	7.83469	7.46282	7.47925	6.73458	7.34324	7.31097	6.87655
ENSMUSG00000031765	Mt1	Mt1	17748	2.24428	7.27462	16.6669	0.00018685	0.0175589	up	2cWT-2cKO:8cKO-2cKO	NA	Mt1	5.82074	7.55115	7.15113	8.68548	6.31926	7.87693	7.90147	7.07089	8.61672	9.08423	5.43455	7.93478	7.11958	9.28403	4.46613	2.25156	6.65821	6.44235	5.00224	4.12593	5.03847	4.74154	5.37937	5.54659	0.944963	4.21806	6.93714	3.8351	4.32779	8.49111	8.9232	7.97092	7.22815	7.75245	7.25667	5.37967	3.46589
ENSMUSG00000038975	Rabggtb	Rabggtb	19352	2.34031	5.72496	11.9526	0.000895265	0.0425148	up	2cWT-2cKO:8cKO-2cKO	NA	Rabggtb	4.18624	5.66127	6.33391	2.33626	5.13515	3.96081	7.27242	7.29225	7.41718	6.38039	6.11032	6.67409	6.04808	7.31001	2.07815	-0.761965	2.09953	-0.466615	-1.40834	-0.062008	3.23499	-0.518807	4.00409	-0.961208	-0.779127	4.17628	2.61475	2.90981	5.13151	5.7344	6.20798	6.73547	6.511	5.95891	6.44783	2.96392	7.66976
ENSMUSG00000067219	Nipal1	Nipal1	70701	2.35722	6.30486	22.2501	1.05977e-05	0.00329077	up	2cWT-2cKO:8cKO-2cKO	NA	Nipal1	5.32928	5.23057	6.71197	7.12183	6.37301	5.69804	5.7559	6.66749	6.50859	6.73638	6.44481	7.39679	6.00464	6.18539	3.6062	4.32383	1.84902	1.54594	1.42507	4.58654	4.67816	2.60266	2.83419	1.74015	4.79335	2.97342	5.33533	5.29149	1.55885	6.94403	6.90628	8.53879	6.58672	7.98775	8.30569	7.42054	5.47704
ENSMUSG00000002010	Idh3g	Idh3g	15929	2.36796	5.51507	11.8682	0.000930981	0.042777	up	2cWT-2cKO:8cKO-2cKO	NA	Idh3g	4.99548	4.42218	1.25454	6.2729	7.55042	4.806	6.56831	6.35892	6.24042	7.28103	6.30926	6.8409	6.10207	6.56296	3.21158	3.59561	1.16109	4.07294	4.49433	-1.1431	2.95513	4.93923	-0.57353	2.80906	3.25281	-0.294066	3.44678	4.5263	4.13636	4.03242	7.20035	6.67307	5.58361	3.98336	5.7893	-1.81399	4.52422
ENSMUSG00000002319	Ipo4	Ipo4	75751	2.42032	6.37226	23.3849	6.72909e-06	0.00266296	up	2cWT-2cKO:8cKO-2cKO	NA	Ipo4	4.57814	7.2013	3.30981	6.75893	7.49695	7.3278	4.65974	7.49764	7.04544	5.63684	6.77274	6.61911	7.86927	7.44961	4.78743	3.63159	4.10165	5.15265	3.55271	4.1049	6.15072	3.38077	3.65046	4.35445	2.46072	1.00776	5.14819	2.14836	3.81685	7.68719	7.52158	7.44562	6.75699	7.49987	7.38288	5.21909	6.24106
ENSMUSG00000003269	Cyth2	Cyth2	19158	2.42428	7.13184	30.3037	4.81397e-07	0.000615484	up	2cWT-2cKO:8cKO-2cKO	NA	Cyth2	6.11568	6.17797	4.70199	8.64312	6.60409	5.84282	7.80752	7.78221	7.57278	7.009	8.77587	7.16372	7.6	8.3478	2.63036	-0.160071	4.06846	4.70344	5.30148	2.46054	5.55385	1.75958	2.88553	4.50768	4.50195	5.08247	4.84257	4.54839	5.77307	8.31778	8.33708	8.0473	7.82398	7.69223	8.20997	7.53705	8.79066
ENSMUSG00000060499	Rpl10l	Rpl10l	238217	2.49588	5.79995	13.1141	0.000553131	0.033812	up	2cWT-2cKO:8cKO-2cKO	NA	Rpl10l	2.02589	4.49062	7.18278	6.47963	7.60198	6.7454	-0.185311	2.48518	4.79095	3.74023	6.00627	5.46944	1.16794	6.50432	5.27801	4.67365	1.54568	4.30437	2.56492	3.29248	5.19377	1.46763	4.00409	3.02758	6.04577	-1.81399	0.802893	1.84939	3.85052	6.28343	7.23534	7.63638	6.68302	5.83707	7.69547	7.43628	4.91586
ENSMUSG00000022889	Mrpl39	Mrpl39	27393	2.54051	5.43371	12.3296	0.000752147	0.038844	up	2cWT-2cKO:8cKO-2cKO	NA	Mrpl39	2.74307	4.16296	3.25793	6.60264	0.847977	6.06419	5.6459	6.90915	6.05315	5.82226	7.6829	6.79064	7.11083	7.30035	0.895077	-0.33421	0.72308	-0.200781	-1.09207	3.42278	-1.81399	1.92582	3.49383	3.63613	-0.450327	4.1223	2.18022	-0.939318	4.43154	7.21361	6.16734	4.92731	4.66382	5.53795	5.62111	4.62748	3.11389
ENSMUSG00000008373	Prpf31	Prpf31	68988	2.58622	6.51947	24.2178	4.83986e-06	0.00223454	up	2cWT-2cKO:8cKO-2cKO	NA	Prpf31	6.35531	6.78536	4.01978	7.0801	5.71621	7.05488	5.79765	7.77112	8.25495	7.7033	7.02654	7.7566	7.28691	6.60019	4.46613	1.39229	2.3685	4.31503	2.05753	4.32691	2.70264	0.792283	5.37039	-1.19357	3.89742	3.58144	3.49853	0.555603	5.90709	6.92888	7.64205	6.86229	7.3374	7.60782	7.40054	6.38558	7.69496
ENSMUSG00000071654	Uqcc3	Uqcc3	107197	2.65289	5.29871	11.4663	0.00112256	0.047575	up	2cWT-2cKO:8cKO-2cKO	NA	Uqcc3	5.20942	4.54611	5.26536	5.40531	7.16497	4.11285	5.76645	2.10527	5.91074	1.8861	0.571603	3.59203	6.13121	4.07703	4.32585	4.47011	-1.38837	0.0236083	-1.81399	-1.81399	0.959432	3.54311	2.18512	2.88564	3.15956	-0.550463	3.89592	0.555603	4.77618	5.85686	6.83111	6.83196	7.86866	6.17967	5.77421	7.2764	2.89938
ENSMUSG00000073838	Tufm	Tufm	233870	2.67595	5.66642	12.517	0.000764607	0.0393453	up	2cWT-2cKO:8cKO-2cKO	NA	Tufm	5.14554	3.29573	3.64884	5.88409	3.34136	5.70603	5.7559	7.17161	7.4314	6.50304	3.26275	5.69001	6.55772	5.79382	-1.46129	1.08143	-0.372641	3.45589	-1.81399	-1.81399	3.80535	4.8281	-0.319839	-1.19357	2.20476	-0.862492	2.00045	2.6071	-1.14955	7.64763	6.76971	6.90132	7.37633	5.96377	6.20087	7.48755	5.43777
ENSMUSG00000021639	Gtf2h2	Gtf2h2	23894	2.68141	5.03734	11.6254	0.00104226	0.0455726	up	2cWT-2cKO:8cKO-2cKO	NA	Gtf2h2	1.21668	4.14347	2.22112	7.10529	-1.81399	2.96044	6.73876	5.81462	6.10063	6.35054	3.39224	6.05936	5.93362	5.78768	-0.401644	3.38691	0.441403	-0.200781	3.23668	3.13548	-1.81399	0.792283	-0.881557	3.5634	-0.182729	0.909192	3.35618	2.93239	1.18951	6.38684	5.50652	6.06268	2.56951	4.54675	6.33184	7.16745	4.36585
ENSMUSG00000078713	Tomm5	Tomm5	68512	2.72491	5.94645	14.8933	0.000289174	0.023201	up	2cWT-2cKO:8cKO-2cKO	NA	Tomm5	4.12732	4.97524	5.67443	6.83115	5.28287	5.76078	6.41913	6.8093	6.84098	7.43118	6.23064	6.86342	5.7875	6.97422	-0.401644	0.489333	0.884315	4.56751	-1.40834	-0.686947	1.10572	-1.81399	0.249416	-0.0408644	3.91179	3.51596	4.15435	5.36387	-1.14955	7.00791	6.86919	8.0455	7.25857	6.94827	6.52973	6.53926	4.73329
ENSMUSG00000001707	Eef1e1	Eef1e1	66143	2.78151	5.31759	14.3041	0.000307147	0.0238556	up	2cWT-2cKO:8cKO-2cKO	NA	Eef1e1	4.24285	3.83059	5.78395	7.62395	4.61668	4.806	6.21855	6.03881	6.15518	0.993039	6.73662	6.72272	5.42287	5.34515	-0.401644	3.48195	-0.200979	4.00878	2.32014	0.171606	-0.51573	0.152501	2.98305	4.48817	-0.182729	-0.862492	4.23792	2.54984	5.02497	6.40885	6.12552	6.12994	6.99236	4.91118	5.50049	6.21357	0.566096
ENSMUSG00000027131	Emc4	Emc4	68032	2.87295	5.01387	12.3285	0.000752528	0.038844	up	2cWT-2cKO:8cKO-2cKO	NA	Emc4	3.83501	5.38794	-0.0219397	6.42734	1.72925	6.74928	5.94892	6.03881	6.85818	5.93382	3.51106	4.81673	6.57903	6.13555	1.90692	-1.81399	4.53114	2.54802	3.08794	-1.81399	3.59847	3.46422	0.398257	0.974802	-1.20569	-1.26118	3.94648	2.02773	0.691803	5.05746	5.46549	6.0745	6.65163	5.83177	5.02703	2.22339	0.566096
ENSMUSG00000019989	Enpp3	Enpp3	209558	2.94364	5.51206	16.3916	0.000122527	0.0147574	up	2cWT-2cKO:8cKO-2cKO	NA	Enpp3	4.1393	5.06086	5.27191	3.86602	-1.81399	5.19483	5.13727	2.2301	3.83273	6.09852	-1.81399	5.40227	4.60853	4.98129	1.31605	-0.532292	3.51222	-1.21483	-1.40834	0.0595224	-0.140895	3.09682	1.23354	-1.19357	2.64402	-0.0764337	-0.862777	2.14836	3.15951	8.17526	7.75796	7.95694	6.63389	7.91183	6.77696	5.16972	5.17663
ENSMUSG00000079225	NA	ENSMUSG00000079225	NA	3.26379	4.60161	17.6844	7.02679e-05	0.01123	up	2cWT-2cKO:8cKO-2cKO	NA	ENSMUSG00000079225	0.91612	3.22331	3.2841	3.04036	6.63741	5.94091	5.23928	4.46346	4.02311	5.90673	3.26275	4.41911	2.07362	5.22773	1.06764	2.12265	-0.567522	0.217749	0.817103	1.25651	1.76433	0.792283	1.3107	3.014	2.20476	-0.862492	3.80293	0.771344	1.97979	6.78485	5.78185	4.70803	5.63445	6.16708	5.05228	6.57762	2.6473
ENSMUSG00000024570	Rbfa	Rbfa	68731	3.28086	4.67848	12.7729	0.000613675	0.0348723	up	2cWT-2cKO:8cKO-2cKO	NA	Rbfa	4.98888	1.24356	3.43189	4.72764	7.36391	2.59766	2.77189	3.59459	5.62247	3.74023	5.36263	6.46999	6.06025	4.17427	4.06577	-1.3727	-0.567522	-1.21483	-0.254201	-1.1431	0.402713	-1.02569	-0.57353	-1.81399	1.5701	3.4118	4.32649	3.10132	-0.0742253	5.13873	6.1871	5.8258	6.19988	3.31317	6.55013	1.11364	-1.81399
ENSMUSG00000024493	Lars	Lars	107045	3.32585	5.13667	15.9513	0.000148403	0.015919	up	2cWT-2cKO:8cKO-2cKO	NA	Lars	2.42859	3.83869	3.47796	5.40531	-1.81399	-1.81399	5.72917	5.37522	6.47124	5.70133	3.12048	6.86342	7.02337	6.4779	3.02873	1.14919	-0.567522	-1.21483	-1.40834	-1.43989	-1.81399	1.35553	1.5837	-1.81399	-1.81399	-1.81399	0.802893	-0.939318	-1.14955	7.42815	6.99144	5.63139	6.04742	4.26114	3.78366	5.90212	6.90563
ENSMUSG00000028766	Alpl	Alpl	11647	3.47505	5.35461	24.2858	4.71203e-06	0.00223454	up	2cWT-2cKO:8cKO-2cKO	NA	Alpl	4.93493	4.07653	3.95609	0.109239	7.42243	5.40583	6.06887	6.16667	6.03465	7.71506	6.88335	4.80583	4.98571	7.64123	-0.00971152	3.23926	1.88758	2.51144	1.56672	-1.1431	2.916	1.66867	-1.27372	-0.428858	3.03382	0.689205	1.73878	1.98516	3.79972	6.49367	5.81307	5.6088	5.63445	5.7776	4.39858	5.85605	-1.81399
ENSMUSG00000057554	Lgals8	Lgals8	56048	3.47566	4.59094	13.9067	0.000367015	0.0262938	up	2cWT-2cKO:8cKO-2cKO	NA	Lgals8	0.212339	2.25453	3.90641	5.94115	-1.81399	4.41548	1.51752	5.84421	7.07518	0.507634	5.46431	6.68306	5.55779	5.91413	2.2068	-0.761965	-1.38837	-1.21483	2.20928	-1.81399	0.402713	3.51729	-0.104157	-0.961208	-1.81399	-1.26118	-1.26137	-0.939318	-1.81399	6.27945	5.9097	5.85626	3.22901	4.11151	4.91744	4.62748	5.02589
ENSMUSG00000020238	Ncln	Ncln	103425	3.51817	4.5769	13.3329	0.000475547	0.0305176	up	2cWT-2cKO:8cKO-2cKO	NA	Ncln	3.52391	4.61378	6.05869	1.79137	0.0596176	3.15985	5.46984	6.15359	6.51695	3.39509	4.74003	6.13752	6.6811	5.57977	-1.81399	-1.3727	2.44806	-1.21483	3.93014	-1.43989	-1.81399	1.57165	-0.881557	-1.81399	-1.81399	0.112631	-1.26137	-0.643817	-1.81399	2.74762	6.26753	5.40664	6.12058	2.02236	4.21272	-1.81399	5.7578
ENSMUSG00000071041	Impdh2-ps	Impdh2-ps	100042069	3.58687	4.34373	18.2595	5.50372e-05	0.00943065	up	2cWT-2cKO:8cKO-2cKO	NA	Impdh2-ps	4.82057	1.8992	1.70556	2.33626	6.49922	0.524193	4.3018	4.58531	5.47586	4.208	5.96523	5.46944	6.1138	5.08996	0.47209	-0.761965	-0.372641	2.47391	-1.09207	-1.1431	1.6734	1.46763	-0.104157	0.353552	1.24648	-1.81399	1.79505	1.89608	1.97979	5.48101	5.48158	5.45809	4.33543	5.79951	5.169	3.27529	4.09
ENSMUSG00000061559	Wdr61	Wdr61	66317	3.63966	4.38565	11.8022	0.000967494	0.0434614	up	2cWT-2cKO:8cKO-2cKO	NA	Wdr61	0.67414	3.36469	5.63938	-1.81399	-1.81399	5.42533	4.18079	5.42395	5.81368	2.09255	6.83481	6.90232	5.04816	5.33257	-1.81399	-1.03526	-1.38837	-1.81399	-1.81399	-1.81399	-1.81399	-1.81399	-1.27372	-0.158969	-1.81399	1.41942	-1.81399	-1.81399	4.14994	5.7402	5.17727	3.90939	5.29846	4.67082	3.29636	1.77269	4.97192
ENSMUSG00000050299	NA	ENSMUSG00000050299	NA	3.6479	3.1789	12.3518	0.000744477	0.038844	up	2cWT-2cKO:8cKO-2cKO	NA	ENSMUSG00000050299	4.30796	3.03869	0.214167	5.78367	-1.81399	0.201254	5.12912	3.48194	4.76312	3.13984	2.84691	3.50034	2.81003	3.54837	-1.1781	0.935543	0.217527	-0.792753	-0.254201	-0.062008	2.50586	0.152501	0.398257	0.858026	0.702058	-0.862492	-0.862777	0.555603	-0.352013	0.836027	5.12554	3.63061	2.30835	2.52146	2.61436	4.98228	3.74863
ENSMUSG00000006471	Ndor1	Ndor1_ENSMUSG00000006471	78797	3.66748	4.06112	11.4286	0.00114254	0.0479735	up	2cWT-2cKO:8cKO-2cKO	NA	Ndor1_ENSMUSG00000006471	-1.81399	-1.81399	4.28897	1.79137	6.51126	2.79042	3.10688	4.95446	3.96566	3.54319	3.68963	4.26844	5.53179	4.54535	-1.81399	-1.03526	2.66338	-0.792753	-1.81399	-1.81399	-1.81399	-1.02569	-0.881557	3.84232	0.56332	-1.26118	-0.862777	-1.31136	-1.14955	5.78014	5.45621	4.74402	6.06341	2.16423	6.41762	4.15594	-1.81399
ENSMUSG00000031433	Rbm41	Rbm41	237073	3.77717	4.18024	12.9929	0.000555036	0.033812	up	2cWT-2cKO:8cKO-2cKO	NA	Rbm41	4.07839	0.853519	4.51574	5.5096	0.847977	-1.81399	3.74154	3.96164	4.60278	-1.81399	3.06976	6.58125	0.975669	0.148183	-1.46129	-1.03526	2.83105	-0.466615	-1.81399	-1.81399	-0.140895	-1.81399	2.63856	-1.81399	-1.81399	-1.26118	-0.862777	-0.939318	0.158614	3.76304	6.3412	6.87181	4.56244	5.47125	6.47476	2.71136	4.66691
ENSMUSG00000025591	Tma16	Tma16	66282	3.79152	6.34915	20.5996	5.58001e-05	0.00946382	up	2cWT-2cKO:8cKO-2cKO	NA	Tma16	4.37027	5.63126	5.45008	6.96558	6.42482	6.59856	7.56161	7.61675	7.62628	6.67347	7.5365	7.27462	6.92028	7.11314	1.8763	4.30167	-0.792902	-1.81399	-0.832828	-1.1431	-1.0235	5.12166	-0.104157	-0.76113	-1.81399	-0.294066	3.44678	-1.81399	2.57064	6.75079	7.6814	7.91678	7.14543	5.92443	6.87119	7.88554	6.90563
ENSMUSG00000026317	Cln8	Cln8	26889	3.8377	4.75056	18.5256	4.91842e-05	0.00860517	up	2cWT-2cKO:8cKO-2cKO	NA	Cln8	-1.81399	4.59476	3.40828	0.905285	-1.81399	5.30418	6.33656	5.05913	5.84853	6.03738	5.54079	8.02273	6.66923	5.81809	-1.81399	-1.3727	1.99745	-1.81399	-0.613147	1.20476	-0.140895	1.46763	0.249416	-0.287612	-1.81399	-1.26118	1.18623	-1.31136	-1.81399	5.27277	5.29383	4.82464	5.15659	4.48047	5.0487	-1.81399	0.566096
ENSMUSG00000024181	Mrpl28	Mrpl28	68611	3.88449	4.53085	17.3845	7.98718e-05	0.0117482	up	2cWT-2cKO:8cKO-2cKO	NA	Mrpl28	4.36007	2.01813	4.74973	7.78328	0.0596176	6.0391	4.85035	3.44807	5.15023	2.70921	5.75659	5.25776	6.24757	5.88282	-0.401644	1.39229	4.14208	1.47172	-1.81399	1.44675	1.76433	-1.02569	0.398257	0.169781	0.042914	-0.550463	-0.550807	0.434289	4.58942	3.99411	5.29903	4.13392	-1.81399	-1.01655	5.68246	4.20578	2.34166
ENSMUSG00000118353	NA	ENSMUSG00000118353	NA	3.89706	3.26255	11.8666	0.000931668	0.042777	up	2cWT-2cKO:8cKO-2cKO	NA	ENSMUSG00000118353	2.77413	0.221383	0.594821	5.4321	1.35488	2.20504	4.87981	3.37784	2.88209	5.28366	0.245778	4.45444	1.16794	5.69895	-1.46129	-0.160071	-1.81399	0.922208	-0.103468	0.70616	1.10572	-1.81399	-1.81399	-0.287612	-1.81399	-1.81399	1.4189	-0.643817	-1.81399	4.97135	4.52885	4.81903	4.26343	0.168613	3.73102	1.11364	-1.81399
ENSMUSG00000037754	Ppp1r16b	Ppp1r16b	228852	3.94586	4.42488	14.9722	0.000228198	0.0201749	up	2cWT-2cKO:8cKO-2cKO	NA	Ppp1r16b	2.67887	7.07752	5.03046	-1.81399	-1.81399	7.22028	3.80433	3.4651	3.87495	2.57796	-0.773871	-0.730648	4.76547	-0.944065	2.49581	3.67821	-1.81399	2.65251	-1.81399	-0.686947	2.39639	-0.518807	-1.81399	2.95835	2.89607	-0.862492	-1.81399	1.34291	2.48748	3.97457	5.89432	4.61395	4.83505	4.95088	5.6187	-1.81399	7.05585
ENSMUSG00000060019	NA	ENSMUSG00000060019	NA	3.98054	3.6279	12.6553	0.000647611	0.0360074	up	2cWT-2cKO:8cKO-2cKO	NA	ENSMUSG00000060019	3.00111	-0.386104	-1.81399	0.109239	7.30981	0.7879	2.89241	3.93743	4.81826	1.3556	3.78705	4.36815	4.09642	4.86958	0.387751	-0.532292	0.333803	-1.81399	-1.81399	-0.686947	1.36014	-0.518807	1.15201	0.353552	-1.20569	-1.81399	-0.294451	4.1073	-0.696359	2.60239	3.82402	2.15861	6.04742	4.59767	2.13634	1.77269	0.566096
ENSMUSG00000079173	Zan	Zan	22635	4.0994	4.42507	17.6844	7.02675e-05	0.01123	up	2cWT-2cKO:8cKO-2cKO	NA	Zan	0.0184512	4.20745	5.65451	-1.81399	0.847977	-1.81399	4.3018	5.4753	4.23245	5.17432	6.16571	5.61705	2.75117	5.81206	-1.1781	-1.3727	-1.38837	-1.81399	-1.81399	-1.43989	-1.0235	-1.02569	-0.57353	-0.76113	-0.779127	-1.26118	3.04424	-0.939318	-1.81399	6.90068	6.70656	5.47246	4.82258	4.76292	5.50049	5.14439	-1.81399
ENSMUSG00000068391	Chrac1	Chrac1	93696	4.11797	3.98341	14.811	0.00024509	0.0211069	up	2cWT-2cKO:8cKO-2cKO	NA	Chrac1	3.52391	5.58865	-0.304395	4.1504	6.09772	3.56336	-0.554045	3.07909	4.59016	3.54319	-1.81399	2.9664	6.68504	4.93764	-1.81399	-0.00470468	-0.0475875	-0.466615	-1.81399	1.03732	-1.0235	0.152501	0.249416	1.86645	-0.450327	-1.81399	1.55547	3.38938	-1.81399	4.30698	3.91487	5.32188	-1.81399	0.973465	2.72617	3.67969	6.91995
ENSMUSG00000040112	Mrps35	Mrps35	232536	4.13649	4.19496	13.6988	0.000403026	0.0272491	up	2cWT-2cKO:8cKO-2cKO	NA	Mrps35	-0.2056	-1.81399	-0.655954	6.73761	3.54241	5.20614	5.29865	3.99721	5.05244	5.56934	-1.81399	5.7902	3.55816	4.57414	-1.46129	-1.3727	-0.0475875	-1.81399	-1.81399	3.00539	3.38581	0.792283	-1.81399	0.264591	-1.81399	-1.26118	-1.81399	-0.189198	-1.81399	5.47407	4.82757	2.22801	2.07587	-0.129601	4.46992	7.34472	1.42041
ENSMUSG00000057497	Fam136a	Fam136a	66488	4.21741	4.07755	16.7929	0.000102996	0.013406	up	2cWT-2cKO:8cKO-2cKO	NA	Fam136a	4.90717	3.12072	-0.304395	0.905285	1.35488	4.8926	4.28722	4.33962	4.10521	5.87912	4.62177	4.82755	2.41437	4.39206	-1.81399	-1.3727	-1.81399	2.13229	-1.81399	-1.81399	-0.51573	-1.02569	-1.81399	-1.47068	-1.81399	-1.81399	2.26235	-1.81399	-1.14955	3.66891	6.42443	5.27756	5.54617	3.75571	3.71304	3.81428	6.90563
ENSMUSG00000084349	Rpl3-ps1	Rpl3-ps1	100043000	4.30771	2.85948	13.4157	0.000458038	0.0299726	up	2cWT-2cKO:8cKO-2cKO	NA	Rpl3-ps1	-1.21727	3.74696	3.95609	-1.81399	-1.81399	-1.81399	3.07328	5.07586	3.95586	0.507634	2.4308	4.77821	1.97418	5.23676	-0.738253	-1.3727	-1.81399	-0.200781	-1.81399	-1.81399	-1.0235	-1.02569	0.0834343	-1.81399	0.042914	-1.81399	-0.862777	-0.939318	-1.81399	3.00044	2.90819	2.61236	4.67774	4.26114	4.04316	2.84316	2.6473
ENSMUSG00000027530	Fabp12	Fabp12	75497	4.52103	-0.038753	12.4321	0.000797706	0.0401741	up	2cWT-2cKO:8cKO-2cKO	NA	Fabp12	-1.21727	-1.81399	1.25454	-1.81399	-1.81399	-1.81399	-1.81399	-1.81399	-1.81399	-0.229281	-1.81399	-1.81399	-1.81399	0.859381	-1.81399	-1.81399	-1.81399	-1.81399	-1.81399	-1.81399	-1.81399	-1.81399	-1.81399	-1.81399	-1.81399	-1.81399	-1.81399	-1.81399	-1.81399	4.41241	-1.81399	-1.81399	-1.81399	-1.81399	-1.44755	-1.81399	-1.81399
ENSMUSG00000066478	Gm5745	Gm5745	436081	4.63486	3.82867	14.5027	0.000281093	0.023201	up	2cWT-2cKO:8cKO-2cKO	NA	Gm5745	-0.796383	2.99585	-1.12177	7.33555	2.27236	-1.81399	-1.05064	5.10875	5.358	-0.229281	-0.773871	5.35818	0.491429	3.51905	-0.401644	-1.81399	-1.38837	-1.21483	-1.81399	-0.897071	-1.81399	-1.81399	-1.81399	3.47694	-1.20569	-1.81399	-0.294451	-1.81399	2.25586	4.87977	2.52019	5.06643	3.93297	5.45754	4.38729	-1.81399	5.69257
ENSMUSG00000027709	Mccc1	Mccc1	72039	4.637	4.20373	15.6446	0.000182943	0.0173754	up	2cWT-2cKO:8cKO-2cKO	NA	Mccc1	-1.81399	-1.45587	-1.81399	0.109239	0.0596176	7.56162	4.81012	1.23781	2.24108	6.02483	6.28167	4.9415	5.24231	4.34271	-1.46129	-1.3727	-1.81399	-1.21483	-1.81399	-1.43989	3.62298	2.33347	-1.81399	-1.19357	0.56332	-1.26118	-1.26137	-0.189198	-1.81399	5.20731	3.49308	3.52427	-0.915587	3.34332	5.90272	6.09957	0.566096
ENSMUSG00000004945	Tmem242	Tmem242	70544	4.67743	2.19986	11.7279	0.000993701	0.0442796	up	2cWT-2cKO:8cKO-2cKO	NA	Tmem242	4.17465	-1.81399	1.14456	-1.81399	-1.81399	0.7879	2.54554	3.6846	1.55046	-1.81399	0.245778	5.71935	0.753772	4.82235	-1.81399	-1.3727	0.217527	-0.792753	-1.40834	-0.686947	-1.81399	-1.81399	-1.81399	-1.47068	-1.81399	-1.81399	-1.81399	-1.81399	-1.81399	3.5682	-0.358349	-1.34221	0.0307989	3.98336	1.83756	-1.81399	-1.81399
ENSMUSG00000020766	Galk1	Galk1	14635	4.72821	5.48017	40.6718	1.25707e-08	2.98483e-05	up	2cWT-2cKO:8cKO-2cKO	NA	Galk1	3.87854	4.70081	4.53766	5.76271	0.847977	6.172	8.02306	6.72695	6.88038	6.82587	6.86488	6.91886	7.07828	7.63697	-1.1781	-0.532292	1.76866	-1.81399	1.73624	-1.43989	-0.140895	-0.518807	-1.81399	-1.81399	1.89337	1.61973	1.84921	-1.31136	-1.14955	3.71674	6.60318	5.95422	3.50361	2.62326	4.05748	5.91715	0.566096
ENSMUSG00000040473	Cfap69	Cfap69	207686	4.84439	-0.855138	13.7308	0.000489116	0.0311479	up	2cWT-2cKO:8cKO-2cKO	8cWT-2cWT	Cfap69	-1.81399	-1.81399	-1.81399	1.79137	-1.81399	-1.81399	-1.81399	-1.81399	-1.81399	-1.81399	-1.81399	-1.81399	-1.81399	-1.81399	-1.81399	-1.81399	-1.81399	-1.81399	-1.81399	-1.81399	-1.81399	-1.81399	-1.81399	-1.81399	-1.81399	-1.81399	-1.81399	-1.81399	-1.81399	-1.81399	-1.81399	2.89437	-1.81399	-1.81399	-1.81399	-1.81399	-1.81399
ENSMUSG00000011486	Slc25a41	Slc25a41	103775	4.95648	2.28812	11.8026	0.000959786	0.0433404	up	2cWT-2cKO:8cKO-2cKO	NA	Slc25a41	3.97526	4.06276	-1.81399	-1.81399	-1.81399	-1.81399	3.6981	5.00192	3.9754	-1.81399	0.83723	2.90643	-1.81399	3.48913	-1.81399	-1.3727	-1.81399	1.31074	-1.81399	-1.81399	-1.81399	-1.81399	-1.81399	-1.47068	-1.81399	-1.81399	-1.81399	-1.81399	-1.81399	2.87956	3.78008	-0.0824149	-1.81399	4.87035	1.99467	0.620496	-1.81399
ENSMUSG00000030281	Il17rc	Il17rc	171095	4.97867	-0.31224	12.9664	0.000561778	0.0339539	up	2cWT-2cKO:8cKO-2cKO	8cWT-2cWT	Il17rc	2.50464	-1.81399	-1.81399	-1.81399	-1.81399	-1.81399	-1.81399	-1.81399	-1.81399	-1.81399	-1.81399	-1.35668	-1.81399	-1.81399	-1.81399	-1.81399	-1.81399	-1.81399	-1.81399	-1.43989	-1.81399	-1.81399	-1.81399	-1.47068	-1.81399	-1.81399	-1.81399	-1.81399	-1.81399	-1.81399	-1.81399	-1.34221	-0.915587	0.810367	3.47771	-1.81399	-1.81399
ENSMUSG00000081455	NA	ENSMUSG00000081455	NA	5.10952	0.738735	12.4169	0.000722523	0.0382454	up	2cWT-2cKO:8cKO-2cKO	NA	ENSMUSG00000081455	3.02713	-1.45587	2.86581	-1.81399	-1.81399	0.201254	-1.05064	-0.879239	-1.35775	0.507634	0.83723	-0.496733	-0.824285	1.93162	-1.81399	-1.03526	-1.81399	-1.81399	-1.81399	-1.43989	-1.81399	-1.81399	-1.81399	-1.19357	-0.450327	-1.81399	-1.81399	-1.81399	-1.81399	-0.487658	-1.49325	1.17927	4.00097	-1.01655	2.05302	-0.13463	2.34166
ENSMUSG00000025025	Mxi1	Mxi1	17859	5.14819	4.27797	24.986	3.58097e-06	0.00184835	up	2cWT-2cKO:8cKO-2cKO	NA	Mxi1	1.8621	3.45179	3.92316	7.71402	6.14483	5.47295	5.67979	4.94234	4.40085	5.92034	4.72372	4.04563	3.16599	0.293787	-1.81399	-1.03526	-0.792902	1.31074	-1.81399	-1.81399	-1.81399	-0.518807	4.02714	0.353552	-1.81399	-0.862492	1.18623	-0.939318	1.18951	1.97417	4.99708	3.88811	5.36878	3.94455	2.76159	-1.81399	2.6473
ENSMUSG00000027447	Cst3	Cst3	13010	5.15501	2.34332	11.8728	0.000929007	0.042777	up	2cWT-2cKO:8cKO-2cKO	NA	Cst3	-1.81399	2.98129	4.86692	-1.81399	-1.81399	-1.81399	-0.554045	2.01562	4.12284	-1.81399	3.26275	2.90643	-0.242772	5.2811	-1.81399	-1.3727	-1.81399	-1.81399	-1.81399	-1.81399	-1.0235	-1.81399	-1.81399	0.795891	-1.81399	-1.26118	-1.81399	-0.643817	-1.81399	-1.81399	-0.816967	-1.81399	-1.81399	0.973465	-1.81399	-1.81399	5.99273
ENSMUSG00000063087	Gm10125	Gm10125	791318	5.17468	-1.07579	15.9257	0.000161385	0.0165548	up	2cWT-2cKO:8cKO-2cKO	8cWT-2cWT	Gm10125	-1.81399	2.37084	-1.81399	-1.81399	-1.81399	-1.81399	-1.81399	-1.81399	-1.81399	-1.81399	-1.81399	-1.81399	-1.81399	-1.81399	-1.46129	-1.81399	-1.81399	-1.81399	-1.81399	-1.81399	-1.81399	-1.81399	-1.81399	-1.81399	-1.81399	-1.81399	-1.81399	-1.81399	-1.81399	0.439729	-1.81399	-0.465039	-1.81399	-1.81399	-1.81399	-1.81399	-1.81399
ENSMUSG00000057551	Zfp317	Zfp317	244713	5.23168	2.76684	14.0074	0.000350788	0.0255884	up	2cWT-2cKO:8cKO-2cKO	NA	Zfp317	3.72804	2.76023	2.79477	5.65313	2.48257	4.0886	-1.81399	0.660524	-1.35775	-1.81399	-1.81399	1.13342	2.62572	4.42405	-0.738253	-0.761965	-1.38837	-1.81399	-1.81399	-1.81399	-1.0235	-1.81399	-1.81399	-1.81399	-1.81399	-1.81399	-1.81399	-1.31136	2.48748	-1.81399	2.90819	3.87735	-1.81399	-1.81399	4.2063	0.620496	6.14679
ENSMUSG00000018574	Acadvl	Acadvl	11370	5.23837	1.97148	12.5531	0.000678703	0.037223	up	2cWT-2cKO:8cKO-2cKO	NA	Acadvl	-1.81399	-1.81399	3.95609	-1.81399	-1.81399	-1.81399	-1.81399	3.6846	5.13727	-1.81399	-1.81399	3.43109	2.48831	4.8343	-1.81399	-1.81399	-1.81399	-1.81399	-1.81399	-1.81399	-1.81399	-1.81399	-1.81399	-0.0408644	-1.81399	-1.81399	-1.81399	-1.81399	-1.81399	3.82982	1.50257	2.04783	2.50852	-1.81399	-1.44755	-1.81399	-1.81399
ENSMUSG00000033735	Spr	Spr	20751	5.25464	2.56059	17.3612	8.06742e-05	0.0117622	up	2cWT-2cKO:8cKO-2cKO	NA	Spr	-1.81399	-1.81399	-0.304395	-1.81399	-1.81399	2.79042	4.71526	3.37784	4.15746	4.11637	5.8721	1.55401	4.65743	-1.81399	-1.81399	-1.81399	-1.06013	-1.81399	-1.81399	-1.81399	-1.81399	-1.81399	-1.81399	-1.81399	-1.81399	-1.81399	-1.81399	-1.81399	-1.81399	2.79295	4.33495	0.21971	0.0307989	3.92475	-0.705176	-0.13463	-1.81399
ENSMUSG00000109005	NA	ENSMUSG00000109005	NA	5.29063	1.09216	13.6973	0.000403302	0.0272491	up	2cWT-2cKO:8cKO-2cKO	NA	ENSMUSG00000109005	-1.81399	2.49907	-1.81399	-1.81399	-1.81399	-1.81399	-1.81399	0.537079	3.77815	-1.81399	-0.773871	3.21737	4.16567	-1.81399	-1.81399	-1.81399	-1.81399	-1.81399	-1.81399	-1.43989	-1.81399	-1.81399	-1.81399	-1.81399	-1.81399	-1.81399	-1.81399	-1.81399	-1.81399	-1.81399	-0.117675	4.32024	-1.81399	-1.81399	-1.81399	-1.81399	-1.81399
ENSMUSG00000107304	NA	ENSMUSG00000107304	NA	5.31978	2.73063	14.6433	0.000264038	0.0226216	up	2cWT-2cKO:8cKO-2cKO	NA	ENSMUSG00000107304	-1.81399	-1.81399	-1.81399	4.92913	-1.81399	-1.81399	0.108105	3.26565	0.730876	6.68149	0.245778	0.986687	-0.824285	0.148183	-1.81399	-1.81399	-1.81399	-1.21483	-1.81399	-1.81399	-1.81399	-1.02569	-1.81399	-0.585449	0.042914	-1.26118	-1.81399	-1.81399	-1.81399	3.11196	1.13502	3.82231	3.78652	5.15164	3.93095	-0.13463	-1.81399
ENSMUSG00000110605	Gm32856	Gm32856	102635552	5.35114	2.84695	16.9023	9.82506e-05	0.0131695	up	2cWT-2cKO:8cKO-2cKO	NA	Gm32856	-1.81399	3.63044	-1.81399	-1.81399	-1.81399	-1.81399	3.07328	4.90538	1.9953	-1.81399	-1.81399	5.58553	-0.242772	3.80069	-1.81399	-1.81399	-1.38837	-1.21483	-1.81399	-1.81399	-1.81399	-1.81399	-1.81399	-1.81399	-1.20569	-1.26118	-1.81399	-1.81399	-1.81399	-1.81399	5.13429	5.08526	4.85968	2.35387	3.77502	-1.81399	4.59733
ENSMUSG00000091697	Eif3s6-ps2	Eif3s6-ps2	16343	5.39195	1.62794	14.4155	0.000292244	0.023201	up	2cWT-2cKO:8cKO-2cKO	NA	Eif3s6-ps2	-1.81399	3.30746	-0.304395	-1.81399	-1.81399	-1.81399	0.560241	4.47191	4.68814	-0.229281	-1.81399	3.9299	-0.824285	0.950052	-1.46129	-1.81399	-1.81399	-1.81399	-1.81399	-1.81399	-1.81399	-1.81399	-1.81399	-1.81399	-1.20569	-1.26118	-1.81399	-1.81399	-1.81399	-1.00349	0.988257	-1.34221	-0.915587	0.415619	4.49644	-1.81399	-1.81399
ENSMUSG00000114003	Gm9616	Gm9616	674228	5.39272	1.37302	12.9916	0.000555362	0.033812	up	2cWT-2cKO:8cKO-2cKO	NA	Gm9616	-1.81399	-1.1692	4.96725	-1.81399	-1.81399	-1.81399	0.108105	-0.879239	0.98332	-0.229281	1.2555	2.56229	-1.81399	-0.405205	-1.46129	-1.81399	-0.792902	-1.21483	-1.81399	-1.1431	-1.81399	-0.518807	-1.81399	-1.47068	-1.20569	-1.26118	-1.81399	-1.81399	-1.14955	-1.81399	3.5639	1.96894	-0.915587	0.168613	4.56822	-1.81399	-1.81399
ENSMUSG00000081344	NA	ENSMUSG00000081344	NA	5.41067	1.06166	12.879	0.000584624	0.0343085	up	2cWT-2cKO:8cKO-2cKO	NA	ENSMUSG00000081344	-0.47096	-1.45587	-0.304395	-1.81399	4.61668	0.201254	1.70473	-0.879239	1.78996	-1.81399	0.245778	0.537292	1.48935	3.48913	0.202664	-1.81399	-1.06013	-1.81399	-1.81399	-1.81399	-1.81399	-1.81399	-1.81399	-1.81399	-1.20569	-1.81399	-1.81399	-1.81399	-1.81399	3.64439	0.704649	1.49297	0.814552	-1.01655	0.750607	-1.81399	-1.81399
ENSMUSG00000028194	Ddah1	Ddah1	69219	5.4738	2.94076	17.6969	6.98935e-05	0.01123	up	2cWT-2cKO:8cKO-2cKO	NA	Ddah1	-1.81399	-1.81399	-1.81399	-1.81399	-1.81399	3.6977	0.108105	0.774235	0.903981	2.43358	-0.17578	4.90621	4.73542	5.27673	-1.81399	-1.3727	-1.06013	-1.81399	-1.81399	-1.81399	-1.81399	-1.81399	-1.81399	-1.81399	-1.20569	-1.81399	-1.81399	-1.81399	-1.81399	6.17631	5.36496	4.35167	0.814552	-1.01655	4.38161	-1.81399	-1.81399
ENSMUSG00000020333	Acsl6	Acsl6	216739	5.48966	0.983904	13.8455	0.000377261	0.0265697	up	2cWT-2cKO:8cKO-2cKO	NA	Acsl6	2.83431	-1.81399	-1.81399	-1.81399	-1.81399	-1.81399	-1.81399	-1.2722	3.91597	-1.81399	-1.81399	-1.81399	-1.81399	5.23676	-1.81399	-1.81399	-1.81399	-1.81399	-1.81399	-1.81399	-1.81399	-1.81399	-1.81399	-1.81399	-1.81399	-1.26118	-1.81399	-1.81399	-1.81399	-0.10847	0.640566	-1.81399	-1.81399	-1.81399	-1.81399	-1.81399	-1.81399
ENSMUSG00000102246	NA	ENSMUSG00000102246	NA	5.52668	0.0695061	11.5913	0.00105894	0.0458583	up	2cWT-2cKO:8cKO-2cKO	NA	ENSMUSG00000102246	-1.81399	-1.81399	-1.81399	3.86602	-1.81399	-1.81399	-1.81399	-1.2722	-1.35775	-1.81399	-1.81399	-1.81399	-1.81399	1.52275	-1.81399	-0.761965	-1.81399	-1.81399	-1.81399	-1.81399	-1.0235	-1.81399	-1.81399	-1.81399	-1.81399	-1.81399	-1.81399	-1.81399	-1.81399	-1.00349	2.67217	-1.81399	-1.81399	-1.81399	2.55503	-0.13463	-1.81399
ENSMUSG00000068735	Trp53i11	Trp53i11	277414	5.55442	2.0226	15.5479	0.000177059	0.0172044	up	2cWT-2cKO:8cKO-2cKO	NA	Trp53i11	-1.81399	-1.81399	3.56593	-1.81399	-1.81399	-1.81399	4.8404	4.10981	3.36936	-1.81399	4.01862	-1.35668	5.67325	1.74163	-1.81399	-1.03526	-1.81399	-1.81399	-1.81399	-1.81399	-1.81399	-1.81399	-1.81399	-1.81399	-1.81399	-1.81399	-1.81399	-1.81399	-1.14955	-1.81399	0.640566	-1.81399	0.597438	-1.81399	-1.81399	-1.81399	-1.81399
ENSMUSG00000104528	NA	ENSMUSG00000104528	NA	5.55514	1.28993	11.9788	0.000884454	0.0423646	up	2cWT-2cKO:8cKO-2cKO	NA	ENSMUSG00000104528	2.26331	3.82244	-0.304395	-1.81399	2.02621	-1.81399	-1.81399	-1.2722	-1.81399	5.58651	1.06147	-1.81399	-1.81399	-1.31443	-1.81399	-1.81399	-1.81399	-1.81399	-1.81399	-1.81399	-1.81399	-1.81399	-1.81399	-1.19357	-1.81399	-1.81399	0.112196	-1.81399	-1.81399	-1.81399	-1.81399	2.00892	-1.81399	0.810367	1.96459	-1.81399	-1.81399
ENSMUSG00000051048	P4ha3	P4ha3	320452	5.59023	1.96096	14.2352	0.000316745	0.0240236	up	2cWT-2cKO:8cKO-2cKO	NA	P4ha3	4.2317	-1.81399	-1.81399	0.109239	-1.81399	-1.81399	-0.554045	2.89021	4.62769	-1.81399	2.96264	0.180169	3.68936	3.6734	-1.81399	-1.81399	-1.81399	-1.81399	-1.81399	-1.81399	-1.81399	-1.81399	-1.81399	-1.47068	-1.81399	-1.81399	-1.81399	-0.643817	-0.696359	-1.81399	0.0885315	2.44757	-1.81399	5.36505	-0.523652	-1.81399	-1.81399
ENSMUSG00000072407	NA	ENSMUSG00000072407	NA	5.67106	0.445154	17.2131	8.59631e-05	0.0122119	up	2cWT-2cKO:8cKO-2cKO	NA	ENSMUSG00000072407	-1.21727	-1.81399	2.46941	-1.81399	-1.81399	1.6639	0.351813	0.0869953	1.32536	3.47104	2.067	0.309284	-0.242772	1.46242	-1.81399	-1.81399	-1.81399	-1.81399	-1.81399	-1.81399	-1.81399	-1.81399	-1.81399	-1.81399	-1.81399	-1.81399	-1.81399	-1.81399	-1.14955	-1.81399	0.429233	1.60156	1.17005	0.626453	-1.15558	1.48047	-1.81399
ENSMUSG00000083557	NA	ENSMUSG00000083557	NA	5.79585	2.14478	20.1019	2.5467e-05	0.00572009	up	2cWT-2cKO:8cKO-2cKO	8cWT-8cKO	ENSMUSG00000083557	2.54121	-1.45587	2.16589	-1.81399	-1.81399	-0.803809	-1.81399	-1.81399	-1.35775	-1.81399	-1.81399	-0.730648	-0.242772	-1.81399	-1.46129	-1.3727	-1.81399	-1.81399	-1.81399	-1.81399	-1.81399	-1.81399	-1.81399	-1.81399	-1.81399	-1.81399	-1.81399	-1.81399	-1.81399	4.08804	0.503171	2.47638	6.0149	0.973465	1.06606	5.72548	-1.81399
ENSMUSG00000004113	Cacna1b	Cacna1b	12287	5.81643	2.26304	15.8272	0.000156672	0.0165548	up	2cWT-2cKO:8cKO-2cKO	8cWT-8cKO:8cWT-2cWT	Cacna1b	2.34832	2.128	4.50465	-1.81399	0.0596176	5.74535	-1.05064	-1.81399	-1.81399	-0.229281	-1.81399	-0.496733	-1.81399	-1.81399	-1.46129	-1.81399	-1.38837	-1.21483	-1.81399	-1.81399	-1.81399	-1.02569	0.398257	-1.81399	-1.81399	1.18675	-1.81399	-1.81399	-1.81399	-1.81399	-1.23101	4.51329	3.19069	-1.01655	5.48203	-1.81399	-1.81399
ENSMUSG00000091941	NA	ENSMUSG00000091941	NA	5.82632	1.97872	17.4336	7.82125e-05	0.0117482	up	2cWT-2cKO:8cKO-2cKO	NA	ENSMUSG00000091941	4.16296	-0.545695	-0.304395	0.109239	-1.81399	5.01347	-0.185311	3.44807	4.26457	2.09255	1.95966	2.10947	0.753772	2.13857	-0.941477	-1.81399	-1.81399	-0.792753	-1.40834	-1.81399	0.402713	-1.81399	-1.27372	-1.19357	-1.81399	-1.26118	-1.81399	-1.81399	-1.81399	0.191513	4.72701	0.952023	1.31958	1.25298	0.146412	-1.81399	-1.81399
ENSMUSG00000094595	Fsbp	Fsbp	100503583	5.84134	2.02396	16.6561	0.000109267	0.0138128	up	2cWT-2cKO:8cKO-2cKO	NA	Fsbp	-0.47096	2.7257	3.60798	-1.81399	-1.81399	1.78958	3.58342	-0.879239	3.78923	-0.229281	2.90593	-1.35668	-1.81399	-1.31443	-0.401644	-1.81399	-1.81399	-1.81399	-1.81399	-1.81399	-1.0235	-1.81399	-1.81399	-1.81399	-1.81399	-1.81399	-1.81399	-1.81399	-1.81399	2.79295	2.55538	1.54828	-1.81399	-1.01655	2.95761	5.99007	-1.81399
ENSMUSG00000062012	Zfp13	Zfp13	22654	5.8443	0.813863	12.1508	0.000816796	0.0407287	up	2cWT-2cKO:8cKO-2cKO	NA	Zfp13	-1.81399	4.05582	3.78336	-1.81399	-1.81399	-1.81399	1.78995	-1.81399	-1.81399	-1.81399	-1.81399	-1.81399	-0.824285	-1.81399	-1.81399	0.263359	-1.38837	-1.81399	-1.81399	-1.81399	-1.81399	-1.81399	-1.81399	-1.81399	-1.81399	-1.81399	-1.81399	-1.81399	-1.81399	3.1818	1.1808	-1.81399	-1.81399	-1.81399	3.10278	-1.81399	-1.81399
ENSMUSG00000054793	Cadm4	Cadm4	260299	5.86685	2.16217	16.2194	0.000132044	0.01493	up	2cWT-2cKO:8cKO-2cKO	NA	Cadm4	-0.2056	3.35342	-1.81399	-1.81399	5.16593	0.7879	-1.81399	1.96861	-0.298064	2.57796	4.58613	2.07356	-0.824285	4.27417	-1.81399	-1.81399	-1.81399	-1.21483	-1.81399	-1.81399	-1.81399	-1.81399	-1.81399	-0.428858	0.237992	-1.81399	-0.862777	-1.81399	-1.81399	-1.81399	2.80965	0.777838	-0.366145	5.16857	2.47192	-0.13463	-1.81399
ENSMUSG00000044626	Liph	Liph	239759	5.90513	1.8668	13.8908	0.000369655	0.0263693	up	2cWT-2cKO:8cKO-2cKO	NA	Liph	-1.81399	0.407205	2.60017	-1.81399	-1.81399	5.05161	3.99587	-1.81399	-1.81399	-1.81399	-1.81399	1.74873	-1.81399	-1.81399	0.202664	-1.81399	-1.81399	-1.21483	-1.81399	-1.81399	-1.81399	-1.02569	-1.81399	-1.81399	-1.20569	-1.81399	-1.81399	-1.81399	-1.81399	4.06973	-1.49325	-1.34221	-0.915587	3.00907	-1.44755	-1.81399	5.47704
ENSMUSG00000046223	Plaur	Plaur	18793	5.96854	3.17516	20.9042	1.8307e-05	0.00447952	up	2cWT-2cKO:8cKO-2cKO	NA	Plaur	-1.81399	-1.81399	-1.81399	-1.81399	4.32098	-1.81399	5.00984	3.88776	5.0616	-1.81399	6.11658	3.02398	1.97418	5.79075	-1.81399	-1.81399	-1.81399	-1.81399	-1.81399	-1.81399	-1.81399	-1.81399	-1.27372	-1.81399	-1.81399	-1.81399	-1.26137	-0.939318	-1.81399	5.69911	1.22517	0.682166	3.37283	4.05798	2.79617	-1.81399	-1.81399
ENSMUSG00000023827	Agpat4	Agpat4	68262	5.9747	1.5737	12.873	0.000586224	0.0343085	up	2cWT-2cKO:8cKO-2cKO	NA	Agpat4	-1.81399	-1.81399	6.14333	-1.81399	-1.81399	-1.81399	-1.81399	-1.81399	-1.81399	-1.81399	0.83723	1.06192	-1.81399	-1.81399	-1.81399	-1.81399	-1.81399	-1.81399	-1.81399	-1.1431	-1.0235	-1.81399	0.249416	0.591608	-1.81399	-1.81399	-1.81399	-1.81399	-1.81399	-1.81399	1.82438	1.10742	-1.81399	3.71016	-1.81399	2.40501	-1.81399
ENSMUSG00000031816	Mthfsd	Mthfsd	234814	6.04339	2.91961	23.0842	7.5854e-06	0.00267783	up	2cWT-2cKO:8cKO-2cKO	NA	Mthfsd	-1.81399	-1.81399	3.74619	-1.81399	-1.81399	-1.81399	-1.81399	4.78166	2.60946	4.01853	3.26275	3.00504	1.62667	4.49353	-1.81399	-1.81399	-1.81399	-1.81399	-1.81399	-1.81399	-1.0235	-1.81399	-1.81399	-1.47068	-1.81399	-1.81399	-1.81399	-1.81399	-1.81399	0.191513	4.50655	5.28165	2.68426	3.61451	4.1738	-0.13463	6.12223
ENSMUSG00000106035	NA	ENSMUSG00000106035	NA	6.11148	0.50094	16.4076	0.000143864	0.0157091	up	2cWT-2cKO:8cKO-2cKO	NA	ENSMUSG00000106035	2.74307	-1.81399	-1.81399	-1.81399	0.0596176	-1.81399	-1.05064	-0.316699	4.27249	-1.81399	-1.81399	-1.81399	-1.81399	-1.81399	-1.81399	-1.81399	-1.81399	-1.81399	-1.81399	-1.81399	-1.81399	-1.81399	-1.81399	-1.81399	-1.81399	-1.81399	-1.81399	-1.81399	-1.81399	-1.81399	-1.81399	2.85103	-1.81399	2.67159	-1.81399	-1.81399	0.566096
ENSMUSG00000021474	Sfxn1	Sfxn1	14057	6.12903	1.54559	17.4028	7.92491e-05	0.0117482	up	2cWT-2cKO:8cKO-2cKO	NA	Sfxn1	3.66316	-1.81399	-1.12177	0.109239	-1.81399	-1.81399	3.45883	1.86974	3.00125	-1.81399	-0.773871	1.83705	-1.81399	-1.31443	-1.46129	-1.81399	-1.81399	-1.81399	-1.81399	-1.81399	-1.81399	-1.81399	-1.81399	-1.81399	-1.81399	-1.26118	-1.81399	-1.81399	-1.81399	4.97135	-1.81399	3.88811	-1.81399	-0.505962	-1.81399	0.620496	3.61418
ENSMUSG00000019368	Sec14l4	Sec14l4	103655	6.15441	1.70658	15.4109	0.000188044	0.0175589	up	2cWT-2cKO:8cKO-2cKO	NA	Sec14l4	-1.81399	-1.81399	-1.81399	-1.81399	-1.81399	3.93384	-1.81399	-1.81399	2.53241	-1.81399	0.83723	-1.81399	0.170539	4.30885	-1.81399	-1.81399	-1.81399	-1.21483	-1.81399	-1.81399	-1.81399	-1.81399	-1.81399	-1.81399	-1.81399	-1.26118	-1.81399	-1.81399	-1.81399	-1.81399	-0.117675	-1.81399	2.56951	-1.81399	-0.912872	6.00422	-1.81399
ENSMUSG00000029049	Morn1	Morn1	76866	6.17776	2.10903	16.1979	0.000133284	0.0149684	up	2cWT-2cKO:8cKO-2cKO	8cWT-2cWT	Morn1	3.24231	-1.81399	-1.12177	-1.81399	6.14483	-0.803809	-1.81399	-1.81399	-1.81399	1.3556	0.571603	-1.81399	-1.81399	-0.944065	-1.1781	-1.81399	-1.81399	-1.81399	-1.09207	-1.81399	-1.81399	0.955004	-1.81399	-0.76113	-1.20569	-1.26118	-1.81399	-1.81399	-1.81399	-1.00349	4.24083	-0.261079	5.31637	2.67159	0.146412	-1.81399	-1.81399
ENSMUSG00000109904	NA	ENSMUSG00000109904	NA	6.25998	-0.0596797	15.7605	0.000161309	0.0165548	up	2cWT-2cKO:8cKO-2cKO	NA	ENSMUSG00000109904	-1.81399	3.89417	-1.81399	-1.81399	-1.81399	-1.81399	2.44402	-1.81399	-1.81399	-1.81399	-1.81399	-0.730648	-0.242772	-1.81399	-1.46129	-1.81399	-1.81399	-1.81399	-1.81399	-1.81399	-1.81399	-1.81399	-1.81399	-1.81399	-1.81399	-1.26118	-1.81399	-1.81399	-1.81399	-1.81399	1.50257	-1.81399	-1.81399	-1.81399	-0.362437	-1.81399	-1.81399
ENSMUSG00000104369	NA	ENSMUSG00000104369	NA	6.27683	0.785269	14.3719	0.000297984	0.0234729	up	2cWT-2cKO:8cKO-2cKO	NA	ENSMUSG00000104369	-1.81399	-1.81399	4.16769	-1.81399	-1.81399	-1.81399	-1.81399	-1.2722	2.14082	-1.81399	-0.17578	-1.81399	-1.81399	-0.0137838	-1.81399	-1.81399	-0.792902	-1.81399	-1.81399	-1.81399	-1.81399	-1.81399	-1.81399	-1.81399	-1.81399	-1.81399	-1.81399	-1.81399	-1.81399	-1.81399	-1.49325	4.84687	-1.81399	-1.81399	-1.81399	-1.81399	-1.81399
ENSMUSG00000087590	Epb41l4aos	Epb41l4aos	69749	6.30931	2.81641	23.964	5.34924e-06	0.00240296	up	2cWT-2cKO:8cKO-2cKO	NA	Epb41l4aos	2.21885	3.34207	1.78101	-1.81399	-1.81399	-1.81399	6.15973	4.23426	2.50579	2.09255	6.67433	-1.81399	2.75117	4.07703	-1.1781	-1.81399	-1.38837	-1.81399	-1.81399	-1.81399	-1.81399	-1.81399	-1.81399	-1.81399	-1.81399	-1.81399	-1.81399	-1.81399	-1.81399	-0.487658	-1.81399	2.76024	-1.81399	-0.129601	0.146412	-1.81399	-1.81399
ENSMUSG00000082938	Gm2810	Gm2810	100040502	6.39592	0.337003	15.4231	0.000187041	0.0175589	up	2cWT-2cKO:8cKO-2cKO	NA	Gm2810	3.15061	-0.72516	-1.12177	-1.81399	-1.81399	3.76046	-1.81399	-1.81399	0.534132	-1.81399	-1.81399	-1.81399	-1.81399	-1.81399	-1.81399	-1.81399	-1.81399	-1.81399	-1.81399	-1.81399	-1.81399	-1.81399	-1.27372	-1.81399	-1.81399	-1.81399	-1.81399	-1.31136	-1.14955	-1.81399	-1.23101	-1.81399	-1.81399	-1.81399	3.57051	-1.81399	-1.81399
ENSMUSG00000083914	Rps18-ps1	Rps18-ps1	100039979	6.40061	0.952181	21.316	1.99789e-05	0.00474384	up	2cWT-2cKO:8cKO-2cKO	NA	Rps18-ps1	-1.81399	3.01027	-1.12177	0.109239	-1.81399	-1.81399	1.61416	2.41678	1.60164	-1.81399	1.06147	2.9267	-1.81399	2.80575	-1.81399	-1.81399	-1.81399	-1.81399	-1.81399	-1.81399	-1.81399	-1.81399	-1.81399	-1.81399	-1.81399	-1.81399	-1.81399	-1.81399	-1.81399	-1.00349	2.73489	0.21971	2.50852	3.18586	1.80397	-1.81399	-1.81399
ENSMUSG00000085706	NA	ENSMUSG00000085706	NA	6.40415	1.24643	14.2104	0.00034015	0.0252394	up	2cWT-2cKO:8cKO-2cKO	8cWT-8cKO:8cWT-2cWT	ENSMUSG00000085706	-1.81399	-1.81399	5.14913	-1.81399	-1.81399	-1.81399	-1.81399	-1.81399	-1.81399	-1.81399	-1.81399	-1.81399	-1.81399	-1.81399	-1.46129	-0.532292	-1.81399	-1.81399	-1.81399	-1.81399	-1.81399	-1.81399	-1.27372	-1.81399	-1.20569	-1.81399	-1.81399	-1.81399	-1.81399	4.80429	-1.81399	-1.81399	-1.81399	-1.81399	3.72206	-1.81399	-1.81399
ENSMUSG00000106869	NA	ENSMUSG00000106869	NA	6.5566	1.55257	17.7395	6.86364e-05	0.01123	up	2cWT-2cKO:8cKO-2cKO	NA	ENSMUSG00000106869	-1.81399	-1.45587	-1.81399	-1.81399	4.20721	-1.81399	-1.05064	4.9843	-0.732722	-1.81399	3.47253	-1.81399	3.62525	0.54717	-1.81399	-1.81399	-1.06013	-1.81399	-1.81399	-1.81399	-1.81399	-1.81399	-1.81399	-1.81399	-1.81399	-1.81399	-1.81399	-1.81399	-1.81399	1.61893	-1.81399	-0.0824149	4.35289	-1.81399	-1.81399	-1.81399	0.566096
ENSMUSG00000107395	NA	ENSMUSG00000107395	NA	6.57908	1.12492	17.2531	8.44997e-05	0.0122119	up	2cWT-2cKO:8cKO-2cKO	NA	ENSMUSG00000107395	-1.81399	-0.930165	-1.81399	4.21352	-1.81399	-0.803809	-1.81399	-0.316699	2.9429	-1.81399	-1.81399	1.83705	-1.81399	3.11099	-1.46129	-1.81399	-1.81399	-1.81399	-1.81399	-1.81399	-1.81399	-1.81399	-1.81399	-1.81399	-1.81399	-1.81399	-1.26137	-1.81399	-1.81399	-1.81399	1.26821	1.31304	-1.81399	-1.81399	4.80734	-1.81399	-1.81399
ENSMUSG00000027164	Traf6	Traf6	22034	6.70704	0.553846	16.5826	0.000112795	0.014096	up	2cWT-2cKO:8cKO-2cKO	NA	Traf6	-0.47096	4.37281	-0.304395	-1.81399	-1.81399	-0.803809	-1.81399	1.31501	-0.499085	-1.81399	-1.81399	-1.81399	-1.81399	1.46242	-1.46129	-1.81399	-1.81399	-1.81399	-1.81399	-1.81399	-1.81399	-1.81399	-1.81399	-1.19357	-1.81399	-1.81399	-1.81399	-1.81399	-1.81399	-1.81399	-1.81399	-1.81399	-1.81399	-1.81399	-1.81399	4.15594	-1.81399
ENSMUSG00000035849	Krt222	Krt222	268481	6.80466	1.18856	16.9698	0.000113909	0.014129	up	2cWT-2cKO:8cKO-2cKO	NA	Krt222	-1.81399	-1.81399	-1.81399	-1.81399	3.63331	-1.81399	-1.81399	-1.81399	-1.35775	5.85097	-1.81399	-1.81399	-1.81399	-1.81399	-1.81399	-1.81399	-1.81399	-1.81399	-1.81399	-1.81399	-1.81399	-1.81399	-1.81399	-1.81399	-1.81399	-1.81399	-1.81399	-1.81399	-1.81399	-1.00349	-1.23101	-1.81399	-1.81399	3.0824	-1.81399	-1.81399	-1.81399
ENSMUSG00000059363	Fxn	Fxn	14297	6.83082	2.15449	19.5703	3.17495e-05	0.00635793	up	2cWT-2cKO:8cKO-2cKO	NA	Fxn	3.32853	-1.81399	-1.81399	-1.81399	-1.81399	5.88568	-1.81399	0.879633	3.72143	-0.229281	2.72109	0.0383515	2.921	-0.944065	-1.81399	-1.81399	-1.81399	-1.81399	-1.09207	-1.81399	-1.81399	-1.81399	-1.81399	-1.81399	-1.81399	0.429532	-1.81399	-1.81399	-1.81399	4.67708	-0.232999	2.99734	4.26343	-1.01655	1.22677	-1.81399	-1.81399
ENSMUSG00000109429	NA	ENSMUSG00000109429	NA	6.83721	2.07329	19.4374	3.35578e-05	0.00657157	up	2cWT-2cKO:8cKO-2cKO	NA	ENSMUSG00000109429	-1.21727	0.221383	4.9992	-1.81399	-1.81399	5.53709	2.01902	-1.81399	0.635855	-1.81399	-1.81399	-1.35668	-1.81399	-1.81399	-1.81399	-1.81399	-0.200979	-1.81399	-1.09207	-1.81399	-1.81399	-0.518807	-1.81399	-1.81399	-1.81399	-1.26118	-1.81399	-1.81399	-1.14955	5.43885	-0.647373	3.7997	-1.81399	0.415619	-0.912872	-1.81399	0.566096
ENSMUSG00000027296	Itpka	Itpka	228550	6.84865	1.51558	19.5569	3.98897e-05	0.00736674	up	2cWT-2cKO:8cKO-2cKO	NA	Itpka	-1.81399	-1.81399	-1.81399	-1.81399	-1.81399	3.6321	1.61416	-1.81399	4.15746	-1.81399	5.14715	1.06192	-1.81399	-1.81399	-1.81399	-1.81399	-1.81399	-1.81399	-1.81399	-1.81399	-1.81399	-1.81399	-1.81399	-1.81399	-1.81399	-1.81399	-1.81399	-1.81399	-1.81399	-1.00349	-1.81399	0.469389	2.68426	-1.81399	1.46029	4.10433	-1.81399
ENSMUSG00000078630	Tomt	Tomt	791260	6.97379	1.08719	15.7391	0.000162824	0.0165548	up	2cWT-2cKO:8cKO-2cKO	NA	Tomt	-1.81399	2.37084	-1.81399	1.41531	5.03866	-1.81399	-1.81399	0.879633	-1.81399	-1.81399	-1.81399	-1.81399	-1.81399	3.97275	-1.81399	-1.81399	-1.81399	-1.81399	-1.81399	-1.81399	-1.81399	-1.81399	-1.81399	-1.81399	-1.81399	-0.294066	-1.81399	-1.81399	-1.81399	-1.81399	3.74242	-1.81399	-1.81399	-1.81399	-1.81399	-1.81399	-1.81399
ENSMUSG00000086549	Gm13648	Gm13648	100415901	6.99014	1.88664	16.182	0.000144606	0.0157091	up	2cWT-2cKO:8cKO-2cKO	8cWT-8cKO:8cWT-2cWT	Gm13648	-1.81399	-1.81399	-1.81399	-1.81399	6.7123	-1.81399	-1.81399	-1.81399	-1.81399	-1.81399	-1.81399	-1.81399	-1.81399	-1.81399	-1.81399	0.773224	-1.81399	-1.81399	-1.81399	-1.81399	-1.81399	-1.81399	-1.81399	-1.81399	-1.81399	-1.81399	-1.81399	-1.81399	-0.696359	3.76304	-1.81399	-1.81399	3.53453	0.626453	-1.81399	-1.81399	-1.81399
ENSMUSG00000085433	Gm16001	Gm16001	108169069	7.02469	0.683029	19.4058	3.40025e-05	0.00657157	up	2cWT-2cKO:8cKO-2cKO	NA	Gm16001	-1.81399	2.49907	4.19554	-1.81399	-1.81399	-1.81399	-1.81399	-0.879239	-1.81399	-1.81399	-1.81399	-1.81399	0.491429	-1.81399	-1.81399	-1.81399	-1.81399	-1.81399	-1.40834	-1.81399	-1.81399	-1.81399	-1.81399	-1.47068	-1.81399	-1.81399	-1.81399	-1.81399	-1.81399	-1.81399	-1.81399	1.03182	-0.915587	2.41193	-1.44755	-1.81399	4.36585
ENSMUSG00000018387	Shroom1	Shroom1	71774	7.27694	1.73298	17.6239	7.85696e-05	0.0117482	up	2cWT-2cKO:8cKO-2cKO	8cWT-8cKO:8cWT-2cWT	Shroom1	0.67414	-1.81399	-1.81399	6.63759	-1.81399	-1.81399	-1.81399	-1.81399	-1.81399	-1.81399	-1.81399	-1.81399	-1.81399	-1.81399	-1.1781	-1.81399	-1.81399	-1.81399	-1.81399	-1.81399	-1.81399	0.152501	-1.81399	-1.81399	-0.450327	-1.81399	-1.81399	-1.81399	-1.81399	-1.81399	-1.81399	-0.987281	-1.81399	-0.129601	4.01408	-1.81399	-1.81399
ENSMUSG00000061877	BC048679	BC048679	210321	7.30552	0.25851	21.8601	1.61869e-05	0.00407639	up	2cWT-2cKO:8cKO-2cKO	NA	BC048679	-1.81399	4.07653	-1.81399	-1.81399	-1.81399	-1.81399	-1.81399	2.01562	-0.298064	2.43358	-0.773871	2.48239	-1.81399	-1.81399	-1.81399	-1.81399	-1.81399	-1.81399	-1.81399	-1.81399	-1.81399	-1.81399	-1.81399	-1.81399	-1.81399	-1.81399	-1.81399	-1.81399	-1.81399	-1.81399	0.181541	-1.81399	-1.81399	-0.129601	-1.81399	-1.81399	-1.81399
ENSMUSG00000093465	NA	ENSMUSG00000093465	NA	7.33238	0.157648	20.9968	2.26215e-05	0.00515057	up	2cWT-2cKO:8cKO-2cKO	NA	ENSMUSG00000093465	-1.81399	4.10368	-1.81399	-1.81399	-1.81399	-1.81399	2.9675	0.879633	-1.81399	-1.81399	-1.81399	-1.81399	0.975669	-1.81399	-1.81399	-1.81399	-1.81399	-1.81399	-1.81399	-1.81399	-1.81399	-1.81399	-1.81399	-1.81399	-1.81399	-1.81399	-1.81399	-1.81399	-1.81399	-1.81399	-1.81399	0.469389	0.341761	-1.81399	-1.81399	-1.81399	-1.81399
ENSMUSG00000050323	Ndufaf6	Ndufaf6	76947	7.48626	2.94162	26.4288	2.04791e-06	0.00136153	up	2cWT-2cKO:8cKO-2cKO	NA	Ndufaf6	-1.81399	2.37084	-1.81399	7.67531	-1.81399	4.43485	-1.05064	3.01112	3.63808	-1.81399	-1.81399	-1.00997	-0.824285	2.2851	-1.81399	0.935543	-0.567522	-1.81399	-1.09207	-1.81399	-1.81399	-1.02569	-1.81399	-1.81399	-1.81399	-1.81399	-1.81399	-1.81399	-0.352013	3.74008	1.35064	0.0765418	0.814552	1.11998	1.00825	-1.81399	-1.81399
ENSMUSG00000073103	Gm10466	Gm10466	100038617	7.51648	1.60203	20.1852	2.73853e-05	0.00591499	up	2cWT-2cKO:8cKO-2cKO	8cWT-8cKO:8cWT-2cWT	Gm10466	2.38901	3.59261	3.85495	0.109239	-1.81399	3.66527	-1.81399	-1.81399	-1.81399	-1.81399	-1.81399	-1.81399	-1.81399	-1.81399	-1.81399	-1.81399	-1.81399	-1.81399	-1.81399	-1.81399	-0.51573	-1.81399	-1.81399	-1.81399	-1.81399	-1.81399	-1.81399	-1.81399	-1.81399	-1.81399	-1.81399	-1.81399	-1.81399	-1.81399	-1.81399	5.91715	-1.81399
ENSMUSG00000092465	NA	ENSMUSG00000092465	NA	7.62183	1.34362	22.6221	1.20858e-05	0.00351459	up	2cWT-2cKO:8cKO-2cKO	NA	ENSMUSG00000092465	-1.81399	-1.81399	-0.655954	-1.81399	-1.81399	4.37594	-1.05064	-1.81399	-1.81399	-1.81399	0.571603	-1.81399	1.75204	-1.81399	-1.81399	-1.81399	-1.81399	-1.81399	-1.81399	-1.81399	-1.81399	-1.81399	-1.81399	-1.81399	-1.81399	-1.81399	-1.81399	-1.81399	-1.81399	-1.81399	3.82402	2.76024	5.12646	1.37475	-1.81399	-0.13463	-1.81399
ENSMUSG00000102493	NA	ENSMUSG00000102493	NA	7.67352	1.15481	21.983	1.1804e-05	0.00350348	up	2cWT-2cKO:8cKO-2cKO	NA	ENSMUSG00000102493	-1.81399	-1.81399	-1.12177	-1.81399	-1.81399	5.21737	-1.81399	-1.81399	-0.732722	-0.229281	-1.81399	-1.81399	-1.81399	1.63634	-1.81399	-1.81399	-1.81399	-1.81399	-1.40834	-1.81399	-1.81399	-1.81399	-1.81399	-1.47068	-1.81399	-1.81399	-1.81399	-1.81399	-1.81399	1.71627	-1.81399	-1.34221	-1.81399	4.22921	3.18336	-0.13463	-1.81399
ENSMUSG00000082953	NA	ENSMUSG00000082953	NA	7.82028	1.47536	23.0782	7.60356e-06	0.00267783	up	2cWT-2cKO:8cKO-2cKO	8cWT-2cWT	ENSMUSG00000082953	1.67729	-1.81399	-1.81399	6.37307	-1.81399	1.90519	-1.05064	-1.2722	-1.81399	-1.81399	-1.81399	-1.00997	-1.81399	-0.405205	-1.81399	-1.3727	-1.81399	-1.81399	-1.81399	-1.81399	-1.81399	-1.81399	-1.81399	-1.47068	-1.20569	-1.81399	-0.862777	-1.31136	-1.81399	-1.81399	-0.232999	0.349944	-1.81399	-1.81399	-1.81399	2.84316	-1.81399
ENSMUSG00000113340	Gm7695	Gm7695	665575	7.86184	1.7675	28.1441	1.06586e-06	0.000984204	up	2cWT-2cKO:8cKO-2cKO	NA	Gm7695	4.56043	-0.930165	4.56993	4.81164	-1.81399	-1.81399	-1.05064	3.01112	0.98332	1.6451	2.34809	-0.118941	1.97418	3.39543	-1.81399	-1.81399	-1.81399	-0.466615	-1.81399	-1.81399	-1.81399	-1.81399	-1.81399	-1.81399	-1.81399	-1.81399	-1.81399	-1.31136	-1.81399	1.402	-1.23101	1.43545	0.814552	-0.505962	-0.523652	0.620496	0.566096
ENSMUSG00000048185	NA	ENSMUSG00000048185	NA	8.02838	1.20491	23.4679	6.51084e-06	0.00263943	up	2cWT-2cKO:8cKO-2cKO	NA	ENSMUSG00000048185	-1.81399	-1.81399	5.33586	-1.81399	-1.81399	4.25039	-1.81399	-1.2722	3.35452	-1.81399	-0.773871	-1.35668	-0.824285	0.293787	-1.81399	-1.81399	-1.81399	-1.81399	-1.81399	-1.81399	-1.0235	-1.81399	-1.27372	-1.81399	-1.81399	-1.81399	-1.81399	-1.81399	-1.81399	-1.81399	0.0885315	-0.987281	-1.81399	-1.81399	1.41651	-1.81399	-1.81399
ENSMUSG00000112964	NA	ENSMUSG00000112964	NA	8.08941	0.691686	23.7154	7.98813e-06	0.00270961	up	2cWT-2cKO:8cKO-2cKO	NA	ENSMUSG00000112964	-1.81399	-1.81399	-1.81399	4.08438	-1.81399	3.66527	0.108105	-1.81399	-1.01165	-1.81399	-1.81399	3.94985	-1.81399	1.74163	-1.81399	-1.81399	-1.81399	-1.81399	-1.81399	-1.81399	-1.81399	-1.81399	-1.81399	-1.81399	-1.81399	-1.81399	-1.81399	-1.81399	-1.81399	-1.81399	1.35064	-0.987281	-1.81399	-1.81399	-1.44755	-1.81399	-1.81399
ENSMUSG00000109127	NA	ENSMUSG00000109127	NA	8.19395	0.520566	22.1653	1.43942e-05	0.00379756	up	2cWT-2cKO:8cKO-2cKO	NA	ENSMUSG00000109127	-1.81399	-1.81399	4.96725	-1.81399	-1.81399	-1.81399	-1.81399	-1.81399	-1.81399	-1.81399	-1.81399	-1.35668	0.753772	-1.81399	-1.81399	-1.81399	-1.81399	-1.81399	-1.81399	-1.81399	-1.81399	-1.81399	-1.81399	-1.81399	-1.81399	-1.81399	-1.81399	-1.81399	-1.81399	-1.81399	-1.81399	3.26835	-1.81399	-1.81399	-1.81399	-1.81399	-1.81399
ENSMUSG00000028936	Rpl22	Rpl22	19934	1.07771	8.44181	11.657	0.00102701	0.045506	up	2cWT-2cKO:8cWT-2cWT:8cKO-2cKO	NA	Rpl22	5.13361	6.63411	5.82909	8.16096	6.68068	6.28304	9.86441	9.44881	9.95994	9.85496	8.95947	9.35322	9.25282	9.81616	4.92471	4.73006	5.90481	5.74758	6.09855	4.45427	6.08609	5.51647	6.40775	4.7886	5.41935	3.59736	5.40026	6.65372	6.54865	9.59981	9.20433	9.56279	9.34534	8.90971	8.45685	9.46296	9.81914
ENSMUSG00000006333	Rps9	Rps9	76846	1.09195	8.01537	11.3443	0.00118847	0.0488092	up	2cWT-2cKO:8cWT-2cWT:8cKO-2cKO	NA	Rps9	5.64287	6.67655	6.34949	8.29834	5.87366	6.94434	9.29387	8.92555	9.40956	9.08423	8.91706	8.84022	9.10493	8.96125	4.34275	5.01069	5.03487	3.82723	5.48222	6.51644	5.6101	4.63751	6.37444	6.43161	5.94807	5.87242	6.65875	6.50349	6.03705	9.0013	8.78854	9.24241	9.21182	8.37923	8.89272	8.7547	8.05431
ENSMUSG00000047675	Rps8	Rps8	20116	1.12521	9.09004	12.669	0.000669366	0.0369619	up	2cWT-2cKO:8cWT-2cWT:8cKO-2cKO	NA	Rps8	7.34248	7.43837	8.09714	8.41035	9.16663	7.75317	9.93012	9.80923	9.79708	10.4788	10.2157	9.72511	9.42921	10.3685	5.47226	7.80709	6.00248	7.23091	5.69775	6.73173	8.3053	6.31998	6.35408	5.04716	8.32832	4.9084	7.31812	7.57304	7.14492	10.0455	10.1086	10.2881	9.64096	9.83299	9.62534	9.85428	10.4059
ENSMUSG00000061477	Rps7	Rps7	20115	1.18828	8.01477	11.9087	0.000913657	0.042777	up	2cWT-2cKO:8cWT-2cWT:8cKO-2cKO	NA	Rps7	6.28697	7.42161	6.99747	7.74106	2.82873	8.14733	8.88859	8.74207	9.57297	8.45359	8.33923	8.40418	8.25944	9.09486	6.01426	5.36433	6.54366	5.87902	6.10243	5.92841	6.65127	4.63751	5.30117	6.44938	6.57211	3.98385	5.10433	6.70707	6.3304	8.89356	9.26552	8.97547	8.9969	8.71881	8.76081	8.42461	9.78824
ENSMUSG00000031812	Map1lc3b	Map1lc3b	67443	1.19018	8.26492	15.5222	0.000179072	0.0172044	up	2cWT-2cKO:8cWT-2cWT:8cKO-2cKO	NA	Map1lc3b	7.43284	7.41823	6.10347	9.35305	7.18012	7.5704	9.10099	8.87825	9.16696	8.9127	8.60607	9.32725	8.10494	9.21371	5.78411	6.77044	5.38746	6.64591	5.55487	6.46237	6.69527	6.5443	6.76043	6.6047	7.13435	6.28979	7.75397	7.14307	6.85059	9.39408	9.09144	9.42042	8.34597	8.9322	8.766	9.51577	9.18683
ENSMUSG00000093674	Rpl41	Rpl41	67945	1.19318	9.39031	22.3162	1.03194e-05	0.00329077	up	2cWT-2cKO:8cWT-2cWT:8cKO-2cKO	NA	Rpl41	8.86845	9.06448	8.27651	9.64117	9.80122	9.1583	10.1606	10.2227	10.6013	9.5817	9.82356	10.0257	10.0226	10.9901	8.15532	6.82455	7.97098	6.97795	7.10623	8.07833	8.3213	6.98203	8.6942	8.59527	8.18484	7.50426	8.35886	8.2965	8.50496	9.86952	10.3522	10.3681	9.52642	10.2026	9.44099	9.30332	9.74264
ENSMUSG00000060938	Rpl26	Rpl26	19941	1.21682	8.11225	16.3124	0.000126814	0.0147624	up	2cWT-2cKO:8cWT-2cWT:8cKO-2cKO	NA	Rpl26	6.39831	6.2189	6.84099	7.77284	6.96071	7.56821	9.08158	8.942	9.60566	9.16648	8.82353	8.63727	9.08049	9.60958	6.26829	5.03328	5.4338	4.8498	5.57457	5.40817	6.43649	4.10767	6.91669	4.86624	5.65966	6.59341	5.68717	6.29062	6.0407	8.58351	9.01709	8.99178	9.30668	8.32455	8.37773	8.96102	9.6576
ENSMUSG00000039041	Adrm1	Adrm1	56436	1.28813	7.95529	17.0854	9.08062e-05	0.0126831	up	2cWT-2cKO:8cWT-2cWT:8cKO-2cKO	NA	Adrm1	7.56081	7.54373	7.14401	8.1121	6.95191	8.14733	9.20356	8.62047	8.82321	9.17502	9.22005	8.18875	9.14478	8.72811	4.45062	6.55159	5.1464	6.10758	5.58015	5.74128	5.65832	6.30119	6.00524	6.45567	7.53325	5.22247	7.06135	7.0622	7.12098	8.46859	8.67741	8.03526	8.67656	8.43366	8.08139	9.12378	7.96044
ENSMUSG00000061787	Rps17	Rps17	20068	1.29924	8.43081	19.8001	2.88574e-05	0.00599464	up	2cWT-2cKO:8cWT-2cWT:8cKO-2cKO	NA	Rps17	6.58285	7.36031	7.9929	8.27263	6.39915	7.66365	9.33122	9.50007	9.41381	9.62286	9.90086	9.30662	8.98154	9.50177	6.06436	6.30653	5.35343	5.22785	5.17075	6.17022	7.17709	5.97108	5.68853	5.24906	6.72843	5.58773	7.27426	5.39672	7.2369	9.2981	9.30805	9.52494	9.38883	8.53755	8.99881	9.53539	9.15993
ENSMUSG00000030744	Rps3	Rps3	27050	1.40542	8.88391	13.529	0.000583215	0.0343085	up	2cWT-2cKO:8cWT-2cWT:8cKO-2cKO	NA	Rps3	6.79646	7.36452	7.64334	7.43823	5.22558	7.50089	10.2018	9.8954	10.2037	10.2648	10.1803	9.98593	9.32711	10.379	4.93217	4.73558	2.31291	6.68954	4.21475	6.22646	6.74636	6.41743	6.34264	5.28343	5.74639	2.89832	6.38397	3.06091	6.6187	10.0168	9.80599	10.2167	9.46203	9.57918	9.89104	9.17784	9.93825
ENSMUSG00000043207	Zmpste24	Zmpste24	230709	1.46139	8.44067	27.1662	1.54434e-06	0.00122231	up	2cWT-2cKO:8cWT-2cWT:8cKO-2cKO	NA	Zmpste24	7.55299	7.76714	7.61139	7.65839	7.18012	7.40348	9.09263	9.19937	9.46589	8.82678	9.65638	9.74701	9.3151	9.2813	6.06096	5.37498	4.27892	6.76916	5.61862	5.65713	5.52162	5.78884	6.02255	4.82794	6.64917	5.78825	6.93244	6.89697	6.48576	9.36951	9.80153	9.95442	9.3289	9.29528	9.67684	8.0751	9.21614
ENSMUSG00000060036	Rpl3	Rpl3	27367	1.56804	8.69395	23.1331	7.43898e-06	0.00267783	up	2cWT-2cKO:8cWT-2cWT:8cKO-2cKO	NA	Rpl3	4.42021	6.42937	5.17033	6.71598	7.15733	6.05796	9.84618	9.89834	9.90513	9.90545	9.85245	9.825	9.71465	10.1073	5.11379	3.19184	4.68137	5.17035	3.17901	3.20299	2.45216	5.51647	4.63403	4.32175	6.3288	3.04481	4.90142	4.21251	4.94151	10.2396	9.70422	9.6631	9.12369	9.60313	9.55453	9.69766	10.1535
ENSMUSG00000074365	Crxos	Crxos	546024	1.56892	7.48514	16.2991	0.000127546	0.0147624	up	2cWT-2cKO:8cWT-2cWT:8cKO-2cKO	NA	Crxos	6.17215	5.16764	6.34639	8.26892	7.71556	6.8573	8.09076	8.73243	9.1222	8.30327	8.29023	8.05647	8.65821	8.55249	4.48147	5.35	5.485	6.22519	5.56616	1.8006	4.3805	6.27446	4.88172	6.67218	5.68915	2.48449	6.71816	5.22446	4.98763	7.69616	8.06689	8.62533	7.63182	7.63397	8.40003	8.42986	7.85258
ENSMUSG00000070319	Eif3g	Eif3g	53356	1.59655	8.05215	19.9166	2.74966e-05	0.00591499	up	2cWT-2cKO:8cWT-2cWT:8cKO-2cKO	NA	Eif3g	6.99242	6.93173	6.66295	8.37627	6.93414	6.82096	8.87707	9.22428	9.1712	9.37484	9.06278	8.68936	9.07225	9.13165	4.03144	5.41682	0.0910507	5.30468	4.60248	4.81514	6.72953	5.35092	5.56405	4.9435	6.81507	5.51836	5.36351	6.60536	6.44502	9.00009	9.14998	9.03175	9.28297	8.44761	8.20796	8.77753	8.89583
ENSMUSG00000030096	Slc6a6	Slc6a6	21366	1.60354	7.55879	23.4706	6.50399e-06	0.00263943	up	2cWT-2cKO:8cWT-2cWT:8cKO-2cKO	NA	Slc6a6	6.69867	7.04374	6.57027	7.88373	7.26786	6.58562	8.76379	8.42539	8.53143	8.05445	8.1599	8.80815	8.45423	7.84769	3.87759	5.4271	5.23131	6.14984	4.62425	3.92469	6.45025	6.18299	4.08319	5.68373	6.69559	4.72497	5.45367	5.013	5.07567	8.23909	8.43361	8.42009	8.84483	7.77889	8.7501	8.40074	8.30949
ENSMUSG00000033047	Eif3l	Eif3l	223691	1.74778	7.13551	14.618	0.000283893	0.023201	up	2cWT-2cKO:8cWT-2cWT:8cKO-2cKO	NA	Eif3l	3.94828	4.71408	6.2534	5.78367	4.26522	7.0328	8.80212	8.38176	8.91492	7.85274	8.18692	8.65863	8.44265	8.61054	-0.128904	2.2204	1.16109	2.47391	4.36454	3.21612	4.21303	1.23397	4.82367	3.58193	5.34188	4.18684	4.76016	4.11719	5.17866	8.56484	8.30256	8.16644	7.25857	7.7967	7.51459	5.35779	6.97586
ENSMUSG00000028234	Rps20	Rps20	67427	1.76626	7.00656	14.2652	0.000320874	0.0240236	up	2cWT-2cKO:8cWT-2cWT:8cKO-2cKO	NA	Rps20	5.29221	5.49178	5.12761	6.18114	0.847977	7.14877	7.50287	8.27231	8.63833	7.83489	7.14151	7.90061	8.23414	8.32681	3.93072	4.82116	4.27892	3.67016	-0.422539	2.19476	4.35146	3.68902	4.6265	2.79324	4.23112	0.429532	4.40994	2.6071	5.82056	7.98572	8.32439	8.50118	8.07992	8.10567	8.08314	7.29954	7.1439
ENSMUSG00000002102	Psmc3	Psmc3	19182	1.80911	6.38599	12.5103	0.000692159	0.037596	up	2cWT-2cKO:8cWT-2cWT:8cKO-2cKO	NA	Psmc3	3.79014	5.36287	6.19598	3.04036	7.83528	5.38607	8.08866	7.07367	7.70958	8.3162	7.57565	7.81008	6.30497	7.73904	3.45897	3.22362	3.78159	3.51251	5.40886	5.08221	4.93461	1.66867	1.23354	3.97441	1.64081	1.48933	5.61866	5.30885	4.55919	6.68016	6.17584	6.5241	5.809	6.38926	6.90326	7.07662	6.52958
ENSMUSG00000062081	NA	ENSMUSG00000062081	NA	1.83184	7.89179	27.8711	1.18165e-06	0.0010337	up	2cWT-2cKO:8cWT-2cWT:8cKO-2cKO	NA	ENSMUSG00000062081	6.21805	6.83278	6.27966	8.03992	6.6913	7.89627	8.78341	9.01755	8.96433	8.34928	8.70286	8.38463	8.55122	8.68379	5.86822	5.69706	3.87091	5.58107	1.81408	3.94848	5.794	4.84895	5.59523	4.9182	6.599	3.23994	5.59509	4.90869	6.22204	9.09703	8.73967	9.41671	9.26868	8.67206	8.26654	8.97904	8.92453
ENSMUSG00000057863	Rpl36	Rpl36	54217	1.84582	6.88887	13.4657	0.00048242	0.0308396	up	2cWT-2cKO:8cWT-2cWT:8cKO-2cKO	NA	Rpl36	3.77486	4.37838	6.84978	6.89993	1.72925	5.51906	8.35214	8.16238	8.61399	7.38775	8.27631	8.00497	7.85012	8.33629	3.35175	2.69865	3.96407	2.08329	2.73465	3.42278	2.39639	3.82152	6.26236	3.4966	4.13641	0.689205	4.97634	3.1599	1.55885	7.91443	8.2121	7.82107	6.08968	7.81025	7.12941	8.34346	4.79675
ENSMUSG00000073702	Rpl31	Rpl31	114641	1.95572	6.29432	15.6328	0.000170586	0.0168769	up	2cWT-2cKO:8cWT-2cWT:8cKO-2cKO	NA	Rpl31	5.63443	5.27005	4.20926	6.92844	0.847977	4.961	7.36038	7.29701	7.87409	7.74978	6.37863	7.47285	6.20982	8.0712	2.2312	4.40923	3.86126	3.92782	1.21158	3.95633	2.14885	4.36094	3.65046	3.55404	2.33841	3.67441	1.00726	2.54984	4.49678	5.85152	7.65376	7.60819	7.24227	7.53621	7.30549	5.56291	6.63751
ENSMUSG00000031833	Mast3	Mast3	546071	1.98798	6.2206	11.3468	0.00118707	0.0488092	up	2cWT-2cKO:8cWT-2cWT:8cKO-2cKO	NA	Mast3	4.63846	4.36722	2.51433	7.17831	0.0596176	2.59766	6.8595	7.78305	7.3307	5.85097	8.1523	7.10934	7.02026	7.92028	4.20167	1.50003	3.94591	4.68713	2.26578	2.72218	4.61847	0.792283	3.84459	1.32206	1.77261	1.73932	2.13734	0.155968	-0.696359	7.73443	7.48041	7.40687	7.43692	6.78213	7.20774	5.54366	5.22357
ENSMUSG00000059291	Rpl11	Rpl11	67025	2.00226	6.56317	23.1746	7.31676e-06	0.00267783	up	2cWT-2cKO:8cWT-2cWT:8cKO-2cKO	NA	Rpl11	4.12732	5.00435	4.11033	6.61438	7.05416	7.1864	7.49337	7.56338	7.80548	7.25441	8.24523	7.25371	6.8693	7.66736	4.23222	5.20231	3.77132	4.02184	4.41537	4.85346	4.24496	2.39148	4.15818	4.31623	3.42297	2.70619	3.8568	4.89151	4.27918	7.46012	6.99625	7.67106	7.25393	6.83082	6.95295	7.15482	7.75211
ENSMUSG00000062908	Acadm	Acadm	11364	2.04509	6.92543	19.8249	2.85629e-05	0.00599464	up	2cWT-2cKO:8cWT-2cWT:8cKO-2cKO	NA	Acadm	3.77486	3.92494	6.72874	6.75893	7.68931	5.50995	7.517	7.33109	7.58157	8.81772	7.62918	8.2856	7.74469	7.70852	4.68513	4.67939	4.257	5.43246	3.76358	3.78188	1.23853	-0.144454	3.09635	5.10915	4.03505	5.67656	4.18626	4.07722	3.51484	7.95862	7.22035	7.80483	8.18598	7.36309	7.81726	8.80406	4.97192
ENSMUSG00000061032	Rrp1	Rrp1	18114	2.13323	7.41287	29.6167	6.14216e-07	0.000680593	up	2cWT-2cKO:8cWT-2cWT:8cKO-2cKO	NA	Rrp1	6.56963	5.23057	4.1393	8.16496	7.40319	7.32001	8.22974	8.6071	8.66752	9.21008	8.26085	7.88515	9.00692	8.42244	4.42968	5.01524	5.08135	3.20413	2.39803	1.53322	5.65238	5.47683	5.5362	3.5911	5.25439	5.50998	4.14355	5.33874	5.26857	8.59074	8.41816	8.26053	7.94113	7.94415	7.40825	7.51745	7.04282
ENSMUSG00000016554	Eif3d	Eif3d	55944	2.20614	7.63031	24.3368	7.73333e-06	0.00267783	up	2cWT-2cKO:8cWT-2cWT:8cKO-2cKO	NA	Eif3d	4.9486	5.39345	7.03841	5.67572	6.09772	8.25204	8.83069	9.0045	8.69135	8.71604	9.0853	8.56637	8.49067	8.8936	3.16166	3.46875	4.07683	6.47121	2.99073	4.78462	2.6076	2.144	4.7214	4.60602	1.05262	4.44611	4.62699	2.49021	6.08025	8.65277	8.91751	8.09742	8.85329	7.90552	8.30269	7.05639	8.92808
ENSMUSG00000029103	Lrpap1	Lrpap1	16976	2.33848	7.68872	18.2518	0.000117237	0.0143279	up	2cWT-2cKO:8cWT-2cWT:8cKO-2cKO	NA	Lrpap1	5.3029	2.84312	4.48222	4.72764	7.74133	6.08886	9.02502	9.54932	9.29347	9.17076	9.31973	9.30153	8.95977	9.09548	2.27881	4.38132	0.72308	3.03404	-0.613147	2.62708	0.156363	4.17527	3.05209	3.1568	4.91958	2.18078	4.76721	5.2014	3.47222	8.09382	8.15805	8.59487	7.78594	8.34145	8.90589	5.6733	8.00814
ENSMUSG00000097971	NA	ENSMUSG00000097971	NA	2.54311	15.1416	32.3117	2.33768e-06	0.00137929	up	2cWT-2cKO:8cWT-2cWT:8cKO-2cKO	NA	ENSMUSG00000097971	9.09559	11.9056	10.7297	12.2312	9.79754	12.3704	15.5492	16.2705	16.3875	15.736	16.5614	17.2056	16.506	16.2667	7.03727	7.9851	7.73892	8.21184	7.02161	7.11576	10.4854	8.46537	8.1731	7.59348	10.2187	8.38603	9.49084	8.31219	10.3799	16.5066	15.9733	17.0677	15.9819	15.8607	16.5235	16.0813	15.4038
ENSMUSG00000026959	Grin1	Grin1	14810	2.6852	6.55264	14.036	0.000533091	0.0334359	up	2cWT-2cKO:8cWT-2cWT:8cKO-2cKO	NA	Grin1	-0.796383	3.34207	0.753101	3.29506	6.17541	3.25008	8.63727	8.25711	7.17677	8.40601	8.30675	6.77815	7.97272	8.10242	-0.560154	3.5462	-0.200979	-0.466615	-1.81399	-0.897071	0.402713	2.44724	3.40865	-1.47068	2.29522	0.429532	1.4189	-0.189198	-0.696359	7.52201	7.48213	7.6796	6.71036	6.90345	7.15127	7.18619	6.73793
ENSMUSG00000025264	Tsr2	Tsr2	69499	2.79154	6.44158	12.9409	0.000879665	0.0423646	up	2cWT-2cKO:8cWT-2cWT:8cKO-2cKO	NA	Tsr2	2.89208	4.20117	5.0227	1.41531	1.35488	6.25062	8.18914	7.38019	7.7154	7.33283	8.91077	8.19868	6.99828	7.58044	1.40456	-0.761965	-1.38837	-0.200781	-1.40834	-0.897071	1.84987	4.14187	-1.27372	0.264591	2.60918	-0.550463	0.112196	-1.31136	4.22886	6.80987	7.94119	7.56693	6.96991	6.45631	7.58426	3.87715	7.01641
ENSMUSG00000084128	Esrp2	Esrp2	77411	2.8415	6.61177	17.5365	0.000130196	0.014924	up	2cWT-2cKO:8cWT-2cWT:8cKO-2cKO	NA	Esrp2	-1.21727	2.85914	-0.0219397	5.35019	0.847977	5.5281	7.37769	8.14729	7.74344	8.088	7.67232	7.68106	8.10641	6.97422	2.78674	-0.532292	0.63516	0.541768	-1.09207	-0.686947	0.156363	-0.144454	-0.104157	2.45421	3.0073	0.112631	2.00045	1.53219	-0.696359	7.76603	7.9569	9.10966	7.94113	7.25821	8.02329	5.6733	3.11389
ENSMUSG00000005836	Gata6	Gata6	14465	2.94706	6.38438	13.6934	0.000644156	0.0360074	up	2cWT-2cKO:8cWT-2cWT:8cKO-2cKO	NA	Gata6	-1.21727	4.62787	-0.304395	3.40732	0.0596176	-1.81399	8.11367	7.66455	7.76535	7.5143	8.37623	8.64532	8.4298	8.8245	-0.941477	-1.03526	-1.38837	-0.792753	-0.613147	-1.81399	-0.140895	-0.518807	0.0834343	2.87064	-1.81399	-0.862492	-0.550807	-0.643817	-1.14955	7.34498	7.17016	4.39002	5.50772	5.98305	5.84196	1.11364	7.02968
ENSMUSG00000061517	Sox21	Sox21	223227	3.14126	5.19781	13.0089	0.000550994	0.033812	up	2cWT-2cKO:8cWT-2cWT:8cKO-2cKO	NA	Sox21	2.50464	-1.81399	-1.81399	0.905285	1.35488	-1.81399	3.65332	4.38507	3.53651	-1.81399	7.5365	5.05173	4.16567	6.04331	-1.46129	-1.03526	-1.81399	-0.792753	-1.81399	-1.1431	-1.81399	-1.81399	-1.81399	-1.81399	-0.779127	-0.862492	-1.81399	-0.189198	-0.352013	5.13873	6.7404	6.3867	8.1046	7.46258	7.64301	3.74856	6.67177
ENSMUSG00000037335	Hand1	Hand1	15110	3.32192	7.11121	15.8141	0.00035101	0.0255884	up	2cWT-2cKO:8cWT-2cWT:8cKO-2cKO	NA	Hand1	6.21805	1.42672	-0.0219397	-1.81399	4.70316	-0.215469	6.14363	8.28075	7.75196	8.74883	8.70286	7.24566	8.97271	7.15305	-0.941477	-0.33421	-0.567522	-1.81399	-0.832828	-0.686947	-0.51573	-0.518807	-0.57353	3.37437	0.237992	1.18675	-0.294451	-0.189198	3.15951	8.72032	8.94243	6.54295	7.67583	9.61862	6.91707	6.92123	8.96997
ENSMUSG00000000308	Ckmt1	Ckmt1	12716	3.37208	5.75311	17.5586	0.000101726	0.013406	up	2cWT-2cKO:8cWT-2cWT:8cKO-2cKO	NA	Ckmt1	-1.81399	-1.81399	4.91795	1.41531	0.0596176	-1.81399	6.11913	6.9864	4.24055	6.59077	6.90883	5.74526	7.16538	7.37691	-1.46129	-0.761965	1.76866	-1.21483	-1.09207	-1.43989	-0.140895	-1.81399	-1.81399	-0.76113	-1.81399	0.279765	-1.26137	1.125	-1.81399	7.70212	8.22888	7.09718	4.7973	7.51815	6.21372	6.8525	6.75401
ENSMUSG00000094499	NA	ENSMUSG00000094499	NA	3.57074	3.55509	12.5322	0.000685244	0.0373424	up	2cWT-2cKO:8cWT-2cWT:8cKO-2cKO	NA	ENSMUSG00000094499	-0.796383	-0.386104	-0.0219397	0.109239	-1.81399	-1.81399	5.05358	2.81248	3.29356	2.57796	5.07183	5.54021	2.41437	3.83678	-1.81399	-1.3727	-1.81399	-1.81399	-1.81399	-1.81399	-1.81399	-1.81399	-1.81399	-1.81399	-1.81399	-1.26118	-1.81399	-1.81399	-1.81399	5.63209	5.94826	5.53883	3.22901	5.54445	5.26778	2.71136	3.46589
ENSMUSG00000057503	Olfr1459	Olfr1459	258684	3.8653	5.44458	29.0866	7.48283e-07	0.000777326	up	2cWT-2cKO:8cWT-2cWT:8cKO-2cKO	NA	Olfr1459	-0.47096	3.59261	0.214167	0.109239	-1.81399	3.72942	3.40582	4.7542	4.29599	5.12815	1.95966	7.68031	3.68936	4.58125	-1.46129	-0.00470468	-0.372641	-1.81399	-1.40834	-0.686947	-1.0235	0.152501	-1.81399	-0.76113	-0.450327	-0.0764337	-1.81399	-0.939318	-1.14955	7.2425	7.66739	7.95053	6.65866	7.65515	7.5549	6.95805	4.18793
ENSMUSG00000037411	Serpine1	Serpine1	18787	3.99731	2.56141	12.0896	0.000840249	0.041197	up	2cWT-2cKO:8cWT-2cWT:8cKO-2cKO	NA	Serpine1	-0.796383	-0.111763	-1.81399	-1.81399	-1.81399	0.524193	-0.185311	4.55381	-1.81399	5.19686	4.81893	-1.81399	2.921	1.52275	-1.81399	-1.81399	-1.81399	-1.81399	-1.81399	-1.43989	-1.81399	-1.81399	-1.81399	-1.81399	-1.81399	-1.81399	-1.81399	-1.81399	-1.81399	4.7129	3.96806	3.34844	2.44483	3.34332	0.521833	5.40122	-1.81399
ENSMUSG00000032436	Cmtm7	Cmtm7	102545	4.59349	3.82041	17.4501	7.76615e-05	0.0117482	up	2cWT-2cKO:8cWT-2cWT:8cKO-2cKO	NA	Cmtm7	-1.21727	3.7121	-1.81399	-1.81399	3.1077	0.201254	4.18079	5.55702	4.91249	7.48255	-1.81399	5.12811	2.81003	6.31259	-1.81399	-1.81399	-1.81399	0.680031	-1.40834	-1.43989	-1.81399	-1.02569	-1.81399	-1.19357	-1.81399	-1.81399	-1.26137	-1.31136	-1.81399	5.25668	4.20805	3.46801	2.37821	4.21297	1.83756	1.11364	-1.81399
ENSMUSG00000074277	Phldb3	Phldb3	232970	4.76441	7.46275	35.9498	9.09407e-07	0.000889133	up	2cWT-2cKO:8cWT-2cWT:8cKO-2cKO	NA	Phldb3	3.17409	4.31009	1.25454	6.56683	7.98949	4.25039	9.22763	8.88697	9.13746	8.96453	9.14164	9.1891	8.2515	8.48775	-0.941477	0.380766	-0.567522	0.0236083	-1.09207	-0.686947	0.402713	4.25556	1.45365	-0.0408644	-1.81399	0.429532	1.4189	2.99808	-1.81399	8.7508	7.9866	8.46884	8.38891	8.1649	7.64835	6.08633	7.71152
ENSMUSG00000069324	Gm5096	Gm5096	329008	4.93024	5.44502	45.3001	2.76914e-09	9.20518e-06	up	2cWT-2cKO:8cWT-2cWT:8cKO-2cKO	NA	Gm5096	4.42021	1.70012	4.26289	0.109239	0.847977	-1.81399	6.97773	6.98492	7.23264	6.52102	7.68501	5.86037	5.49639	7.31641	-1.81399	-1.3727	-1.06013	-0.200781	-1.81399	-1.81399	0.156363	0.398643	-1.27372	-0.961208	-1.20569	-1.81399	-0.862777	-0.643817	-1.81399	5.82448	6.8347	7.06198	2.98219	5.94423	6.88531	4.20578	6.37184
ENSMUSG00000032494	Tdgf1	Tdgf1	21667	5.0868	4.96935	26.7429	1.81544e-06	0.00131193	up	2cWT-2cKO:8cWT-2cWT:8cKO-2cKO	NA	Tdgf1	-1.81399	-1.81399	-1.12177	4.92913	-1.81399	-1.81399	6.90796	6.17704	6.04624	6.62442	7.26219	-0.730648	3.16599	5.71197	-1.81399	-1.3727	-1.38837	0.0236083	-1.81399	-1.81399	-1.0235	-1.81399	-0.881557	-1.81399	-1.81399	-1.81399	-0.862777	-1.31136	-1.14955	3.07574	6.13863	6.45884	7.37846	6.89584	3.67638	6.27322	2.6473
ENSMUSG00000028029	Aimp1	Aimp1	13722	5.50603	5.07322	39.3088	1.98662e-08	4.12746e-05	up	2cWT-2cKO:8cWT-2cWT:8cKO-2cKO	NA	Aimp1	-1.21727	-1.45587	6.08125	1.41531	-1.81399	-0.803809	6.98227	7.18195	6.45567	6.11044	7.40458	4.92144	6.5748	6.43538	-1.81399	-0.761965	-0.0475875	0.922208	-1.81399	-0.897071	-1.81399	-1.81399	-1.81399	-1.81399	-1.20569	-0.550463	-0.862777	-1.81399	-1.81399	5.49479	6.17159	6.18769	4.4854	5.25834	4.33534	5.33558	5.47704
ENSMUSG00000020925	Ccdc43	Ccdc43	52715	7.05895	5.54483	70.2461	1.9886e-12	3.30525e-08	up	2cWT-2cKO:8cWT-2cWT:8cKO-2cKO	NA	Ccdc43	1.61003	-1.81399	-0.655954	0.109239	-1.81399	6.33551	7.03122	6.11094	6.40434	9.27375	7.19869	6.42795	5.55779	6.63477	-1.46129	-1.81399	-1.81399	-1.21483	-1.81399	-1.81399	-1.0235	-1.81399	-1.81399	-1.19357	-1.20569	-1.81399	-1.26137	-0.643817	-1.14955	6.27945	5.66591	5.04736	5.1861	6.38201	5.42241	3.67969	4.09
ENSMUSG00000073243	Gm9	Gm9	194854	4.53804	3.74039	12.1293	0.000929862	0.042777	up	2cWT-2cKO:8cWT-8cKO	8cWT-2cWT:8cKO-2cKO	Gm9	5.47345	5.47629	7.10783	7.50283	3.44538	2.01221	-1.05064	3.05679	-1.35775	0.507634	-1.81399	-1.35668	-1.81399	3.41147	-1.81399	-1.81399	-0.792902	-1.81399	4.48246	-1.81399	-1.81399	3.35184	-1.81399	-0.961208	-1.20569	-1.81399	-1.81399	-1.81399	3.67373	-1.81399	-1.81399	-1.81399	-1.81399	-1.81399	-1.81399	-1.81399	-1.81399
ENSMUSG00000019487	Trip10	Trip10	106628	4.55679	2.89237	12.9003	0.000578982	0.0342465	up	2cWT-2cKO:8cWT-8cKO	NA	Trip10	-1.81399	3.31909	-1.81399	-1.81399	-1.81399	2.52722	-1.81399	4.70486	5.59115	1.6451	5.78044	5.60138	5.27402	4.6839	-1.81399	-1.81399	-1.81399	-1.81399	-1.81399	-1.81399	-1.0235	-1.81399	-1.81399	-1.19357	-1.81399	-1.26118	0.279313	-1.81399	-1.81399	-0.487658	1.22517	-1.81399	-1.81399	-0.505962	-1.81399	-0.13463	-1.81399
ENSMUSG00000036533	Cdc42ep3	Cdc42ep3	260409	7.18414	2.89221	24.697	4.00948e-06	0.00196004	up	2cWT-2cKO:8cWT-8cKO	NA	Cdc42ep3	3.83501	-1.81399	-1.81399	7.42495	0.847977	4.06393	-1.05064	0.774235	0.03551	-1.81399	5.74046	2.94669	-1.81399	-1.81399	-1.46129	-1.81399	-1.38837	-1.81399	-1.40834	0.976891	-1.81399	-1.81399	-1.81399	0.353552	-1.81399	-1.81399	-1.26137	-1.81399	-1.81399	-1.81399	-1.81399	-1.34221	-1.81399	-1.81399	-1.81399	-1.81399	-1.81399
ENSMUSG00000021255	Esrrb	Esrrb	26380	1.41681	7.17199	11.2604	0.00123609	0.049746	up	2cWT-2cKO:8cWT-8cKO:8cWT-2cWT:8cKO-2cKO	NA	Esrrb	6.90567	6.34229	6.92448	7.52788	7.33033	6.47302	7.72201	8.24298	9.00945	8.26645	8.26649	9.19929	8.50966	8.22834	5.05347	6.52792	5.13443	6.25592	4.27791	3.16286	4.7688	4.94892	6.05934	3.04103	7.0508	4.10013	5.44491	6.19582	5.50362	7.45131	7.2448	7.44471	7.5068	7.43485	6.53869	3.27529	3.61418
ensembl_id	Symbol	Uniq_syms	entrez	logFC	logCPM	F	PValue	FDR	expression	FOUR_WAY_UP_COMP	FOUR_WAY_DOWN_COMP	Uniq_syms	TZSC118	TZSC119	TZSC120	TZSC121	TZSC122	TZSC123	TZSC125	TZSC126	TZSC127	TZSC128	TZSC129	TZSC130	TZSC131	TZSC132	TZSC94	TZSC95	TZSC96	TZSC97	TZSC98	TZSC99	TZSC100	TZSC101	TZSC102	TZSC103	TZSC104	TZSC105	TZSC106	TZSC107	TZSC108	TZSC109	TZSC110	TZSC111	TZSC112	TZSC113	TZSC114	TZSC115	TZSC116
ENSMUSG00000044938	Klhl31	Klhl31	244923	-9.21131	2.50801	12.9091	0.000597607	0.0345308	down	8cWT-2cWT	2cWT-2cKO	Klhl31	-1.81399	-1.81399	-1.81399	-1.81399	-1.81399	-1.81399	-1.81399	-1.81399	3.78923	-1.81399	-1.81399	-1.35668	-1.81399	3.03017	5.32978	3.55871	-1.81399	3.82723	-1.81399	3.35317	0.613069	-1.81399	4.52492	4.48817	-1.81399	4.62757	-1.26137	3.19767	1.6381	-1.81399	-1.81399	2.78348	-0.915587	2.93181	2.13634	-0.13463	-1.81399
ENSMUSG00000031757	Mt4	Mt4	17752	-9.05187	2.66012	11.7172	0.00102944	0.045506	down	8cWT-2cWT	2cWT-2cKO	Mt4	-1.81399	-1.81399	-1.81399	-1.81399	-1.81399	-1.81399	4.49184	-1.81399	-1.81399	4.66137	1.2555	-1.81399	-1.81399	4.43978	-0.941477	-0.761965	0.217527	-1.21483	5.89422	4.51397	4.59389	-1.81399	-1.81399	-0.76113	-1.81399	1.68077	4.93937	-0.939318	-1.14955	1.89322	-1.49325	-1.81399	-1.81399	2.89157	-1.81399	-1.81399	-1.81399
ENSMUSG00000028780	Sema3c	Sema3c	20348	-8.9896	2.185	11.5782	0.00109762	0.0470566	down	8cWT-2cWT	2cWT-2cKO	Sema3c	-1.81399	-1.81399	-1.81399	-1.81399	-1.81399	-1.81399	-1.81399	3.165	-1.81399	-1.81399	-1.81399	-1.81399	-1.81399	-1.81399	-0.941477	3.82009	4.58493	3.13368	3.57524	4.37454	-1.81399	-1.81399	4.97356	-0.76113	-0.182729	4.60413	-0.294451	-0.939318	-1.81399	-1.00349	-1.23101	-1.81399	-1.81399	3.28238	-1.81399	1.48047	-1.81399
ENSMUSG00000109771	Gm35315	Gm35315	102638847	-8.98105	2.23282	12.7311	0.000647748	0.0360074	down	8cWT-2cWT	2cWT-2cKO	Gm35315	-1.81399	-1.81399	-1.81399	-1.81399	-1.81399	-1.81399	-1.05064	-1.81399	-1.01165	-1.81399	-1.81399	4.26844	-1.81399	1.33362	0.55177	-1.81399	2.83105	3.45589	5.14838	2.11289	-1.81399	-1.02569	0.973692	2.1157	2.71128	5.95194	-0.294451	-1.81399	1.29108	0.191513	-1.00919	1.54828	-1.81399	1.11998	-1.44755	-1.81399	-1.81399
ENSMUSG00000047656	Trpt1	Trpt1	107328	-8.87136	2.61303	11.412	0.00118537	0.0488092	down	8cWT-2cWT	2cWT-2cKO	Trpt1	-1.81399	-1.81399	-1.81399	-1.81399	-1.81399	-1.81399	3.82467	0.253119	-1.81399	3.31492	5.62224	-1.81399	-1.81399	-1.31443	-1.81399	-0.761965	-1.81399	2.89897	3.75373	1.65393	6.16748	2.65095	-0.881557	2.69453	-0.779127	0.279765	-1.81399	-1.81399	4.02283	-1.81399	-1.81399	-1.34221	-1.81399	1.68836	3.85918	-1.81399	-1.81399
ENSMUSG00000025246	Tbl1x	Tbl1x	21372	-8.65602	2.25305	12.6213	0.000680813	0.037223	down	8cWT-2cWT	2cWT-2cKO	Tbl1x	-1.81399	-1.81399	-1.81399	-1.81399	-1.81399	-1.81399	-1.81399	2.73032	-1.81399	-1.81399	1.06147	2.36847	-1.81399	0.148183	-1.46129	2.28207	0.63516	4.35686	5.04726	-1.1431	-1.0235	2.144	1.52014	0.0682993	3.25281	-1.26118	-1.81399	0.86821	4.90192	0.999652	4.37489	4.10654	1.17005	-1.81399	1.22677	-1.81399	-1.81399
ENSMUSG00000034793	G6pc3	G6pc3	68401	-7.81391	3.1493	11.4906	0.00114298	0.0479735	down	8cWT-2cWT	2cWT-2cKO	G6pc3	-1.81399	-1.81399	-1.81399	-1.81399	-1.81399	-1.81399	5.70743	3.83632	3.29356	-0.229281	-1.81399	4.62539	5.46926	-1.81399	4.00337	4.44337	-1.81399	0.680031	-1.81399	1.15107	-1.81399	3.59341	-1.81399	-0.961208	-0.182729	-1.81399	-1.26137	-1.81399	2.75969	4.62789	3.94171	4.47098	3.37283	4.65888	4.03594	-1.81399	-1.81399
ENSMUSG00000092060	Bend4	Bend4	666938	-7.69445	3.54896	11.8355	0.000945215	0.0430947	down	8cWT-2cWT	2cWT-2cKO	Bend4	-1.81399	-1.45587	-1.81399	-1.81399	-1.81399	-1.81399	5.56358	0.0869953	2.45102	-1.81399	4.86428	5.15842	0.491429	5.07493	-1.46129	-1.81399	4.20451	1.31074	-1.81399	0.37261	-1.0235	-1.81399	4.46711	-1.81399	1.5701	0.112631	-1.81399	6.38367	-1.81399	5.63209	1.73515	5.21484	2.88956	5.43671	-1.81399	-1.81399	-1.81399
ENSMUSG00000025169	Ogfod3	Ogfod3	66179	-7.68194	2.65383	11.5196	0.00112776	0.047575	down	8cWT-2cWT	2cWT-2cKO	Ogfod3	-1.81399	-1.81399	-1.81399	-1.81399	-1.81399	-1.81399	4.55407	5.07586	3.74439	2.8295	3.81811	2.638	0.491429	1.19219	-0.401644	-1.81399	2.72856	2.89897	4.57479	-1.43989	-1.0235	2.50093	-1.81399	-1.81399	-0.779127	-1.81399	3.44678	-1.81399	-0.696359	-1.00349	3.96152	4.48522	-1.81399	0.415619	4.46992	2.5663	0.566096
ENSMUSG00000062444	Ap3b2	Ap3b2	11775	-7.61518	3.10228	13.5067	0.000439546	0.0290898	down	8cWT-2cWT	2cWT-2cKO	Ap3b2	-1.81399	-1.45587	-1.12177	-1.81399	-1.81399	-1.81399	-1.81399	3.76933	-0.732722	2.8295	-1.81399	0.734135	-1.81399	4.98665	4.06577	3.55871	4.93254	1.92541	4.59147	4.43194	-1.0235	5.85733	3.95687	5.05381	-1.81399	-0.862492	-0.862777	2.02773	-1.81399	3.64439	2.98762	1.79691	-0.915587	1.37475	-0.912872	-1.81399	3.3006
ENSMUSG00000025401	Myo1a	Myo1a	432516	-7.52768	3.16351	12.1248	0.00082667	0.0409989	down	8cWT-2cWT	2cWT-2cKO	Myo1a	-1.81399	-0.72516	-1.81399	-1.81399	-1.81399	-1.81399	-1.81399	-1.81399	1.69887	3.6119	-1.81399	3.32818	-1.81399	-1.81399	5.18111	3.99602	4.7769	-1.81399	-0.422539	-1.81399	5.92789	-1.02569	2.37673	5.70713	1.33444	5.68776	2.13734	3.82307	1.08024	0.651443	1.76551	4.25523	-1.81399	-1.81399	-1.81399	-1.81399	0.566096
ENSMUSG00000020100	Slc29a3	Slc29a3	71279	-7.46071	3.68814	12.5223	0.000712132	0.0378158	down	8cWT-2cWT	2cWT-2cKO	Slc29a3	-1.81399	-1.81399	-1.81399	-1.81399	-1.81399	-1.81399	6.1517	3.05679	2.81861	3.04362	5.74855	5.92225	4.95995	5.57266	3.30652	3.25472	1.44584	-1.81399	-1.40834	-1.1431	-1.81399	-1.81399	-1.81399	3.62723	-1.81399	3.70411	-1.26137	-1.81399	-1.81399	4.74785	3.2026	2.19373	4.97689	-1.81399	5.1723	0.620496	4.73329
ENSMUSG00000024922	Ovol1	Ovol1	18426	-6.90935	3.6811	16.6815	0.000108073	0.0138128	down	8cWT-2cWT	2cWT-2cKO	Ovol1	-1.81399	-1.81399	-1.12177	-1.81399	-1.81399	-0.215469	4.11625	2.26942	0.177225	-1.81399	3.93608	3.815	1.33758	-1.81399	-1.46129	4.58467	5.39417	1.97998	4.5061	4.33897	0.79662	3.66571	3.63554	5.04716	-0.779127	4.52313	4.895	4.75883	3.91558	4.48327	4.59797	4.17842	5.66272	1.68836	1.32476	4.59045	0.566096
ENSMUSG00000030083	Abtb1	Abtb1	80283	-6.62181	3.86193	16.3178	0.000126517	0.0147624	down	8cWT-2cWT	2cWT-2cKO	Abtb1	-1.81399	-0.545695	-1.81399	-1.81399	-1.81399	-1.81399	3.67588	4.394	2.42283	3.13984	2.50903	4.04563	3.80962	-0.944065	3.01474	0.489333	-0.372641	-1.81399	-0.613147	4.96266	5.73339	4.63751	-1.27372	4.10827	4.2651	1.79559	-0.862777	0.667502	4.21601	4.21004	1.88095	4.49933	4.33543	3.94455	5.02703	6.8603	5.3974
ENSMUSG00000038564	Ift172	Ift172	67661	-6.60121	3.1347	12.9975	0.000553851	0.033812	down	8cWT-2cWT	2cWT-2cKO	Ift172	-1.81399	-1.1692	-1.12177	-1.81399	-1.81399	-1.81399	2.08795	4.04331	4.09632	-1.81399	5.51258	3.75958	3.83818	3.27782	3.74827	2.28207	2.64098	0.922208	-0.103468	-1.43989	-1.0235	-0.518807	5.15713	3.85761	4.54867	4.73219	-1.81399	2.83988	1.55885	-0.10847	-1.23101	0.21971	2.50852	4.46684	4.26302	3.36575	0.566096
ENSMUSG00000018569	Cldn7	Cldn7	53624	-6.24194	4.23423	15.7035	0.000165387	0.0166201	down	8cWT-2cWT	2cWT-2cKO	Cldn7	-1.81399	-1.45587	-0.655954	-1.81399	-1.81399	-1.81399	5.62865	6.25502	6.00406	4.11637	4.04512	5.66006	5.85893	6.52843	-1.1781	-1.3727	4.21212	1.92541	-1.81399	5.51827	1.76433	3.98115	1.38394	3.467	-0.779127	-1.26118	3.56477	3.60148	0.691803	3.78565	4.34	3.37928	2.84091	3.90467	6.17483	-1.81399	-1.81399
ENSMUSG00000091490	Triml2	Triml2	622117	-6.22533	4.04268	12.9724	0.000560245	0.0339539	down	8cWT-2cWT	2cWT-2cKO	Triml2	-1.21727	-1.45587	-1.12177	-1.81399	-1.81399	-1.81399	2.81319	5.18784	1.32536	6.72866	7.05289	3.72528	3.68936	4.33432	4.24426	0.773224	3.24155	-0.200781	-1.81399	2.24687	4.09536	-0.518807	5.31528	-1.81399	-1.81399	4.6957	1.18623	-1.31136	-1.81399	5.58776	3.07507	1.2477	5.27118	3.28238	-0.0856931	5.52415	-1.81399
ENSMUSG00000005142	Man2b1	Man2b1	17159	-5.04888	3.72998	11.393	0.0011617	0.0483923	down	8cWT-2cWT	2cWT-2cKO	Man2b1	-0.2056	-1.45587	-1.12177	-1.81399	-1.81399	0.524193	2.93044	3.24607	1.65108	1.3556	-1.81399	5.11492	5.36516	4.74848	3.3956	4.20149	1.8094	-1.21483	-0.254201	1.93373	4.92479	4.84895	0.398257	4.70231	-0.779127	5.38259	3.65875	3.14064	1.71322	5.12106	5.99386	4.75581	3.4397	3.8427	3.86734	1.77269	-1.81399
ENSMUSG00000025068	Gsto1	Gsto1	14873	-4.77046	4.69143	12.4996	0.000695571	0.0376583	down	8cWT-2cWT	2cWT-2cKO	Gsto1	-1.81399	-0.242423	-1.81399	-1.81399	1.72925	-0.803809	4.55407	6.73224	5.2009	5.83668	4.58613	7.15193	5.54051	7.3553	2.97193	4.75745	-0.792902	-1.81399	0.817103	-0.194725	4.30678	5.86247	3.07439	3.25244	-0.182729	-0.550463	4.42785	6.09435	-0.0742253	3.64439	5.49524	2.99734	0.0307989	3.00907	1.06606	5.35779	2.34166
ENSMUSG00000022545	Ercc4	Ercc4	50505	-4.49175	4.84164	15.383	0.000190369	0.0176767	down	8cWT-2cWT	2cWT-2cKO	Ercc4	3.28607	-0.930165	-1.81399	0.109239	-1.81399	0.7879	4.95554	3.48194	-1.35775	2.70921	3.26275	5.31654	4.79491	5.0999	5.55918	4.80024	5.35687	2.78099	4.3252	4.90707	6.09925	5.82613	6.30777	6.08869	4.60281	4.74654	6.46425	5.83151	6.20587	1.51454	2.62327	2.15861	1.00323	6.21678	6.19926	2.5663	-1.81399
ENSMUSG00000028955	Vamp3	Vamp3	22319	-4.20411	4.49379	13.85	0.00037649	0.0265697	down	8cWT-2cWT	2cWT-2cKO	Vamp3	2.0766	1.42672	-0.304395	-1.81399	-1.81399	-1.81399	5.79765	5.18784	6.1701	1.3556	4.24122	4.60037	0.975669	4.71008	3.76508	4.14453	4.7973	3.8712	4.11063	4.75344	-0.51573	3.02534	3.88299	5.01343	5.5024	4.72497	4.32649	5.07519	5.83744	2.92099	5.71146	5.5558	4.66382	6.03938	4.35286	3.17878	0.566096
ENSMUSG00000037465	Klf10	Klf10	21847	-4.13721	4.9798	13.78	0.000388543	0.0268341	down	8cWT-2cWT	2cWT-2cKO	Klf10	2.38901	1.38307	-0.655954	-1.81399	1.35488	-0.803809	5.98551	6.02165	5.92085	5.44302	7.30393	6.23624	5.15419	5.38632	4.06577	4.88714	5.61134	4.1817	7.25929	3.99493	1.47229	4.23985	4.80379	4.24244	4.80878	5.63861	-1.81399	5.22446	2.89491	-1.81399	5.97449	-0.465039	4.29988	3.0462	1.41651	5.37967	0.566096
ENSMUSG00000036678	Aaas	Aaas	223921	-4.04892	5.423	19.4245	3.37378e-05	0.00657157	down	8cWT-2cWT	2cWT-2cKO	Aaas	1.21668	-1.45587	-1.12177	-1.81399	0.847977	1.78958	7.60635	6.79758	6.28807	7.009	6.26486	7.32321	5.95985	6.62792	3.23591	5.04667	2.92673	3.33549	5.15588	5.12112	0.959432	4.57631	2.05661	4.81625	2.38034	-1.26118	5.46672	5.04443	4.78491	5.32772	5.12846	6.49448	5.22454	5.07285	6.4761	1.48047	5.3131
ENSMUSG00000027775	Mfsd1	Mfsd1	66868	-3.91566	6.74977	46.7224	1.76084e-09	7.31673e-06	down	8cWT-2cWT	2cWT-2cKO	Mfsd1	3.30745	2.23009	4.87555	3.04036	3.54241	1.52621	5.69091	6.65269	5.85646	6.96371	5.21874	4.74435	6.76159	7.23985	7.92504	7.7813	7.23249	6.96954	6.66651	6.95472	6.7182	7.20867	7.5356	7.96393	5.51186	8.69101	6.78394	6.53886	7.27923	7.0151	7.2964	6.43886	5.75094	4.29238	7.26672	6.01823	6.90563
ENSMUSG00000056394	Lig1	Lig1	16881	-3.60968	5.53109	13.7276	0.000397834	0.0272115	down	8cWT-2cWT	2cWT-2cKO	Lig1	-0.796383	1.42672	-1.12177	1.79137	-1.81399	3.06359	5.99002	6.63399	6.21188	8.28234	7.37616	5.3507	5.35531	6.90931	1.60464	5.56684	-0.792902	-0.200781	6.46411	0.171606	5.63441	0.955004	6.35862	3.67116	4.76197	4.78179	1.55547	6.20047	4.30369	3.1473	5.95979	3.85559	5.05361	6.65268	5.55198	4.25394	5.78935
ENSMUSG00000027074	Slc43a3	Slc43a3	58207	-2.98572	6.40187	26.0098	2.40656e-06	0.00137929	down	8cWT-2cWT	2cWT-2cKO	Slc43a3	3.6125	4.2261	4.83186	2.73085	3.44538	-0.803809	7.06581	7.09981	6.30939	7.55849	6.5687	6.5587	6.44618	6.88078	7.28689	5.82687	6.65123	7.44121	7.60415	6.56984	6.51715	5.92272	6.4403	6.261	6.19127	6.65934	7.03968	6.71848	4.32779	4.51066	6.48271	6.64955	6.54557	7.33148	5.98557	4.98228	4.97192
ENSMUSG00000014313	Cox6c	Cox6c	12864	-2.56488	6.56103	15.5349	0.000178072	0.0172044	down	8cWT-2cWT	2cWT-2cKO	Cox6c	-0.796383	2.98129	4.7403	0.905285	5.1037	4.50982	7.45638	7.2138	8.15354	6.81863	7.32301	6.54237	5.69684	7.79209	7.34745	6.0757	7.32144	3.68666	6.98316	7.96186	5.28106	5.99466	6.48469	7.52152	4.73798	5.04234	4.61141	6.46335	5.31754	6.94654	6.90458	6.55481	6.21427	7.01535	6.72631	1.11364	7.06876
ENSMUSG00000015804	Med28	Med28	66999	-2.45739	6.05247	12.996	0.000554232	0.033812	down	8cWT-2cWT	2cWT-2cKO	Med28	4.73633	3.28391	3.7649	-1.81399	4.57142	4.84995	6.68415	6.17704	6.60582	2.09255	6.82338	4.82215	6.55342	5.35763	6.49182	6.04268	7.11856	5.46152	7.08087	7.59244	4.67816	4.66129	6.59869	7.18447	7.24913	7.35661	5.92007	3.19767	5.73302	4.84791	6.23128	5.79469	6.38517	4.7176	6.18139	5.75925	1.42041
ENSMUSG00000019820	Utrn	Utrn	22288	-2.20195	7.22674	16.3201	0.000137968	0.0153378	down	8cWT-2cWT	2cWT-2cKO	Utrn	6.81524	3.46232	0.214167	1.41531	5.87366	4.16017	7.63686	6.05859	7.24677	7.9719	8.64556	7.88645	5.29478	7.58221	7.22898	7.59339	7.21838	7.51582	6.74809	7.34522	6.87436	6.72718	7.34814	6.88486	6.32612	8.64772	6.883	7.30648	7.01734	6.08358	7.06804	7.53562	7.47128	7.09059	7.91881	8.83408	6.01957
ENSMUSG00000031447	Lamp1	Lamp1	16783	-1.95572	7.19333	14.4837	0.000283482	0.023201	down	8cWT-2cWT	2cWT-2cKO	Lamp1	5.25417	5.24589	5.20499	4.38785	1.35488	0.201254	8.67906	8.52774	9.16058	7.97516	6.23064	7.81824	8.46914	8.75035	6.67646	7.10501	6.00248	6.64168	5.03918	5.5652	6.17578	5.44978	7.49381	5.14386	8.00135	3.97169	6.1451	6.73463	6.20262	7.90026	7.85645	7.52273	7.06829	6.74591	7.17774	7.42054	5.22357
ENSMUSG00000027247	Arhgap1	Arhgap1	228359	-1.63965	6.88487	13.3684	0.000467957	0.0302519	down	8cWT-2cWT	2cWT-2cKO	Arhgap1	5.62595	5.42877	5.34832	3.86602	3.63331	1.20378	7.85526	7.24987	8.47035	8.45592	8.66385	7.21921	7.78925	7.35633	6.66082	5.27615	6.45816	6.54319	5.84176	6.59895	6.20042	5.90789	6.59869	6.50141	6.54472	6.06214	6.8716	6.12162	6.96835	6.22674	7.70558	6.34044	6.62314	6.865	7.2744	6.87578	5.90905
ENSMUSG00000038587	Akap12	Akap12	83397	-1.51546	8.41184	23.7761	5.76194e-06	0.00252024	down	8cWT-2cWT	2cWT-2cKO	Akap12	7.09592	7.9624	6.69987	6.44059	7.05416	7.39362	8.45031	7.7259	8.25644	7.96206	8.63143	8.59634	7.87273	8.08001	8.80452	9.27783	8.66352	7.77308	9.22958	9.24707	8.39608	8.42428	8.742	8.22492	9.23965	8.39346	8.42721	7.93563	8.77254	9.30643	8.6178	7.9102	9.32945	8.58721	7.83918	8.03775	8.00142
ENSMUSG00000042520	Ubap2l	Ubap2l	74383	-1.30354	7.84841	11.306	0.00120996	0.0491706	down	8cWT-2cWT	2cWT-2cKO	Ubap2l	7.30043	6.42669	7.83478	6.61438	3.34136	6.01999	7.90744	8.5873	7.29519	7.92878	8.36181	8.11835	8.05563	8.52187	7.68332	8.17638	8.61981	8.45576	8.54114	7.41947	8.26207	7.5421	7.81838	8.00913	8.16398	8.02553	7.76193	7.51438	8.10998	8.1285	8.04347	7.63238	8.53177	6.96048	8.06642	6.70437	4.52422
ENSMUSG00000078872	NA	ENSMUSG00000078872	NA	-8.05566	3.35109	11.7949	0.000993267	0.0442796	down	8cWT-2cWT:8cKO-2cKO	2cWT-2cKO	ENSMUSG00000078872	-1.81399	-1.81399	-1.81399	-1.81399	-1.81399	-1.81399	-1.81399	-1.81399	-1.35775	-1.81399	-1.81399	-1.35668	-1.81399	4.00483	-1.46129	1.98107	3.43622	-1.21483	1.99206	2.36946	2.99323	5.18862	-1.81399	-1.81399	2.05745	-1.81399	-1.26137	-1.81399	-1.81399	3.95476	4.02564	2.93644	3.15133	4.98952	6.62777	-0.13463	6.72167
ENSMUSG00000031799	Tpm4	Tpm4	326618	-5.52911	4.728	17.4679	7.70725e-05	0.0117482	down	8cWT-2cWT:8cKO-2cKO	2cWT-2cKO	Tpm4	-1.81399	-1.81399	-1.81399	0.109239	0.0596176	-1.81399	5.63442	7.03569	6.69543	5.80768	6.72847	5.95468	5.8165	6.99699	4.17675	3.03947	2.79092	-0.466615	1.37459	0.778753	-1.81399	3.43694	3.8703	2.76108	0.237992	2.55138	1.79505	3.96123	0.962012	4.68912	4.3993	0.349944	5.77055	3.11772	3.90742	5.35779	4.18793
ENSMUSG00000030214	Plbd1	Plbd1	66857	-5.46572	4.16907	13.9453	0.00036071	0.0260135	down	8cWT-2cWT:8cKO-2cKO	2cWT-2cKO	Plbd1	-1.81399	-0.930165	-1.12177	-1.81399	0.0596176	-1.81399	3.65332	4.41168	0.730876	4.33538	3.72284	5.42738	2.68981	5.43815	4.61267	4.9263	1.54568	0.922208	2.51918	-1.81399	2.21483	2.74295	3.8184	-0.76113	-0.450327	1.10003	-0.294451	3.91663	3.81685	6.07901	5.28338	6.47499	4.24485	3.18586	7.17856	0.620496	2.34166
ENSMUSG00000005397	Nid1	Nid1	18073	-5.40808	5.75611	13.0503	0.000790902	0.0399562	down	8cWT-2cWT:8cKO-2cKO	2cWT-2cKO	Nid1	-1.81399	-1.81399	-0.304395	0.109239	-1.81399	-1.81399	6.45219	6.67483	6.26245	6.67347	7.96204	6.97589	6.78745	7.3196	-1.46129	-1.03526	-1.81399	3.58471	-1.40834	-1.81399	5.52162	3.82152	4.7214	-1.47068	-1.81399	2.51833	1.4189	0.30183	3.04785	6.67714	6.88224	5.79754	5.01027	6.66168	7.18754	7.85464	6.28598
ENSMUSG00000031483	Erlin2	Erlin2	244373	-4.11317	4.50053	12.8129	0.00060256	0.0345308	down	8cWT-2cWT:8cKO-2cKO	2cWT-2cKO	Erlin2	0.800197	-0.930165	-0.655954	-1.81399	-1.81399	-0.215469	5.65728	6.05859	4.95247	2.70921	5.25324	4.69203	6.20434	5.63206	3.52955	4.54749	3.42315	3.91387	2.15048	-1.81399	2.55763	3.51729	1.06561	2.47418	0.702058	2.5837	4.06564	-1.31136	4.51788	6.01349	5.47241	5.76872	5.49991	5.03641	6.56274	0.620496	3.87162
ENSMUSG00000040479	Dgkz	Dgkz	104418	-3.83954	5.95477	29.6835	5.99163e-07	0.000680593	down	8cWT-2cWT:8cKO-2cKO	2cWT-2cKO	Dgkz	1.21668	2.81054	2.42306	0.905285	-1.81399	-0.803809	7.62096	6.47489	6.64141	6.51206	6.84239	4.92144	6.18779	7.19189	5.24543	4.68511	4.07683	3.75083	4.76318	6.66388	5.19377	5.70555	6.1825	5.45909	6.22619	5.04814	3.33736	5.71588	3.51484	7.38993	6.03494	6.71899	6.27961	7.57166	5.19838	6.59642	6.43303
ENSMUSG00000036820	Amdhd2	Amdhd2	245847	-3.66532	4.93393	12.0601	0.000851793	0.0415181	down	8cWT-2cWT:8cKO-2cKO	2cWT-2cKO	Amdhd2	-1.81399	2.67229	-1.81399	0.109239	-1.81399	-0.803809	3.53487	5.53298	5.33927	6.11044	6.27609	5.50694	3.80962	3.60528	5.36605	2.34121	2.2551	1.92541	-1.81399	3.34124	5.34137	4.17527	3.39099	2.30605	3.69631	1.41942	5.14819	3.01933	5.90309	6.29922	6.13136	5.49727	4.89585	4.89091	5.72121	7.32794	6.35085
ENSMUSG00000034006	Slc66a2	Slc66a2	66943	-3.34851	5.54818	15.7318	0.000163346	0.0165548	down	8cWT-2cWT:8cKO-2cKO	2cWT-2cKO	Slc66a2	-1.21727	0.916121	-0.0219397	0.905285	0.0596176	1.90519	6.62159	6.94298	7.80548	5.4048	5.56845	5.93481	7.57689	7.07964	5.15264	0.489333	4.19685	4.58522	3.33236	-0.194725	-0.51573	4.23985	4.06103	3.06757	3.83847	3.29953	3.86995	5.28273	1.55885	6.90843	6.62301	5.7832	5.05361	6.82282	6.20248	2.40501	6.39252
ENSMUSG00000052565	H1f3	H1f3	14957	-3.30935	7.81181	24.3537	1.28988e-05	0.00351459	down	8cWT-2cWT:8cKO-2cKO	2cWT-2cKO	H1f3	-0.796383	-0.242423	3.66884	2.73085	1.72925	2.3751	9.45258	8.92363	9.29978	7.19965	6.0786	9.14572	9.14977	8.08877	4.832	4.90195	6.59408	5.07956	5.85563	4.35092	5.62837	5.29882	4.85621	3.516	6.66198	6.99292	4.14355	3.544	4.74966	10.2682	8.60054	9.91961	8.6468	7.68636	8.77225	6.40704	8.8023
ENSMUSG00000026421	Csrp1	Csrp1	13007	-3.09466	5.82715	13.9793	0.000355234	0.0257832	down	8cWT-2cWT:8cKO-2cKO	2cWT-2cKO	Csrp1	-1.21727	2.89066	-1.12177	0.109239	0.0596176	-1.81399	6.39213	7.01704	6.98046	6.83309	8.84443	6.48373	6.0663	7.52621	1.56678	1.21392	4.93714	3.60221	3.44674	4.67002	5.2181	3.46422	4.596	4.37585	0.56332	3.87053	3.98327	-0.00631677	3.04785	7.76034	6.16591	6.13673	5.38584	7.0682	5.24293	5.35779	1.42041
ENSMUSG00000017499	Cdc6	Cdc6	23834	-1.97415	6.94613	14.8938	0.000236265	0.02056	down	8cWT-2cWT:8cKO-2cKO	2cWT-2cKO	Cdc6	2.34832	3.99912	1.78101	4.63844	5.79708	3.96081	6.7574	7.53643	7.76044	6.74405	6.89796	8.34987	7.3626	7.56259	6.76375	3.9775	6.67347	5.15857	6.59528	7.42866	7.13724	5.6825	2.83419	6.1032	6.93599	6.45831	5.61085	5.89324	5.01758	7.92338	8.21588	8.5003	7.78111	7.5796	8.13048	7.6175	6.39252
ENSMUSG00000024663	Rab3il1	Rab3il1	74760	-1.74964	6.7161	11.8839	0.000924214	0.042777	down	8cWT-2cWT:8cKO-2cKO	2cWT-2cKO	Rab3il1	3.38997	5.2182	2.22112	2.33626	2.27236	4.06393	6.66172	7.73383	7.0068	8.16434	7.92506	8.11284	7.61452	7.15424	5.01533	4.19349	5.26099	5.3827	6.2017	3.91667	5.48867	6.07208	5.80311	5.76706	5.78202	5.51836	6.34681	5.0599	3.26314	7.77876	7.9003	7.84197	8.14774	7.44358	8.154	6.77209	3.98494
ENSMUSG00000025223	Ldb1	Ldb1	16825	-1.60162	6.91278	14.0306	0.000347153	0.0255311	down	8cWT-2cWT:8cKO-2cKO	2cWT-2cKO	Ldb1	5.20942	3.98458	4.3645	3.17332	2.48257	5.76078	7.54791	7.31357	8.21287	7.90159	8.42497	7.88126	7.52073	7.56618	6.40732	6.12702	6.62293	6.30751	6.7193	5.72988	6.83294	5.50338	4.80379	5.90774	6.47143	6.17516	6.20084	4.8085	6.31541	7.83267	7.77064	7.55685	7.31976	6.975	7.34762	7.54675	7.02968
ENSMUSG00000021553	Slc28a3	Slc28a3	114304	-6.71734	4.3632	12.1783	0.000833741	0.0409989	down	8cWT-8cKO:8cWT-2cWT	2cWT-2cKO	Slc28a3	-1.81399	-1.81399	-1.81399	-1.81399	0.0596176	-1.81399	3.6071	5.37972	5.66219	7.0405	8.18692	3.5138	4.62501	6.04845	0.298174	-1.81399	-1.81399	-1.81399	-1.40834	2.60729	5.71071	0.792283	-1.81399	2.14091	4.83917	-0.550463	3.94648	-0.643817	-1.81399	-0.487658	2.33013	-1.34221	0.341761	-1.01655	-1.81399	-1.81399	3.11389
ENSMUSG00000041571	Selenow	Selenow	20364	-3.07309	5.32398	11.8352	0.000945373	0.0430947	down	8cWT-8cKO:8cWT-2cWT	2cWT-2cKO	Selenow	3.89276	0.00803897	0.214167	-1.81399	1.35488	1.78958	4.16493	6.68395	7.0245	6.92372	6.54104	6.8843	6.95003	7.45832	3.67008	4.91661	6.1545	2.68572	6.32812	5.16241	3.46928	5.97108	4.84976	4.22486	4.06106	5.34065	5.34949	3.28798	3.26314	3.21548	4.22453	2.44757	2.56951	-0.129601	0.885171	5.84036	-1.81399
ENSMUSG00000032249	Anp32a	Anp32a	11737	-3.49607	5.83602	14.8733	0.000238413	0.0206389	down	8cWT-8cKO:8cWT-2cWT:8cKO-2cKO	2cWT-2cKO	Anp32a	-1.81399	-1.45587	1.78101	0.109239	-1.81399	-0.803809	7.46612	7.79573	8.11001	7.55849	7.73062	6.01981	8.11956	8.08627	3.71404	4.33842	0.541531	0.217749	4.08731	4.05462	-1.81399	1.92582	2.93512	4.28829	1.70821	2.41434	-1.81399	1.47181	4.50737	5.58776	6.26488	3.86651	4.06591	5.43671	3.157	5.14439	5.22357
ENSMUSG00000024406	Pou5f1	Pou5f1	18999	-1.27472	8.30829	12.7587	0.000617683	0.0349201	down	8cWT-8cKO:8cWT-2cWT:8cKO-2cKO	2cWT-2cKO	Pou5f1	5.91433	5.99975	6.81205	6.81089	5.964	4.93403	9.47768	9.4413	9.23363	9.9401	10.053	9.44961	9.32774	9.53442	7.69653	7.98394	8.22878	7.2449	8.22047	7.47172	6.85897	7.27566	6.14875	7.68952	6.93599	7.72588	7.68863	7.18363	5.38802	9.24097	8.99724	8.37921	8.07335	8.60987	7.62149	5.94676	6.86179
ENSMUSG00000096497	Olfr787	Olfr787	258069	-9.17644	2.2525	12.7865	0.000631701	0.0354713	down	NA	2cWT-2cKO	Olfr787	-1.81399	-1.81399	-1.81399	-1.81399	-1.81399	-1.81399	-1.81399	-1.81399	-1.81399	-1.81399	-0.773871	-1.81399	-1.81399	-1.81399	1.17219	-1.81399	2.49876	4.19329	4.85811	4.28391	4.29157	-1.81399	-0.57353	3.37437	-1.81399	4.88265	-1.81399	4.45011	-1.14955	-1.81399	-1.81399	-1.81399	-1.81399	-1.81399	3.34388	-1.81399	-1.81399
ENSMUSG00000113664	NA	ENSMUSG00000113664	NA	-9.14504	2.25242	13.8944	0.000384259	0.0268341	down	NA	2cWT-2cKO	ENSMUSG00000113664	-1.81399	-1.81399	-1.81399	-1.81399	-1.81399	-1.81399	-1.81399	-1.81399	-1.81399	-1.81399	-1.81399	-0.496733	-1.81399	-1.81399	4.12559	4.50932	2.16379	-1.81399	4.03138	5.08937	0.79662	-1.02569	3.8184	2.49389	3.80807	-1.26118	-1.26137	-1.81399	4.48611	-1.81399	-1.49325	1.65293	-1.81399	-1.01655	3.33215	-1.81399	-1.81399
ENSMUSG00000114688	NA	ENSMUSG00000114688	NA	-8.85186	2.42356	12.5516	0.000702687	0.0378158	down	NA	2cWT-2cKO	ENSMUSG00000114688	-1.81399	-1.81399	-1.81399	-1.81399	-1.81399	-1.81399	-1.81399	-1.81399	-1.81399	2.27311	-0.773871	-1.35668	-1.81399	-1.81399	3.7567	4.74656	2.39551	3.70297	2.67331	3.66226	-1.0235	-1.81399	4.97948	3.54463	-1.20569	-1.81399	-1.81399	-0.00631677	1.78462	-1.81399	2.08734	-0.987281	3.95599	0.168613	5.27085	-1.81399	-1.81399
ENSMUSG00000022912	Pros1	Pros1	19128	-8.74091	2.00668	12.1079	0.000860337	0.0416503	down	NA	2cWT-2cKO	Pros1	-1.81399	-1.81399	-1.81399	-1.81399	-1.81399	-1.81399	-1.81399	-1.81399	-1.81399	-1.81399	-0.17578	-1.35668	-1.81399	-1.81399	3.19926	3.57112	1.54568	-1.81399	3.93885	-0.897071	4.43688	1.92582	-1.81399	4.08896	1.49574	4.71771	2.44928	-1.81399	-1.81399	0.999652	-1.81399	-1.81399	-1.81399	1.77939	4.13381	-1.81399	-1.81399
ENSMUSG00000113352	Gm34639	Gm34639	102637956	-8.70853	1.90156	12.4276	0.000743467	0.038844	down	NA	2cWT-2cKO	Gm34639	-1.81399	-1.81399	-1.81399	-1.81399	-1.81399	-1.81399	-1.05064	-1.81399	-1.81399	-1.81399	-1.81399	-1.81399	-1.81399	-1.81399	2.70196	3.93013	1.92514	-1.81399	-1.40834	1.49064	-1.81399	3.98115	5.22847	3.08066	3.91179	-1.81399	-1.81399	-1.81399	3.10476	0.999652	1.96184	-1.81399	-1.81399	-1.01655	-1.15558	-0.13463	3.3006
ENSMUSG00000029445	Hpd	Hpd	15445	-8.59409	1.98234	11.4028	0.00119044	0.0488092	down	NA	2cWT-2cKO	Hpd	-1.81399	-1.81399	-1.81399	-1.81399	-1.81399	-1.81399	-1.81399	-0.879239	-1.81399	-1.81399	-1.81399	-1.81399	-1.81399	-1.31443	-1.1781	3.41471	-1.38837	-1.81399	-0.832828	-1.81399	5.1268	-1.81399	3.8575	0.169781	5.35245	0.565203	-1.81399	-0.398674	-1.81399	0.439729	-1.49325	3.64336	-1.81399	3.0824	3.33215	-1.81399	-1.81399
ENSMUSG00000097006	9530082P21Rik	9530082P21Rik	638247	-8.44971	1.69024	11.5211	0.001127	0.047575	down	NA	2cWT-2cKO	9530082P21Rik	-1.81399	-1.81399	-1.81399	-1.81399	-1.81399	-1.81399	-1.81399	-1.2722	-1.35775	-1.81399	-1.81399	-1.81399	-1.81399	-1.81399	0.202664	-0.160071	3.38323	3.79716	-1.81399	-0.897071	-1.81399	2.27304	-1.27372	2.28358	4.81644	1.90195	-1.26137	4.21251	3.13239	-1.81399	-1.81399	-1.34221	-1.81399	-1.81399	3.85099	-1.81399	-1.81399
ENSMUSG00000001506	Col1a1	Col1a1	12842	-8.367	1.49574	11.6856	0.00104453	0.0455726	down	NA	2cWT-2cKO	Col1a1	-1.81399	-1.81399	-1.81399	-1.81399	-1.81399	-1.81399	-1.81399	-1.81399	-1.81399	-1.81399	-0.773871	-1.81399	-1.81399	-1.81399	-1.46129	-1.81399	-1.81399	-1.81399	-1.81399	2.97482	3.44199	3.94287	0.656536	1.48844	4.45367	2.09369	4.16506	1.7512	2.20471	-1.00349	-1.81399	1.75049	-0.915587	-1.81399	-1.44755	-1.81399	0.566096
ENSMUSG00000085133	NA	ENSMUSG00000085133	NA	-7.92561	2.26482	12.188	0.000802909	0.0401962	down	NA	2cWT-2cKO	ENSMUSG00000085133	-1.81399	-1.45587	-1.81399	-1.81399	-1.81399	-1.81399	2.85334	0.537079	-1.81399	-1.81399	-1.81399	-1.81399	-1.81399	-1.31443	4.22616	2.34121	-1.38837	2.84119	2.08919	-0.503573	-1.0235	1.92582	4.9971	1.48844	-0.779127	4.80254	4.27796	2.86357	4.20303	-1.00349	2.98762	-1.81399	-1.81399	1.25298	1.66122	-1.81399	-1.81399
ENSMUSG00000091994	E130317F20Rik	E130317F20Rik	414101	-7.4995	3.54534	14.5503	0.0002752	0.0231015	down	NA	2cWT-2cKO	E130317F20Rik	-0.2056	-1.81399	-1.81399	-1.81399	-1.81399	-1.81399	-1.81399	1.96861	3.05733	1.6451	-1.81399	0.734135	-1.81399	-1.81399	4.34275	-1.81399	4.55529	0.388836	3.54132	0.70616	4.73548	6.07651	4.18917	5.81092	4.28731	6.1484	4.29757	3.68363	5.08983	-1.81399	-1.49325	-0.987281	-1.81399	-1.81399	4.48589	-1.81399	0.566096
ENSMUSG00000043487	Acot6	Acot6	217700	-7.40121	3.17459	13.154	0.000515773	0.0326472	down	NA	2cWT-2cKO	Acot6	-1.81399	-1.45587	-1.12177	-1.81399	-1.81399	-1.81399	-1.81399	-0.570722	-1.35775	-1.81399	-1.81399	-1.81399	2.75117	-1.81399	2.6666	4.05019	4.64243	5.15265	0.890802	-1.81399	-0.140895	0.398643	4.5727	3.79545	2.89607	5.53499	3.48149	-1.81399	0.158614	3.31207	3.01315	0.682166	0.341761	3.77795	3.157	-1.81399	6.49173
ENSMUSG00000099623	Gm4526	Gm4526	100043574	-7.27052	3.6935	16.2928	0.000127898	0.0147624	down	NA	2cWT-2cKO	Gm4526	-1.21727	-1.45587	-0.655954	-1.81399	-1.81399	-0.803809	2.33481	-1.81399	-1.81399	-1.81399	-1.81399	-1.81399	-1.81399	-1.81399	6.57998	4.49637	4.88568	4.23876	5.02288	3.31706	6.13377	4.07264	4.12652	5.60664	2.29522	-0.294066	2.70563	4.1073	5.17866	-1.00349	-1.49325	3.57842	-0.366145	1.48704	4.48059	-1.81399	-1.81399
ENSMUSG00000027180	Fbxo3	Fbxo3	57443	-6.48589	3.80579	17.6127	7.2449e-05	0.0113601	down	NA	2cWT-2cKO	Fbxo3	-1.81399	-0.545695	-0.0219397	-1.81399	-1.81399	-0.215469	0.351813	0.402074	1.13	2.09255	-0.773871	-1.81399	-1.81399	2.53988	5.89711	4.4023	4.49413	-0.200781	4.77296	1.8006	3.46928	6.08971	4.77685	4.88128	5.19688	5.69886	4.55549	4.13676	5.70108	0.191513	2.2248	3.05576	4.22603	-1.01655	3.20925	-0.13463	-1.81399
ENSMUSG00000004085	Map3k20	Map3k20	65964	-5.81516	3.43393	11.4987	0.00110568	0.0470566	down	NA	2cWT-2cKO	Map3k20	-1.81399	0.00803897	-1.81399	-1.81399	-1.81399	0.201254	-1.81399	-1.81399	1.1981	2.8295	-0.773871	-1.35668	1.62667	2.48028	5.78823	3.42841	4.12604	5.25576	4.66157	3.41141	-0.51573	2.91101	1.5837	4.98934	0.702058	5.43224	3.99533	1.69949	2.39924	-1.81399	3.31977	2.44757	4.4854	-1.01655	1.00825	-1.81399	6.07182
ENSMUSG00000043110	Lrrn4	Lrrn4	320974	-4.27927	4.50442	11.9665	0.000889519	0.0423905	down	NA	2cWT-2cKO	Lrrn4	0.800197	2.67229	-1.81399	0.109239	-1.81399	1.37398	-1.81399	3.6403	4.19127	-0.229281	1.57937	2.68635	1.16794	3.895	5.2334	6.18467	3.34217	4.1817	4.72843	4.02509	5.33397	4.01845	5.4578	5.73015	4.53945	4.26863	6.49004	5.85238	4.8446	-1.81399	5.76128	2.99734	5.4027	5.94423	5.53928	-1.81399	-1.81399
ENSMUSG00000114771	NA	ENSMUSG00000114771	NA	-1.89403	6.46363	11.8889	0.000922096	0.042777	down	NA	2cWT-2cKO	ENSMUSG00000114771	5.93509	6.02127	5.42089	4.72764	0.0596176	4.16017	5.62865	5.28217	5.21329	3.74023	5.25324	6.63767	4.75052	5.74716	6.60003	7.05068	7.67972	7.04986	7.20885	6.89983	7.75696	4.77461	5.98773	7.07754	6.82838	5.19135	7.42674	7.79255	7.43852	5.5618	7.02868	5.8258	5.9533	5.36505	6.7319	5.79224	7.64411
ENSMUSG00000021039	Snw1	Snw1	66354	-1.80674	6.80041	14.2076	0.000320682	0.0240236	down	NA	2cWT-2cKO	Snw1	5.09108	4.28658	5.88146	5.32183	2.666	6.61987	6.68693	6.81761	6.08498	7.48255	6.95148	6.9868	4.35545	6.29972	6.91924	7.09645	7.54674	6.69566	8.14859	7.7732	8.27179	6.25115	6.45525	7.5969	7.21623	6.45613	6.56275	6.31659	6.86713	6.61539	6.93244	5.89678	7.58089	5.99259	7.12856	6.27322	5.82022
ENSMUSG00000058173	Smco4	Smco4	170748	-10.6212	3.57072	23.774	6.35471e-06	0.00263943	down	8cWT-2cWT	2cWT-2cKO:8cKO-2cKO	Smco4	-1.81399	-1.81399	-1.81399	-1.81399	-1.81399	-1.81399	-1.81399	0.537079	2.03308	-1.81399	-0.773871	-1.81399	-1.81399	-1.81399	3.84633	3.55871	6.51469	2.5837	6.57166	5.39956	-1.81399	3.38077	5.75561	4.34905	4.16068	4.14414	2.99704	4.08731	4.1088	-1.81399	-1.81399	-0.702657	-0.915587	-1.81399	-1.81399	-0.13463	0.566096
ENSMUSG00000049134	Nrap	Nrap	18175	-9.34965	2.42164	14.4531	0.000300041	0.0235235	down	8cWT-2cWT	2cWT-2cKO:8cKO-2cKO	Nrap	-1.81399	-1.81399	-1.81399	-1.81399	-1.81399	-1.81399	-1.05064	2.89021	-1.81399	-1.81399	-1.81399	-1.35668	1.97418	-1.81399	3.04259	5.24939	2.49876	2.17969	3.04015	2.54621	-1.81399	3.02534	4.433	4.32175	-0.779127	4.57227	-1.81399	5.01829	-1.81399	-0.487658	-1.81399	0.21971	-1.81399	-1.81399	-1.81399	-1.81399	-1.81399
ENSMUSG00000028551	Cdkn2c	Cdkn2c	12580	-8.98716	2.04126	14.5585	0.00028643	0.023201	down	8cWT-2cWT	2cWT-2cKO:8cKO-2cKO	Cdkn2c	-1.81399	-1.81399	-1.81399	-1.81399	-1.81399	-1.81399	1.87042	-1.81399	0.730876	-1.81399	-1.81399	-1.81399	-1.81399	-1.81399	2.41288	2.62916	4.67587	2.54802	4.49433	3.09341	2.95513	0.152501	4.40688	3.10649	-1.81399	2.001	2.64568	3.96123	-1.14955	-1.81399	-1.81399	-1.34221	-0.915587	-1.81399	-1.81399	-1.81399	-1.81399
ENSMUSG00000021496	Pcbd2	Pcbd2	72562	-8.47612	2.88071	13.3607	0.000469586	0.0302519	down	8cWT-2cWT	2cWT-2cKO:8cKO-2cKO	Pcbd2	-1.81399	-1.45587	-1.81399	-1.81399	-1.81399	-1.81399	0.742323	1.81764	-0.499085	-1.81399	4.45393	-1.81399	1.48935	2.24984	3.19926	2.76495	6.07319	-1.81399	3.94751	5.4725	-1.81399	-1.02569	0.875521	5.29751	3.34039	-0.294066	-1.81399	4.57734	0.534996	-1.81399	3.16892	-1.81399	-1.81399	-1.81399	-1.44755	-1.81399	-1.81399
ENSMUSG00000036885	Arhgef26	Arhgef26	622434	-5.58509	4.89303	17.2271	8.54456e-05	0.0122119	down	8cWT-2cWT	2cWT-2cKO:8cKO-2cKO	Arhgef26	2.21885	-0.72516	-1.12177	0.109239	0.0596176	-0.215469	-1.81399	-0.879239	4.90741	6.11044	1.57937	2.61321	-0.242772	3.69977	6.1062	3.31497	4.17363	3.65347	4.79232	2.91166	6.4191	1.35553	7.24747	5.35251	4.09923	6.42971	6.18776	6.16754	7.74075	5.19046	-1.00919	-1.34221	1.45504	3.31317	4.82837	-1.81399	-1.81399
ENSMUSG00000029063	Nadk	Nadk	192185	-1.72229	7.4381	14.531	0.000277575	0.0231838	down	8cWT-2cWT	2cWT-2cKO:8cKO-2cKO	Nadk	6.72673	6.82566	5.38506	3.04036	7.47254	0.524193	7.61368	7.41238	7.732	8.03894	6.61365	7.32702	7.11958	7.02984	8.32012	6.93065	7.90143	8.38106	7.14628	7.60995	8.65417	8.41644	7.56148	7.77404	7.71527	8.12153	8.14211	7.53481	7.83626	7.2788	6.90628	7.4106	6.87646	6.70876	6.50251	6.51969	5.88004
ENSMUSG00000050966	Lin28a	Lin28a	83557	-1.65295	7.0755	15.7394	0.000162806	0.0165548	down	8cWT-2cWT	2cWT-2cKO:8cKO-2cKO	Lin28a	5.82816	5.39345	6.53529	5.07224	5.71621	5.51906	6.91272	7.75389	8.43065	7.40722	7.28182	6.66959	6.09617	7.64123	6.5524	7.15943	7.98717	7.64068	8.10183	8.44431	6.36565	7.49161	6.89493	7.70387	5.42437	7.59822	6.97569	7.59797	6.32741	6.50052	6.82842	5.88876	6.89445	5.66274	6.30808	6.93607	6.84688
ENSMUSG00000017491	Rarb	Rarb	218772	-8.51682	1.84464	11.671	0.00110477	0.0470566	down	8cWT-8cKO:8cWT-2cWT	2cWT-2cKO:8cKO-2cKO	Rarb	-1.81399	-1.81399	-1.81399	-1.81399	-1.81399	-1.81399	0.903979	3.49858	-1.81399	-1.81399	0.245778	0.639068	-0.824285	3.13051	3.55877	-0.00470468	2.31291	5.15857	3.38432	3.94848	3.82661	-1.81399	-1.81399	1.48844	-0.450327	-1.81399	1.4888	-0.643817	-1.81399	-1.81399	-1.81399	-1.81399	-1.81399	-1.81399	-1.81399	-1.81399	-1.81399
ENSMUSG00000092274	Neat1	Neat1	66961	-4.36411	5.38341	19.377	3.44136e-05	0.00657457	down	8cWT-8cKO:8cWT-2cWT	2cWT-2cKO:8cKO-2cKO	Neat1	3.44891	-1.45587	2.93352	0.109239	-1.81399	-0.803809	5.54531	5.5003	4.61529	4.01853	6.27049	6.13317	7.10202	5.15335	6.92766	5.27615	0.805949	5.91097	6.60352	5.83575	5.68766	4.03674	5.47047	7.36449	1.64081	7.81366	5.93266	6.1556	4.80222	1.61893	3.8806	-0.261079	1.00323	1.25298	1.06606	0.620496	-1.81399
ENSMUSG00000102462	NA	ENSMUSG00000102462	NA	-10.32	3.26689	22.4086	1.08613e-05	0.00329077	down	NA	2cWT-2cKO:8cKO-2cKO	ENSMUSG00000102462	-1.81399	-1.81399	-1.81399	-1.81399	-1.81399	-1.81399	-1.81399	-1.2722	-1.35775	-1.81399	-1.81399	-1.81399	-1.81399	-1.81399	3.1489	3.15935	5.7275	1.54594	6.34133	6.50846	3.29722	-1.02569	0.249416	4.84722	0.702058	4.73219	3.56477	4.1073	0.359045	-1.81399	-1.81399	-1.81399	0.0307989	-0.129601	0.885171	-1.81399	-1.81399
ENSMUSG00000118282	Gm4840	Gm4840	225468	-10.3158	3.2611	22.8115	9.26365e-06	0.00307942	down	NA	2cWT-2cKO:8cKO-2cKO	Gm4840	-1.81399	-1.81399	-1.81399	-1.81399	-1.81399	-1.81399	-1.81399	-1.81399	-1.81399	-1.81399	-1.81399	-1.81399	-1.81399	-0.649622	4.21397	3.88115	4.13408	2.27005	4.96007	5.64018	4.68981	-1.02569	3.49383	5.44398	4.74602	4.29815	4.19674	5.92736	-1.81399	0.999652	-1.49325	-1.34221	-1.81399	-0.129601	-1.81399	-1.81399	-1.81399
ENSMUSG00000099681	NA	ENSMUSG00000099681	NA	-9.84223	2.8443	15.2815	0.000208712	0.0188923	down	NA	2cWT-2cKO:8cKO-2cKO	ENSMUSG00000099681	-1.81399	-1.81399	-1.81399	-1.81399	-1.81399	-1.81399	-1.81399	-1.2722	-1.81399	-0.229281	-1.81399	-1.81399	-1.81399	-1.31443	3.25983	5.26474	-1.81399	4.40751	4.52937	5.99848	0.959432	-1.81399	4.07216	5.16859	-1.20569	-1.81399	1.00726	5.07519	-0.696359	-1.81399	-1.81399	-1.81399	3.06924	-1.81399	-1.81399	-1.81399	-1.81399
ENSMUSG00000108831	Gm7957	Gm7957	100534347	-9.72542	2.68496	15.963	0.000168735	0.0167937	down	NA	2cWT-2cKO:8cKO-2cKO	Gm7957	-1.81399	-1.81399	-1.81399	-1.81399	-1.81399	-1.81399	-1.81399	-1.81399	-1.81399	-1.81399	-1.81399	-1.81399	-1.81399	-1.81399	-1.1781	3.22362	3.24155	4.30437	5.01053	6.62503	3.26644	3.64201	4.95566	1.02983	1.70821	-1.81399	-1.81399	-1.31136	-1.81399	-1.81399	-1.81399	-1.81399	-1.81399	-1.01655	-1.81399	-1.81399	-1.81399
ENSMUSG00000070618	Pramel20	Pramel20	329986	-9.65535	2.64039	16.7747	0.000109698	0.0138128	down	NA	2cWT-2cKO:8cKO-2cKO	Pramel20	-1.81399	-1.81399	-1.81399	-1.81399	-1.81399	-1.81399	-1.81399	-1.2722	-1.81399	-1.81399	-1.81399	-1.81399	-1.81399	1.93162	-0.941477	5.1118	5.24623	-1.81399	4.09512	3.66226	4.42299	3.43694	6.00234	1.89637	2.86687	-0.862492	-0.862777	1.20135	2.35301	-1.81399	-1.49325	-1.34221	-1.81399	-1.81399	-1.81399	-1.81399	-1.81399
ENSMUSG00000031283	Chrdl1	Chrdl1	83453	-9.52904	2.50201	16.0018	0.000165991	0.0166201	down	NA	2cWT-2cKO:8cKO-2cKO	Chrdl1	-1.81399	-1.81399	-1.81399	-1.81399	-1.81399	-1.81399	-1.81399	-1.81399	-1.81399	-1.81399	-1.81399	-1.81399	-1.81399	-1.81399	3.21158	4.23306	4.31474	5.3364	4.07945	-0.503573	-1.81399	-1.81399	5.20339	3.20541	-1.81399	5.41887	0.279313	1.84939	-1.14955	-1.81399	-1.49325	-1.34221	-0.915587	-1.01655	-1.44755	-1.81399	-1.81399
ENSMUSG00000046743	Fat4	Fat4	329628	-9.31296	2.31446	16.4556	0.000125718	0.0147624	down	NA	2cWT-2cKO:8cKO-2cKO	Fat4	-1.81399	-1.81399	-1.81399	-1.81399	-1.81399	-1.81399	-1.81399	-1.81399	-0.121657	-1.81399	-1.81399	-1.81399	-0.824285	-1.81399	4.55099	4.05903	5.102	-0.466615	3.82126	4.27139	1.47229	4.49926	1.23354	2.62475	-1.20569	-0.550463	3.77522	3.71001	1.6381	-1.81399	-1.81399	0.0765418	-1.81399	-1.81399	-0.912872	-0.13463	-1.81399
ENSMUSG00000044594	Serpinb3a	Serpinb3a	20248	-9.17816	3.33712	22.0246	1.31293e-05	0.00351972	down	NA	2cWT-2cKO:8cKO-2cKO	Serpinb3a	-1.81399	-1.45587	-1.81399	-1.81399	-1.81399	-1.81399	-1.81399	-1.2722	-1.81399	-1.81399	-1.81399	-1.81399	-1.81399	-1.81399	5.84271	4.07654	4.97345	2.84119	4.25716	6.09581	3.78378	-0.518807	1.91552	5.55834	0.042914	6.30925	3.46424	2.95462	-0.696359	-1.81399	-1.81399	-1.81399	-1.81399	-1.81399	-1.81399	-1.81399	-1.81399
ENSMUSG00000047143	Dmrta2	Dmrta2	242620	-9.13688	2.1275	12.2232	0.000860766	0.0416503	down	NA	2cWT-2cKO:8cKO-2cKO	Dmrta2	-1.81399	-1.81399	-1.81399	-1.81399	-1.81399	-1.81399	-1.81399	-1.81399	-1.35775	-1.81399	-1.81399	-1.81399	-1.81399	-1.81399	-1.81399	-1.81399	0.217527	4.54958	-0.422539	-1.81399	-1.81399	4.38968	3.99243	-1.81399	5.51657	-1.81399	-1.81399	4.37792	4.54898	-1.81399	-1.81399	-1.81399	-1.81399	-1.81399	-1.81399	-1.81399	-1.81399
ENSMUSG00000118176	NA	ENSMUSG00000118176	NA	-9.09428	3.26883	18.7475	4.47959e-05	0.00800594	down	NA	2cWT-2cKO:8cKO-2cKO	ENSMUSG00000118176	-1.81399	-1.45587	-1.81399	-1.81399	-1.81399	-1.81399	-1.05064	-1.81399	-1.81399	-1.81399	-1.81399	-1.81399	-1.81399	-1.81399	6.38846	0.380766	4.06846	-0.792753	5.10646	5.99848	4.99218	1.66867	5.07657	5.13134	0.56332	-1.81399	4.84257	2.18643	2.15168	-1.81399	-1.81399	-1.34221	-1.81399	2.09504	-1.81399	-1.81399	-1.81399
ENSMUSG00000070997	1700055D18Rik	1700055D18Rik	73405	-8.9153	1.92747	11.999	0.0009523	0.0432464	down	NA	2cWT-2cKO:8cKO-2cKO	1700055D18Rik	-1.81399	-1.81399	-1.81399	-1.81399	-1.81399	-1.81399	-1.05064	-1.81399	-1.81399	-1.81399	-1.81399	-1.81399	-1.81399	-1.81399	3.86205	3.42841	4.24961	-0.792753	1.611	1.15107	-1.81399	2.69768	-1.81399	-1.81399	-1.81399	5.98861	-1.81399	3.43753	-1.81399	-1.81399	-1.81399	-1.81399	-1.81399	-1.81399	-1.81399	-1.81399	-1.81399
ENSMUSG00000101965	NA	ENSMUSG00000101965	NA	-8.9146	1.92756	12.0696	0.000922437	0.042777	down	NA	2cWT-2cKO:8cKO-2cKO	ENSMUSG00000101965	-1.81399	-1.81399	-1.81399	-1.81399	-1.81399	-1.81399	-1.81399	-1.81399	-1.81399	-1.81399	-1.81399	-1.81399	-1.81399	-1.81399	1.22175	5.17005	-0.567522	5.3827	0.570308	4.1049	-1.81399	-1.81399	-1.81399	3.7305	-1.81399	3.27994	3.08994	-1.81399	-1.81399	-1.00349	-1.81399	-1.81399	-1.81399	-1.81399	-1.81399	-1.81399	-1.81399
ENSMUSG00000096803	Gm6803	Gm6803	627873	-8.91031	1.93684	12.3012	0.000831132	0.0409989	down	NA	2cWT-2cKO:8cKO-2cKO	Gm6803	-1.81399	-1.81399	-1.81399	-1.81399	-1.81399	-1.81399	-1.81399	-1.81399	-1.81399	-1.81399	-1.81399	-1.81399	-1.81399	-1.81399	4.38143	3.1261	3.57264	-1.81399	4.64036	5.19593	-1.81399	-1.81399	-0.57353	3.95322	-1.20569	1.55601	-1.81399	2.99808	-1.14955	-1.81399	-1.23101	-1.81399	-1.81399	-1.81399	-1.81399	-1.81399	0.566096
ENSMUSG00000107086	NA	ENSMUSG00000107086	NA	-8.90981	1.92095	11.7411	0.00101816	0.0452483	down	NA	2cWT-2cKO:8cKO-2cKO	ENSMUSG00000107086	-1.81399	-1.81399	-1.81399	-1.81399	-1.81399	-1.81399	-0.554045	-1.81399	-1.81399	-1.81399	-1.81399	-1.81399	-1.81399	-1.81399	0.767382	-0.532292	-1.81399	-0.792753	3.56402	-1.81399	6.09487	-1.81399	2.18512	-1.81399	-1.81399	5.26295	2.09314	-1.81399	-1.81399	-1.81399	-1.00919	-1.81399	-1.81399	-1.81399	-1.81399	-1.81399	-1.81399
ENSMUSG00000024774	Ankrd22	Ankrd22	52024	-8.88159	1.93746	13.5935	0.000439415	0.0290898	down	NA	2cWT-2cKO:8cKO-2cKO	Ankrd22	-1.81399	-1.81399	-1.81399	-1.81399	-1.81399	-1.81399	-1.81399	-1.81399	-1.81399	-1.81399	-1.81399	-1.81399	-1.81399	-1.31443	1.84501	-0.761965	3.82197	1.39348	0.378687	1.57459	4.11277	-1.81399	3.70864	1.36549	-1.81399	5.57974	2.51776	2.18643	3.69242	-1.81399	-1.49325	-1.81399	-1.81399	2.16423	-1.81399	-1.81399	-1.81399
ENSMUSG00000112514	NA	ENSMUSG00000112514	NA	-8.87745	1.88851	11.4738	0.00120849	0.0491706	down	NA	2cWT-2cKO:8cKO-2cKO	ENSMUSG00000112514	-1.81399	-1.81399	-1.81399	-1.81399	-1.81399	-1.81399	-1.81399	-1.81399	-1.81399	-1.81399	-1.81399	-1.35668	-1.81399	-1.81399	1.5279	-1.81399	-1.81399	-1.81399	3.83066	-1.81399	4.98275	0.792283	5.47047	3.19341	-1.20569	-1.81399	-1.81399	-1.81399	4.52832	-1.81399	-1.81399	-1.81399	-1.81399	-1.81399	-1.81399	-1.81399	-1.81399
ENSMUSG00000059456	Ptk2b	Ptk2b	19229	-8.87408	1.91582	11.9949	0.000906064	0.042777	down	NA	2cWT-2cKO:8cKO-2cKO	Ptk2b	-1.81399	-1.81399	-1.81399	-1.81399	-1.81399	-1.81399	-1.81399	-1.81399	-1.81399	-1.81399	0.245778	-1.81399	-1.81399	-1.81399	-1.46129	-1.3727	4.86651	1.68382	4.75334	-1.81399	-1.81399	-1.81399	4.64152	-0.428858	-1.81399	-1.26118	2.61475	3.58732	4.55919	-1.00349	-1.81399	-1.81399	-1.81399	-0.505962	-1.81399	0.620496	-1.81399
ENSMUSG00000073418	C4b	C4b	12268	-8.87233	1.89722	13.2325	0.000516588	0.0326472	down	NA	2cWT-2cKO:8cKO-2cKO	C4b	-1.81399	-1.81399	-1.81399	-1.81399	-1.81399	-1.81399	-1.81399	-1.2722	-1.35775	-0.229281	-1.81399	-1.81399	-1.81399	-1.81399	4.22616	-0.761965	-1.38837	3.20413	4.16363	3.17636	-1.81399	4.99642	-1.81399	2.71146	-1.81399	-1.26118	-1.26137	4.99166	0.158614	-1.81399	-1.23101	-1.81399	-0.915587	-1.81399	-1.81399	-1.81399	-1.81399
ENSMUSG00000088465	Gm24745	Gm24745	115485756	-8.80467	3.93087	20.9015	1.83267e-05	0.00447952	down	NA	2cWT-2cKO:8cKO-2cKO	Gm24745	-0.796383	-1.81399	-1.81399	-1.81399	-1.81399	-1.81399	-1.81399	-1.81399	-1.81399	-1.81399	-0.773871	-1.81399	-1.81399	-1.81399	1.06764	-1.81399	4.92792	-0.200781	4.58037	6.51113	6.31766	5.86759	5.05991	5.05381	6.02939	6.91568	-1.26137	-1.81399	3.74707	-1.81399	-1.23101	-1.81399	-1.81399	1.25298	-1.81399	-1.81399	-1.81399
ENSMUSG00000094431	NA	ENSMUSG00000094431	NA	-8.77885	1.81238	12.8106	0.000624848	0.0352054	down	NA	2cWT-2cKO:8cKO-2cKO	ENSMUSG00000094431	-1.81399	-1.81399	-1.81399	-1.81399	-1.81399	-1.81399	-1.81399	-1.81399	-1.81399	-1.81399	-1.81399	-1.00997	-1.81399	-1.81399	4.50168	4.9263	2.61823	2.87037	3.97319	3.8424	2.70264	2.07488	-1.81399	3.54463	-1.20569	-1.81399	-1.81399	-0.939318	-1.81399	-0.10847	-1.81399	-1.81399	-1.81399	-1.81399	-1.81399	-1.81399	-1.81399
ENSMUSG00000100340	Gm28923	Gm28923	102640346	-8.69036	1.72495	11.9882	0.000956955	0.0433394	down	NA	2cWT-2cKO:8cKO-2cKO	Gm28923	-1.81399	-1.81399	-1.81399	-1.81399	-1.81399	-1.81399	-1.81399	-1.81399	-1.81399	-1.81399	-1.81399	-1.81399	-0.824285	-1.81399	2.18197	3.93013	4.27892	4.15823	4.94284	0.778753	-1.81399	-1.02569	-1.81399	-0.287612	-0.779127	3.98385	2.51776	-1.81399	-1.81399	-1.81399	-1.81399	-1.81399	-1.81399	-1.81399	-1.81399	-1.81399	-1.81399
ENSMUSG00000099950	9130227L01Rik	9130227L01Rik	329159	-8.68555	1.71563	13.1202	0.000576883	0.0342442	down	NA	2cWT-2cKO:8cKO-2cKO	9130227L01Rik	-1.81399	-1.81399	-1.81399	-1.81399	-1.81399	-1.81399	-1.81399	-1.81399	-1.81399	-1.81399	-1.81399	-1.35668	-1.81399	-1.81399	2.63036	-0.160071	2.31291	3.8712	-0.254201	3.38839	-1.0235	2.50093	-1.81399	3.42657	4.39351	4.20773	-1.81399	-1.31136	4.20303	-1.81399	-1.81399	-1.81399	-1.81399	-1.81399	-1.81399	-1.81399	-1.81399
ENSMUSG00000072511	Hhla1	Hhla1	654498	-8.59273	1.63518	13.1582	0.000567276	0.0341619	down	NA	2cWT-2cKO:8cKO-2cKO	Hhla1	-1.81399	-1.81399	-1.81399	-1.81399	-1.81399	-1.81399	-1.81399	-1.2722	-1.81399	-1.81399	-1.81399	-1.81399	-1.81399	-1.81399	4.70269	-1.03526	1.44584	1.68382	2.02517	1.83505	3.44199	0.152501	-0.57353	4.44327	-1.20569	-1.81399	3.97111	3.62939	1.85266	-1.81399	-1.81399	-1.81399	-1.81399	-1.81399	-1.81399	-1.81399	-1.81399
ENSMUSG00000070821	Olfr1340	Olfr1340	258301	-8.54807	1.58998	11.5255	0.00118035	0.0488092	down	NA	2cWT-2cKO:8cKO-2cKO	Olfr1340	-1.81399	-1.81399	-1.81399	-1.81399	-1.81399	-1.81399	-1.05064	-1.81399	-1.81399	-1.81399	-1.81399	-1.81399	-1.81399	-1.81399	-1.1781	-1.81399	1.02933	-1.81399	-1.40834	2.27223	4.45063	3.22996	3.79174	3.10649	-1.81399	4.82299	-1.26137	-1.81399	3.6548	-1.81399	-1.81399	-1.81399	-1.81399	-1.81399	-1.81399	-1.81399	-1.81399
ENSMUSG00000049670	Morn4	Morn4	226123	-8.504	1.57217	12.4547	0.000734371	0.0387491	down	NA	2cWT-2cKO:8cKO-2cKO	Morn4	-1.81399	-1.81399	-1.81399	-1.81399	-1.81399	-1.81399	-1.81399	-1.81399	-1.81399	-1.81399	-1.81399	0.907316	-1.81399	-1.81399	-1.81399	3.28516	2.98124	-1.21483	1.21158	0.976891	-0.140895	3.54311	0.77018	1.6726	-1.81399	5.28768	0.429066	1.47181	4.1088	-1.81399	-1.81399	-1.81399	-1.81399	-1.81399	-1.44755	-1.81399	-1.81399
ENSMUSG00000096283	Gm6176	Gm6176	620736	-8.48604	2.67691	14.4619	0.000286254	0.023201	down	NA	2cWT-2cKO:8cKO-2cKO	Gm6176	-1.81399	-1.45587	-1.81399	-1.81399	-1.81399	-1.81399	-1.81399	-1.2722	-1.81399	-1.81399	-1.81399	-1.81399	-1.81399	-1.81399	5.12034	3.77791	3.27102	-1.81399	3.33236	4.50864	5.10956	-1.81399	4.46711	3.4966	5.57642	-0.550463	-1.81399	3.58732	0.534996	-1.81399	2.57265	-1.81399	-1.81399	-1.81399	-1.81399	0.620496	-1.81399
ENSMUSG00000031561	Tenm3	Tenm3	23965	-8.45933	1.56992	12.4086	0.000749946	0.038844	down	NA	2cWT-2cKO:8cKO-2cKO	Tenm3	-1.81399	-1.81399	-1.81399	-1.81399	-1.81399	-1.81399	-1.81399	-1.81399	-1.81399	-1.81399	1.57937	-1.81399	-0.824285	-1.31443	2.39139	4.54749	3.94591	-0.792753	3.04015	1.09532	-1.81399	2.07488	1.86525	3.54463	3.64563	-0.294066	2.89775	0.95898	-1.81399	-1.00349	-1.81399	-1.81399	-0.915587	-1.81399	-0.0856931	-1.81399	-1.81399
ENSMUSG00000071716	Apol7e	Apol7e	666348	-8.3249	2.86632	15.9727	0.00015816	0.0165548	down	NA	2cWT-2cKO:8cKO-2cKO	Apol7e	-1.81399	-1.81399	-1.12177	-1.81399	-1.81399	-1.81399	-1.81399	-1.81399	-1.81399	-1.81399	-1.81399	-1.81399	-1.81399	-1.81399	2.88231	5.39257	-0.200979	0.217749	2.69405	5.27961	5.31905	1.66867	5.43213	0.516538	2.60918	2.34061	4.63472	-0.398674	5.25607	0.836027	-1.81399	-1.81399	-0.366145	-1.81399	-0.362437	-1.81399	-1.81399
ENSMUSG00000050087	NA	ENSMUSG00000050087	NA	-8.20679	2.34925	13.3677	0.000468091	0.0302519	down	NA	2cWT-2cKO:8cKO-2cKO	ENSMUSG00000050087	-1.81399	-1.45587	-1.81399	-1.81399	-1.81399	-1.81399	-1.81399	-1.81399	-1.81399	-1.81399	-1.81399	-1.35668	-1.81399	-1.81399	1.5279	3.3728	2.47363	-1.81399	2.51918	-1.43989	6.23263	-1.81399	-1.27372	0.0682993	4.85413	-1.81399	4.72438	-1.31136	4.50737	-1.81399	-1.00919	-1.81399	-1.81399	-1.81399	-1.81399	-1.81399	-1.81399
ENSMUSG00000054939	Zfp174	Zfp174	385674	-7.26878	2.78873	12.1464	0.000818445	0.0407287	down	NA	2cWT-2cKO:8cKO-2cKO	Zfp174	-1.81399	-1.81399	-1.12177	-1.81399	-1.81399	-0.803809	-1.81399	-1.81399	-1.81399	0.507634	-0.17578	-1.81399	-0.242772	3.0508	4.85181	1.39229	0.217527	5.65	2.77413	3.88413	-1.81399	2.69768	3.73687	4.52694	3.36148	2.99761	0.908691	5.59017	4.22886	-1.81399	-1.81399	1.37554	-1.81399	-1.81399	-1.81399	-1.81399	-1.81399
ENSMUSG00000010461	Eya4	Eya4	14051	-7.24665	2.449	13.0576	0.000538901	0.0336732	down	NA	2cWT-2cKO:8cKO-2cKO	Eya4	-1.21727	-1.81399	-1.12177	-1.81399	-1.81399	-1.81399	-1.81399	-1.81399	-1.81399	-1.81399	-1.81399	-1.81399	-1.81399	-1.31443	4.03837	3.25472	3.8995	5.8016	1.32227	3.79068	0.613069	-1.81399	5.14138	2.88564	4.33073	-1.26118	3.68876	1.125	-1.81399	-1.81399	-1.49325	-1.81399	-0.915587	-1.81399	-1.81399	-1.81399	-1.81399
ENSMUSG00000027748	Trpc4	Trpc4	22066	-7.22427	2.9037	12.5976	0.000664964	0.0368412	down	NA	2cWT-2cKO:8cKO-2cKO	Trpc4	-1.21727	-1.45587	-1.81399	-1.81399	-1.81399	-0.803809	-1.81399	-1.2722	2.45102	-1.81399	-1.81399	-1.81399	-1.81399	-1.81399	3.90819	4.54119	5.81513	0.217749	3.64079	4.69368	5.59159	0.608847	3.93266	5.13134	-1.20569	4.24862	-0.862777	-1.81399	2.72381	-1.81399	-1.49325	-0.987281	-1.81399	-1.81399	-1.81399	-0.13463	0.566096
ENSMUSG00000113348	NA	ENSMUSG00000113348	NA	-7.11656	2.8935	11.634	0.00103809	0.0455726	down	NA	2cWT-2cKO:8cKO-2cKO	ENSMUSG00000113348	-1.81399	-1.81399	-0.304395	-1.81399	-1.81399	-1.81399	-1.81399	-1.81399	-1.01165	-0.229281	-1.81399	-1.81399	-1.81399	-1.31443	-0.738253	2.78639	2.77043	4.59399	4.91662	5.90225	-1.81399	-1.81399	5.90927	3.98141	5.26562	0.909192	1.4888	2.88688	-0.352013	-1.00349	-1.81399	-1.81399	-1.81399	-1.81399	3.20925	-1.81399	-1.81399
ENSMUSG00000067297	Ifit1bl2	Ifit1bl2	112419	-6.95068	3.13769	11.3799	0.00116885	0.0485687	down	NA	2cWT-2cKO:8cKO-2cKO	Ifit1bl2	-0.796383	-1.81399	-1.81399	0.109239	-1.81399	-1.81399	-1.81399	4.04331	-1.81399	-0.229281	-1.81399	-1.81399	-1.81399	-1.81399	5.29547	4.6908	6.24639	2.61851	5.98955	4.57129	-1.0235	2.27304	1.64458	3.88771	2.05745	4.80938	2.30173	0.555603	-1.81399	-0.487658	0.766006	-1.81399	-0.366145	-1.81399	-1.81399	-0.13463	-1.81399
ENSMUSG00000092035	Peg10	Peg10	170676	-6.94801	3.07372	12.2409	0.000783543	0.0398176	down	NA	2cWT-2cKO:8cKO-2cKO	Peg10	-1.81399	-1.81399	-1.81399	0.109239	-1.81399	-0.803809	-1.81399	-1.2722	-0.732722	0.507634	2.84691	-1.81399	3.86618	1.97546	3.6062	2.2204	3.91824	6.05454	5.22162	4.44315	-1.81399	-0.144454	1.52014	3.83461	4.59393	5.09934	3.89592	3.62939	3.42831	-1.81399	-1.81399	-1.81399	-1.81399	1.77939	-0.912872	-0.13463	-1.81399
ENSMUSG00000107906	Eif4a3l2	Eif4a3l2	434080	-6.92487	3.28041	16.0565	0.000141744	0.0156022	down	NA	2cWT-2cKO:8cKO-2cKO	Eif4a3l2	-1.81399	-0.72516	-1.81399	-1.81399	-1.81399	-0.215469	-1.05064	-0.879239	-0.499085	0.507634	-0.773871	-1.00997	0.170539	-1.31443	5.0637	3.20782	6.05425	4.90725	4.68248	5.87767	-0.140895	-1.81399	4.86902	4.32175	3.15956	-1.81399	2.89775	5.18739	4.02283	-0.487658	-0.358349	-0.0824149	-1.81399	-1.01655	0.521833	-0.13463	-1.81399
ENSMUSG00000054272	Zscan4c	Zscan4c	245109	-6.53682	3.37272	12.5612	0.000676176	0.0372143	down	NA	2cWT-2cKO:8cKO-2cKO	Zscan4c	-1.81399	-1.45587	-1.81399	0.905285	-1.81399	-0.803809	-1.81399	-1.81399	-1.81399	-1.81399	-1.81399	-1.81399	-1.81399	-0.649622	5.07723	4.05903	4.51891	-1.81399	6.79444	6.44435	0.156363	-1.81399	4.42434	4.78461	1.41734	-0.862492	-0.0768469	4.5263	4.50737	-0.487658	-1.81399	-1.34221	-1.81399	-1.81399	-1.81399	-1.81399	-1.81399
ENSMUSG00000048706	Lurap1l	Lurap1l	52829	-6.42353	3.11876	12.9222	0.000573201	0.034212	down	NA	2cWT-2cKO:8cKO-2cKO	Lurap1l	-1.21727	-1.81399	-0.304395	0.109239	-1.81399	-1.81399	-1.81399	-1.81399	-1.81399	-0.229281	-1.81399	-1.81399	-1.81399	-1.81399	2.78674	3.09207	1.63904	3.9956	6.08291	5.21241	2.916	4.07264	4.39806	3.05436	6.09382	5.14337	-0.294451	1.64585	3.07658	0.999652	-0.117675	-1.81399	-1.81399	-1.81399	-1.81399	-1.81399	-1.81399
ENSMUSG00000039234	Sec24d	Sec24d	69608	-5.98536	3.88964	15.1842	0.00020779	0.0188923	down	NA	2cWT-2cKO:8cKO-2cKO	Sec24d	1.12328	-0.545695	-1.81399	0.109239	-1.81399	-1.81399	-1.81399	1.5881	-1.01165	-1.81399	-0.773871	-1.81399	-1.81399	0.293787	6.30469	5.18224	5.91184	4.57639	5.03918	4.30864	-1.81399	6.21145	5.75905	1.56495	5.7663	3.54907	-0.294451	6.27965	1.97979	-1.00349	-1.49325	-1.81399	-0.915587	-1.01655	-0.912872	-1.81399	-1.81399
ENSMUSG00000094973	Eif4a3l1	Eif4a3l1	668137	-5.1173	4.40752	12.8056	0.000604564	0.0345308	down	NA	2cWT-2cKO:8cKO-2cKO	Eif4a3l1	-1.81399	1.92986	-1.12177	1.79137	-1.81399	0.7879	-1.81399	-0.570722	-1.01165	3.47104	-1.81399	-1.81399	-1.81399	-1.31443	3.77342	5.9649	5.23879	2.84119	7.07693	7.12362	4.0599	3.7787	7.17838	4.04956	3.77701	0.279765	4.26805	6.44188	4.58942	-1.00349	2.30967	3.51041	-0.366145	-0.505962	3.03202	-1.81399	-1.81399
ENSMUSG00000058976	Usp17lc	Usp17lc	13532	-5.06047	6.33534	18.7081	0.000101743	0.013406	down	NA	2cWT-2cKO:8cKO-2cKO	Usp17lc	2.46712	2.10131	2.46941	0.109239	1.72925	3.93384	-1.05064	-1.81399	-1.01165	1.3556	-0.773871	4.24442	-0.824285	-1.31443	7.15994	6.93666	7.63721	6.50417	7.88903	8.69172	7.98677	5.29882	7.50103	7.6122	8.01555	6.51178	7.33364	8.0677	7.62028	0.836027	-1.00919	-0.987281	4.77158	0.626453	5.31325	0.620496	0.566096
ENSMUSG00000022180	Slc7a8	Slc7a8	50934	-4.91137	4.88748	12.9616	0.00060328	0.0345308	down	NA	2cWT-2cKO:8cKO-2cKO	Slc7a8	0.800197	0.221383	2.90006	1.79137	-1.81399	-0.215469	3.99587	3.94959	-1.35775	-1.81399	-0.773871	-1.35668	-1.81399	-1.31443	5.58308	5.24552	5.50684	7.08451	4.19306	6.19365	1.57634	7.63657	4.45015	5.60891	5.50714	7.7358	6.26948	4.17513	5.3649	-1.81399	-0.495635	3.97141	-1.81399	-1.81399	-1.81399	-0.13463	-1.81399
ENSMUSG00000042607	Asb4	Asb4	65255	-4.25845	4.90359	11.3118	0.00123345	0.049746	down	NA	2cWT-2cKO:8cKO-2cKO	Asb4	-0.2056	-1.45587	3.98829	2.08939	-1.81399	-1.81399	-1.81399	-1.81399	-1.35775	-0.229281	-0.773871	4.37554	-0.824285	-1.81399	5.87598	6.25171	7.00696	6.79792	6.63603	6.30537	4.22909	5.72259	5.6445	6.38225	6.18241	5.71719	4.66523	5.38858	5.34142	-1.00349	2.44715	1.2477	5.4602	-1.01655	-0.362437	3.74856	0.566096
ENSMUSG00000035273	Hpse	Hpse	15442	-3.85227	5.14088	11.368	0.00119226	0.0488092	down	NA	2cWT-2cKO:8cKO-2cKO	Hpse	2.89208	2.37084	-1.81399	1.79137	-1.81399	4.0886	-1.81399	2.45139	-0.732722	0.993039	-1.81399	0.907316	3.12021	4.40013	4.45581	6.63962	7.67628	4.71153	7.10623	4.84925	4.83323	7.46653	5.19832	6.12547	5.59435	7.26117	5.58714	4.69424	6.13933	-1.00349	1.64002	-0.261079	5.35152	-1.01655	2.70813	-1.81399	-1.81399
ENSMUSG00000045007	Tubg2	Tubg2	103768	-2.59483	6.73431	14.5737	0.000318643	0.0240236	down	NA	2cWT-2cKO:8cKO-2cKO	Tubg2	6.18377	5.19945	2.04865	3.51147	6.1293	4.86431	-0.554045	4.23426	5.1884	4.56067	5.84972	4.21999	6.71999	1.52275	8.25986	8.39363	8.22031	7.29956	7.9847	8.55049	5.91306	7.33044	7.58594	8.36992	6.78611	8.54682	7.03092	6.67061	7.45503	0.836027	3.02575	1.88549	1.17005	5.24242	3.36706	1.48047	4.27963
ENSMUSG00000039307	Hexdc	Hexdc	238023	-2.37618	6.19355	12.4641	0.000707018	0.0378158	down	NA	2cWT-2cKO:8cKO-2cKO	Hexdc	5.37558	5.40986	4.37672	5.29289	4.57142	1.52621	2.39045	-0.316699	0.534132	2.27311	6.21322	3.45919	3.55816	1.1159	7.36341	7.58348	7.59122	6.25592	7.11106	7.68565	6.17164	6.83301	6.9457	7.35442	7.51572	7.47441	6.54645	7.39449	7.05753	6.38314	3.11098	5.16705	3.33819	4.09389	5.4471	4.10433	3.3006
ENSMUSG00000071076	Jund	Jund	16478	-2.16732	7.11149	16.5181	0.000115986	0.01428	down	NA	2cWT-2cKO:8cKO-2cKO	Jund	6.06006	5.17085	4.93457	6.80064	5.51575	3.87833	4.59016	5.43696	5.63788	4.98005	7.36042	6.16977	7.54692	7.06704	7.77903	6.7474	6.54215	8.34902	6.79684	5.23838	8.87938	7.91887	6.83579	8.29889	7.79785	5.13249	8.44875	8.47147	8.64644	5.89894	7.13135	6.71899	7.10738	5.45754	6.85897	2.01557	6.60243
ENSMUSG00000021962	Dcp1a	Dcp1a	75901	-2.02192	8.34538	24.9233	3.66979e-06	0.00184835	down	NA	2cWT-2cKO:8cKO-2cKO	Dcp1a	7.72777	6.61065	7.67706	7.23265	6.91615	7.38119	6.68415	6.19247	5.764	7.68348	4.81893	5.517	6.37487	6.45486	8.63994	9.65161	10.9316	9.167	9.86162	10.045	7.74025	9.39605	8.74244	9.23397	9.1893	9.18704	8.20251	8.23483	8.02592	6.49023	5.60004	4.34388	7.33301	5.40133	6.51164	7.3777	6.91995
ENSMUSG00000031601	Cnot7	Cnot7	18983	-1.90137	8.17879	15.3023	0.00026691	0.0227503	down	NA	2cWT-2cKO:8cKO-2cKO	Cnot7	7.56525	7.78769	7.96688	6.09993	4.01774	7.49629	1.30233	5.98077	7.5526	6.32006	4.56797	6.98317	5.90691	5.49573	9.58779	9.25686	9.73945	9.5288	9.8186	9.98839	8.73649	8.59677	8.68789	9.21444	8.79305	8.87976	8.52091	8.44276	8.29329	5.01026	6.26089	6.18987	7.08144	6.36006	5.94955	6.20134	3.74863
ENSMUSG00000038024	Dennd4c	Dennd4c	329877	-1.80067	7.369	15.0565	0.00021985	0.0195408	down	NA	2cWT-2cKO:8cKO-2cKO	Dennd4c	5.51541	7.20444	5.85114	6.66042	6.77354	5.76078	5.3203	4.2831	6.73321	6.15717	5.97904	4.53586	5.11971	5.31134	8.3318	8.56894	8.45947	8.13577	8.75359	8.45265	7.76936	8.50204	8.08798	8.33927	6.8986	8.81232	8.26548	7.41467	7.10189	6.62795	6.03806	5.79182	4.18763	7.41547	8.13682	3.07534	4.59733
ENSMUSG00000038023	Atp6v0a2	Atp6v0a2	21871	-1.76396	7.05866	12.1957	0.00080005	0.0401741	down	NA	2cWT-2cKO:8cKO-2cKO	Atp6v0a2	6.07884	6.59638	5.58252	2.08939	4.93526	7.62412	1.18137	5.38421	5.64704	5.77809	5.28694	5.17122	5.42287	3.36279	7.94961	7.76452	7.60286	8.21326	7.58693	7.94372	7.57581	7.85717	8.27047	8.4168	7.9387	8.35126	8.12711	8.12272	7.48481	4.66493	4.41853	5.97708	5.47621	6.48364	6.26861	6.75545	1.95335
ENSMUSG00000095057	Zfp353-ps	Zfp353-ps	234203	-4.84233	5.37678	21.7769	1.28305e-05	0.00351459	down	NA	2cWT-2cKO:8cWT-2cWT:8cKO-2cKO	Zfp353-ps	-0.796383	2.61683	-0.304395	0.905285	2.666	2.79042	-1.81399	-0.316699	-1.81399	0.507634	-1.81399	-1.35668	-0.824285	-1.81399	5.50766	6.13331	7.9415	6.00606	7.68017	6.71102	4.40896	0.792283	7.74904	7.10342	6.06197	7.76075	2.41379	6.49593	3.74707	-1.81399	-1.81399	-1.81399	-0.366145	0.415619	-1.44755	-0.13463	-1.81399
ENSMUSG00000004032	Gstm5	Gstm5	14866	-4.43278	4.41053	12.1099	0.000832379	0.0409989	down	NA	2cWT-2cKO:8cWT-2cWT:8cKO-2cKO	Gstm5	-1.81399	0.719525	-1.12177	-1.81399	-1.81399	3.6321	-1.81399	-0.316699	-1.35775	-0.229281	-1.81399	-1.81399	-0.824285	-1.31443	4.60335	6.94264	7.13168	2.22558	5.05929	7.37845	3.92843	6.07208	5.37039	5.92598	2.05745	5.68776	1.90141	3.6155	3.81685	-1.81399	-1.81399	-0.987281	-1.81399	0.168613	-1.81399	-1.81399	-1.81399
ENSMUSG00000090891	D6Ertd527e	D6Ertd527e	52372	-2.37884	9.31786	14.4309	0.000574282	0.034212	down	NA	2cWT-2cKO:8cWT-2cWT:8cKO-2cKO	D6Ertd527e	7.91009	7.71582	7.76912	7.82935	8.78814	8.26156	4.06588	6.54065	5.38382	5.82226	2.72109	4.24442	5.33541	5.30277	11.1071	10.2696	12.204	9.7295	11.7607	11.4921	8.62413	8.66891	9.2269	10.1425	9.03787	10.568	9.01752	8.75844	8.9111	5.03877	2.11118	5.52166	6.72384	4.74044	3.70396	5.26682	4.36585
ENSMUSG00000003134	Tbc1d8	Tbc1d8	54610	-2.328	6.38202	12.8292	0.000598079	0.0345308	down	NA	2cWT-2cKO:8cWT-2cWT:8cKO-2cKO	Tbc1d8	6.09738	5.74986	6.2764	0.905285	3.54241	2.29258	0.108105	2.48518	2.53241	0.993039	4.12181	-0.496733	2.07362	3.73845	7.75135	7.09431	7.17811	7.17646	7.21872	8.30647	7.02448	7.02847	7.97029	7.85483	6.12499	8.35243	7.40882	7.23789	7.47135	2.49675	2.50228	4.67113	3.8616	3.37285	0.0350224	2.71136	0.566096
ENSMUSG00000025241	Fyco1	Fyco1	17281	-1.94566	8.50804	27.6671	1.27655e-06	0.00106088	down	NA	2cWT-2cKO:8cWT-2cWT:8cKO-2cKO	Fyco1	8.09442	8.19793	7.66963	6.35918	7.58499	7.03915	6.49088	5.7844	3.36936	6.35054	4.37257	5.95961	3.94708	5.83604	9.635	10.0381	9.78979	9.31992	10.3349	10.1931	8.93304	9.22366	8.91298	9.3473	9.39731	10.1302	9.21863	8.67889	8.88799	6.52424	6.0098	6.41673	6.98398	6.04856	6.27169	5.19462	4.59733
ENSMUSG00000008429	Herpud2	Herpud2	80517	-1.79843	7.774	12.3529	0.000883314	0.0423646	down	NA	2cWT-2cKO:8cWT-2cWT:8cKO-2cKO	Herpud2	7.51672	7.54806	7.25403	6.1492	6.74325	6.78368	0.108105	3.8099	3.83273	3.04362	1.4265	4.33061	0.170539	1.58066	8.95177	8.32661	9.28472	9.29828	9.07168	9.57532	8.33435	8.57503	9.31499	8.92665	8.40142	9.18111	8.16697	8.76946	7.7385	3.4026	1.60687	4.63964	4.90771	3.21875	3.78366	6.189	1.42041
ENSMUSG00000039108	Lsm14b	Lsm14b	241846	-1.64014	8.21087	14.046	0.000389819	0.0268341	down	NA	2cWT-2cKO:8cWT-2cWT:8cKO-2cKO	Lsm14b	7.63881	7.41417	8.09991	5.07224	8.43394	6.61563	4.81012	7.26333	5.05703	5.70133	2.58323	4.59405	4.18803	4.90401	9.44608	8.68013	9.11711	9.12183	8.8963	10.0296	7.67583	9.17701	9.06548	9.3101	8.41409	10.4103	8.62304	8.87047	8.88799	5.40275	6.10043	6.7008	6.80216	6.45286	5.26161	6.2964	7.8451
ENSMUSG00000034761	Map4k5	Map4k5	399510	-1.34173	8.49757	13.8531	0.000375978	0.0265697	down	NA	2cWT-2cKO:8cWT-2cWT:8cKO-2cKO	Map4k5	8.52248	7.91863	8.46491	7.42495	8.1482	7.24792	6.69524	6.46857	6.21188	5.70133	7.18982	7.28152	6.14271	4.9153	9.72207	9.50858	9.31068	9.60021	9.2748	10.1492	8.86083	9.08662	9.57508	9.44985	8.76563	9.55292	8.43332	9.16224	9.30862	7.97469	5.94826	6.11399	6.11035	7.89793	7.58116	3.81428	7.88214
ENSMUSG00000035696	Rnf38	Rnf38	73469	-1.24728	8.78939	12.3716	0.00073772	0.0388027	down	NA	2cWT-2cKO:8cWT-2cWT:8cKO-2cKO	Rnf38	8.77749	8.93371	8.61228	7.75704	9.05185	6.92393	5.99899	5.72199	6.38804	6.14563	5.42449	6.03623	5.11971	6.08142	9.9494	10.0208	10.4854	10.0813	10.4489	10.7196	8.79022	9.21716	9.36982	9.62884	8.30945	10.2126	8.91611	8.7265	8.80992	6.56401	7.56484	6.71748	6.32454	5.93931	7.00468	3.45087	5.65881
ENSMUSG00000032050	Rdx	Rdx	19684	-1.22816	8.05898	11.5073	0.00110125	0.0470566	down	NA	2cWT-2cKO:8cWT-2cWT:8cKO-2cKO	Rdx	6.95225	8.47763	7.43136	6.9095	7.80627	7.97777	6.698	6.74101	7.1285	4.48941	4.37257	4.34574	6.05417	6.58612	9.80635	9.4844	8.83888	8.48553	9.19204	9.56076	8.04801	8.24514	9.14631	8.74177	8.72552	9.2466	8.05765	8.11842	8.66962	6.8929	6.58201	5.92055	6.45149	5.95404	6.06215	6.55856	7.1439
ENSMUSG00000040850	Psme4	Psme4	103554	-1.13094	8.69041	11.8947	0.00091961	0.042777	down	NA	2cWT-2cKO:8cWT-2cWT:8cKO-2cKO	Psme4	8.76547	8.60482	8.84491	5.99605	8.9136	8.3135	4.44005	5.6268	5.5848	6.83309	6.41971	7.08136	5.06034	5.72487	9.72731	9.87474	10.1348	9.76586	9.89251	10.0289	8.78752	8.99722	9.5487	9.7667	9.85782	9.61287	8.82065	8.99468	9.53222	6.76792	6.21487	5.97708	6.47957	6.31893	7.08989	6.43865	7.60031
ENSMUSG00000046324	Ermp1	Ermp1	226090	-1.00307	10.1041	15.7337	0.00016321	0.0165548	down	NA	2cWT-2cKO:8cWT-2cWT:8cKO-2cKO	Ermp1	10.183	9.5714	10.2845	9.80512	10.628	9.71804	6.49088	7.34956	7.08308	5.21905	6.51284	7.05973	6.32529	5.8211	10.9925	11.0658	11.1536	11.4687	10.9313	10.9952	10.8058	11.2953	10.568	11.1256	10.7636	11.8883	10.8241	10.9245	10.8791	6.74214	6.05198	5.77163	7.1278	6.85718	7.35053	7.06317	7.24973
ENSMUSG00000078511	Pramel16	Pramel16	329984	-10.6165	3.70932	26.5587	2.18719e-06	0.00137929	down	NA	2cWT-2cKO:8cWT-8cKO	Pramel16	-1.81399	-1.81399	-1.81399	-1.81399	-1.81399	-1.81399	-1.81399	-1.81399	-1.35775	-1.81399	-1.81399	-1.81399	-1.81399	-1.31443	4.72004	1.9434	4.61971	5.50403	5.60773	5.94822	2.6076	5.50994	3.8575	3.90988	4.27624	3.56534	4.66523	4.86241	5.493	-0.487658	-1.81399	1.75049	-1.81399	5.51164	1.87038	-1.81399	0.566096
ENSMUSG00000096014	Sox1	Sox1	20664	-9.29076	2.42227	12.8466	0.00061474	0.0348723	down	NA	2cWT-2cKO:8cWT-8cKO	Sox1	-1.81399	-1.81399	-1.81399	-1.81399	-1.81399	-1.81399	-1.81399	-1.81399	-1.81399	-1.81399	-1.81399	-1.81399	-1.81399	-1.31443	-1.1781	-1.81399	-0.372641	-1.21483	-1.40834	-1.1431	-1.81399	3.86312	4.95566	4.02945	6.44451	3.51596	0.564726	2.49021	-1.14955	-1.81399	-1.49325	-1.81399	4.31777	-1.81399	-1.81399	-1.81399	-1.81399
ENSMUSG00000046167	Gldn	Gldn	235379	-9.26744	2.43605	15.1936	0.000216862	0.0193789	down	NA	2cWT-2cKO:8cWT-8cKO	Gldn	-1.81399	-1.81399	-1.81399	-1.81399	-1.81399	-1.81399	-1.81399	-1.81399	-1.81399	-1.81399	-1.81399	-1.81399	-1.81399	-1.31443	4.73719	2.5809	3.77132	3.58471	3.35857	3.42278	2.99323	-1.81399	-1.81399	3.61829	-1.81399	4.20773	-1.81399	4.59867	4.63842	-1.81399	1.90842	1.88549	3.30271	2.97096	-1.81399	-1.81399	-1.81399
ENSMUSG00000110462	NA	ENSMUSG00000110462	NA	-8.94786	2.38031	14.6823	0.000271253	0.0230026	down	NA	2cWT-2cKO:8cWT-8cKO	ENSMUSG00000110462	-1.81399	-1.81399	-1.81399	-1.81399	-1.81399	-1.81399	-1.05064	-1.81399	-1.35775	-1.81399	-1.81399	-1.81399	-1.81399	-1.81399	2.36956	3.94926	2.31291	4.08544	1.15288	1.93373	3.78378	3.68902	3.13929	3.64497	-1.81399	4.1223	3.33736	3.43753	-1.14955	5.00063	-1.81399	4.10654	-0.915587	-1.01655	-1.81399	-1.81399	-1.81399
ENSMUSG00000113688	NA	ENSMUSG00000113688	NA	-7.87272	2.62714	12.3451	0.000746781	0.038844	down	NA	2cWT-2cKO:8cWT-8cKO	ENSMUSG00000113688	-1.81399	-1.45587	-1.81399	-1.81399	-1.81399	-1.81399	-1.81399	-1.81399	-1.81399	-1.81399	-1.81399	-1.81399	-0.824285	-1.81399	4.65388	3.09207	-0.200979	1.68382	0.272402	0.976891	5.31153	1.66867	-1.81399	3.64497	-1.81399	0.429532	4.57169	4.31057	2.0394	-1.00349	-1.49325	-1.81399	-1.81399	3.37285	6.00603	-1.81399	-1.81399
ENSMUSG00000104338	NA	ENSMUSG00000104338	NA	-7.58362	2.76199	12.2369	0.000784989	0.0398176	down	NA	2cWT-2cKO:8cWT-8cKO	ENSMUSG00000104338	-1.81399	-1.1692	-1.81399	-1.81399	-1.81399	-1.81399	-1.81399	-1.81399	-1.81399	-1.81399	-1.81399	-1.35668	-1.81399	-0.944065	4.03144	4.4833	5.37395	-1.81399	3.59742	-0.062008	5.00156	-1.02569	1.52014	3.67979	-1.81399	-1.81399	4.58771	-1.81399	3.38301	-1.81399	2.03844	-0.261079	5.69044	0.973465	3.13014	-1.81399	-1.81399
ENSMUSG00000115920	NA	ENSMUSG00000115920	NA	-5.93236	3.11604	12.2435	0.000782572	0.0398176	down	NA	2cWT-2cKO:8cWT-8cKO	ENSMUSG00000115920	0.212339	-0.930165	-1.81399	-1.81399	-1.81399	-0.803809	-1.05064	-1.2722	-0.499085	-1.81399	-0.773871	-0.496733	-1.81399	-1.31443	4.63571	2.15597	3.11726	2.71818	-1.81399	3.48918	5.26557	5.18042	-0.319839	4.89616	4.17266	5.21217	1.84921	5.41687	1.55885	-1.81399	1.64002	4.95316	0.341761	2.62326	-0.523652	0.620496	1.42041
ENSMUSG00000047193	Dync2h1	Dync2h1	110350	-4.89331	6.46458	58.9523	4.43666e-11	3.68709e-07	down	NA	2cWT-2cKO:8cWT-8cKO	Dync2h1	2.80453	3.37587	-0.304395	3.29506	0.847977	0.7879	1.87042	2.98774	2.65863	0.993039	4.04512	1.99895	2.41437	2.62491	8.15851	7.11881	7.26581	7.78079	6.94799	5.71377	6.11661	7.37784	6.80111	7.44703	7.41214	6.97018	7.08411	7.00344	7.47135	7.21985	6.64869	7.792	5.93023	7.1515	6.04608	6.70437	6.72167
ENSMUSG00000113533	NA	ENSMUSG00000113533	NA	-4.65955	4.17146	13.8051	0.000384179	0.0268341	down	NA	2cWT-2cKO:8cWT-8cKO	ENSMUSG00000113533	0.67414	-0.242423	-0.655954	2.08939	1.35488	-0.803809	-1.05064	-1.81399	-0.732722	-0.229281	-1.81399	-1.35668	-0.242772	-1.81399	5.68378	6.15407	4.84707	5.27225	2.81256	3.97961	5.98099	4.38968	5.16235	5.40027	4.90529	3.74755	5.31142	2.02773	5.96587	2.05082	3.91487	4.646	4.57737	5.52485	3.50931	-1.81399	-1.81399
ENSMUSG00000022707	Gbe1	Gbe1	74185	-4.29606	5.41157	22.2851	1.04493e-05	0.00329077	down	NA	2cWT-2cKO:8cWT-8cKO	Gbe1	2.61168	2.04639	0.417012	3.29506	-1.81399	1.52621	3.50996	4.30219	1.9565	-1.81399	2.58323	-0.730648	-0.242772	4.26537	6.47404	5.99052	5.88112	7.12442	6.45654	4.54552	5.33397	7.15107	5.43213	6.82584	6.48591	4.6353	5.66846	6.0434	6.44226	5.50845	5.53102	6.24532	6.69675	4.03968	5.55198	4.79963	2.34166
ENSMUSG00000027014	Cwc22	Cwc22	80744	-2.55046	7.51041	34.2025	1.16311e-07	0.000175747	down	NA	2cWT-2cKO:8cWT-8cKO	Cwc22	5.83922	6.03368	6.2097	6.35918	3.22925	4.63233	6.16372	6.22032	5.09771	5.4048	5.00591	5.517	5.96634	5.90566	8.27241	8.66067	8.18639	7.72497	8.68306	8.45404	8.2747	6.28979	8.97874	7.44893	8.78332	8.28401	7.77772	8.03677	8.19024	7.4845	7.30353	6.9119	7.93534	8.23392	8.09881	4.34571	7.11928
ENSMUSG00000082454	Gm12183	Gm12183	432554	-2.38189	6.19269	15.2747	0.000199661	0.0183346	down	NA	2cWT-2cKO:8cWT-8cKO	Gm12183	3.38997	5.03993	4.68244	1.79137	5.51575	3.6977	4.28722	3.74164	4.47821	2.70921	3.96412	2.42655	5.64928	3.72567	6.04556	6.99307	7.00696	5.5408	7.61574	7.86307	6.89463	3.43694	6.56759	7.68471	6.29083	6.39142	6.90713	6.48261	6.53577	6.99826	7.19965	5.45085	4.46949	7.24229	7.3167	4.9534	5.72556
ENSMUSG00000061859	Patj	Patj	12695	-1.48736	7.26322	16.2301	0.000131431	0.01493	down	NA	2cWT-2cKO:8cWT-8cKO	Patj	6.96071	6.61655	6.60961	5.4321	5.16593	5.64081	6.33301	6.24272	5.6712	4.84384	5.6484	5.55656	5.70461	5.78152	7.5202	7.6904	7.8902	7.22809	7.31306	7.41307	8.22553	7.64554	7.27662	7.59005	8.13672	8.17023	7.53809	8.03286	7.49815	8.36075	7.31641	7.92202	7.047	6.51709	7.61726	8.04804	7.8224
ENSMUSG00000064368	ND6	ND6	17722	-1.1238	9.96958	19.7706	2.9214e-05	0.00599464	down	NA	2cWT-2cKO:8cWT-8cKO	ND6	8.69773	9.133	8.83	9.34603	9.25338	9.4554	8.60456	8.50579	9.74894	8.46756	8.39309	9.60507	7.88304	9.0108	10.1722	10.2424	9.51423	10.5182	10.2709	9.84507	10.5401	10.5392	10.0815	10.0278	9.60251	11.2613	10.2072	10.3419	9.89665	10.1739	9.99082	10.935	10.3602	10.8068	10.6759	10.1976	10.3815
ENSMUSG00000085973	NA	ENSMUSG00000085973	NA	-9.60996	2.61617	16.4333	0.00013842	0.0153378	down	NA	2cWT-2cKO:8cWT-8cKO:8cKO-2cKO	ENSMUSG00000085973	-1.81399	-1.81399	-1.81399	-1.81399	-1.81399	-1.81399	-1.81399	-1.81399	-1.81399	-1.81399	-1.81399	-1.81399	-1.81399	-1.81399	2.0233	3.38691	5.2756	2.22558	4.59147	5.65713	-1.0235	3.09682	4.30684	3.57269	0.56332	3.1988	-1.26137	4.31057	3.01853	1.14659	2.26786	-1.81399	-1.81399	-1.81399	-1.81399	-1.81399	-1.81399
ENSMUSG00000104243	NA	ENSMUSG00000104243	NA	-8.14542	3.31329	14.4802	0.000302125	0.0235756	down	NA	2cWT-2cKO:8cWT-8cKO:8cKO-2cKO	ENSMUSG00000104243	-1.81399	-1.81399	-1.81399	-1.81399	0.0596176	-1.81399	-1.81399	-1.81399	-1.81399	-1.81399	-1.81399	-1.81399	-1.81399	-1.81399	4.18926	4.17735	0.63516	1.31074	4.83028	4.33295	5.21004	-1.81399	4.94964	5.17165	-0.450327	6.47564	5.18024	4.09734	3.23792	-1.81399	-1.81399	-1.81399	-1.81399	0.626453	3.62922	-1.81399	-1.81399
ENSMUSG00000037902	Sirpa	Sirpa	19261	-6.45769	3.29431	14.4086	0.000293135	0.023201	down	NA	2cWT-2cKO:8cWT-8cKO:8cKO-2cKO	Sirpa	-1.81399	-0.386104	-1.81399	0.109239	-1.81399	-0.803809	-1.81399	-1.81399	-1.81399	-1.81399	-1.81399	-1.35668	-1.81399	-1.81399	3.73126	4.24859	5.15433	3.84204	6.10437	4.52456	1.93062	2.07488	4.90056	4.41771	3.88291	5.06541	3.65875	3.10132	5.43315	-1.81399	2.28892	-1.81399	-1.81399	-0.505962	-1.81399	-1.81399	1.42041
ENSMUSG00000083258	Gm5939	Gm5939	546337	-4.65293	5.21894	17.1707	8.75415e-05	0.0123307	down	NA	2cWT-2cKO:8cWT-8cKO:8cKO-2cKO	Gm5939	0.536005	1.70012	-0.655954	1.41531	3.71883	-0.215469	0.108105	-0.570722	-0.499085	-1.81399	1.4265	1.44581	-0.242772	-1.31443	6.83515	6.71422	6.98601	4.69531	8.32595	6.935	5.20193	3.32232	6.57738	4.55535	4.69708	6.82396	1.79505	4.68097	6.0838	-1.00349	-0.358349	3.63061	-0.915587	3.34332	2.92673	-0.13463	6.58456
ENSMUSG00000094374	Gm5435	Gm5435	432675	-2.62556	7.07592	20.893	2.05013e-05	0.00479933	down	NA	2cWT-2cKO:8cWT-8cKO:8cKO-2cKO	Gm5435	6.53605	3.74696	5.93199	1.41531	3.44538	6.05796	2.08795	5.34793	3.49651	4.69343	2.84691	5.01433	3.5234	0.293787	8.52618	7.73243	7.51013	7.47247	7.82937	8.90056	8.73999	4.93923	7.94177	8.16166	7.50273	6.63641	8.11818	7.69689	8.72171	5.8833	5.93496	5.55917	5.976	7.88773	6.81328	6.90624	6.39252
ENSMUSG00000079029	Gm5662	Gm5662	435337	-3.65603	5.81741	16.0406	0.000148454	0.015919	down	NA	2cWT-2cKO:8cWT-8cKO:8cWT-2cWT	Gm5662	-1.21727	-0.111763	-0.0219397	5.03777	0.0596176	3.33501	-0.554045	-0.570722	-1.35775	-1.81399	0.571603	-1.00997	-1.81399	-1.81399	6.93232	6.79709	6.43068	5.4519	7.31974	8.08192	4.81208	0.792283	7.37646	6.91805	3.13527	6.96405	5.34007	5.48337	4.27918	4.45534	6.2475	5.71232	3.83701	7.59847	3.81771	7.06991	7.48945
ENSMUSG00000094635	NA	ENSMUSG00000094635	NA	-3.2125	4.85435	11.4962	0.00110698	0.0470566	down	NA	2cWT-2cKO:8cWT-8cKO:8cWT-2cWT	ENSMUSG00000094635	2.97462	4.1822	2.37516	2.33626	-1.81399	-0.215469	0.108105	-1.2722	-0.499085	0.507634	-1.81399	-1.35668	-0.242772	1.1159	5.95687	5.88765	5.2756	5.69962	6.67827	5.39956	5.57284	4.66129	5.47885	5.26348	5.66814	5.09934	6.32069	6.13385	6.67381	0.191513	2.76526	4.4638	4.50114	6.13727	5.38882	2.71136	1.42041
ENSMUSG00000108473	NA	ENSMUSG00000108473	NA	-2.19639	6.69524	13.7727	0.000389829	0.0268341	down	NA	2cWT-2cKO:8cWT-8cKO:8cWT-2cWT	ENSMUSG00000108473	4.8931	4.4803	5.77936	6.03151	4.97056	5.5281	3.71998	3.07909	-0.732722	1.3556	4.26396	-1.81399	3.33585	3.26021	7.68553	7.79723	7.4397	6.90403	8.052	8.08595	7.46833	7.45298	8.14638	7.668	7.44709	7.20124	6.17722	7.73672	7.10886	6.29135	4.91142	4.94288	5.52322	6.91604	4.67426	5.42245	8.2427
ENSMUSG00000108963	NA	ENSMUSG00000108963	NA	-4.18734	5.87064	20.1697	2.77582e-05	0.00591499	down	NA	2cWT-2cKO:8cWT-8cKO:8cWT-2cWT:8cKO-2cKO	ENSMUSG00000108963	4.09078	4.21991	2.32562	0.905285	1.35488	-0.803809	-1.81399	-0.879239	-1.35775	-0.229281	0.245778	-0.730648	-0.824285	-0.944065	8.11818	6.22644	7.43726	7.44364	7.347	8.53551	1.47229	6.41743	7.273	7.80148	5.2988	4.4373	5.52195	7.08506	7.02657	0.191513	3.22462	-0.702657	-0.915587	4.65888	-0.912872	-1.81399	0.566096
ENSMUSG00000070902	Zfp352	Zfp352	236537	-3.46874	7.04474	37.4466	3.74736e-08	6.92055e-05	down	NA	2cWT-2cKO:8cWT-8cKO:8cWT-2cWT:8cKO-2cKO	Zfp352	3.94828	4.51105	5.51229	1.41531	5.51575	5.13687	-0.554045	-0.879239	-0.499085	1.6451	0.571603	-0.295506	0.170539	-0.0137838	8.49156	8.39799	8.24093	7.58896	8.7113	9.14478	7.28661	6.43477	8.84934	9.02578	7.5846	8.76642	7.03822	7.77157	7.79255	-0.10847	3.86666	2.15861	3.47201	2.93181	4.14055	5.35779	2.89938
ENSMUSG00000090637	Gm6189	Gm6189	620899	-3.22169	6.68712	14.4566	0.0004369	0.0290898	down	NA	2cWT-2cKO:8cWT-8cKO:8cWT-2cWT:8cKO-2cKO	Gm6189	4.07839	5.91224	4.4479	4.33205	2.82873	4.41548	-0.554045	-0.879239	-1.01165	4.45242	0.83723	-1.00997	-1.81399	-0.944065	8.10957	7.95109	7.84008	5.41276	8.2804	8.55792	7.56952	6.81192	7.87267	8.26346	8.35683	8.5555	7.36302	7.0622	6.70405	1.14659	2.2248	5.01337	2.1576	5.63863	5.14573	4.15594	5.82022
ENSMUSG00000036585	Fgf1	Fgf1	14164	-3.03888	5.68304	11.6014	0.00105395	0.0458579	down	NA	2cWT-2cKO:8cWT-8cKO:8cWT-2cWT:8cKO-2cKO	Fgf1	-0.2056	3.72089	5.14199	0.109239	2.27236	4.41548	-1.81399	2.75823	3.21356	1.3556	-0.17578	-0.496733	-0.242772	-1.81399	5.90282	-1.03526	6.21829	5.88618	7.14534	7.22128	6.77671	7.05114	7.06464	7.57221	6.38653	7.00937	6.7218	7.14065	5.74201	-0.10847	3.95494	6.41115	4.94271	4.89091	5.08411	3.36575	4.97192
ENSMUSG00000093862	Gm5117	Gm5117	330731	-2.99932	7.089	27.0515	1.75314e-06	0.00131193	down	NA	2cWT-2cKO:8cWT-8cKO:8cWT-2cWT:8cKO-2cKO	Gm5117	4.33945	5.66355	6.33078	3.29506	3.22925	5.98757	-0.554045	-1.2722	0.635855	-1.81399	-0.17578	-1.81399	-0.242772	-0.0137838	9.37718	7.69111	7.93921	6.97459	8.5031	9.24647	7.54568	5.28358	8.9594	8.76375	7.63743	7.54279	7.67464	8.59779	8.39447	0.836027	3.2026	3.72964	3.22901	5.49159	4.23809	3.17878	1.95335
ENSMUSG00000045780	Olfr624	Olfr624	258189	-2.52548	6.92086	20.4723	2.18581e-05	0.00504588	down	NA	2cWT-2cKO:8cWT-8cKO:8cWT-2cWT:8cKO-2cKO	Olfr624	5.58274	4.1822	4.66263	6.57886	5.65244	4.87853	1.70473	3.7134	0.534132	3.47104	0.571603	-1.00997	1.48935	2.78127	7.74076	8.16977	8.31531	7.7079	7.73435	8.23409	7.66259	8.15801	7.41846	7.82306	7.93255	8.99651	7.62796	7.87427	7.5008	4.06973	3.37004	4.47098	5.7963	4.64684	3.85099	5.63743	7.51798
ENSMUSG00000113226	NA	ENSMUSG00000113226	NA	-2.39894	6.4373	17.4267	7.8442e-05	0.0117482	down	NA	2cWT-2cKO:8cWT-8cKO:8cWT-2cWT:8cKO-2cKO	ENSMUSG00000113226	4.09078	5.69066	5.6343	3.04036	5.56277	4.9743	4.18079	1.86974	0.534132	1.3556	2.067	2.07356	2.86658	1.33362	6.53902	7.75163	7.57433	7.34184	7.90357	8.06887	7.59761	5.61105	8.16403	7.63234	7.48482	7.61298	5.53853	7.61464	7.5008	4.06973	3.12276	3.91991	4.43712	6.78762	4.22546	4.86312	5.3131
ENSMUSG00000104498	NA	ENSMUSG00000104498	NA	-2.37176	6.1721	14.277	0.000310885	0.0239223	down	NA	2cWT-2cKO:8cWT-8cKO:8cWT-2cWT:8cKO-2cKO	ENSMUSG00000104498	4.02775	4.69189	3.33506	5.53454	5.25451	5.34571	0.108105	-0.570722	2.273	0.507634	0.83723	-0.295506	3.83818	0.54717	7.49648	7.37021	7.35107	7.03705	7.2962	7.69271	6.66903	7.41852	6.63665	6.64821	7.6255	7.72407	6.90394	7.20349	6.84433	3.66891	2.78021	3.84458	2.1576	4.30776	3.99932	6.34168	5.3131
ENSMUSG00000103560	NA	ENSMUSG00000103560	NA	-2.06715	6.2752	12.2822	0.000768746	0.0394362	down	NA	2cWT-2cKO:8cWT-8cKO:8cWT-2cWT:8cKO-2cKO	ENSMUSG00000103560	4.11525	5.07465	4.0506	6.57886	4.74453	5.43498	2.01902	1.15626	1.83343	-0.229281	1.71757	1.96014	0.170539	-1.31443	7.21681	7.39048	7.67903	6.06088	7.64466	7.54964	7.58675	6.84603	7.37982	7.30856	7.72548	7.98678	6.55054	6.91975	7.03209	4.17622	2.01336	4.80774	2.84091	3.40179	2.40629	5.26682	6.35085
ENSMUSG00000055204	Ankrd17	Ankrd17	81702	-1.02071	8.79022	11.7428	0.000986818	0.04421	down	NA	2cWT-2cKO:8cWT-8cKO:8cWT-2cWT:8cKO-2cKO	Ankrd17	8.67528	8.56417	8.45774	7.3706	8.5376	8.27774	7.80112	7.36325	7.96363	6.97679	7.45485	7.39224	7.62685	7.25882	9.98494	9.84966	9.87413	8.73098	10.4795	10.3504	8.34175	8.65639	8.6906	8.83886	8.36076	9.37968	8.79156	8.90084	9.04117	8.29137	8.56457	8.59282	8.85175	8.31317	8.02283	8.56726	8.5074

## Sheet: FOURWAY_8cWT-8cKO_DEG
Figure 1–Source Data 2. Differential Gene Expression (DGE) Analysis. Differential gene expression (DGE) analysis was conducted using the four pairwise comparisons shown in Fig. 1C and 1D, with thresholds of |log₂FC| > 1 and adjusted P < 0.05. The ‘expression’ columns indicate whether each transcript is up- or downregulated in any given comparison. The ‘FOUR_WAY_UP_COMP’ and ‘FOUR_WAY_DOWN_COMP’ c…
ensembl_id	Symbol	Uniq_syms	entrez	logFC	logCPM	F	PValue	FDR	expression	FOUR_WAY_UP_COMP	FOUR_WAY_DOWN_COMP	Uniq_syms	TZSC118	TZSC119	TZSC120	TZSC121	TZSC122	TZSC123	TZSC125	TZSC126	TZSC127	TZSC128	TZSC129	TZSC130	TZSC131	TZSC132	TZSC94	TZSC95	TZSC96	TZSC97	TZSC98	TZSC99	TZSC100	TZSC101	TZSC102	TZSC103	TZSC104	TZSC105	TZSC106	TZSC107	TZSC108	TZSC109	TZSC110	TZSC111	TZSC112	TZSC113	TZSC114	TZSC115	TZSC116
													2c WT	2c WT	2c WT	2c WT	2c WT	2c WT	8c WT	8c WT	8c WT	8c WT	8c WT	8c WT	8c WT	8c WT	2c KO	2c KO	2c KO	2c KO	2c KO	2c KO	2c KO	2c KO	2c KO	2c KO	2c KO	2c KO	2c KO	2c KO	2c KO	8c KO	8c KO	8c KO	8c KO	8c KO	8c KO	8c KO	8c KO
ENSMUSG00000033060	Lmo7	Lmo7	380928	1.10567	8.2602	9.52879	0.00281877	0.049836	up	8cWT-8cKO	8cKO-2cKO	Lmo7	7.71981	8.36679	7.8469	6.9095	8.46211	7.58997	8.2468	7.70723	8.00224	9.45768	7.50821	7.95281	7.9418	8.41898	8.72994	9.43816	8.81438	8.35806	9.68143	10.3103	7.5632	7.95298	8.0048	8.18306	8.337	8.41551	7.28903	7.46006	8.17703	7.16702	6.50537	5.68173	7.51652	6.84406	8.04681	7.19855	7.34833
ENSMUSG00000018476	Kdm6b	Kdm6b	216850	1.3279	8.24845	13.5308	0.000434779	0.02113	up	8cWT-8cKO	8cKO-2cKO	Kdm6b	8.08825	7.89745	8.05121	3.51147	8.0066	8.14879	7.9953	7.94738	7.57037	7.42642	7.41223	7.91018	7.90177	7.28736	9.00317	8.77903	9.46905	9.35841	9.16259	9.90153	7.11797	9.0013	9.08105	9.09977	7.95006	9.73211	8.35944	8.33673	7.94155	5.38064	6.81215	5.53883	6.13578	5.84763	6.52716	6.82885	7.06876
ENSMUSG00000048756	Foxo3	Foxo3	56484	1.43069	7.96649	11.7262	0.00100699	0.0318802	up	8cWT-8cKO	8cKO-2cKO	Foxo3	8.95528	9.44491	9.38945	4.274	8.25584	7.60928	7.70565	7.35528	7.11756	8.40842	7.58922	7.73234	5.30504	7.79897	7.81682	8.13572	9.13049	8.30629	9.47509	9.16819	7.19559	8.7051	7.96657	8.22529	7.50154	8.29136	7.09255	7.6216	7.45776	7.0341	6.62715	6.74881	5.19581	6.29599	5.25851	4.25394	5.72556
ENSMUSG00000061411	Nol4l	Nol4l	329540	1.53946	7.00426	11.3666	0.00117615	0.0341165	up	8cWT-8cKO	8cKO-2cKO	Nol4l	7.31238	6.26473	7.03456	6.16526	7.73108	6.83196	6.67578	7.34036	6.65056	8.20383	7.54349	7.21921	6.88307	6.00681	6.55965	6.50385	6.77595	7.34444	6.29288	7.98266	8.24046	7.35798	7.65507	6.70425	6.68935	7.66394	7.60847	7.66269	7.10014	5.99421	6.59475	5.61852	2.50852	3.48528	5.52131	6.98684	2.6473
ENSMUSG00000019978	Epb41l2	Epb41l2	13822	1.54432	7.09305	14.9072	0.000234864	0.0147867	up	8cWT-8cKO	8cKO-2cKO	Epb41l2	6.62818	6.65721	7.15468	7.97764	7.38368	6.81358	7.40665	7.30058	7.99806	8.10001	7.3203	6.58444	7.25019	7.55538	7.82185	7.40268	7.5354	5.64578	7.79799	8.43135	7.60686	6.91687	5.64076	6.19031	6.85465	6.79147	7.04983	7.11497	6.49909	4.70106	6.51098	6.59313	6.00389	6.237	5.43343	6.189	4.85753
ENSMUSG00000037712	Fermt2	Fermt2	218952	1.55686	6.913	9.52463	0.00282446	0.049836	up	8cWT-8cKO	8cKO-2cKO	Fermt2	4.96215	5.85746	5.78395	5.65313	8.25584	7.35855	5.45687	7.65715	7.34579	6.75168	7.43995	7.29132	7.92026	7.66485	7.47684	7.20193	7.37671	6.77303	7.60757	8.25253	6.50072	5.95193	6.57151	7.18143	7.45937	5.82251	6.90234	7.01009	6.49111	5.71686	6.75087	5.08526	5.69044	6.73742	6.33625	1.48047	0.566096
ENSMUSG00000109336	Samd4b	Samd4b	233033	1.70453	6.6584	10.5431	0.00173384	0.0406677	up	8cWT-8cKO	8cKO-2cKO	Samd4b	6.4449	6.94962	5.86854	1.41531	7.42243	6.21745	7.02024	6.53663	7.08195	6.34045	7.6204	6.84889	7.85886	6.33169	6.94529	6.84641	6.95116	7.10307	6.98	6.87521	7.59297	5.96631	7.57523	6.62606	7.21043	6.1073	7.16106	5.6763	7.02841	4.17622	6.18007	6.18552	4.18763	4.12893	6.82693	3.45087	0.566096
ENSMUSG00000038384	Setd1b	Setd1b	208043	1.77122	7.06409	16.8703	9.96174e-05	0.00871442	up	8cWT-8cKO	8cKO-2cKO	Setd1b	7.10816	6.13256	6.60443	3.78521	7.79154	3.90635	6.40906	7.3206	5.15452	6.9505	6.76479	7.24869	7.16256	6.53577	7.92458	7.44626	8.04268	8.14177	7.75299	8.44883	7.4734	8.15592	6.98302	7.82743	7.29644	8.30718	6.61253	7.09385	7.45503	4.08804	5.97287	4.92731	4.81	4.90108	5.5968	4.0508	4.97192
ENSMUSG00000004056	Akt2	Akt2	11652	1.79129	6.19196	10.735	0.00158312	0.0388466	up	8cWT-8cKO	8cKO-2cKO	Akt2	6.20956	5.75629	7.24739	6.19684	6.74325	5.43498	5.90183	5.26768	4.98174	3.85806	5.84972	6.69344	6.73905	5.56191	6.25348	4.78966	6.27757	7.12442	5.11032	7.20573	5.8625	7.37425	6.45737	7.53049	6.58338	7.27608	6.67383	6.91409	7.07366	4.5508	5.39926	4.34388	3.11087	1.11998	4.73789	2.01557	2.34166
ENSMUSG00000070733	Fryl	Fryl	72313	1.84703	6.59391	9.70156	0.00259316	0.0486032	up	8cWT-8cKO	8cKO-2cKO	Fryl	5.71667	6.87967	6.58614	1.41531	8.19745	6.30426	5.12912	4.95446	5.68016	6.91014	3.12048	6.52087	6.15411	4.61628	7.15118	7.64051	7.66453	6.7159	8.15888	8.2199	6.36565	8.18388	7.40423	7.00387	7.25055	6.18045	5.98802	6.74742	6.28802	3.11196	5.15738	3.5516	-0.915587	5.07285	4.6461	1.48047	0.566096
ENSMUSG00000027523	Gnas	Gnas	14683	1.88051	6.39908	14.7242	0.000254726	0.0156229	up	8cWT-8cKO	8cKO-2cKO	Gnas	5.92128	5.6521	6.49664	5.55905	6.64835	5.99411	6.19921	5.7776	5.93339	6.95712	6.17173	5.6108	6.27394	4.30885	7.16787	6.94502	8.07437	7.31821	6.53765	7.84205	6.63027	7.20666	5.40599	7.60938	6.7645	7.29572	6.4772	6.9268	5.73302	5.16483	3.98106	3.11192	4.40402	5.2504	2.91104	3.53124	2.6473
ENSMUSG00000026623	Lpgat1	Lpgat1	226856	2.00268	6.52733	13.4869	0.000443507	0.0212436	up	8cWT-8cKO	8cKO-2cKO	Lpgat1	5.15736	6.46383	5.73261	6.09993	2.82873	5.98757	5.72917	6.62074	6.13578	2.43358	6.99969	6.02687	6.84135	6.19469	6.9853	7.14082	7.11958	8.21611	6.80877	7.10168	7.05857	7.05114	6.64226	7.42603	7.33027	8.23398	6.04714	7.28471	7.32186	4.96146	3.26769	2.61236	4.7845	5.45754	4.85321	2.01557	-1.81399
ENSMUSG00000026565	Pou2f1	Pou2f1	18986	2.04789	5.91381	9.92288	0.00233126	0.0468976	up	8cWT-8cKO	8cKO-2cKO	Pou2f1	5.18652	5.77753	6.21651	8.33428	4.32098	4.8926	4.33053	4.83505	4.21612	4.41445	5.27579	4.25247	6.31008	5.86254	6.96816	7.13561	5.75644	7.52846	6.74064	6.12395	7.28277	4.0548	6.40335	6.33661	6.1555	6.68935	5.15895	4.7074	6.38885	3.34288	4.34	1.17927	-0.366145	3.61451	3.67638	-1.81399	3.46589
ENSMUSG00000033088	Triobp	Triobp	110253	2.09324	6.82134	16.4551	0.000119196	0.00992381	up	8cWT-8cKO	8cKO-2cKO	Triobp	7.1561	7.26431	5.85987	5.48423	7.44143	6.54609	4.78957	6.11903	5.02457	6.3902	6.32557	5.59822	6.41334	5.29846	7.64068	8.46973	7.54824	7.35996	8.32138	8.00079	7.54087	8.12312	7.38652	7.49181	7.2688	7.3235	6.63003	7.15392	6.48308	4.99094	4.30426	2.29423	0.814552	-1.81399	4.00672	4.73321	3.3006
ENSMUSG00000053931	Cnn3	Cnn3	71994	2.18727	6.62744	14.6664	0.000261347	0.0157093	up	8cWT-8cKO	8cKO-2cKO	Cnn3	4.28658	6.25568	5.85551	5.88409	6.63741	6.6981	6.15572	5.4795	6.06232	5.28366	5.83461	7.28545	4.02368	6.90223	7.66104	8.52418	7.83947	7.17353	8.02311	7.60684	6.9441	6.8066	7.58497	7.29739	7.1781	7.04463	6.18776	7.11621	6.19608	5.02933	2.75016	3.83349	0.814552	5.32784	4.84498	-1.81399	-1.81399
ENSMUSG00000028514	Usp24	Usp24	329908	2.20621	7.37473	28.4997	9.32294e-07	0.000396022	up	8cWT-8cKO	8cKO-2cKO	Usp24	7.52131	7.6768	7.55205	4.38785	8.34259	6.52816	8.6119	8.22497	8.91016	7.08348	8.82162	8.36108	8.27127	7.34175	7.26784	7.23641	6.92475	6.75944	6.27062	6.73288	6.29496	7.31179	6.48052	6.79936	7.75367	8.17156	6.15051	7.50123	6.6357	7.20316	6.66086	6.24741	4.7973	6.12431	5.95147	5.42245	4.79675
ENSMUSG00000040268	Plekha1	Plekha1	101476	2.21559	6.20248	14.4503	0.000287743	0.0166062	up	8cWT-8cKO	8cKO-2cKO	Plekha1	6.69867	6.54531	7.35316	7.27025	6.01561	5.61557	6.19921	6.20012	6.61519	6.21354	5.34141	6.12223	7.15123	6.24704	5.19047	7.16455	6.79256	6.88092	6.89188	6.11346	5.84698	5.43607	6.92131	6.34612	7.29918	7.08187	5.56708	5.6696	4.12265	-0.10847	5.24349	4.16963	1.7986	5.65675	4.48059	1.77269	1.42041
ENSMUSG00000038000	Acd	Acd	497652	2.32037	5.97034	13.1551	0.00051551	0.0230545	up	8cWT-8cKO	8cKO-2cKO	Acd	4.71248	5.78593	5.87717	2.89389	7.59634	3.96081	5.48908	5.21327	6.07595	6.52102	4.78789	5.43801	4.54063	6.29972	6.44433	6.69876	7.12967	5.80539	7.60483	7.16484	4.87464	4.81756	6.60445	6.75003	6.20301	7.50426	5.92953	6.75694	5.74201	2.65244	2.76526	4.6897	3.78652	3.79986	3.96174	-1.81399	-1.81399
ENSMUSG00000029064	Gnb1	Gnb1	14688	2.45391	6.58369	18.5906	4.78549e-05	0.00541086	up	8cWT-8cKO	8cKO-2cKO	Gnb1	7.17514	7.89648	6.54344	5.69797	6.82266	7.02324	6.50985	7.12548	6.99847	2.09255	6.48407	5.86825	7.30493	6.68843	7.57784	7.3711	6.45496	7.19388	6.05714	7.65705	5.65832	6.63714	6.88234	6.76125	6.06839	7.74566	7.4178	6.53886	6.29109	5.29658	4.59375	1.03182	0.597438	4.43919	1.22677	2.5663	5.58883
ENSMUSG00000027203	Dut	Dut	110074	2.45484	6.36047	17.1337	8.89406e-05	0.00812243	up	8cWT-8cKO	8cKO-2cKO	Dut	6.07884	2.65404	6.49384	5.97798	7.46637	4.01329	5.42392	5.99257	7.19979	7.45943	7.47205	3.98893	3.29522	7.11069	6.54876	6.94859	7.57802	7.14993	6.9415	7.50487	6.67491	6.49554	6.58904	6.85184	6.75457	7.1482	6.2292	6.12652	5.76426	4.44117	4.20805	2.63809	4.38717	5.87884	3.17024	2.01557	0.566096
ENSMUSG00000022280	Rnf19a	Rnf19a	30945	2.45714	5.57573	10.5866	0.00169845	0.0404441	up	8cWT-8cKO	8cKO-2cKO	Rnf19a	5.93509	4.09694	4.50465	0.109239	6.52319	4.8926	4.94629	4.51344	3.90583	0.507634	1.06147	4.05487	5.90015	0.426034	6.80397	7.0148	7.28037	5.75151	6.75181	6.99717	5.18557	6.06764	6.78261	6.41621	5.93758	6.49913	6.77348	5.19675	6.31842	0.191513	3.58107	0.867557	0.597438	1.48704	2.92673	-1.81399	-1.81399
ENSMUSG00000003032	Klf4	Klf4	16600	2.63476	6.80609	21.8388	1.2513e-05	0.00223632	up	8cWT-8cKO	8cKO-2cKO	Klf4	6.8301	6.6434	7.95674	6.84118	8.33584	6.718	7.09958	8.25221	5.898	6.36056	7.08836	6.2743	6.26345	7.14947	6.68863	6.97801	6.41756	7.51813	4.35806	6.07974	6.61508	7.10197	7.45504	6.18729	7.81516	5.41887	6.93714	8.74016	6.0767	2.1236	5.18852	2.32623	6.21427	2.93181	4.97138	0.620496	1.42041
ENSMUSG00000053483	Usp21	Usp21	30941	2.69008	5.51436	11.6511	0.00102984	0.0320453	up	8cWT-8cKO	8cKO-2cKO	Usp21	6.30037	6.26322	5.33586	5.78367	3.54241	4.16017	-1.81399	4.78844	3.36936	0.993039	0.83723	3.7368	4.46939	5.15335	6.20038	5.35	6.17218	6.85195	6.83351	5.78158	4.16377	7.23861	6.26236	6.51473	6.09067	7.54484	6.75764	5.70936	5.75984	0.999652	3.42813	0.0765418	-1.81399	0.626453	-1.15558	-0.13463	0.566096
ENSMUSG00000025880	Smad7	Smad7	17131	2.82352	6.51158	16.736	0.000127282	0.0103326	up	8cWT-8cKO	8cKO-2cKO	Smad7	6.09431	7.23699	6.2401	5.53454	6.66999	6.38116	5.3059	6.82258	-0.298064	6.81863	6.20736	5.19648	5.52302	7.06196	8.25726	6.30467	2.70716	7.54326	6.72435	7.36525	7.66111	8.14647	7.04784	7.59063	7.7214	4.30786	6.38397	7.30215	6.35699	0.651443	4.15742	-0.987281	1.98924	3.25092	5.13226	3.27529	-1.81399
ENSMUSG00000051615	Rap2a	Rap2a	76108	2.93302	5.0164	10.1171	0.00212409	0.0452043	up	8cWT-8cKO	8cKO-2cKO	Rap2a	6.35017	4.71848	4.64254	5.84476	5.8549	4.806	-0.185311	3.72759	-1.01165	-1.81399	5.54079	3.09734	4.65743	-1.31443	5.5275	5.29123	5.84728	6.34956	6.20892	4.55588	6.47739	4.01845	6.92131	5.02701	5.82061	6.63641	3.86995	4.7525	5.03964	0.999652	2.26786	-1.81399	1.69292	-1.01655	0.146412	0.620496	-1.81399
ENSMUSG00000020250	Txnrd1	Txnrd1	50493	2.93727	6.00934	20.1716	2.47436e-05	0.003456	up	8cWT-8cKO	8cKO-2cKO	Txnrd1	6.38076	6.89917	6.54615	6.84118	6.5928	7.07353	6.54398	7.11338	6.72747	6.01218	8.36575	7.18175	5.24231	5.90282	5.10721	4.83666	3.95502	4.8931	4.27791	4.60162	0.613069	6.12005	5.40159	5.57462	5.06167	7.01234	6.06155	5.8375	5.28713	4.15901	4.92494	1.49297	5.87693	3.34332	0.885171	1.77269	1.42041
ENSMUSG00000002031	Ift46	Ift46	76568	2.99089	4.7146	9.77119	0.00250762	0.0479895	up	8cWT-8cKO	8cKO-2cKO	Ift46	5.3029	5.50712	3.92316	0.109239	7.23921	5.20614	0.742323	2.70186	4.71744	7.5143	4.84932	3.45919	4.45101	5.36588	4.2562	3.87115	5.16614	5.44221	5.34146	4.72616	3.98625	1.8451	4.3892	4.02269	0.237992	2.04809	5.33058	5.22446	0.833224	1.97417	3.06289	1.17927	0.814552	3.68684	2.33753	-1.81399	2.89938
ENSMUSG00000020905	Usp43	Usp43	216835	3.06901	5.18694	10.9158	0.00145357	0.0373206	up	8cWT-8cKO	8cKO-2cKO	Usp43	5.18073	6.04072	6.18907	-1.81399	0.847977	5.70603	5.09603	5.49202	4.14026	3.80035	7.9035	-0.730648	3.16599	4.76731	5.73589	5.83718	6.59262	4.59399	4.2219	5.58811	2.14885	6.27446	3.67984	6.13805	3.76123	4.55608	6.2545	6.17939	5.11082	3.37305	2.35031	-1.34221	-0.366145	3.90467	3.76632	-1.81399	0.566096
ENSMUSG00000048277	Syngr2	Syngr2	20973	3.08968	4.77202	10.8282	0.00151492	0.038325	up	8cWT-8cKO	8cKO-2cKO	Syngr2	5.0536	5.12521	1.45216	3.69961	0.847977	0.201254	2.08795	5.44986	4.39361	-1.81399	5.24183	5.95221	5.3454	6.05868	4.81595	4.99236	4.68684	6.14984	4.82088	5.02368	5.29637	5.71693	3.77821	6.03926	2.57347	4.89558	5.28219	6.33154	6.10836	2.19288	1.4286	3.52427	2.50852	-1.01655	2.9728	-1.81399	-1.81399
ENSMUSG00000042292	Mrtfa	Mrtfa	223701	3.16738	4.3538	9.94679	0.00230466	0.046652	up	8cWT-8cKO	8cKO-2cKO	Mrtfa	4.36007	4.35597	3.06008	0.109239	3.1077	3.66527	1.78995	5.1356	4.85036	3.54319	5.18339	3.57928	3.02404	-0.405205	5.19668	3.22362	5.06041	5.81292	6.10631	6.25378	-0.51573	3.94287	5.34768	4.91455	4.41384	3.31886	6.08431	4.92567	5.06853	-1.00349	2.20278	2.58617	0.814552	-0.505962	1.06606	-1.81399	-1.81399
ENSMUSG00000052632	Asap2	Asap2	211914	3.18903	4.72046	11.1451	0.00130483	0.0356797	up	8cWT-8cKO	8cKO-2cKO	Asap2	3.24231	4.86848	2.68118	-1.81399	2.48257	0.524193	6.57433	3.56329	4.99616	3.74023	3.99163	3.67823	5.7277	5.51442	5.96599	3.25472	3.8805	4.8202	5.88297	6.45547	-1.81399	5.28358	6.12224	4.15233	6.0716	5.40084	4.62699	5.82247	4.9493	3.03858	3.76514	0.867557	-0.915587	1.37475	1.32476	1.11364	-1.81399
ENSMUSG00000062794	Zfp599	Zfp599	235048	3.21147	6.04864	23.7572	5.8052e-06	0.00138317	up	8cWT-8cKO	8cKO-2cKO	Zfp599	5.25967	5.82724	6.83215	6.5908	6.06543	6.3661	7.35164	6.5606	5.5559	6.0865	7.37876	7.95774	6.0358	5.58332	6.93975	6.51674	6.60858	5.62024	6.77754	6.38164	4.61847	4.79624	4.40688	6.08057	7.34622	3.87053	3.68876	5.58306	5.891	-0.10847	4.42805	4.85786	0.814552	0.973465	4.03594	0.620496	4.73329
ENSMUSG00000031839	Hsbp1	Hsbp1	68196	3.24877	4.93516	13.8289	0.000380089	0.0192605	up	8cWT-8cKO	8cKO-2cKO	Hsbp1	4.0148	1.86787	5.96067	4.85188	3.1077	5.11302	5.49544	5.81462	4.46445	6.70527	6.1352	5.26971	3.80962	1.93162	6.24451	6.05818	6.03075	3.51251	6.64671	4.67002	4.77974	3.75679	4.5727	3.87273	4.68039	5.2479	4.62699	5.4757	4.77618	-1.00349	2.35031	3.91991	3.78652	0.168613	0.436734	-0.13463	-1.81399
ENSMUSG00000025871	4833439L19Rik	4833439L19Rik	97820	3.2608	5.07172	15.4982	0.000180965	0.012429	up	8cWT-8cKO	8cKO-2cKO	4833439L19Rik	4.28658	5.69959	5.55591	2.08939	4.26522	3.84975	6.54091	6.02452	5.59115	6.62442	5.84219	4.60037	6.70456	4.95416	5.14944	4.90685	4.43678	5.24466	5.09481	4.90707	4.88481	4.92947	5.18814	4.05621	1.83426	5.86914	4.65006	6.39387	5.20493	-0.487658	4.25695	4.27995	0.597438	2.85018	2.67135	-1.81399	-1.81399
ENSMUSG00000029338	Antxr2	Antxr2	71914	4.00666	5.18027	16.0767	0.000140506	0.0108974	up	8cWT-8cKO	8cKO-2cKO	Antxr2	5.60882	3.19834	4.67257	7.41155	6.08167	2.90596	5.32744	2.58205	5.97038	-0.229281	-0.773871	0.309284	1.48935	-1.81399	5.77169	6.57641	6.4225	5.92841	6.34297	6.00984	6.18404	3.80027	4.25897	6.45567	4.89086	5.11601	6.86504	5.06501	5.29937	-0.487658	-1.81399	2.19373	0.0307989	-0.129601	-1.44755	-1.81399	-1.81399
ENSMUSG00000034673	Pbx2	Pbx2	18515	4.0117	3.98047	10.0184	0.00222683	0.0460329	up	8cWT-8cKO	8cKO-2cKO	Pbx2	5.37051	-1.81399	4.68244	2.08939	2.97494	-1.81399	-1.81399	3.5313	3.46921	5.49851	0.245778	4.26048	4.76547	2.51039	2.0233	5.05993	4.24219	5.43735	5.62673	5.19261	0.156363	2.20996	3.02944	5.1187	3.88291	5.67281	0.802893	5.19208	5.11775	-1.00349	2.08734	-1.34221	-0.366145	1.11998	-1.81399	-1.81399	-1.81399
ENSMUSG00000033589	Reep4	Reep4	72549	4.10135	4.3061	12.9316	0.000570768	0.0242882	up	8cWT-8cKO	8cKO-2cKO	Reep4	2.50464	2.70811	4.41275	4.59168	3.1077	3.25008	-1.81399	3.69907	3.19701	-1.81399	5.00591	5.13683	0.975669	4.88689	3.51968	5.91224	4.18141	5.75933	-1.09207	0.37261	3.78378	5.69982	4.83023	4.99626	4.68039	7.1278	4.65006	5.75124	3.10476	-1.81399	0.766006	-1.34221	0.597438	-0.505962	1.50278	-0.13463	-1.81399
ENSMUSG00000055415	Atp10b	Atp10b	319767	4.14186	5.22241	15.7781	0.000160067	0.0117201	up	8cWT-8cKO	8cKO-2cKO	Atp10b	6.5224	5.00074	5.76549	5.82468	5.964	1.52621	-1.81399	-1.81399	-0.298064	6.11044	-0.773871	-0.496733	-0.824285	2.31952	6.47404	5.98821	6.0329	4.78998	5.92962	6.37288	6.70104	3.7787	6.42086	6.33388	3.40276	6.91726	6.21638	6.39184	5.10386	-1.00349	-1.23101	-1.34221	-1.81399	-0.129601	1.32476	-1.81399	-1.81399
ENSMUSG00000038011	Dnah10	Dnah10	56087	4.16452	3.66168	9.65969	0.00264605	0.0488125	up	8cWT-8cKO	8cKO-2cKO	Dnah10	4.43971	2.96657	4.03527	0.109239	1.35488	-0.215469	2.59374	5.7844	4.13158	-1.81399	5.43455	2.36847	2.86658	0.293787	1.84501	4.34566	3.71882	-0.792753	3.05625	4.13977	4.67816	-0.144454	4.67838	4.44833	-1.81399	4.98299	4.92052	4.5337	5.58587	0.191513	-1.81399	2.00892	-1.81399	-0.505962	-1.15558	-1.81399	1.42041
ENSMUSG00000029763	Exoc4	Exoc4	20336	4.45431	3.75929	11.845	0.000941064	0.0309633	up	8cWT-8cKO	8cKO-2cKO	Exoc4	4.43971	4.0135	-1.12177	-1.81399	-1.81399	1.52621	-1.05064	4.35797	4.2486	5.55195	3.96412	0.180169	5.22078	-0.0137838	3.47949	1.73868	5.33959	5.0733	5.39942	4.4598	-0.140895	3.71197	4.49217	2.79324	5.1247	5.4278	4.67276	2.76638	0.962012	-0.487658	1.79525	-0.987281	0.341761	0.168613	-1.44755	-1.81399	-1.81399
ENSMUSG00000002797	Ggct	Ggct	110175	4.52711	5.32244	23.0026	7.83645e-06	0.00163956	up	8cWT-8cKO	8cKO-2cKO	Ggct	6.34501	2.99585	4.84071	3.04036	5.39103	6.06419	5.8874	0.402074	-0.499085	4.98005	-0.773871	1.55401	-1.81399	3.0508	6.61981	6.58408	6.15845	6.63744	6.91636	5.83149	5.39927	5.46337	7.41955	5.83815	5.81298	6.01847	5.32103	6.0408	5.59583	-0.487658	0.82486	0.0765418	-0.915587	-1.81399	-1.15558	-1.81399	0.566096
ENSMUSG00000043091	Tuba1c	Tuba1c	22146	4.64719	3.90024	11.7032	0.00100517	0.0318802	up	8cWT-8cKO	8cKO-2cKO	Tuba1c	-1.81399	2.01813	3.78336	0.905285	5.94638	-1.81399	2.68556	2.3077	-0.121657	6.41925	4.01862	2.94669	5.58332	4.47838	2.05099	2.0536	5.7275	4.43707	3.93014	2.60729	1.10572	3.09682	4.04982	5.28908	1.49574	4.84315	4.05416	5.65948	-1.14955	1.71627	-1.23101	-1.34221	2.07587	-1.81399	-1.81399	-1.81399	-1.81399
ENSMUSG00000020326	Ccng1	Ccng1	12450	4.89501	3.97291	13.461	0.000448729	0.0213705	up	8cWT-8cKO	8cKO-2cKO	Ccng1	2.86348	4.79959	4.79593	-1.81399	-1.81399	4.20598	3.84473	0.537079	3.27791	6.57365	6.45966	5.72226	-1.81399	5.38226	-0.941477	3.68964	3.52451	4.31503	-0.103468	4.44872	4.55621	-1.02569	2.80781	4.70231	3.18344	-0.550463	2.67597	4.63353	4.17673	1.27994	2.11118	-1.81399	-0.915587	1.68836	-1.44755	-1.81399	-1.81399
ENSMUSG00000031539	Ap3m2	Ap3m2	64933	4.93237	3.57737	11.9401	0.000900462	0.0304818	up	8cWT-8cKO	8cKO-2cKO	Ap3m2	3.67965	3.51383	-1.12177	0.109239	3.71883	3.41521	0.108105	3.5313	-1.01165	-1.81399	-1.81399	-1.81399	-0.242772	-0.944065	5.71007	2.76495	5.75122	5.19939	4.5061	4.14665	4.8437	4.9681	3.94481	0.169781	5.06809	3.99591	4.61922	4.57734	3.04785	-1.81399	-1.81399	-0.987281	-1.81399	-1.81399	-1.81399	-1.81399	-1.81399
ENSMUSG00000025959	Klf7	Klf7	93691	5.08465	3.22436	10.2765	0.00196835	0.0434772	up	8cWT-8cKO	8cKO-2cKO	Klf7	3.74382	-1.81399	2.04865	-1.81399	2.27236	3.59814	-1.81399	-1.81399	-1.35775	-1.81399	-0.773871	-1.00997	3.48779	-1.31443	4.97254	2.01779	4.64243	3.24926	4.27103	4.58147	-0.140895	2.144	4.50864	5.41326	5.53988	2.84598	3.67383	4.98627	3.42831	-1.81399	-1.81399	-1.81399	-1.81399	-1.01655	-1.81399	-1.81399	-1.81399
ENSMUSG00000031785	Adgrg1	Adgrg1	14766	5.14492	4.80498	22.954	7.99018e-06	0.00163956	up	8cWT-8cKO	8cKO-2cKO	Adgrg1	6.02175	2.84312	2.86581	-1.81399	6.37301	2.96044	5.35567	5.96589	1.55046	1.8861	5.41437	5.27367	5.30504	2.31952	4.99409	3.85094	4.0345	6.46883	5.88523	2.56686	5.04755	4.17527	4.78363	5.57462	5.86928	6.01847	5.0242	6.27524	5.44422	-1.81399	-0.816967	2.32623	-1.81399	-1.81399	-0.0856931	-1.81399	-1.81399
ENSMUSG00000030701	Plekhb1	Plekhb1	27276	5.14593	4.01119	11.4162	0.00114918	0.0338661	up	8cWT-8cKO	8cKO-2cKO	Plekhb1	5.27603	3.88638	-1.81399	-1.81399	7.45395	3.4537	-1.81399	3.26565	-1.81399	6.06215	-1.81399	3.41683	-0.824285	1.26464	2.131	-1.03526	2.92673	5.00916	1.32227	3.73704	4.45063	3.86312	5.32926	4.40216	3.95406	-0.862492	6.32547	2.10926	1.55885	-1.00349	-1.49325	-0.261079	-1.81399	-1.81399	-1.15558	-1.81399	1.42041
ENSMUSG00000021228	Acot3	Acot3	171281	5.16137	3.90308	11.8283	0.000948376	0.0309685	up	8cWT-8cKO	8cKO-2cKO	Acot3	3.62959	0.853519	3.98829	0.109239	1.35488	-0.803809	-1.81399	2.75823	-1.81399	-1.81399	-1.81399	3.83658	-1.81399	-0.649622	5.84271	5.89013	5.70608	5.68327	4.83496	5.21894	-1.81399	0.608847	-0.57353	5.06373	3.44289	6.82227	3.78914	4.86827	1.38597	-1.00349	-1.81399	-1.81399	-1.81399	-1.81399	-1.15558	-1.81399	-1.81399
ENSMUSG00000073155	1810058I24Rik	1810058I24Rik	67705	5.23537	3.0113	9.85616	0.00240718	0.0471414	up	8cWT-8cKO	8cKO-2cKO	1810058I24Rik	3.00111	1.33805	4.70199	-1.81399	0.0596176	-1.81399	-1.05064	-1.81399	5.29331	-0.229281	0.571603	0.907316	4.18803	-1.81399	-0.258838	2.98489	4.45615	2.98152	4.64569	3.34124	-1.81399	3.86312	-1.81399	3.5911	-1.81399	4.67334	3.58086	5.04443	4.37483	-1.81399	-1.81399	-0.987281	-0.366145	-1.81399	-0.217439	-1.81399	-1.81399
ENSMUSG00000062116	Zfp954	Zfp954	232853	5.23854	3.68616	10.5203	0.00175271	0.0407829	up	8cWT-8cKO	8cKO-2cKO	Zfp954	2.94762	3.64899	2.96621	0.109239	-1.81399	1.78958	-1.81399	-0.570722	5.16732	-1.81399	6.17173	4.71552	6.66126	0.762629	-1.81399	1.08143	4.51275	-1.81399	5.36428	5.5652	-1.81399	-1.02569	4.30684	-1.81399	5.58541	1.61973	3.13423	-1.31136	-1.14955	2.1236	-0.495635	-1.81399	-0.915587	-1.01655	-1.44755	-1.81399	0.566096
ENSMUSG00000026393	Nek7	Nek7	59125	5.3333	3.5464	12.8737	0.000586047	0.0245823	up	8cWT-8cKO	8cKO-2cKO	Nek7	4.04058	5.15796	5.25877	4.274	2.02621	4.86431	-1.05064	-0.879239	-1.81399	0.993039	-0.17578	-1.81399	5.27402	-1.81399	4.25024	1.08143	4.58493	3.31441	5.2534	3.18974	3.49606	-0.518807	5.00292	5.24616	4.39351	0.112631	3.88299	2.14836	4.03752	-1.00349	-1.49325	-0.465039	-1.81399	-1.81399	-1.81399	-1.81399	-1.81399
ENSMUSG00000024521	Pmaip1	Pmaip1	58801	5.33561	3.71128	11.2209	0.0012592	0.035432	up	8cWT-8cKO	8cKO-2cKO	Pmaip1	0.67414	0.853519	-0.0219397	-1.81399	3.1077	5.37608	3.40582	-1.81399	-1.81399	-0.229281	5.61342	-1.35668	-1.81399	-0.944065	5.93289	5.03776	-0.0475875	2.17969	-1.81399	5.59566	4.54343	6.18299	4.06103	4.73165	5.73027	-1.81399	3.13423	3.6155	0.359045	-1.00349	-1.49325	-0.987281	-0.915587	-1.81399	-1.44755	-0.13463	-1.81399
ENSMUSG00000105589	Fbxw14	Fbxw14	50757	5.33868	3.74182	11.6162	0.00104672	0.0322997	up	8cWT-8cKO	8cKO-2cKO	Fbxw14	1.38709	2.15421	5.40904	6.79033	0.0596176	0.524193	5.12912	0.537079	-1.81399	-1.81399	-0.17578	-1.81399	4.65743	0.658918	3.09673	0.263359	3.75055	-0.466615	4.6134	5.73217	0.402713	2.44724	3.46036	4.92548	3.82335	6.47133	3.06727	-1.81399	1.55885	-0.10847	-1.49325	-1.81399	-0.915587	-1.81399	-1.81399	-0.13463	-1.81399
ENSMUSG00000024947	Men1	Men1	17283	5.35236	3.64232	12.7609	0.00061705	0.0250758	up	8cWT-8cKO	8cKO-2cKO	Men1	5.48288	6.11432	2.68118	0.905285	1.35488	4.01329	5.32744	5.67518	-0.732722	3.13984	2.58323	1.2666	3.94708	3.48913	2.70196	1.01033	-1.06013	5.29933	3.02386	5.2702	2.55763	-1.81399	0.533169	3.00028	5.22016	4.22832	-1.81399	3.38938	-1.14955	-1.00349	0.429233	-1.81399	-0.915587	-1.81399	-1.81399	-1.81399	1.42041
ENSMUSG00000047352	Olfr976	Olfr976	258364	5.49112	2.93292	9.82785	0.00244017	0.0473257	up	8cWT-8cKO	8cKO-2cKO	Olfr976	3.00111	5.27305	-0.655954	-1.81399	3.79956	4.45396	-1.81399	1.52452	-1.81399	4.33538	-0.773871	-1.81399	-1.81399	1.74163	-0.941477	4.62688	4.07683	-0.200781	3.7238	5.0858	-1.81399	2.91101	-1.81399	3.1568	1.05262	5.26793	2.70563	3.71001	-1.81399	-1.00349	-1.23101	-1.81399	-1.81399	-1.81399	-1.81399	-1.81399	-1.81399
ENSMUSG00000021696	Elovl7	Elovl7	74559	5.56877	3.03784	9.82962	0.00243809	0.0473257	up	8cWT-8cKO	8cKO-2cKO	Elovl7	2.12559	3.53393	3.20411	6.18114	-1.81399	-1.81399	-1.81399	4.72622	-1.81399	-1.81399	-1.81399	-1.81399	-1.81399	-1.31443	4.02448	3.17569	3.61921	3.89979	5.27764	4.87845	-0.51573	-1.81399	0.973692	4.84338	3.15956	2.41434	0.564726	-1.81399	2.72381	-1.81399	-0.816967	-1.81399	-1.81399	-1.81399	-1.81399	-1.81399	-1.81399
ENSMUSG00000032625	Thsd7a	Thsd7a	330267	5.57847	3.77734	13.332	0.000475739	0.0220873	up	8cWT-8cKO	8cKO-2cKO	Thsd7a	4.87888	3.49345	1.35673	4.274	6.37301	0.201254	-1.81399	4.17337	4.6215	5.62026	-1.81399	-1.81399	-1.81399	-0.944065	4.88295	4.99236	4.33581	4.40751	4.25716	5.15901	-1.81399	0.955004	1.15201	4.1708	3.57516	5.6501	-1.26137	4.08731	2.20471	-0.487658	-1.81399	0.21971	-0.915587	-1.81399	-1.81399	-1.81399	-1.81399
ENSMUSG00000045333	Zfp423	Zfp423	94187	5.58593	3.14228	12.0389	0.000860173	0.0298036	up	8cWT-8cKO	8cKO-2cKO	Zfp423	4.0148	-1.81399	-0.655954	-1.81399	3.34136	2.66481	1.51752	0.0869953	-1.35775	-1.81399	0.245778	3.13266	4.31538	-0.405205	0.627278	5.01524	3.39666	2.27005	4.18576	4.91916	-1.0235	5.58643	5.94298	2.95835	4.04811	4.13326	0.908691	0.86821	-1.14955	-1.00349	-1.81399	-1.81399	-1.81399	-1.01655	-1.44755	-1.81399	-1.81399
ENSMUSG00000095514	D13Ertd608e	D13Ertd608e	52673	5.62607	3.25251	11.0217	0.00138279	0.0367063	up	8cWT-8cKO	8cKO-2cKO	D13Ertd608e	3.96183	3.18569	-1.81399	5.67572	-1.81399	-0.215469	-1.81399	3.26565	-1.81399	-1.81399	-1.81399	-1.81399	-1.81399	2.01799	5.24243	4.82634	4.77176	1.02958	1.26799	4.76242	3.46928	3.64201	3.96882	2.6774	-1.81399	0.112631	3.56477	5.68297	4.46453	-1.81399	-1.81399	-1.81399	-1.81399	-1.81399	-1.44755	-1.81399	-1.81399
ENSMUSG00000031990	Jam3	Jam3	83964	5.80352	2.85317	11.8364	0.000987692	0.0315701	up	8cWT-8cKO	8cKO-2cKO	Jam3	1.02342	4.96047	-0.304395	2.33626	3.44538	5.17192	2.15374	0.402074	-1.81399	-1.81399	-1.81399	-1.00997	1.33758	-1.31443	1.06764	5.28371	1.02933	4.99598	-1.40834	1.72913	5.18557	0.608847	-1.27372	1.02983	2.33841	4.88913	1.6192	3.12111	1.55885	-1.81399	-1.81399	-1.81399	-1.81399	-1.81399	-1.81399	-1.81399	-1.81399
ENSMUSG00000039716	Dock3	Dock3	208869	5.80453	4.14657	16.8295	0.000101385	0.00882264	up	8cWT-8cKO	8cKO-2cKO	Dock3	3.79014	4.29838	-1.12177	-1.81399	7.18012	-1.81399	-1.81399	-1.81399	4.89207	1.8861	6.4298	5.3127	0.975669	2.80575	4.30875	4.83666	4.17363	5.66673	2.92208	4.77578	0.156363	1.23397	6.1382	4.28264	1.95017	3.06784	4.80195	1.80113	3.76483	0.836027	-1.00919	-0.987281	-1.81399	-0.505962	-0.912872	-1.81399	-1.81399
ENSMUSG00000001911	Nfix	Nfix	18032	5.80703	3.25266	13.1946	0.000506358	0.022808	up	8cWT-8cKO	8cKO-2cKO	Nfix	4.15118	4.89592	3.62855	-1.81399	2.97494	1.6639	-1.81399	-1.2722	-1.81399	-0.229281	5.65702	0.180169	-1.81399	0.54717	4.46098	4.22524	3.85153	-0.200781	3.39702	5.36756	-1.0235	3.06152	3.55854	4.29392	3.36148	3.93458	2.87182	5.30453	0.691803	-1.00349	-1.81399	-1.34221	-1.81399	-1.81399	-0.705176	-1.81399	-1.81399
ENSMUSG00000039278	Pcsk1n	Pcsk1n	30052	5.83943	3.49303	12.3477	0.000745884	0.0273069	up	8cWT-8cKO	8cKO-2cKO	Pcsk1n	3.3493	1.76957	5.72307	-1.81399	-1.81399	-1.81399	4.74758	4.07694	-1.35775	-1.81399	1.57937	-1.81399	-1.81399	-1.81399	4.61267	-0.761965	4.18915	1.12951	4.70819	-0.503573	2.79181	5.28358	2.14354	4.21302	5.25439	5.42334	5.24732	5.09534	1.18951	-1.00349	-1.81399	-1.81399	-0.915587	-1.01655	-1.81399	-1.81399	-1.81399
ENSMUSG00000020432	Tcn2	Tcn2	21452	5.8435	3.46283	11.2702	0.00123044	0.0349591	up	8cWT-8cKO	8cKO-2cKO	Tcn2	4.66356	3.90964	-0.655954	0.109239	7.1027	3.76046	-1.81399	3.39572	-0.121657	6.06215	4.93683	-1.81399	3.41382	-0.405205	3.96022	-1.81399	-0.200979	2.13229	-0.613147	4.41495	-1.81399	-1.81399	-1.81399	2.71146	-0.450327	5.35008	-1.81399	-1.31136	-1.14955	-1.81399	-1.81399	0.682166	-0.915587	-1.81399	-1.44755	-1.81399	-1.81399
ENSMUSG00000029452	Tmem116	Tmem116	77462	5.93289	2.68439	9.57851	0.00275184	0.0494008	up	8cWT-8cKO	8cKO-2cKO	Tmem116	4.79808	-0.930165	4.90957	-1.81399	0.847977	-0.215469	-1.05064	2.86477	-1.81399	-1.81399	5.79613	-1.35668	-1.81399	-0.0137838	1.64152	-1.3727	0.805949	4.28283	-1.40834	-1.81399	-1.81399	4.55108	0.0834343	1.89637	-1.81399	0.112631	5.1319	3.7987	1.55885	0.191513	-1.81399	-1.81399	-1.81399	-1.81399	-1.81399	-1.81399	-1.81399
ENSMUSG00000026203	Dnajb2	Dnajb2	56812	5.94563	2.30634	9.56572	0.0027689	0.0494008	up	8cWT-8cKO	8cKO-2cKO	Dnajb2	3.96183	2.90617	-1.81399	-1.81399	-1.81399	-1.81399	3.48462	5.01932	3.8434	-1.81399	2.34809	-1.00997	-1.81399	4.08705	-1.81399	-1.81399	1.72673	-0.792753	-1.40834	-1.81399	2.50586	3.80027	3.9204	3.14438	-0.779127	0.429532	4.26805	1.47181	-1.81399	-0.487658	-1.81399	-1.81399	-0.915587	-0.505962	-1.81399	-1.81399	-1.81399
ENSMUSG00000027313	Chac1	Chac1	69065	5.9532	3.37582	11.5824	0.00106336	0.0325491	up	8cWT-8cKO	8cKO-2cKO	Chac1	3.90684	1.14245	1.14456	5.32183	1.72925	-0.803809	-1.81399	-0.879239	-1.81399	-1.81399	4.19464	-1.81399	-1.81399	-1.81399	1.84501	3.87115	5.15433	4.87162	3.82126	3.97189	-1.81399	5.34359	5.23343	4.68528	5.34718	-1.81399	3.06727	-1.81399	4.94151	-1.81399	-1.81399	-1.34221	-1.81399	-1.81399	-1.81399	-1.81399	-1.81399
ENSMUSG00000038037	Socs1	Socs1	12703	5.98213	4.43065	17.609	7.25648e-05	0.00705917	up	8cWT-8cKO	8cKO-2cKO	Socs1	4.94178	4.1822	3.93972	6.57886	7.11063	7.10712	-1.81399	-1.81399	1.60164	-1.81399	6.17173	-1.81399	-0.242772	5.27234	0.627278	1.98107	3.74005	4.85711	4.4278	0.171606	2.45216	4.69623	-0.57353	4.71915	3.40276	-1.81399	5.94204	2.42802	5.2371	-1.81399	-0.358349	-1.34221	-0.915587	-1.01655	-1.81399	-0.13463	-1.81399
ENSMUSG00000021003	Galc	Galc	14420	5.9966	2.77588	11.8801	0.000925854	0.0309008	up	8cWT-8cKO	8cKO-2cKO	Galc	-1.81399	4.48547	0.214167	0.109239	-1.81399	-1.81399	5.0187	3.165	3.74439	5.86511	-0.17578	-1.81399	-1.81399	1.1159	-1.81399	1.08143	3.34217	2.27005	0.657349	2.94358	4.14697	4.17527	4.53299	1.13395	1.5701	-0.294066	-1.26137	3.51437	2.09663	-0.10847	-1.81399	-1.34221	-0.915587	-1.81399	-0.362437	-1.81399	-1.81399
ENSMUSG00000085454	NA	ENSMUSG00000085454	NA	6.01904	2.57136	10.3276	0.001921	0.0429152	up	8cWT-8cKO	8cKO-2cKO	ENSMUSG00000085454	4.46848	1.86787	2.51433	0.109239	-1.81399	-1.81399	4.65974	1.38828	1.44229	-1.81399	-0.773871	-1.81399	-0.824285	-1.81399	0.47209	3.22362	3.16513	0.0236083	4.23611	4.91111	-1.81399	2.60266	1.38394	3.92447	4.35196	3.09051	-1.81399	3.98303	3.45043	-1.81399	-1.81399	-1.81399	-1.81399	-1.81399	-1.81399	-0.13463	-1.81399
ENSMUSG00000039128	Cdc123	Cdc123	98828	6.02084	2.15926	10.3374	0.00191198	0.0428289	up	8cWT-8cKO	8cKO-2cKO	Cdc123	3.56001	1.70012	-1.81399	-1.81399	-1.81399	-0.215469	-0.185311	-1.81399	2.33481	4.25172	1.84369	-1.00997	4.18803	4.6369	1.60464	-0.00470468	-1.81399	0.806195	-1.09207	3.54228	-1.81399	-1.02569	1.15201	3.57269	-1.20569	2.67653	-1.81399	3.28798	4.49678	-1.81399	-0.495635	-1.81399	-1.81399	-1.81399	-0.705176	-1.81399	-1.81399
ENSMUSG00000056895	H2bu2	H2bu2	78303	6.19109	2.69352	11.3729	0.00117269	0.0341165	up	8cWT-8cKO	8cKO-2cKO	H2bu2	3.97526	1.29158	4.89266	2.08939	5.75722	3.29317	-1.81399	-1.2722	4.67625	-0.229281	-0.773871	-1.81399	-1.81399	-1.81399	1.96629	-1.03526	-1.38837	1.39348	-0.832828	3.76411	-1.0235	2.27304	4.15818	0.437345	4.17266	0.112631	-1.81399	3.69688	3.88342	-1.81399	-1.81399	-1.81399	-0.915587	-1.81399	-1.81399	-1.81399	-1.81399
ENSMUSG00000111167	NA	ENSMUSG00000111167	NA	6.19886	3.41971	14.601	0.000269059	0.0160288	up	8cWT-8cKO	8cKO-2cKO	ENSMUSG00000111167	3.28607	-1.45587	3.87231	3.94254	4.97056	2.66481	-1.81399	-0.570722	2.47866	-1.81399	5.07183	-1.81399	-1.81399	-1.81399	3.72267	3.91074	4.94631	3.94163	5.20726	2.75854	4.60623	5.44294	-1.81399	3.5634	3.51995	1.10003	4.83588	3.90526	4.24161	-1.81399	-1.81399	-1.34221	-1.81399	-1.81399	-1.15558	-1.81399	-1.81399
ENSMUSG00000032599	Ip6k2	Ip6k2	76500	6.24813	2.76109	11.1805	0.00128333	0.035432	up	8cWT-8cKO	8cKO-2cKO	Ip6k2	1.97333	-0.72516	4.16769	-1.81399	-1.81399	4.92035	-0.554045	-1.81399	3.58819	6.03738	4.83421	-1.00997	-1.81399	-0.0137838	-1.1781	2.08853	3.57264	-1.81399	2.69405	-1.43989	-1.81399	3.96214	0.973692	3.32022	0.702058	2.92379	3.99533	-1.81399	3.10476	-1.81399	-1.00919	-1.81399	-1.81399	-1.81399	-1.44755	0.620496	-1.81399
ENSMUSG00000030256	Bhlhe41	Bhlhe41	79362	6.27139	3.06756	13.964	0.000357699	0.0186091	up	8cWT-8cKO	8cKO-2cKO	Bhlhe41	4.72842	4.36161	5.27191	-1.81399	0.847977	3.11252	-1.81399	3.56329	-1.01165	-1.81399	-1.81399	-1.35668	3.89366	2.87682	-0.560154	2.18854	2.3685	3.76644	3.93885	3.53181	3.76187	5.18042	-0.319839	4.74815	-0.182729	4.77481	-1.26137	3.35637	2.7947	-1.81399	-1.81399	-0.987281	-1.81399	-1.81399	-1.81399	-1.81399	-1.81399
ENSMUSG00000003161	Sri	Sri	109552	6.27701	0.945847	9.70167	0.00267681	0.0489793	up	8cWT-8cKO	8cKO-2cKO	Sri	-1.81399	-1.45587	-1.81399	-1.81399	-1.81399	-1.81399	-0.185311	-1.81399	0.424689	-1.81399	-1.81399	3.23373	-1.81399	-1.81399	0.832642	-1.81399	-1.81399	1.68382	3.78306	1.72913	-1.0235	4.62548	-1.81399	-1.81399	-1.20569	0.689205	1.09952	-1.81399	-1.81399	-1.81399	-1.81399	-1.81399	-1.81399	-1.81399	-1.81399	-1.81399	-1.81399
ENSMUSG00000056367	Actr3b	Actr3b	242894	6.29067	2.04804	10.2507	0.00199271	0.0437527	up	8cWT-8cKO	8cKO-2cKO	Actr3b	5.42535	-1.1692	-1.81399	0.109239	-1.81399	2.11185	-1.81399	-1.81399	2.53241	-0.229281	3.39224	2.68635	-1.81399	-1.81399	-0.941477	2.72109	-1.81399	-1.81399	4.3252	-0.897071	-0.51573	3.13127	3.90804	-0.287612	3.50107	2.30228	-1.26137	-0.398674	2.15168	-1.81399	-1.81399	-1.34221	-1.81399	-1.81399	-1.81399	-1.81399	-1.81399
ENSMUSG00000052794	1700030K09Rik	1700030K09Rik	72254	6.29552	2.01464	11.7226	0.00104061	0.0322085	up	8cWT-8cKO	8cKO-2cKO	1700030K09Rik	-1.81399	1.08911	-0.655954	4.85188	1.72925	1.78958	-1.81399	2.86477	-1.81399	-1.81399	-1.81399	-1.81399	-1.81399	2.05932	0.832642	3.31497	2.99896	2.65251	4.35806	3.51066	3.29722	-0.518807	3.8575	1.8359	0.56332	1.00776	0.688719	0.434289	1.55885	-1.81399	-1.81399	-1.81399	-1.81399	-1.81399	-1.81399	-1.81399	-1.81399
ENSMUSG00000097434	NA	ENSMUSG00000097434	NA	6.35885	1.08228	9.6276	0.00277305	0.0494008	up	8cWT-8cKO	8cKO-2cKO	ENSMUSG00000097434	-1.21727	-1.81399	-1.81399	-1.81399	-1.81399	-1.81399	-1.81399	-0.879239	3.44138	-1.81399	-0.773871	-1.81399	-0.824285	-1.81399	3.09673	0.935543	2.47363	1.74812	1.09169	5.0858	-1.81399	-1.81399	-1.81399	-0.158969	-1.81399	-1.26118	-1.81399	-1.81399	-1.81399	-1.81399	-1.81399	-1.81399	-1.81399	-1.81399	-1.81399	-1.81399	-1.81399
ENSMUSG00000029713	Gnb2	Gnb2	14693	6.36325	3.78463	18.3438	5.31105e-05	0.00576521	up	8cWT-8cKO	8cKO-2cKO	Gnb2	4.80561	3.55376	3.25793	-1.81399	-1.81399	-1.81399	0.742323	2.55048	4.22431	-0.229281	6.88335	-1.35668	4.72015	4.89262	4.74991	3.9775	4.91398	4.51304	4.66157	5.2702	-0.140895	0.608847	3.02944	3.83461	-0.450327	4.83646	4.01915	4.48871	-1.14955	-0.487658	-0.647373	-1.81399	-1.81399	0.168613	-0.523652	-1.81399	-1.81399
ENSMUSG00000026452	Syt2	Syt2	20980	6.37291	1.6959	9.85034	0.00249397	0.0479895	up	8cWT-8cKO	8cKO-2cKO	Syt2	-1.81399	-0.242423	0.594821	-1.81399	-1.81399	-1.81399	2.15374	2.41678	1.38501	-1.81399	-1.81399	-1.81399	-1.81399	-1.81399	-1.81399	-1.81399	2.2551	-0.200781	3.99841	-1.81399	-1.81399	1.46763	-1.81399	2.16569	-1.81399	5.12701	3.86995	4.14645	-0.0742253	-1.81399	-1.81399	-1.81399	-1.81399	-1.81399	-1.81399	-1.81399	-1.81399
ENSMUSG00000073968	Trim68	Trim68	101700	6.44497	2.19041	9.79486	0.00256063	0.0483772	up	8cWT-8cKO	8cKO-2cKO	Trim68	-1.81399	-1.81399	3.97228	-1.81399	0.847977	4.69793	-1.81399	-1.81399	3.62576	-1.81399	-1.81399	-1.81399	-1.81399	-1.81399	0.202664	3.27002	4.79223	-1.81399	2.63093	2.32166	-1.0235	-0.518807	4.48386	3.29798	-1.81399	-1.81399	-1.81399	3.69688	3.26314	-1.81399	-1.81399	-1.81399	-1.81399	-1.81399	-1.81399	-1.81399	-1.81399
ENSMUSG00000044937	Ttc41	Ttc41	103220	6.44913	2.17051	10.0586	0.00225945	0.0462874	up	8cWT-8cKO	8cKO-2cKO	Ttc41	-1.81399	-1.81399	5.31697	-1.81399	-1.81399	4.68181	3.17183	-1.81399	-1.81399	0.993039	-1.81399	0.907316	-0.824285	-1.81399	2.27881	-1.81399	0.217527	-1.81399	3.59742	-1.81399	-1.81399	4.34634	3.63554	3.20541	-1.81399	3.54907	1.34543	1.04437	2.15168	-1.81399	-1.81399	-1.81399	-1.81399	-1.81399	-1.81399	-1.81399	-1.81399
ENSMUSG00000074480	Mex3a	Mex3a	72640	6.45215	2.27447	10.7095	0.00160237	0.0390721	up	8cWT-8cKO	8cKO-2cKO	Mex3a	5.0216	3.14706	-1.81399	-1.81399	-1.81399	0.524193	-1.81399	0.537079	2.42283	-0.229281	4.56797	-1.00997	-1.81399	-0.649622	-0.401644	-1.3727	2.2551	-1.81399	1.32227	4.392	-1.81399	3.43694	4.02714	3.1568	-0.779127	-1.81399	4.16506	3.73591	-1.14955	-1.81399	-1.81399	-1.81399	-1.81399	-1.01655	-1.81399	-1.81399	-1.81399
ENSMUSG00000030792	Dkkl1	Dkkl1	50722	6.46708	1.86152	9.62337	0.00269284	0.0490765	up	8cWT-8cKO	8cKO-2cKO	Dkkl1	4.49669	0.407205	0.214167	-1.81399	3.22925	-1.81399	-1.81399	2.18968	3.50997	-1.81399	-1.81399	-1.81399	4.57498	-1.81399	4.20167	-1.81399	-1.06013	-1.21483	-1.09207	3.42278	-1.81399	-1.02569	4.14771	1.48844	-0.779127	-1.81399	0.564726	-1.81399	-1.14955	-1.81399	-1.00919	-1.81399	-1.81399	-1.81399	-1.81399	-1.81399	-1.81399
ENSMUSG00000099899	NA	ENSMUSG00000099899	NA	6.49648	2.44331	10.7725	0.00155532	0.0387678	up	8cWT-8cKO	8cKO-2cKO	ENSMUSG00000099899	-1.81399	-1.1692	-1.81399	-1.81399	-1.81399	-0.803809	-1.81399	-1.81399	-1.81399	4.75549	-1.81399	-1.81399	-1.81399	-1.81399	4.2798	3.63159	4.04306	3.24926	4.66157	4.88669	-1.81399	3.68902	-1.81399	3.62723	-1.81399	2.61531	-0.862777	-1.81399	4.39778	-1.81399	-1.81399	-1.34221	-1.81399	-1.81399	-1.81399	-1.81399	-1.81399
ENSMUSG00000022505	Emp2	Emp2	13731	6.53336	4.34024	24.8165	3.82627e-06	0.00102575	up	8cWT-8cKO	8cKO-2cKO	Emp2	3.83501	4.12371	-0.0219397	4.38785	2.82873	6.172	4.31624	3.84936	3.44138	-1.81399	7.30119	-0.496733	-1.81399	1.33362	5.55435	3.50799	5.2756	5.79401	4.63501	5.59817	0.402713	4.07264	3.94481	4.76041	4.63781	5.61143	2.51776	2.93239	4.98005	-0.487658	-0.816967	-0.702657	0.0307989	-1.81399	-1.44755	-1.81399	-1.81399
ENSMUSG00000050373	Snx21	Snx21	101113	6.58626	2.52922	10.5354	0.00174019	0.0406677	up	8cWT-8cKO	8cKO-2cKO	Snx21	3.57772	-1.81399	1.0255	-1.81399	0.0596176	-1.81399	-1.81399	-1.81399	-1.81399	-1.81399	-1.81399	5.43801	-1.81399	0.293787	3.13604	4.24085	-1.38837	3.33549	-1.81399	0.976891	0.402713	1.35553	-1.27372	1.89637	-1.81399	6.03025	0.279313	4.96999	-0.696359	-1.00349	-1.49325	-1.81399	-1.81399	-1.81399	-1.81399	-1.81399	-1.81399
ENSMUSG00000028631	Kcnq4	Kcnq4	60613	6.58827	0.183844	10.2589	0.00205547	0.044314	up	8cWT-8cKO	8cKO-2cKO	Kcnq4	-1.21727	-1.81399	-1.81399	-1.81399	-1.81399	-1.81399	-1.81399	3.03414	-1.81399	-1.81399	-1.81399	-1.81399	2.55865	-1.81399	-1.46129	2.80751	1.8094	-1.81399	-1.81399	1.15107	0.959432	0.792283	-1.81399	-0.76113	-1.81399	-1.81399	1.00726	-1.81399	-1.81399	-1.81399	-1.81399	-1.81399	-1.81399	-1.81399	-1.81399	-1.81399	-1.81399
ENSMUSG00000022575	Gsdmd	Gsdmd	69146	6.65717	2.03886	9.84453	0.00250087	0.0479895	up	8cWT-8cKO	8cKO-2cKO	Gsdmd	-1.81399	-0.930165	-0.304395	-1.81399	-1.81399	-1.81399	-1.81399	-1.2722	-1.35775	-1.81399	-1.81399	-1.81399	3.78048	-0.19626	2.10482	-1.81399	-1.81399	-1.81399	0.157659	-1.81399	5.59778	4.91965	-1.81399	0.169781	3.77701	-1.81399	-1.81399	4.8506	-1.81399	-1.81399	-1.81399	-1.81399	-1.81399	-1.81399	-1.81399	-1.81399	-1.81399
ENSMUSG00000103079	NA	ENSMUSG00000103079	NA	6.74989	0.654708	9.98233	0.00234255	0.0469178	up	8cWT-8cKO	8cKO-2cKO	ENSMUSG00000103079	1.46529	1.08911	-1.81399	0.109239	-1.81399	-0.803809	-1.81399	2.86477	-1.81399	-1.81399	-0.773871	-1.81399	3.02404	-1.81399	2.34741	-1.81399	3.69727	1.22297	1.09169	-1.43989	-1.81399	-1.81399	-1.81399	2.28358	-1.20569	-1.81399	-1.81399	-1.81399	-1.81399	-1.81399	-1.81399	-1.81399	-1.81399	-1.81399	-1.81399	-1.81399	-1.81399
ENSMUSG00000102752	Gm7694	Gm7694	665574	6.76632	3.26351	13.9604	0.000358277	0.0186091	up	8cWT-8cKO	8cKO-2cKO	Gm7694	3.90684	2.25453	5.67937	0.109239	-1.81399	-0.803809	-1.81399	4.35797	3.46921	-0.229281	-1.81399	-1.81399	-1.81399	-1.81399	0.202664	-1.81399	5.5405	3.84204	5.3931	5.05324	5.02933	4.9776	1.52014	1.36549	-0.182729	3.97169	-1.26137	3.33957	3.38301	-1.81399	-1.81399	-1.34221	-1.81399	-1.81399	-1.81399	-1.81399	-1.81399
ENSMUSG00000026307	Scly	Scly	50880	6.84419	0.25604	10.1277	0.00218677	0.0459497	up	8cWT-8cKO	8cKO-2cKO	Scly	1.46529	-1.81399	-1.81399	-1.81399	-1.81399	-1.81399	2.89241	-1.81399	3.21356	-1.81399	-1.81399	-1.81399	-1.81399	-1.81399	-1.46129	2.53097	0.0910507	-1.81399	-1.40834	1.96518	-1.81399	-1.02569	-1.81399	1.13395	-1.81399	-1.81399	-1.81399	-1.81399	1.08024	-1.81399	-1.81399	-1.81399	-1.81399	-1.81399	-1.81399	-1.81399	-1.81399
ENSMUSG00000043635	Adamts3	Adamts3	330119	6.86914	2.7233	12.3156	0.000793786	0.0284582	up	8cWT-8cKO	8cKO-2cKO	Adamts3	3.50552	1.38307	4.8495	-1.81399	-1.81399	3.4537	-1.81399	-1.81399	-1.81399	-1.81399	-1.81399	4.03633	-1.81399	-1.31443	5.32128	3.57112	4.06846	0.0236083	3.88577	1.8687	-1.81399	-1.81399	4.14771	3.30914	0.237992	4.65825	3.27937	3.89381	-1.81399	-1.81399	-1.81399	-1.81399	-1.81399	-1.81399	-1.81399	-1.81399	-1.81399
ENSMUSG00000050212	Eva1b	Eva1b	230752	6.87954	2.03068	9.67708	0.00262396	0.0486207	up	8cWT-8cKO	8cKO-2cKO	Eva1b	3.24231	-1.1692	-1.81399	0.109239	-1.81399	-1.81399	-1.05064	0.537079	-1.81399	-1.81399	-1.81399	-1.81399	4.90701	-1.81399	3.72267	-1.3727	-1.81399	-1.81399	2.18018	-1.81399	-1.81399	4.23985	5.50781	-1.81399	-1.81399	4.11126	-1.81399	-0.939318	-1.14955	-1.81399	-1.81399	-1.81399	-1.81399	-1.81399	-1.44755	-1.81399	-1.81399
ENSMUSG00000062753	AI413582	AI413582	106672	6.88254	2.06252	10.4158	0.001842	0.0418412	up	8cWT-8cKO	8cKO-2cKO	AI413582	2.92012	-1.81399	-1.81399	-1.81399	-1.81399	2.11185	4.72612	-1.81399	-1.35775	-1.81399	4.86428	0.639068	-1.81399	-1.81399	2.94267	-1.81399	3.27102	2.51144	4.26411	4.33897	-1.81399	1.57165	-1.81399	0.516538	-1.81399	-1.81399	-1.81399	-0.00631677	3.28792	-1.81399	-1.49325	-1.81399	-0.915587	-1.81399	-1.81399	-1.81399	-1.81399
ENSMUSG00000106665	NA	ENSMUSG00000106665	NA	6.89981	0.0284598	10.3911	0.00193145	0.0429754	up	8cWT-8cKO	8cKO-2cKO	ENSMUSG00000106665	-1.81399	-1.45587	-1.81399	-1.81399	-1.81399	0.524193	-1.81399	2.06114	3.22992	-1.81399	-1.81399	-1.81399	-1.81399	2.01799	0.100381	-1.3727	-1.81399	-1.21483	-1.81399	2.8286	-1.81399	-1.81399	-1.81399	-1.81399	-1.81399	-1.81399	-0.862777	-1.81399	-1.81399	-1.81399	-1.81399	-1.81399	-1.81399	-1.81399	-1.81399	-1.81399	-1.81399
ENSMUSG00000006403	Adamts4	Adamts4	240913	6.91634	0.844785	9.83282	0.00251482	0.0479895	up	8cWT-8cKO	8cKO-2cKO	Adamts4	-1.21727	-0.386104	-1.81399	-1.81399	-1.81399	-1.81399	-0.554045	-1.81399	-1.81399	-1.81399	-0.773871	-1.81399	-1.81399	4.04653	-1.81399	-0.00470468	-1.06013	-1.81399	0.739436	-0.503573	-1.81399	-1.81399	4.35317	3.84232	-1.81399	-1.81399	-1.81399	-1.81399	-1.81399	-1.81399	-1.81399	-1.81399	-1.81399	-1.81399	-1.81399	-1.81399	-1.81399
ENSMUSG00000115306	NA	ENSMUSG00000115306	NA	6.94408	-0.108917	9.7076	0.00266925	0.0489793	up	8cWT-8cKO	8cKO-2cKO	ENSMUSG00000115306	-1.81399	0.491849	-1.81399	-1.81399	-1.81399	-1.81399	-1.81399	-1.81399	-1.81399	-1.81399	4.1465	-1.81399	-1.81399	-1.81399	-1.81399	-1.81399	-1.38837	-1.81399	-1.81399	-1.81399	-1.81399	-1.81399	-1.81399	-1.19357	-1.81399	2.48449	-1.81399	-1.81399	-1.81399	-1.81399	-1.81399	-1.81399	-1.81399	-1.81399	-1.81399	-1.81399	-1.81399
ENSMUSG00000044033	Ccdc141	Ccdc141	545428	6.9484	1.76615	9.62982	0.00268447	0.0489793	up	8cWT-8cKO	8cKO-2cKO	Ccdc141	-1.81399	2.37084	-1.81399	-1.81399	-1.81399	-1.81399	-1.81399	-1.81399	-1.81399	-0.229281	-1.81399	-1.00997	5.4416	-1.81399	-1.81399	-1.81399	3.08444	4.14635	4.02321	-0.194725	-1.81399	-1.81399	-1.81399	-0.0408644	3.80807	2.89832	-1.81399	0.555603	-0.0742253	-1.81399	-1.81399	-1.81399	-1.81399	-1.01655	-1.81399	-1.81399	-1.81399
ENSMUSG00000032352	Lrrc1	Lrrc1	214345	7.03689	2.28605	12.8313	0.000628639	0.0252382	up	8cWT-8cKO	8cKO-2cKO	Lrrc1	-0.796383	2.128	3.54444	-1.81399	-1.81399	5.08877	-1.05064	-0.879239	-1.81399	-0.229281	-0.773871	4.09123	-0.824285	-1.81399	2.61189	-1.3727	3.35598	2.47391	4.80191	4.71696	1.23853	0.152501	2.60831	2.57012	-1.81399	3.33793	-1.81399	0.95898	-1.14955	-1.81399	-1.81399	-1.81399	-1.81399	-1.81399	-1.81399	-1.81399	-1.81399
ENSMUSG00000027238	Frmd5	Frmd5	228564	7.04541	1.27573	9.7556	0.00260893	0.0486032	up	8cWT-8cKO	8cKO-2cKO	Frmd5	-1.21727	1.51026	2.79477	0.905285	-1.81399	-0.215469	-1.81399	4.23426	-1.81399	-1.81399	-1.81399	-1.81399	-1.81399	-1.81399	-1.81399	3.71221	-1.38837	-1.81399	4.52937	-1.1431	-1.81399	-1.81399	-1.81399	2.88564	2.29522	-1.81399	-1.81399	-1.81399	-1.81399	-1.81399	-1.81399	-1.81399	-1.81399	-1.81399	-1.81399	-1.81399	-1.81399
ENSMUSG00000052419	2610001J05Rik	2610001J05Rik	66520	7.04637	1.75187	10.6581	0.00164181	0.0396487	up	8cWT-8cKO	8cKO-2cKO	2610001J05Rik	-0.47096	-0.545695	-1.81399	-1.81399	-1.81399	-1.81399	-1.81399	0.253119	4.99137	-1.81399	2.84691	-1.81399	0.753772	2.75636	-0.560154	1.14919	2.83105	-1.81399	-1.81399	-0.3409	-1.81399	-1.81399	-1.27372	-0.961208	-1.81399	5.63476	-1.81399	2.36302	-1.14955	-1.00349	-1.81399	-1.81399	-1.81399	-1.81399	-1.81399	-1.81399	-1.81399
ENSMUSG00000043391	2510009E07Rik	2510009E07Rik	72190	7.08362	0.361701	10.4814	0.00185118	0.0419761	up	8cWT-8cKO	8cKO-2cKO	2510009E07Rik	-1.81399	-1.45587	-1.81399	-1.81399	-1.81399	-1.81399	-1.81399	-1.81399	-1.35775	-1.81399	0.571603	-1.35668	-1.81399	4.16483	1.17219	-1.81399	-1.38837	-1.81399	-1.81399	-1.81399	3.10184	-1.81399	2.75357	-1.19357	-1.81399	-1.81399	-1.81399	-1.81399	-1.81399	-1.81399	-1.81399	-1.81399	-1.81399	-1.81399	-1.81399	-1.81399	-1.81399
ENSMUSG00000033966	Cdkl4	Cdkl4	381113	7.08726	2.65984	12.4646	0.000706854	0.0268234	up	8cWT-8cKO	8cKO-2cKO	Cdkl4	2.54121	2.17995	3.8196	-1.81399	-1.81399	-1.81399	-1.05064	-1.81399	-1.81399	-1.81399	-1.81399	3.50034	5.57486	-1.31443	0.100381	3.79915	1.33859	-0.200781	-1.81399	-1.81399	4.99218	0.152501	4.66375	-0.76113	5.70986	3.29953	0.429066	-0.939318	1.18951	-1.81399	-1.81399	-0.987281	-1.81399	-1.81399	-1.81399	-1.81399	-1.81399
ENSMUSG00000041957	Pkp2	Pkp2	67451	7.09918	2.44695	12.9237	0.000572827	0.0242882	up	8cWT-8cKO	8cKO-2cKO	Pkp2	-1.81399	2.96657	-1.81399	0.905285	-1.81399	-1.81399	3.6981	-0.316699	5.36542	0.993039	-0.773871	-1.81399	5.68116	2.21369	3.29499	-1.81399	1.09671	1.22297	-1.81399	1.44675	-1.81399	-1.81399	1.38394	3.52561	-0.450327	2.09369	4.88855	2.6349	-1.81399	-1.81399	-1.81399	-1.34221	-1.81399	-1.81399	-0.523652	-1.81399	-1.81399
ENSMUSG00000094887	LOC100041806	LOC100041806	100041806	7.10724	0.89832	9.92859	0.00240301	0.0471414	up	8cWT-8cKO	8cKO-2cKO	LOC100041806	-1.81399	-0.72516	-1.81399	-1.81399	-1.81399	-1.81399	4.3018	-1.81399	-1.81399	-1.81399	-1.81399	-1.81399	-1.81399	-1.81399	-1.1781	2.69865	-1.38837	-1.21483	1.88793	3.96413	-1.81399	-1.81399	-1.81399	-1.81399	3.64563	-1.81399	-1.81399	-1.81399	-1.81399	-1.81399	-1.81399	-1.81399	-1.81399	-1.81399	-1.81399	-1.81399	-1.81399
ENSMUSG00000086909	Gm4926	Gm4926	237749	7.10932	1.71845	9.69581	0.00268429	0.0489793	up	8cWT-8cKO	8cKO-2cKO	Gm4926	-1.81399	-1.81399	-1.81399	6.08313	-1.81399	-1.81399	-1.05064	-1.81399	-1.35775	-1.81399	-1.81399	4.23632	-1.81399	-0.405205	2.75342	1.50003	3.6754	-0.792753	0.477677	2.46054	-1.81399	-1.81399	-1.81399	-1.81399	-1.81399	-1.81399	-1.81399	-1.81399	-1.81399	-1.81399	-1.81399	-1.81399	-1.81399	-1.81399	-1.81399	-1.81399	-1.81399
ENSMUSG00000043286	Pnpla1	Pnpla1	433091	7.12752	1.37217	9.7905	0.00256595	0.0483772	up	8cWT-8cKO	8cKO-2cKO	Pnpla1	0.67414	-1.81399	4.11033	-1.81399	-1.81399	1.01077	-1.81399	-1.81399	-1.81399	-1.81399	4.3301	-1.81399	-1.81399	-1.81399	-1.81399	2.80751	-1.81399	-1.81399	-1.81399	-1.81399	-1.81399	-0.518807	0.398257	2.19006	0.702058	4.47224	-1.81399	3.21619	-1.81399	-1.81399	-1.81399	-1.81399	-1.81399	-1.81399	-1.81399	-1.81399	-1.81399
ENSMUSG00000109302	NA	ENSMUSG00000109302	NA	7.13527	0.225723	9.76374	0.00259883	0.0486032	up	8cWT-8cKO	8cKO-2cKO	ENSMUSG00000109302	-1.81399	1.4691	-1.81399	-1.81399	-1.81399	-1.81399	4.22737	-1.81399	0.730876	-1.81399	-1.81399	-1.81399	-1.81399	-1.81399	2.131	-1.81399	-1.81399	-1.81399	-1.81399	-1.81399	-0.140895	-1.81399	2.41218	-1.81399	-1.81399	-1.81399	-1.81399	-1.81399	-1.81399	-1.81399	-1.81399	-1.81399	-1.81399	-1.81399	-1.81399	-1.81399	-1.81399
ENSMUSG00000030515	Tarsl2	Tarsl2	272396	7.13965	2.04614	11.4522	0.00112998	0.0336037	up	8cWT-8cKO	8cKO-2cKO	Tarsl2	-1.81399	0.407205	-1.12177	-1.81399	-1.81399	-1.81399	3.20324	6.14305	1.69887	1.8861	-1.81399	-1.81399	-1.81399	0.950052	2.85115	-1.81399	-1.38837	-1.81399	-1.81399	4.33897	-1.0235	-1.81399	-1.81399	4.19508	0.56332	2.04809	-1.26137	-1.81399	0.833224	-1.81399	-0.647373	-1.81399	-1.81399	-1.81399	-1.81399	-1.81399	-1.81399
ENSMUSG00000111429	Gm32511	Gm32511	102635087	7.1441	0.814427	9.61807	0.0027857	0.0494056	up	8cWT-8cKO	8cKO-2cKO	Gm32511	-1.21727	-1.81399	-1.81399	-1.81399	-1.81399	-1.81399	-1.81399	-1.81399	-1.81399	-1.81399	-1.81399	-1.81399	4.33556	-1.31443	-1.81399	-1.81399	-1.81399	-1.81399	-1.81399	-1.81399	-1.81399	3.64201	3.77821	-1.81399	-1.81399	-1.81399	-1.26137	3.10132	-1.81399	-1.81399	-1.81399	-1.81399	-1.81399	-1.81399	-1.81399	-1.81399	-1.81399
ENSMUSG00000073430	Gm10505	Gm10505	100038429	7.15479	1.38627	9.7132	0.00266215	0.0489793	up	8cWT-8cKO	8cKO-2cKO	Gm10505	-1.81399	-1.45587	-1.81399	-1.81399	-1.81399	-0.803809	-1.81399	-1.81399	-1.81399	-1.81399	-1.81399	-1.81399	4.35545	-1.81399	-1.81399	-1.81399	-1.81399	-1.81399	-1.81399	4.35092	1.10572	-1.81399	-1.81399	1.77278	2.60918	5.08812	-1.81399	-1.81399	-1.81399	-1.81399	-1.81399	-1.81399	-1.81399	-1.81399	-1.81399	-1.81399	-1.81399
ENSMUSG00000023004	Tuba1b	Tuba1b	22143	7.17642	0.570404	10.6104	0.00174261	0.0406677	up	8cWT-8cKO	8cKO-2cKO	Tuba1b	0.212339	-1.81399	-1.12177	-1.81399	-1.81399	-1.81399	-1.05064	0.879633	-1.35775	-1.81399	-1.81399	-1.81399	-1.81399	4.22962	-1.81399	-1.81399	1.28181	2.22558	-1.81399	-1.81399	-1.81399	-1.81399	-1.81399	0.437345	-0.182729	-1.81399	3.19823	2.32939	-1.81399	-1.81399	-1.81399	-1.81399	-1.81399	-1.81399	-1.81399	-1.81399	-1.81399
ENSMUSG00000118325	NA	ENSMUSG00000118325	NA	7.2008	0.203876	10.2466	0.00206746	0.044314	up	8cWT-8cKO	8cKO-2cKO	ENSMUSG00000118325	1.21668	-1.81399	-1.81399	-1.81399	0.0596176	-1.81399	-1.81399	-1.81399	-1.81399	-1.81399	-1.81399	0.639068	-1.81399	4.30026	-1.81399	-1.81399	-1.81399	-0.792753	-0.254201	-1.81399	-1.81399	0.608847	-1.81399	2.5325	-1.81399	-1.81399	-1.81399	-1.81399	-1.81399	-1.81399	-1.81399	-1.81399	-1.81399	-1.81399	-1.81399	-1.81399	-1.81399
ENSMUSG00000024837	Dmrt1	Dmrt1	50796	7.23024	1.66028	10.4655	0.00179894	0.0414789	up	8cWT-8cKO	8cKO-2cKO	Dmrt1	-1.81399	-1.81399	-1.81399	-1.81399	0.847977	-1.81399	-1.81399	3.5313	2.42283	0.993039	5.43455	-1.00997	-1.81399	4.14578	-1.81399	-1.03526	-1.38837	-1.81399	-1.81399	-1.81399	-1.81399	-1.81399	-0.57353	-1.47068	-1.81399	1.90195	-1.81399	4.44226	-1.81399	-1.81399	-0.816967	-1.81399	-1.81399	-1.81399	-1.81399	-1.81399	-1.81399
ENSMUSG00000110103	Zscan4-ps1	Zscan4-ps1	545912	7.24436	3.37174	11.0258	0.0015846	0.0388466	up	8cWT-8cKO	8cKO-2cKO	Zscan4-ps1	-1.81399	-1.45587	2.16589	-1.81399	-1.81399	1.20378	-1.81399	-1.81399	-1.81399	-1.81399	4.45393	-1.81399	-1.81399	-1.81399	2.6486	3.17569	5.08965	-1.81399	7.28001	6.85122	-1.81399	-1.02569	3.09635	3.77949	-0.450327	-1.81399	-0.862777	-1.31136	0.359045	-1.81399	-1.81399	-1.81399	-1.81399	-1.81399	-1.81399	-1.81399	-1.81399
ENSMUSG00000027742	Cog6	Cog6	67542	7.27251	2.62482	13.9128	0.000366018	0.0188613	up	8cWT-8cKO	8cKO-2cKO	Cog6	3.87854	3.37587	0.214167	-1.81399	-1.81399	-1.81399	4.0313	-1.2722	1.9565	-1.81399	-0.773871	5.00006	4.83797	3.22433	1.06764	2.2204	2.3685	-1.81399	3.05625	5.14535	-0.140895	-1.81399	2.80781	4.18905	-1.81399	-1.26118	4.40994	-1.31136	-0.352013	-0.487658	-1.81399	-1.81399	-1.81399	-1.81399	-1.81399	-1.81399	-1.81399
ENSMUSG00000113669	NA	ENSMUSG00000113669	NA	7.30982	0.766304	9.9404	0.00238959	0.0471169	up	8cWT-8cKO	8cKO-2cKO	ENSMUSG00000113669	-1.81399	-1.81399	-1.81399	-1.81399	0.0596176	-1.81399	3.00363	-1.81399	-1.81399	-1.81399	3.90748	-1.81399	-1.81399	-1.81399	-1.46129	-1.81399	1.8094	2.98152	-1.81399	4.1603	-1.81399	-1.81399	-1.81399	-1.81399	-1.81399	-1.26118	-1.81399	-1.81399	-1.81399	-1.81399	-1.81399	-1.81399	-1.81399	-1.81399	-1.81399	-1.81399	-1.81399
ENSMUSG00000094992	Fbxw25	Fbxw25	546160	7.30991	0.375589	11.2667	0.00128386	0.035432	up	8cWT-8cKO	8cKO-2cKO	Fbxw25	0.0184512	1.19389	-1.81399	-1.81399	-1.81399	-1.81399	-1.81399	-1.81399	-0.732722	-1.81399	-1.81399	-1.81399	4.48753	-1.81399	1.44685	-1.81399	-1.81399	-0.200781	-1.81399	-1.43989	-1.0235	-1.81399	-1.27372	2.0102	-1.81399	1.73932	0.279313	-1.31136	0.158614	-1.81399	-1.81399	-1.81399	-1.81399	-1.81399	-1.81399	-1.81399	-1.81399
ENSMUSG00000020287	Mpg	Mpg	268395	7.314	1.15673	10.0829	0.0021591	0.0457152	up	8cWT-8cKO	8cKO-2cKO	Mpg	0.38323	3.60216	-1.81399	-1.81399	-1.81399	-1.81399	3.63039	-1.81399	-1.81399	-1.81399	-1.81399	-1.81399	2.33642	4.49353	3.43815	-1.81399	0.217527	-0.792753	2.65228	-1.81399	-1.81399	-1.81399	-1.81399	-1.47068	-1.81399	0.112631	-1.81399	-1.81399	-1.81399	-1.81399	-1.49325	-1.81399	-1.81399	-1.81399	-1.81399	-1.81399	-1.81399
ENSMUSG00000020354	Sgcd	Sgcd	24052	7.33806	1.42676	11.8654	0.000974658	0.0312737	up	8cWT-8cKO	8cKO-2cKO	Sgcd	0.212339	0.916121	-1.81399	1.79137	-1.81399	1.52621	-1.81399	-1.81399	-1.81399	-1.81399	-1.81399	4.48893	-0.242772	-1.81399	1.06764	0.380766	1.99745	4.61138	0.890802	-0.062008	-1.81399	1.75958	-1.81399	2.69453	-1.81399	1.55601	-1.81399	3.55858	-0.352013	-1.81399	-1.81399	-1.81399	-1.81399	-1.81399	-1.81399	-1.81399	-1.81399
ENSMUSG00000006445	Epha2	Epha2	13836	7.34102	1.70328	10.2301	0.00201246	0.0440119	up	8cWT-8cKO	8cKO-2cKO	Epha2	0.0184512	-1.45587	2.22112	-1.81399	-1.81399	-1.81399	-1.81399	-1.2722	-1.81399	-1.81399	5.85722	-1.81399	-1.81399	-1.81399	2.92782	-1.81399	-0.792902	-1.21483	-1.81399	1.40149	-1.0235	-1.81399	-1.81399	1.6376	-1.81399	0.565203	-1.81399	4.81459	2.20471	-1.81399	-1.81399	-1.81399	-1.81399	-1.01655	-1.81399	-1.81399	-1.81399
ENSMUSG00000026177	Slc11a1	Slc11a1	18173	7.39708	0.582019	10.6157	0.00173825	0.0406677	up	8cWT-8cKO	8cKO-2cKO	Slc11a1	0.38323	-1.81399	-1.81399	-1.81399	-1.81399	-1.81399	-1.05064	-1.81399	4.40085	-1.81399	1.57937	-1.81399	-1.81399	-1.81399	1.71259	-1.81399	-1.81399	-1.81399	-1.40834	-1.81399	-1.81399	-1.81399	-1.81399	-1.47068	3.40276	-1.26118	-0.550807	2.39588	-1.81399	-1.81399	-1.81399	-1.81399	-1.81399	-1.81399	-1.81399	-1.81399	-1.81399
ENSMUSG00000015937	Macroh2a1	Macroh2a1	26914	7.40256	2.96481	14.927	0.000232816	0.0147134	up	8cWT-8cKO	8cKO-2cKO	Macroh2a1	3.54207	-1.81399	5.45008	0.109239	0.0596176	-1.81399	5.10438	4.14194	5.65008	-1.81399	1.95966	4.78378	-1.81399	4.23864	4.77088	2.78639	0.958643	-0.792753	-1.81399	3.03533	-1.0235	-1.81399	-0.881557	3.22911	-1.81399	2.09369	-1.81399	-1.81399	3.61618	-1.81399	-1.49325	-0.702657	-0.915587	-1.81399	-1.81399	-1.81399	-1.81399
ENSMUSG00000113716	NA	ENSMUSG00000113716	NA	7.43408	0.331571	9.58356	0.00283198	0.0499156	up	8cWT-8cKO	8cKO-2cKO	ENSMUSG00000113716	-1.81399	-1.81399	1.85272	-1.81399	-1.81399	-1.81399	-1.81399	-1.81399	-1.81399	-1.81399	-1.81399	-1.81399	-1.81399	4.62319	-1.81399	-1.81399	-1.81399	-1.81399	-1.81399	-1.81399	-1.81399	-1.81399	-1.81399	-1.81399	2.9247	-1.81399	-1.81399	-1.81399	-1.81399	-1.81399	-1.81399	-1.81399	-1.81399	-1.81399	-1.81399	-1.81399	-1.81399
ENSMUSG00000040254	Sema3d	Sema3d	108151	7.44202	0.234015	10.9129	0.00151301	0.038325	up	8cWT-8cKO	8cKO-2cKO	Sema3d	0.212339	-1.81399	-1.81399	-1.81399	-1.81399	-1.81399	-1.81399	-1.81399	4.32673	-1.81399	-1.81399	-1.81399	-1.81399	2.31952	-1.81399	-1.3727	-1.81399	-0.792753	-1.81399	2.41572	-1.81399	-1.81399	-0.881557	-1.81399	-1.81399	-1.81399	-1.81399	-1.81399	-0.0742253	-1.81399	-1.81399	-1.81399	-1.81399	-1.81399	-1.81399	-1.81399	-1.81399
ENSMUSG00000101439	Gm336	Gm336	240539	7.50075	0.914345	11.4592	0.00117464	0.0341165	up	8cWT-8cKO	8cKO-2cKO	Gm336	-1.21727	-0.545695	0.214167	-1.81399	1.35488	-1.81399	-1.81399	-1.81399	4.67625	-1.81399	-1.81399	-1.00997	-1.81399	-1.81399	-1.81399	-0.761965	0.805949	3.5309	-1.81399	3.69075	-0.51573	-0.518807	-1.81399	0.169781	-1.81399	-0.550463	-1.81399	-1.31136	0.359045	-1.81399	-1.81399	-1.81399	-1.81399	-1.81399	-1.81399	-1.81399	-1.81399
ENSMUSG00000031576	Kcnu1	Kcnu1	16532	7.52318	2.05982	11.5067	0.0011016	0.0329905	up	8cWT-8cKO	8cKO-2cKO	Kcnu1	1.38709	-1.81399	4.00412	-1.81399	2.97494	-1.81399	4.83038	3.98545	-1.81399	-1.81399	0.83723	0.537292	-0.242772	0.859381	4.50668	-1.3727	-1.38837	-1.81399	-1.81399	-0.897071	-1.81399	-1.81399	-1.81399	3.11923	-0.779127	5.22247	-1.81399	-1.81399	-1.81399	-1.81399	-1.81399	-1.81399	-1.81399	-1.81399	-1.44755	-1.81399	-1.81399
ENSMUSG00000059022	Kcp	Kcp	333088	7.53674	0.308535	11.2436	0.00129766	0.0356699	up	8cWT-8cKO	8cKO-2cKO	Kcp	-1.81399	-1.81399	-1.81399	-1.81399	-1.81399	1.52621	-1.81399	1.5881	-0.732722	-1.81399	4.1465	-1.81399	-0.824285	2.53988	-1.81399	-1.81399	-1.38837	-1.81399	-1.81399	0.37261	-1.81399	0.152501	2.26484	-1.81399	-1.81399	-1.81399	-1.81399	-1.81399	-1.81399	-1.81399	-1.81399	-1.81399	-1.81399	-1.81399	-1.81399	-1.81399	-1.81399
ENSMUSG00000071324	Armc2	Armc2	213402	7.55113	1.8787	11.367	0.0012257	0.0348841	up	8cWT-8cKO	8cKO-2cKO	Armc2	-1.21727	3.4305	-1.81399	0.109239	-1.81399	-1.81399	-1.81399	-1.81399	-0.298064	-1.81399	-1.81399	-1.81399	4.72015	-1.81399	-1.81399	1.27586	3.58443	1.47172	4.80667	1.72913	-1.81399	3.51729	-1.81399	4.75225	-1.81399	-0.550463	0.112196	-1.81399	-1.14955	-1.81399	-1.81399	-1.81399	-1.81399	-1.81399	-1.81399	-1.81399	-1.81399
ENSMUSG00000117534	Gm20161	Gm20161	100504304	7.5563	1.3935	11.0746	0.00140341	0.0368277	up	8cWT-8cKO	8cKO-2cKO	Gm20161	-1.21727	-1.81399	-0.655954	-1.81399	-1.81399	-0.803809	-1.81399	-1.81399	-0.298064	-1.81399	-1.81399	2.1445	4.46939	-1.31443	2.80311	-1.81399	-1.81399	-1.81399	-1.81399	-1.81399	-1.81399	-0.518807	-1.81399	-1.47068	-1.81399	2.61531	3.04424	-1.81399	5.24345	-1.81399	-1.81399	-1.81399	-1.81399	-1.81399	-1.81399	-1.81399	-1.81399
ENSMUSG00000021539	Lect2	Lect2	16841	7.594	0.529957	10.4475	0.00188094	0.0424051	up	8cWT-8cKO	8cKO-2cKO	Lect2	3.21993	1.29158	-1.81399	-1.81399	-1.81399	-1.81399	-1.81399	-1.81399	1.1981	4.69343	-1.81399	-1.81399	-1.81399	-1.81399	-1.81399	1.6479	-1.81399	-1.81399	-1.81399	-1.81399	0.402713	-1.81399	-1.81399	-1.81399	-1.81399	-1.81399	-1.81399	-1.81399	1.18951	-1.81399	-1.81399	-1.81399	-1.81399	-1.81399	-1.81399	-1.81399	-1.81399
ENSMUSG00000039252	Lgi2	Lgi2	246316	7.64023	2.06245	13.0907	0.000559476	0.0240908	up	8cWT-8cKO	8cKO-2cKO	Lgi2	-1.81399	-1.81399	-1.81399	0.109239	0.0596176	-0.803809	-1.81399	-1.81399	-1.81399	4.84384	-1.81399	-0.730648	-1.81399	-1.81399	2.6486	3.38691	3.99971	3.37675	3.3715	4.65563	-1.0235	-1.81399	3.98067	3.89513	2.05745	-1.26118	-0.862777	0.771344	-1.81399	-1.81399	-1.81399	-1.81399	-1.81399	-1.81399	-1.81399	-1.81399	-1.81399
ENSMUSG00000020305	Asb3	Asb3	65257	7.65113	1.3044	10.6257	0.0017301	0.0406677	up	8cWT-8cKO	8cKO-2cKO	Asb3	-1.81399	-1.81399	-1.81399	-1.81399	3.71883	-1.81399	-1.81399	-1.81399	-1.81399	-1.81399	-1.81399	4.40473	-1.81399	2.94454	-1.81399	-1.81399	2.52346	-1.81399	-1.40834	0.913821	-1.81399	-1.81399	-1.81399	0.591608	-1.20569	4.6353	1.4189	-1.81399	2.09663	-1.81399	-1.81399	-1.81399	-1.81399	-1.81399	-1.81399	-1.81399	-1.81399
ENSMUSG00000113184	NA	ENSMUSG00000113184	NA	7.69414	1.10802	10.915	0.00151152	0.038325	up	8cWT-8cKO	8cKO-2cKO	ENSMUSG00000113184	-1.81399	-1.81399	-1.12177	-1.81399	-1.81399	1.20378	4.81012	-1.81399	0.635855	-1.81399	-1.81399	-1.81399	-1.81399	-0.944065	-1.81399	-1.81399	-1.81399	4.54958	-1.40834	1.93373	-1.81399	3.16492	-0.881557	-1.81399	-1.81399	-0.0764337	-1.81399	-0.00631677	-1.81399	-1.81399	-1.81399	-1.81399	-1.81399	-1.81399	-1.81399	-1.81399	-1.81399
ENSMUSG00000020798	Spns3	Spns3	77577	7.69764	0.437695	10.0568	0.00226138	0.0462874	up	8cWT-8cKO	8cKO-2cKO	Spns3	-1.81399	-1.81399	-1.81399	1.79137	-1.81399	-1.81399	-1.81399	-1.81399	-1.81399	-1.81399	-1.81399	4.88565	-1.81399	-1.81399	-1.81399	-1.81399	-1.81399	-1.81399	-1.81399	-1.81399	-1.81399	-1.81399	-1.81399	-1.81399	-1.20569	2.70619	-1.81399	-1.81399	-1.81399	-1.81399	-1.81399	-1.81399	-1.81399	-1.81399	-1.81399	-1.81399	-1.81399
ENSMUSG00000112009	NA	ENSMUSG00000112009	NA	7.72852	0.551016	11.6503	0.00107573	0.0326445	up	8cWT-8cKO	8cKO-2cKO	ENSMUSG00000112009	-1.81399	-1.81399	-0.655954	-1.81399	-1.81399	-1.81399	-1.81399	-1.81399	-1.81399	-1.81399	-1.81399	4.91638	-1.81399	-1.81399	0.387751	-1.3727	2.61823	-1.81399	1.611	-0.686947	-1.81399	-1.81399	-0.319839	-1.81399	-1.20569	-0.862492	-1.81399	-1.81399	0.359045	-1.81399	-1.81399	-1.81399	-1.81399	-1.81399	-1.81399	-1.81399	-1.81399
ENSMUSG00000073007	Tent5d	Tent5d	213449	7.73929	1.53865	11.4885	0.00115891	0.0340323	up	8cWT-8cKO	8cKO-2cKO	Tent5d	-1.81399	-0.930165	4.48222	-1.81399	-1.81399	4.22836	-1.81399	0.774235	-1.81399	-1.81399	-1.81399	-1.81399	4.86598	-1.81399	-1.81399	-1.3727	2.09953	1.22297	-0.103468	-1.81399	-1.81399	-1.02569	1.45365	-1.47068	-0.182729	3.97169	-1.81399	-1.81399	-1.14955	-1.81399	-1.81399	-1.81399	-1.81399	-1.81399	-1.81399	-1.81399	-1.81399
ENSMUSG00000111193	NA	ENSMUSG00000111193	NA	7.74168	0.869127	9.93963	0.00239046	0.0471169	up	8cWT-8cKO	8cKO-2cKO	ENSMUSG00000111193	-1.81399	-1.81399	3.09006	-1.81399	-1.81399	-1.81399	4.92761	-1.81399	-1.81399	-1.81399	-1.81399	-1.81399	-1.81399	-1.31443	0.895077	-1.81399	0.541531	-1.81399	-1.81399	-1.81399	-1.81399	-1.81399	-1.81399	-1.81399	-1.81399	3.94706	-1.81399	-1.81399	-1.81399	-1.81399	-1.81399	-1.81399	-1.81399	-1.81399	-1.81399	-1.81399	-1.81399
ENSMUSG00000026404	Ddx59	Ddx59	67997	7.76345	3.52978	20.9293	2.02978e-05	0.003067	up	8cWT-8cKO	8cKO-2cKO	Ddx59	5.22074	4.69636	4.66263	0.109239	1.35488	4.72964	2.64038	-0.570722	-1.81399	-0.229281	0.245778	-1.81399	0.170539	4.47074	3.22379	0.135544	4.49413	5.44706	5.03105	5.00866	4.77974	4.67303	0.249416	3.81907	3.38227	4.11126	2.99704	-0.189198	4.69511	-1.81399	-1.81399	-1.81399	-1.81399	-1.81399	-1.81399	-1.81399	-1.81399
ENSMUSG00000087403	Kantr	Kantr	72997	7.79977	1.35214	12.3561	0.00077932	0.0281118	up	8cWT-8cKO	8cKO-2cKO	Kantr	-1.21727	1.33805	-0.655954	-1.81399	-1.81399	-1.81399	4.62537	-1.81399	-1.81399	-1.81399	1.4265	-1.81399	-1.81399	2.31952	1.74685	-1.81399	-1.81399	-1.81399	4.88541	0.0595224	-1.81399	-1.02569	1.52014	3.10649	-1.20569	0.112631	-1.81399	0.434289	1.29108	-1.81399	-1.81399	-1.81399	-1.81399	-1.81399	-1.81399	-1.81399	-1.81399
ENSMUSG00000050737	Ptges	Ptges	64292	7.80678	2.79239	15.9291	0.000161147	0.0117475	up	8cWT-8cKO	8cKO-2cKO	Ptges	-1.81399	4.61378	4.51574	0.109239	-1.81399	1.52621	-1.81399	1.5881	1.9953	-0.229281	2.90593	3.38788	-1.81399	2.89975	-1.1781	4.3091	2.2551	2.71818	-1.81399	-0.897071	1.36014	2.95014	4.17891	0.0682993	5.0422	-1.81399	4.8224	5.40481	0.158614	-1.81399	-1.81399	-1.81399	-1.81399	-1.81399	-1.81399	-1.81399	-1.81399
ENSMUSG00000023947	Nfkbie	Nfkbie	18037	7.86881	1.62173	11.6492	0.0010763	0.0326445	up	8cWT-8cKO	8cKO-2cKO	Nfkbie	-0.796383	-1.81399	-1.81399	-1.81399	-1.81399	-1.81399	-1.81399	-0.879239	-1.81399	-1.81399	-1.81399	-1.81399	2.25403	4.8343	-1.81399	-1.81399	-1.81399	-1.81399	4.07155	-0.503573	0.156363	-1.81399	3.02944	4.23074	-1.81399	-1.26118	-1.81399	4.61271	-1.81399	-1.81399	-1.81399	-1.81399	-1.81399	-1.81399	-1.81399	-1.81399	-1.81399
ENSMUSG00000020894	Vamp2	Vamp2	22318	7.91382	1.33821	12.0212	0.000867259	0.029906	up	8cWT-8cKO	8cKO-2cKO	Vamp2	-1.81399	-1.81399	-0.304395	0.109239	-1.81399	-1.81399	-1.05064	5.13027	-0.499085	-1.81399	0.83723	3.83658	3.75074	2.2851	-1.81399	-1.81399	-1.81399	-1.81399	-1.81399	-1.81399	-1.81399	-1.81399	3.51029	-1.47068	-1.81399	-1.81399	-1.81399	0.155968	-1.81399	-1.81399	-1.81399	-1.34221	-1.81399	-1.81399	-1.81399	-1.81399	-1.81399
ENSMUSG00000022773	Ypel1	Ypel1	106369	7.91391	2.70912	16.5492	0.000114437	0.00970433	up	8cWT-8cKO	8cKO-2cKO	Ypel1	1.91879	-1.45587	-1.81399	-1.81399	-1.81399	2.20504	-1.81399	-1.81399	4.6215	1.8861	4.53095	5.62947	-1.81399	3.92884	-0.128904	3.86108	2.81112	-1.81399	-0.832828	2.19476	4.50439	0.608847	3.89557	1.8359	3.18344	4.60413	-1.81399	-0.939318	2.75969	-1.81399	-1.49325	-1.81399	-0.915587	-1.81399	-1.81399	-1.81399	-1.81399
ENSMUSG00000041193	Pla2g5	Pla2g5	18784	7.94282	2.49247	13.1038	0.000527699	0.023389	up	8cWT-8cKO	8cKO-2cKO	Pla2g5	-1.81399	-1.81399	-1.81399	-1.81399	5.69527	-1.81399	-1.81399	0.0869953	-1.81399	-1.81399	6.4298	0.986687	-1.81399	-1.81399	-1.1781	-1.81399	1.39321	0.217749	0.272402	3.07911	-1.81399	3.88347	-0.104157	2.84018	-1.81399	4.10013	2.26235	1.125	1.08024	-1.81399	-1.23101	-1.81399	-1.81399	-1.81399	-1.81399	-1.81399	-1.81399
ENSMUSG00000038352	Arl5c	Arl5c	217151	8.02049	1.36992	11.9459	0.000939416	0.0309633	up	8cWT-8cKO	8cKO-2cKO	Arl5c	-1.21727	-1.81399	-1.81399	-1.81399	-1.81399	-0.803809	-1.81399	-1.81399	-1.35775	-1.81399	5.18339	-1.81399	-1.81399	-0.0137838	-1.81399	-1.81399	-1.81399	-0.792753	1.42507	-1.81399	-1.81399	0.398643	5.13609	-1.81399	0.828617	0.112631	-0.862777	2.71522	-1.81399	-1.81399	-1.81399	-1.81399	-1.81399	-1.81399	-1.81399	-1.81399	-1.81399
ENSMUSG00000072640	Lyrm9	Lyrm9	66274	8.06941	1.31772	11.0694	0.00140679	0.0368277	up	8cWT-8cKO	8cKO-2cKO	Lyrm9	1.02342	-1.81399	-1.81399	-1.81399	-1.81399	-0.215469	-1.81399	-1.81399	-1.81399	4.29416	-1.81399	0.823322	4.11988	-0.649622	-1.81399	2.80751	1.99745	-1.81399	-1.81399	-1.81399	-1.81399	-1.81399	-1.81399	-1.81399	-1.81399	-1.81399	-1.81399	-1.81399	4.98005	-1.81399	-1.81399	-1.81399	-1.81399	-1.81399	-1.81399	-1.81399	-1.81399
ENSMUSG00000037833	Sh2d4b	Sh2d4b	328381	8.12167	1.59989	14.69	0.000275604	0.0161866	up	8cWT-8cKO	8cKO-2cKO	Sh2d4b	-1.81399	0.221383	-1.81399	-1.81399	-1.81399	-0.803809	3.71998	-0.879239	3.60082	-1.81399	-1.81399	-1.81399	-1.81399	3.87199	2.07815	-1.03526	4.74576	-1.81399	2.77413	1.03732	-0.140895	-1.81399	0.973692	0.974802	-0.779127	0.565203	1.84921	3.52926	-0.352013	-1.81399	-1.81399	-1.81399	-1.81399	-1.81399	-1.81399	-1.81399	-1.81399
ENSMUSG00000020014	Cfap54	Cfap54	380654	8.23984	1.09566	11.0312	0.00143201	0.0370946	up	8cWT-8cKO	8cKO-2cKO	Cfap54	-1.81399	-1.81399	-1.81399	1.79137	-1.81399	-1.81399	-1.81399	-1.81399	-1.81399	0.507634	-1.81399	-1.81399	5.3943	-1.81399	-1.46129	0.684659	-1.81399	-1.81399	-1.81399	-1.81399	-1.81399	-1.81399	-1.81399	-1.81399	-1.81399	0.909192	-1.81399	2.14836	4.00799	-1.81399	-1.81399	-1.81399	-1.81399	-1.81399	-1.81399	-1.81399	-1.81399
ENSMUSG00000034796	Cpne7	Cpne7	102278	8.27092	2.80879	13.8085	0.00040625	0.0200364	up	8cWT-8cKO	8cKO-2cKO	Cpne7	3.87854	-1.81399	-1.81399	5.60686	-1.81399	-1.81399	-1.81399	-1.81399	-1.81399	-1.81399	5.14715	3.15001	-1.81399	-1.31443	3.67898	3.99602	-0.200979	1.02958	-1.81399	3.43406	6.08609	2.55269	-1.81399	2.30605	-1.81399	3.23994	-1.81399	2.36302	3.35982	-1.81399	-1.81399	-1.81399	-1.81399	-1.81399	-1.81399	-1.81399	-1.81399
ENSMUSG00000074637	Sox2	Sox2	20674	8.28817	2.03744	12.2084	0.000795374	0.0284582	up	8cWT-8cKO	8cKO-2cKO	Sox2	1.53948	-1.81399	3.93972	-1.81399	-1.81399	-1.81399	-1.81399	-1.81399	-1.81399	-1.81399	6.05923	-1.81399	4.59185	-1.81399	-1.81399	-1.81399	-1.38837	0.806195	1.65397	-1.1431	-0.140895	-1.81399	-1.81399	-1.81399	2.89607	-1.81399	-1.81399	-0.939318	4.40912	-1.81399	-1.81399	-1.34221	-1.81399	-1.81399	-1.81399	-1.81399	-1.81399
ENSMUSG00000045471	Hcrt	Hcrt	15171	8.31934	1.90584	12.0861	0.000881176	0.030198	up	8cWT-8cKO	8cKO-2cKO	Hcrt	2.92012	-1.81399	-1.81399	-1.81399	-1.81399	1.37398	-1.81399	4.64633	0.424689	-1.81399	2.4308	-1.81399	-1.81399	3.86035	-1.81399	3.73445	-1.81399	2.43538	-1.81399	-1.81399	-1.81399	-1.81399	3.54263	-1.47068	5.41431	-1.81399	-1.81399	-1.81399	-1.14955	-1.81399	-1.81399	-1.81399	-1.81399	-1.81399	-1.81399	-1.81399	-1.81399
ENSMUSG00000040726	Hesx1	Hesx1	15209	8.32245	1.64645	12.0016	0.000915806	0.0306887	up	8cWT-8cKO	8cKO-2cKO	Hesx1	-1.81399	4.9935	-1.81399	0.109239	-1.81399	-1.81399	1.61416	-1.81399	3.18028	5.1045	-1.81399	-1.81399	-1.81399	-1.81399	-1.81399	-1.81399	-1.06013	0.922208	-1.81399	-1.81399	-1.81399	-1.81399	-1.81399	2.26076	3.51995	-1.81399	2.26235	2.52033	-1.14955	-1.81399	-1.81399	-1.81399	-1.81399	-1.81399	-1.81399	-1.81399	-1.81399
ENSMUSG00000004110	Cacna1e	Cacna1e	12290	8.33677	1.06389	12.5528	0.000712831	0.0268661	up	8cWT-8cKO	8cKO-2cKO	Cacna1e	-1.81399	-1.81399	-1.81399	-1.81399	-1.81399	-0.803809	-1.81399	3.74164	3.45536	0.507634	-1.81399	4.38289	-1.81399	-0.944065	-1.81399	-1.81399	-1.81399	-1.21483	-1.81399	-1.81399	-1.81399	2.78683	2.37673	-1.81399	-1.81399	-1.81399	-1.81399	-1.81399	3.04785	-1.81399	-1.81399	-1.81399	-1.81399	-1.81399	-1.81399	-1.81399	-1.81399
ENSMUSG00000087198	Tmem274	Tmem274	102636051	8.35234	2.03422	13.4404	0.000478473	0.0221524	up	8cWT-8cKO	8cKO-2cKO	Tmem274	3.57772	2.69031	1.14456	-1.81399	0.0596176	-1.81399	-1.81399	-1.81399	-1.81399	-1.81399	-1.81399	4.74435	4.31538	-1.31443	-1.46129	3.44198	-1.81399	-1.81399	-1.81399	4.18053	1.76433	-1.81399	3.83155	2.39256	3.40276	3.59736	-1.81399	-1.81399	-0.696359	-1.81399	-1.81399	-1.81399	-1.81399	-1.81399	-1.81399	-1.81399	-1.81399
ENSMUSG00000085287	4833418N02Rik	4833418N02Rik	74597	8.39628	1.15663	11.879	0.000968606	0.0312	up	8cWT-8cKO	8cKO-2cKO	4833418N02Rik	-1.81399	-1.81399	-1.12177	-1.81399	-1.81399	-1.81399	-1.81399	-1.81399	-1.81399	-1.81399	5.13487	-1.81399	-1.81399	3.72567	-1.81399	-1.81399	-1.81399	-1.81399	-1.81399	-1.81399	4.3948	1.35553	-0.57353	-1.19357	-1.81399	-0.294066	-1.81399	-1.81399	-1.81399	-1.81399	-1.81399	-1.81399	-1.81399	-1.81399	-1.81399	-1.81399	-1.81399
ENSMUSG00000026156	B3gat2	B3gat2	280645	8.50686	1.44911	11.9628	0.000932201	0.0309633	up	8cWT-8cKO	8cKO-2cKO	B3gat2	4.07839	0.221383	-1.81399	0.109239	-1.81399	-1.81399	-1.81399	-1.81399	-1.81399	-1.81399	5.69934	-1.81399	-1.81399	-1.81399	-1.81399	-1.81399	-1.38837	2.51144	2.77413	1.96518	-1.81399	-1.81399	-1.81399	1.98257	-1.81399	-1.81399	-1.81399	0.555603	-1.81399	-1.81399	-1.81399	-1.81399	-1.81399	-1.81399	-1.81399	-1.81399	-1.81399
ENSMUSG00000032358	Fam83b	Fam83b	208994	8.52906	2.27405	14.8615	0.000255724	0.0156264	up	8cWT-8cKO	8cKO-2cKO	Fam83b	2.86348	4.28065	0.214167	-1.81399	-1.81399	-1.81399	-1.81399	2.9398	-1.81399	0.993039	4.69053	4.09123	-0.824285	-0.0137838	3.51968	-1.81399	3.06774	3.10941	2.90439	4.09783	0.613069	-1.81399	-1.81399	-1.81399	3.0073	4.76779	-1.26137	-1.81399	-1.81399	-1.81399	-1.81399	-1.81399	-1.81399	-1.81399	-1.81399	-1.81399	-1.81399
ENSMUSG00000086380	NA	ENSMUSG00000086380	NA	8.58632	2.12546	14.6424	0.000281398	0.016411	up	8cWT-8cKO	8cKO-2cKO	ENSMUSG00000086380	-1.81399	-1.81399	-1.81399	0.109239	-1.81399	-1.81399	-1.81399	3.32284	-1.01165	-1.81399	4.93683	-1.81399	3.86618	-1.81399	1.60464	-1.81399	0.441403	3.8712	1.73624	0.549003	0.156363	-1.81399	-1.81399	2.28358	6.00614	1.55601	-1.26137	-1.81399	-0.696359	-1.81399	-1.81399	-1.81399	-1.81399	-1.81399	-1.81399	-1.81399	-1.81399
ENSMUSG00000039853	Trim14	Trim14	74735	8.6422	2.72344	20.7972	1.91269e-05	0.00291659	up	8cWT-8cKO	8cKO-2cKO	Trim14	0.212339	1.8992	-1.81399	-1.81399	-1.81399	1.90519	4.90868	4.30219	3.76699	-1.81399	-0.773871	4.21999	4.02368	2.65218	2.15671	3.6667	0.884315	4.11011	-1.81399	-1.81399	0.613069	-0.518807	1.06561	2.6774	4.20802	5.15954	3.74697	3.27036	-0.0742253	-1.81399	-1.49325	-1.81399	-1.81399	-1.81399	-1.81399	-1.81399	-1.81399
ENSMUSG00000032446	Eomes	Eomes	13813	8.68604	3.18656	19.6636	3.05408e-05	0.00400651	up	8cWT-8cKO	8cKO-2cKO	Eomes	-1.81399	3.59261	-1.81399	-1.81399	0.0596176	-1.81399	-1.05064	-1.81399	3.76699	-0.229281	5.36263	0.180169	5.60841	4.06693	4.5216	1.14919	0.541531	-1.21483	2.73465	5.63774	4.36605	5.06039	4.58051	-0.76113	3.80807	0.565203	-1.81399	4.18457	-1.81399	-1.81399	-1.81399	-1.34221	-1.81399	-1.81399	-1.81399	-1.81399	-1.81399
ENSMUSG00000047787	Flrt1	Flrt1	396184	8.7434	2.50419	14.9905	0.000241747	0.0149928	up	8cWT-8cKO	8cKO-2cKO	Flrt1	2.94762	3.46232	-0.655954	-1.81399	-1.81399	-1.81399	3.6071	-0.879239	-1.81399	-1.81399	2.78537	-1.81399	-1.81399	5.39845	2.07815	-1.81399	-1.81399	3.22688	1.56672	4.3025	4.92479	1.66867	3.11798	-1.81399	-1.81399	5.38717	-1.26137	-1.81399	-0.0742253	-1.81399	-1.81399	-1.81399	-1.81399	-1.81399	-1.81399	-1.81399	-1.81399
ENSMUSG00000037638	Zbtb42	Zbtb42	382639	9.59769	2.46221	13.3993	0.00054313	0.0237562	up	8cWT-8cKO	8cKO-2cKO	Zbtb42	-1.81399	-1.81399	-1.81399	6.16526	-1.81399	-0.215469	-1.81399	-1.81399	2.03308	-1.81399	6.73662	-1.81399	-1.81399	-1.81399	-1.81399	-1.81399	-1.38837	-1.81399	-1.81399	0.778753	-1.81399	-1.81399	3.11798	-1.81399	-1.81399	2.13789	-1.81399	-0.398674	-1.81399	-1.81399	-1.81399	-1.81399	-1.81399	-1.81399	-1.81399	-1.81399	-1.81399
ENSMUSG00000048251	Bcl11b	Bcl11b	58208	9.64024	2.02724	14.1842	0.000344102	0.0186091	up	8cWT-8cKO	8cKO-2cKO	Bcl11b	-1.81399	-1.81399	-1.81399	-1.81399	-1.81399	4.18326	-1.81399	-0.879239	-1.81399	-1.81399	6.54104	-1.35668	4.09642	1.88642	-1.81399	-1.81399	-1.81399	1.39348	-1.81399	-1.81399	-1.81399	-1.81399	-1.81399	-1.81399	-1.81399	-1.81399	-1.81399	2.93239	-1.81399	-1.81399	-1.81399	-1.81399	-1.81399	-1.81399	-1.81399	-1.81399	-1.81399
ENSMUSG00000032547	Ryk	Ryk	20187	1.65216	6.75451	10.0721	0.0021703	0.0457774	up	8cWT-8cKO	8cWT-2cWT:8cKO-2cKO	Ryk	7.18817	7.17594	7.60232	4.85188	5.964	6.97444	5.43057	2.2301	4.91755	4.56067	2.067	4.75573	6.06025	5.16759	6.67201	7.41305	7.67628	7.84283	7.21065	7.22209	6.17164	8.56876	7.60521	8.31456	7.67372	8.19266	6.79261	7.79332	7.51924	2.83691	4.1745	2.04783	4.18763	4.35291	1.22677	2.01557	-1.81399
ENSMUSG00000032294	Pkm	Pkm	18746	1.86118	6.63334	11.1557	0.00129837	0.0356699	up	8cWT-8cKO	8cWT-2cWT:8cKO-2cKO	Pkm	7.44616	7.77032	7.58926	7.54025	8.36266	7.30692	5.24684	5.38421	4.49184	6.38039	4.39334	6.12442	6.28954	6.28673	6.94067	7.24321	7.31703	6.86288	6.7848	6.367	7.37403	6.70733	7.49691	4.70654	7.00964	4.5642	6.73084	7.88588	7.18671	5.3354	-0.117675	2.87286	1.31958	3.00907	3.93095	5.52415	-1.81399
ENSMUSG00000031631	Cfap97	Cfap97	66756	2.20273	6.6738	10.0496	0.00252314	0.0480931	up	8cWT-8cKO	8cWT-2cWT:8cKO-2cKO	Cfap97	6.13376	6.70896	6.5596	7.5586	4.32098	6.66977	-1.81399	5.44127	2.63425	0.507634	2.65381	4.10019	0.170539	5.02887	8.10833	8.5728	8.55727	7.94751	8.77564	8.60641	6.57482	6.2706	7.05346	7.19579	6.8074	6.65364	6.73444	6.32728	6.70175	1.402	2.73489	-0.702657	-0.915587	0.168613	3.11653	0.620496	1.42041
ENSMUSG00000056383	AI987944	AI987944	233168	2.38534	6.04206	12.4013	0.000727704	0.0271332	up	8cWT-8cKO	8cWT-2cWT:8cKO-2cKO	AI987944	6.27073	7.81104	6.48541	6.2729	8.05673	5.41562	3.00363	1.5881	4.85564	0.993039	-0.773871	2.88587	3.16599	3.68665	6.85688	6.11436	6.53001	7.16325	7.29196	7.83834	5.05657	4.07264	5.41038	7.00816	7.04103	8.14066	6.09275	4.88573	5.07567	-1.00349	0.766006	-0.702657	1.57888	2.67159	0.60219	-0.13463	-1.81399
ENSMUSG00000002733	Plekha3	Plekha3	83435	2.46515	6.54418	15.2105	0.000205399	0.0134938	up	8cWT-8cKO	8cWT-2cWT:8cKO-2cKO	Plekha3	6.78887	6.61419	7.9929	5.23321	7.59634	6.58994	0.108105	3.6403	3.33952	0.507634	-1.81399	4.83293	0.491429	4.43194	7.36823	8.00638	7.52931	7.12593	7.45951	7.46624	6.82768	7.77648	6.90118	8.24068	6.56985	7.28102	7.68584	5.75124	7.67415	2.55054	-0.232999	-0.702657	-0.366145	0.168613	1.93386	-0.13463	0.566096
ENSMUSG00000029710	Ephb4	Ephb4	13846	2.80109	5.72891	15.4824	0.000182228	0.0124607	up	8cWT-8cKO	8cWT-2cWT:8cKO-2cKO	Ephb4	5.00205	5.33164	6.10347	6.06613	7.43513	6.50086	4.90868	4.82189	3.44138	-0.229281	5.10998	4.97595	4.59185	1.63634	6.65519	6.51192	5.4787	7.65752	4.86727	5.18596	7.51491	6.5443	6.72739	5.7405	7.36462	6.03318	4.59565	5.03403	6.25698	-1.00349	2.82414	2.85103	2.1576	0.168613	1.50278	-1.81399	-1.81399
ENSMUSG00000040818	Dennd6a	Dennd6a	211922	2.8187	5.67569	11.8446	0.000941218	0.0309633	up	8cWT-8cKO	8cWT-2cWT:8cKO-2cKO	Dennd6a	7.37577	7.20287	7.26392	5.20242	7.66797	6.87159	5.41052	2.67283	0.635855	6.52102	-0.17578	-1.00997	0.753772	0.148183	6.31757	6.45113	6.72761	6.10451	5.76789	6.02484	4.04184	5.81026	5.3883	6.24801	5.99269	6.23996	5.3774	5.72884	3.47222	0.999652	-0.0108905	-0.465039	-0.915587	2.02236	1.06606	3.53124	0.566096
ENSMUSG00000033352	Map2k4	Map2k4	26398	3.42172	6.38753	28.9797	7.78775e-07	0.000359556	up	8cWT-8cKO	8cWT-2cWT:8cKO-2cKO	Map2k4	7.51328	7.47976	7.3792	7.50283	7.02088	7.0889	-1.05064	5.41959	3.76699	6.23548	3.54859	5.5533	6.30497	3.39543	7.04761	6.95689	8.06704	7.17938	7.37857	7.28185	6.14227	6.9218	4.69286	6.70319	6.7121	6.61702	6.21895	7.17064	6.30026	0.439729	3.48398	0.349944	0.341761	-0.129601	0.948021	3.07534	0.566096
ENSMUSG00000085600	E330012B07Rik	E330012B07Rik	100039641	3.75182	4.93632	12.8754	0.000585583	0.0245823	up	8cWT-8cKO	8cWT-2cWT:8cKO-2cKO	E330012B07Rik	4.84271	4.09017	6.05109	7.38438	5.73686	1.6639	-0.554045	-0.879239	1.05852	-1.81399	-0.773871	-1.81399	1.62667	3.14977	3.19926	6.11859	6.25563	5.34162	6.08095	6.35666	3.71705	3.66571	5.61817	5.42357	4.20802	7.19864	6.19039	6.0408	3.40584	-1.81399	-1.49325	-1.34221	-0.366145	-1.81399	-1.15558	-1.81399	-1.81399
ENSMUSG00000005268	Prlr	Prlr	19116	4.1025	5.43332	18.6486	4.67006e-05	0.00535317	up	8cWT-8cKO	8cWT-2cWT:8cKO-2cKO	Prlr	5.98903	6.40775	6.34328	5.48423	2.27236	3.25008	-0.554045	1.45801	3.6981	2.27311	-0.17578	3.74824	4.02368	-1.81399	7.05703	6.31208	4.94631	7.20966	7.20344	6.79326	5.88293	5.76709	6.97415	5.80106	3.53859	6.04193	6.1825	5.9047	6.5866	0.191513	-1.81399	-1.81399	-1.81399	-0.129601	-1.44755	1.11364	-1.81399
ENSMUSG00000071657	Bscl2	Bscl2	14705	4.16359	5.39235	21.3262	1.54083e-05	0.00266773	up	8cWT-8cKO	8cWT-2cWT:8cKO-2cKO	Bscl2	5.91781	3.02455	4.86692	4.08438	7.55042	3.4537	3.45883	4.94234	1.87563	-0.229281	1.71757	2.68635	-0.824285	2.59712	6.92486	6.47938	6.75394	2.95453	5.30486	7.4216	3.76187	6.83301	6.08153	6.7954	4.33073	6.96712	6.2645	5.66286	5.78618	0.191513	-1.49325	-1.34221	0.597438	-1.01655	-1.15558	-1.81399	0.566096
ENSMUSG00000050612	Txndc2	Txndc2	213272	4.31549	4.77782	16.1958	0.000133403	0.0105431	up	8cWT-8cKO	8cWT-2cWT:8cKO-2cKO	Txndc2	5.70463	4.42218	5.03817	6.45372	4.82388	3.8206	-1.05064	2.06114	0.424689	-1.81399	0.83723	1.74873	-1.81399	-1.31443	5.72948	6.6817	6.47725	3.39695	6.63066	6.55053	3.57354	5.76161	5.5119	5.50107	3.34039	4.2385	4.6877	6.29062	4.63842	-1.81399	-1.23101	-1.81399	-1.81399	-1.81399	-1.44755	-1.81399	-1.81399
ENSMUSG00000048402	Gli2	Gli2	14633	4.4643	4.33528	12.5625	0.000675773	0.0258802	up	8cWT-8cKO	8cWT-2cWT:8cKO-2cKO	Gli2	5.56065	5.8753	5.24551	7.53408	2.02621	6.59426	0.903979	-0.879239	4.06018	-1.81399	4.17077	1.74873	-1.81399	0.762629	1.71259	4.00519	5.30439	4.35686	4.19306	3.88413	1.57634	4.8998	3.94481	-1.47068	6.05874	-1.81399	-0.862777	4.0045	4.77618	-0.487658	-1.81399	-0.0824149	-1.81399	-1.01655	-1.15558	-1.81399	-1.81399
ENSMUSG00000020185	E2f7	E2f7	52679	4.72333	5.34309	23.7485	5.82527e-06	0.00138317	up	8cWT-8cKO	8cWT-2cWT:8cKO-2cKO	E2f7	6.06635	4.75319	4.65262	-1.81399	5.75722	6.99089	-1.05064	-0.316699	-1.35775	0.993039	0.571603	4.25247	5.23159	3.00923	5.87211	6.0157	5.62852	4.48502	6.91525	6.87418	6.71536	5.28358	7.09359	6.37696	6.77633	5.15417	5.31623	6.27303	6.05159	-1.00349	-0.647373	-1.34221	-1.81399	0.168613	-0.912872	-0.13463	-1.81399
ENSMUSG00000110329	NA	ENSMUSG00000110329	NA	5.19838	3.77819	12.7887	0.000609244	0.0249841	up	8cWT-8cKO	8cWT-2cWT:8cKO-2cKO	ENSMUSG00000110329	1.46529	3.83869	5.05346	6.25801	7.18012	1.37398	-1.81399	3.39572	3.44138	-1.81399	-1.81399	0.823322	-1.81399	-1.81399	4.40308	3.38691	4.4039	0.217749	3.66199	3.22913	4.40896	-0.144454	0.77018	1.77278	1.5701	4.11126	4.45429	4.64725	5.25607	-1.00349	-1.81399	-1.34221	-1.81399	-1.81399	-1.44755	-1.81399	-1.81399
ENSMUSG00000098212	NA	ENSMUSG00000098212	NA	5.4561	3.97628	15.1829	0.000207912	0.0135518	up	8cWT-8cKO	8cWT-2cWT:8cKO-2cKO	ENSMUSG00000098212	3.92078	5.85746	4.95915	2.547	0.0596176	5.97439	-1.81399	-1.81399	3.33952	0.993039	-0.773871	2.10947	-0.824285	1.68994	4.47126	4.39534	6.19542	4.46603	5.93398	1.8687	2.14885	-1.81399	4.72845	5.74256	5.00248	4.54791	3.08994	3.78636	4.09483	-1.81399	-1.81399	-0.987281	-1.81399	-1.81399	-1.81399	-1.81399	-1.81399
ENSMUSG00000056380	Gpr50	Gpr50	14765	5.55469	4.5883	15.9241	0.000150173	0.0112984	up	8cWT-8cKO	8cWT-2cWT:8cKO-2cKO	Gpr50	5.16324	5.37128	6.94922	0.109239	7.20256	6.60712	4.39995	-1.81399	-1.35775	0.507634	0.571603	-1.81399	-1.81399	0.950052	4.96528	5.28748	-1.81399	2.54802	6.32314	3.75514	5.37061	6.50871	4.17891	-0.585449	4.64643	-0.0764337	1.84921	5.0853	4.87764	-1.81399	-1.23101	-1.34221	-1.81399	-1.81399	-1.81399	-1.81399	-1.81399
ENSMUSG00000006498	Ptbp1	Ptbp1	19205	1.10568	8.76777	10.0575	0.00218556	0.0459497	up	8cWT-8cKO	NA	Ptbp1	9.25097	8.81321	8.85422	8.09544	8.0277	8.91881	9.18402	9.98854	9.49008	8.73734	9.87062	9.83576	9.53604	9.83395	7.99219	8.49436	8.40402	7.58346	8.49204	8.78636	7.7276	8.27723	7.83807	7.19504	8.42227	6.84744	8.31923	8.17514	9.03569	8.41884	9.1918	9.42989	9.01414	7.58276	8.80472	4.20578	6.78563
ENSMUSG00000024104	Washc2	Washc2	28006	1.33837	7.27658	11.8099	0.000956508	0.031051	up	8cWT-8cKO	NA	Washc2	5.83186	7.46805	6.7985	8.29104	7.93246	7.53942	8.40037	7.10117	8.49467	7.90844	7.8406	7.59819	8.21249	7.71823	7.11392	7.15943	7.5861	7.63644	7.21424	7.23666	7.5632	6.63113	6.5358	6.17208	6.84532	6.30198	6.6682	6.10183	5.87474	7.97346	7.11375	6.49624	6.16572	5.54445	5.16239	6.68693	5.82022
ENSMUSG00000068739	Sars	Sars	20226	1.96411	6.00684	10.6001	0.00168758	0.0403585	up	8cWT-8cKO	NA	Sars	5.96568	4.70081	5.0686	4.72764	5.73686	5.69	6.58927	7.39582	6.43994	7.75738	6.90521	6.66658	7.27652	6.74809	3.81438	5.69706	5.77969	6.06404	6.46562	5.86522	6.52042	6.2974	3.55854	4.76041	5.82441	6.12388	5.81513	6.23494	1.29108	5.59418	6.20244	5.60554	5.16649	4.88067	4.5379	-1.81399	3.3006
ENSMUSG00000053838	Nudcd3	Nudcd3	209586	2.08225	5.72361	9.97949	0.00226878	0.0462874	up	8cWT-8cKO	NA	Nudcd3	4.98224	4.48547	5.6892	4.21352	6.03241	5.31468	5.99899	6.1404	4.60905	8.90073	6.07217	4.01756	6.5748	4.07703	6.16598	6.16843	6.41592	5.47107	2.37253	6.3252	4.92479	5.17217	5.21849	4.48817	4.55784	6.50758	5.74901	3.60148	4.99518	5.92463	5.18009	3.538	4.84742	4.81764	3.87544	3.17878	2.89938
ENSMUSG00000037071	Scd1	Scd1	20249	2.22214	6.19498	13.1252	0.000522573	0.0232238	up	8cWT-8cKO	NA	Scd1	6.18666	5.56931	6.34328	6.99283	5.1037	4.79105	7.69326	6.55663	7.80001	7.2382	7.75088	5.99843	7.3202	8.22096	3.73979	4.95024	2.19487	5.66256	3.63007	5.32577	4.68981	5.72823	5.27734	4.87378	7.29918	2.89832	5.63802	5.92736	4.8278	5.12992	5.13429	4.73212	5.75751	6.49039	3.56049	-1.81399	5.69257
ENSMUSG00000024712	Rfk	Rfk	54391	2.34385	5.71326	10.9475	0.00143201	0.0370946	up	8cWT-8cKO	NA	Rfk	6.11871	4.92285	4.5485	7.62395	5.56277	7.42301	6.70624	5.48786	6.67765	6.86159	6.85742	7.04126	4.59185	6.02257	5.34384	4.99236	6.37579	5.15857	5.43988	6.33726	1.6734	5.78884	4.67838	5.13448	4.59393	5.43667	3.19823	4.51886	4.61902	2.25899	5.85073	2.29423	0.341761	5.48484	4.46992	1.48047	-1.81399
ENSMUSG00000013415	Igf2bp1	Igf2bp1	140486	3.01131	5.39823	10.958	0.00142491	0.0370946	up	8cWT-8cKO	NA	Igf2bp1	5.40068	3.85476	4.53766	-1.81399	5.71621	3.6977	6.17565	6.41479	7.40732	6.03738	7.71626	4.76701	7.36505	6.16897	1.5279	5.20231	4.7666	4.74342	-1.40834	-1.43989	6.00915	5.66496	2.05661	3.65375	7.19582	3.51596	3.02083	5.48337	0.158614	3.9143	5.10788	1.03182	4.38717	3.86366	3.51969	-1.81399	3.3006
ENSMUSG00000015647	Lama5	Lama5	16776	3.15102	4.65576	10.4362	0.00182422	0.0416489	up	8cWT-8cKO	NA	Lama5	3.50552	0.221383	5.71828	0.109239	0.847977	-0.803809	3.84473	5.9326	5.11102	5.97353	5.69098	6.67709	5.83787	6.46834	3.6155	4.9597	4.54327	2.35508	4.0395	6.17863	5.29637	4.75265	4.64896	3.76334	1.33444	4.08891	4.16506	1.125	4.95705	4.06973	3.31977	3.25178	-0.915587	-1.01655	3.50931	2.40501	-1.81399
ENSMUSG00000108772	NA	ENSMUSG00000108772	NA	5.58536	-0.833785	10.2456	0.00206841	0.044314	up	8cWT-8cKO	NA	ENSMUSG00000108772	-1.81399	-1.81399	-1.81399	2.08939	-1.81399	-1.81399	1.70473	-1.81399	-1.81399	-1.81399	0.83723	-1.35668	-0.242772	0.859381	-0.941477	-1.81399	-1.81399	-1.81399	-1.81399	-1.81399	-1.81399	-1.81399	-1.81399	-1.19357	-1.81399	-1.26118	-1.81399	-1.31136	-1.81399	-1.81399	-1.81399	-1.81399	-1.81399	-1.81399	-1.81399	-1.81399	-1.81399
ENSMUSG00000031351	Zfp185	Zfp185	22673	5.97284	-0.555689	9.71537	0.00265939	0.0489793	up	8cWT-8cKO	NA	Zfp185	-1.81399	1.9893	-1.12177	-1.81399	-1.81399	-1.81399	-1.81399	-1.81399	-1.81399	-1.81399	-0.773871	-1.81399	3.12021	-1.31443	-0.00971152	-1.81399	-1.81399	-1.81399	-1.81399	-1.81399	-1.81399	-1.81399	-1.81399	-0.76113	-1.81399	-1.26118	-1.81399	-0.00631677	-1.81399	-1.81399	-1.81399	-1.81399	-1.81399	-1.81399	-1.81399	-1.81399	-1.81399
ENSMUSG00000075028	Prdm11	Prdm11	100042784	6.20491	-0.713901	11.2244	0.00130928	0.0356797	up	8cWT-8cKO	NA	Prdm11	-0.2056	-1.81399	-1.81399	-1.81399	-1.81399	-0.803809	-1.81399	-1.81399	3.3986	-1.81399	-1.81399	-1.81399	-1.81399	-1.81399	-1.81399	-1.3727	-1.81399	-1.81399	-1.81399	-1.81399	-1.81399	-1.81399	-1.81399	-1.47068	-1.81399	-1.81399	-1.81399	-1.81399	-1.81399	-1.81399	-1.81399	-1.81399	-1.81399	-1.81399	-1.81399	-1.81399	-1.81399
ENSMUSG00000087259	2610035D17Rik	2610035D17Rik	72386	6.37682	-0.555722	10.3625	0.0019576	0.043383	up	8cWT-8cKO	NA	2610035D17Rik	-1.81399	-1.81399	-1.81399	-1.81399	-1.81399	-0.215469	3.48462	-1.81399	-1.35775	-1.81399	-1.81399	-0.118941	-1.81399	-1.81399	-1.81399	-1.81399	-0.792902	-1.81399	-1.81399	-1.81399	-1.81399	-1.81399	-0.881557	0.917595	-1.81399	-1.81399	-1.81399	-1.81399	-1.81399	-1.81399	-1.81399	-1.81399	-1.81399	-1.81399	-1.81399	-1.81399	-1.81399
ENSMUSG00000062074	Ccn6	Ccn6	327743	6.39568	-0.409501	10.2451	0.00206893	0.044314	up	8cWT-8cKO	NA	Ccn6	-0.47096	1.86787	-1.81399	-1.81399	-1.81399	-1.81399	-1.81399	-1.81399	3.58819	-1.81399	-1.81399	-1.81399	-1.81399	-1.81399	-1.81399	-1.81399	-1.81399	-1.81399	-1.81399	-1.81399	-1.81399	-1.81399	-1.81399	-1.81399	-1.81399	-0.294066	-1.81399	-1.31136	-1.14955	-1.81399	-1.81399	-1.81399	-1.81399	-1.81399	-1.81399	-1.81399	-1.81399
ENSMUSG00000019791	Hint3	Hint3	66847	6.48346	2.83562	9.7724	0.00250616	0.0479895	up	8cWT-8cKO	NA	Hint3	-1.81399	-1.81399	-1.81399	6.42734	0.0596176	-1.81399	2.15374	-1.81399	4.19127	6.87563	1.57937	-1.35668	-1.81399	3.59126	2.36956	-1.81399	-1.81399	-1.81399	-1.81399	-1.81399	-1.81399	-1.81399	2.34039	-1.81399	-1.81399	-1.81399	-1.81399	-1.81399	2.86228	-1.81399	-1.81399	-0.0824149	-1.81399	-1.81399	-0.0856931	-1.81399	-1.81399
ENSMUSG00000030539	Sema4b	Sema4b	20352	6.49248	3.63707	14.4525	0.00028746	0.0166062	up	8cWT-8cKO	NA	Sema4b	2.92012	2.59786	-1.12177	-1.81399	5.22558	1.52621	1.87042	5.911	5.1416	2.09255	6.71615	2.07356	-0.824285	6.85755	-1.81399	-1.81399	3.64195	1.92541	-1.09207	-1.81399	0.79662	-1.02569	-1.81399	-1.81399	-0.779127	5.38717	-1.81399	2.88688	-1.81399	-0.10847	0.0885315	-1.34221	-1.81399	-0.505962	0.521833	-1.81399	-1.81399
ENSMUSG00000072663	Spef2	Spef2	320277	6.52046	-0.491973	9.95454	0.00237361	0.0471169	up	8cWT-8cKO	NA	Spef2	-1.81399	-1.45587	-1.81399	-1.81399	-1.81399	-1.81399	3.71998	-1.81399	-1.81399	-1.81399	-1.81399	-1.81399	-1.81399	-1.81399	-1.81399	-1.81399	-1.81399	-1.81399	-1.81399	1.49064	-1.81399	-1.81399	-1.81399	-1.81399	-1.81399	-1.81399	-1.81399	-1.81399	-1.81399	-1.81399	-1.81399	-1.81399	-1.81399	-1.81399	-1.81399	-1.81399	-1.81399
ENSMUSG00000057729	Prtn3	Prtn3	19152	6.54059	-0.525129	10.8473	0.00155998	0.0387823	up	8cWT-8cKO	NA	Prtn3	-1.81399	-1.81399	-1.81399	-1.81399	-1.81399	0.201254	-1.81399	-1.81399	1.69887	0.507634	-1.81399	-1.81399	-1.81399	3.20605	-1.81399	-1.81399	-1.81399	-1.81399	-1.81399	-1.81399	-1.81399	-1.81399	-1.81399	-1.81399	-1.81399	0.112631	-1.81399	-1.81399	-1.81399	-1.81399	-1.81399	-1.81399	-1.81399	-1.81399	-1.81399	-1.81399	-1.81399
ENSMUSG00000028799	Zfp362	Zfp362	230761	6.76065	-0.100591	9.99472	0.00232883	0.0468976	up	8cWT-8cKO	NA	Zfp362	2.77413	-1.81399	-1.81399	-1.81399	-1.81399	-1.81399	-1.81399	3.90034	-1.81399	-0.229281	-1.81399	-1.81399	-1.81399	-1.81399	-1.81399	-1.81399	-1.06013	-1.81399	-1.81399	-1.81399	-1.81399	-1.81399	-1.81399	-1.81399	-1.81399	-1.26118	-1.81399	-1.81399	0.534996	-1.81399	-1.81399	-1.81399	-1.81399	-1.81399	-1.81399	-1.81399	-1.81399
ENSMUSG00000063611	NA	ENSMUSG00000063611	NA	6.88593	-0.0439283	10.1155	0.00219949	0.0460033	up	8cWT-8cKO	NA	ENSMUSG00000063611	2.67887	-1.81399	-1.81399	-1.81399	-1.81399	-1.81399	-1.81399	-1.81399	-1.81399	-1.81399	-1.81399	-1.81399	-1.81399	4.07703	-1.81399	-1.81399	-1.81399	-1.81399	-1.81399	-1.81399	-1.81399	-0.144454	-1.81399	-0.585449	-0.182729	-1.26118	-1.81399	-1.81399	-1.81399	-1.81399	-1.81399	-1.81399	-1.81399	-1.81399	-1.81399	-1.81399	-1.81399
ENSMUSG00000037005	Xpnpep2	Xpnpep2	170745	7.06689	0.0442283	11.9386	0.000942588	0.0309633	up	8cWT-8cKO	NA	Xpnpep2	-1.81399	2.95171	-1.81399	-1.81399	-1.81399	-1.81399	2.49567	-1.2722	1.26313	-1.81399	-0.773871	3.41683	-0.242772	-1.81399	-1.81399	-1.81399	-1.81399	-1.81399	-1.81399	-1.81399	-1.81399	-1.81399	-1.81399	-0.76113	-1.81399	-1.81399	-1.81399	-1.81399	-1.81399	-1.81399	-1.81399	-1.81399	-1.81399	-1.81399	-1.81399	-1.81399	-1.81399
ENSMUSG00000027187	Cat	Cat	12359	7.12098	-0.0582124	10.8558	0.0015538	0.0387678	up	8cWT-8cKO	NA	Cat	-1.81399	-1.81399	0.89572	-1.81399	-1.81399	-1.81399	-1.81399	-1.81399	-1.81399	-1.81399	-1.81399	2.42655	-1.81399	3.88354	-1.46129	-1.81399	-1.81399	-1.81399	-1.81399	-1.81399	-1.81399	-1.81399	1.3107	-1.81399	-1.20569	-1.81399	-1.26137	-1.81399	-0.696359	-1.81399	-1.81399	-1.81399	-1.81399	-1.81399	-1.81399	-1.81399	-1.81399
ENSMUSG00000110298	NA	ENSMUSG00000110298	NA	7.17472	-0.132565	11.6652	0.00106837	0.0326423	up	8cWT-8cKO	NA	ENSMUSG00000110298	-1.81399	-1.81399	-1.81399	-1.81399	-1.81399	1.01077	-1.81399	-1.81399	4.36427	-1.81399	-1.81399	-1.81399	-1.81399	-1.81399	-1.81399	-1.81399	-1.81399	-1.21483	-1.81399	-1.81399	-1.81399	-1.81399	-1.81399	-1.47068	-1.81399	-1.81399	-1.81399	-1.81399	-1.81399	-1.81399	-1.81399	-1.81399	-1.81399	-1.81399	-1.81399	-1.81399	-1.81399
ENSMUSG00000103206	NA	ENSMUSG00000103206	NA	7.19707	1.64616	10.0407	0.00220315	0.0460033	up	8cWT-8cKO	NA	ENSMUSG00000103206	-1.21727	4.4803	-1.81399	-1.81399	-1.81399	-1.81399	-1.05064	3.14399	-1.81399	-1.81399	6.085	-1.81399	-1.81399	-0.19626	-1.46129	-1.81399	2.42202	-1.81399	-1.81399	-1.1431	-1.81399	-1.02569	-1.81399	-1.81399	-0.779127	-1.81399	-1.81399	-1.81399	-1.81399	-1.81399	-1.81399	-0.987281	-1.81399	-1.81399	-1.44755	-1.81399	-1.81399
ENSMUSG00000003559	As3mt	As3mt	57344	7.23281	-0.12852	12.355	0.000779708	0.0281118	up	8cWT-8cKO	NA	As3mt	-1.81399	-1.81399	-1.81399	-1.81399	-1.81399	0.7879	-1.81399	4.07694	-1.35775	1.3556	-1.81399	-1.81399	-1.81399	1.33362	-1.81399	-1.81399	-1.81399	-1.81399	-1.81399	-1.81399	-1.81399	-1.81399	-1.81399	-1.81399	-1.81399	-0.862492	-1.81399	-1.81399	-1.81399	-1.81399	-1.81399	-1.81399	-1.81399	-1.81399	-1.81399	-1.81399	-1.81399
ENSMUSG00000043587	Pxylp1	Pxylp1	235534	7.37979	0.684094	9.69019	0.00260741	0.0486032	up	8cWT-8cKO	NA	Pxylp1	1.02342	-1.81399	-1.81399	-1.81399	-1.81399	-1.81399	-1.81399	-1.81399	-1.01165	5.42404	-1.81399	-1.81399	-1.81399	-1.81399	-1.1781	-1.81399	-1.81399	2.68572	-1.81399	-1.81399	-1.81399	-1.81399	-1.81399	-0.961208	-1.81399	0.112631	-1.26137	-1.81399	-1.81399	-1.81399	-1.81399	-1.81399	-1.81399	-1.81399	-1.44755	-1.81399	-1.81399
ENSMUSG00000032092	Mpzl2	Mpzl2	14012	7.53194	0.786182	10.778	0.00155123	0.0387678	up	8cWT-8cKO	NA	Mpzl2	-1.81399	-0.111763	-1.81399	-1.81399	-1.81399	-1.81399	2.64038	-0.879239	-1.81399	-1.81399	-1.81399	-0.496733	4.68913	3.73845	-1.81399	-1.81399	-0.792902	2.8114	-1.81399	-1.81399	-1.81399	-1.81399	-1.81399	-1.81399	-1.81399	-1.81399	-1.81399	-1.31136	-1.81399	-1.81399	-1.49325	-1.81399	-1.81399	-1.81399	-1.81399	-1.81399	-1.81399
ENSMUSG00000057411	Antkmt	Antkmt	214917	7.67551	0.137526	11.9547	0.00105549	0.0323678	up	8cWT-8cKO	NA	Antkmt	-1.81399	-1.81399	-1.12177	-1.81399	-1.81399	-1.81399	-1.81399	2.78561	4.1996	-1.81399	-1.81399	2.1445	-1.81399	-1.81399	-1.81399	-1.81399	-1.81399	-1.81399	-1.81399	-1.81399	-1.81399	-1.81399	-1.81399	-1.81399	-1.81399	-1.81399	-1.81399	-1.81399	-1.81399	-1.81399	-1.81399	-1.81399	-1.81399	-1.81399	-1.81399	-1.81399	-1.81399
ENSMUSG00000054715	Zscan22	Zscan22	232878	8.07653	1.61237	10.9733	0.00147109	0.0375604	up	8cWT-8cKO	NA	Zscan22	-1.81399	-1.81399	-1.81399	-1.81399	-1.81399	5.92045	-1.81399	-1.81399	-1.81399	-1.81399	-1.81399	5.25776	-1.81399	-1.31443	-1.46129	-1.81399	-1.81399	-1.81399	2.02517	-1.81399	-1.81399	-1.81399	-1.81399	-1.81399	-1.81399	-1.26118	-1.81399	-1.81399	-1.81399	-1.81399	-1.81399	-1.81399	-1.81399	-1.81399	-1.81399	-1.81399	-1.81399
ENSMUSG00000026825	Dnm1	Dnm1	13429	8.87491	1.14735	12.5174	0.000724367	0.0271164	up	8cWT-8cKO	NA	Dnm1	-1.81399	-1.81399	1.14456	-1.81399	-1.81399	-1.81399	-1.81399	-1.81399	-1.81399	-1.81399	6.06572	-1.81399	-1.81399	-1.81399	-1.81399	-1.81399	-1.81399	-1.81399	-1.09207	-1.81399	-1.81399	-1.81399	-1.81399	1.8359	-1.81399	-1.26118	-1.81399	-1.81399	-1.81399	-1.81399	-1.81399	-1.81399	-1.81399	-1.81399	-1.81399	-1.81399	-1.81399
ENSMUSG00000087368	BC065397	BC065397	436230	8.9933	1.2479	13.8862	0.00039251	0.0197694	up	8cWT-8cKO	NA	BC065397	-1.81399	-1.81399	-1.81399	-1.81399	0.847977	-1.81399	5.12912	-1.81399	-0.732722	-0.229281	5.20705	-1.35668	-1.81399	-1.81399	-1.81399	-1.81399	-1.38837	-1.81399	-1.81399	-1.81399	-1.81399	-1.81399	-1.81399	-1.81399	-1.81399	1.10003	-1.81399	1.125	-1.81399	-1.81399	-1.81399	-1.81399	-1.81399	-1.81399	-1.81399	-1.81399	-1.81399
ENSMUSG00000073243	Gm9	Gm9	194854	7.15931	3.74039	12.7083	0.00071936	0.0269898	up	2cWT-2cKO:8cWT-8cKO	8cWT-2cWT:8cKO-2cKO	Gm9	5.47345	5.47629	7.10783	7.50283	3.44538	2.01221	-1.05064	3.05679	-1.35775	0.507634	-1.81399	-1.35668	-1.81399	3.41147	-1.81399	-1.81399	-0.792902	-1.81399	4.48246	-1.81399	-1.81399	3.35184	-1.81399	-0.961208	-1.20569	-1.81399	-1.81399	-1.81399	3.67373	-1.81399	-1.81399	-1.81399	-1.81399	-1.81399	-1.81399	-1.81399	-1.81399
ENSMUSG00000073243	Gm9	Gm9	194854	7.15931	3.74039	12.7083	0.00071936	0.0269898	up	2cWT-2cKO:8cWT-8cKO	8cWT-2cWT:8cKO-2cKO	Gm9	5.47345	5.47629	7.10783	7.50283	3.44538	2.01221	-1.05064	3.05679	-1.35775	0.507634	-1.81399	-1.35668	-1.81399	3.41147	-1.81399	-1.81399	-0.792902	-1.81399	4.48246	-1.81399	-1.81399	3.35184	-1.81399	-0.961208	-1.20569	-1.81399	-1.81399	-1.81399	3.67373	-1.81399	-1.81399	-1.81399	-1.81399	-1.81399	-1.81399	-1.81399	-1.81399
ENSMUSG00000019487	Trip10	Trip10	106628	5.9735	2.89237	12.3147	0.000757317	0.0275435	up	2cWT-2cKO:8cWT-8cKO	NA	Trip10	-1.81399	3.31909	-1.81399	-1.81399	-1.81399	2.52722	-1.81399	4.70486	5.59115	1.6451	5.78044	5.60138	5.27402	4.6839	-1.81399	-1.81399	-1.81399	-1.81399	-1.81399	-1.81399	-1.0235	-1.81399	-1.81399	-1.19357	-1.81399	-1.26118	0.279313	-1.81399	-1.81399	-0.487658	1.22517	-1.81399	-1.81399	-0.505962	-1.81399	-0.13463	-1.81399
ENSMUSG00000036533	Cdc42ep3	Cdc42ep3	260409	7.75134	2.89221	14.971	0.000228322	0.0144845	up	2cWT-2cKO:8cWT-8cKO	NA	Cdc42ep3	3.83501	-1.81399	-1.81399	7.42495	0.847977	4.06393	-1.05064	0.774235	0.03551	-1.81399	5.74046	2.94669	-1.81399	-1.81399	-1.46129	-1.81399	-1.38837	-1.81399	-1.40834	0.976891	-1.81399	-1.81399	-1.81399	0.353552	-1.81399	-1.81399	-1.26137	-1.81399	-1.81399	-1.81399	-1.81399	-1.34221	-1.81399	-1.81399	-1.81399	-1.81399	-1.81399
ENSMUSG00000019487	Trip10	Trip10	106628	5.9735	2.89237	12.3147	0.000757317	0.0275435	up	2cWT-2cKO:8cWT-8cKO	NA	Trip10	-1.81399	3.31909	-1.81399	-1.81399	-1.81399	2.52722	-1.81399	4.70486	5.59115	1.6451	5.78044	5.60138	5.27402	4.6839	-1.81399	-1.81399	-1.81399	-1.81399	-1.81399	-1.81399	-1.0235	-1.81399	-1.81399	-1.19357	-1.81399	-1.26118	0.279313	-1.81399	-1.81399	-0.487658	1.22517	-1.81399	-1.81399	-0.505962	-1.81399	-0.13463	-1.81399
ENSMUSG00000036533	Cdc42ep3	Cdc42ep3	260409	7.75134	2.89221	14.971	0.000228322	0.0144845	up	2cWT-2cKO:8cWT-8cKO	NA	Cdc42ep3	3.83501	-1.81399	-1.81399	7.42495	0.847977	4.06393	-1.05064	0.774235	0.03551	-1.81399	5.74046	2.94669	-1.81399	-1.81399	-1.46129	-1.81399	-1.38837	-1.81399	-1.40834	0.976891	-1.81399	-1.81399	-1.81399	0.353552	-1.81399	-1.81399	-1.26137	-1.81399	-1.81399	-1.81399	-1.81399	-1.34221	-1.81399	-1.81399	-1.81399	-1.81399	-1.81399
ENSMUSG00000021255	Esrrb	Esrrb	26380	1.57594	7.17199	11.2159	0.00126215	0.035432	up	2cWT-2cKO:8cWT-8cKO:8cWT-2cWT:8cKO-2cKO	NA	Esrrb	6.90567	6.34229	6.92448	7.52788	7.33033	6.47302	7.72201	8.24298	9.00945	8.26645	8.26649	9.19929	8.50966	8.22834	5.05347	6.52792	5.13443	6.25592	4.27791	3.16286	4.7688	4.94892	6.05934	3.04103	7.0508	4.10013	5.44491	6.19582	5.50362	7.45131	7.2448	7.44471	7.5068	7.43485	6.53869	3.27529	3.61418
ENSMUSG00000021255	Esrrb	Esrrb	26380	1.57594	7.17199	11.2159	0.00126215	0.035432	up	2cWT-2cKO:8cWT-8cKO:8cWT-2cWT:8cKO-2cKO	NA	Esrrb	6.90567	6.34229	6.92448	7.52788	7.33033	6.47302	7.72201	8.24298	9.00945	8.26645	8.26649	9.19929	8.50966	8.22834	5.05347	6.52792	5.13443	6.25592	4.27791	3.16286	4.7688	4.94892	6.05934	3.04103	7.0508	4.10013	5.44491	6.19582	5.50362	7.45131	7.2448	7.44471	7.5068	7.43485	6.53869	3.27529	3.61418
ENSMUSG00000041571	Selenow	Selenow	20364	3.18364	5.32398	14.6745	0.000260406	0.0157093	up	8cWT-8cKO:8cWT-2cWT	2cWT-2cKO	Selenow	3.89276	0.00803897	0.214167	-1.81399	1.35488	1.78958	4.16493	6.68395	7.0245	6.92372	6.54104	6.8843	6.95003	7.45832	3.67008	4.91661	6.1545	2.68572	6.32812	5.16241	3.46928	5.97108	4.84976	4.22486	4.06106	5.34065	5.34949	3.28798	3.26314	3.21548	4.22453	2.44757	2.56951	-0.129601	0.885171	5.84036	-1.81399
ENSMUSG00000021553	Slc28a3	Slc28a3	114304	5.52597	4.3632	14.317	0.00031896	0.0179103	up	8cWT-8cKO:8cWT-2cWT	2cWT-2cKO	Slc28a3	-1.81399	-1.81399	-1.81399	-1.81399	0.0596176	-1.81399	3.6071	5.37972	5.66219	7.0405	8.18692	3.5138	4.62501	6.04845	0.298174	-1.81399	-1.81399	-1.81399	-1.40834	2.60729	5.71071	0.792283	-1.81399	2.14091	4.83917	-0.550463	3.94648	-0.643817	-1.81399	-0.487658	2.33013	-1.34221	0.341761	-1.01655	-1.81399	-1.81399	3.11389
ENSMUSG00000092274	Neat1	Neat1	66961	4.11232	5.38341	21.2839	1.56762e-05	0.00268612	up	8cWT-8cKO:8cWT-2cWT	2cWT-2cKO:8cKO-2cKO	Neat1	3.44891	-1.45587	2.93352	0.109239	-1.81399	-0.803809	5.54531	5.5003	4.61529	4.01853	6.27049	6.13317	7.10202	5.15335	6.92766	5.27615	0.805949	5.91097	6.60352	5.83575	5.68766	4.03674	5.47047	7.36449	1.64081	7.81366	5.93266	6.1556	4.80222	1.61893	3.8806	-0.261079	1.00323	1.25298	1.06606	0.620496	-1.81399
ENSMUSG00000017491	Rarb	Rarb	218772	7.38674	1.84464	13.0115	0.000605346	0.0249841	up	8cWT-8cKO:8cWT-2cWT	2cWT-2cKO:8cKO-2cKO	Rarb	-1.81399	-1.81399	-1.81399	-1.81399	-1.81399	-1.81399	0.903979	3.49858	-1.81399	-1.81399	0.245778	0.639068	-0.824285	3.13051	3.55877	-0.00470468	2.31291	5.15857	3.38432	3.94848	3.82661	-1.81399	-1.81399	1.48844	-0.450327	-1.81399	1.4888	-0.643817	-1.81399	-1.81399	-1.81399	-1.81399	-1.81399	-1.81399	-1.81399	-1.81399	-1.81399
ENSMUSG00000033530	Ttc7b	Ttc7b	104718	2.33406	5.99831	11.7759	0.00097177	0.0312414	up	8cWT-8cKO:8cWT-2cWT	8cKO-2cKO	Ttc7b	5.65126	4.41677	4.83186	1.79137	6.19045	3.59814	3.6071	7.32761	5.03857	6.65731	7.52242	6.67858	6.93358	7.70446	6.75115	5.28748	6.94317	6.44235	5.31493	6.4856	5.16067	7.0668	4.74939	5.62239	5.95503	6.60723	6.10393	5.27391	6.1325	4.32252	6.22583	5.96188	1.00323	4.17994	1.2766	-1.81399	1.42041
ENSMUSG00000020481	Ankrd36	Ankrd36	76389	5.70793	2.24341	9.97707	0.00227142	0.0462874	up	8cWT-8cKO:8cWT-2cWT	8cKO-2cKO	Ankrd36	-1.81399	-0.72516	-1.81399	-1.81399	-1.81399	-1.81399	0.351813	4.65377	-1.35775	-1.81399	-1.81399	-1.00997	-1.81399	-1.31443	-0.258838	2.39802	4.46892	-1.81399	2.12016	3.63318	3.8682	-0.144454	-0.104157	0.0682993	4.93373	3.7758	-0.550807	4.98627	0.158614	-1.81399	-1.81399	-1.34221	-1.81399	-1.81399	-1.15558	-1.81399	-1.81399
ENSMUSG00000069662	Marcks	Marcks	17118	6.69893	2.56317	12.596	0.000665459	0.0257339	up	8cWT-8cKO:8cWT-2cWT	8cKO-2cKO	Marcks	0.67414	-1.1692	-1.81399	-1.81399	-1.81399	-1.81399	-1.81399	5.36618	4.77432	1.8861	2.96264	3.80408	-1.81399	4.52337	1.31605	1.33525	-0.792902	-1.81399	3.3715	-1.81399	0.79662	3.43694	1.5837	2.91516	-1.81399	4.9337	-1.26137	1.47181	4.25424	-1.00349	-1.49325	-1.81399	-1.81399	-1.81399	-1.44755	-1.81399	0.566096
ENSMUSG00000055632	Hmcn2	Hmcn2	665700	6.76705	1.91418	10.3313	0.0019653	0.0434772	up	8cWT-8cKO:8cWT-2cWT	8cKO-2cKO	Hmcn2	-1.81399	-1.81399	-1.81399	-1.81399	-1.81399	-1.81399	-1.81399	4.64633	3.35452	-0.229281	0.245778	2.2767	-1.81399	3.51905	-1.81399	1.01033	-1.81399	3.85669	-1.81399	2.54621	-1.0235	-1.02569	-1.81399	3.3637	0.702058	5.3963	-1.81399	-1.31136	-1.81399	-1.81399	-1.49325	-1.81399	-0.915587	-1.81399	-1.81399	-1.81399	-1.81399
ENSMUSG00000047171	Helt	Helt	234219	7.05878	-0.073646	9.81803	0.00260221	0.0486032	up	8cWT-8cKO:8cWT-2cWT	8cKO-2cKO	Helt	-1.81399	-1.81399	-1.81399	-1.81399	-1.81399	-1.81399	-1.81399	-1.81399	4.2486	-1.81399	-1.81399	-1.81399	-1.81399	-1.81399	-0.128904	-1.81399	-1.81399	-1.81399	-1.81399	-1.81399	-1.81399	-1.81399	-1.81399	-1.47068	-1.81399	2.13789	-1.81399	-1.81399	-1.81399	-1.81399	-1.81399	-1.81399	-1.81399	-1.81399	-1.81399	-1.81399	-1.81399
ENSMUSG00000024334	H2-Oa	H2-Oa	15001	7.11785	1.1503	9.77335	0.00256177	0.0483772	up	8cWT-8cKO:8cWT-2cWT	8cKO-2cKO	H2-Oa	-1.81399	-1.81399	-1.81399	-1.81399	-1.81399	-1.81399	-1.81399	-1.81399	3.09354	-1.81399	0.571603	-1.35668	-1.81399	4.72299	-1.81399	-1.81399	3.95502	-1.21483	-1.81399	-0.062008	-1.81399	-1.81399	-0.881557	2.55143	3.66272	-1.81399	-1.81399	-1.31136	-1.81399	-1.81399	-1.81399	-1.81399	-1.81399	-1.81399	-1.44755	-1.81399	-1.81399
ENSMUSG00000023495	Pcbp4	Pcbp4	59092	7.20885	0.732611	10.1675	0.00220862	0.0460329	up	8cWT-8cKO:8cWT-2cWT	8cKO-2cKO	Pcbp4	-1.81399	-1.81399	-1.81399	-1.81399	-1.81399	-1.81399	-1.81399	0.0869953	0.177225	-1.81399	4.26396	-1.81399	-0.824285	-1.31443	-1.46129	-0.532292	1.09671	-1.81399	-1.81399	-1.81399	-1.81399	-0.144454	-1.81399	-1.81399	-1.81399	3.09051	-1.81399	4.22171	-1.81399	-1.81399	-1.81399	-1.81399	-1.81399	-1.81399	-1.81399	-1.81399	-1.81399
ENSMUSG00000028944	Prkag2	Prkag2	108099	7.30471	2.05229	11.9402	0.000900399	0.0304818	up	8cWT-8cKO:8cWT-2cWT	8cKO-2cKO	Prkag2	-1.81399	-1.81399	-1.12177	-1.81399	0.0596176	-1.81399	5.8777	-1.2722	3.99467	-1.81399	-1.81399	0.907316	-1.81399	0.950052	-1.81399	-1.81399	1.92514	-1.81399	1.77569	-1.43989	-1.81399	3.40912	-1.81399	3.7552	4.576	-1.26118	-1.26137	-0.00631677	3.10476	-1.81399	-1.81399	-1.81399	-0.915587	-1.81399	-1.44755	-1.81399	-1.81399
ENSMUSG00000022683	Pla2g10	Pla2g10	26565	7.34163	0.480245	10.1735	0.00220247	0.0460033	up	8cWT-8cKO:8cWT-2cWT	8cKO-2cKO	Pla2g10	-1.81399	-1.81399	-1.81399	-1.81399	-1.81399	-1.81399	4.2576	1.15626	0.03551	-0.229281	-0.773871	-1.35668	-0.824285	-1.31443	-1.81399	-1.81399	-1.06013	-1.81399	-1.81399	-1.81399	-1.81399	-1.81399	-1.81399	-1.81399	-1.81399	-1.81399	-1.81399	4.13676	-1.81399	-1.81399	-1.81399	-1.81399	-1.81399	-1.81399	-1.81399	-1.81399	-1.81399
ENSMUSG00000030730	Atp2a1	Atp2a1	11937	7.34966	0.8122	9.84185	0.00257319	0.0483812	up	8cWT-8cKO:8cWT-2cWT	8cKO-2cKO	Atp2a1	-1.81399	-1.81399	-1.81399	-1.81399	-1.81399	-1.81399	-1.81399	-1.81399	-1.81399	-1.81399	-1.81399	-1.81399	4.33556	1.79152	-1.81399	-1.81399	-1.81399	-1.21483	-1.09207	0.37261	-1.81399	-1.02569	-1.81399	3.52561	-1.81399	4.18684	-1.81399	-1.81399	-1.81399	-1.81399	-1.81399	-1.81399	-1.81399	-1.81399	-1.81399	-1.81399	-1.81399
ENSMUSG00000021983	Atp8a2	Atp8a2	50769	7.40406	1.15302	9.89473	0.00241766	0.0472166	up	8cWT-8cKO:8cWT-2cWT	8cKO-2cKO	Atp8a2	-1.81399	-1.81399	-1.81399	-1.81399	-1.81399	-1.81399	-1.81399	0.537079	0.306256	5.32518	-1.81399	-1.81399	-1.81399	-1.31443	-1.81399	-1.03526	0.63516	-0.200781	-1.81399	-1.81399	-0.51573	-1.81399	-1.81399	-1.81399	-1.81399	4.82299	0.279313	-1.81399	-1.81399	-1.81399	-1.49325	-1.81399	-1.81399	-1.81399	-1.81399	-1.81399	-1.81399
ENSMUSG00000046110	Serinc4	Serinc4	574418	7.44125	0.476955	10.3495	0.00202883	0.0440878	up	8cWT-8cKO:8cWT-2cWT	8cKO-2cKO	Serinc4	-1.81399	-1.81399	-1.81399	-1.81399	-1.81399	-1.81399	-1.81399	-1.81399	-1.81399	-1.81399	4.63927	-1.81399	-1.81399	-1.81399	-1.81399	0.684659	-1.81399	-1.21483	1.32227	1.09532	-1.0235	-1.81399	-1.81399	3.38496	-1.20569	-1.81399	-1.81399	-1.81399	-1.14955	-1.81399	-1.81399	-1.81399	-1.81399	-1.81399	-1.81399	-1.81399	-1.81399
ENSMUSG00000042655	Shisal2b	Shisal2b	77803	7.44522	0.204669	10.47	0.00191821	0.0429107	up	8cWT-8cKO:8cWT-2cWT	8cKO-2cKO	Shisal2b	-1.81399	-1.81399	-1.81399	-1.81399	-1.81399	-1.81399	2.89241	3.74164	1.44229	-1.81399	-1.81399	1.13342	-1.81399	-1.81399	-1.81399	2.78639	-1.81399	-1.81399	-1.81399	-1.81399	-1.81399	-1.81399	-1.81399	-1.81399	-1.81399	-1.81399	-1.81399	-1.81399	-1.81399	-1.81399	-1.81399	-1.81399	-1.81399	-1.81399	-1.81399	-1.81399	-1.81399
ENSMUSG00000018570	2810408A11Rik	2810408A11Rik	70419	7.4729	0.161634	10.1774	0.00219846	0.0460033	up	8cWT-8cKO:8cWT-2cWT	8cKO-2cKO	2810408A11Rik	-1.81399	-1.81399	-1.81399	-1.81399	-1.81399	-1.81399	4.65974	-1.81399	-1.35775	-1.81399	-1.81399	-1.81399	-1.81399	-1.81399	-1.81399	-1.81399	-1.81399	-1.81399	-1.81399	-1.81399	-1.81399	-1.81399	-1.81399	2.14091	-1.81399	0.565203	-1.81399	-1.81399	-1.81399	-1.81399	-1.81399	-1.81399	-1.81399	-1.81399	-1.81399	-1.81399	-1.81399
ENSMUSG00000029762	Akr1b8	Akr1b8	14187	7.50385	1.40611	11.9465	0.000897768	0.0304818	up	8cWT-8cKO:8cWT-2cWT	8cKO-2cKO	Akr1b8	-1.81399	-1.81399	-1.81399	-1.81399	0.0596176	-1.81399	2.33481	4.34882	3.1462	1.6451	4.3301	2.2767	-1.81399	3.07115	-1.1781	1.14919	-1.81399	-1.81399	-1.81399	-1.43989	-1.0235	-1.81399	-0.57353	-1.81399	2.00481	-1.81399	-1.81399	3.45323	-1.81399	-1.81399	-1.81399	-1.81399	-0.915587	-1.81399	-1.81399	-1.81399	-1.81399
ENSMUSG00000085824	Platr9	Platr9	73696	7.57605	1.0525	9.86565	0.00254454	0.048244	up	8cWT-8cKO:8cWT-2cWT	8cKO-2cKO	Platr9	-1.81399	-1.81399	-1.81399	-1.81399	-1.81399	-1.81399	-1.81399	-1.81399	4.76312	-1.81399	-1.81399	-1.81399	-1.81399	-1.81399	-1.81399	-1.81399	1.84902	-1.81399	-1.81399	-1.81399	-1.81399	-1.81399	1.52014	-0.961208	-1.81399	3.81716	-1.81399	-1.81399	4.20303	-1.81399	-1.81399	-1.81399	-1.81399	-1.81399	-1.81399	-1.81399	-1.81399
ENSMUSG00000105734	4930558C23Rik	4930558C23Rik	67654	7.73811	1.22156	9.87168	0.00253732	0.048244	up	8cWT-8cKO:8cWT-2cWT	8cKO-2cKO	4930558C23Rik	-1.81399	-1.81399	-1.81399	-1.81399	-1.81399	-1.81399	-1.81399	-1.81399	-1.81399	-1.81399	-1.81399	-1.81399	4.93372	-1.81399	-1.81399	-1.81399	-1.81399	-1.81399	-1.81399	-1.1431	-1.81399	-1.81399	2.78095	-1.47068	-1.81399	-1.81399	3.39311	-1.81399	4.8278	-1.81399	-1.81399	-1.81399	-1.81399	-1.81399	-1.81399	-1.81399	-1.81399
ENSMUSG00000022965	Ifngr2	Ifngr2	15980	7.96007	1.26342	12.0271	0.000905237	0.0305191	up	8cWT-8cKO:8cWT-2cWT	8cKO-2cKO	Ifngr2	-1.81399	-1.45587	-1.81399	-1.81399	-1.81399	-1.81399	-1.05064	4.8086	0.306256	-1.81399	-1.81399	2.10947	-1.81399	1.33362	-1.81399	4.40923	-1.81399	-0.466615	-1.40834	-1.81399	-1.81399	-1.81399	-1.81399	1.70677	-1.81399	4.1223	-1.81399	-1.81399	-1.81399	-1.81399	-1.81399	-1.81399	-1.81399	-1.81399	-1.81399	-1.81399	-1.81399
ENSMUSG00000034706	Dnaic2	Dnaic2	432611	8.08374	1.38598	11.1946	0.00137299	0.0366299	up	8cWT-8cKO:8cWT-2cWT	8cKO-2cKO	Dnaic2	-1.81399	-1.81399	-1.81399	-1.81399	-1.81399	-1.81399	-1.81399	-1.81399	0.177225	-1.81399	5.24183	-1.81399	-1.81399	-1.31443	-1.81399	-1.3727	3.61921	-1.81399	-1.81399	-1.81399	-1.81399	-1.81399	1.5837	-1.81399	3.66272	4.1223	-1.81399	-1.81399	1.71322	-1.81399	-1.81399	-1.81399	-1.81399	-1.81399	-1.81399	-1.81399	-1.81399
ENSMUSG00000071176	Arhgef10	Arhgef10	234094	8.19458	1.37319	10.9005	0.00157172	0.0388466	up	8cWT-8cKO:8cWT-2cWT	8cKO-2cKO	Arhgef10	-1.81399	-1.81399	-1.81399	-1.81399	-1.81399	-1.81399	-1.81399	4.97244	-1.81399	-1.81399	-1.81399	3.40243	-1.81399	-1.81399	-1.81399	-1.81399	0.63516	0.680031	-1.81399	-1.81399	-0.51573	-1.81399	-1.81399	5.29471	-1.81399	-1.81399	-1.81399	-0.939318	-1.81399	-1.81399	-1.81399	-1.81399	-1.81399	-1.81399	-1.81399	-1.81399	-1.81399
ENSMUSG00000083722	NA	ENSMUSG00000083722	NA	8.69703	1.58028	12.8785	0.00064217	0.0254738	up	8cWT-8cKO:8cWT-2cWT	8cKO-2cKO	ENSMUSG00000083722	-1.81399	-1.81399	-1.81399	-1.81399	-1.81399	-1.81399	-1.81399	2.5182	3.96566	-1.81399	-1.81399	-1.81399	5.25296	-0.944065	-1.46129	-1.81399	1.96175	-1.81399	-1.81399	-1.81399	1.6734	2.91101	-1.81399	3.84232	-1.81399	-1.81399	-1.81399	3.69688	-1.81399	-1.81399	-1.81399	-1.81399	-1.81399	-1.81399	-1.81399	-1.81399	-1.81399
ENSMUSG00000085396	Firre	Firre	103012	8.69993	1.09168	13.5357	0.000480268	0.0221737	up	8cWT-8cKO:8cWT-2cWT	8cKO-2cKO	Firre	-1.81399	-1.81399	-1.81399	-1.81399	-1.81399	-1.81399	2.49567	4.88654	3.48292	-1.81399	1.06147	-1.81399	1.75204	3.13051	-1.81399	-1.81399	-1.81399	-1.81399	-1.81399	-1.81399	-1.81399	-1.81399	-1.81399	2.26076	-0.779127	-1.81399	1.90141	-1.81399	-1.81399	-1.81399	-1.81399	-1.81399	-1.81399	-1.81399	-1.81399	-1.81399	-1.81399
ENSMUSG00000036745	Ttll7	Ttll7	70892	8.71927	1.26461	12.9877	0.000611788	0.0249841	up	8cWT-8cKO:8cWT-2cWT	8cKO-2cKO	Ttll7	-1.81399	-1.81399	-1.81399	-1.81399	-1.81399	-1.81399	-1.81399	-1.81399	-1.81399	-1.81399	5.86468	-1.81399	-1.81399	1.1159	-1.81399	2.12265	1.02933	-1.81399	-1.40834	-0.062008	1.6734	2.60266	-1.81399	1.70677	-1.81399	-1.81399	-1.81399	-1.81399	-0.0742253	-1.81399	-1.81399	-1.81399	-1.81399	-1.81399	-1.81399	-1.81399	-1.81399
ENSMUSG00000035486	Plk5	Plk5	216166	8.76696	1.10427	14.041	0.000366537	0.0188613	up	8cWT-8cKO:8cWT-2cWT	8cKO-2cKO	Plk5	-1.81399	-1.81399	-1.12177	-1.81399	-1.81399	-1.81399	1.04933	-0.100777	3.74439	-1.81399	-1.81399	4.00808	-0.242772	4.90967	-1.81399	-1.81399	-1.81399	-1.21483	-1.81399	-1.81399	-1.81399	-1.81399	-1.81399	-1.81399	-1.81399	2.55138	-1.81399	-1.81399	-1.81399	-1.81399	-1.81399	-1.81399	-1.81399	-1.81399	-1.81399	-1.81399	-1.81399
ENSMUSG00000030724	Cd19	Cd19	12478	9.20514	2.15466	13.8379	0.000400992	0.0198952	up	8cWT-8cKO:8cWT-2cWT	8cKO-2cKO	Cd19	-1.21727	-1.81399	-1.81399	-1.81399	-1.81399	-0.803809	-1.81399	-1.2722	-1.81399	6.35054	0.571603	-1.81399	0.975669	-1.81399	-0.560154	-1.81399	-1.06013	-1.81399	-1.81399	0.171606	-1.81399	-1.81399	-1.81399	-1.47068	-1.81399	5.86257	-1.81399	3.58732	-1.14955	-1.81399	-1.81399	-1.81399	-1.81399	-1.81399	-1.81399	-1.81399	-1.81399
ENSMUSG00000021095	Gsc	Gsc	14836	9.23297	2.75855	19.2909	3.82343e-05	0.00474248	up	8cWT-8cKO:8cWT-2cWT	8cKO-2cKO	Gsc	-1.81399	-1.81399	-1.81399	-1.81399	-1.81399	-1.81399	1.18137	5.11955	3.1462	3.85806	6.66581	-1.81399	4.21005	4.96507	-1.81399	-1.81399	-1.81399	-1.21483	-0.254201	0.275606	-1.81399	0.398643	-1.81399	-1.81399	-1.20569	3.98385	2.34005	-1.31136	2.82889	-1.81399	-1.81399	-1.81399	-1.81399	-1.01655	-1.81399	-1.81399	-1.81399
ENSMUSG00000039824	Myl6b	Myl6b	216459	9.2925	1.84564	14.3223	0.000340657	0.0186091	up	8cWT-8cKO:8cWT-2cWT	8cKO-2cKO	Myl6b	-1.81399	-1.81399	-1.81399	-1.81399	-1.81399	-1.81399	5.79765	4.63131	2.90265	0.993039	-1.81399	-1.35668	-1.81399	-1.31443	-1.81399	4.50286	0.805949	2.89897	-1.81399	-1.81399	-1.81399	0.398643	-1.81399	-0.428858	-1.81399	-1.81399	-1.81399	-1.81399	-1.81399	-1.81399	-1.81399	-1.81399	-1.81399	-1.81399	-1.81399	-1.81399	-1.81399
ENSMUSG00000020220	Vps13d	Vps13d	230895	1.22995	7.90329	14.6552	0.000262656	0.0157093	up	8cWT-8cKO:8cWT-2cWT	NA	Vps13d	7.77171	7.75755	7.20863	8.20045	7.43513	7.55942	9.06885	8.81156	8.06399	8.90929	8.89538	9.23198	8.48503	7.96309	8.26651	6.87045	7.02977	7.36253	7.67561	7.95942	7.46156	8.10915	6.61399	7.04117	7.81133	7.13191	7.0685	7.68114	7.49948	8.00149	8.2176	6.52238	6.76026	8.0768	7.38997	7.06991	7.04282
ENSMUSG00000022995	Enah	Enah	13800	1.48588	8.10825	20.8501	1.87169e-05	0.00291225	up	8cWT-8cKO:8cWT-2cWT	NA	Enah	7.25023	7.17354	7.04608	5.60686	7.20997	7.93249	9.34228	9.29595	9.18726	9.29088	9.96514	9.14355	8.50075	9.62944	7.44393	7.13457	7.3784	7.14098	7.22497	7.93531	6.80376	6.61904	7.59946	8.03458	6.98946	6.88521	7.10929	7.09259	6.18952	7.8039	8.48782	7.95821	7.357	8.45107	8.2872	6.37473	6.87655
ENSMUSG00000025153	Fasn	Fasn	14104	1.85616	6.82591	14.3147	0.000305689	0.0174002	up	8cWT-8cKO:8cWT-2cWT	NA	Fasn	6.04741	6.56742	6.82548	6.6829	4.20721	6.67385	8.05999	7.18966	7.99627	6.49397	8.78376	8.78474	7.71996	6.2954	2.78674	6.82843	5.23131	5.96945	6.15946	5.41672	7.17502	5.73385	6.22548	5.79313	6.48831	7.3366	6.45117	7.22766	6.36866	6.79324	5.91817	4.2881	6.21427	6.68541	4.48589	4.10433	7.00302
ENSMUSG00000040761	Spen	Spen	56381	2.08427	7.50273	20.0723	2.57803e-05	0.00351224	up	8cWT-8cKO:8cWT-2cWT	NA	Spen	6.97749	7.92245	6.10347	6.76947	7.62431	5.5725	9.06831	8.42593	7.46892	8.37669	9.67664	8.93956	8.81999	8.6875	5.56879	7.33245	6.53001	6.45445	6.60489	6.09936	6.96102	6.2936	7.66153	6.07568	7.71834	6.17516	4.84257	6.75219	6.06957	8.65661	5.73083	5.70016	5.72436	5.42971	7.13533	1.77269	6.52958
ENSMUSG00000060012	Kif13b	Kif13b	16554	2.80309	5.97575	18.5555	4.85679e-05	0.00545007	up	8cWT-8cKO:8cWT-2cWT	NA	Kif13b	5.35005	4.43826	2.32562	2.547	0.0596176	5.26143	8.36087	7.86796	6.69543	7.51878	8.24808	6.01745	7.54475	7.52529	4.59397	2.84886	4.58493	5.0287	2.99073	3.52127	5.44122	3.38077	4.99125	3.67979	5.84702	6.37305	3.19823	3.78636	4.85293	5.00063	5.90459	4.09729	2.07587	6.14585	4.22546	4.34571	2.34166
ENSMUSG00000018604	Tbx3	Tbx3	21386	3.41442	7.9966	42.7429	2.8908e-08	3.09572e-05	up	8cWT-8cKO:8cWT-2cWT	NA	Tbx3	7.31238	7.69086	7.36547	6.16526	8.75563	6.16622	9.37584	9.99038	9.10318	9.1821	9.10275	9.53852	9.67265	10.0476	5.96781	7.03845	6.92938	7.07514	6.8463	7.81533	6.1465	5.80494	6.55773	7.42923	7.61126	4.52313	5.36351	7.46297	7.48079	7.01271	7.25286	2.82886	1.98924	5.7776	6.15997	3.81428	7.02968
ENSMUSG00000020325	Fstl3	Fstl3	83554	3.74912	5.02536	9.9047	0.00263198	0.0486608	up	8cWT-8cKO:8cWT-2cWT	NA	Fstl3	3.66316	3.39797	-0.304395	-1.81399	1.35488	-1.81399	6.35065	7.12146	5.99452	6.91695	8.22943	4.71552	6.14842	7.57422	2.18197	4.61494	4.02588	-1.21483	-1.40834	-1.81399	-1.0235	3.96214	3.9204	2.84018	-1.20569	-1.26118	3.11225	3.91663	-1.81399	-0.487658	1.90842	2.32623	-0.366145	5.29736	4.61739	-1.81399	-1.81399
ENSMUSG00000045039	Megf8	Megf8	269878	4.44047	3.89839	10.4544	0.00180848	0.0414934	up	8cWT-8cKO:8cWT-2cWT	NA	Megf8	-1.21727	-1.81399	-1.12177	-1.81399	-1.81399	-1.81399	5.43057	2.10527	5.50303	4.89988	7.78273	4.42625	5.8728	5.12444	3.43815	3.19184	-1.81399	-0.466615	3.83999	-0.3409	-1.81399	-1.81399	2.51358	3.67979	-1.20569	-1.81399	-1.81399	3.65676	-1.81399	1.80745	-0.232999	-0.987281	3.81198	-1.01655	0.819457	-1.81399	0.566096
ENSMUSG00000028367	Txn1	Txn1	22166	5.1865	2.6189	9.86241	0.00239996	0.0471414	up	8cWT-8cKO:8cWT-2cWT	NA	Txn1	-0.796383	-1.1692	-1.12177	1.79137	0.0596176	-1.81399	2.59374	4.8481	2.92292	0.507634	3.16948	-1.00997	6.2207	4.62319	-1.46129	-1.81399	2.74965	1.97998	2.18018	1.76531	1.10572	2.144	-1.81399	1.80468	-0.182729	3.76174	-1.81399	3.95021	0.691803	-0.10847	-0.232999	-1.81399	-1.81399	-1.81399	-1.15558	1.11364	0.566096
ENSMUSG00000025467	Prap1	Prap1	22264	5.19874	-1.23301	9.7947	0.00263096	0.0486608	up	8cWT-8cKO:8cWT-2cWT	NA	Prap1	-1.81399	-1.81399	-1.81399	-1.81399	-1.81399	-1.81399	-1.81399	-1.81399	-1.81399	-1.81399	-1.81399	0.537292	2.07362	-1.81399	-0.941477	-1.81399	-1.81399	-1.81399	-1.81399	-1.81399	-1.81399	-1.81399	-1.81399	-1.81399	-1.81399	-1.81399	-1.81399	-1.81399	-1.81399	-1.81399	-1.81399	-1.81399	-1.81399	-1.81399	-1.81399	-1.81399	-1.81399
ENSMUSG00000031665	Sall1	Sall1	58198	5.50267	3.61048	11.1281	0.0013153	0.0356797	up	8cWT-8cKO:8cWT-2cWT	NA	Sall1	-1.81399	-1.81399	-1.81399	-1.81399	0.0596176	-1.81399	5.23169	5.56494	7.14585	-0.229281	5.6741	5.74241	3.21037	5.75975	-1.81399	-1.03526	-1.06013	-0.200781	-1.81399	-1.81399	-1.0235	1.57165	4.81044	-1.81399	-1.81399	-1.81399	-1.81399	2.76638	-1.81399	-1.81399	-0.647373	2.89437	-0.366145	-1.81399	-1.81399	-1.81399	-1.81399
ENSMUSG00000051726	Kcnf1	Kcnf1	382571	5.57956	3.23031	10.5351	0.00178523	0.0413572	up	8cWT-8cKO:8cWT-2cWT	NA	Kcnf1	-1.81399	-1.81399	-1.81399	-1.81399	-1.81399	-1.81399	6.21084	4.41168	4.93761	6.9505	3.43295	-1.81399	4.87979	5.20028	-1.46129	-1.81399	-1.06013	-1.81399	2.26578	-1.81399	-1.81399	-1.81399	-1.81399	1.08283	-1.81399	-1.81399	-1.81399	-1.81399	-1.81399	2.19288	-1.81399	-1.81399	-1.81399	0.626453	-1.81399	-1.81399	0.566096
ENSMUSG00000034538	Zfp418	Zfp418	232854	5.87952	-0.846207	10.9153	0.001561	0.0387823	up	8cWT-8cKO:8cWT-2cWT	NA	Zfp418	-1.81399	-1.81399	-1.81399	-1.81399	-1.81399	-1.81399	-1.81399	1.06981	-1.81399	-1.81399	-1.81399	2.638	-0.824285	-1.31443	-1.1781	-1.81399	-0.372641	-1.81399	-0.832828	-1.81399	-1.81399	-1.81399	-1.81399	-1.47068	-1.20569	-1.81399	-1.26137	-1.81399	-1.81399	-1.81399	-1.81399	-1.81399	-1.81399	-1.81399	-1.81399	-1.81399	-1.81399
ENSMUSG00000024395	Lims2	Lims2	225341	5.89479	-0.841939	10.0413	0.00234306	0.0469178	up	8cWT-8cKO:8cWT-2cWT	NA	Lims2	-1.81399	-1.81399	-1.81399	-1.81399	-1.81399	-1.81399	-1.81399	-1.81399	3.00125	-1.81399	-1.81399	-1.81399	-0.824285	-0.944065	-1.46129	-1.81399	-1.81399	-1.81399	-1.81399	-1.81399	-1.81399	-1.81399	-1.81399	-0.961208	-1.81399	0.279765	-1.81399	-1.81399	-1.81399	-1.81399	-1.81399	-1.81399	-1.81399	-1.81399	-1.81399	-1.81399	-1.81399
ENSMUSG00000039194	Rlbp1	Rlbp1	19771	6.13883	-0.724918	9.7372	0.00270324	0.0492119	up	8cWT-8cKO:8cWT-2cWT	NA	Rlbp1	-1.81399	-1.81399	-1.81399	-1.81399	-1.81399	-1.81399	-1.81399	2.91522	-1.81399	-1.81399	-1.81399	1.50093	-1.81399	-1.81399	-1.81399	-1.81399	-1.81399	-1.81399	-1.81399	-1.81399	-1.81399	-1.81399	-1.81399	-1.81399	-1.81399	-1.81399	-1.81399	0.771344	-1.81399	-1.81399	-1.81399	-1.81399	-1.81399	-1.81399	-1.81399	-1.81399	-1.81399
ENSMUSG00000026831	1700007K13Rik	1700007K13Rik	69327	6.58173	0.809378	9.76885	0.00251044	0.0479895	up	8cWT-8cKO:8cWT-2cWT	NA	1700007K13Rik	-1.81399	-0.930165	-1.81399	-1.81399	-1.81399	-1.81399	-1.81399	-1.81399	-1.81399	5.44302	3.58516	-0.496733	0.753772	-1.81399	-1.46129	-1.81399	-1.81399	-1.81399	-1.40834	-1.81399	-1.81399	-1.81399	-1.27372	-1.81399	-1.81399	-1.81399	-1.81399	-1.81399	-1.81399	-0.487658	-1.81399	-1.81399	-1.81399	-1.81399	-1.81399	-1.81399	-1.81399
ENSMUSG00000093483	AA465934	AA465934	613254	7.01168	-0.321169	10.7607	0.00167642	0.0402024	up	8cWT-8cKO:8cWT-2cWT	NA	AA465934	-1.81399	-1.81399	-1.81399	-1.81399	-1.81399	-1.81399	-1.05064	2.41678	-1.81399	3.67749	-0.17578	-1.81399	-1.81399	-1.81399	-1.81399	-1.81399	-1.81399	-1.81399	-1.81399	-1.81399	-1.81399	-1.81399	-1.81399	-1.81399	-1.20569	-1.81399	-1.81399	-1.81399	1.29108	-1.81399	-1.81399	-1.81399	-1.81399	-1.81399	-1.81399	-1.81399	-1.81399
ENSMUSG00000000958	Slc7a7	Slc7a7	20540	7.12586	0.804144	9.82605	0.00249812	0.0479895	up	8cWT-8cKO:8cWT-2cWT	NA	Slc7a7	-1.81399	-1.81399	-1.81399	-1.81399	-1.81399	-1.81399	2.59374	-0.316699	4.75749	-1.81399	-1.81399	-1.81399	4.11988	-0.405205	-1.81399	-1.81399	-1.81399	-1.81399	-1.81399	-1.81399	-1.81399	-1.81399	-1.27372	1.44861	-1.81399	-1.81399	-1.81399	-1.81399	-1.81399	-1.00349	-1.81399	-1.81399	-1.81399	-1.81399	-1.81399	-1.81399	-1.81399
ENSMUSG00000014778	Fhod1	Fhod1	234686	7.2295	0.833087	10.0276	0.00226958	0.0462874	up	8cWT-8cKO:8cWT-2cWT	NA	Fhod1	-1.81399	-1.81399	-1.81399	-1.81399	-1.81399	-1.81399	5.57563	-1.81399	2.63425	-1.81399	-0.17578	-1.81399	-1.81399	-1.81399	-1.81399	-1.81399	-1.81399	-1.81399	-1.81399	-1.81399	-1.81399	-1.81399	-1.81399	-1.81399	-1.81399	0.112631	-1.81399	-1.81399	-1.81399	-1.81399	-1.81399	-1.81399	-1.81399	-1.01655	-1.81399	-1.81399	-1.81399
ENSMUSG00000060090	Rp2	Rp2	19889	7.25462	-0.15918	12.4738	0.000769247	0.0279163	up	8cWT-8cKO:8cWT-2cWT	NA	Rp2	-1.81399	-1.81399	-1.81399	-1.81399	-1.81399	-1.81399	-1.81399	3.37784	-1.81399	-0.229281	-1.81399	3.47304	-1.81399	-1.81399	-1.81399	-1.81399	-1.81399	-1.81399	-1.81399	-1.81399	-1.81399	-1.81399	-1.81399	-1.47068	-1.81399	-1.81399	-1.81399	-1.81399	-1.14955	-1.81399	-1.81399	-1.81399	-1.81399	-1.81399	-1.81399	-1.81399	-1.81399
ENSMUSG00000060923	Acyp2	Acyp2	75572	7.26368	-0.0196683	10.3252	0.00205193	0.044314	up	8cWT-8cKO:8cWT-2cWT	NA	Acyp2	-1.81399	-1.81399	-1.81399	-1.81399	-1.81399	-1.81399	-1.81399	4.4464	-1.81399	-1.81399	-1.81399	-1.81399	-1.81399	-1.31443	-1.81399	-0.761965	-1.81399	-1.81399	-1.81399	-1.81399	-1.81399	1.75958	-1.81399	-1.81399	-1.81399	-1.81399	-1.81399	-1.31136	-1.81399	-1.81399	-1.81399	-1.81399	-1.81399	-1.81399	-1.81399	-1.81399	-1.81399
ENSMUSG00000039478	Micu3	Micu3	78506	7.2666	-0.0970562	11.6817	0.00109944	0.0329851	up	8cWT-8cKO:8cWT-2cWT	NA	Micu3	-1.81399	-1.81399	-1.81399	-1.81399	-1.81399	-1.81399	4.41344	-1.81399	-1.81399	-1.81399	-1.81399	-1.81399	-1.81399	-0.0137838	-0.258838	-1.3727	-1.81399	-0.466615	-0.832828	-1.81399	-1.81399	-1.81399	-1.81399	-1.19357	-1.81399	-1.26118	-0.550807	-1.81399	-1.81399	-1.81399	-1.81399	-1.81399	-1.81399	-1.81399	-1.81399	-1.81399	-1.81399
ENSMUSG00000038168	P3h2	P3h2	210530	7.27942	-0.0714447	10.604	0.00180257	0.0414789	up	8cWT-8cKO:8cWT-2cWT	NA	P3h2	-1.81399	-1.81399	-1.81399	-1.81399	-1.81399	-1.81399	4.42681	-1.81399	-1.81399	-1.81399	-0.17578	-1.35668	-1.81399	-1.81399	-1.46129	-1.81399	-1.81399	-1.81399	1.42507	-1.81399	-1.81399	-1.81399	-1.81399	-1.81399	-1.81399	-1.81399	-1.81399	-1.81399	-1.81399	-1.81399	-1.81399	-1.81399	-1.81399	-1.81399	-1.81399	-1.81399	-1.81399
ENSMUSG00000025504	Eps8l2	Eps8l2	98845	7.43958	1.07894	11.2837	0.00122267	0.0348577	up	8cWT-8cKO:8cWT-2cWT	NA	Eps8l2	-0.47096	-1.81399	-1.81399	-1.81399	-1.81399	-1.81399	-1.05064	2.3077	3.62576	5.26245	-1.81399	-1.81399	-1.81399	3.54837	-1.81399	-1.81399	-1.81399	-1.21483	-1.09207	-1.81399	-1.81399	-1.02569	-1.81399	0.974802	-1.81399	-1.81399	-1.81399	-1.81399	-1.81399	-1.81399	-1.81399	-1.81399	-0.915587	-1.81399	-1.81399	-1.81399	-1.81399
ENSMUSG00000023484	Prph	Prph	19132	7.44225	0.796118	9.90314	0.00240798	0.0471414	up	8cWT-8cKO:8cWT-2cWT	NA	Prph	-1.81399	-1.81399	-1.81399	-1.81399	-1.81399	-1.81399	-1.81399	-1.81399	-1.35775	-1.81399	-1.81399	-1.81399	5.62489	-1.81399	-1.81399	-1.81399	0.217527	-1.81399	-1.81399	-1.43989	-1.81399	-1.81399	1.9641	-1.81399	-1.81399	-0.862492	-1.81399	-1.31136	-1.81399	-1.81399	-1.81399	-1.34221	-1.81399	-1.81399	-1.81399	-1.81399	-1.81399
ENSMUSG00000029862	Clcn1	Clcn1	12723	7.45788	-0.0612547	11.1666	0.00139072	0.0367063	up	8cWT-8cKO:8cWT-2cWT	NA	Clcn1	-1.81399	-1.81399	-1.81399	-1.81399	-1.81399	-1.81399	-1.81399	-1.81399	-1.81399	-1.81399	4.63927	-1.81399	-0.824285	-1.81399	-1.81399	-1.81399	-1.81399	-1.81399	-1.81399	-1.81399	-1.81399	-1.81399	-1.81399	-1.81399	-1.81399	-1.81399	-1.81399	-1.81399	0.158614	-1.81399	-1.81399	-1.81399	-1.81399	-1.81399	-1.81399	-1.81399	-1.81399
ENSMUSG00000087174	5530601H04Rik	5530601H04Rik	71445	7.52708	1.30982	12.734	0.000624683	0.0252382	up	8cWT-8cKO:8cWT-2cWT	NA	5530601H04Rik	-1.21727	-1.81399	-1.81399	-1.81399	-1.81399	-1.81399	-1.81399	0.402074	3.85399	3.47104	0.245778	3.88917	5.16551	-1.31443	-1.1781	-1.3727	-0.567522	-1.21483	-1.81399	-1.43989	-1.81399	-1.81399	-1.81399	1.70677	-1.81399	-1.81399	-1.81399	-1.81399	-1.81399	-1.81399	-1.81399	-0.987281	-1.81399	-1.81399	-1.81399	-1.81399	-1.81399
ENSMUSG00000020919	Stat5b	Stat5b	20851	7.5374	0.982112	10.5125	0.0018043	0.0414789	up	8cWT-8cKO:8cWT-2cWT	NA	Stat5b	-1.81399	-1.81399	-1.81399	-1.81399	-1.81399	-1.81399	-1.81399	-1.81399	3.1462	5.77809	-1.81399	-1.81399	-1.81399	-1.81399	-1.81399	-1.81399	-1.81399	-1.81399	-0.422539	-1.81399	-1.81399	-1.81399	-1.81399	-0.0408644	-1.81399	-1.81399	-1.81399	0.667502	-1.14955	-1.81399	-1.23101	-1.81399	-1.81399	-1.81399	-1.81399	-1.81399	-1.81399
ENSMUSG00000025742	Prps2	Prps2	110639	7.58233	0.537068	10.0049	0.00249714	0.0479895	up	8cWT-8cKO:8cWT-2cWT	NA	Prps2	-1.81399	-1.81399	-1.81399	-1.81399	-1.81399	-1.81399	-1.81399	-1.81399	-1.81399	5.3853	-1.81399	-1.81399	2.48831	-1.81399	-1.81399	-1.81399	-1.81399	-1.81399	-1.81399	-1.81399	-1.81399	-1.81399	-1.81399	-1.81399	-1.81399	-1.81399	-1.81399	-1.81399	-1.81399	-1.81399	-1.49325	-1.81399	-1.81399	-1.81399	-1.81399	-1.81399	-1.81399
ENSMUSG00000002731	Prkra	Prkra	23992	7.64026	0.101162	13.0406	0.000597603	0.0248941	up	8cWT-8cKO:8cWT-2cWT	NA	Prkra	-1.81399	-1.81399	-1.81399	-1.81399	-1.81399	-1.81399	-1.81399	4.22429	-1.81399	-1.81399	1.95966	2.68635	-1.81399	-1.81399	-1.81399	-1.81399	-1.81399	-1.81399	-1.81399	-1.81399	-1.81399	-1.81399	-1.81399	-1.47068	-1.81399	-1.81399	-1.26137	-1.81399	-1.81399	-1.81399	-1.81399	-1.81399	-1.81399	-1.81399	-1.81399	-1.81399	-1.81399
ENSMUSG00000114206	Gm30551	Gm30551	102632492	7.85396	0.244804	11.5409	0.00117212	0.0341165	up	8cWT-8cKO:8cWT-2cWT	NA	Gm30551	-1.81399	-1.81399	-1.81399	-1.81399	-1.81399	-1.81399	-1.81399	-1.81399	-1.81399	-1.81399	-1.81399	-1.81399	5.04816	-1.81399	-1.81399	-1.3727	-1.38837	-1.81399	-1.81399	0.275606	-1.81399	-1.81399	-1.81399	-1.81399	-1.81399	-1.81399	-1.81399	-1.81399	-1.81399	-1.81399	-1.81399	-1.81399	-1.81399	-1.81399	-1.81399	-1.81399	-1.81399
ENSMUSG00000023039	Krt7	Krt7	110310	7.9046	0.390161	12.225	0.000860091	0.0298036	up	8cWT-8cKO:8cWT-2cWT	NA	Krt7	-1.81399	-1.81399	-1.81399	-1.81399	-1.81399	-1.81399	-1.81399	-1.81399	3.90583	-1.81399	0.245778	4.04563	-1.81399	1.19219	-1.46129	-1.81399	-1.81399	1.12951	-1.81399	0.0595224	-1.81399	-1.81399	-1.81399	-1.81399	-1.81399	-1.26118	-1.81399	-1.81399	-1.81399	-1.81399	-1.81399	-1.81399	-1.81399	-1.81399	-1.81399	-1.81399	-1.81399
ENSMUSG00000038855	Itpkb	Itpkb	320404	7.95792	0.343306	12.397	0.000796164	0.0284582	up	8cWT-8cKO:8cWT-2cWT	NA	Itpkb	-1.81399	-1.81399	-1.81399	-1.81399	-1.81399	-1.81399	-1.81399	0.879633	-0.121657	-1.81399	4.89374	1.92027	-1.81399	-1.31443	-1.81399	-1.81399	-1.81399	-1.81399	-1.81399	-1.43989	-1.81399	-1.81399	-1.81399	0.858026	-1.81399	-1.81399	-1.81399	-1.81399	-1.81399	-1.81399	-1.81399	-1.81399	-1.81399	-1.81399	-1.81399	-1.81399	-1.81399
ENSMUSG00000054196	Cthrc1	Cthrc1	68588	7.98642	2.78967	15.1919	0.000207089	0.0135513	up	8cWT-8cKO:8cWT-2cWT	NA	Cthrc1	-1.81399	-1.81399	-1.81399	-1.81399	0.0596176	-1.81399	-1.05064	2.14809	4.52537	-1.81399	7.52478	3.87881	-1.81399	3.42734	-1.46129	-1.81399	-1.81399	-1.81399	-1.40834	-1.81399	-1.81399	2.91101	0.398257	-1.81399	-1.81399	-1.81399	-1.81399	-1.81399	-1.81399	-1.81399	-0.495635	-1.81399	-1.81399	-1.01655	-1.81399	-1.81399	-1.81399
ENSMUSG00000004451	Ralb	Ralb	64143	8.13326	1.69339	13.4488	0.000468807	0.0220078	up	8cWT-8cKO:8cWT-2cWT	NA	Ralb	-1.81399	-1.81399	-1.81399	-1.81399	-1.81399	-1.81399	2.39045	0.537079	5.74989	1.8861	3.81811	-0.730648	4.37508	1.39946	-0.401644	-1.81399	-1.81399	-1.81399	-1.81399	-1.81399	-1.81399	-1.81399	-1.81399	-0.76113	-0.182729	-1.81399	-1.81399	2.83988	-1.81399	-1.81399	-1.81399	-1.81399	-1.81399	-1.01655	-1.81399	-1.81399	-1.81399
ENSMUSG00000023232	Serinc2	Serinc2	230779	8.22316	0.528926	11.1682	0.00138973	0.0367063	up	8cWT-8cKO:8cWT-2cWT	NA	Serinc2	-1.81399	-1.81399	-1.81399	-1.81399	-1.81399	-1.81399	-1.81399	-1.81399	-1.81399	5.42404	-1.81399	-1.81399	-1.81399	-1.81399	-1.81399	-1.03526	-1.81399	-1.81399	1.88793	-1.81399	-1.81399	-1.81399	-1.81399	-0.961208	-1.81399	-1.81399	-1.81399	-1.81399	-1.81399	-1.81399	-1.81399	-1.81399	-1.81399	-1.81399	-1.81399	-1.81399	-1.81399
ENSMUSG00000032579	Hemk1	Hemk1	69536	8.23491	0.540497	15.6343	0.000182926	0.0124607	up	8cWT-8cKO:8cWT-2cWT	NA	Hemk1	-0.796383	-1.45587	-1.81399	-1.81399	-1.81399	-1.81399	2.21666	2.10527	2.70617	-1.81399	4.62177	-1.00997	-1.81399	1.93162	-1.81399	-1.81399	-1.81399	-1.81399	-1.81399	-1.81399	-1.81399	-1.81399	-1.81399	-1.81399	-1.20569	-1.81399	-1.81399	-1.31136	-1.81399	-1.81399	-1.81399	-1.81399	-1.81399	-1.81399	-1.81399	-1.81399	-1.81399
ENSMUSG00000004267	Eno2	Eno2	13807	8.30679	0.595554	14.0945	0.00037611	0.0192325	up	8cWT-8cKO:8cWT-2cWT	NA	Eno2	-1.81399	-1.81399	-1.81399	-1.81399	-1.81399	-1.81399	-1.81399	3.90034	-1.81399	-1.81399	-1.81399	-0.730648	4.57498	2.73101	-1.81399	-1.81399	-1.38837	-1.81399	-1.81399	-1.81399	-1.81399	-1.02569	-1.81399	-1.81399	-1.81399	-1.81399	-1.81399	-1.81399	-1.81399	-1.81399	-1.81399	-1.81399	-1.81399	-1.81399	-1.81399	-1.81399	-1.81399
ENSMUSG00000115275	NA	ENSMUSG00000115275	NA	8.45664	1.90129	15.7642	0.00016927	0.0121594	up	8cWT-8cKO:8cWT-2cWT	NA	ENSMUSG00000115275	-1.81399	-1.81399	-1.81399	-1.81399	-1.81399	-1.81399	3.80433	4.48867	4.59016	-1.81399	5.85722	0.0383515	-1.81399	2.96643	-1.46129	-1.81399	-1.81399	-1.81399	-1.81399	-1.81399	-1.81399	-1.02569	0.398257	-1.81399	-1.81399	-1.81399	-1.81399	-0.939318	-1.81399	-1.00349	-1.81399	-1.81399	-1.81399	-1.81399	-1.81399	-1.81399	-1.81399
ENSMUSG00000096929	A330023F24Rik	A330023F24Rik	320977	8.53228	0.771769	12.6293	0.000717572	0.0269836	up	8cWT-8cKO:8cWT-2cWT	NA	A330023F24Rik	-1.81399	-1.81399	-1.81399	-1.81399	-1.81399	-1.81399	-1.81399	-1.2722	-1.81399	-1.81399	-1.81399	-1.81399	5.72004	-1.81399	-1.81399	-1.81399	-1.81399	-1.81399	-1.81399	-1.81399	-1.81399	-1.81399	-1.81399	0.0682993	-1.81399	-1.81399	-1.81399	-1.81399	-1.81399	-1.81399	-1.81399	-1.81399	-1.81399	-1.81399	-1.81399	-1.81399	-1.81399
ENSMUSG00000044220	Nkx2-3	Nkx2-3	18089	8.95196	1.11376	13.6405	0.000437699	0.0211744	up	8cWT-8cKO:8cWT-2cWT	NA	Nkx2-3	-1.21727	-1.81399	-1.81399	-1.81399	-1.81399	-1.81399	-1.81399	-1.81399	3.91597	5.80768	-1.81399	-1.81399	-1.81399	-1.81399	-1.81399	-1.81399	-1.81399	-1.81399	-1.81399	-1.81399	-1.81399	-1.81399	-1.81399	-1.81399	-1.81399	-1.81399	-1.81399	1.125	-1.81399	-1.81399	-1.81399	-1.81399	-1.81399	-1.81399	-1.81399	-1.81399	-1.81399
ENSMUSG00000035183	Slc24a5	Slc24a5	317750	9.17951	1.33902	17.5331	8.75825e-05	0.00804259	up	8cWT-8cKO:8cWT-2cWT	NA	Slc24a5	-1.81399	-1.81399	-1.81399	-1.81399	-1.81399	-1.81399	5.26927	2.06114	0.177225	-1.81399	3.35036	-1.81399	3.33585	4.30885	-1.81399	-1.81399	-1.81399	-1.21483	-1.81399	-1.81399	-1.81399	-1.81399	-1.81399	-0.961208	-1.81399	-1.81399	-1.81399	-1.81399	-1.81399	-1.81399	-1.81399	-1.81399	-1.81399	-1.81399	-1.81399	-1.81399	-1.81399
ENSMUSG00000015889	Lta4h	Lta4h	16993	9.24896	1.43092	17.3386	9.49129e-05	0.00842602	up	8cWT-8cKO:8cWT-2cWT	NA	Lta4h	-1.81399	-1.81399	-1.81399	-1.81399	-1.81399	-1.81399	-1.05064	2.96397	4.62769	-1.81399	3.78705	-1.35668	4.50545	4.20221	-1.81399	-1.81399	-1.38837	-1.81399	-1.81399	-1.81399	-1.0235	-0.144454	-0.881557	0.0682993	-1.81399	-1.81399	-1.81399	-0.643817	-1.81399	-1.81399	-1.81399	-1.81399	-1.81399	-1.81399	-1.81399	-1.81399	-1.81399
ENSMUSG00000054342	Kcnn4	Kcnn4	16534	9.49649	1.63202	18.1489	6.31133e-05	0.00635761	up	8cWT-8cKO:8cWT-2cWT	NA	Kcnn4	-1.81399	-1.81399	-1.81399	-1.81399	0.0596176	-1.81399	-1.81399	2.98774	1.91663	-1.81399	4.78789	-1.81399	4.79491	5.2049	-1.81399	-1.81399	-1.81399	-1.21483	-1.40834	-1.81399	-1.81399	-1.81399	-1.81399	-0.585449	-1.81399	-1.81399	-1.81399	-1.81399	-1.81399	-1.81399	-1.81399	-1.81399	-1.81399	-1.81399	-1.81399	-1.81399	-1.81399
ENSMUSG00000024406	Pou5f1	Pou5f1	18999	1.30426	8.30829	14.0238	0.000348213	0.0186091	up	8cWT-8cKO:8cWT-2cWT:8cKO-2cKO	2cWT-2cKO	Pou5f1	5.91433	5.99975	6.81205	6.81089	5.964	4.93403	9.47768	9.4413	9.23363	9.9401	10.053	9.44961	9.32774	9.53442	7.69653	7.98394	8.22878	7.2449	8.22047	7.47172	6.85897	7.27566	6.14875	7.68952	6.93599	7.72588	7.68863	7.18363	5.38802	9.24097	8.99724	8.37921	8.07335	8.60987	7.62149	5.94676	6.86179
ENSMUSG00000032249	Anp32a	Anp32a	11737	2.59712	5.83602	11.6633	0.001024	0.0320453	up	8cWT-8cKO:8cWT-2cWT:8cKO-2cKO	2cWT-2cKO	Anp32a	-1.81399	-1.45587	1.78101	0.109239	-1.81399	-0.803809	7.46612	7.79573	8.11001	7.55849	7.73062	6.01981	8.11956	8.08627	3.71404	4.33842	0.541531	0.217749	4.08731	4.05462	-1.81399	1.92582	2.93512	4.28829	1.70821	2.41434	-1.81399	1.47181	4.50737	5.58776	6.26488	3.86651	4.06591	5.43671	3.157	5.14439	5.22357
ENSMUSG00000030120	Mlf2	Mlf2	30853	1.10039	9.15541	14.0502	0.000344116	0.0186091	up	8cWT-8cKO:8cWT-2cWT:8cKO-2cKO	NA	Mlf2	6.68852	7.23084	8.42062	5.95968	8.52875	8.16483	9.52351	10.6837	10.3223	10.7414	10.7628	9.58927	10.4895	10.6995	7.63555	8.2404	8.67734	7.9738	8.14577	8.21705	7.05407	8.7598	7.30164	7.72955	7.65676	7.78441	7.92919	7.09635	7.63846	9.93291	9.68735	8.87696	9.17795	8.94393	9.58636	9.01443	8.94218
ENSMUSG00000036698	Ago2	Ago2	239528	1.1438	8.34256	9.55672	0.00278096	0.0494056	up	8cWT-8cKO:8cWT-2cWT:8cKO-2cKO	NA	Ago2	7.41448	7.37918	6.44827	4.68373	6.74325	8.21611	9.27644	9.60033	9.13773	9.83264	10.1173	10.1108	9.5657	9.54218	7.59557	7.04846	6.338	7.24629	7.13684	4.89079	7.44275	6.33114	5.93691	6.15207	6.00279	5.10491	7.33482	6.15079	7.08431	9.7025	8.9154	7.5786	8.84637	8.47169	7.99566	8.37102	6.1947
ENSMUSG00000029922	Mkrn1	Mkrn1	54484	1.16235	8.18053	13.3419	0.000473595	0.0220494	up	8cWT-8cKO:8cWT-2cWT:8cKO-2cKO	NA	Mkrn1	7.30442	7.90953	5.23884	7.41827	6.53503	7.48006	9.02062	9.25583	9.32808	9.91142	9.72866	9.63887	8.86839	9.03106	6.57045	7.11881	7.05222	7.52961	6.46109	6.61763	7.06305	7.422	7.57913	6.6047	8.07661	6.98386	6.46858	7.16707	6.95099	8.53012	8.85975	8.32183	8.10846	8.00671	8.54653	7.81505	6.81658
ENSMUSG00000021270	Hsp90aa1	Hsp90aa1	15519	1.2978	10.0994	20.9728	1.77995e-05	0.00287229	up	8cWT-8cKO:8cWT-2cWT:8cKO-2cKO	NA	Hsp90aa1	8.36755	8.86917	8.28544	8.84847	9.53411	9.57261	11.4379	11.1732	11.0396	12.3693	11.6735	11.3082	10.8586	11.6441	8.58448	7.73932	7.96818	8.67368	8.09746	8.78911	8.69013	5.99933	8.23627	8.35249	7.90857	7.56218	8.9311	7.86989	8.82852	10.9937	10.8977	9.4509	9.20823	9.74856	9.53323	10.0097	10.6659
ENSMUSG00000054808	Actn4	Actn4	60595	1.53359	8.21251	18.7807	4.41762e-05	0.00522463	up	8cWT-8cKO:8cWT-2cWT:8cKO-2cKO	NA	Actn4	7.62397	8.08411	5.97279	7.0018	7.37712	8.01845	8.74324	9.35768	9.78381	9.26977	9.96774	9.57268	9.43915	9.85957	7.34326	7.50483	5.95106	7.79132	6.77145	5.88385	6.64231	7.45298	5.77616	6.03926	7.35545	6.59935	7.4178	6.60184	7.12098	8.66882	9.06365	8.24283	6.94711	6.66467	8.51574	6.16401	7.26103
ENSMUSG00000036606	Plxnb2	Plxnb2	140570	1.63499	7.09074	11.6779	0.00101706	0.0320453	up	8cWT-8cKO:8cWT-2cWT:8cKO-2cKO	NA	Plxnb2	4.28658	3.12072	0.753101	4.38785	2.666	4.9743	8.70946	8.45713	8.94279	9.33601	8.98707	8.3892	8.21112	8.44503	5.70572	5.42368	2.8507	5.48057	5.52625	4.96266	5.07445	5.44978	5.62574	4.85104	4.66351	2.64625	3.74697	4.24894	4.20303	7.35257	6.51434	5.53541	7.5068	6.92852	6.93948	2.84316	8.50265
ENSMUSG00000004207	Psap	Psap	19156	1.66756	8.28439	21.2095	1.61593e-05	0.00274065	up	8cWT-8cKO:8cWT-2cWT:8cKO-2cKO	NA	Psap	7.25437	6.51403	6.86069	6.03151	7.86841	6.14873	9.50315	9.69045	9.95841	9.68796	10.0428	9.21945	9.94507	10.3852	5.90661	6.15407	5.59977	5.72779	5.11032	4.23959	7.66407	6.83039	5.28692	6.84993	6.18537	5.42334	7.41668	5.55423	5.85414	8.09269	8.82391	8.74521	8.33064	8.08909	8.34782	7.10316	6.62008
ENSMUSG00000029580	Actb	Actb	11461	2.01943	8.64176	33.7568	1.36274e-07	9.84786e-05	up	8cWT-8cKO:8cWT-2cWT:8cKO-2cKO	NA	Actb	7.48774	6.97281	5.56127	7.18619	7.91445	6.75699	9.52817	10.3432	10.2604	10.1373	10.7823	9.6702	10.0194	10.5817	7.0891	6.19071	7.02112	6.83909	7.01544	8.10769	6.90466	6.45191	6.88392	7.50158	7.52627	7.27855	6.77872	7.31831	6.0838	8.76722	9.43272	6.69315	6.89146	8.94209	6.35377	8.14701	7.19189
ensembl_id	Symbol	Uniq_syms	entrez	logFC	logCPM	F	PValue	FDR	expression	FOUR_WAY_UP_COMP	FOUR_WAY_DOWN_COMP	Uniq_syms	TZSC118	TZSC119	TZSC120	TZSC121	TZSC122	TZSC123	TZSC125	TZSC126	TZSC127	TZSC128	TZSC129	TZSC130	TZSC131	TZSC132	TZSC94	TZSC95	TZSC96	TZSC97	TZSC98	TZSC99	TZSC100	TZSC101	TZSC102	TZSC103	TZSC104	TZSC105	TZSC106	TZSC107	TZSC108	TZSC109	TZSC110	TZSC111	TZSC112	TZSC113	TZSC114	TZSC115	TZSC116
ENSMUSG00000113688	NA	ENSMUSG00000113688	NA	-7.68078	2.62714	15.5704	0.000175324	0.0123465	down	NA	2cWT-2cKO:8cWT-8cKO	ENSMUSG00000113688	-1.81399	-1.45587	-1.81399	-1.81399	-1.81399	-1.81399	-1.81399	-1.81399	-1.81399	-1.81399	-1.81399	-1.81399	-0.824285	-1.81399	4.65388	3.09207	-0.200979	1.68382	0.272402	0.976891	5.31153	1.66867	-1.81399	3.64497	-1.81399	0.429532	4.57169	4.31057	2.0394	-1.00349	-1.49325	-1.81399	-1.81399	3.37285	6.00603	-1.81399	-1.81399
ENSMUSG00000078511	Pramel16	Pramel16	329984	-6.96749	3.70932	21.0411	1.8748e-05	0.00291225	down	NA	2cWT-2cKO:8cWT-8cKO	Pramel16	-1.81399	-1.81399	-1.81399	-1.81399	-1.81399	-1.81399	-1.81399	-1.81399	-1.35775	-1.81399	-1.81399	-1.81399	-1.81399	-1.31443	4.72004	1.9434	4.61971	5.50403	5.60773	5.94822	2.6076	5.50994	3.8575	3.90988	4.27624	3.56534	4.66523	4.86241	5.493	-0.487658	-1.81399	1.75049	-1.81399	5.51164	1.87038	-1.81399	0.566096
ENSMUSG00000104338	NA	ENSMUSG00000104338	NA	-6.89967	2.76199	14.09	0.000338032	0.0186041	down	NA	2cWT-2cKO:8cWT-8cKO	ENSMUSG00000104338	-1.81399	-1.1692	-1.81399	-1.81399	-1.81399	-1.81399	-1.81399	-1.81399	-1.81399	-1.81399	-1.81399	-1.35668	-1.81399	-0.944065	4.03144	4.4833	5.37395	-1.81399	3.59742	-0.062008	5.00156	-1.02569	1.52014	3.67979	-1.81399	-1.81399	4.58771	-1.81399	3.38301	-1.81399	2.03844	-0.261079	5.69044	0.973465	3.13014	-1.81399	-1.81399
ENSMUSG00000110462	NA	ENSMUSG00000110462	NA	-6.72492	2.38031	13.1685	0.000531663	0.0235015	down	NA	2cWT-2cKO:8cWT-8cKO	ENSMUSG00000110462	-1.81399	-1.81399	-1.81399	-1.81399	-1.81399	-1.81399	-1.05064	-1.81399	-1.35775	-1.81399	-1.81399	-1.81399	-1.81399	-1.81399	2.36956	3.94926	2.31291	4.08544	1.15288	1.93373	3.78378	3.68902	3.13929	3.64497	-1.81399	4.1223	3.33736	3.43753	-1.14955	5.00063	-1.81399	4.10654	-0.915587	-1.01655	-1.81399	-1.81399	-1.81399
ENSMUSG00000046167	Gldn	Gldn	235379	-6.40197	2.43605	12.1921	0.000827819	0.0291508	down	NA	2cWT-2cKO:8cWT-8cKO	Gldn	-1.81399	-1.81399	-1.81399	-1.81399	-1.81399	-1.81399	-1.81399	-1.81399	-1.81399	-1.81399	-1.81399	-1.81399	-1.81399	-1.31443	4.73719	2.5809	3.77132	3.58471	3.35857	3.42278	2.99323	-1.81399	-1.81399	3.61829	-1.81399	4.20773	-1.81399	4.59867	4.63842	-1.81399	1.90842	1.88549	3.30271	2.97096	-1.81399	-1.81399	-1.81399
ENSMUSG00000113533	NA	ENSMUSG00000113533	NA	-6.20941	4.17146	24.9977	3.56468e-06	0.00100421	down	NA	2cWT-2cKO:8cWT-8cKO	ENSMUSG00000113533	0.67414	-0.242423	-0.655954	2.08939	1.35488	-0.803809	-1.05064	-1.81399	-0.732722	-0.229281	-1.81399	-1.35668	-0.242772	-1.81399	5.68378	6.15407	4.84707	5.27225	2.81256	3.97961	5.98099	4.38968	5.16235	5.40027	4.90529	3.74755	5.31142	2.02773	5.96587	2.05082	3.91487	4.646	4.57737	5.52485	3.50931	-1.81399	-1.81399
ENSMUSG00000096014	Sox1	Sox1	20664	-6.11601	2.42227	9.61125	0.00276829	0.0494008	down	NA	2cWT-2cKO:8cWT-8cKO	Sox1	-1.81399	-1.81399	-1.81399	-1.81399	-1.81399	-1.81399	-1.81399	-1.81399	-1.81399	-1.81399	-1.81399	-1.81399	-1.81399	-1.31443	-1.1781	-1.81399	-0.372641	-1.21483	-1.40834	-1.1431	-1.81399	3.86312	4.95566	4.02945	6.44451	3.51596	0.564726	2.49021	-1.14955	-1.81399	-1.49325	-1.81399	4.31777	-1.81399	-1.81399	-1.81399	-1.81399
ENSMUSG00000115920	NA	ENSMUSG00000115920	NA	-4.61299	3.11604	10.4682	0.00179661	0.0414789	down	NA	2cWT-2cKO:8cWT-8cKO	ENSMUSG00000115920	0.212339	-0.930165	-1.81399	-1.81399	-1.81399	-0.803809	-1.05064	-1.2722	-0.499085	-1.81399	-0.773871	-0.496733	-1.81399	-1.31443	4.63571	2.15597	3.11726	2.71818	-1.81399	3.48918	5.26557	5.18042	-0.319839	4.89616	4.17266	5.21217	1.84921	5.41687	1.55885	-1.81399	1.64002	4.95316	0.341761	2.62326	-0.523652	0.620496	1.42041
ENSMUSG00000047193	Dync2h1	Dync2h1	110350	-4.24888	6.46458	58.2174	5.48023e-11	1.82174e-07	down	NA	2cWT-2cKO:8cWT-8cKO	Dync2h1	2.80453	3.37587	-0.304395	3.29506	0.847977	0.7879	1.87042	2.98774	2.65863	0.993039	4.04512	1.99895	2.41437	2.62491	8.15851	7.11881	7.26581	7.78079	6.94799	5.71377	6.11661	7.37784	6.80111	7.44703	7.41214	6.97018	7.08411	7.00344	7.47135	7.21985	6.64869	7.792	5.93023	7.1515	6.04608	6.70437	6.72167
ENSMUSG00000022707	Gbe1	Gbe1	74185	-2.60239	5.41157	11.6477	0.00103148	0.0320453	down	NA	2cWT-2cKO:8cWT-8cKO	Gbe1	2.61168	2.04639	0.417012	3.29506	-1.81399	1.52621	3.50996	4.30219	1.9565	-1.81399	2.58323	-0.730648	-0.242772	4.26537	6.47404	5.99052	5.88112	7.12442	6.45654	4.54552	5.33397	7.15107	5.43213	6.82584	6.48591	4.6353	5.66846	6.0434	6.44226	5.50845	5.53102	6.24532	6.69675	4.03968	5.55198	4.79963	2.34166
ENSMUSG00000082454	Gm12183	Gm12183	432554	-2.35057	6.19269	16.7533	0.000104774	0.00902305	down	NA	2cWT-2cKO:8cWT-8cKO	Gm12183	3.38997	5.03993	4.68244	1.79137	5.51575	3.6977	4.28722	3.74164	4.47821	2.70921	3.96412	2.42655	5.64928	3.72567	6.04556	6.99307	7.00696	5.5408	7.61574	7.86307	6.89463	3.43694	6.56759	7.68471	6.29083	6.39142	6.90713	6.48261	6.53577	6.99826	7.19965	5.45085	4.46949	7.24229	7.3167	4.9534	5.72556
ENSMUSG00000061859	Patj	Patj	12695	-1.90175	7.26322	27.4405	1.39125e-06	0.000502695	down	NA	2cWT-2cKO:8cWT-8cKO	Patj	6.96071	6.61655	6.60961	5.4321	5.16593	5.64081	6.33301	6.24272	5.6712	4.84384	5.6484	5.55656	5.70461	5.78152	7.5202	7.6904	7.8902	7.22809	7.31306	7.41307	8.22553	7.64554	7.27662	7.59005	8.13672	8.17023	7.53809	8.03286	7.49815	8.36075	7.31641	7.92202	7.047	6.51709	7.61726	8.04804	7.8224
ENSMUSG00000027014	Cwc22	Cwc22	80744	-1.76908	7.51041	19.6876	3.02386e-05	0.00400651	down	NA	2cWT-2cKO:8cWT-8cKO	Cwc22	5.83922	6.03368	6.2097	6.35918	3.22925	4.63233	6.16372	6.22032	5.09771	5.4048	5.00591	5.517	5.96634	5.90566	8.27241	8.66067	8.18639	7.72497	8.68306	8.45404	8.2747	6.28979	8.97874	7.44893	8.78332	8.28401	7.77772	8.03677	8.19024	7.4845	7.30353	6.9119	7.93534	8.23392	8.09881	4.34571	7.11928
ENSMUSG00000064368	ND6	ND6	17722	-1.56989	9.96958	38.976	2.22342e-08	2.84273e-05	down	NA	2cWT-2cKO:8cWT-8cKO	ND6	8.69773	9.133	8.83	9.34603	9.25338	9.4554	8.60456	8.50579	9.74894	8.46756	8.39309	9.60507	7.88304	9.0108	10.1722	10.2424	9.51423	10.5182	10.2709	9.84507	10.5401	10.5392	10.0815	10.0278	9.60251	11.2613	10.2072	10.3419	9.89665	10.1739	9.99082	10.935	10.3602	10.8068	10.6759	10.1976	10.3815
ENSMUSG00000104243	NA	ENSMUSG00000104243	NA	-6.62964	3.31329	14.4837	0.000301656	0.0172296	down	NA	2cWT-2cKO:8cWT-8cKO:8cKO-2cKO	ENSMUSG00000104243	-1.81399	-1.81399	-1.81399	-1.81399	0.0596176	-1.81399	-1.81399	-1.81399	-1.81399	-1.81399	-1.81399	-1.81399	-1.81399	-1.81399	4.18926	4.17735	0.63516	1.31074	4.83028	4.33295	5.21004	-1.81399	4.94964	5.17165	-0.450327	6.47564	5.18024	4.09734	3.23792	-1.81399	-1.81399	-1.81399	-1.81399	0.626453	3.62922	-1.81399	-1.81399
ENSMUSG00000085973	NA	ENSMUSG00000085973	NA	-5.61526	2.61617	11.0332	0.00147859	0.0376926	down	NA	2cWT-2cKO:8cWT-8cKO:8cKO-2cKO	ENSMUSG00000085973	-1.81399	-1.81399	-1.81399	-1.81399	-1.81399	-1.81399	-1.81399	-1.81399	-1.81399	-1.81399	-1.81399	-1.81399	-1.81399	-1.81399	2.0233	3.38691	5.2756	2.22558	4.59147	5.65713	-1.0235	3.09682	4.30684	3.57269	0.56332	3.1988	-1.26137	4.31057	3.01853	1.14659	2.26786	-1.81399	-1.81399	-1.81399	-1.81399	-1.81399	-1.81399
ENSMUSG00000037902	Sirpa	Sirpa	19261	-4.69953	3.29431	10.4434	0.00181796	0.0416003	down	NA	2cWT-2cKO:8cWT-8cKO:8cKO-2cKO	Sirpa	-1.81399	-0.386104	-1.81399	0.109239	-1.81399	-0.803809	-1.81399	-1.81399	-1.81399	-1.81399	-1.81399	-1.35668	-1.81399	-1.81399	3.73126	4.24859	5.15433	3.84204	6.10437	4.52456	1.93062	2.07488	4.90056	4.41771	3.88291	5.06541	3.65875	3.10132	5.43315	-1.81399	2.28892	-1.81399	-1.81399	-0.505962	-1.81399	-1.81399	1.42041
ENSMUSG00000083258	Gm5939	Gm5939	546337	-4.05204	5.21894	16.3963	0.000122278	0.0100117	down	NA	2cWT-2cKO:8cWT-8cKO:8cKO-2cKO	Gm5939	0.536005	1.70012	-0.655954	1.41531	3.71883	-0.215469	0.108105	-0.570722	-0.499085	-1.81399	1.4265	1.44581	-0.242772	-1.31443	6.83515	6.71422	6.98601	4.69531	8.32595	6.935	5.20193	3.32232	6.57738	4.55535	4.69708	6.82396	1.79505	4.68097	6.0838	-1.00349	-0.358349	3.63061	-0.915587	3.34332	2.92673	-0.13463	6.58456
ENSMUSG00000094374	Gm5435	Gm5435	432675	-2.56345	7.07592	22.5402	1.06622e-05	0.0019912	down	NA	2cWT-2cKO:8cWT-8cKO:8cKO-2cKO	Gm5435	6.53605	3.74696	5.93199	1.41531	3.44538	6.05796	2.08795	5.34793	3.49651	4.69343	2.84691	5.01433	3.5234	0.293787	8.52618	7.73243	7.51013	7.47247	7.82937	8.90056	8.73999	4.93923	7.94177	8.16166	7.50273	6.63641	8.11818	7.69689	8.72171	5.8833	5.93496	5.55917	5.976	7.88773	6.81328	6.90624	6.39252
ENSMUSG00000079029	Gm5662	Gm5662	435337	-8.18989	5.81741	59.6516	4.86054e-11	1.82174e-07	down	NA	2cWT-2cKO:8cWT-8cKO:8cWT-2cWT	Gm5662	-1.21727	-0.111763	-0.0219397	5.03777	0.0596176	3.33501	-0.554045	-0.570722	-1.35775	-1.81399	0.571603	-1.00997	-1.81399	-1.81399	6.93232	6.79709	6.43068	5.4519	7.31974	8.08192	4.81208	0.792283	7.37646	6.91805	3.13527	6.96405	5.34007	5.48337	4.27918	4.45534	6.2475	5.71232	3.83701	7.59847	3.81771	7.06991	7.48945
ENSMUSG00000094635	NA	ENSMUSG00000094635	NA	-5.08281	4.85435	27.1375	1.56135e-06	0.000529617	down	NA	2cWT-2cKO:8cWT-8cKO:8cWT-2cWT	ENSMUSG00000094635	2.97462	4.1822	2.37516	2.33626	-1.81399	-0.215469	0.108105	-1.2722	-0.499085	0.507634	-1.81399	-1.35668	-0.242772	1.1159	5.95687	5.88765	5.2756	5.69962	6.67827	5.39956	5.57284	4.66129	5.47885	5.26348	5.66814	5.09934	6.32069	6.13385	6.67381	0.191513	2.76526	4.4638	4.50114	6.13727	5.38882	2.71136	1.42041
ENSMUSG00000108473	NA	ENSMUSG00000108473	NA	-3.4427	6.69524	33.4905	1.49855e-07	0.000103781	down	NA	2cWT-2cKO:8cWT-8cKO:8cWT-2cWT	ENSMUSG00000108473	4.8931	4.4803	5.77936	6.03151	4.97056	5.5281	3.71998	3.07909	-0.732722	1.3556	4.26396	-1.81399	3.33585	3.26021	7.68553	7.79723	7.4397	6.90403	8.052	8.08595	7.46833	7.45298	8.14638	7.668	7.44709	7.20124	6.17722	7.73672	7.10886	6.29135	4.91142	4.94288	5.52322	6.91604	4.67426	5.42245	8.2427
ENSMUSG00000093862	Gm5117	Gm5117	330731	-4.75939	7.089	58.1295	7.25764e-11	2.01049e-07	down	NA	2cWT-2cKO:8cWT-8cKO:8cWT-2cWT:8cKO-2cKO	Gm5117	4.33945	5.66355	6.33078	3.29506	3.22925	5.98757	-0.554045	-1.2722	0.635855	-1.81399	-0.17578	-1.81399	-0.242772	-0.0137838	9.37718	7.69111	7.93921	6.97459	8.5031	9.24647	7.54568	5.28358	8.9594	8.76375	7.63743	7.54279	7.67464	8.59779	8.39447	0.836027	3.2026	3.72964	3.22901	5.49159	4.23809	3.17878	1.95335
ENSMUSG00000070902	Zfp352	Zfp352	236537	-4.01928	7.04474	48.2252	1.09786e-09	2.0275e-06	down	NA	2cWT-2cKO:8cWT-8cKO:8cWT-2cWT:8cKO-2cKO	Zfp352	3.94828	4.51105	5.51229	1.41531	5.51575	5.13687	-0.554045	-0.879239	-0.499085	1.6451	0.571603	-0.295506	0.170539	-0.0137838	8.49156	8.39799	8.24093	7.58896	8.7113	9.14478	7.28661	6.43477	8.84934	9.02578	7.5846	8.76642	7.03822	7.77157	7.79255	-0.10847	3.86666	2.15861	3.47201	2.93181	4.14055	5.35779	2.89938
ENSMUSG00000108963	NA	ENSMUSG00000108963	NA	-3.92419	5.87064	18.1794	6.26998e-05	0.00635761	down	NA	2cWT-2cKO:8cWT-8cKO:8cWT-2cWT:8cKO-2cKO	ENSMUSG00000108963	4.09078	4.21991	2.32562	0.905285	1.35488	-0.803809	-1.81399	-0.879239	-1.35775	-0.229281	0.245778	-0.730648	-0.824285	-0.944065	8.11818	6.22644	7.43726	7.44364	7.347	8.53551	1.47229	6.41743	7.273	7.80148	5.2988	4.4373	5.52195	7.08506	7.02657	0.191513	3.22462	-0.702657	-0.915587	4.65888	-0.912872	-1.81399	0.566096
ENSMUSG00000036585	Fgf1	Fgf1	14164	-3.56998	5.68304	17.3757	8.01757e-05	0.00748652	down	NA	2cWT-2cKO:8cWT-8cKO:8cWT-2cWT:8cKO-2cKO	Fgf1	-0.2056	3.72089	5.14199	0.109239	2.27236	4.41548	-1.81399	2.75823	3.21356	1.3556	-0.17578	-0.496733	-0.242772	-1.81399	5.90282	-1.03526	6.21829	5.88618	7.14534	7.22128	6.77671	7.05114	7.06464	7.57221	6.38653	7.00937	6.7218	7.14065	5.74201	-0.10847	3.95494	6.41115	4.94271	4.89091	5.08411	3.36575	4.97192
ENSMUSG00000103560	NA	ENSMUSG00000103560	NA	-3.4089	6.2752	31.766	2.78891e-07	0.000165551	down	NA	2cWT-2cKO:8cWT-8cKO:8cWT-2cWT:8cKO-2cKO	ENSMUSG00000103560	4.11525	5.07465	4.0506	6.57886	4.74453	5.43498	2.01902	1.15626	1.83343	-0.229281	1.71757	1.96014	0.170539	-1.31443	7.21681	7.39048	7.67903	6.06088	7.64466	7.54964	7.58675	6.84603	7.37982	7.30856	7.72548	7.98678	6.55054	6.91975	7.03209	4.17622	2.01336	4.80774	2.84091	3.40179	2.40629	5.26682	6.35085
ENSMUSG00000045780	Olfr624	Olfr624	258189	-3.28557	6.92086	35.6223	7.05433e-08	5.8625e-05	down	NA	2cWT-2cKO:8cWT-8cKO:8cWT-2cWT:8cKO-2cKO	Olfr624	5.58274	4.1822	4.66263	6.57886	5.65244	4.87853	1.70473	3.7134	0.534132	3.47104	0.571603	-1.00997	1.48935	2.78127	7.74076	8.16977	8.31531	7.7079	7.73435	8.23409	7.66259	8.15801	7.41846	7.82306	7.93255	8.99651	7.62796	7.87427	7.5008	4.06973	3.37004	4.47098	5.7963	4.64684	3.85099	5.63743	7.51798
ENSMUSG00000090637	Gm6189	Gm6189	620899	-3.25859	6.68712	15.661	0.000271751	0.0160739	down	NA	2cWT-2cKO:8cWT-8cKO:8cWT-2cWT:8cKO-2cKO	Gm6189	4.07839	5.91224	4.4479	4.33205	2.82873	4.41548	-0.554045	-0.879239	-1.01165	4.45242	0.83723	-1.00997	-1.81399	-0.944065	8.10957	7.95109	7.84008	5.41276	8.2804	8.55792	7.56952	6.81192	7.87267	8.26346	8.35683	8.5555	7.36302	7.0622	6.70405	1.14659	2.2248	5.01337	2.1576	5.63863	5.14573	4.15594	5.82022
ENSMUSG00000104498	NA	ENSMUSG00000104498	NA	-2.98886	6.1721	23.3273	6.8851e-06	0.00154645	down	NA	2cWT-2cKO:8cWT-8cKO:8cWT-2cWT:8cKO-2cKO	ENSMUSG00000104498	4.02775	4.69189	3.33506	5.53454	5.25451	5.34571	0.108105	-0.570722	2.273	0.507634	0.83723	-0.295506	3.83818	0.54717	7.49648	7.37021	7.35107	7.03705	7.2962	7.69271	6.66903	7.41852	6.63665	6.64821	7.6255	7.72407	6.90394	7.20349	6.84433	3.66891	2.78021	3.84458	2.1576	4.30776	3.99932	6.34168	5.3131
ENSMUSG00000113226	NA	ENSMUSG00000113226	NA	-2.62018	6.4373	22.4341	9.84122e-06	0.00188012	down	NA	2cWT-2cKO:8cWT-8cKO:8cWT-2cWT:8cKO-2cKO	ENSMUSG00000113226	4.09078	5.69066	5.6343	3.04036	5.56277	4.9743	4.18079	1.86974	0.534132	1.3556	2.067	2.07356	2.86658	1.33362	6.53902	7.75163	7.57433	7.34184	7.90357	8.06887	7.59761	5.61105	8.16403	7.63234	7.48482	7.61298	5.53853	7.61464	7.5008	4.06973	3.12276	3.91991	4.43712	6.78762	4.22546	4.86312	5.3131
ENSMUSG00000083557	NA	ENSMUSG00000083557	NA	-6.98204	2.14478	14.5876	0.000270663	0.0160668	down	2cWT-2cKO:8cKO-2cKO	8cWT-8cKO	ENSMUSG00000083557	2.54121	-1.45587	2.16589	-1.81399	-1.81399	-0.803809	-1.81399	-1.81399	-1.35775	-1.81399	-1.81399	-0.730648	-0.242772	-1.81399	-1.46129	-1.3727	-1.81399	-1.81399	-1.81399	-1.81399	-1.81399	-1.81399	-1.81399	-1.81399	-1.81399	-1.81399	-1.81399	-1.81399	-1.81399	4.08804	0.503171	2.47638	6.0149	0.973465	1.06606	5.72548	-1.81399
ENSMUSG00000089689	Gm4982	Gm4982	245290	-9.69236	3.27949	24.7749	3.889e-06	0.00102602	down	8cKO-2cKO	8cWT-8cKO	Gm4982	1.46529	-1.81399	-1.81399	0.905285	-1.81399	-1.81399	-1.05064	-1.81399	-1.81399	-1.81399	-1.81399	-1.81399	-1.81399	-1.81399	-1.81399	-0.532292	-1.06013	3.22688	1.09169	-1.1431	5.48867	2.00227	-1.81399	3.08066	1.64081	1.00776	-1.81399	-0.398674	-1.81399	3.61944	6.26621	5.6088	0.597438	4.82833	3.80928	4.9534	5.96537
ENSMUSG00000037860	Aim2	Aim2	383619	-9.48673	1.58903	19.2086	4.42247e-05	0.00522463	down	8cKO-2cKO	8cWT-8cKO	Aim2	-1.81399	-1.81399	-1.81399	-1.81399	-1.81399	-1.81399	-1.81399	-1.81399	-1.81399	-1.81399	-1.81399	-1.81399	-1.81399	-1.81399	-1.46129	-1.81399	-1.81399	-1.81399	-1.81399	-1.43989	-1.81399	-1.81399	-1.81399	-1.81399	-1.81399	-1.81399	-1.81399	-1.81399	-1.81399	5.48792	0.0885315	-1.81399	-1.81399	2.16423	4.27533	5.06561	-1.81399
ENSMUSG00000085840	NA	ENSMUSG00000085840	NA	-9.27248	1.44441	15.5818	0.00018712	0.0124904	down	8cKO-2cKO	8cWT-8cKO	ENSMUSG00000085840	-1.81399	-1.45587	-1.81399	0.109239	-1.81399	-1.81399	-1.81399	-1.81399	-1.81399	-1.81399	-1.81399	-1.81399	-1.81399	-1.81399	-1.81399	-0.532292	-0.792902	-1.81399	-1.81399	-1.43989	-1.81399	-1.81399	-1.81399	1.60173	0.409807	-0.862492	-1.81399	2.25968	0.534996	-1.81399	2.60659	-1.81399	-1.81399	-1.81399	-1.81399	2.96392	6.24106
ENSMUSG00000112869	NA	ENSMUSG00000112869	NA	-9.25648	1.31761	13.8249	0.000423082	0.0207435	down	8cKO-2cKO	8cWT-8cKO	ENSMUSG00000112869	-1.81399	-1.81399	-1.81399	-1.81399	-1.81399	-1.81399	-1.81399	-1.81399	-1.81399	-1.81399	-1.81399	-1.81399	-1.81399	-1.81399	-1.81399	2.2204	-1.81399	-1.81399	-1.81399	-1.43989	-1.81399	-1.81399	-1.81399	-1.81399	-1.81399	-1.81399	-1.81399	-1.81399	-1.81399	-1.81399	2.15771	-1.81399	-1.81399	2.85018	-1.81399	-1.81399	6.2637
ENSMUSG00000026815	Gfi1b	Gfi1b	14582	-8.97117	1.20097	13.9786	0.000395594	0.0198646	down	8cKO-2cKO	8cWT-8cKO	Gfi1b	-1.81399	-1.81399	-1.81399	-1.81399	-1.81399	-1.81399	-1.81399	-1.81399	-1.81399	-1.81399	-1.81399	-1.81399	-1.81399	-1.81399	-1.81399	0.135544	-1.81399	-1.81399	-1.81399	-1.81399	-1.81399	-1.81399	-1.81399	-1.81399	-1.81399	1.00776	-0.0768469	-1.81399	-1.81399	4.96146	-1.81399	-0.702657	-1.81399	5.32784	-1.81399	-1.81399	-1.81399
ENSMUSG00000113140	NA	ENSMUSG00000113140	NA	-8.26606	0.612616	12.0291	0.000939416	0.0309633	down	8cKO-2cKO	8cWT-8cKO	ENSMUSG00000113140	-1.81399	-1.81399	-1.81399	-1.81399	-1.81399	-1.81399	-1.81399	-1.81399	-1.81399	-1.81399	-1.81399	-1.81399	-1.81399	-1.81399	0.100381	-1.81399	-1.81399	-1.81399	0.817103	-1.43989	-1.81399	-1.81399	-1.81399	-1.81399	-1.81399	-1.81399	-1.81399	-1.81399	-1.81399	5.45304	-1.81399	-1.81399	-1.81399	-1.81399	-1.81399	-1.81399	-1.81399
ENSMUSG00000031845	Bco1	Bco1	63857	-8.25369	0.675303	12.5963	0.00069897	0.0265848	down	8cKO-2cKO	8cWT-8cKO	Bco1	0.38323	-1.81399	-1.81399	-1.81399	-1.81399	-1.81399	-1.81399	-1.81399	-1.81399	-1.81399	-1.81399	-1.81399	-1.81399	-1.81399	-1.81399	-1.81399	-1.81399	-1.81399	-1.81399	-1.81399	-1.81399	-1.81399	-1.81399	1.18333	-1.81399	1.10003	-1.81399	-1.81399	-1.81399	-1.81399	3.75003	-1.81399	4.42067	3.18586	-1.81399	-1.81399	-1.81399
ENSMUSG00000063919	Srrm4	Srrm4	68955	-8.20954	0.572534	12.5918	0.000729711	0.0271332	down	8cKO-2cKO	8cWT-8cKO	Srrm4	-1.81399	-1.81399	-1.81399	-1.81399	-1.81399	-1.81399	-1.81399	-1.81399	-1.81399	-1.81399	-1.81399	-1.81399	-1.81399	-1.81399	-1.46129	0.935543	-1.81399	-1.81399	-1.81399	-1.43989	-1.81399	-1.81399	-1.81399	-1.81399	-1.20569	-1.81399	-1.81399	-1.81399	-1.81399	4.68912	-1.81399	-1.81399	-1.81399	-1.81399	4.05034	-1.81399	-1.81399
ENSMUSG00000112894	NA	ENSMUSG00000112894	NA	-8.20667	0.55686	15.2268	0.000218161	0.0141083	down	8cKO-2cKO	8cWT-8cKO	ENSMUSG00000112894	-1.81399	0.491849	-1.81399	-1.81399	-1.81399	-1.81399	-1.81399	-1.81399	-1.81399	-1.81399	-1.81399	-1.81399	-1.81399	-1.81399	-1.81399	-1.81399	-1.81399	-1.81399	-1.81399	-1.43989	-1.81399	-1.81399	-1.81399	-1.81399	-1.81399	-1.81399	-1.81399	-1.81399	-1.81399	4.15901	4.2516	1.96894	1.00323	-1.81399	-1.81399	-1.81399	-1.81399
ENSMUSG00000115178	NA	ENSMUSG00000115178	NA	-7.93866	0.293832	12.2898	0.000967244	0.0312	down	8cKO-2cKO	8cWT-8cKO	ENSMUSG00000115178	-1.81399	-1.81399	-1.81399	-1.81399	-1.81399	-1.81399	-1.81399	-1.81399	-1.81399	-1.81399	-1.81399	-1.81399	-1.81399	-1.81399	-1.81399	-1.81399	-1.81399	-1.81399	-1.81399	-1.81399	-1.81399	-1.81399	-1.81399	-1.81399	-1.81399	-1.81399	-1.81399	-1.81399	-1.81399	3.66891	-0.647373	2.97732	3.8616	-1.81399	-1.81399	-1.81399	-1.81399
ENSMUSG00000003198	Zfp959	Zfp959	224893	-7.88329	0.287027	12.6442	0.000831041	0.0292024	down	8cKO-2cKO	8cWT-8cKO	Zfp959	-1.81399	-1.81399	-1.81399	-1.81399	-1.81399	-1.81399	-1.81399	-1.81399	-1.81399	-1.81399	-1.81399	-1.81399	-1.81399	-1.81399	-1.81399	-1.81399	-1.81399	-1.81399	-1.81399	-1.81399	-1.81399	-1.81399	-1.81399	-1.81399	-1.81399	-1.81399	-1.81399	-1.81399	-1.81399	-1.81399	2.48413	1.84188	-0.915587	1.94583	4.39858	-1.81399	-1.81399
ENSMUSG00000085882	NA	ENSMUSG00000085882	NA	-7.68977	1.07559	12.3794	0.000735093	0.0272457	down	8cKO-2cKO	8cWT-8cKO	ENSMUSG00000085882	1.74156	-1.81399	-1.81399	-1.81399	-1.81399	-1.81399	-1.81399	-1.2722	-1.81399	-1.81399	-1.81399	-1.81399	-1.81399	-1.81399	-1.81399	-0.761965	-1.81399	-1.21483	-1.81399	-1.81399	-1.81399	-1.02569	1.70299	-1.47068	-1.81399	-1.26118	-1.81399	-1.81399	-0.696359	4.84791	1.98783	4.47098	-0.915587	-1.81399	0.249815	-1.81399	2.34166
ENSMUSG00000060568	Fam78b	Fam78b	226610	-7.64826	-0.100617	11.5676	0.00115796	0.0340323	down	8cKO-2cKO	8cWT-8cKO	Fam78b	-1.81399	-1.81399	-1.81399	-1.81399	-1.81399	-1.81399	-1.81399	-1.81399	-1.81399	-1.81399	-1.81399	-1.81399	-1.81399	-1.81399	-1.46129	-1.81399	0.72308	-1.81399	-1.81399	-1.1431	-1.81399	-1.81399	0.875521	-1.81399	-1.81399	-1.81399	-1.81399	-1.81399	-1.81399	-1.81399	-1.81399	-1.81399	-1.81399	-1.81399	-0.705176	-1.81399	4.85753
ENSMUSG00000074981	Dcdc5	Dcdc5	329482	-7.55351	0.0736969	11.8224	0.00103145	0.0320453	down	8cKO-2cKO	8cWT-8cKO	Dcdc5	-1.81399	-1.81399	-1.81399	-1.81399	-1.81399	-1.81399	-1.81399	-1.81399	-1.81399	-1.81399	-1.81399	-1.81399	-1.81399	-1.81399	-1.81399	-1.81399	-1.38837	-1.81399	-1.81399	-1.81399	-1.81399	-1.81399	-1.81399	-1.81399	-1.81399	0.112631	-1.81399	-1.81399	-1.81399	-0.487658	-1.81399	4.71409	-1.81399	-1.81399	-1.81399	-1.81399	-1.81399
ENSMUSG00000111080	Gm20300	Gm20300	100504586	-7.50008	0.025983	12.5231	0.000752437	0.027426	down	8cKO-2cKO	8cWT-8cKO	Gm20300	-1.81399	-1.81399	-1.81399	-1.81399	-1.81399	-1.81399	-1.81399	-1.81399	-1.81399	-1.81399	-1.81399	-1.81399	-1.81399	-1.81399	-1.81399	-1.81399	-1.81399	-1.81399	-1.81399	-1.43989	-1.81399	-1.81399	-1.81399	-1.81399	-1.81399	-1.81399	-1.81399	-0.643817	-1.81399	-1.81399	-1.81399	-0.465039	-1.81399	-1.81399	4.62221	-0.13463	-1.81399
ENSMUSG00000038068	Rnf144b	Rnf144b	218215	-7.20835	0.897319	10.212	0.0020299	0.0440878	down	8cKO-2cKO	8cWT-8cKO	Rnf144b	-1.81399	-1.81399	-1.81399	0.109239	-1.81399	-1.81399	-1.81399	-1.81399	-1.81399	-1.81399	-1.81399	-1.81399	-0.824285	-1.81399	-1.81399	-1.81399	-1.81399	0.541768	0.378687	-1.1431	-1.81399	-1.81399	-1.81399	-1.47068	-1.81399	-1.26118	-1.81399	-0.398674	-0.0742253	3.34288	-1.81399	-1.81399	-1.81399	-1.81399	-1.81399	5.58191	-1.81399
ENSMUSG00000035493	Tgfbi	Tgfbi	21810	-7.13645	0.984861	10.0289	0.00221567	0.0460329	down	8cKO-2cKO	8cWT-8cKO	Tgfbi	-1.81399	-1.81399	-1.81399	0.109239	-1.81399	-1.81399	-1.81399	-1.81399	-1.81399	-0.229281	-1.81399	-1.81399	-1.81399	-1.81399	-1.81399	-1.81399	-1.81399	-1.81399	-1.40834	-1.81399	-1.81399	-1.81399	-1.81399	-1.81399	-1.20569	-1.81399	-1.81399	-1.81399	-1.81399	-1.81399	-1.81399	-1.81399	-1.81399	-1.81399	-0.362437	-1.81399	6.1947
ENSMUSG00000068762	Gstm6	Gstm6	14867	-6.86794	-0.425504	11.1355	0.00141073	0.0368675	down	8cKO-2cKO	8cWT-8cKO	Gstm6	-1.81399	-1.81399	-1.81399	-1.81399	-1.81399	-1.81399	-1.81399	-1.81399	-1.81399	-1.81399	-1.81399	-1.81399	-1.81399	-1.81399	-1.81399	-1.81399	-1.81399	-1.81399	-1.81399	-0.194725	-1.81399	-1.81399	-1.81399	-1.81399	-1.81399	-1.81399	-1.81399	-1.81399	-1.81399	-1.81399	-1.81399	-1.81399	-1.81399	4.05798	-1.81399	-1.81399	-1.81399
ENSMUSG00000087373	NA	ENSMUSG00000087373	NA	-6.85238	0.776667	9.65214	0.00271461	0.0492512	down	8cKO-2cKO	8cWT-8cKO	ENSMUSG00000087373	-1.81399	-1.81399	-1.81399	-1.81399	-1.81399	-1.81399	-1.81399	-0.879239	-1.81399	-1.81399	-1.81399	-1.81399	-1.81399	-1.81399	0.767382	-1.3727	-1.81399	-1.81399	-1.81399	-1.81399	-1.81399	-1.81399	-1.81399	-1.81399	-1.81399	1.00776	-1.81399	-1.81399	-1.81399	4.70106	2.73489	-1.81399	-1.81399	3.63903	0.0350224	-1.81399	2.34166
ENSMUSG00000104916	NA	ENSMUSG00000104916	NA	-6.80729	1.62458	10.4201	0.00188461	0.0424051	down	8cKO-2cKO	8cWT-8cKO	ENSMUSG00000104916	-1.81399	-1.81399	-1.81399	-1.81399	-1.81399	-1.81399	-1.05064	-1.81399	-1.01165	-1.81399	-1.81399	-1.35668	-0.824285	-1.81399	-1.81399	-0.00470468	-1.81399	-1.21483	-1.81399	-1.81399	-1.81399	-1.81399	-1.81399	-1.81399	-1.81399	-1.81399	-1.26137	-1.81399	-1.81399	5.50845	3.31977	-1.81399	-1.81399	-1.81399	-1.81399	-1.81399	5.72556
ENSMUSG00000041120	Nbl1	Nbl1	17965	-6.77177	-0.45514	11.3573	0.00127451	0.035432	down	8cKO-2cKO	8cWT-8cKO	Nbl1	-1.81399	-1.81399	-1.81399	-1.81399	-1.81399	-1.81399	-1.81399	-1.81399	-1.81399	-1.81399	-1.81399	-1.81399	-1.81399	-1.81399	-1.81399	-1.81399	-1.81399	-1.81399	-1.40834	-1.43989	-1.81399	-1.81399	-1.81399	-1.81399	-1.81399	-1.81399	-1.81399	0.155968	-1.81399	-1.81399	-1.81399	0.952023	-1.81399	3.79986	-1.81399	-1.81399	-1.81399
ENSMUSG00000063060	Sox7	Sox7	20680	-6.71776	-0.678021	10.5195	0.00200482	0.0439026	down	8cKO-2cKO	8cWT-8cKO	Sox7	-1.81399	-1.81399	-1.81399	0.109239	-1.81399	-1.81399	-1.81399	-1.81399	-1.81399	-1.81399	-1.81399	-1.81399	-1.81399	-1.81399	-1.81399	-1.81399	-1.81399	-1.81399	-1.81399	-1.81399	-1.81399	-1.81399	-1.81399	-1.81399	-1.81399	-1.81399	-1.81399	-1.81399	-1.81399	-1.81399	-1.81399	-1.81399	-1.81399	-1.81399	-1.81399	3.93738	-1.81399
ENSMUSG00000022665	Ccdc80	Ccdc80	67896	-6.57096	0.416012	9.58488	0.00274337	0.0494008	down	8cKO-2cKO	8cWT-8cKO	Ccdc80	-1.81399	-1.45587	-1.81399	-1.81399	-1.81399	-1.81399	-1.81399	-1.81399	-1.81399	-1.81399	-0.773871	-1.81399	-1.81399	-1.81399	-1.81399	-1.81399	-1.81399	-1.81399	-1.81399	-1.1431	-1.81399	-1.81399	-1.81399	-1.47068	-1.81399	-1.81399	-1.81399	-1.81399	-1.81399	5.21565	-1.81399	-1.81399	-1.81399	0.626453	-1.81399	-1.81399	-1.81399
ENSMUSG00000117453	Gm2424	Gm2424	100039787	-6.54359	0.504968	9.92243	0.00233176	0.0468976	down	8cKO-2cKO	8cWT-8cKO	Gm2424	-1.81399	-1.81399	-1.12177	-1.81399	-1.81399	2.3751	-1.81399	-1.81399	-1.01165	-1.81399	-1.81399	-1.81399	-1.81399	-1.81399	-1.81399	-0.761965	-1.81399	-1.81399	-1.81399	-1.81399	-1.81399	-1.02569	-1.81399	-1.47068	-1.81399	-1.81399	-1.81399	-1.31136	-1.81399	-1.00349	3.50213	3.82231	0.0307989	-1.81399	-0.912872	3.36575	-1.81399
ENSMUSG00000046031	Calhm6	Calhm6	215900	-6.43415	1.49374	9.88077	0.00243378	0.0473122	down	8cKO-2cKO	8cWT-8cKO	Calhm6	-1.81399	-1.81399	-1.81399	-1.81399	-1.81399	-1.81399	-0.185311	-1.81399	-1.81399	-1.81399	-1.81399	-0.730648	-1.81399	-1.81399	0.954922	-1.81399	-1.81399	-1.81399	-1.81399	-1.81399	-1.81399	-1.02569	-1.81399	-1.81399	-1.81399	-1.81399	-1.81399	-1.31136	-1.81399	0.439729	-1.00919	1.88549	4.35289	-1.81399	4.61739	4.10433	4.85753
ENSMUSG00000028701	Lurap1	Lurap1	68075	-6.41525	-0.508661	10.8935	0.00152674	0.0384485	down	8cKO-2cKO	8cWT-8cKO	Lurap1	0.67414	-1.81399	-1.81399	-1.81399	-1.81399	-1.81399	-1.81399	-1.81399	-1.81399	-1.81399	-1.81399	-1.81399	-1.81399	-1.81399	-1.81399	-1.81399	-1.81399	0.0236083	-1.40834	-1.81399	-1.81399	-1.81399	-0.319839	-1.19357	-1.81399	-1.81399	-1.81399	-1.81399	-1.14955	-1.81399	-1.81399	3.52427	-1.81399	-1.81399	-1.81399	-0.13463	-1.81399
ENSMUSG00000090535	NA	ENSMUSG00000090535	NA	-6.37741	1.25805	9.9369	0.00236958	0.0471169	down	8cKO-2cKO	8cWT-8cKO	ENSMUSG00000090535	-1.81399	-1.81399	-1.81399	-1.81399	-1.81399	-1.81399	-1.81399	-1.81399	-1.81399	-1.81399	-1.81399	-1.81399	-1.81399	-0.0137838	-1.81399	-1.81399	-1.06013	-1.81399	-1.81399	-1.43989	-1.81399	-1.81399	-1.81399	-1.81399	-1.81399	-1.81399	-1.81399	-1.81399	-1.81399	-1.81399	0.0885315	4.89033	4.53212	-1.01655	4.51732	-1.81399	-1.81399
ENSMUSG00000016494	Cd34	Cd34	12490	-6.3742	-0.90762	11.1677	0.00139003	0.0367063	down	8cKO-2cKO	8cWT-8cKO	Cd34	-1.81399	-1.81399	-1.81399	-1.81399	-1.81399	-1.81399	-1.81399	-1.81399	-1.81399	-1.81399	-1.81399	-1.81399	-1.81399	-1.81399	-1.81399	-1.81399	-1.81399	-1.81399	-1.81399	-1.81399	-1.81399	-1.81399	-1.81399	-1.81399	-1.81399	-1.81399	-0.294451	-0.939318	-1.81399	-1.81399	-1.81399	1.49297	-1.81399	-1.81399	-1.81399	-1.81399	3.3006
ENSMUSG00000032356	Rasgrf1	Rasgrf1	19417	-6.17085	-1.118	10.5979	0.00202814	0.0440878	down	8cKO-2cKO	8cWT-8cKO	Rasgrf1	-1.81399	-1.81399	-1.81399	-1.81399	-1.81399	-1.81399	-1.81399	-1.81399	-1.81399	-1.81399	-1.81399	-1.81399	-1.81399	-1.81399	-1.81399	-1.81399	-1.81399	-1.81399	-1.81399	-1.81399	-1.81399	-1.81399	-1.81399	-1.81399	-1.81399	-1.81399	-1.81399	-1.81399	-1.81399	-1.81399	-1.49325	0.349944	-1.81399	-1.81399	-1.81399	-1.81399	3.3006
ENSMUSG00000090291	Lrrc10b	Lrrc10b	278795	-5.98675	-0.851448	11.1118	0.00137939	0.0367063	down	8cKO-2cKO	8cWT-8cKO	Lrrc10b	-1.81399	-1.81399	-1.81399	-1.81399	0.847977	-1.81399	-1.81399	-1.81399	-1.81399	-1.81399	-1.81399	-1.81399	-1.81399	-1.81399	-1.81399	-1.81399	-1.81399	-1.81399	-1.81399	-1.81399	-1.81399	-1.81399	-1.81399	-1.81399	-1.81399	-1.81399	-1.81399	-1.31136	-1.81399	3.1818	-1.81399	-1.81399	-1.81399	-1.81399	-1.81399	-1.81399	-1.81399
ENSMUSG00000082901	Rps8-ps5	Rps8-ps5	433515	-5.90116	1.41851	9.89313	0.0023648	0.0471169	down	8cKO-2cKO	8cWT-8cKO	Rps8-ps5	-1.81399	-1.81399	-1.81399	0.109239	-1.81399	-1.81399	-0.554045	-0.879239	-0.732722	-1.81399	-1.81399	-1.81399	-1.81399	-0.944065	-1.81399	-1.3727	-1.81399	-1.81399	-1.81399	-0.897071	-1.0235	-0.518807	-1.81399	-1.81399	-1.20569	-1.81399	-1.81399	-1.81399	-1.81399	4.35311	4.48846	3.66855	2.68426	0.626453	4.39858	-1.81399	0.566096
ENSMUSG00000036478	Btg1	Btg1	12226	-3.03507	6.70829	27.5314	1.34403e-06	0.000496425	down	8cKO-2cKO	8cWT-8cKO	Btg1	5.80954	5.82927	7.03841	2.33626	5.00501	5.77605	3.95954	6.1244	1.05852	4.37546	5.47409	5.57594	3.48779	6.67021	5.00829	4.24859	5.11424	3.41686	4.48841	5.21894	5.5346	6.48559	5.65932	5.34167	6.00279	3.11282	5.81513	6.55896	5.79485	7.58135	5.93496	9.10333	8.05747	7.56688	9.663	7.2108	8.4093
ENSMUSG00000073102	Drc1	Drc1	381738	-2.71209	5.72189	13.2312	0.000497998	0.0226234	down	8cKO-2cKO	8cWT-8cKO	Drc1	4.22047	5.05043	4.63239	1.79137	0.847977	5.30418	5.38336	3.165	4.23245	-0.229281	2.50903	4.82215	3.5234	6.24481	0.954922	2.96622	0.333803	4.62856	5.30486	5.9324	5.33397	4.01845	2.51358	3.62723	6.61446	4.16565	2.55082	4.66083	5.07567	6.71001	5.88571	6.66995	7.99909	7.67455	6.73525	6.78033	8.26531
ENSMUSG00000028587	Orc1	Orc1	18392	-2.06493	6.12509	13.235	0.000497135	0.0226234	down	8cKO-2cKO	8cWT-8cKO	Orc1	6.06948	3.89417	3.33506	3.17332	1.72925	6.43505	3.82467	5.08691	5.5363	1.8861	4.72372	5.66308	5.63307	5.79382	6.65294	6.63962	5.78481	6.34437	6.48359	6.677	6.53985	4.64945	5.31996	5.61791	5.34718	5.83599	4.66523	5.97163	4.32779	7.49996	7.16945	6.89066	7.78594	6.48702	7.07236	6.9653	7.28335
ENSMUSG00000049606	Zfp644	Zfp644	52397	-1.74652	7.89568	20.4828	2.17636e-05	0.0032065	down	8cKO-2cKO	8cWT-8cKO	Zfp644	7.5829	7.60321	8.09991	5.1059	6.26342	7.77613	7.23301	7.22509	7.71467	6.64915	4.90825	7.01547	6.79475	6.79011	7.21375	8.48251	7.38516	8.38927	6.7836	6.77895	8.11541	7.14265	7.66337	8.25554	8.98534	6.93146	8.25862	7.93632	7.39925	7.90929	7.39741	8.84004	8.1577	9.14131	9.72726	7.56596	9.15389
ENSMUSG00000070697	Utp3	Utp3	65961	-1.50549	7.85685	15.3044	0.000197067	0.0130933	down	8cKO-2cKO	8cWT-8cKO	Utp3	7.91358	8.21048	7.62169	7.27025	7.02088	7.91018	7.36733	8.13868	6.94869	7.32774	7.38914	7.26171	7.07228	7.40623	7.29849	7.5704	5.85216	6.06404	6.56886	6.21669	8.68504	5.5423	6.36316	6.96557	6.76845	3.6131	8.10642	7.3955	7.92584	9.02998	8.84716	9.0558	9.32061	8.97013	8.83075	8.71438	8.29857
ENSMUSG00000040383	Aqr	Aqr	11834	-1.50349	6.6756	10.4415	0.00181959	0.0416003	down	8cKO-2cKO	8cWT-8cKO	Aqr	5.91781	6.57107	6.40719	4.72764	6.6913	5.5985	5.21637	6.67848	6.23637	5.24091	5.36263	5.91972	6.67715	6.00417	6.58709	7.2178	5.66505	6.68954	6.10049	5.80784	6.68075	6.59764	7.68617	5.64239	4.86893	7.18026	6.35385	5.92736	6.20262	6.29922	8.32758	7.74912	7.92517	8.13935	7.15044	7.44668	3.98494
ENSMUSG00000041133	Smc1a	Smc1a	24061	-1.43538	7.83349	16.1167	0.000138077	0.0107746	down	8cKO-2cKO	8cWT-8cKO	Smc1a	7.41324	6.37609	7.06507	6.60264	7.44143	5.72975	7.78434	7.08059	6.81952	6.77434	8.05134	8.60422	6.93026	7.79439	7.19991	7.65369	7.4985	6.48543	6.86699	6.67818	7.43239	4.87967	6.0453	6.55515	6.3891	7.20385	6.92458	6.83241	7.8044	8.95779	8.99123	9.64319	7.67236	8.52281	9.69413	8.88849	9.18387
ENSMUSG00000034206	Polq	Polq	77782	-1.43427	8.03381	16.1883	0.000133842	0.0105431	down	8cKO-2cKO	8cWT-8cKO	Polq	7.83751	8.00667	7.55205	6.6829	8.14048	5.80611	7.45148	7.4567	7.80548	7.90502	7.78469	7.62557	7.52513	7.90477	7.55928	7.78928	5.84238	7.65018	5.99374	6.55958	6.83818	7.15526	8.07422	7.06689	7.28407	4.62757	8.46727	7.47263	8.00365	9.39638	8.59342	8.97516	9.55733	8.78346	9.2962	8.66402	9.4087
ENSMUSG00000052253	Zfp622	Zfp622	52521	-1.41316	8.19537	17.624	7.21009e-05	0.00705917	down	8cKO-2cKO	8cWT-8cKO	Zfp622	7.72081	7.82996	7.38223	5.60686	8.23422	8.54613	6.99354	6.47279	8.11992	6.83309	7.96377	7.80804	7.50745	7.715	7.91566	8.3484	7.57507	7.07827	8.24043	8.08103	9.10492	7.77648	7.19119	8.39404	8.50811	6.69676	8.58415	7.90599	8.2647	9.14262	8.66387	8.41173	8.51054	9.37269	8.98716	8.1502	9.6339
ENSMUSG00000000827	Tpd52l2	Tpd52l2	66314	-1.3915	6.78396	9.74981	0.00253357	0.0482365	down	8cKO-2cKO	8cWT-8cKO	Tpd52l2	6.60028	5.87333	6.43373	7.17037	6.63741	4.9743	5.80279	5.99257	7.24577	4.06828	6.12281	6.73283	7.15691	6.79318	5.71007	4.70213	6.7382	4.98268	6.98842	6.25378	7.06305	5.54869	6.42303	5.37127	4.56695	5.97649	5.21674	5.32173	6.1222	7.28476	7.88612	8.00097	7.71009	7.23829	7.7494	7.63579	8.8442
ENSMUSG00000021690	Jmy	Jmy	57748	-1.35269	8.65772	13.8292	0.000380031	0.0192605	down	8cKO-2cKO	8cWT-8cKO	Jmy	7.08667	9.29452	8.10359	5.76271	7.52096	7.76278	7.50445	8.34773	8.31943	8.46059	8.0948	9.09373	7.93355	8.25137	8.34898	8.80256	7.41103	8.11916	7.49539	6.72601	8.88256	8.39799	7.79256	7.62174	8.30129	5.05392	9.22696	8.04845	8.81472	9.82588	9.74384	10.2611	9.44433	9.07996	10.4401	8.61645	8.93867
ENSMUSG00000053841	Txlna	Txlna	109658	-1.26201	7.65062	10.0341	0.00221013	0.0460329	down	8cKO-2cKO	8cWT-8cKO	Txlna	7.74452	8.12982	7.31718	6.33099	6.49922	7.63881	7.72336	7.18066	6.89968	5.98653	7.9197	7.32512	6.21527	7.70771	6.89748	6.48758	5.54353	7.78654	6.06313	5.15901	8.49897	8.11776	6.60445	6.35827	7.60021	5.99764	8.15157	6.34843	7.82889	8.79673	8.0535	8.16202	8.46311	8.43978	7.95942	9.45139	8.18457
ENSMUSG00000048000	Gigyf2	Gigyf2	227331	-1.22029	8.06881	14.2446	0.000315415	0.0178317	down	8cKO-2cKO	8cWT-8cKO	Gigyf2	7.53837	7.46151	7.59972	6.5908	7.5269	5.85005	7.39479	7.79489	6.97925	7.73445	8.57912	8.5991	6.92694	7.43104	7.02336	6.94025	7.48205	7.85292	7.93603	7.67558	8.10892	7.52601	6.98596	6.87738	8.41535	6.90932	8.29139	7.86256	7.93764	9.09307	9.12696	9.64537	8.62541	8.41781	8.85222	9.32603	8.74714
ENSMUSG00000038335	Tsr1	Tsr1	104662	-1.16524	7.72062	9.95963	0.0022905	0.0465409	down	8cKO-2cKO	8cWT-8cKO	Tsr1	7.69162	7.5369	6.58614	7.0801	7.6946	5.44457	8.10953	7.74259	8.22414	7.60137	7.89442	7.2089	6.52296	6.98364	6.99157	7.08785	7.0405	6.78073	4.54086	5.73901	7.57109	5.21296	6.94419	7.07263	7.53093	6.29223	7.72167	5.98789	7.48213	9.13823	9.03531	8.79751	8.24091	8.46742	8.2792	8.98083	9.11396
ENSMUSG00000038762	Abcf1	Abcf1	224742	-1.16265	9.30699	12.8741	0.000585932	0.0245823	down	8cKO-2cKO	8cWT-8cKO	Abcf1	9.06687	8.99707	9.04566	9.06932	8.0485	8.59215	8.68394	9.32365	9.56412	9.21423	8.79941	10.0173	9.40674	8.86985	7.51213	7.55799	7.14964	7.88276	6.35604	7.06133	9.61638	7.29098	7.62328	7.37116	8.98407	6.47779	9.20149	8.42297	9.18953	10.7037	10.4005	10.8313	10.3294	10.1678	10.3272	10.3837	10.4122
ENSMUSG00000041431	Ccnb1	Ccnb1	268697	-1.03039	7.92253	10.0176	0.00222774	0.0460329	down	8cKO-2cKO	8cWT-8cKO	Ccnb1	7.27623	7.57741	7.5235	7.32129	6.94305	7.49629	8.40121	7.91985	8.29728	7.66339	7.69131	7.97	7.3797	7.71581	7.06384	7.08352	7.06594	6.37523	7.05004	7.22939	8.41463	7.0998	6.11149	7.25256	5.30969	6.0849	7.24425	7.59708	7.54388	9.57934	8.61702	9.26245	9.10192	8.59506	8.91231	8.48135	8.63007
ENSMUSG00000040562	Gstm2	Gstm2	14863	-9.84945	2.32846	16.3666	0.000133649	0.0105431	down	NA	8cWT-8cKO	Gstm2	-1.81399	-1.45587	-1.81399	-1.81399	-1.81399	-1.81399	-1.81399	-1.81399	-1.81399	-1.81399	-1.81399	-1.81399	-1.81399	-1.81399	-1.81399	-1.81399	-1.81399	-1.81399	-1.81399	-1.81399	4.46426	-0.518807	-1.81399	-1.19357	-1.81399	3.85737	3.84352	-0.939318	-1.81399	-1.81399	-1.23101	3.99151	-1.81399	-1.81399	-1.81399	3.36575	6.73793
ENSMUSG00000018907	Alox12e	Alox12e	11685	-9.76929	2.17546	15.5947	0.000186082	0.0124712	down	NA	8cWT-8cKO	Alox12e	-1.81399	-1.81399	-1.81399	-1.81399	-1.81399	-0.803809	-1.81399	-1.81399	-1.81399	-1.81399	-1.81399	-1.81399	-1.81399	-1.81399	-1.81399	-1.81399	-1.81399	-1.21483	4.39018	-1.81399	-1.81399	-1.81399	-0.57353	0.353552	-1.81399	3.39368	-1.81399	2.29495	-1.81399	-1.81399	-1.49325	-1.81399	-1.81399	-1.81399	-1.81399	6.58705	4.85753
ENSMUSG00000020303	Stc2	Stc2	20856	-9.24822	1.87948	14.8114	0.000261364	0.0157093	down	NA	8cWT-8cKO	Stc2	-1.81399	-1.81399	-1.81399	-1.81399	-1.81399	-0.803809	-1.81399	-1.81399	-1.81399	-1.81399	-1.81399	-1.81399	-1.81399	-1.81399	1.74685	4.12783	1.8094	-1.81399	3.69323	2.41572	-1.81399	-1.02569	-1.81399	-1.19357	-1.81399	-1.26118	-1.81399	-1.81399	-1.81399	-1.00349	-1.49325	-1.81399	-1.81399	-1.81399	-1.81399	6.43865	-1.81399
ENSMUSG00000101615	NA	ENSMUSG00000101615	NA	-9.02985	1.76641	14.0122	0.000371242	0.0190445	down	NA	8cWT-8cKO	ENSMUSG00000101615	-1.81399	-1.81399	-1.81399	0.109239	0.0596176	-1.81399	-1.81399	-1.81399	-1.81399	-1.81399	-1.81399	-1.81399	-1.81399	-1.81399	-1.81399	2.50534	-1.38837	-1.81399	0.272402	-1.43989	-1.81399	4.01845	-1.27372	0.264591	2.89607	-1.81399	-1.81399	2.32939	3.47222	-1.81399	-1.81399	-1.81399	-1.81399	-1.81399	-1.81399	-1.81399	6.24106
ENSMUSG00000113365	NA	ENSMUSG00000113365	NA	-8.96129	1.66173	12.5449	0.000745137	0.0273069	down	NA	8cWT-8cKO	ENSMUSG00000113365	-1.81399	-1.81399	-1.81399	-1.81399	-1.81399	-1.81399	-1.81399	-1.81399	-1.81399	-1.81399	-1.81399	-1.81399	-1.81399	-1.81399	2.45494	-0.532292	-1.81399	-1.81399	-1.81399	-1.81399	-1.81399	-1.81399	4.2195	-1.81399	-1.81399	-1.81399	4.05416	-1.81399	-1.81399	-1.81399	-1.81399	-1.34221	-1.81399	4.33802	-1.81399	-1.81399	5.69257
ENSMUSG00000004730	Adgre1	Adgre1	13733	-8.95695	1.72386	14.6782	0.000292047	0.0167383	down	NA	8cWT-8cKO	Adgre1	-1.81399	-1.81399	-1.81399	-1.81399	-1.81399	-1.81399	-1.81399	-1.81399	-1.81399	-1.81399	-1.81399	-1.81399	-1.81399	-1.81399	-0.258838	-1.81399	3.42315	1.22297	-1.81399	1.20476	2.07972	0.152501	0.0834343	1.80468	1.41734	3.04481	-1.81399	-1.81399	3.28792	-1.81399	-1.81399	-1.34221	-1.81399	-1.81399	-1.81399	6.15135	-1.81399
ENSMUSG00000058670	4932411N23Rik	4932411N23Rik	237029	-8.94152	1.87202	14.2205	0.000356047	0.0186091	down	NA	8cWT-8cKO	4932411N23Rik	-1.81399	-1.81399	-1.81399	-1.81399	-1.81399	-1.81399	-1.81399	-1.81399	-1.81399	-1.81399	-1.81399	-1.81399	-1.81399	-1.81399	4.37049	3.20782	-1.81399	-1.81399	-1.81399	-1.81399	1.84987	-1.81399	-1.81399	4.27697	-1.20569	-1.81399	-1.81399	-1.81399	1.08024	-1.81399	2.50228	4.75581	-1.81399	4.24526	4.24436	-1.81399	-1.81399
ENSMUSG00000113481	NA	ENSMUSG00000113481	NA	-8.92407	2.64302	18.7483	4.92433e-05	0.00545612	down	NA	8cWT-8cKO	ENSMUSG00000113481	-1.21727	-1.81399	-1.81399	-1.81399	-1.81399	-0.803809	-1.81399	-1.81399	-1.81399	-1.81399	-1.81399	-1.81399	-1.81399	-1.81399	0.55177	5.17413	1.72673	-0.792753	2.47193	5.10003	2.916	-1.81399	3.52655	4.04956	4.92668	2.99761	-1.81399	-1.81399	-1.81399	0.439729	2.67217	-1.34221	-0.915587	-1.81399	0.521833	1.11364	5.90905
ENSMUSG00000114813	NA	ENSMUSG00000114813	NA	-8.80864	1.58737	13.2714	0.00051599	0.0230545	down	NA	8cWT-8cKO	ENSMUSG00000114813	-1.81399	-1.1692	-1.81399	-1.81399	-1.81399	-1.81399	-1.81399	-1.81399	-1.81399	-1.81399	-1.81399	-1.81399	-1.81399	-1.81399	-1.81399	4.46347	-1.81399	-1.81399	2.51918	-1.1431	-1.81399	-1.81399	-1.81399	2.87064	-1.20569	-1.81399	-0.0768469	-1.81399	-1.81399	-1.00349	-1.81399	-1.81399	-1.81399	-1.81399	5.98557	-1.81399	-1.81399
ENSMUSG00000047828	A730018C14Rik	A730018C14Rik	100504733	-8.74748	1.6424	13.3934	0.000511317	0.0229692	down	NA	8cWT-8cKO	A730018C14Rik	-1.81399	-1.81399	-1.81399	-1.81399	-1.81399	-1.81399	-1.81399	-1.81399	-1.81399	-1.81399	-1.81399	-1.81399	-1.81399	-1.81399	-0.258838	-1.81399	-1.81399	3.08472	1.47385	-1.81399	-1.81399	-1.02569	4.06103	-1.47068	-1.81399	-0.862492	2.48393	4.0045	-1.81399	-1.81399	-1.81399	-0.987281	-1.81399	-1.01655	-1.81399	-0.13463	5.93748
ENSMUSG00000086249	NA	ENSMUSG00000086249	NA	-8.70043	2.69354	15.8655	0.000162019	0.0117595	down	NA	8cWT-8cKO	ENSMUSG00000086249	-1.81399	-1.81399	-1.81399	-1.81399	-1.81399	-1.81399	-1.81399	-1.81399	-1.81399	-1.81399	-1.81399	-1.81399	-0.824285	-1.81399	-0.941477	-1.81399	1.84902	4.90725	3.11894	-1.1431	2.0071	-1.81399	0.0834343	-0.0408644	-0.450327	4.9211	-0.550807	0.86821	-1.81399	-1.81399	-1.81399	-1.81399	4.24485	-1.81399	0.436734	7.04959	-1.81399
ENSMUSG00000023367	Tmem176a	Tmem176a	66058	-8.67883	2.16397	12.5672	0.000674307	0.0258802	down	NA	8cWT-8cKO	Tmem176a	-1.81399	-1.81399	-1.81399	1.79137	-1.81399	-1.81399	-1.81399	-1.81399	-1.81399	-1.81399	-1.81399	-1.81399	-1.81399	-1.31443	-1.81399	-1.81399	-1.81399	-1.81399	-0.422539	-1.81399	-1.81399	-1.81399	4.31623	-1.81399	-1.81399	3.98385	1.34543	-1.81399	-1.81399	-1.81399	-1.23101	-1.81399	-1.81399	-1.01655	-1.81399	6.88345	-1.81399
ENSMUSG00000035126	Wdr78	Wdr78	242584	-8.62651	1.40426	11.5941	0.00110391	0.0330001	down	NA	8cWT-8cKO	Wdr78	-1.81399	-1.81399	-1.81399	-1.81399	-1.81399	1.37398	-1.81399	-1.81399	-1.81399	-1.81399	-1.81399	-1.81399	-1.81399	-1.81399	-1.81399	-1.81399	-1.81399	-1.81399	-1.81399	1.25651	-1.81399	-1.02569	-1.81399	-1.81399	-1.81399	-1.81399	-1.81399	-1.81399	4.74071	-1.81399	-1.81399	-1.81399	-0.366145	5.79951	-1.81399	-1.81399	-1.81399
ENSMUSG00000046168	Kcnrg	Kcnrg	328424	-8.58287	1.28636	11.7016	0.00105066	0.0322997	down	NA	8cWT-8cKO	Kcnrg	-1.81399	-1.81399	-1.81399	0.905285	-1.81399	-1.81399	-1.81399	-1.81399	-1.81399	-1.81399	-1.81399	-1.81399	-1.81399	-1.81399	2.98634	-1.81399	3.05085	-1.81399	-1.81399	-1.81399	-1.81399	-1.81399	-1.81399	-1.81399	-1.81399	-1.81399	-1.81399	-1.81399	3.01853	5.76884	-1.81399	-1.81399	-1.81399	-1.81399	-1.81399	-1.81399	-1.81399
ENSMUSG00000047515	BC049715	BC049715	320135	-8.46214	1.33546	12.0196	0.000908325	0.0305613	down	NA	8cWT-8cKO	BC049715	-1.81399	-1.81399	-0.0219397	-1.81399	-1.81399	-1.81399	-1.81399	-1.81399	-1.81399	-1.81399	-1.81399	-1.81399	-1.81399	-1.81399	-1.81399	-1.81399	3.32822	-1.21483	-1.81399	-0.194725	-1.81399	-1.81399	-1.27372	-1.81399	-1.81399	4.41052	-1.81399	-1.81399	-1.81399	5.63209	-1.81399	-0.261079	-1.81399	-1.81399	-1.81399	-1.81399	-1.81399
ENSMUSG00000078161	Erich3	Erich3	209601	-8.44368	1.00933	11.4555	0.00121864	0.0348128	down	NA	8cWT-8cKO	Erich3	-1.81399	-1.81399	-1.81399	-1.81399	-1.81399	-1.81399	-1.81399	-1.81399	-1.81399	-1.81399	-1.81399	-1.81399	-1.81399	-1.81399	-1.81399	-1.03526	-1.81399	-1.21483	-1.81399	-1.81399	-1.81399	0.608847	-1.81399	-0.961208	-1.81399	4.26863	-1.81399	0.155968	-1.81399	-1.81399	-1.81399	-1.81399	-1.81399	-1.81399	-1.81399	-1.81399	5.65881
ENSMUSG00000062478	Ctrc	Ctrc	76701	-8.41729	0.900734	12.0006	0.000951589	0.0309716	down	NA	8cWT-8cKO	Ctrc	-1.81399	-1.81399	-1.81399	-1.81399	-1.81399	-1.81399	-1.81399	-1.81399	-1.81399	-1.81399	-1.81399	-1.81399	-1.81399	-1.81399	-0.738253	-1.81399	-1.38837	-1.81399	-1.81399	2.05561	-1.81399	0.152501	-1.81399	3.54463	-1.81399	-1.81399	-1.81399	-1.81399	-1.81399	-1.00349	-1.81399	2.32623	-1.81399	-1.81399	-1.81399	-1.81399	5.47704
ENSMUSG00000046532	Ar	Ar	11835	-8.38747	2.00813	12.6908	0.000637156	0.0254553	down	NA	8cWT-8cKO	Ar	-1.81399	-1.81399	-1.81399	0.109239	-1.81399	-1.81399	-1.81399	-1.81399	-1.35775	-1.81399	-1.81399	-1.81399	-1.81399	-1.81399	-1.81399	-1.81399	-1.38837	-1.81399	-1.81399	-1.81399	-0.140895	3.66571	4.90056	2.19006	-1.81399	-1.81399	-0.862777	-1.31136	-1.81399	-1.00349	-1.81399	-1.81399	-1.81399	-1.81399	-0.523652	6.53926	-1.81399
ENSMUSG00000112425	NA	ENSMUSG00000112425	NA	-8.37967	1.79165	12.7963	0.000666105	0.0257339	down	NA	8cWT-8cKO	ENSMUSG00000112425	-1.81399	-1.81399	-1.81399	-1.81399	-1.81399	-1.81399	-1.81399	-1.81399	-1.81399	-1.81399	-1.81399	-1.81399	-1.81399	-1.81399	0.100381	2.34121	-1.81399	-1.81399	4.58593	2.8286	-1.81399	-1.81399	3.44333	1.6726	-1.20569	4.37403	-1.81399	-0.00631677	-1.14955	-1.81399	-1.81399	-1.81399	-1.81399	-1.81399	-1.81399	5.58191	-1.81399
ENSMUSG00000118357	Gm36627	Gm36627	102640601	-8.30185	2.9493	15.8319	0.00015635	0.0115707	down	NA	8cWT-8cKO	Gm36627	-1.81399	-1.1692	-1.81399	-1.81399	-1.81399	-1.81399	-1.81399	-1.2722	-1.81399	-1.81399	-1.81399	-1.81399	-1.81399	-1.81399	-1.81399	-1.81399	4.18915	-1.81399	5.48817	5.64261	-1.81399	1.75958	2.72567	0.974802	3.77701	-1.81399	2.76318	4.948	3.15951	-1.00349	-1.81399	-1.34221	-1.81399	-1.81399	-1.81399	-1.81399	6.58456
ENSMUSG00000036273	Lrrk2	Lrrk2	66725	-8.30102	1.6311	13.6906	0.000428064	0.020926	down	NA	8cWT-8cKO	Lrrk2	-1.21727	-1.45587	-1.81399	-1.81399	-1.81399	-1.81399	-1.81399	-1.81399	-1.81399	-1.81399	-1.81399	-1.81399	-1.81399	-1.81399	2.95738	0.856665	3.8805	-1.81399	3.59742	-0.897071	2.14885	-1.81399	-1.27372	-1.81399	-1.81399	-1.26118	4.21748	-1.81399	-1.81399	5.31223	2.24649	-1.81399	-1.81399	-1.81399	-1.81399	-0.13463	-1.81399
ENSMUSG00000107032	Gm5301	Gm5301	384356	-8.29886	3.13559	20.1245	2.52292e-05	0.00349445	down	NA	8cWT-8cKO	Gm5301	-1.81399	-1.45587	-1.12177	0.109239	-1.81399	-1.81399	-1.05064	-1.81399	-1.81399	-1.81399	-1.81399	-1.81399	-0.824285	-1.81399	1.40456	5.46082	-1.81399	-1.81399	-0.832828	0.37261	4.53053	2.20996	-0.881557	3.34213	1.41734	-1.26118	5.15358	-0.00631677	3.67373	-1.81399	3.68797	3.85559	-0.915587	4.75172	4.79884	6.56812	1.42041
ENSMUSG00000095625	Esp24	Esp24	100126776	-8.22061	1.01723	13.429	0.000503353	0.0227343	down	NA	8cWT-8cKO	Esp24	-1.81399	-1.81399	-1.81399	-1.81399	-1.81399	-1.81399	-1.81399	-1.81399	-1.81399	-1.81399	-1.81399	-1.81399	-1.81399	-1.81399	2.2312	-1.81399	0.0910507	1.68382	1.09169	2.02609	-1.81399	-1.81399	-1.27372	-1.81399	-1.20569	-1.81399	-1.81399	2.88688	-0.696359	-1.81399	-1.49325	2.6882	4.89585	-1.81399	2.74399	-1.81399	-1.81399
ENSMUSG00000000167	Pih1d2	Pih1d2	72614	-8.20973	0.745542	11.8436	0.00102163	0.0320453	down	NA	8cWT-8cKO	Pih1d2	-1.81399	-1.81399	-1.81399	-1.81399	-1.81399	-1.81399	-1.81399	-1.81399	-1.81399	-1.81399	-1.81399	-1.81399	-1.81399	-1.81399	-1.81399	-1.3727	-1.81399	-1.81399	-0.254201	-1.1431	-1.81399	-1.81399	-1.81399	2.95835	-1.81399	-1.81399	0.564726	-1.81399	-1.81399	-1.81399	-1.81399	-1.81399	5.26197	2.02236	-1.81399	-1.81399	-1.81399
ENSMUSG00000118219	NA	ENSMUSG00000118219	NA	-8.18068	1.67106	14.1577	0.00034814	0.0186091	down	NA	8cWT-8cKO	ENSMUSG00000118219	-0.2056	-1.81399	-1.81399	-1.81399	-1.81399	-1.81399	-1.81399	-1.81399	-1.81399	-1.81399	-1.81399	-1.81399	-1.81399	-1.81399	-1.81399	0.263359	4.49413	-1.81399	-1.81399	-1.81399	-1.0235	-1.81399	-1.81399	3.19341	-1.81399	2.13789	-1.26137	4.56294	2.30525	4.36817	0.429233	2.73663	1.7986	1.94583	2.72617	-1.81399	-1.81399
ENSMUSG00000060621	Nkpd1	Nkpd1	69547	-7.97765	2.39226	11.9121	0.000912211	0.03063	down	NA	8cWT-8cKO	Nkpd1	-1.81399	0.719525	-1.81399	0.109239	-1.81399	-1.81399	-1.81399	-1.81399	-0.732722	-1.81399	-1.81399	-1.81399	-1.81399	-1.81399	-0.401644	-1.81399	-1.81399	5.12869	-1.81399	-1.81399	-1.0235	-1.02569	4.18917	-1.81399	-1.81399	0.909192	-1.81399	-1.81399	-1.81399	-1.81399	-1.81399	2.82886	-1.81399	-1.81399	-1.44755	-1.81399	7.00302
ENSMUSG00000040848	Sft2d2	Sft2d2	108735	-7.95219	1.49593	13.0909	0.000584421	0.0245823	down	NA	8cWT-8cKO	Sft2d2	-1.81399	-1.81399	-1.81399	-1.81399	-1.81399	-1.81399	-1.81399	-1.81399	-1.81399	-1.81399	-1.81399	-1.81399	-1.81399	-1.81399	-1.81399	-1.3727	2.94513	-1.21483	3.63007	1.03732	-1.81399	2.33347	3.70864	-1.47068	4.04811	-0.550463	1.09952	-1.81399	-1.81399	-1.81399	4.32988	1.17927	3.7342	-1.81399	-1.81399	-1.81399	-1.81399
ENSMUSG00000083489	NA	ENSMUSG00000083489	NA	-7.94396	2.07769	12.7167	0.000661949	0.0257339	down	NA	8cWT-8cKO	ENSMUSG00000083489	-1.81399	-1.81399	-1.81399	-1.81399	-1.81399	1.52621	-1.81399	-1.81399	-1.81399	-1.81399	-1.81399	-1.81399	-1.81399	-1.81399	-1.81399	-1.81399	-1.81399	0.0236083	-1.40834	0.171606	5.56021	-1.81399	1.3107	3.42657	-1.20569	-1.26118	3.95885	4.99702	-1.81399	1.27994	-1.81399	-1.81399	-1.81399	-1.81399	3.59035	0.620496	4.36585
ENSMUSG00000080990	Olfr118	Olfr118	404308	-7.88429	1.69491	12.9009	0.000609256	0.0249841	down	NA	8cWT-8cKO	Olfr118	-1.81399	-1.81399	-1.12177	-1.81399	0.0596176	-1.81399	-1.81399	-1.81399	-1.81399	-1.81399	-1.81399	-1.81399	-1.81399	-1.81399	-0.401644	-1.81399	2.49876	-0.466615	-1.81399	4.392	0.156363	-1.81399	4.09415	2.28358	1.77261	2.04809	-0.862777	-0.939318	4.22886	-1.81399	-1.81399	-1.81399	-1.81399	-1.81399	-1.81399	5.09235	-1.81399
ENSMUSG00000114800	NA	ENSMUSG00000114800	NA	-7.87833	0.433103	12.1948	0.000871858	0.0299404	down	NA	8cWT-8cKO	ENSMUSG00000114800	-1.81399	-1.81399	-1.81399	-1.81399	-1.81399	-1.81399	-1.81399	-1.81399	-1.81399	-1.81399	-1.81399	-1.81399	-1.81399	-1.81399	-1.81399	-1.3727	0.72308	-1.81399	-1.81399	-1.81399	-1.0235	-1.81399	-1.81399	-1.81399	-1.81399	0.429532	-1.81399	1.27387	-1.81399	-1.81399	3.69588	4.34388	-1.81399	-1.81399	-0.523652	-1.81399	-1.81399
ENSMUSG00000083855	NA	ENSMUSG00000083855	NA	-7.86007	0.558675	12.7321	0.000685413	0.026129	down	NA	8cWT-8cKO	ENSMUSG00000083855	-1.81399	-1.81399	-1.81399	-1.81399	-1.81399	-1.81399	-1.81399	-1.81399	-1.81399	-1.81399	-1.81399	-1.81399	-1.81399	-1.81399	-1.81399	-1.81399	-1.06013	-1.81399	-1.81399	-1.43989	-1.0235	-1.02569	-1.27372	-1.19357	-1.81399	-0.862492	-1.81399	-1.31136	3.28792	-1.00349	1.53818	-1.81399	-0.915587	4.5206	2.61436	-1.81399	0.566096
ENSMUSG00000029661	Col1a2	Col1a2	12843	-7.8427	2.82052	14.1797	0.000324715	0.018172	down	NA	8cWT-8cKO	Col1a2	-1.81399	-1.81399	-1.81399	-1.81399	-1.81399	-0.803809	-1.81399	-1.2722	-1.35775	-1.81399	-0.773871	-1.81399	-1.81399	-1.81399	-1.46129	-1.81399	-1.81399	5.19363	3.35857	-1.81399	-1.81399	3.71197	1.9641	2.58856	4.09923	4.08891	-1.26137	-0.398674	-1.81399	-1.81399	-1.49325	-1.81399	-1.81399	-0.505962	-1.81399	3.74856	7.1439
ENSMUSG00000009941	Nxf2	Nxf2	83454	-7.80507	1.98073	13.0483	0.000561234	0.0241041	down	NA	8cWT-8cKO	Nxf2	-1.81399	-1.81399	-1.81399	-1.81399	-1.81399	-1.81399	-1.81399	-1.81399	-1.81399	-1.81399	-0.773871	-1.81399	-1.81399	-1.81399	-1.46129	-1.3727	5.02625	-1.21483	-1.40834	3.57322	1.47229	-1.02569	-0.881557	-1.47068	-1.20569	-1.26118	-1.26137	-1.31136	-0.352013	5.12106	5.59794	0.21971	-0.366145	-1.81399	-1.81399	0.620496	-1.81399
ENSMUSG00000071104	Ccdc110	Ccdc110	212392	-7.77862	0.537463	10.9008	0.00157149	0.0388466	down	NA	8cWT-8cKO	Ccdc110	-1.81399	-1.81399	-1.81399	-1.81399	-1.81399	-1.81399	-1.81399	-1.81399	-1.81399	-1.81399	-1.81399	-1.81399	-1.81399	-1.81399	-1.81399	-1.81399	3.21147	-1.81399	-1.40834	-0.062008	-1.81399	-1.81399	-1.81399	-1.81399	-1.81399	1.10003	-1.81399	-1.81399	-1.81399	-1.81399	-1.81399	-1.81399	-1.81399	4.81764	1.73436	-1.81399	-1.81399
ENSMUSG00000074655	Gm1527	Gm1527	385263	-7.75278	2.39806	15.0535	0.000220144	0.0141083	down	NA	8cWT-8cKO	Gm1527	-1.81399	0.5718	-1.81399	-1.81399	-1.81399	-0.803809	-1.81399	-1.81399	-1.81399	-1.81399	-1.81399	-1.35668	-1.81399	-1.81399	5.29547	-0.00470468	2.72856	-1.21483	-1.81399	-1.81399	0.613069	-1.81399	3.76457	1.98257	3.18344	5.32162	2.84542	-0.00631677	0.158614	-1.81399	3.42813	0.579697	-1.81399	5.19361	3.6196	-1.81399	-1.81399
ENSMUSG00000078485	Plekhn1	Plekhn1	231002	-7.74493	1.89943	12.7694	0.000646423	0.0255199	down	NA	8cWT-8cKO	Plekhn1	-1.81399	-1.81399	-1.81399	-1.81399	-1.81399	-0.215469	-1.81399	-1.81399	-1.81399	-1.81399	-1.81399	-1.81399	-1.81399	-1.81399	0.47209	-1.81399	-1.81399	-1.81399	-1.40834	-1.81399	-1.81399	5.15553	2.37673	-1.47068	-1.81399	5.08247	4.08833	1.89608	-0.352013	-1.81399	3.7576	0.349944	1.98924	3.63903	-1.81399	-1.81399	-1.81399
ENSMUSG00000023333	Gcm1	Gcm1	14531	-7.6807	2.34632	12.3586	0.000742152	0.0272905	down	NA	8cWT-8cKO	Gcm1	-1.21727	1.83584	-1.81399	-1.81399	-1.81399	-1.81399	-1.81399	-1.81399	-0.732722	-1.81399	-1.81399	-1.81399	-1.81399	-1.81399	-1.81399	-1.81399	-1.81399	-1.81399	-1.40834	-1.43989	-1.81399	5.73944	-1.81399	3.14438	1.70821	-1.81399	-1.26137	-1.81399	-1.81399	5.09415	-0.647373	3.99151	-1.81399	4.38225	5.01607	2.5663	-1.81399
ENSMUSG00000037390	Muc3	Muc3	666339	-7.61566	0.477603	11.6426	0.00107954	0.0326831	down	NA	8cWT-8cKO	Muc3	-1.81399	-1.81399	-0.655954	-1.81399	-1.81399	-1.81399	-1.81399	-1.81399	-1.81399	-1.81399	-1.81399	-1.81399	-1.81399	-1.81399	-1.81399	-1.81399	-1.38837	-0.792753	-1.09207	0.629721	-1.81399	-1.81399	-1.81399	2.47418	-1.81399	2.51833	-1.26137	-1.81399	-1.81399	2.1236	-1.81399	-1.81399	4.57737	-1.81399	-1.81399	-1.81399	-1.81399
ENSMUSG00000027368	Dusp2	Dusp2	13537	-7.57556	1.59927	11.9341	0.00094449	0.0309633	down	NA	8cWT-8cKO	Dusp2	-1.81399	0.788078	-1.81399	-1.81399	-1.81399	-1.81399	-1.81399	-1.81399	-1.81399	-1.81399	-1.81399	-1.81399	-1.81399	-1.81399	-1.81399	-1.81399	3.97307	-1.21483	-1.81399	2.08453	-1.81399	-1.81399	2.0111	2.97246	4.76988	-0.550463	-1.81399	3.89381	-1.14955	-1.81399	0.988257	-1.34221	-1.81399	-0.505962	-1.81399	4.6636	-1.81399
ENSMUSG00000112854	Gm38403	Gm38403	216377	-7.57193	1.67267	10.3397	0.00195756	0.043383	down	NA	8cWT-8cKO	Gm38403	-1.81399	-1.81399	-1.81399	-1.81399	-1.81399	-1.81399	-1.05064	-1.2722	-1.81399	-1.81399	-1.81399	-1.81399	-1.81399	-1.81399	-1.81399	-1.81399	2.64098	-1.81399	-1.81399	-1.81399	-1.81399	-1.81399	-1.81399	3.3637	-1.20569	-0.0764337	-1.81399	-1.81399	0.158614	-1.81399	-1.81399	-1.81399	4.35289	-1.81399	-1.81399	6.189	-1.81399
ENSMUSG00000113942	Gm18632	Gm18632	100417470	-7.53602	0.94014	12.7589	0.000649475	0.0255199	down	NA	8cWT-8cKO	Gm18632	-1.81399	-1.1692	-1.12177	-1.81399	-1.81399	-1.81399	-1.81399	-1.81399	-1.81399	-1.81399	-1.81399	-1.81399	-1.81399	-1.81399	-1.81399	-1.3727	-1.38837	3.35627	-1.40834	-1.81399	-1.0235	-0.518807	1.38394	3.1568	-1.81399	3.42969	-1.81399	0.667502	-1.81399	-1.81399	-1.81399	2.53232	4.04459	-1.81399	-0.912872	1.11364	1.42041
ENSMUSG00000073226	NA	ENSMUSG00000073226	NA	-7.51418	2.44424	15.6444	0.000169724	0.0121594	down	NA	8cWT-8cKO	ENSMUSG00000073226	-1.21727	-1.81399	-1.81399	-1.81399	-1.81399	-1.81399	-1.81399	-0.316699	-1.81399	-1.81399	-1.81399	-1.81399	-1.81399	-1.81399	-1.46129	0.856665	1.44584	-0.792753	-1.09207	3.52127	-1.0235	-1.02569	-0.57353	-0.0408644	5.20856	1.84975	0.908691	0.30183	-1.81399	-1.81399	0.82486	3.34844	4.22603	5.2344	3.38988	-1.81399	5.82022
ENSMUSG00000046881	Olfr374	Olfr374	258335	-7.46185	2.20867	18.098	5.89341e-05	0.00619964	down	NA	8cWT-8cKO	Olfr374	-1.81399	-1.45587	-0.304395	0.109239	0.0596176	-0.215469	-1.05064	-1.81399	-1.81399	-1.81399	-1.81399	-1.81399	-1.81399	-1.81399	2.34741	2.62916	2.2253	5.06702	3.29213	3.17636	1.6734	1.8451	0.0834343	2.51333	3.29727	1.68077	1.55547	0.86821	1.29108	5.17342	3.44699	1.03182	-0.915587	1.11998	1.93386	2.01557	0.566096
ENSMUSG00000057234	Mettl15	Mettl15	76894	-7.46048	1.53564	11.4525	0.00116334	0.0340421	down	NA	8cWT-8cKO	Mettl15	-1.81399	-1.81399	-1.81399	-1.81399	-1.81399	-1.81399	-1.81399	-1.2722	-1.81399	-1.81399	-1.81399	-1.81399	-1.81399	-1.81399	-0.560154	-1.81399	2.2253	-1.81399	3.57524	-1.81399	-1.81399	3.40912	4.03853	-1.47068	-1.20569	-1.81399	0.112196	-1.81399	-1.81399	-1.00349	2.70387	4.98859	-1.81399	-1.81399	3.63878	-1.81399	0.566096
ENSMUSG00000034552	Zswim2	Zswim2	71861	-7.45713	1.60759	11.2877	0.00127144	0.035432	down	NA	8cWT-8cKO	Zswim2	-1.81399	-0.930165	-1.81399	-1.81399	-1.81399	-1.81399	-1.81399	-1.81399	-1.81399	-1.81399	-1.81399	-1.81399	-1.81399	-1.81399	-1.1781	3.02151	-1.06013	-1.81399	-1.81399	-1.81399	4.2762	-1.81399	2.10073	3.67116	-1.81399	5.02479	-1.81399	-1.81399	-1.81399	-1.81399	0.268916	-1.81399	-1.81399	-1.81399	4.57819	-1.81399	-1.81399
ENSMUSG00000102619	NA	ENSMUSG00000102619	NA	-7.44943	1.03657	10.8948	0.00157581	0.0388466	down	NA	8cWT-8cKO	ENSMUSG00000102619	-1.81399	-1.81399	-1.81399	-1.81399	-1.81399	-1.81399	-1.81399	-1.81399	-1.81399	-1.81399	-1.81399	-1.81399	-1.81399	-1.81399	-1.81399	3.72337	4.19685	-0.466615	0.0329955	-1.81399	2.916	-1.81399	-1.81399	-1.81399	-1.81399	-1.81399	-0.294451	-1.81399	-1.81399	2.32221	-1.81399	1.37554	4.10764	-1.81399	-1.81399	-0.13463	-1.81399
ENSMUSG00000107200	NA	ENSMUSG00000107200	NA	-7.4283	0.102069	11.0006	0.00145253	0.0373206	down	NA	8cWT-8cKO	ENSMUSG00000107200	-1.81399	-1.81399	-1.81399	0.109239	-1.81399	-1.81399	-1.81399	-1.81399	-1.81399	-1.81399	-1.81399	-1.81399	-1.81399	-1.81399	-1.81399	-1.81399	0.333803	-1.81399	1.73624	-1.81399	-1.81399	-1.81399	-1.81399	-1.81399	-1.81399	-1.81399	-1.81399	-1.81399	-1.81399	4.56394	-1.81399	0.21971	-1.81399	-1.81399	-1.81399	-1.81399	-1.81399
ENSMUSG00000091985	NA	ENSMUSG00000091985	NA	-7.42145	1.51627	9.8144	0.00245601	0.047522	down	NA	8cWT-8cKO	ENSMUSG00000091985	-1.81399	-1.45587	0.594821	-1.81399	-1.81399	-1.81399	-1.81399	-1.81399	-1.81399	-1.81399	-1.81399	-1.35668	-1.81399	-1.81399	-1.81399	-1.81399	-1.38837	-1.81399	-1.81399	4.95093	-0.51573	-1.81399	4.10502	-1.81399	-1.81399	-1.81399	-1.81399	-1.81399	-1.81399	-1.81399	-1.81399	0.952023	-1.81399	-1.81399	-1.81399	5.52415	-1.81399
ENSMUSG00000111383	Gm18914	Gm18914	100417947	-7.40764	1.31792	10.6942	0.0017288	0.0406677	down	NA	8cWT-8cKO	Gm18914	-1.81399	-1.81399	-1.81399	-1.81399	-1.81399	-1.81399	-1.81399	-1.81399	-1.81399	-1.81399	-1.81399	-1.81399	-1.81399	-1.81399	3.55877	-1.81399	-1.81399	-1.81399	-1.81399	-0.686947	4.3948	-1.81399	-1.81399	2.76108	-1.81399	3.46482	-1.81399	3.21619	-1.14955	1.80745	-1.49325	-1.81399	-1.81399	-1.81399	-1.81399	-1.81399	4.44721
ENSMUSG00000061414	Cracr2a	Cracr2a	381812	-7.4055	1.15426	10.5715	0.00182986	0.0417203	down	NA	8cWT-8cKO	Cracr2a	-1.81399	-1.81399	-1.81399	-1.81399	-1.81399	-1.81399	-1.81399	-1.81399	-1.81399	-1.81399	-1.81399	-1.81399	-1.81399	-1.81399	-1.81399	3.57112	-1.81399	-1.81399	3.25074	-1.81399	-1.81399	-1.81399	4.53299	1.48844	-1.81399	-1.81399	-1.26137	-1.81399	-1.14955	-1.81399	-1.49325	3.52427	-1.81399	-1.81399	3.66707	-1.81399	-1.81399
ENSMUSG00000107418	Gm4782	Gm4782	213320	-7.39906	2.32239	12.222	0.000816566	0.0288156	down	NA	8cWT-8cKO	Gm4782	-1.81399	-1.81399	-1.81399	-1.81399	-1.81399	-1.81399	-1.81399	-1.81399	-1.81399	-1.81399	-1.81399	-1.81399	-0.242772	-1.81399	1.60464	0.856665	4.00849	-1.81399	3.54132	-1.81399	-1.81399	3.75679	-1.81399	-1.47068	-1.20569	-1.81399	-1.26137	-1.31136	4.48611	-1.81399	3.27825	3.13016	-1.81399	6.19214	3.81771	-1.81399	0.566096
ENSMUSG00000030650	Tmc5	Tmc5	74424	-7.38308	1.82651	10.7892	0.00158443	0.0388466	down	NA	8cWT-8cKO	Tmc5	-1.81399	-1.81399	-1.81399	-1.81399	-1.81399	-1.81399	-1.81399	-1.81399	-1.81399	-1.81399	-1.81399	-1.35668	-1.81399	-1.81399	-1.1781	-1.3727	-1.81399	-1.81399	2.44772	-1.1431	5.00156	2.65095	-1.81399	1.86645	-1.81399	4.37403	-1.81399	3.12111	-1.81399	-1.81399	-1.23101	-1.81399	-1.81399	-1.81399	-1.81399	5.54366	-1.81399
ENSMUSG00000024885	Aldh3b1	Aldh3b1	67689	-7.37643	0.293284	10.3219	0.00199535	0.043753	down	NA	8cWT-8cKO	Aldh3b1	-1.81399	-1.81399	-1.81399	0.109239	-1.81399	-1.81399	-1.81399	-1.81399	-1.81399	-1.81399	-1.81399	-1.81399	-1.81399	-1.81399	3.08338	-1.81399	-1.81399	-1.81399	-1.81399	-1.81399	-1.81399	0.398643	-1.81399	-1.81399	-1.20569	-1.81399	-1.81399	-1.81399	-1.81399	-1.81399	-1.81399	-1.81399	-1.81399	-1.81399	4.55818	-1.81399	-1.81399
ENSMUSG00000018740	Slc25a35	Slc25a35	71998	-7.34788	1.6094	10.0755	0.00216677	0.0457774	down	NA	8cWT-8cKO	Slc25a35	-1.81399	-1.81399	-1.81399	2.33626	-1.81399	-1.81399	-1.81399	-1.81399	-1.35775	-1.81399	-1.81399	-1.81399	-1.81399	-1.81399	-1.81399	0.856665	-1.81399	-1.81399	1.81408	1.99595	-1.81399	-1.81399	1.45365	4.89246	-1.81399	-1.81399	-1.81399	3.6155	-1.81399	-1.81399	-1.81399	0.21971	5.4602	-1.81399	-1.81399	-1.81399	-1.81399
ENSMUSG00000023289	Sva	Sva	20939	-7.34409	0.712708	11.267	0.00132823	0.0358968	down	NA	8cWT-8cKO	Sva	-1.81399	-1.81399	-1.81399	-1.81399	-1.81399	-1.81399	-1.81399	-1.81399	-1.81399	-1.81399	-1.81399	-1.81399	-1.81399	-1.81399	-1.46129	-1.81399	3.03376	0.922208	-1.81399	-1.81399	-1.0235	-0.144454	-0.881557	-1.19357	-1.81399	-1.81399	3.70353	0.771344	0.359045	-1.81399	-1.81399	3.82231	-1.81399	-1.81399	3.19636	-1.81399	-1.81399
ENSMUSG00000073778	NA	ENSMUSG00000073778	NA	-7.33014	2.45773	10.5171	0.00180041	0.0414789	down	NA	8cWT-8cKO	ENSMUSG00000073778	-1.81399	-1.81399	-1.81399	-1.81399	-1.81399	-1.81399	-1.81399	-0.879239	-1.81399	-1.81399	-1.81399	-1.00997	-1.81399	-1.81399	2.92782	-1.81399	-1.81399	-1.81399	2.02517	3.57322	-1.81399	3.02534	0.656536	-1.81399	-0.450327	5.77781	-1.81399	-1.81399	-1.81399	-1.81399	-1.81399	-1.81399	-1.81399	-1.81399	-1.81399	-1.81399	6.81658
ENSMUSG00000094328	Tdpoz9	Tdpoz9	668359	-7.32188	1.84018	11.9435	0.000940468	0.0309633	down	NA	8cWT-8cKO	Tdpoz9	0.0184512	-1.81399	-1.81399	-1.81399	-1.81399	-1.81399	-1.81399	-1.81399	-1.81399	-1.81399	-1.81399	-1.81399	-1.81399	-1.81399	4.06577	-1.81399	2.9081	-1.81399	2.42309	3.13548	2.79181	1.46763	-1.81399	4.25404	-0.779127	-1.81399	4.98241	-0.189198	-1.81399	0.191513	-1.81399	-1.81399	4.4534	-1.81399	-1.81399	-1.81399	-1.81399
ENSMUSG00000078877	Gm14295	Gm14295	100039123	-7.28692	1.52126	10.8595	0.00149264	0.0379927	down	NA	8cWT-8cKO	Gm14295	-1.81399	-1.45587	-1.81399	0.109239	-1.81399	-1.81399	-1.81399	-1.81399	-1.81399	-1.81399	-1.81399	-1.35668	-1.81399	-1.81399	0.55177	4.73006	2.64098	-1.81399	0.157659	-1.81399	-1.81399	-1.81399	4.04982	-1.81399	-1.81399	-1.81399	-1.81399	-1.81399	-1.81399	1.61893	4.01304	4.30426	-1.81399	-1.81399	2.24044	-1.81399	-1.81399
ENSMUSG00000042631	Xkr7	Xkr7	228787	-7.25636	0.746238	9.63408	0.00276449	0.0494008	down	NA	8cWT-8cKO	Xkr7	-1.81399	-1.81399	-1.81399	-1.81399	-1.81399	-0.215469	-1.81399	-1.81399	-1.81399	-1.81399	-1.81399	-1.81399	-1.81399	-1.81399	-1.81399	-1.81399	-1.81399	-1.81399	-1.81399	-1.81399	-0.51573	-1.81399	-1.81399	-1.47068	-1.81399	4.83646	-1.81399	-1.81399	-1.81399	-1.81399	-1.49325	-1.81399	-1.81399	4.43919	-1.81399	-1.81399	-1.81399
ENSMUSG00000113775	NA	ENSMUSG00000113775	NA	-7.2467	0.441462	10.3301	0.00204726	0.0443066	down	NA	8cWT-8cKO	ENSMUSG00000113775	-1.81399	-1.81399	-1.81399	-1.81399	-1.81399	-1.81399	-1.81399	-1.81399	-1.81399	-1.81399	-1.81399	-1.81399	-1.81399	-1.81399	0.47209	-1.3727	-1.81399	-1.81399	2.90439	-1.81399	-1.81399	-1.81399	-1.81399	3.1691	-1.20569	-1.81399	-1.81399	-0.398674	-1.81399	-1.81399	-1.81399	-1.81399	4.33543	0.810367	-1.81399	-1.81399	-1.81399
ENSMUSG00000111448	Olfr912	Olfr912	258806	-7.21085	1.0685	14.1025	0.000356728	0.0186091	down	NA	8cWT-8cKO	Olfr912	-1.81399	-1.81399	-1.12177	-1.81399	-1.81399	-1.81399	-1.81399	-1.81399	-1.81399	-1.81399	-1.81399	-1.81399	-1.81399	-1.81399	2.78674	1.33525	2.92673	-1.21483	1.09169	0.37261	-0.51573	0.398643	-0.881557	-0.961208	3.89742	2.30228	1.95178	-0.189198	-0.696359	0.439729	-1.81399	2.5595	2.56951	-1.81399	3.11653	-1.81399	-1.81399
ENSMUSG00000117425	NA	ENSMUSG00000117425	NA	-7.19835	0.570083	10.6746	0.00174454	0.0406677	down	NA	8cWT-8cKO	ENSMUSG00000117425	-1.81399	-1.81399	-1.81399	-1.81399	-1.81399	-1.81399	-1.81399	-1.81399	-1.81399	-1.81399	-1.81399	-1.81399	-1.81399	-1.81399	-1.1781	-1.81399	-0.567522	-1.81399	-1.40834	-1.81399	-1.81399	-1.02569	-1.81399	-1.47068	-1.81399	1.84975	2.76318	-1.81399	3.6548	-1.81399	2.46576	-1.81399	-1.81399	3.94455	-0.912872	-1.81399	-1.81399
ENSMUSG00000037997	Parp11	Parp11	101187	-7.1899	1.70912	10.5339	0.00174145	0.0406677	down	NA	8cWT-8cKO	Parp11	1.21668	-1.81399	1.78101	-1.81399	-1.81399	-1.81399	-1.81399	-1.81399	-1.81399	-1.81399	-0.773871	-1.35668	-1.81399	-1.81399	-1.1781	-1.81399	-1.81399	-1.81399	-1.40834	2.4383	-1.81399	-1.81399	3.49383	-1.81399	-1.81399	-1.81399	3.46424	-1.31136	0.359045	4.97135	-1.81399	0.867557	5.4027	-1.01655	0.678306	-1.81399	-1.81399
ENSMUSG00000110664	Aprt-ps	Aprt-ps	621377	-7.17264	0.608137	10.7428	0.00163793	0.0396274	down	NA	8cWT-8cKO	Aprt-ps	-1.81399	-1.45587	-1.81399	-1.81399	-1.81399	-1.81399	-1.81399	-1.81399	-1.81399	-1.81399	-1.81399	-1.81399	-1.81399	-1.81399	-1.81399	-1.81399	-1.81399	2.89897	-1.81399	-1.43989	-0.140895	-1.81399	-1.81399	-1.81399	2.86687	-1.81399	-0.0768469	1.20135	2.82889	-1.81399	-1.81399	-1.81399	-1.81399	-1.81399	4.35286	-1.81399	-1.81399
ENSMUSG00000032816	Igdcc4	Igdcc4	56741	-7.1504	0.584657	10.2064	0.0021689	0.0457774	down	NA	8cWT-8cKO	Igdcc4	-1.81399	-1.81399	-1.81399	-1.81399	-1.81399	-1.81399	-1.81399	-1.81399	-1.81399	-1.81399	-1.81399	-1.81399	-1.81399	-1.81399	-1.81399	-1.81399	-1.81399	-1.81399	-1.81399	0.0595224	-1.0235	-1.81399	3.84459	-1.19357	-1.81399	2.48449	2.18022	-1.81399	-1.81399	-1.81399	3.41861	-1.81399	-0.915587	-1.81399	-1.81399	3.27529	-1.81399
ENSMUSG00000028630	Dyrk2	Dyrk2	69181	-7.13723	0.162169	10.3986	0.00198291	0.043653	down	NA	8cWT-8cKO	Dyrk2	-1.81399	-1.81399	-1.81399	-1.81399	-1.81399	-1.81399	-1.81399	-1.81399	-1.81399	-1.81399	-1.81399	-1.81399	-1.81399	-1.81399	-1.46129	-1.81399	-1.06013	-1.81399	-1.81399	-1.81399	-1.81399	-1.81399	-1.81399	-1.19357	-0.182729	3.17778	-1.81399	-1.31136	-1.81399	-0.487658	-1.81399	-1.81399	-1.81399	-1.81399	4.28753	-1.81399	-1.81399
ENSMUSG00000009281	Rarres2	Rarres2	71660	-7.13393	-0.237519	10.1071	0.00227192	0.0462874	down	NA	8cWT-8cKO	Rarres2	-1.81399	-1.81399	-1.81399	-1.81399	-1.81399	-1.81399	-1.81399	-1.81399	-1.81399	-1.81399	-1.81399	-1.81399	-1.81399	-1.81399	-1.81399	-1.81399	-1.81399	-1.81399	-1.81399	-1.81399	-1.81399	-1.81399	-1.81399	2.0102	-1.81399	-1.81399	-1.81399	-1.81399	-1.81399	-1.81399	-1.81399	-1.81399	-1.81399	-1.81399	-1.81399	4.34571	-1.81399
ENSMUSG00000089371	Mir1938	Mir1938	100316693	-7.12345	-0.270008	9.79062	0.00263602	0.0486814	down	NA	8cWT-8cKO	Mir1938	-1.81399	-1.81399	-1.81399	-1.81399	-1.81399	-1.81399	-1.81399	-1.81399	-1.81399	-1.81399	-1.81399	-1.81399	-1.81399	-1.81399	-1.81399	2.62916	-1.81399	-1.81399	-1.81399	-1.81399	-1.81399	-1.81399	-1.81399	-1.81399	-1.81399	-1.81399	-1.81399	-1.81399	-1.81399	-1.81399	-1.81399	-1.81399	-1.81399	-1.81399	-1.81399	-1.81399	4.36585
ENSMUSG00000100621	NA	ENSMUSG00000100621	NA	-7.11536	1.2447	11.1842	0.00133386	0.0359904	down	NA	8cWT-8cKO	ENSMUSG00000100621	-1.81399	-1.81399	-1.81399	-1.81399	-1.81399	-0.803809	-1.81399	-1.81399	-1.81399	-1.81399	-1.81399	-1.81399	-1.81399	-1.81399	0.202664	0.380766	-1.81399	4.00878	3.98165	-1.81399	3.35688	1.23397	-1.81399	3.29798	-1.81399	-1.81399	0.564726	-1.81399	-0.352013	-1.81399	-1.81399	-0.261079	4.26343	-1.81399	-1.81399	-1.81399	-1.81399
ENSMUSG00000112219	NA	ENSMUSG00000112219	NA	-7.10832	0.622578	10.3161	0.00206064	0.044314	down	NA	8cWT-8cKO	ENSMUSG00000112219	-1.81399	-1.81399	-1.81399	-1.81399	-1.81399	-1.81399	-1.81399	-1.81399	-1.81399	-1.81399	-1.81399	-1.81399	-1.81399	-1.81399	-1.1781	2.01779	-1.81399	3.24926	2.42309	-1.81399	-1.81399	-1.81399	2.91054	-1.81399	-1.81399	-1.81399	-1.26137	-0.189198	-1.81399	-1.81399	-1.81399	3.21807	3.40665	-1.81399	-1.81399	-1.81399	-1.81399
ENSMUSG00000063681	Crb1	Crb1	170788	-7.0843	1.90061	11.177	0.00128545	0.035432	down	NA	8cWT-8cKO	Crb1	-1.21727	0.407205	-1.81399	-1.81399	0.0596176	-1.81399	-1.81399	-1.81399	-1.35775	-1.81399	-1.81399	-1.81399	-1.81399	-1.81399	2.68439	-1.81399	3.01647	3.18103	4.31854	2.02609	-1.81399	3.06152	3.8184	-1.19357	-1.81399	4.2385	-1.81399	-1.81399	-0.696359	5.23221	-1.81399	-1.81399	-1.81399	-1.81399	-1.81399	-1.81399	-1.81399
ENSMUSG00000036545	Adamts2	Adamts2	216725	-7.08362	0.133139	10.1795	0.0021963	0.0460033	down	NA	8cWT-8cKO	Adamts2	-1.81399	-1.81399	-1.81399	-1.81399	-1.81399	-1.81399	-1.81399	-1.81399	-1.81399	-1.81399	-1.81399	-1.81399	-1.81399	-1.81399	-1.81399	-1.81399	-0.372641	-1.81399	-1.40834	-1.81399	-1.81399	-1.81399	3.24135	-1.81399	-1.81399	-1.81399	-1.81399	-1.81399	-1.81399	-1.81399	3.48398	-0.987281	-1.81399	-1.81399	3.01744	-1.81399	-1.81399
ENSMUSG00000113189	B020018J22Rik	B020018J22Rik	100126692	-7.06052	1.20203	9.92205	0.00238639	0.0471169	down	NA	8cWT-8cKO	B020018J22Rik	-1.81399	-1.81399	-1.81399	-1.81399	-1.81399	-1.81399	-1.81399	-1.81399	-1.81399	-1.81399	-1.81399	-1.35668	-1.81399	-1.81399	-1.81399	-1.03526	0.541531	-1.81399	2.90439	-1.81399	1.57634	-1.81399	-1.81399	-1.81399	3.91179	0.803387	-1.81399	3.49933	-1.81399	-1.81399	3.69588	-1.81399	-1.81399	-0.129601	-1.81399	4.55243	-1.81399
ENSMUSG00000026969	Fam166a	Fam166a	68222	-7.01544	-0.0389555	10.2602	0.00211512	0.0451869	down	NA	8cWT-8cKO	Fam166a	-1.81399	-1.81399	-1.81399	-1.81399	-1.81399	-1.81399	-1.81399	-1.81399	-1.81399	-1.81399	-1.81399	-1.81399	-1.81399	-1.81399	-1.81399	-1.81399	-1.81399	1.02958	0.157659	-1.81399	-1.81399	-1.81399	-1.81399	-1.47068	-1.81399	-1.81399	2.13734	-0.398674	-1.81399	-1.81399	-1.81399	-1.81399	4.20696	-1.81399	-1.81399	-1.81399	-1.81399
ENSMUSG00000031534	Smim19	Smim19	102032	-7.01384	1.43555	9.68014	0.00262009	0.0486032	down	NA	8cWT-8cKO	Smim19	2.50464	0.916121	-1.12177	-1.81399	-1.81399	-1.81399	-1.81399	-1.81399	-1.81399	-1.81399	-0.773871	-1.81399	-1.81399	-1.81399	-1.1781	-1.81399	0.884315	-1.81399	-1.81399	0.913821	0.959432	4.5254	0.398257	-1.81399	2.71128	-1.81399	0.429066	-0.189198	-1.14955	-1.81399	-1.81399	-1.34221	-1.81399	-1.81399	-1.81399	-1.81399	5.69257
ENSMUSG00000056598	Drc3	Drc3	74665	-6.99793	1.81206	12.0876	0.000841003	0.0293662	down	NA	8cWT-8cKO	Drc3	0.38323	-1.81399	-1.81399	-1.81399	-1.81399	-1.81399	-1.05064	-1.81399	-1.01165	-1.81399	-1.81399	-1.81399	-1.81399	-1.81399	1.36098	-1.81399	-0.567522	-1.21483	-1.40834	-1.81399	2.07972	2.07488	-1.27372	3.19341	0.237992	-0.0764337	-0.0768469	-1.81399	4.3397	-1.81399	4.03813	2.29423	5.19581	-0.129601	4.0787	-0.13463	-1.81399
ENSMUSG00000079505	NA	ENSMUSG00000079505	NA	-6.978	1.40786	11.2649	0.00128497	0.035432	down	NA	8cWT-8cKO	ENSMUSG00000079505	-1.81399	-1.81399	-1.81399	1.41531	-1.81399	-1.81399	-1.81399	-1.81399	-1.81399	-1.81399	-1.81399	-1.81399	-1.81399	-1.81399	-0.738253	3.64339	2.49876	-1.81399	-1.81399	-0.062008	3.6941	-1.02569	-1.81399	4.40736	-1.81399	-1.26118	2.13734	3.21619	0.158614	-0.10847	-1.81399	3.87735	-1.81399	-1.81399	1.46029	-1.81399	-1.81399
ENSMUSG00000036904	Fzd8	Fzd8	14370	-6.95626	1.18923	10.0353	0.00228455	0.0464767	down	NA	8cWT-8cKO	Fzd8	0.800197	-1.45587	-1.81399	-1.81399	-1.81399	-0.803809	-1.81399	-1.81399	-1.81399	-1.81399	-1.81399	-1.81399	-1.81399	-1.81399	-1.81399	-1.81399	0.441403	-1.81399	-1.40834	-1.1431	-1.81399	4.90976	-1.81399	-1.81399	-1.81399	-0.862492	-1.81399	-1.81399	4.52832	-1.81399	-0.816967	-0.987281	-1.81399	4.09389	-1.44755	-1.81399	-1.81399
ENSMUSG00000053263	NA	ENSMUSG00000053263	NA	-6.94561	-0.0142253	10.5007	0.00189105	0.0424746	down	NA	8cWT-8cKO	ENSMUSG00000053263	-1.81399	-1.81399	-1.81399	-1.81399	-1.81399	-1.81399	-1.81399	-1.81399	-1.81399	-1.81399	-1.81399	-1.81399	-1.81399	-1.81399	-0.401644	-1.81399	1.68356	-1.81399	-1.81399	-1.81399	-1.81399	-1.81399	0.533169	1.27728	-1.81399	-0.550463	-1.81399	-0.398674	-1.81399	-1.81399	-1.81399	-1.81399	-1.81399	-1.81399	4.12704	-1.81399	-1.81399
ENSMUSG00000100617	NA	ENSMUSG00000100617	NA	-6.93762	0.913228	9.84684	0.00256716	0.0483772	down	NA	8cWT-8cKO	ENSMUSG00000100617	-1.81399	-1.81399	-1.81399	-1.81399	-1.81399	-1.81399	-1.81399	-1.81399	-1.81399	-1.81399	-1.81399	-1.81399	-1.81399	-1.81399	3.91574	-0.761965	2.34097	3.29302	2.12016	0.171606	-1.81399	-1.81399	-1.81399	-1.81399	-1.81399	2.79168	-1.81399	-1.81399	-1.81399	-1.81399	-1.81399	-1.81399	4.12806	-1.81399	-1.81399	-1.81399	-1.81399
ENSMUSG00000079011	NA	ENSMUSG00000079011	NA	-6.93094	1.13505	10.6649	0.00169865	0.0404441	down	NA	8cWT-8cKO	ENSMUSG00000079011	-1.81399	-1.81399	-1.81399	-1.81399	1.35488	-1.81399	-1.81399	-1.81399	-1.81399	-1.81399	-1.81399	-1.81399	-1.81399	-1.81399	2.41288	-1.81399	4.31474	-0.200781	0.272402	1.03732	-1.81399	-1.81399	3.99243	-1.81399	2.15731	1.26855	-1.81399	-0.939318	-1.14955	-1.81399	-1.81399	-1.81399	2.56951	-1.81399	3.54023	-1.81399	-1.81399
ENSMUSG00000061961	Olfr815	Olfr815	258665	-6.92381	2.1401	10.8966	0.0015745	0.0388466	down	NA	8cWT-8cKO	Olfr815	-1.81399	-1.81399	-1.81399	-1.81399	-1.81399	-1.81399	-1.81399	-1.81399	-1.81399	-1.81399	-1.81399	-1.81399	-1.81399	-1.81399	-0.738253	3.5462	-1.06013	-1.81399	2.77413	4.03993	5.54104	-1.81399	4.84328	-1.81399	0.702058	-1.26118	-1.81399	-1.81399	4.58942	-1.00349	-1.49325	-1.81399	-1.81399	-1.81399	4.06459	-1.81399	-1.81399
ENSMUSG00000117759	NA	ENSMUSG00000117759	NA	-6.91459	2.48682	12.3688	0.000774829	0.0280576	down	NA	8cWT-8cKO	ENSMUSG00000117759	-0.796383	-1.81399	-1.81399	-1.81399	-1.81399	-1.81399	-1.81399	-1.81399	-1.81399	-1.81399	-1.81399	-1.81399	-1.81399	-1.81399	-1.81399	2.76495	4.48787	-1.81399	3.10352	4.66044	5.34874	-1.81399	3.49383	3.4868	-1.81399	0.909192	3.98327	3.87061	4.51788	-1.81399	-1.81399	-1.81399	-1.81399	4.09389	-1.81399	-1.81399	-1.81399
ENSMUSG00000085427	6430710C18Rik	6430710C18Rik	76218	-6.90841	2.86241	13.0064	0.000551632	0.0239734	down	NA	8cWT-8cKO	6430710C18Rik	-1.81399	-1.81399	-0.0219397	-1.81399	-1.81399	-1.81399	-1.05064	-1.81399	-1.81399	-1.81399	-1.81399	-1.81399	-1.81399	-1.81399	4.3977	3.79915	4.57905	0.388836	4.48246	5.43929	-1.81399	-1.02569	4.94359	-0.158969	-1.20569	5.91114	0.112196	-1.31136	-1.81399	-1.00349	-1.81399	1.54828	5.20545	-1.81399	-1.44755	-1.81399	-1.81399
ENSMUSG00000100335	2310008N11Rik	2310008N11Rik	72316	-6.87727	-0.18916	10.6232	0.00178656	0.0413572	down	NA	8cWT-8cKO	2310008N11Rik	-1.81399	-1.81399	-1.81399	-1.81399	-1.81399	-1.81399	-1.81399	-1.81399	-1.81399	-1.81399	-1.81399	-1.81399	-1.81399	-1.81399	-1.81399	-1.81399	-1.81399	-1.81399	1.65397	0.463501	-1.0235	-1.81399	-0.57353	-1.81399	-1.81399	-1.81399	-1.81399	-1.81399	-1.81399	2.65244	3.41861	-1.81399	-1.81399	-1.81399	-1.81399	-1.81399	-1.81399
ENSMUSG00000074418	Gm15930	Gm15930	101055673	-6.82183	1.61884	9.68363	0.00267401	0.0489793	down	NA	8cWT-8cKO	Gm15930	-1.81399	-1.81399	-1.81399	-1.81399	-1.81399	-1.81399	-1.81399	-1.81399	-1.81399	-1.81399	-1.81399	-1.35668	-0.824285	-1.81399	-1.81399	-0.00470468	-1.38837	-1.81399	3.54132	2.1407	-1.81399	2.50093	-1.81399	2.28358	-1.81399	4.11126	-1.81399	-1.81399	-1.81399	-1.81399	5.07492	4.32024	-1.81399	-1.01655	2.21511	-1.81399	-1.81399
ENSMUSG00000040489	Sox30	Sox30	214105	-6.80395	2.97092	12.9933	0.000554923	0.0240192	down	NA	8cWT-8cKO	Sox30	-1.81399	-1.45587	-1.81399	-1.81399	-1.81399	-0.803809	-1.81399	-1.81399	-1.81399	-0.229281	-1.81399	-1.81399	-0.824285	-1.31443	-1.81399	0.489333	2.88922	-1.81399	1.65397	4.93116	5.00156	2.00227	-1.27372	-1.81399	6.33681	4.58031	-1.81399	1.125	-1.81399	3.37305	0.0885315	-1.34221	0.597438	-1.81399	2.68985	3.67969	6.07182
ENSMUSG00000087497	2810001G20Rik	2810001G20Rik	66456	-6.76005	0.95484	9.98466	0.00233997	0.0469178	down	NA	8cWT-8cKO	2810001G20Rik	-0.2056	-1.81399	-1.81399	-1.81399	-1.81399	-1.81399	-1.81399	-1.81399	-1.81399	-1.81399	-1.81399	-1.81399	-1.81399	-1.81399	-1.81399	-1.81399	-1.06013	3.68666	2.44772	3.07911	-0.51573	3.86312	-1.27372	1.86645	-1.81399	-1.81399	-1.81399	-1.81399	-1.81399	-1.81399	3.93505	-1.81399	-1.81399	-1.81399	-1.81399	-1.81399	-1.81399
ENSMUSG00000079834	Tmlhe	Tmlhe	192289	-6.74607	-0.169782	11.4737	0.00120855	0.0348128	down	NA	8cWT-8cKO	Tmlhe	-1.81399	-1.81399	-1.81399	-1.81399	-1.81399	-1.81399	-1.81399	-1.81399	-1.81399	-1.81399	-1.81399	-1.81399	-1.81399	-1.81399	0.627278	0.263359	-0.792902	-0.200781	-0.832828	-1.81399	-1.81399	-1.81399	-1.81399	-1.47068	-1.81399	-1.81399	0.429066	1.47181	-1.81399	0.999652	-1.00919	-1.81399	-1.81399	3.73312	-1.44755	-1.81399	-1.81399
ENSMUSG00000003849	Nqo1	Nqo1	18104	-6.74348	1.5835	10.1621	0.00215153	0.045625	down	NA	8cWT-8cKO	Nqo1	-1.21727	-1.81399	-1.81399	0.109239	-1.81399	-1.81399	-1.81399	-1.81399	-1.81399	-1.81399	-1.81399	-1.81399	-1.81399	-1.81399	-1.81399	-1.81399	2.54774	-1.81399	3.02386	4.52456	-1.81399	5.13869	-1.81399	-0.287612	-0.182729	-1.81399	3.44678	-1.81399	-0.0742253	-1.81399	-1.81399	-1.81399	-1.81399	3.90467	-0.912872	-1.81399	-1.81399
ENSMUSG00000101365	NA	ENSMUSG00000101365	NA	-6.74306	2.07954	11.2055	0.00126833	0.035432	down	NA	8cWT-8cKO	ENSMUSG00000101365	-1.81399	0.916121	-1.81399	-1.81399	0.0596176	-1.81399	-1.81399	-1.81399	-1.81399	-1.81399	-1.81399	-1.81399	-1.81399	-1.31443	-1.81399	0.773224	-1.06013	3.82723	-1.81399	3.93266	-1.81399	2.00227	-1.81399	3.88771	-1.20569	3.1348	3.73264	5.24264	1.91763	-1.81399	4.78002	-1.81399	1.57888	-1.81399	-0.705176	-1.81399	-1.81399
ENSMUSG00000062624	Cyp2c67	Cyp2c67	545288	-6.73144	1.09222	9.85309	0.00249071	0.0479895	down	NA	8cWT-8cKO	Cyp2c67	-1.81399	-1.81399	-1.81399	-1.81399	-1.81399	-0.215469	-1.81399	-1.81399	-1.81399	-1.81399	-1.81399	-1.81399	-1.81399	-1.81399	-1.81399	-1.3727	-1.81399	-1.81399	-1.81399	-1.43989	-1.81399	-1.81399	4.84976	2.91516	1.41734	3.70411	-0.862777	-0.939318	-1.81399	-1.81399	-1.81399	-1.81399	0.0307989	-1.81399	3.83445	-1.81399	-1.81399
ENSMUSG00000060843	Ctnna3	Ctnna3	216033	-6.70777	1.98524	9.57431	0.00275742	0.0494008	down	NA	8cWT-8cKO	Ctnna3	-1.81399	-0.72516	-1.81399	-1.81399	-1.81399	-1.81399	-0.554045	-1.81399	-1.81399	-1.81399	-1.81399	-1.81399	-1.81399	-1.81399	3.31796	-1.81399	3.92753	-1.81399	0.960918	5.33783	0.959432	0.608847	-0.881557	3.37437	-1.81399	-1.81399	-1.81399	-1.81399	-1.14955	-1.81399	-1.81399	-1.81399	-1.81399	-1.81399	-1.44755	5.8245	-1.81399
ENSMUSG00000087538	NA	ENSMUSG00000087538	NA	-6.70721	0.383801	10.6484	0.00171181	0.0406457	down	NA	8cWT-8cKO	ENSMUSG00000087538	-1.81399	-1.1692	-1.81399	-1.81399	-1.81399	-1.81399	-1.81399	-1.81399	-1.81399	-1.81399	-1.81399	-1.81399	-1.81399	-1.81399	-1.81399	-1.81399	-1.38837	2.68572	-1.81399	1.03732	3.03035	-1.02569	-1.81399	-1.81399	-1.81399	0.803387	-1.81399	1.80113	1.08024	-1.00349	-1.81399	-0.0824149	3.81198	-1.81399	-1.81399	-1.81399	-1.81399
ENSMUSG00000026185	Igfbp5	Igfbp5	16011	-6.63983	2.88546	10.5435	0.00173347	0.0406677	down	NA	8cWT-8cKO	Igfbp5	-1.21727	-1.81399	-1.81399	-1.81399	-1.81399	-1.81399	-1.81399	-1.81399	-1.81399	-0.229281	0.245778	-1.81399	-1.81399	-0.405205	-1.81399	-1.81399	-1.81399	1.31074	-1.81399	-1.81399	-1.81399	0.955004	4.49217	1.23107	4.77774	-1.81399	-1.81399	4.41045	-0.0742253	-1.81399	-1.81399	-1.81399	2.98219	-1.81399	-1.81399	5.61916	7.08156
ENSMUSG00000071202	Ccdc78	Ccdc78	381077	-6.62738	2.45392	9.58669	0.00274098	0.0494008	down	NA	8cWT-8cKO	Ccdc78	-1.81399	-1.81399	-1.81399	-1.81399	-1.81399	-0.803809	-0.554045	-1.81399	-1.35775	-1.81399	-1.81399	-1.00997	-1.81399	-1.81399	-1.81399	-1.81399	1.84902	-1.81399	2.08919	0.171606	-1.81399	-1.81399	-1.27372	1.6726	-1.81399	6.55725	-1.81399	-0.939318	-1.81399	-1.81399	-1.23101	-1.34221	-1.81399	-1.01655	-1.81399	-1.81399	6.51078
ENSMUSG00000117054	NA	ENSMUSG00000117054	NA	-6.61129	-0.164593	10.1517	0.00222506	0.0460329	down	NA	8cWT-8cKO	ENSMUSG00000117054	-1.81399	-1.81399	-1.81399	-1.81399	-1.81399	-1.81399	-1.81399	-1.81399	-1.81399	-1.81399	-1.81399	-1.81399	-1.81399	-1.81399	-1.81399	-1.81399	2.57162	-1.81399	0.817103	-1.81399	-1.81399	-0.144454	-1.81399	-1.19357	-1.81399	-0.862492	-1.26137	-1.81399	-1.81399	-1.81399	0.429233	-1.81399	-1.81399	3.68684	-1.81399	-1.81399	-1.81399
ENSMUSG00000022639	NA	ENSMUSG00000022639	NA	-6.59416	-0.188837	10.1448	0.00223227	0.0460329	down	NA	8cWT-8cKO	ENSMUSG00000022639	-1.81399	-1.81399	-1.81399	-1.81399	-1.81399	-1.81399	-1.81399	-1.81399	-1.81399	-1.81399	-1.81399	-1.81399	-1.81399	-1.81399	-1.81399	-1.81399	-1.81399	-1.81399	-1.81399	-1.43989	-1.81399	-1.81399	0.533169	-1.19357	-1.81399	-1.81399	-1.81399	2.6349	-1.81399	-1.81399	3.16892	-0.0824149	-1.81399	-1.81399	2.1091	-1.81399	-1.81399
ENSMUSG00000070332	Trim80	Trim80	432613	-6.5861	0.434122	9.67794	0.00277991	0.0494056	down	NA	8cWT-8cKO	Trim80	-1.81399	-1.81399	-1.81399	-1.81399	-1.81399	-1.81399	-1.81399	-1.81399	-1.81399	-1.81399	-1.81399	-1.81399	-1.81399	-1.81399	1.40456	-1.3727	-1.81399	-0.466615	-0.832828	-1.43989	-1.81399	-1.02569	-1.81399	2.8247	-1.81399	3.88357	-1.81399	-1.81399	-1.81399	-1.81399	0.935821	-1.81399	-1.81399	-1.81399	3.58046	-1.81399	-1.81399
ENSMUSG00000049353	Rd3	Rd3	74023	-6.56756	0.454268	10.0257	0.00229494	0.0465742	down	NA	8cWT-8cKO	Rd3	-1.81399	-0.386104	-1.81399	-1.81399	-1.81399	-1.81399	-1.81399	-1.81399	-1.81399	-1.81399	-1.81399	-1.81399	-1.81399	-1.81399	1.67749	-1.81399	-1.81399	-1.81399	-1.81399	-1.81399	-1.81399	-1.02569	-1.27372	3.87273	-1.81399	2.30228	1.18623	-0.189198	-1.14955	-1.81399	-1.81399	0.579697	-1.81399	-1.81399	3.60991	-1.81399	-1.81399
ENSMUSG00000106680	NA	ENSMUSG00000106680	NA	-6.56561	0.351553	9.74853	0.00261771	0.0486032	down	NA	8cWT-8cKO	ENSMUSG00000106680	-1.81399	-1.81399	-0.304395	-1.81399	-1.81399	-1.81399	-1.81399	-1.81399	-1.81399	-1.81399	-1.81399	-1.81399	-1.81399	-1.81399	1.74685	0.773224	-1.06013	-1.81399	3.30566	-1.81399	-1.81399	-1.81399	2.83419	-0.76113	-1.81399	-1.81399	-1.81399	-0.189198	-1.81399	-1.81399	-1.81399	-1.81399	-1.81399	3.75571	-1.81399	-1.81399	-1.81399
ENSMUSG00000037887	Dusp8	Dusp8	18218	-6.5063	0.429539	9.80741	0.00254539	0.048244	down	NA	8cWT-8cKO	Dusp8	-1.21727	-1.81399	1.0255	-1.81399	-1.81399	-1.81399	-1.81399	-1.81399	-1.81399	-1.81399	-1.81399	-1.81399	-1.81399	-1.81399	-1.81399	-1.81399	-0.200979	-1.21483	-1.81399	-1.81399	1.57634	-0.518807	-1.27372	-1.47068	-0.779127	-0.0764337	-1.26137	-1.81399	4.27918	3.66891	-1.81399	-1.81399	-1.81399	-1.81399	-0.912872	-1.81399	-1.81399
ENSMUSG00000094682	Gm6902	Gm6902	628664	-6.49504	1.1009	9.91198	0.00242202	0.0472166	down	NA	8cWT-8cKO	Gm6902	1.02342	-1.81399	-1.81399	-1.81399	-1.81399	-1.81399	-1.81399	-1.81399	-1.81399	-1.81399	-1.81399	-1.81399	-1.81399	-1.81399	3.67008	-0.160071	-1.06013	-1.81399	2.32014	0.37261	-1.81399	4.41787	-1.81399	3.3637	-1.81399	-1.81399	0.112196	-1.81399	1.475	-1.81399	-1.81399	3.39445	-1.81399	-1.81399	1.32476	-1.81399	-1.81399
ENSMUSG00000037594	Clba1	Clba1	217887	-6.46944	2.21964	13.0032	0.000552423	0.0239734	down	NA	8cWT-8cKO	Clba1	0.212339	0.00803897	-0.304395	2.89389	-1.81399	-1.81399	-1.81399	-1.81399	-1.81399	-1.81399	-0.773871	0.0383515	-1.81399	-1.31443	-0.738253	1.73868	-0.0475875	-1.21483	1.26799	2.94358	1.23853	1.35553	-0.319839	2.28358	2.64402	0.565203	1.73878	1.64585	-0.696359	2.1236	2.98762	-1.81399	1.98924	0.810367	2.95761	-1.81399	6.62008
ENSMUSG00000078349	AW011738	AW011738	100382	-6.42136	3.55978	13.7114	0.000400744	0.0198952	down	NA	8cWT-8cKO	AW011738	-1.81399	0.788078	0.89572	-1.81399	0.0596176	2.96044	-1.81399	-0.879239	-1.81399	0.507634	-1.81399	-1.35668	-1.81399	-1.81399	4.37597	4.83151	-1.06013	-1.21483	2.2378	3.81677	5.794	2.78683	6.04812	5.73223	0.409807	5.33592	2.70563	3.25253	-1.14955	-1.00349	-0.647373	-1.81399	-1.81399	-1.81399	2.91104	-1.81399	6.6886
ENSMUSG00000080366	NA	ENSMUSG00000080366	NA	-6.27844	1.48662	12.698	0.000667564	0.0257339	down	NA	8cWT-8cKO	ENSMUSG00000080366	0.0184512	-0.930165	-1.81399	-1.81399	-1.81399	-1.81399	-1.81399	-1.81399	-1.81399	-1.81399	-1.81399	-1.81399	-1.81399	-1.81399	1.74685	-0.532292	1.54568	2.27005	2.63093	0.847867	3.29722	1.35553	3.07439	4.1708	4.21962	-1.26118	-0.294451	2.36302	-0.352013	-1.81399	-0.816967	2.5595	-0.915587	-0.129601	2.05302	-1.81399	-1.81399
[truncated: 445 more rows]

## Sheet: FOURWAY_8cWT-2cWT_DEG
Figure 1–Source Data 2. Differential Gene Expression (DGE) Analysis. Differential gene expression (DGE) analysis was conducted using the four pairwise comparisons shown in Fig. 1C and 1D, with thresholds of |log₂FC| > 1 and adjusted P < 0.05. The ‘expression’ columns indicate whether each transcript is up- or downregulated in any given comparison. The ‘FOUR_WAY_UP_COMP’ and ‘FOUR_WAY_DOWN_COMP’ c…
[truncated: 4,559 more rows]

[truncated: 1 more sheets: FOURWAY_8cKO-2cKO_DEG]
