# Supplementary material for: SETDB1 enables development beyond cleavage stages by extinguishing the MERVL-driven two-cell totipotency transcriptional program in the mouse embryo
Source: eLife. 2026 Feb 16;15:RP109248. doi: 10.7554/eLife.109248 (PMC12908936; doi:10.7554/eLife.109248)
Supplement: Figure 2—source data 1. — ORA was performed using DBTMEE-defined (Park et al., 2015) gene sets as in Sakashita et al., 2023 and DEGs up-/downregulated from the pairwise comparisons. The analysis was run using the function enricher from the R package ClusterProfiler (v4.14.4). Results are shown only for sets with significant enrichment. [file elife-109248-fig2-data1.xlsx]

## Sheet: cluster_gene_v1_Sakashita
Figure 2–Source Data 1. Overrepresentation Analysis (ORA) with DBTMEE Categories. ORA was performed using DBTMEE-defined (Park et al., 2015) gene sets as in Sakashita et al. (Sakashita et al., 2023) and DEGs up/down regulated from the pairwise comparisons. The analysis was run using function enricher from R package ClusterProfiler (v4.14.4). Results are shown only for sets with significant enrich…
ID	Gene	Entrez	Cluster	Correlation
DBTMEE:0000800	3110035E14Rik	76982	1-Cell Transient	0.99748
DBTMEE:0013387	Mstn	17700	1-Cell Transient	0.99748
DBTMEE:0002621	Aox1	11761	1-Cell Transient	0.99126
DBTMEE:0002885	Arpc2	76709	1-Cell Transient	0.9275
DBTMEE:0002355	Akp3	11648	1-Cell Transient	0.99025
DBTMEE:0019785	Spp2	75396	1-Cell Transient	0.99738
DBTMEE:0017439	Ramp1	51801	1-Cell Transient	0.95168
DBTMEE:0018619	Serpinb5	20724	1-Cell Transient	0.99254
DBTMEE:0014264	Nuak2	74137	1-Cell Transient	0.94326
DBTMEE:0004644	Chi3l1	12654	1-Cell Transient	0.99262
DBTMEE:0021150	Tnni1	21952	1-Cell Transient	0.96846
DBTMEE:0003813	Cacna1s	12292	1-Cell Transient	0.99749
DBTMEE:0001096	4930523C07Rik	67647	1-Cell Transient	0.99766
DBTMEE:0021134	Tnfsf4	22164	1-Cell Transient	0.99244
DBTMEE:0010625	Ildr2	100039795	1-Cell Transient	0.9658
DBTMEE:0020266	Tada1	27878	1-Cell Transient	0.96589
DBTMEE:0005049	Copa	12847	1-Cell Transient	0.99668
DBTMEE:0004307	Cd34	12490	1-Cell Transient	0.94354
DBTMEE:0010883	Jph1	57339	1-Cell Transient	0.94484
DBTMEE:0008556	Gm15386		1-Cell Transient	0.99731
DBTMEE:0005917	Defb41		1-Cell Transient	0.99731
DBTMEE:0011925	Lyg1	69541	1-Cell Transient	0.99737
DBTMEE:0002960	Asnsd1	70396	1-Cell Transient	0.96699
DBTMEE:0017468	Raph1	77300	1-Cell Transient	0.98173
DBTMEE:0005657	D630023F18Rik	98303	1-Cell Transient	0.94143
DBTMEE:0005014	Col4a4	12829	1-Cell Transient	0.99794
DBTMEE:0008098	Glrp1	14659	1-Cell Transient	0.99745
DBTMEE:0023314	Zranb3	226409	1-Cell Transient	0.98462
DBTMEE:0011493	Lax1	240754	1-Cell Transient	0.99751
DBTMEE:0006344	Dusp27	240892	1-Cell Transient	0.99746
DBTMEE:0017733	Rgs4	19736	1-Cell Transient	0.99014
DBTMEE:0004035	Ccdc121	403180	1-Cell Transient	0.99744
DBTMEE:0018648	Sertad4	214791	1-Cell Transient	0.99809
DBTMEE:0007680	Frk	14302	1-Cell Transient	0.93567
DBTMEE:0016041	Pdss2	71365	1-Cell Transient	0.9667
DBTMEE:0020365	Tbata	65971	1-Cell Transient	0.99737
DBTMEE:0007714	Ftcd	14317	1-Cell Transient	0.98699
DBTMEE:0017638	Reep6	70335	1-Cell Transient	0.96502
DBTMEE:0015814	Pawr	114774	1-Cell Transient	0.97108
DBTMEE:0005692	D930020B18Rik	216393	1-Cell Transient	0.99137
DBTMEE:0017625	Rdh9	103142	1-Cell Transient	0.9706
DBTMEE:0019315	Smarcc2	68094	1-Cell Transient	0.99569
DBTMEE:0015385	Olfr787	258069	1-Cell Transient	0.97147
DBTMEE:0013540	Myct1	68632	1-Cell Transient	0.99761
DBTMEE:0000971	4930444G20Rik	114671	1-Cell Transient	0.99806
DBTMEE:0020452	Tcf21	21412	1-Cell Transient	0.99767
DBTMEE:0021390	Trmt11	73681	1-Cell Transient	0.99548
DBTMEE:0013969	Nkain2	432450	1-Cell Transient	0.99739
DBTMEE:0006354	Dux	664783	1-Cell Transient	0.99812
DBTMEE:0009705	Gstt1	14871	1-Cell Transient	0.96646
DBTMEE:0003954	Casp14	12365	1-Cell Transient	0.99752
DBTMEE:0016445	Plekhj1	78670	1-Cell Transient	0.97277
DBTMEE:0005268	Csl	71832	1-Cell Transient	0.9723
DBTMEE:0011004	Kcnmb4	58802	1-Cell Transient	0.93431
DBTMEE:0004936	Cnot2	72068	1-Cell Transient	0.97706
DBTMEE:0021463	Tsfm	66399	1-Cell Transient	0.90739
DBTMEE:0005065	Coq10a	210582	1-Cell Transient	0.97066
DBTMEE:0022359	Vmn2r84	625068	1-Cell Transient	0.99883
DBTMEE:0022427	Vstm2a	211739	1-Cell Transient	0.99888
DBTMEE:0021357	Trim58	216781	1-Cell Transient	0.99757
DBTMEE:0014896	Olfr179	404346	1-Cell Transient	0.99764
DBTMEE:0014994	Olfr311	258530	1-Cell Transient	0.99731
DBTMEE:0013559	Myh8	17885	1-Cell Transient	0.998
DBTMEE:0013550	Myh13	544791	1-Cell Transient	0.99741
DBTMEE:0009429	Gp1ba	14723	1-Cell Transient	0.99874
DBTMEE:0022623	Wscd1	216881	1-Cell Transient	0.99789
DBTMEE:0017896	Rnf135	71956	1-Cell Transient	0.95175
DBTMEE:0022566	Expi	14038	1-Cell Transient	0.9973
DBTMEE:0013322	Mrps23	64656	1-Cell Transient	0.97426
DBTMEE:0010216	Hoxb8	15416	1-Cell Transient	0.99872
DBTMEE:0004427	Cdk12	69131	1-Cell Transient	0.9337
DBTMEE:0020119	Sun3	194974	1-Cell Transient	0.99716
DBTMEE:0002087	Actr2	66713	1-Cell Transient	0.99768
DBTMEE:0010759	Irgm1	15944	1-Cell Transient	0.99744
DBTMEE:0001628	9930111J21Rik1		1-Cell Transient	0.99773
DBTMEE:0014754	Olfr1371	276865	1-Cell Transient	0.99373
DBTMEE:0000560	2210407C18Rik	78354	1-Cell Transient	0.99731
DBTMEE:0022932	Zfp286	192651	1-Cell Transient	0.99736
DBTMEE:0007474	Fgf11	14166	1-Cell Transient	0.99731
DBTMEE:0021049	Tmem95	100503361	1-Cell Transient	0.99734
DBTMEE:0015081	Olfr43	258706	1-Cell Transient	0.99736
DBTMEE:0001999	Accn1	11418	1-Cell Transient	0.99776
DBTMEE:0001254	4932411E22Rik	214604	1-Cell Transient	0.99885
DBTMEE:0019676	Spata20	217116	1-Cell Transient	0.97992
DBTMEE:0016296	Pip4k2b	108083	1-Cell Transient	0.97451
DBTMEE:0002852	Arl5c	217151	1-Cell Transient	0.915
DBTMEE:0011306	Krt20	66809	1-Cell Transient	0.99733
DBTMEE:0011321	Krt39	237934	1-Cell Transient	0.99783
DBTMEE:0011318	Krt34	16672	1-Cell Transient	0.99739
DBTMEE:0011300	Krt15	16665	1-Cell Transient	0.99827
DBTMEE:0007976	Gfap	14580	1-Cell Transient	0.98876
DBTMEE:0022587	Wipi1	52639	1-Cell Transient	0.98681
DBTMEE:0001899	Abca6	76184	1-Cell Transient	0.99449
DBTMEE:0007009	Fads6	328035	1-Cell Transient	0.99741
DBTMEE:0009851	H3f3b	15081	1-Cell Transient	0.97071
DBTMEE:0006923	Evpl	14027	1-Cell Transient	0.98046
DBTMEE:0019943	St6galnac1	20445	1-Cell Transient	0.99736
DBTMEE:0019611	Sostdc1	66042	1-Cell Transient	0.99755
DBTMEE:0002273	Agmo	319660	1-Cell Transient	0.99737
DBTMEE:0021566	Ttc9	69480	1-Cell Transient	0.99152
DBTMEE:0017884	Rnf113a2	66381	1-Cell Transient	0.98104
DBTMEE:0014214	Nrxn3	18191	1-Cell Transient	0.99799
DBTMEE:0018844	Siva1	30954	1-Cell Transient	0.9676
DBTMEE:0020916	Tmem196	217951	1-Cell Transient	0.99764
DBTMEE:0017311	Rab10	19325	1-Cell Transient	0.9719
DBTMEE:0013363	Msgn1	56184	1-Cell Transient	0.99742
DBTMEE:0002039	Acp1	11431	1-Cell Transient	0.91724
DBTMEE:0017431	Ralgapa1	56784	1-Cell Transient	0.99772
DBTMEE:0004809	Clec14a	66864	1-Cell Transient	0.99863
DBTMEE:0007648	Foxn3	71375	1-Cell Transient	0.90859
DBTMEE:0018593	Serpina3c	16625	1-Cell Transient	0.9974
DBTMEE:0018194	Rtl1	353326	1-Cell Transient	0.99855
DBTMEE:0002362	Akr1c13	27384	1-Cell Transient	0.99735
DBTMEE:0010413	Idi1	319554	1-Cell Transient	0.99078
DBTMEE:0010095	Hist1h4j	319159	1-Cell Transient	0.97818
DBTMEE:0022116	Vmn1r188	252912	1-Cell Transient	0.99753
DBTMEE:0022133	Vmn1r203	171270	1-Cell Transient	0.99754
DBTMEE:0022134	Vmn1r204	632793	1-Cell Transient	0.99735
DBTMEE:0010093	Hist1h4h	69386	1-Cell Transient	0.99004
DBTMEE:0010048	Hist1h1d	14957	1-Cell Transient	0.94435
DBTMEE:0010080	Hist1h3b	319150	1-Cell Transient	0.96612
DBTMEE:0018623	Serpinb6d	238568	1-Cell Transient	0.99734
DBTMEE:0017547	Rbm24	666794	1-Cell Transient	0.99754
DBTMEE:0015945	Pcsk1	18548	1-Cell Transient	0.99753
DBTMEE:0002898	Arrdc3	105171	1-Cell Transient	0.99714
DBTMEE:0002575	Ankrd55	77318	1-Cell Transient	0.99977
DBTMEE:0006878	Esm1	71690	1-Cell Transient	0.99777
DBTMEE:0000849	4833420G17Rik	67392	1-Cell Transient	0.9967
DBTMEE:0013456	Mtr	238505	1-Cell Transient	0.98045
DBTMEE:0001698	A530099J19Rik	319293	1-Cell Transient	0.99744
DBTMEE:0022138	Vmn1r208	171252	1-Cell Transient	0.99732
DBTMEE:0014306	Nup153	218210	1-Cell Transient	0.95142
DBTMEE:0006272	Drd1a	13488	1-Cell Transient	0.99813
DBTMEE:0010622	Il9	16198	1-Cell Transient	0.99731
DBTMEE:0023180	Zfp87	170763	1-Cell Transient	0.94686
DBTMEE:0020888	Tmem174	68344	1-Cell Transient	0.9974
DBTMEE:0004529	Cenph	26886	1-Cell Transient	0.96237
DBTMEE:0009781	Gzma	14938	1-Cell Transient	0.99738
DBTMEE:0009041	Gm5460	432838	1-Cell Transient	0.99746
DBTMEE:0002605	Antxrl	239029	1-Cell Transient	0.9987
DBTMEE:0011759	Lrit2	239038	1-Cell Transient	0.99791
DBTMEE:0016529	Pnp	18950	1-Cell Transient	0.90875
DBTMEE:0021232	Tppp2	219038	1-Cell Transient	0.99736
DBTMEE:0017942	Rnf31	268749	1-Cell Transient	0.99295
DBTMEE:0017628	Rec8	56739	1-Cell Transient	0.93407
DBTMEE:0011015	Kcnrg	328424	1-Cell Transient	0.99508
DBTMEE:0009042	Gm5464	432870	1-Cell Transient	0.99732
DBTMEE:0013991	Nkx3-1	18095	1-Cell Transient	0.99451
DBTMEE:0006575	Egr3	13655	1-Cell Transient	0.99748
DBTMEE:0020712	Timm8a2	223262	1-Cell Transient	0.9628
DBTMEE:0007028	Fam107a	268709	1-Cell Transient	0.99748
DBTMEE:0017718	Rgr	57811	1-Cell Transient	0.99733
DBTMEE:0001056	4930503E14Rik	74954	1-Cell Transient	0.95633
DBTMEE:0010886	Jph4	319984	1-Cell Transient	0.99888
DBTMEE:0022671	Xpo7	65246	1-Cell Transient	0.97591
DBTMEE:0000072	1200011I18Rik	67467	1-Cell Transient	0.98047
DBTMEE:0020011	Stk24	223255	1-Cell Transient	0.92529
DBTMEE:0007757	Fyb	23880	1-Cell Transient	0.97343
DBTMEE:0021302	Trhr	22045	1-Cell Transient	0.95873
DBTMEE:0012194	Mchr1	207911	1-Cell Transient	0.99748
DBTMEE:0002824	Arid2	77044	1-Cell Transient	0.98416
DBTMEE:0001816	AI836003	239650	1-Cell Transient	0.99742
DBTMEE:0002732	Aqp5	11830	1-Cell Transient	0.99746
DBTMEE:0018231	Rxfp3	239336	1-Cell Transient	0.99795
DBTMEE:0001967	Abra	223513	1-Cell Transient	0.99734
DBTMEE:0021108	Tnfrsf11b	18383	1-Cell Transient	0.99734
DBTMEE:0011012	Kcnq3	110862	1-Cell Transient	0.99794
DBTMEE:0010999	Kcnk9	223604	1-Cell Transient	0.99733
DBTMEE:0009139	Gm628	268816	1-Cell Transient	0.99874
DBTMEE:0000199	1700016M24Rik	69439	1-Cell Transient	0.99758
DBTMEE:0002711	Apol9a	223672	1-Cell Transient	0.99736
DBTMEE:0019914	Sstr3	20607	1-Cell Transient	0.99868
DBTMEE:0006734	Endou	19011	1-Cell Transient	0.96955
DBTMEE:0023082	Zfp641	239652	1-Cell Transient	0.99748
DBTMEE:0005817	Ddn	13199	1-Cell Transient	0.90751
DBTMEE:0016726	Ppp1r1a	58200	1-Cell Transient	0.99739
DBTMEE:0019382	Snai2	20583	1-Cell Transient	0.93662
DBTMEE:0012078	Mapk1	26413	1-Cell Transient	0.92322
DBTMEE:0006631	Eif4a2	13682	1-Cell Transient	0.92953
DBTMEE:0002206	Adipoq	11450	1-Cell Transient	0.96602
DBTMEE:0019574	Snx4	69150	1-Cell Transient	0.97222
DBTMEE:0013573	Mylk	107589	1-Cell Transient	0.99373
DBTMEE:0009412	Golgb1	224139	1-Cell Transient	0.97776
DBTMEE:0004275	Cd200r4	239849	1-Cell Transient	0.99802
DBTMEE:0004273	Cd200r2	271375	1-Cell Transient	0.99734
DBTMEE:0000606	2310034C09Rik	117172	1-Cell Transient	0.99733
DBTMEE:0017977	Rogdi	66049	1-Cell Transient	0.91275
DBTMEE:0021158	Tnp2	21959	1-Cell Transient	0.9973
DBTMEE:0016919	Prm1	19118	1-Cell Transient	0.99734
DBTMEE:0009430	Gp1bb		1-Cell Transient	0.91758
DBTMEE:0018563	Sept5		1-Cell Transient	0.91758
DBTMEE:0000960	4930435E12Rik	74663	1-Cell Transient	0.99735
DBTMEE:0000634	2310079G19Rik	69699	1-Cell Transient	0.99758
DBTMEE:0011362	Krtap16-5	77918	1-Cell Transient	0.99738
DBTMEE:0001171	4930563D23Rik	75328	1-Cell Transient	0.98168
DBTMEE:0003616	Brwd1	93871	1-Cell Transient	0.93325
DBTMEE:0020235	T	20997	1-Cell Transient	0.99202
DBTMEE:0022367	Vmn2r91	665210	1-Cell Transient	0.99747
DBTMEE:0022163	Vmn1r230	171231	1-Cell Transient	0.99732
DBTMEE:0022275	Vmn2r116	619697	1-Cell Transient	0.99743
DBTMEE:0023059	Zfp598	213753	1-Cell Transient	0.98041
DBTMEE:0017095	Psmb8	16913	1-Cell Transient	0.99735
DBTMEE:0009821	H2-M3	14991	1-Cell Transient	0.97744
DBTMEE:0014494	Olfr108	258457	1-Cell Transient	0.99767
DBTMEE:0014622	Olfr123	258623	1-Cell Transient	0.99735
DBTMEE:0017593	Rcan2	53901	1-Cell Transient	0.93928
DBTMEE:0005200	Crip3	114570	1-Cell Transient	0.99739
DBTMEE:0019942	St6gal2	240119	1-Cell Transient	0.97851
DBTMEE:0016774	Ppp4r1	70351	1-Cell Transient	0.99313
DBTMEE:0017494	Rasgrp3	240168	1-Cell Transient	0.97609
DBTMEE:0020893	Tmem178	68027	1-Cell Transient	0.99733
DBTMEE:0022626	Wtap	60532	1-Cell Transient	0.90098
DBTMEE:0022267	Vmn2r109	627814	1-Cell Transient	0.95897
DBTMEE:0021718	Ube2i	22196	1-Cell Transient	0.92103
DBTMEE:0013173	Morc2b	240069	1-Cell Transient	0.99745
DBTMEE:0021097	Tnf	21926	1-Cell Transient	0.98681
DBTMEE:0001619	9830107B12Rik	328829	1-Cell Transient	0.99744
DBTMEE:0001694	A530064D06Rik	328830	1-Cell Transient	0.98949
DBTMEE:0016627	Pot1b	72836	1-Cell Transient	0.95293
DBTMEE:0001936	Abcg5	27409	1-Cell Transient	0.99767
DBTMEE:0019834	Srbd1	78586	1-Cell Transient	0.98171
DBTMEE:0017324	Rab18	19330	1-Cell Transient	0.96783
DBTMEE:0010265	Hrh4	225192	1-Cell Transient	0.99746
DBTMEE:0006294	Dsg3	13512	1-Cell Transient	0.97443
DBTMEE:0021591	Ttr	22139	1-Cell Transient	0.99749
DBTMEE:0022954	Zfp35	22694	1-Cell Transient	0.93775
DBTMEE:0015873	Pcdhb10	93881	1-Cell Transient	0.99909
DBTMEE:0015886	Pcdhb22	93893	1-Cell Transient	0.99737
DBTMEE:0018396	Scgb3a2	117158	1-Cell Transient	0.99733
DBTMEE:0013836	Nedd4l	83814	1-Cell Transient	0.93534
DBTMEE:0002553	Ankrd29	225187	1-Cell Transient	0.99755
DBTMEE:0015811	Patl1	225929	1-Cell Transient	0.98191
DBTMEE:0005499	Cyp2c55	72082	1-Cell Transient	0.98857
DBTMEE:0019280	Slk	20874	1-Cell Transient	0.99907
DBTMEE:0005375	Ctsw	13041	1-Cell Transient	0.99767
DBTMEE:0016397	Plcb3	18797	1-Cell Transient	0.97448
DBTMEE:0002536	Ankrd1	107765	1-Cell Transient	0.99796
DBTMEE:0017583	Rbp4	19662	1-Cell Transient	0.97373
DBTMEE:0020746	Tll2	24087	1-Cell Transient	0.96809
DBTMEE:0011717	Loxl4	67573	1-Cell Transient	0.99965
DBTMEE:0016052	Pdzd7	100503041	1-Cell Transient	0.98614
DBTMEE:0017153	Ptf1a	19213	1-Cell Transient	0.99792
DBTMEE:0006767	Entpd8	72090	1-Cell Transient	0.97769
DBTMEE:0020934	Tmem210	78217	1-Cell Transient	0.99737
DBTMEE:0007741	Fut7	14347	1-Cell Transient	0.99733
DBTMEE:0011531	Lcn5	13863	1-Cell Transient	0.99734
DBTMEE:0021875	Upp2	76654	1-Cell Transient	0.99738
DBTMEE:0003407	Bbs5	72569	1-Cell Transient	0.95709
DBTMEE:0007820	Gad1	14415	1-Cell Transient	0.99183
DBTMEE:0019647	Sp9	381373	1-Cell Transient	0.9971
DBTMEE:0010234	Hoxd8	15437	1-Cell Transient	0.9503
DBTMEE:0014308	Nup160	59015	1-Cell Transient	0.99407
DBTMEE:0010924	Kbtbd4	67136	1-Cell Transient	0.99271
DBTMEE:0014674	Olfr1283	228443	1-Cell Transient	0.99753
DBTMEE:0016192	Phgr1	53906	1-Cell Transient	0.99738
DBTMEE:0018190	Rtf1	76246	1-Cell Transient	0.99508
DBTMEE:0021619	Tubgcp4	51885	1-Cell Transient	0.99259
DBTMEE:0006353	Dut	110074	1-Cell Transient	0.99149
DBTMEE:0000050	1110034G24Rik	73747	1-Cell Transient	0.98333
DBTMEE:0001119	4930529M08Rik	78774	1-Cell Transient	0.91124
DBTMEE:0007541	Fkbp1a	14225	1-Cell Transient	0.9924
DBTMEE:0003576	Bpil1	66557	1-Cell Transient	0.99737
DBTMEE:0017979	Romo1	67067	1-Cell Transient	0.97655
DBTMEE:0003569	Bpi	329547	1-Cell Transient	0.99738
DBTMEE:0002788	Arhgap40	545481	1-Cell Transient	0.99933
DBTMEE:0017586	Rbpjl	19668	1-Cell Transient	0.9988
DBTMEE:0022558	Wfdc10	629756	1-Cell Transient	0.99737
DBTMEE:0012180	Mc3r	17201	1-Cell Transient	0.9978
DBTMEE:0020058	Stx16	228960	1-Cell Transient	0.95599
DBTMEE:0010320	Hspa14	50497	1-Cell Transient	0.97162
DBTMEE:0016954	Prpf18	67229	1-Cell Transient	0.90592
DBTMEE:0001369	4933433C11Rik	74472	1-Cell Transient	0.97736
DBTMEE:0019067	Slc2a6	227659	1-Cell Transient	0.99734
DBTMEE:0022845	Zeb2	24136	1-Cell Transient	0.97238
DBTMEE:0010965	Kcnh7	170738	1-Cell Transient	0.99742
DBTMEE:0019370	Smtnl1	68678	1-Cell Transient	0.99743
DBTMEE:0017000	Prrg4	228413	1-Cell Transient	0.97584
DBTMEE:0017603	Rcn1	19672	1-Cell Transient	0.95984
DBTMEE:0008056	Gjd2	14617	1-Cell Transient	0.99751
DBTMEE:0007895	Gatm	67092	1-Cell Transient	0.9943
DBTMEE:0017939	Rnf24	51902	1-Cell Transient	0.9813
DBTMEE:0000864	4921509C19Rik	381393	1-Cell Transient	0.99741
DBTMEE:0013914	Nfs1	18041	1-Cell Transient	0.97501
DBTMEE:0022569	Wfdc5	209232	1-Cell Transient	0.99747
DBTMEE:0012145	Matn4	17183	1-Cell Transient	0.9764
DBTMEE:0021355	Trim55	381485	1-Cell Transient	0.99734
DBTMEE:0004781	Cldn11	18417	1-Cell Transient	0.99744
DBTMEE:0002075	Actl6a	56456	1-Cell Transient	0.9777
DBTMEE:0019625	Sox2	20674	1-Cell Transient	0.98062
DBTMEE:0007503	Fgg	99571	1-Cell Transient	0.99733
DBTMEE:0018773	Shc1	20416	1-Cell Transient	0.99548
DBTMEE:0017645	Reg4	67709	1-Cell Transient	0.99732
DBTMEE:0000967	4930443G12Rik	74686	1-Cell Transient	0.99732
DBTMEE:0002295	Agxt2l1	71760	1-Cell Transient	0.99885
DBTMEE:0020401	Tbck	271981	1-Cell Transient	0.99139
DBTMEE:0002201	Adh6a	69117	1-Cell Transient	0.9974
DBTMEE:0014403	Odf2l	52184	1-Cell Transient	0.92883
DBTMEE:0016505	Pmp2	18857	1-Cell Transient	0.99734
DBTMEE:0006497	Ect2	13605	1-Cell Transient	0.9207
DBTMEE:0004054	Ccdc144b	241943	1-Cell Transient	0.98327
DBTMEE:0004200	Ccna1	12427	1-Cell Transient	0.99734
DBTMEE:0018795	Shox2	20429	1-Cell Transient	0.98323
DBTMEE:0016992	Prr9	109314	1-Cell Transient	0.99743
DBTMEE:0011514	Lce1l	73730	1-Cell Transient	0.99747
DBTMEE:0003920	Car14	23831	1-Cell Transient	0.99848
DBTMEE:0010108	Hist2h4	97122	1-Cell Transient	0.96955
DBTMEE:0010301	Hsd3b5	15496	1-Cell Transient	0.99738
DBTMEE:0010298	Hsd3b2	15493	1-Cell Transient	0.99837
DBTMEE:0021469	Tshb	22094	1-Cell Transient	0.94197
DBTMEE:0003911	Capza1	12340	1-Cell Transient	0.93851
DBTMEE:0003316	BC051070	229688	1-Cell Transient	0.99753
DBTMEE:0005463	Cym	229697	1-Cell Transient	0.9979
DBTMEE:0016937	Prok1	246691	1-Cell Transient	0.99731
DBTMEE:0007601	Fndc7	320181	1-Cell Transient	0.97755
DBTMEE:0018187	Rtcd1	66368	1-Cell Transient	0.95762
DBTMEE:0021393	Ccdc76	229780	1-Cell Transient	0.95649
DBTMEE:0015748	Palmd	114301	1-Cell Transient	0.99751
DBTMEE:0005639	D3Bwg0562e	229791	1-Cell Transient	0.99888
DBTMEE:0010436	Ifi44	99899	1-Cell Transient	0.99737
DBTMEE:0018451	Sdcbp	53378	1-Cell Transient	0.98111
DBTMEE:0007818	Gabrr2	14409	1-Cell Transient	0.99736
DBTMEE:0006420	E130309F12Rik	272031	1-Cell Transient	0.99771
DBTMEE:0000326	1700042G07Rik	67323	1-Cell Transient	0.9973
DBTMEE:0018178	Rspo1	192199	1-Cell Transient	0.93821
DBTMEE:0017923	Rnf186	66825	1-Cell Transient	0.99768
DBTMEE:0008366	Gm13040	100040854	1-Cell Transient	0.99829
DBTMEE:0013659	Nadk	192185	1-Cell Transient	0.9613
DBTMEE:0005340	Ctnnal1	54366	1-Cell Transient	0.93624
DBTMEE:0021653	Txndc8	67402	1-Cell Transient	0.99744
DBTMEE:0013486	Mup10		1-Cell Transient	0.99735
DBTMEE:0013487	Mup11		1-Cell Transient	0.99735
DBTMEE:0022969	Zfp37	22696	1-Cell Transient	0.99882
DBTMEE:0021135	Tnfsf8	21949	1-Cell Transient	0.99744
DBTMEE:0004565	Cer1	12622	1-Cell Transient	0.99734
DBTMEE:0022538	Wdr78	242584	1-Cell Transient	0.9746
DBTMEE:0018867	Skint6	230622	1-Cell Transient	0.98548
DBTMEE:0008633	Gm1661	381544	1-Cell Transient	0.96577
DBTMEE:0019305	Smap2	69780	1-Cell Transient	0.99915
DBTMEE:0023281	Zmym4	67785	1-Cell Transient	0.96899
DBTMEE:0008050	Gjb4	14621	1-Cell Transient	0.99751
DBTMEE:0021403	Trnau1ap	71787	1-Cell Transient	0.92535
DBTMEE:0022553	Wdtc1	230796	1-Cell Transient	0.98379
DBTMEE:0011641	Lin28a	83557	1-Cell Transient	0.96413
DBTMEE:0000806	3110047P20Rik	319807	1-Cell Transient	0.99747
DBTMEE:0019673	Spata18	73472	1-Cell Transient	0.99751
DBTMEE:0019861	Srp72	66661	1-Cell Transient	0.99815
DBTMEE:0006730	Enam	13801	1-Cell Transient	0.99843
DBTMEE:0016662	Ppbp	57349	1-Cell Transient	0.99734
DBTMEE:0005411	Cxcl1	14825	1-Cell Transient	0.95327
DBTMEE:0016825	Prdm8	77630	1-Cell Transient	0.99736
DBTMEE:0015921	Pcgf3	69587	1-Cell Transient	0.93716
DBTMEE:0009316	Gm9758	381714	1-Cell Transient	0.9974
DBTMEE:0020749	Tlr1	21897	1-Cell Transient	0.99054
DBTMEE:0014394	Ociad2	433904	1-Cell Transient	0.99744
DBTMEE:0021816	Ugt2b1	71773	1-Cell Transient	0.99755
DBTMEE:0007911	Gbp6	100702	1-Cell Transient	0.99767
DBTMEE:0009166	Gm6583	625424	1-Cell Transient	0.99758
DBTMEE:0010336	Hspb8	80888	1-Cell Transient	0.98057
DBTMEE:0017684	Rfc5	72151	1-Cell Transient	0.97321
DBTMEE:0005398	Cux1	13047	1-Cell Transient	0.93496
DBTMEE:0009623	Grifin	77998	1-Cell Transient	0.99731
DBTMEE:0022838	Zdhhc4	72881	1-Cell Transient	0.9449
DBTMEE:0000117	1700001J03Rik	69282	1-Cell Transient	0.98279
DBTMEE:0004681	Chrm2	243764	1-Cell Transient	0.99759
DBTMEE:0020328	Tas2r108	57253	1-Cell Transient	0.98544
DBTMEE:0021449	Try10	436522	1-Cell Transient	0.99758
DBTMEE:0004770	Clcn1	12723	1-Cell Transient	0.98174
DBTMEE:0019904	Sspo	243369	1-Cell Transient	0.99697
DBTMEE:0008021	Gimap4	107526	1-Cell Transient	0.99732
DBTMEE:0016724	Gsbs	19051	1-Cell Transient	0.99694
DBTMEE:0013138	Mmrn1	70945	1-Cell Transient	0.99877
DBTMEE:0011682	Lmcd1	30937	1-Cell Transient	0.99317
DBTMEE:0019195	Slc6a1	232333	1-Cell Transient	0.99769
DBTMEE:0013480	Mug1	17836	1-Cell Transient	0.99746
DBTMEE:0022293	Vmn2r23	435916	1-Cell Transient	0.99777
DBTMEE:0004387	Cdca3	14793	1-Cell Transient	0.99525
DBTMEE:0003913	Capza3	12344	1-Cell Transient	0.99792
DBTMEE:0018908	Slc13a4	243755	1-Cell Transient	0.99746
DBTMEE:0015615	Osbpl3	71720	1-Cell Transient	0.91206
DBTMEE:0010244	Hpgds	54486	1-Cell Transient	0.99885
DBTMEE:0022185	Vmn1r36	171184	1-Cell Transient	0.99733
DBTMEE:0006676	Elmod3	232089	1-Cell Transient	0.97228
DBTMEE:0001236	4931417E11Rik	66740	1-Cell Transient	0.99745
DBTMEE:0009098	Gm5878	545861	1-Cell Transient	0.99823
DBTMEE:0013707	Nat8	68396	1-Cell Transient	0.99761
DBTMEE:0008065	Gkn3	68888	1-Cell Transient	0.99731
DBTMEE:0012198	Mcm2	17216	1-Cell Transient	0.93971
DBTMEE:0020084	Suclg2	20917	1-Cell Transient	0.95672
DBTMEE:0009232	Gm765	330390	1-Cell Transient	0.99735
DBTMEE:0017397	Rad18	58186	1-Cell Transient	0.99234
DBTMEE:0019849	Srgap3	259302	1-Cell Transient	0.97401
DBTMEE:0012159	Mbd4	17193	1-Cell Transient	0.94052
DBTMEE:0007867	Gapdh	14433	1-Cell Transient	0.97107
DBTMEE:0004808	Clec12b	71183	1-Cell Transient	0.99736
DBTMEE:0011248	Klra3	16634	1-Cell Transient	0.99732
DBTMEE:0012014	Magohb	66441	1-Cell Transient	0.96494
DBTMEE:0010984	Kcnj8	16523	1-Cell Transient	0.99872
DBTMEE:0011287	Kras	16653	1-Cell Transient	0.97421
DBTMEE:0007857	Galp	232836	1-Cell Transient	0.99732
DBTMEE:0008627	Gm16532	100042450	1-Cell Transient	0.9926
DBTMEE:0022230	Vmn1r77	628946	1-Cell Transient	0.99737
DBTMEE:0020104	Sult2a5	434264	1-Cell Transient	0.99738
DBTMEE:0013688	Napa	108124	1-Cell Transient	0.94939
DBTMEE:0006899	Ethe1	66071	1-Cell Transient	0.96278
DBTMEE:0003075	Atp5sl	66349	1-Cell Transient	0.93493
DBTMEE:0011589	Lgals4		1-Cell Transient	0.97714
DBTMEE:0011590	Lgals6		1-Cell Transient	0.97714
DBTMEE:0007997	Ggn	243897	1-Cell Transient	0.96411
DBTMEE:0004494	Ceacam18	72431	1-Cell Transient	0.98301
DBTMEE:0011208	Klk10	69540	1-Cell Transient	0.99747
DBTMEE:0011233	Klk9	101533	1-Cell Transient	0.99756
DBTMEE:0011214	Klk1b1	16623	1-Cell Transient	0.9975
DBTMEE:0010942	Kcnc1	16502	1-Cell Transient	0.99883
DBTMEE:0018816	Siglech	233274	1-Cell Transient	0.99745
DBTMEE:0014977	Olfr293	257906	1-Cell Transient	0.99221
DBTMEE:0022352	Vmn2r78	637896	1-Cell Transient	0.99743
DBTMEE:0009760	Gucy2d	14918	1-Cell Transient	0.99806
DBTMEE:0015294	Olfr677	258355	1-Cell Transient	0.99737
DBTMEE:0006198	Dock1	330662	1-Cell Transient	0.9905
DBTMEE:0007535	Fiz1	23877	1-Cell Transient	0.99814
DBTMEE:0022303	Vmn2r32	22311	1-Cell Transient	0.99883
DBTMEE:0022305	Vmn2r34	100042636	1-Cell Transient	0.99883
DBTMEE:0022321	Vmn2r49	625605	1-Cell Transient	0.99753
DBTMEE:0022328	Vmn2r55	100042499	1-Cell Transient	0.99741
DBTMEE:0004492	Ceacam15	101434	1-Cell Transient	0.99779
DBTMEE:0021995	Vasp	22323	1-Cell Transient	0.97946
DBTMEE:0008944	Gm4763	210155	1-Cell Transient	0.99738
DBTMEE:0009680	Gsk3a	606496	1-Cell Transient	0.97961
DBTMEE:0004167	Ccdc97	52132	1-Cell Transient	0.95832
DBTMEE:0010180	Hnrnpul1	232989	1-Cell Transient	0.93654
DBTMEE:0009889	Haus5	71909	1-Cell Transient	0.94402
DBTMEE:0016670	Ppfia3	76787	1-Cell Transient	0.97104
DBTMEE:0013246	Mrgprb2	243979	1-Cell Transient	0.99742
DBTMEE:0019952	St8sia2	20450	1-Cell Transient	0.98771
DBTMEE:0003517	Blm	12144	1-Cell Transient	0.98189
DBTMEE:0022340	Vmn2r67	620672	1-Cell Transient	0.98658
DBTMEE:0016560	Pold3	67967	1-Cell Transient	0.91353
DBTMEE:0015379	Olfr78		1-Cell Transient	0.99802
DBTMEE:0015195	Olfr560		1-Cell Transient	0.99802
DBTMEE:0006318	Dub2a	384701	1-Cell Transient	0.94157
DBTMEE:0015269	Olfr649	259057	1-Cell Transient	0.99732
DBTMEE:0021329	Trim30b	244183	1-Cell Transient	0.99876
DBTMEE:0015306	Olfr690	56860	1-Cell Transient	0.99769
DBTMEE:0015307	Olfr691	259063	1-Cell Transient	0.99734
DBTMEE:0010254	Hpx	15458	1-Cell Transient	0.97306
DBTMEE:0018157	Rrp8	101867	1-Cell Transient	0.96419
DBTMEE:0020271	Taf10	24075	1-Cell Transient	0.97549
DBTMEE:0019940	St5	76954	1-Cell Transient	0.99311
DBTMEE:0013341	Mrvi1	17540	1-Cell Transient	0.96609
DBTMEE:0003843	Calca	12310	1-Cell Transient	0.96165
DBTMEE:0017002	Prrt2	69017	1-Cell Transient	0.97658
DBTMEE:0013982	Nkx1-2	20231	1-Cell Transient	0.99736
DBTMEE:0004870	Clrn3	212070	1-Cell Transient	0.99735
DBTMEE:0004421	Cdhr5	72040	1-Cell Transient	0.99903
DBTMEE:0013254	Mrgprg	381974	1-Cell Transient	0.99766
DBTMEE:0016952	Proz	66901	1-Cell Transient	0.99736
DBTMEE:0005878	Defa21	66298	1-Cell Transient	0.9973
DBTMEE:0004135	Ccdc70	67929	1-Cell Transient	0.99732
DBTMEE:0013450	Mtnr1a	17773	1-Cell Transient	0.94614
DBTMEE:0002938	Asb5	76294	1-Cell Transient	0.99815
DBTMEE:0014150	Npy1r	18166	1-Cell Transient	0.99742
DBTMEE:0018186	Rtbdn	234542	1-Cell Transient	0.96362
DBTMEE:0015601	Orc6	56452	1-Cell Transient	0.89538
DBTMEE:0010771	Irx6	64379	1-Cell Transient	0.99736
DBTMEE:0013396	Mt4	17752	1-Cell Transient	0.98435
DBTMEE:0004831	Clec4g	75863	1-Cell Transient	0.99749
DBTMEE:0004277	Cd209a	170786	1-Cell Transient	0.99732
DBTMEE:0005894	Defb15	246082	1-Cell Transient	0.99708
DBTMEE:0008032	Gins4	109145	1-Cell Transient	0.9974
DBTMEE:0007483	Fgf20	80857	1-Cell Transient	0.97521
DBTMEE:0006967	F11	109821	1-Cell Transient	0.99737
DBTMEE:0011234	Klkb1	16621	1-Cell Transient	0.99762
DBTMEE:0009970	Helt	234219	1-Cell Transient	0.99734
DBTMEE:0011182	Klhl2	77113	1-Cell Transient	0.979
DBTMEE:0005265	Csgalnact1	234356	1-Cell Transient	0.99825
DBTMEE:0010555	Il15	16168	1-Cell Transient	0.94017
DBTMEE:0003595	Brd7	26992	1-Cell Transient	0.99085
DBTMEE:0004401	Cdh16	12556	1-Cell Transient	0.99737
DBTMEE:0006015	Dhx38	64340	1-Cell Transient	0.99164
DBTMEE:0002172	Adat1	30947	1-Cell Transient	0.98704
DBTMEE:0005801	Dcun1d5	76863	1-Cell Transient	0.99715
DBTMEE:0003543	Bmper	73230	1-Cell Transient	0.99227
DBTMEE:0010971	Kcnj1	56379	1-Cell Transient	0.99763
DBTMEE:0009216	Gm7257	639025	1-Cell Transient	0.99737
DBTMEE:0014818	Olfr145	258310	1-Cell Transient	0.99731
DBTMEE:0021835	Ulk3	71742	1-Cell Transient	0.9197
DBTMEE:0011477	Larp6	67557	1-Cell Transient	0.99737
DBTMEE:0021781	Uchl4	93841	1-Cell Transient	0.99123
DBTMEE:0013597	Myo5c	208943	1-Cell Transient	0.95398
DBTMEE:0011194	Klhl31	244923	1-Cell Transient	0.99759
DBTMEE:0003427	Bckdhb	12040	1-Cell Transient	0.99673
DBTMEE:0023256	Zic4	22774	1-Cell Transient	0.99914
DBTMEE:0016480	Plscr5	100504689	1-Cell Transient	0.99733
DBTMEE:0015760	Panx3	208098	1-Cell Transient	0.99775
DBTMEE:0002530	Ankk1	244859	1-Cell Transient	0.99734
DBTMEE:0000604	2310030G06Rik	66952	1-Cell Transient	0.98791
DBTMEE:0018349	Scaper	244891	1-Cell Transient	0.97072
DBTMEE:0020379	Tbc1d21	74286	1-Cell Transient	0.99734
DBTMEE:0021383	Trip4	56404	1-Cell Transient	0.96115
DBTMEE:0003730	C2cd4a	244911	1-Cell Transient	0.99774
DBTMEE:0001784	AF529169	209743	1-Cell Transient	0.94535
DBTMEE:0013231	Mras	17532	1-Cell Transient	0.98603
DBTMEE:0021701	Ube2a	22209	1-Cell Transient	0.95038
DBTMEE:0019615	Ankrd58	245381	1-Cell Transient	0.99741
DBTMEE:0009618	Gria3	53623	1-Cell Transient	0.99857
DBTMEE:0014397	Ocrl	320634	1-Cell Transient	0.96251
DBTMEE:0020423	Tbx22	245572	1-Cell Transient	0.99812
DBTMEE:0020437	Tceal3	594844	1-Cell Transient	0.99735
DBTMEE:0010584	Il1rapl2	60367	1-Cell Transient	0.99746
DBTMEE:0017707	Rgag1	209540	1-Cell Transient	0.99765
DBTMEE:0007524	Figf	14205	1-Cell Transient	0.99741
DBTMEE:0002927	Asb11	68854	1-Cell Transient	0.99738
DBTMEE:0009019	Gm5168	382275	1-Cell Transient	0.99704
DBTMEE:0013980	Nkrf	77286	1-Cell Transient	0.95336
DBTMEE:0022659	Xlr5a	574438	1-Cell Transient	0.97381
DBTMEE:0005700	DXBay18	574405	1-Cell Transient	0.99258
DBTMEE:0016887	Prkx	19108	1-Cell Transient	0.99836
DBTMEE:0020439	Tceal6	66104	1-Cell Transient	0.99773
DBTMEE:0000151	1700008I05Rik	71841	1-Cell Transient	0.99748
DBTMEE:0020559	Tex13a	67944	1-Cell Transient	0.99738
DBTMEE:0003901	Capn6	12338	1-Cell Transient	0.99911
DBTMEE:0005802	Dcx	13193	1-Cell Transient	0.99453
DBTMEE:0008612	Gm16390	100040937	1-Cell Transient	0.9977
DBTMEE:0017579	Rbmy1a1	19657	1-Cell Transient	0.99751
DBTMEE:0020433	Tcea1	21399	2-Cell Transient	0.82641
DBTMEE:0018159	Rrs1	59014	2-Cell Transient	0.98432
DBTMEE:0016220	Pi15	94227	2-Cell Transient	0.99559
DBTMEE:0006299	Dst	13518	2-Cell Transient	0.96515
DBTMEE:0002830	Arid5a	214855	2-Cell Transient	0.9475
DBTMEE:0004932	Cnnm3	94218	2-Cell Transient	0.95349
DBTMEE:0010586	Il1rl2	107527	2-Cell Transient	0.97438
DBTMEE:0012126	Mars2	212679	2-Cell Transient	0.99364
DBTMEE:0007768	Fzd7	14369	2-Cell Transient	0.9235
DBTMEE:0001956	Abi2	329165	2-Cell Transient	0.94491
DBTMEE:0005177	Creb1	12912	2-Cell Transient	0.9958
DBTMEE:0010504	Igfbp2	16008	2-Cell Transient	0.98471
DBTMEE:0018212	Rufy4	435626	2-Cell Transient	0.96205
DBTMEE:0013165	Mogat1	68393	2-Cell Transient	0.97934
DBTMEE:0021959	Utp14b		2-Cell Transient	0.97652
DBTMEE:0002054	Acsl3		2-Cell Transient	0.97652
DBTMEE:0007374	Fbxo36	66153	2-Cell Transient	0.98639
DBTMEE:0000765	2810459M11Rik	72792	2-Cell Transient	0.998
DBTMEE:0021807	Ugt1a2		2-Cell Transient	0.98539
DBTMEE:0021809	Ugt1a6a		2-Cell Transient	0.98539
DBTMEE:0021810	Ugt1a6b		2-Cell Transient	0.98539
DBTMEE:0021806	Ugt1a10		2-Cell Transient	0.98539
DBTMEE:0021811	Ugt1a7c		2-Cell Transient	0.98539
DBTMEE:0021808	Ugt1a5		2-Cell Transient	0.98539
DBTMEE:0021812	Ugt1a9		2-Cell Transient	0.98539
DBTMEE:0021805	Ugt1a1		2-Cell Transient	0.98539
DBTMEE:0007830	Gal3st2	381334	2-Cell Transient	0.98643
DBTMEE:0019259	Slco6d1	70866	2-Cell Transient	0.96913
DBTMEE:0020906	Tmem185b	226351	2-Cell Transient	0.98613
DBTMEE:0018438	Sctr	319229	2-Cell Transient	0.99818
DBTMEE:0002016	Acmsd	266645	2-Cell Transient	0.92473
DBTMEE:0001307	4933406M09Rik	240755	2-Cell Transient	0.98812
DBTMEE:0011063	Kdm5b	75605	2-Cell Transient	0.95733
DBTMEE:0017209	Ptpn7	320139	2-Cell Transient	0.99741
DBTMEE:0021155	Tnnt2	21956	2-Cell Transient	0.89556
DBTMEE:0022930	Zfp281	226442	2-Cell Transient	0.98148
DBTMEE:0022763	Zbtb41	226470	2-Cell Transient	0.96494
DBTMEE:0002690	Apobec4	71281	2-Cell Transient	0.98438
DBTMEE:0017725	Rgs16	19734	2-Cell Transient	0.97843
DBTMEE:0002567	Ankrd45	73844	2-Cell Transient	0.99477
DBTMEE:0000160	1700009P17Rik	75472	2-Cell Transient	0.98415
DBTMEE:0021894	Usf1	22278	2-Cell Transient	0.99786
DBTMEE:0002454	Refbp2	56009	2-Cell Transient	0.99683
DBTMEE:0010972	Kcnj10	16513	2-Cell Transient	0.93968
DBTMEE:0016245	Pigm	67556	2-Cell Transient	0.97907
DBTMEE:0007204	Fam36a	66359	2-Cell Transient	0.95406
DBTMEE:0021411	Trp53bp2	209456	2-Cell Transient	0.99309
DBTMEE:0003903	Capn8	170725	2-Cell Transient	0.91722
DBTMEE:0005627	D1Pas1	110957	2-Cell Transient	0.9986
DBTMEE:0013849	Nek2	18005	2-Cell Transient	0.97513
DBTMEE:0017611	Rd3	74023	2-Cell Transient	0.99604
DBTMEE:0017185	Ptp4a1	19243	2-Cell Transient	0.98091
DBTMEE:0009033	Gm5415	408191	2-Cell Transient	0.93221
DBTMEE:0008565	Gm15455	433287	2-Cell Transient	0.99761
DBTMEE:0002548	Ankrd23	78321	2-Cell Transient	0.98956
DBTMEE:0012386	Mgat4a	269181	2-Cell Transient	0.96538
DBTMEE:0007766	Fzd5	14367	2-Cell Transient	0.99274
DBTMEE:0002524	Ankar	319695	2-Cell Transient	0.93127
DBTMEE:0021931	Usp37	319651	2-Cell Transient	0.93373
DBTMEE:0005390	Cul3	26554	2-Cell Transient	0.9782
DBTMEE:0018946	Slc19a3	80721	2-Cell Transient	0.9985
DBTMEE:0006179	Dner	227325	2-Cell Transient	0.99955
DBTMEE:0019638	Sp110	109032	2-Cell Transient	0.956
DBTMEE:0001716	A730008H23Rik		2-Cell Transient	0.91609
DBTMEE:0010116	Hjurp		2-Cell Transient	0.91609
DBTMEE:0015648	Otos	260301	2-Cell Transient	0.96907
DBTMEE:0006289	Dsel	319901	2-Cell Transient	0.85207
DBTMEE:0017206	Ptpn4	19258	2-Cell Transient	0.97416
DBTMEE:0020892	Tmem177	66343	2-Cell Transient	0.96501
DBTMEE:0012097	Mapkapk2	17164	2-Cell Transient	0.97636
DBTMEE:0006384	Dyrk3	226419	2-Cell Transient	0.97468
DBTMEE:0015590	Optc	269120	2-Cell Transient	0.96923
DBTMEE:0008947	Gm4788	214403	2-Cell Transient	0.99945
DBTMEE:0017927	Rnf2	19821	2-Cell Transient	0.88165
DBTMEE:0010423	Ier5	15939	2-Cell Transient	0.99539
DBTMEE:0011616	Lhx4	16872	2-Cell Transient	0.99651
DBTMEE:0007101	Fam163a	329274	2-Cell Transient	0.96151
DBTMEE:0021203	Tor3a	30935	2-Cell Transient	0.98918
DBTMEE:0007169	Fam20b	215015	2-Cell Transient	0.99458
DBTMEE:0011183	Klhl20	226541	2-Cell Transient	0.93639
DBTMEE:0020725	Tiprl	226591	2-Cell Transient	0.9906
DBTMEE:0005821	Ddr2	18214	2-Cell Transient	0.94546
DBTMEE:0021826	Uhmk1	16589	2-Cell Transient	0.9656
DBTMEE:0015944	Pcp4l1	66425	2-Cell Transient	0.98012
DBTMEE:0007415	Fcer1g	14127	2-Cell Transient	0.97042
DBTMEE:0018883	Slamf7	75345	2-Cell Transient	0.95333
DBTMEE:0013933	Nhlh1	18071	2-Cell Transient	0.96933
DBTMEE:0010428	Ifi203	15950	2-Cell Transient	0.96911
DBTMEE:0004656	Chml	12663	2-Cell Transient	0.98192
DBTMEE:0016417	Pld5	319455	2-Cell Transient	0.90793
DBTMEE:0020589	Tfb2m	15278	2-Cell Transient	0.97759
DBTMEE:0013184	Mosc1	66112	2-Cell Transient	0.99828
DBTMEE:0010993	Kcnk2	16526	2-Cell Transient	0.86089
DBTMEE:0012376	Mfsd7b	226844	2-Cell Transient	0.97886
DBTMEE:0010911	Katna1	23924	2-Cell Transient	0.99919
DBTMEE:0003453	Bclaf1	72567	2-Cell Transient	0.96558
DBTMEE:0020239	Taar3	493809	2-Cell Transient	0.96912
DBTMEE:0020241	Taar5	215854	2-Cell Transient	0.96907
DBTMEE:0018504	Sec63	140740	2-Cell Transient	0.97508
DBTMEE:0011639	Lims1	110829	2-Cell Transient	0.76457
DBTMEE:0014060	Nodal	18119	2-Cell Transient	0.98953
DBTMEE:0011789	Lrrc20	216011	2-Cell Transient	0.93433
DBTMEE:0013884	Neurog3	11925	2-Cell Transient	0.96912
DBTMEE:0020263	Tacr2	21337	2-Cell Transient	0.94413
DBTMEE:0018210	Rufy2	70432	2-Cell Transient	0.99412
DBTMEE:0006144	Dnajc12	30045	2-Cell Transient	0.99838
DBTMEE:0000688	2610028H24Rik	76964	2-Cell Transient	0.99801
DBTMEE:0022356	Vmn2r81	216144	2-Cell Transient	0.96915
DBTMEE:0009789	Gzmm	16904	2-Cell Transient	0.99339
DBTMEE:0015745	Palm	18483	2-Cell Transient	0.9934
DBTMEE:0004593	Cfd	11537	2-Cell Transient	0.96915
DBTMEE:0002663	Apc2	23805	2-Cell Transient	0.98189
DBTMEE:0007823	Gadd45b	17873	2-Cell Transient	0.99721
DBTMEE:0022773	Zbtb7a	16969	2-Cell Transient	0.96125
DBTMEE:0020428	Tbxa2r	21390	2-Cell Transient	0.99291
DBTMEE:0000558	2210404O07Rik	72273	2-Cell Transient	0.97275
DBTMEE:0020479	Tcp11l2	216198	2-Cell Transient	0.95226
DBTMEE:0017811	Ric8b	237422	2-Cell Transient	0.99949
DBTMEE:0002949	Ascl4	67341	2-Cell Transient	0.97758
DBTMEE:0021938	Usp44	327799	2-Cell Transient	0.98622
DBTMEE:0021725	Ube2n	93765	2-Cell Transient	0.84412
DBTMEE:0007847	Galnt4	14426	2-Cell Transient	0.98886
DBTMEE:0022857	Zfc3h1	216345	2-Cell Transient	0.95842
DBTMEE:0003211	B4galnt1	14421	2-Cell Transient	0.9556
DBTMEE:0017621	Rdh19	216453	2-Cell Transient	0.99675
DBTMEE:0003343	BC089597	216454	2-Cell Transient	0.98754
DBTMEE:0002698	Apof	103161	2-Cell Transient	0.9932
DBTMEE:0013123	Mmp19	58223	2-Cell Transient	0.99377
DBTMEE:0007104	Fam164b	75122	2-Cell Transient	0.99046
DBTMEE:0019101	Slc35d3	76157	2-Cell Transient	0.96914
DBTMEE:0020409	Tbpl1	237336	2-Cell Transient	0.98583
DBTMEE:0007199	Fam26d	270711	2-Cell Transient	0.96938
DBTMEE:0021850	Unc5b	107449	2-Cell Transient	0.95548
DBTMEE:0019189	Slc5a4b	64454	2-Cell Transient	0.9712
DBTMEE:0005020	Col6a1	12833	2-Cell Transient	0.98994
DBTMEE:0004997	Col18a1	12822	2-Cell Transient	0.94067
DBTMEE:0002170	Adarb1	110532	2-Cell Transient	0.96389
DBTMEE:0020652	Theg	21830	2-Cell Transient	0.99806
DBTMEE:0013073	Mknk2	17347	2-Cell Transient	0.95775
DBTMEE:0002987	Atcay	16467	2-Cell Transient	0.98726
DBTMEE:0020730	Tjp3	27375	2-Cell Transient	0.99498
DBTMEE:0009359	Gna15	14676	2-Cell Transient	0.98493
DBTMEE:0016822	Prdm4	72843	2-Cell Transient	0.97407
DBTMEE:0017358	Rab3ip	216363	2-Cell Transient	0.95825
DBTMEE:0011953	Lyz1	17110	2-Cell Transient	0.99527
DBTMEE:0012234	Mdm2	17246	2-Cell Transient	0.97451
DBTMEE:0019104	Slc35e3	215436	2-Cell Transient	0.99556
DBTMEE:0009967	Helb	117599	2-Cell Transient	0.99106
DBTMEE:0016297	Pip4k2c	117150	2-Cell Transient	0.95302
DBTMEE:0009524	Gpr182	11536	2-Cell Transient	0.96911
DBTMEE:0010295	Hsd17b6	27400	2-Cell Transient	0.99454
DBTMEE:0013172	Morc2a	74522	2-Cell Transient	0.99963
DBTMEE:0007829	Gal3st1	53897	2-Cell Transient	0.97446
DBTMEE:0001890	Abca13	268379	2-Cell Transient	0.72701
DBTMEE:0018646	Sertad2	58172	2-Cell Transient	0.98934
DBTMEE:0023315	Zrsr1	22183	2-Cell Transient	0.98763
DBTMEE:0004155	Ccdc88a	108686	2-Cell Transient	0.89838
DBTMEE:0000308	1700034F02Rik	73324	2-Cell Transient	0.97494
DBTMEE:0019523	Snrnp25	78372	2-Cell Transient	0.94585
DBTMEE:0021767	Ubtd2	327900	2-Cell Transient	0.96327
DBTMEE:0019287	Slu7	193116	2-Cell Transient	0.99338
DBTMEE:0004219	Ccnjl	380694	2-Cell Transient	0.99749
DBTMEE:0017263	Pwwp2a	70802	2-Cell Transient	0.99424
DBTMEE:0019629	Sox30	214105	2-Cell Transient	0.98149
DBTMEE:0002115	Adam19	11492	2-Cell Transient	0.9542
DBTMEE:0009894	Havcr2	171285	2-Cell Transient	0.97924
DBTMEE:0008322	Gm12169	210535	2-Cell Transient	0.99315
DBTMEE:0008323	Gm12171	675689	2-Cell Transient	0.96907
DBTMEE:0021369	Trim7	94089	2-Cell Transient	0.9955
DBTMEE:0017466	Rapgef6	192786	2-Cell Transient	0.88786
DBTMEE:0009616	Gria1	14799	2-Cell Transient	0.96554
DBTMEE:0018303	Sap30l	50724	2-Cell Transient	0.96087
DBTMEE:0004942	Cnot8	69125	2-Cell Transient	0.95592
DBTMEE:0008329	Gm12250	631323	2-Cell Transient	0.9964
DBTMEE:0014936	Olfr225	257886	2-Cell Transient	0.99611
DBTMEE:0013580	Myo15	17910	2-Cell Transient	0.95445
DBTMEE:0019331	Smcr8	237782	2-Cell Transient	0.983
DBTMEE:0012052	Map2k3	26397	2-Cell Transient	0.98602
DBTMEE:0000620	2310047M10Rik	71923	2-Cell Transient	0.98874
DBTMEE:0002433	Alox12b	11686	2-Cell Transient	0.97661
DBTMEE:0018319	Sat2	69215	2-Cell Transient	0.99014
DBTMEE:0001133	4930544D05Rik	668433	2-Cell Transient	0.96907
DBTMEE:0017378	Rabep1	54189	2-Cell Transient	0.88998
DBTMEE:0001173	4930563E22Rik	75304	2-Cell Transient	0.98337
DBTMEE:0019678	Spata22	380709	2-Cell Transient	0.82572
DBTMEE:0019336	Smg6	103677	2-Cell Transient	0.96654
DBTMEE:0019151	Slc43a2	215113	2-Cell Transient	0.99626
DBTMEE:0001946	Abhd15	67477	2-Cell Transient	0.96531
DBTMEE:0000708	2610507B11Rik	72503	2-Cell Transient	0.94831
DBTMEE:0019660	Spag5	54141	2-Cell Transient	0.98906
DBTMEE:0002985	Atad5	237877	2-Cell Transient	0.94327
DBTMEE:0004442	Cdk5r1	12569	2-Cell Transient	0.99933
DBTMEE:0004196	Ccl7	20306	2-Cell Transient	0.96907
DBTMEE:0000229	1700020L24Rik	66330	2-Cell Transient	0.96915
DBTMEE:0020275	Taf15	70439	2-Cell Transient	0.99207
DBTMEE:0018853	Fam33a	66140	2-Cell Transient	0.96511
DBTMEE:0019877	Srsf1	110809	2-Cell Transient	0.98578
DBTMEE:0000432	1700106J16Rik	74297	2-Cell Transient	0.96908
DBTMEE:0004987	Coil	12812	2-Cell Transient	0.96169
DBTMEE:0004999	Col1a1	12842	2-Cell Transient	0.72327
DBTMEE:0016207	Phospho1	237928	2-Cell Transient	0.93427
DBTMEE:0008033	Gip	14607	2-Cell Transient	0.99641
DBTMEE:0009668	Gsdma3	450219	2-Cell Transient	0.97396
DBTMEE:0021615	Tubg1	103733	2-Cell Transient	0.99477
DBTMEE:0002619	Aoc2	237940	2-Cell Transient	0.9968
DBTMEE:0002620	Aoc3	11754	2-Cell Transient	0.99869
DBTMEE:0007783	G6pc	14377	2-Cell Transient	0.96792
DBTMEE:0010435	Ifi35	70110	2-Cell Transient	0.96057
DBTMEE:0006019	Dhx8	217207	2-Cell Transient	0.95368
DBTMEE:0007763	Fzd2	57265	2-Cell Transient	0.8996
DBTMEE:0008571	Gm1564	268491	2-Cell Transient	0.99434
DBTMEE:0009997	Hexim1	192231	2-Cell Transient	0.99901
DBTMEE:0020744	Tlk2	24086	2-Cell Transient	0.99574
DBTMEE:0004111	Ccdc46	76380	2-Cell Transient	0.98174
DBTMEE:0010979	Kcnj2	16518	2-Cell Transient	0.98188
DBTMEE:0015645	Otop2	237987	2-Cell Transient	0.96912
DBTMEE:0020792	Tmc8	217356	2-Cell Transient	0.96514
DBTMEE:0001469	6030468B19Rik	77727	2-Cell Transient	0.9954
DBTMEE:0020194	Syngr2	20973	2-Cell Transient	0.96694
DBTMEE:0004049	Ccdc137	67291	2-Cell Transient	0.95567
DBTMEE:0012315	Metrnl	210029	2-Cell Transient	0.90492
DBTMEE:0018681	Sfi1	78887	2-Cell Transient	0.97863
DBTMEE:0004066	Ccdc157	216516	2-Cell Transient	0.86329
DBTMEE:0013445	Mtmr3	74302	2-Cell Transient	0.99072
DBTMEE:0006708	Emid1	140703	2-Cell Transient	0.98803
DBTMEE:0023309	Zpbp	53604	2-Cell Transient	0.9252
DBTMEE:0005809	Ddc	13195	2-Cell Transient	0.97282
DBTMEE:0006893	Etaa1	68145	2-Cell Transient	0.99287
DBTMEE:0018950	Slc1a4	55963	2-Cell Transient	0.95703
DBTMEE:0006539	Efcab9	69306	2-Cell Transient	0.9617
DBTMEE:0017445	Ranbp17	66011	2-Cell Transient	0.91145
DBTMEE:0007801	Gabra1	14394	2-Cell Transient	0.98562
DBTMEE:0021528	Ttc1	66827	2-Cell Transient	0.96746
DBTMEE:0013960	Nipal4	214112	2-Cell Transient	0.99354
DBTMEE:0018493	Sec24a	77371	2-Cell Transient	0.99948
DBTMEE:0021702	Ube2b	22210	2-Cell Transient	0.92652
DBTMEE:0019612	Ankrd43	237761	2-Cell Transient	0.9849
DBTMEE:0018968	Slc22a21	56517	2-Cell Transient	0.99603
DBTMEE:0019666	Sparc	20692	2-Cell Transient	0.99785
DBTMEE:0023098	Zfp672	319475	2-Cell Transient	0.99611
DBTMEE:0014934	Olfr223	258421	2-Cell Transient	0.96915
DBTMEE:0018792	Shmt1	20425	2-Cell Transient	0.99137
DBTMEE:0020827	Tmem11	216821	2-Cell Transient	0.93383
DBTMEE:0014408	Odf4	252868	2-Cell Transient	0.99741
DBTMEE:0017452	Rangrf	57785	2-Cell Transient	0.98364
DBTMEE:0005442	Cyb5d1	327951	2-Cell Transient	0.99777
DBTMEE:0019728	Spem1	74288	2-Cell Transient	0.96916
DBTMEE:0019064	Slc2a4	20528	2-Cell Transient	0.99362
DBTMEE:0006690	Rai12	54351	2-Cell Transient	0.99526
DBTMEE:0002434	Alox12e	11685	2-Cell Transient	0.99656
DBTMEE:0005418	Cxcl16	66102	2-Cell Transient	0.99133
DBTMEE:0006010	Dhx33	216877	2-Cell Transient	0.99276
DBTMEE:0001473	6330403K07Rik	103712	2-Cell Transient	0.95616
DBTMEE:0012270	Med31	67279	2-Cell Transient	0.95895
DBTMEE:0020527	Tekt1	21689	2-Cell Transient	0.96151
DBTMEE:0019774	Spns2	216892	2-Cell Transient	0.99396
DBTMEE:0021413	Trp53i13	216964	2-Cell Transient	0.98367
DBTMEE:0005212	Crlf3	54394	2-Cell Transient	0.97013
DBTMEE:0001437	5730455P16Rik	70591	2-Cell Transient	0.98672
DBTMEE:0013133	Mmp28	118453	2-Cell Transient	0.99779
DBTMEE:0004194	Ccl5	20304	2-Cell Transient	0.96908
DBTMEE:0008272	Gm11437	628813	2-Cell Transient	0.99328
DBTMEE:0013259	Mrm1	217038	2-Cell Transient	0.97664
DBTMEE:0021926	Usp32	237898	2-Cell Transient	0.96624
DBTMEE:0012251	Med13	327987	2-Cell Transient	0.9653
DBTMEE:0005977	Dgke	56077	2-Cell Transient	0.99623
DBTMEE:0010122	Hlf	217082	2-Cell Transient	0.99786
DBTMEE:0011898	Luc7l3	67684	2-Cell Transient	0.975
DBTMEE:0014349	Nxph3	104079	2-Cell Transient	0.99797
DBTMEE:0001957	Abi3	66610	2-Cell Transient	0.98426
DBTMEE:0003212	B4galnt2	14422	2-Cell Transient	0.99369
DBTMEE:0016483	Plxdc1	72324	2-Cell Transient	0.99062
DBTMEE:0011313	Krt28	70843	2-Cell Transient	0.96444
DBTMEE:0008290	Gm11569		2-Cell Transient	0.9721
DBTMEE:0008282	Gm11554		2-Cell Transient	0.9721
DBTMEE:0011379	Krtap4-13		2-Cell Transient	0.9721
DBTMEE:0011304	Krt19	16669	2-Cell Transient	0.97092
DBTMEE:0011175	Klhl11	217194	2-Cell Transient	0.99675
DBTMEE:0022975	Zfp385c	278304	2-Cell Transient	0.99183
DBTMEE:0017233	Ptrf	19285	2-Cell Transient	0.99328
DBTMEE:0003467	Becn1	56208	2-Cell Transient	0.83731
DBTMEE:0019168	Slc4a1	20533	2-Cell Transient	0.97016
DBTMEE:0007118	Fam171a2	217219	2-Cell Transient	0.98919
DBTMEE:0003703	C1ql1	23829	2-Cell Transient	0.99531
DBTMEE:0012062	Map3k14	53859	2-Cell Transient	0.97675
DBTMEE:0022616	Wnt9b	22412	2-Cell Transient	0.99895
DBTMEE:0016318	Pitpnc1	71795	2-Cell Transient	0.98888
DBTMEE:0003826	Cacng5	140723	2-Cell Transient	0.93219
DBTMEE:0019132	Slc39a11	69806	2-Cell Transient	0.99112
DBTMEE:0010157	Hn1	15374	2-Cell Transient	0.9446
DBTMEE:0021845	Unc13d	70450	2-Cell Transient	0.97997
DBTMEE:0007637	Foxj1	15223	2-Cell Transient	0.8824
DBTMEE:0017910	Rnf157	217340	2-Cell Transient	0.96233
DBTMEE:0016974	Prpsap1	67763	2-Cell Transient	0.99068
DBTMEE:0021726	Ube2o	217342	2-Cell Transient	0.99253
DBTMEE:0010877	Jmjd6	107817	2-Cell Transient	0.97837
DBTMEE:0020637	Tha1	71776	2-Cell Transient	0.96608
DBTMEE:0021930	Usp36	72344	2-Cell Transient	0.99047
DBTMEE:0003347	BC100451	58251	2-Cell Transient	0.9357
DBTMEE:0018724	Sgsh	27029	2-Cell Transient	0.97967
DBTMEE:0011984	Mafg	17134	2-Cell Transient	0.8493
DBTMEE:0013523	Myadml2	68515	2-Cell Transient	0.9915
DBTMEE:0004119	Ccdc57	71276	2-Cell Transient	0.94112
DBTMEE:0003256	BC017643	217370	2-Cell Transient	0.97877
DBTMEE:0011114	Kif3c	16570	2-Cell Transient	0.98454
DBTMEE:0002978	Asxl2	75302	2-Cell Transient	0.9572
DBTMEE:0006306	Dtnb	13528	2-Cell Transient	0.94883
DBTMEE:0016609	Pomc	18976	2-Cell Transient	0.98687
DBTMEE:0003339	BC068281	238037	2-Cell Transient	0.95417
DBTMEE:0019326	Smc6	67241	2-Cell Transient	0.87342
DBTMEE:0013676	Nampt	59027	2-Cell Transient	0.9561
DBTMEE:0016971	Prps1l1	75456	2-Cell Transient	0.93967
DBTMEE:0016537	Pnpla8	67452	2-Cell Transient	0.93659
DBTMEE:0007773	G2e3	217558	2-Cell Transient	0.99924
DBTMEE:0000038	1110008L16Rik	66132	2-Cell Transient	0.94078
DBTMEE:0003609	Brms1l	52592	2-Cell Transient	0.99573
DBTMEE:0016972	Prps1l3		2-Cell Transient	0.98847
DBTMEE:0012434	Mipol1		2-Cell Transient	0.98847
DBTMEE:0019912	Sstr1	20605	2-Cell Transient	0.96939
DBTMEE:0012384	Mgat2	217664	2-Cell Transient	0.99481
DBTMEE:0002751	Arf6	11845	2-Cell Transient	0.99721
DBTMEE:0021092	Tmx1	72736	2-Cell Transient	0.97218
DBTMEE:0002828	Arid4a	238247	2-Cell Transient	0.9411
DBTMEE:0016692	Ppm1a	19042	2-Cell Transient	0.9905
DBTMEE:0005745	Dbpht2	386753	2-Cell Transient	0.96915
DBTMEE:0010324	Hspa2	15512	2-Cell Transient	0.94127
DBTMEE:0019143	Slc39a9	328133	2-Cell Transient	0.94868
DBTMEE:0000648	2410016O06Rik	71952	2-Cell Transient	0.98009
DBTMEE:0021992	Vash1	238328	2-Cell Transient	0.99348
DBTMEE:0016777	Ppp4r4	74521	2-Cell Transient	0.96524
DBTMEE:0018594	Serpina3f		2-Cell Transient	0.96918
DBTMEE:0018595	Serpina3g		2-Cell Transient	0.96918
DBTMEE:0003463	Bdkrb2	12062	2-Cell Transient	0.99824
DBTMEE:0010014	Hhipl1	214305	2-Cell Transient	0.97623
DBTMEE:0006713	Eml1	68519	2-Cell Transient	0.99327
DBTMEE:0019032	Slc25a47	104910	2-Cell Transient	0.98579
DBTMEE:0006031	Dio3	107585	2-Cell Transient	0.95486
DBTMEE:0017606	Rcor1	217864	2-Cell Transient	0.97499
DBTMEE:0003093	Atp6v1c2	68775	2-Cell Transient	0.9662
DBTMEE:0010814	Itgb1bp1	16413	2-Cell Transient	0.98739
DBTMEE:0005578	Cys1	12879	2-Cell Transient	0.96352
DBTMEE:0019618	Sox11	20666	2-Cell Transient	0.92417
DBTMEE:0006140	Dnajb9	27362	2-Cell Transient	0.95236
DBTMEE:0013983	Nkx2-1	21869	2-Cell Transient	0.9926
DBTMEE:0018011	Rpl10l	238217	2-Cell Transient	0.96883
DBTMEE:0016767	Ppp2r5e	26932	2-Cell Transient	0.99516
DBTMEE:0004084	Gm1568	380768	2-Cell Transient	0.99024
DBTMEE:0020199	Synj2bp	24071	2-Cell Transient	0.98799
DBTMEE:0002120	Adam21	56622	2-Cell Transient	0.99916
DBTMEE:0020813	Tmed8	382620	2-Cell Transient	0.98707
DBTMEE:0014206	Nrp		2-Cell Transient	0.99791
DBTMEE:0002421	Alkbh1		2-Cell Transient	0.99791
DBTMEE:0008610	Gm16381	100042786	2-Cell Transient	0.9691
DBTMEE:0000221	1700019M22Rik	69423	2-Cell Transient	0.99663
DBTMEE:0011599	Lgmn	19141	2-Cell Transient	0.92496
DBTMEE:0003639	Btbd7	238386	2-Cell Transient	0.97899
DBTMEE:0005932	Degs2	70059	2-Cell Transient	0.94597
DBTMEE:0003600	Brf1	72308	2-Cell Transient	0.97749
DBTMEE:0007960	Gdi2	14569	2-Cell Transient	0.95788
DBTMEE:0002929	Asb13	142688	2-Cell Transient	0.99011
DBTMEE:0002829	Arid4b	94246	2-Cell Transient	0.98538
DBTMEE:0018690	Sfrp4	20379	2-Cell Transient	0.94829
DBTMEE:0010751	Irf4	16364	2-Cell Transient	0.94646
DBTMEE:0001335	4933417A18Rik	66761	2-Cell Transient	0.96909
DBTMEE:0016745	Ppp1r3g	76487	2-Cell Transient	0.98124
DBTMEE:0016159	Phactr1	218194	2-Cell Transient	0.94733
DBTMEE:0010406	Id4	15904	2-Cell Transient	0.9919
DBTMEE:0000839	4732471D19Rik	319719	2-Cell Transient	0.99237
DBTMEE:0022953	Zfp346	26919	2-Cell Transient	0.99508
DBTMEE:0022965	Zfp369	170936	2-Cell Transient	0.98944
DBTMEE:0012247	Med10	28077	2-Cell Transient	0.9924
DBTMEE:0010769	Irx4	50916	2-Cell Transient	0.96922
DBTMEE:0006829	Erap1	80898	2-Cell Transient	0.97696
DBTMEE:0019696	Spata9	75571	2-Cell Transient	0.96973
DBTMEE:0011949	Lysmd3	80289	2-Cell Transient	0.94578
DBTMEE:0018579	Serinc5	218442	2-Cell Transient	0.96318
DBTMEE:0020291	Taf9	108143	2-Cell Transient	0.9989
DBTMEE:0004039	Ccdc125	76041	2-Cell Transient	0.97906
DBTMEE:0018729	Sgtb	218544	2-Cell Transient	0.97578
DBTMEE:0002158	Adamts6	108154	2-Cell Transient	0.86304
DBTMEE:0005950	Depdc1b	218581	2-Cell Transient	0.99572
DBTMEE:0009590	Gpx5	14780	2-Cell Transient	0.90774
DBTMEE:0013973	Nkapl	66707	2-Cell Transient	0.95944
DBTMEE:0019630	Sox4	20677	2-Cell Transient	0.99929
DBTMEE:0005933	Dek	110052	2-Cell Transient	0.85858
DBTMEE:0006212	Dok3	27261	2-Cell Transient	0.96049
DBTMEE:0005335	Ctla2b	13025	2-Cell Transient	0.96907
DBTMEE:0005368	Ctsl	13039	2-Cell Transient	0.96198
DBTMEE:0023186	Zfp874b	408067	2-Cell Transient	0.98515
DBTMEE:0019838	Srd5a1	78925	2-Cell Transient	0.99834
DBTMEE:0019203	Slc6a19	74338	2-Cell Transient	0.96909
DBTMEE:0003077	Atp6ap1l	435376	2-Cell Transient	0.98289
DBTMEE:0019829	Spz1	79401	2-Cell Transient	0.99902
DBTMEE:0006973	F2r	14062	2-Cell Transient	0.99023
DBTMEE:0002525	Ankdd1b	271144	2-Cell Transient	0.95619
DBTMEE:0000254	1700024P04Rik	69382	2-Cell Transient	0.96908
DBTMEE:0003943	Cartpt	27220	2-Cell Transient	0.96914
DBTMEE:0017396	Rad17	19356	2-Cell Transient	0.9803
DBTMEE:0009448	Gpbp1	73274	2-Cell Transient	0.92463
DBTMEE:0007709	Fst	14313	2-Cell Transient	0.92871
DBTMEE:0010798	Itga2	16398	2-Cell Transient	0.96922
DBTMEE:0005683	D830030K20Rik	320333	2-Cell Transient	0.96914
DBTMEE:0001953	Abhd6	66082	2-Cell Transient	0.98929
DBTMEE:0013947	Nid2	18074	2-Cell Transient	0.99321
DBTMEE:0002749	Arf4	11843	2-Cell Transient	0.95068
DBTMEE:0018516	Selk	80795	2-Cell Transient	0.97026
DBTMEE:0006457	Eaf1	74427	2-Cell Transient	0.96158
DBTMEE:0007853	Galntl2	78754	2-Cell Transient	0.96913
DBTMEE:0000484	1810011H11Rik	69069	2-Cell Transient	0.96911
DBTMEE:0007950	Gdf10	14560	2-Cell Transient	0.96914
DBTMEE:0013139	Mmrn2	105450	2-Cell Transient	0.95446
DBTMEE:0006361	Dydc1	69496	2-Cell Transient	0.99062
DBTMEE:0012163	Mbl1	17194	2-Cell Transient	0.91592
DBTMEE:0002505	Ang3		2-Cell Transient	0.96912
DBTMEE:0002507	Ang5		2-Cell Transient	0.96912
DBTMEE:0019586	Socs4	67296	2-Cell Transient	0.96098
DBTMEE:0021208	Tox4	268741	2-Cell Transient	0.96798
DBTMEE:0015709	Pabpn1	54196	2-Cell Transient	0.8412
DBTMEE:0011884	Ltb4r1	16995	2-Cell Transient	0.99429
DBTMEE:0010489	Ift88	21821	2-Cell Transient	0.96266
DBTMEE:0005359	Ctsb	13030	2-Cell Transient	0.94271
DBTMEE:0004878	Clu	12759	2-Cell Transient	0.96572
DBTMEE:0011046	Kctd9	105440	2-Cell Transient	0.97057
DBTMEE:0016218	Phyhip	105653	2-Cell Transient	0.92849
DBTMEE:0011723	Lpar6	67168	2-Cell Transient	0.99865
DBTMEE:0010350	Htr2a	15558	2-Cell Transient	0.92991
DBTMEE:0015850	Pcdh17	219228	2-Cell Transient	0.99736
DBTMEE:0021353	Trim52	212085	2-Cell Transient	0.98815
DBTMEE:0019278	Slitrk5	75409	2-Cell Transient	0.96941
DBTMEE:0009455	Gpc6	23888	2-Cell Transient	0.96938
DBTMEE:0017458	Rap2a	76108	2-Cell Transient	0.97046
DBTMEE:0021534	Ttc18	76670	2-Cell Transient	0.96899
DBTMEE:0023288	Zmynd17	74843	2-Cell Transient	0.76869
DBTMEE:0015979	Pde12	211948	2-Cell Transient	0.9802
DBTMEE:0004130	Ccdc66	320234	2-Cell Transient	0.98077
DBTMEE:0016869	Prkcd	18753	2-Cell Transient	0.96015
DBTMEE:0009576	Gprin2	432839	2-Cell Transient	0.96923
DBTMEE:0015584	Opn4	30044	2-Cell Transient	0.96932
DBTMEE:0004418	Cdhr1	170677	2-Cell Transient	0.99488
DBTMEE:0004203	Ccnb1ip1	239083	2-Cell Transient	0.97075
DBTMEE:0001235	4931414P19Rik	74359	2-Cell Transient	0.95561
DBTMEE:0016743	Ppp1r3e	105651	2-Cell Transient	0.96796
DBTMEE:0017837	Ripk3	56532	2-Cell Transient	0.9559
DBTMEE:0009193	Gm6904	628693	2-Cell Transient	0.96911
DBTMEE:0009194	Gm6907	628705	2-Cell Transient	0.97014
DBTMEE:0018666	Setdb2	239122	2-Cell Transient	0.99415
DBTMEE:0021115	Tnfrsf19	29820	2-Cell Transient	0.99363
DBTMEE:0005924	Defb48	432867	2-Cell Transient	0.93239
DBTMEE:0018350	Scara3	219151	2-Cell Transient	0.95369
DBTMEE:0007480	Fgf17	14171	2-Cell Transient	0.97363
DBTMEE:0009722	Gtf2f2	68705	2-Cell Transient	0.99677
DBTMEE:0007183	AU021034	219170	2-Cell Transient	0.96918
DBTMEE:0006024	Diap3	56419	2-Cell Transient	0.89786
DBTMEE:0015853	Pcdh20	219257	2-Cell Transient	0.99814
DBTMEE:0011028	Kctd12	239217	2-Cell Transient	0.98728
DBTMEE:0007349	Fbxl3	50789	2-Cell Transient	0.96505
DBTMEE:0007961	Gdnf	14573	2-Cell Transient	0.99383
DBTMEE:0011681	Lmbrd2	320506	2-Cell Transient	0.9372
DBTMEE:0003910	Capsl	75568	2-Cell Transient	0.98481
DBTMEE:0013442	Mtmr12	268783	2-Cell Transient	0.98741
DBTMEE:0012143	Matn2	17181	2-Cell Transient	0.99771
DBTMEE:0009613	Grhl2	252973	2-Cell Transient	0.96236
DBTMEE:0001878	Aard	239435	2-Cell Transient	0.96341
DBTMEE:0019830	Sqle	20775	2-Cell Transient	0.9961
DBTMEE:0009675	Gsdmd	69146	2-Cell Transient	0.94431
DBTMEE:0023076	Zfp623	78834	2-Cell Transient	0.9898
DBTMEE:0023112	Zfp707	69020	2-Cell Transient	0.99835
DBTMEE:0012084	Mapk15	332110	2-Cell Transient	0.97375
DBTMEE:0009583	Gpt	76282	2-Cell Transient	0.95112
DBTMEE:0023108	Zfp7	223669	2-Cell Transient	0.99559
DBTMEE:0002700	Apol10a	245282	2-Cell Transient	0.96464
DBTMEE:0012410	Micall1	27008	2-Cell Transient	0.99177
DBTMEE:0016587	Polr2f	69833	2-Cell Transient	0.92991
DBTMEE:0004005	Cby1	73739	2-Cell Transient	0.97338
DBTMEE:0020252	Tab1	66513	2-Cell Transient	0.95898
DBTMEE:0020524	Tef	21685	2-Cell Transient	0.99642
DBTMEE:0012288	Mei1	74369	2-Cell Transient	0.96089
DBTMEE:0004046	Ccdc134	76457	2-Cell Transient	0.98232
DBTMEE:0005508	Cyp2d12	380997	2-Cell Transient	0.96907
DBTMEE:0002793	Arhgap8	73167	2-Cell Transient	0.9787
DBTMEE:0021871	Upk3a	22270	2-Cell Transient	0.97917
DBTMEE:0007046	Fam118a	73225	2-Cell Transient	0.97227
DBTMEE:0022739	Zbed4	223773	2-Cell Transient	0.93984
DBTMEE:0013191	Mov10l1	83456	2-Cell Transient	0.97895
DBTMEE:0011169	Klhdc7b	546648	2-Cell Transient	0.96916
DBTMEE:0014964	Olfr279	258502	2-Cell Transient	0.99005
DBTMEE:0000924	4930415O20Rik	73863	2-Cell Transient	0.98402
DBTMEE:0009457	Gpd1	14555	2-Cell Transient	0.99417
DBTMEE:0002100	Acvrl1	11482	2-Cell Transient	0.96837
DBTMEE:0010220	Hoxc12	15421	2-Cell Transient	0.96914
DBTMEE:0010222	Hoxc4	15423	2-Cell Transient	0.93792
DBTMEE:0003934	Card6	239319	2-Cell Transient	0.9621
DBTMEE:0003390	Basp1	70350	2-Cell Transient	0.9896
DBTMEE:0011765	Lrp12	239393	2-Cell Transient	0.99361
DBTMEE:0002982	Atad2	70472	2-Cell Transient	0.98054
DBTMEE:0007371	Fbxo32	67731	2-Cell Transient	0.99023
DBTMEE:0011919	Ly6k	76486	2-Cell Transient	0.96913
DBTMEE:0000539	2010109I03Rik	67038	2-Cell Transient	0.96913
DBTMEE:0015792	Parp10	671535	2-Cell Transient	0.99663
DBTMEE:0003672	C030006K11Rik		2-Cell Transient	0.98985
DBTMEE:0011791	Lrrc24		2-Cell Transient	0.98985
DBTMEE:0023085	Zfp647	239546	2-Cell Transient	0.98312
DBTMEE:0002705	Apol7a	75761	2-Cell Transient	0.98622
DBTMEE:0002706	Apol7b	278679	2-Cell Transient	0.9998
DBTMEE:0011586	Lgals2	107753	2-Cell Transient	0.9889
DBTMEE:0018929	Slc16a8	57274	2-Cell Transient	0.9691
DBTMEE:0004003	Cbx7	52609	2-Cell Transient	0.98517
DBTMEE:0006138	Dnajb7	57755	2-Cell Transient	0.96912
DBTMEE:0016603	Polr3h	78929	2-Cell Transient	0.99906
DBTMEE:0001683	A4galt	239559	2-Cell Transient	0.97694
DBTMEE:0016184	Phf21b	271305	2-Cell Transient	0.99015
DBTMEE:0003591	Brd1	223770	2-Cell Transient	0.84493
DBTMEE:0014405	Odf3b	70113	2-Cell Transient	0.99236
DBTMEE:0018338	Scaf11	72193	2-Cell Transient	0.96803
DBTMEE:0011679	Lmbr1l	74775	2-Cell Transient	0.99045
DBTMEE:0013743	Nckap5l	380969	2-Cell Transient	0.98337
DBTMEE:0017394	Racgap1	26934	2-Cell Transient	0.95037
DBTMEE:0022919	Zfp263	74120	2-Cell Transient	0.95564
DBTMEE:0021751	Ubn1	170644	2-Cell Transient	0.89439
DBTMEE:0000489	1810013L24Rik	69053	2-Cell Transient	0.90306
DBTMEE:0002998	Atf7ip2	75329	2-Cell Transient	0.99282
DBTMEE:0019414	Snn	20621	2-Cell Transient	0.96027
DBTMEE:0019568	Rundc2a	74478	2-Cell Transient	0.94156
DBTMEE:0022695	Ydjc	69101	2-Cell Transient	0.95473
DBTMEE:0017819	Rimbp3	239731	2-Cell Transient	0.99361
DBTMEE:0010022	Hic2	58180	2-Cell Transient	0.98173
DBTMEE:0005209	Crkl	12929	2-Cell Transient	0.98778
DBTMEE:0011185	Klhl22	224023	2-Cell Transient	0.9969
DBTMEE:0011187	Klhl24	75785	2-Cell Transient	0.92917
DBTMEE:0007212	Fam43a	224093	2-Cell Transient	0.99534
DBTMEE:0016259	Pigz	239827	2-Cell Transient	0.99761
DBTMEE:0013731	Ncbp2	68092	2-Cell Transient	0.99325
DBTMEE:0009966	Heg1	77446	2-Cell Transient	0.94891
DBTMEE:0013469	Muc13	17063	2-Cell Transient	0.99482
DBTMEE:0022520	Wdr5b	69544	2-Cell Transient	0.9513
DBTMEE:0009050	Gm5483	433016	2-Cell Transient	0.96909
DBTMEE:0003007	Atg3	67841	2-Cell Transient	0.95651
DBTMEE:0013171	Morc1	17450	2-Cell Transient	0.95424
DBTMEE:0004320	Cd47	16423	2-Cell Transient	0.97764
DBTMEE:0012426	Mina	67014	2-Cell Transient	0.92604
DBTMEE:0010463	Ifnar1	15975	2-Cell Transient	0.87841
DBTMEE:0019187	Slc5a3		2-Cell Transient	0.95625
DBTMEE:0013335	Mrps6		2-Cell Transient	0.95625
DBTMEE:0021547	Ttc3	22129	2-Cell Transient	0.76449
DBTMEE:0022618	Wrb	71446	2-Cell Transient	0.94886
DBTMEE:0007018	Fam100a	207740	2-Cell Transient	0.96228
DBTMEE:0000707	2610318N02Rik	70458	2-Cell Transient	0.99932
DBTMEE:0004031	Ccdc116	76872	2-Cell Transient	0.99941
DBTMEE:0019223	Slc7a4	224022	2-Cell Transient	0.98359
DBTMEE:0009665	Gsc2	195333	2-Cell Transient	0.96913
DBTMEE:0005615	D16H22S680E	27883	2-Cell Transient	0.97852
DBTMEE:0004381	Cdc45	12544	2-Cell Transient	0.98185
DBTMEE:0006911	Etv5	104156	2-Cell Transient	0.99147
DBTMEE:0011575	Leprel1	210530	2-Cell Transient	0.88239
DBTMEE:0003039	Atp13a5	268878	2-Cell Transient	0.91999
DBTMEE:0011863	Lsg1	224092	2-Cell Transient	0.96446
DBTMEE:0011800	Lrrc33	224109	2-Cell Transient	0.97901
DBTMEE:0007383	Fbxo45	268882	2-Cell Transient	0.98441
DBTMEE:0010728	Iqcg	69707	2-Cell Transient	0.9769
DBTMEE:0015795	Parp14	547253	2-Cell Transient	0.98928
DBTMEE:0022834	Zdhhc23	332175	2-Cell Transient	0.95953
DBTMEE:0003253	BC016579	212998	2-Cell Transient	0.96911
DBTMEE:0021389	Rg9mtd1	52575	2-Cell Transient	0.97675
DBTMEE:0000997	4930453N24Rik	67609	2-Cell Transient	0.98182
DBTMEE:0005613	D16Ertd472e	67102	2-Cell Transient	0.96656
DBTMEE:0018339	Scaf4	224432	2-Cell Transient	0.92134
DBTMEE:0006158	Dnajc28	246738	2-Cell Transient	0.99235
DBTMEE:0010949	Kcne1	16509	2-Cell Transient	0.98689
DBTMEE:0016248	Pigp	56176	2-Cell Transient	0.98123
DBTMEE:0011501	Lca5l	385668	2-Cell Transient	0.89919
DBTMEE:0018116	Rps6ka2	20112	2-Cell Transient	0.98851
DBTMEE:0020476	Gm9880		2-Cell Transient	0.99803
DBTMEE:0020474	Tcp10a		2-Cell Transient	0.99803
DBTMEE:0020476	Tcp10c		2-Cell Transient	0.99803
DBTMEE:0022368	Vmn2r92	627111	2-Cell Transient	0.96934
DBTMEE:0023099	Zfp677	210503	2-Cell Transient	0.96356
DBTMEE:0023213	Zfp948	381066	2-Cell Transient	0.99551
DBTMEE:0023132	Zfp760	240034	2-Cell Transient	0.95866
DBTMEE:0023130	Zfp758	224598	2-Cell Transient	0.95996
DBTMEE:0016151	Pgp	67078	2-Cell Transient	0.93656
DBTMEE:0016331	Pkd1	18763	2-Cell Transient	0.96437
DBTMEE:0018050	Rpl3l	66211	2-Cell Transient	0.99757
DBTMEE:0013382	Sepx1	27361	2-Cell Transient	0.99803
DBTMEE:0010277	Hs3st6	328779	2-Cell Transient	0.99647
DBTMEE:0017241	Ptx4	68509	2-Cell Transient	0.96915
DBTMEE:0021241	Tpsb2	17229	2-Cell Transient	0.96912
DBTMEE:0018131	Rpusd1	106707	2-Cell Transient	0.98042
DBTMEE:0022779	Zbtb9	474156	2-Cell Transient	0.95672
DBTMEE:0012083	Mapk14	26416	2-Cell Transient	0.99682
DBTMEE:0011038	Kctd20	66989	2-Cell Transient	0.99229
DBTMEE:0005555	Cyp4f17	208285	2-Cell Transient	0.99704
DBTMEE:0010899	Kank3	80880	2-Cell Transient	0.9663
DBTMEE:0009803	H2-DMb2	15000	2-Cell Transient	0.9545
DBTMEE:0009805	H2-Eb1	14969	2-Cell Transient	0.98065
DBTMEE:0009806	H2-Eb2	381091	2-Cell Transient	0.96916
DBTMEE:0011912	Ly6g5c	114652	2-Cell Transient	0.9888
DBTMEE:0009439	Gpank1	81845	2-Cell Transient	0.93532
DBTMEE:0009826	H2-Q1	15006	2-Cell Transient	0.98942
DBTMEE:0009828	H2-Q2	15013	2-Cell Transient	0.92687
DBTMEE:0009829	H2-Gs10	15015	2-Cell Transient	0.98188
DBTMEE:0009833	H2-Q8	15019	2-Cell Transient	0.98732
DBTMEE:0009831	H2-Q6	110557	2-Cell Transient	0.99268
DBTMEE:0010421	Ier3	15937	2-Cell Transient	0.99523
DBTMEE:0012224	Mdc1	240087	2-Cell Transient	0.98406
DBTMEE:0007796	Gabbr1	54393	2-Cell Transient	0.99096
DBTMEE:0016968	Prph2	19133	2-Cell Transient	0.98491
DBTMEE:0021296	Trerf1	224829	2-Cell Transient	0.98542
DBTMEE:0001813	AI661453	224833	2-Cell Transient	0.97449
DBTMEE:0001261	4932415M13Rik	211496	2-Cell Transient	0.96884
DBTMEE:0007443	Fem1a	14154	2-Cell Transient	0.92404
DBTMEE:0020860	Tmem146	106757	2-Cell Transient	0.99366
DBTMEE:0022704	Yipf4	67864	2-Cell Transient	0.95833
DBTMEE:0007265	Fam82a1	381110	2-Cell Transient	0.9323
DBTMEE:0016443	Plekhh2	213556	2-Cell Transient	0.94108
DBTMEE:0019144	Slc3a1	20532	2-Cell Transient	0.97357
DBTMEE:0006785	Epcam	17075	2-Cell Transient	0.99503
DBTMEE:0018956	Slc22a1	20517	2-Cell Transient	0.96909
DBTMEE:0016515	Pnldc1	240023	2-Cell Transient	0.98505
DBTMEE:0021856	Unc93a	381058	2-Cell Transient	0.93605
DBTMEE:0016826	Prdm9	213389	2-Cell Transient	0.99933
DBTMEE:0022370	Vmn2r94	665227	2-Cell Transient	0.91982
DBTMEE:0022273	Vmn2r114	666002	2-Cell Transient	0.96934
DBTMEE:0021109	Tnfrsf12a	27279	2-Cell Transient	0.99863
DBTMEE:0007571	Flywch1	224613	2-Cell Transient	0.94801
DBTMEE:0017029	Prss41	71003	2-Cell Transient	0.9499
DBTMEE:0017013	Prss22	70835	2-Cell Transient	0.88481
DBTMEE:0005169	Cramp1l	57354	2-Cell Transient	0.96846
DBTMEE:0013375	Msln	56047	2-Cell Transient	0.99448
DBTMEE:0012314	Metrn	70083	2-Cell Transient	0.96252
DBTMEE:0017748	Rhbdl1	214951	2-Cell Transient	0.9898
DBTMEE:0022574	Wfikkn1	215001	2-Cell Transient	0.99354
DBTMEE:0005866	Decr2	26378	2-Cell Transient	0.95988
DBTMEE:0003377	Bak1	12018	2-Cell Transient	0.98867
DBTMEE:0020477	Tcp11	21463	2-Cell Transient	0.95977
DBTMEE:0020022	Stk38	106504	2-Cell Transient	0.91582
DBTMEE:0014090	Notch3	18131	2-Cell Transient	0.95381
DBTMEE:0017483	Rasal3	320484	2-Cell Transient	0.96938
DBTMEE:0005552	Cyp4f14	64385	2-Cell Transient	0.96932
DBTMEE:0000857	4921501E09Rik	74042	2-Cell Transient	0.96915
DBTMEE:0005473	Cyp21a1	13079	2-Cell Transient	0.96191
DBTMEE:0013367	Msh5	17687	2-Cell Transient	0.97839
DBTMEE:0011911	Ly6g5b	266614	2-Cell Transient	0.94783
DBTMEE:0005284	Csnk2b	13001	2-Cell Transient	0.87797
DBTMEE:0002714	Apom	55938	2-Cell Transient	0.9958
DBTMEE:0011881	Lta	16992	2-Cell Transient	0.98637
DBTMEE:0020450	Tcf19	106795	2-Cell Transient	0.99747
DBTMEE:0016988	Prr3	75210	2-Cell Transient	0.92203
DBTMEE:0009838	H2-T24	15042	2-Cell Transient	0.96911
DBTMEE:0009836	H2-T22		2-Cell Transient	0.99516
DBTMEE:0009840	H2-T9		2-Cell Transient	0.99516
DBTMEE:0009799	H2-Bl	14963	2-Cell Transient	0.99754
DBTMEE:0009815	H2-M10.3	110696	2-Cell Transient	0.96915
DBTMEE:0014553	Olfr115	257908	2-Cell Transient	0.9691
DBTMEE:0003895	Capn11	268958	2-Cell Transient	0.99612
DBTMEE:0022016	Vegfa	22339	2-Cell Transient	0.99555
DBTMEE:0016570	Polh	80905	2-Cell Transient	0.96169
DBTMEE:0018980	Slc22a7	108114	2-Cell Transient	0.96908
DBTMEE:0017180	Ptk7	71461	2-Cell Transient	0.97894
DBTMEE:0004947	Cnpy3	72029	2-Cell Transient	0.98351
DBTMEE:0017148	Ptcra	19208	2-Cell Transient	0.86911
DBTMEE:0003289	BC032203	210982	2-Cell Transient	0.93613
DBTMEE:0022277	Vmn2r118	383258	2-Cell Transient	0.9839
DBTMEE:0006248	Dpp9	224897	2-Cell Transient	0.99509
DBTMEE:0023303	Znrf4	20834	2-Cell Transient	0.9691
DBTMEE:0002010	Acer1	171168	2-Cell Transient	0.99199
DBTMEE:0007285	Fam98a	72722	2-Cell Transient	0.94738
DBTMEE:0012193	Mcfd2	193813	2-Cell Transient	0.95022
DBTMEE:0003378	Bambi	68010	2-Cell Transient	0.97214
DBTMEE:0001586	9430020K01Rik	240185	2-Cell Transient	0.76786
DBTMEE:0017524	Rbbp8	225182	2-Cell Transient	0.91837
DBTMEE:0020283	Taf4b	72504	2-Cell Transient	0.95756
DBTMEE:0011099	Kif20a	19348	2-Cell Transient	0.96631
DBTMEE:0000376	1700066B19Rik	73449	2-Cell Transient	0.97796
DBTMEE:0022518	Wdr55	67936	2-Cell Transient	0.99869
DBTMEE:0015883	Pcdhb2	93873	2-Cell Transient	0.93245
DBTMEE:0015888	Pcdhb4	93875	2-Cell Transient	0.96938
DBTMEE:0015891	Pcdhb7	93878	2-Cell Transient	0.96527
DBTMEE:0015885	Pcdhb21	93892	2-Cell Transient	0.96922
DBTMEE:0006105	Dmxl1	240283	2-Cell Transient	0.95367
DBTMEE:0000371	1700065I17Rik	67343	2-Cell Transient	0.99797
DBTMEE:0015992	Pde6a	225600	2-Cell Transient	0.99042
DBTMEE:0010638	Impa2	114663	2-Cell Transient	0.92979
DBTMEE:0019282	Slmo1	225655	2-Cell Transient	0.99843
DBTMEE:0018509	Seh1l	72124	2-Cell Transient	0.94627
DBTMEE:0004550	Cep192	70799	2-Cell Transient	0.95284
DBTMEE:0019301	Smad7	17131	2-Cell Transient	0.99804
DBTMEE:0018874	Skor2	664805	2-Cell Transient	0.96937
DBTMEE:0003988	Cbln2	12405	2-Cell Transient	0.96011
DBTMEE:0005192	Crem	12916	2-Cell Transient	0.99175
DBTMEE:0002867	Armc4	74934	2-Cell Transient	0.87215
DBTMEE:0013215	Mpp7	75739	2-Cell Transient	0.95289
DBTMEE:0006874	Esco1	77805	2-Cell Transient	0.91386
DBTMEE:0002731	Aqp4	11829	2-Cell Transient	0.96917
DBTMEE:0007080	Fam13b	225358	2-Cell Transient	0.96131
DBTMEE:0004363	Cdc25c	12532	2-Cell Transient	0.99155
DBTMEE:0018982	Slc23a1	20522	2-Cell Transient	0.98509
DBTMEE:0020887	Tmem173	72512	2-Cell Transient	0.98916
DBTMEE:0009904	Hbegf	15200	2-Cell Transient	0.97401
DBTMEE:0002661	Apbb3	225372	2-Cell Transient	0.98271
DBTMEE:0006428	E230025N22Rik	240216	2-Cell Transient	0.96914
DBTMEE:0004258	Cd14	12475	2-Cell Transient	0.99569
DBTMEE:0019002	Slc25a2	83885	2-Cell Transient	0.99579
DBTMEE:0007445	Fem1c	240263	2-Cell Transient	0.99992
DBTMEE:0012109	March3	320253	2-Cell Transient	0.90163
DBTMEE:0020472	Tcof1	21453	2-Cell Transient	0.97894
DBTMEE:0003106	Atp8b1	54670	2-Cell Transient	0.97391
DBTMEE:0017200	Ptpn2	19255	2-Cell Transient	0.95437
DBTMEE:0005766	Dcc	13176	2-Cell Transient	0.96167
DBTMEE:0011659	Lipg	16891	2-Cell Transient	0.9658
DBTMEE:0010282	Hsbp1l1	66255	2-Cell Transient	0.96215
DBTMEE:0005323	Ctdp1	67655	2-Cell Transient	0.99581
DBTMEE:0022983	Zfp407	240476	2-Cell Transient	0.96622
DBTMEE:0013437	Mtl5	17771	2-Cell Transient	0.92895
DBTMEE:0017214	Ptprcap	19265	2-Cell Transient	0.96909
DBTMEE:0019055	Slc29a2	13340	2-Cell Transient	0.98664
DBTMEE:0002650	Gm962	381201	2-Cell Transient	0.9728
DBTMEE:0011888	Ltbp3	16998	2-Cell Transient	0.94381
DBTMEE:0013650	Naaladl1	381204	2-Cell Transient	0.99145
DBTMEE:0009460	Gpha2	170458	2-Cell Transient	0.97884
DBTMEE:0010696	Ints5	109077	2-Cell Transient	0.9588
DBTMEE:0003196	B3gat3	72727	2-Cell Transient	0.9895
DBTMEE:0007715	Fth1	14319	2-Cell Transient	0.95131
DBTMEE:0014941	Olfr235	258681	2-Cell Transient	0.96915
DBTMEE:0005597	D030056L22Rik	225995	2-Cell Transient	0.99854
DBTMEE:0022854	Zfand5	22682	2-Cell Transient	0.97649
DBTMEE:0006094	Dmrt3	240590	2-Cell Transient	0.99083
DBTMEE:0011023	Kcnv2	240595	2-Cell Transient	0.99127
DBTMEE:0021830	Uhrf2	109113	2-Cell Transient	0.96226
DBTMEE:0005311	Cstf2t	83410	2-Cell Transient	0.99919
DBTMEE:0012429	Minpp1	17330	2-Cell Transient	0.98142
DBTMEE:0010441	Ifit2	15958	2-Cell Transient	0.99773
DBTMEE:0011100	Kif20b	240641	2-Cell Transient	0.89647
DBTMEE:0007674	Frat1	14296	2-Cell Transient	0.97776
DBTMEE:0001321	4933411K16Rik	66765	2-Cell Transient	0.94124
DBTMEE:0016222	Pi4k2a	84095	2-Cell Transient	0.99582
DBTMEE:0012127	Marveld1	277010	2-Cell Transient	0.99873
DBTMEE:0018369	Scd4	329065	2-Cell Transient	0.96925
DBTMEE:0016079	Peo1	226153	2-Cell Transient	0.97121
DBTMEE:0021373	Trim8	93679	2-Cell Transient	0.94018
DBTMEE:0004931	Cnnm2	94219	2-Cell Transient	0.99031
DBTMEE:0013519	Mxi1	17859	2-Cell Transient	0.98226
DBTMEE:0006348	Dusp5	240672	2-Cell Transient	0.96662
DBTMEE:0002230	Adrb1	11554	2-Cell Transient	0.95684
DBTMEE:0009642	Grk5	14773	2-Cell Transient	0.75125
DBTMEE:0003940	Carns1	107239	2-Cell Transient	0.99423
DBTMEE:0020369	Tbc1d10c	108995	2-Cell Transient	0.99809
DBTMEE:0017413	Rad9	19367	2-Cell Transient	0.97771
DBTMEE:0003402	Bbs1	52028	2-Cell Transient	0.99255
DBTMEE:0016074	Peli3	240518	2-Cell Transient	0.97454
DBTMEE:0004151	Ccdc85b	240514	2-Cell Transient	0.96221
DBTMEE:0007280	Fam89b	17826	2-Cell Transient	0.98242
DBTMEE:0020695	Tigd3	332359	2-Cell Transient	0.99772
DBTMEE:0018967	Slc22a20	381203	2-Cell Transient	0.96624
DBTMEE:0018269	Sac3d1	66406	2-Cell Transient	0.95385
DBTMEE:0022017	Vegfb	22340	2-Cell Transient	0.98776
DBTMEE:0006161	Dnajc4	57431	2-Cell Transient	0.96238
DBTMEE:0005107	Cox8a	12868	2-Cell Transient	0.94122
DBTMEE:0018971	BC014805	236149	2-Cell Transient	0.96917
DBTMEE:0018973	Gm5631	434674	2-Cell Transient	0.97441
DBTMEE:0017978	Rom1	19881	2-Cell Transient	0.95911
DBTMEE:0007007	Fads2	56473	2-Cell Transient	0.9276
DBTMEE:0005714	Dagla	269060	2-Cell Transient	0.94612
DBTMEE:0020853	Tmem138	72982	2-Cell Transient	0.94645
DBTMEE:0000202	1700017D01Rik	69369	2-Cell Transient	0.97335
DBTMEE:0014793	Olfr1419	257938	2-Cell Transient	0.96911
DBTMEE:0014955	Olfr262	258683	2-Cell Transient	0.96907
DBTMEE:0017985	Rorb	225998	2-Cell Transient	0.96935
DBTMEE:0002547	Ankrd22	52024	2-Cell Transient	0.96332
DBTMEE:0019271	Slit1	20562	2-Cell Transient	0.98001
DBTMEE:0007675	Frat2	212398	2-Cell Transient	0.96543
DBTMEE:0019011	Slc25a28	246696	2-Cell Transient	0.98526
DBTMEE:0005133	Cpn1	93721	2-Cell Transient	0.92026
DBTMEE:0018366	Scd1	20249	2-Cell Transient	0.98785
DBTMEE:0003850	Calhm1	546729	2-Cell Transient	0.95722
DBTMEE:0019348	Smndc1	76479	2-Cell Transient	0.86012
DBTMEE:0021865	Upf2	326622	2-Cell Transient	0.93974
DBTMEE:0013593	Myo3a	667663	2-Cell Transient	0.98778
DBTMEE:0016536	Pnpla7	241274	2-Cell Transient	0.9898
DBTMEE:0014184	Nrarp	67122	2-Cell Transient	0.9654
DBTMEE:0011534	Lcn9	77704	2-Cell Transient	0.96388
DBTMEE:0007903	Gbgt1	227671	2-Cell Transient	0.97117
DBTMEE:0004566	Cercam	99151	2-Cell Transient	0.99896
DBTMEE:0016217	Phyhd1	227696	2-Cell Transient	0.99964
DBTMEE:0014249	Mettl11a	66617	2-Cell Transient	0.98823
DBTMEE:0017006	Prrx2	20204	2-Cell Transient	0.98342
DBTMEE:0002312	Aif1l	108897	2-Cell Transient	0.9971
DBTMEE:0004747	Ciz1	68379	2-Cell Transient	0.95708
DBTMEE:0013669	Naif1	71254	2-Cell Transient	0.98813
DBTMEE:0019948	St6galnac6		2-Cell Transient	0.99426
DBTMEE:0019946	St6galnac4		2-Cell Transient	0.99426
DBTMEE:0010327	Hspa5	14828	2-Cell Transient	0.96058
DBTMEE:0005672	D730039F16Rik	77996	2-Cell Transient	0.96907
DBTMEE:0017170	Ptgs1	19224	2-Cell Transient	0.95648
DBTMEE:0006784	Epc2	227867	2-Cell Transient	0.93939
DBTMEE:0021101	Tnfaip6	21930	2-Cell Transient	0.95928
DBTMEE:0017813	Rif1	51869	2-Cell Transient	0.99673
DBTMEE:0005292	Csrnp3	77771	2-Cell Transient	0.86086
DBTMEE:0010918	Kbtbd10	228003	2-Cell Transient	0.99184
DBTMEE:0011186	Klhl23	277396	2-Cell Transient	0.96614
DBTMEE:0013594	Myo3b	329421	2-Cell Transient	0.96098
DBTMEE:0022788	Zc3h15	69082	2-Cell Transient	0.9563
DBTMEE:0008435	Gm13718	100270744	2-Cell Transient	0.99642
DBTMEE:0022715	Ypel4	241525	2-Cell Transient	0.99668
DBTMEE:0003710	C1qtnf4	67445	2-Cell Transient	0.97677
DBTMEE:0000287	1700029I15Rik	75641	2-Cell Transient	0.9893
DBTMEE:0005312	Cstf3	228410	2-Cell Transient	0.99758
DBTMEE:0011600	Lgr4	107515	2-Cell Transient	0.961
DBTMEE:0014690	Olfr1301	258889	2-Cell Transient	0.96915
DBTMEE:0020647	Thbs1	21825	2-Cell Transient	0.98717
DBTMEE:0012380	Mga	29808	2-Cell Transient	0.99978
DBTMEE:0005327	Ctdspl2	329506	2-Cell Transient	0.92081
DBTMEE:0006625	Eif3j	78655	2-Cell Transient	0.97939
DBTMEE:0001304	4933406J08Rik	74401	2-Cell Transient	0.99287
DBTMEE:0019046	Slc27a2	26458	2-Cell Transient	0.95711
DBTMEE:0002647	Ap4e1	108011	2-Cell Transient	0.98382
DBTMEE:0012304	Mertk	17289	2-Cell Transient	0.99166
DBTMEE:0001826	AU015228	99169	2-Cell Transient	0.99934
DBTMEE:0000225	1700020A23Rik	75656	2-Cell Transient	0.96907
DBTMEE:0013325	Mrps26	99045	2-Cell Transient	0.96044
DBTMEE:0010318	Hspa12b	72630	2-Cell Transient	0.99249
DBTMEE:0016931	Prnp	19122	2-Cell Transient	0.9908
DBTMEE:0016930	Prnd	26434	2-Cell Transient	0.95664
DBTMEE:0020449	Tcf15	21407	2-Cell Transient	0.98932
DBTMEE:0001499	6820408C15Rik	228778	2-Cell Transient	0.95612
DBTMEE:0005093	Cox4i2	84682	2-Cell Transient	0.97441
DBTMEE:0021247	Tpx2	72119	2-Cell Transient	0.90282
DBTMEE:0021587	Ttll9	74711	2-Cell Transient	0.99059
DBTMEE:0003980	Cbfa2t2	12396	2-Cell Transient	0.99843
DBTMEE:0006775	Epb4.1l1	13821	2-Cell Transient	0.97668
DBTMEE:0008415	Gm1332	383766	2-Cell Transient	0.96912
DBTMEE:0018075	Rprd1b	70470	2-Cell Transient	0.95633
DBTMEE:0019404	Snhg11	319317	2-Cell Transient	0.97006
DBTMEE:0018715	Sgk2	27219	2-Cell Transient	0.95358
DBTMEE:0019381	Snai1	20613	2-Cell Transient	0.9953
DBTMEE:0017194	Ptpn1	19246	2-Cell Transient	0.98813
DBTMEE:0003966	Cass4	320664	2-Cell Transient	0.99863
DBTMEE:0023169	Zfp831	100043757	2-Cell Transient	0.97569
DBTMEE:0015614	Osbpl2	228983	2-Cell Transient	0.97275
DBTMEE:0016604	Polr3k	67005	2-Cell Transient	0.99027
DBTMEE:0018500	Sec61a2	57743	2-Cell Transient	0.99685
DBTMEE:0009841	H2afb1	68231	2-Cell Transient	0.9982
DBTMEE:0006141	Dnajc1	13418	2-Cell Transient	0.97303
DBTMEE:0016295	Pip4k2a	18718	2-Cell Transient	0.96448
DBTMEE:0000878	4921530D09Rik	77058	2-Cell Transient	0.96909
DBTMEE:0013658	Nacc2	67991	2-Cell Transient	0.9609
DBTMEE:0000269	1700026L06Rik	69987	2-Cell Transient	0.96908
DBTMEE:0021448	Trub2	227682	2-Cell Transient	0.97532
DBTMEE:0005631	D2Wsu81e	227695	2-Cell Transient	0.96106
DBTMEE:0006217	Dolk	227697	2-Cell Transient	0.99547
DBTMEE:0017160	Ptges	64292	2-Cell Transient	0.96473
DBTMEE:0007519	Fibcd1	98970	2-Cell Transient	0.99145
DBTMEE:0007262	Fam78a	241303	2-Cell Transient	0.9905
DBTMEE:0022757	Zbtb34	241311	2-Cell Transient	0.95755
DBTMEE:0007870	Gapvd1	66691	2-Cell Transient	0.98765
DBTMEE:0014037	Nmi	64685	2-Cell Transient	0.99485
DBTMEE:0006862	Ermn	77767	2-Cell Transient	0.91194
DBTMEE:0022552	Wdsub1	72137	2-Cell Transient	0.92053
DBTMEE:0004304	Cd302	66205	2-Cell Transient	0.96919
DBTMEE:0019703	Spc25	66442	2-Cell Transient	0.96585
DBTMEE:0019641	Sp3	20687	2-Cell Transient	0.9945
DBTMEE:0021549	Ttc30a2	620631	2-Cell Transient	0.97668
DBTMEE:0021548	Ttc30a1	78802	2-Cell Transient	0.99027
DBTMEE:0020602	Tfpi	21788	2-Cell Transient	0.98565
DBTMEE:0022839	Zdhhc5	228136	2-Cell Transient	0.94442
DBTMEE:0014610	Olfr1217	258903	2-Cell Transient	0.89486
DBTMEE:0005229	Cry2	12953	2-Cell Transient	0.98863
DBTMEE:0008443	Gm13889	620695	2-Cell Transient	0.91123
DBTMEE:0004684	Chrm5	213788	2-Cell Transient	0.98857
DBTMEE:0002765	Arhgap11a	228482	2-Cell Transient	0.98697
DBTMEE:0023136	Zfp770	228491	2-Cell Transient	0.92813
DBTMEE:0003529	Bmf	171543	2-Cell Transient	0.99711
DBTMEE:0001681	A430105I19Rik	214239	2-Cell Transient	0.99709
DBTMEE:0017773	Rhov	228543	2-Cell Transient	0.97638
DBTMEE:0021527	Ttbk2	140810	2-Cell Transient	0.99071
DBTMEE:0021945	Usp50	75083	2-Cell Transient	0.97995
DBTMEE:0000497	1810024B03Rik	329509	2-Cell Transient	0.99601
DBTMEE:0007315	Fastkd5		2-Cell Transient	0.99149
DBTMEE:0021753	Ubox5		2-Cell Transient	0.99149
DBTMEE:0002132	Adam33	110751	2-Cell Transient	0.99449
DBTMEE:0018811	Siglec1	20612	2-Cell Transient	0.90631
DBTMEE:0002226	Adra1d	11550	2-Cell Transient	0.96013
DBTMEE:0017505	Rassf2	215653	2-Cell Transient	0.9689
DBTMEE:0009870	Hao1	15112	2-Cell Transient	0.99638
DBTMEE:0018511	Sel1l2	228684	2-Cell Transient	0.85502
DBTMEE:0013681	Nanp	67311	2-Cell Transient	0.98212
DBTMEE:0021307	Trib3	228775	2-Cell Transient	0.99798
DBTMEE:0014210	Nrsn2	228777	2-Cell Transient	0.95426
DBTMEE:0005901	Defb23	629114	2-Cell Transient	0.9527
DBTMEE:0019541	Snta1	20648	2-Cell Transient	0.98069
DBTMEE:0007955	Gdf5	14563	2-Cell Transient	0.98648
DBTMEE:0011982	Mafb	16658	2-Cell Transient	0.93753
DBTMEE:0022572	Wfdc8	277343	2-Cell Transient	0.96909
DBTMEE:0021149	Tnnc2	21925	2-Cell Transient	0.99585
DBTMEE:0019675	Spata2	263876	2-Cell Transient	0.99479
DBTMEE:0020909	Tmem189	407243	2-Cell Transient	0.98705
DBTMEE:0005321	Ctcfl	664799	2-Cell Transient	0.97651
DBTMEE:0006026	Dido1	23856	2-Cell Transient	0.97369
DBTMEE:0022721	Ythdf1	228994	2-Cell Transient	0.96907
DBTMEE:0006519	Eef1a2	13628	2-Cell Transient	0.9857
DBTMEE:0017179	Ptk6	20459	2-Cell Transient	0.96913
DBTMEE:0009344	Gmeb2	229004	2-Cell Transient	0.98986
DBTMEE:0005568	Cypt12	75439	2-Cell Transient	0.96906
DBTMEE:0006648	Eif5a2	208691	2-Cell Transient	0.9906
DBTMEE:0023080	Zfp639	67778	2-Cell Transient	0.99607
DBTMEE:0017343	Rab33b	19338	2-Cell Transient	0.88718
DBTMEE:0021456	Tsc22d2	72033	2-Cell Transient	0.97191
DBTMEE:0003693	C130079G13Rik	229333	2-Cell Transient	0.96935
DBTMEE:0017240	Ptx3	19288	2-Cell Transient	0.97692
DBTMEE:0010548	Il12a	16159	2-Cell Transient	0.99308
DBTMEE:0001205	4930579G24Rik	75939	2-Cell Transient	0.99077
DBTMEE:0010689	Insrr	23920	2-Cell Transient	0.98489
DBTMEE:0010777	Isg20l2	229504	2-Cell Transient	0.96493
DBTMEE:0009445	Gpatch4	66614	2-Cell Transient	0.9831
DBTMEE:0002808	Arhgef2	16800	2-Cell Transient	0.99818
DBTMEE:0017282	Pygo2	68911	2-Cell Transient	0.8737
DBTMEE:0015836	Pbxip1	229534	2-Cell Transient	0.93538
DBTMEE:0018780	She	214547	2-Cell Transient	0.98825
DBTMEE:0000415	1700094D03Rik	73545	2-Cell Transient	0.98878
DBTMEE:0018244	S100a13	20196	2-Cell Transient	0.99831
DBTMEE:0018129	Rptn	20129	2-Cell Transient	0.96918
DBTMEE:0020461	Tchh	99681	2-Cell Transient	0.99994
DBTMEE:0011947	Lysmd1	217779	2-Cell Transient	0.97884
DBTMEE:0018539	Sema6c	20360	2-Cell Transient	0.98837
DBTMEE:0005374	Ctss	13040	2-Cell Transient	0.96944
DBTMEE:0010193	Hormad1	67981	2-Cell Transient	0.9992
DBTMEE:0002560	Ankrd35	213121	2-Cell Transient	0.99726
DBTMEE:0016229	Pias3	229615	2-Cell Transient	0.99092
DBTMEE:0009059	Gm5544	433632	2-Cell Transient	0.88771
DBTMEE:0002130	Adam30	71078	2-Cell Transient	0.95264
DBTMEE:0023107	Zfp697	242109	2-Cell Transient	0.99267
DBTMEE:0013924	Ngf	18049	2-Cell Transient	0.99352
DBTMEE:0005938	Dennd2c	329727	2-Cell Transient	0.99132
DBTMEE:0018917	Slc16a1	20501	2-Cell Transient	0.95555
DBTMEE:0015666	Ovgp1	12659	2-Cell Transient	0.99015
DBTMEE:0013532	Mybphl	68753	2-Cell Transient	0.96913
DBTMEE:0011804	Lrrc39	109245	2-Cell Transient	0.9981
DBTMEE:0006977	F3	14066	2-Cell Transient	0.97147
DBTMEE:0002780	Arhgap29	214137	2-Cell Transient	0.98027
DBTMEE:0013883	Neurog2	11924	2-Cell Transient	0.99199
DBTMEE:0020692	Tifa	211550	2-Cell Transient	0.99583
DBTMEE:0020264	Tacr3	21338	2-Cell Transient	0.9653
DBTMEE:0023297	Znhit6	229937	2-Cell Transient	0.98563
DBTMEE:0003429	Bcl10	12042	2-Cell Transient	0.94232
DBTMEE:0000639	2410004B18Rik	66421	2-Cell Transient	0.95701
DBTMEE:0012211	Mcoln3	171166	2-Cell Transient	0.93881
DBTMEE:0007725	Fubp1	51886	2-Cell Transient	0.93772
DBTMEE:0005564	Cyp7b1	13123	2-Cell Transient	0.99137
DBTMEE:0004201	Ccna2	12428	2-Cell Transient	0.97266
DBTMEE:0002571	Ankrd50	99696	2-Cell Transient	0.96856
DBTMEE:0015706	Pabpc4l	241989	2-Cell Transient	0.96935
DBTMEE:0018663	Setd7	73251	2-Cell Transient	0.99686
DBTMEE:0007677	Frem2	242022	2-Cell Transient	0.97457
DBTMEE:0017706	Rfxap	170767	2-Cell Transient	0.97986
DBTMEE:0018580	Serp1	28146	2-Cell Transient	0.94646
DBTMEE:0010518	Igsf10	242050	2-Cell Transient	0.95236
DBTMEE:0019084	Slc33a1	11416	2-Cell Transient	0.9759
DBTMEE:0007605	Fnip2	329679	2-Cell Transient	0.99777
DBTMEE:0020753	Tlr2	24088	2-Cell Transient	0.92625
DBTMEE:0007435	Fcrls	80891	2-Cell Transient	0.95194
DBTMEE:0021030	Tmem79	71913	2-Cell Transient	0.99788
DBTMEE:0019029	Slc25a44	229517	2-Cell Transient	0.99192
DBTMEE:0013388	Msto1	229524	2-Cell Transient	0.952
DBTMEE:0010618	Il6ra	16194	2-Cell Transient	0.99411
DBTMEE:0020499	Tdpoz1	207213	2-Cell Transient	0.99068
DBTMEE:0008221	Gm10697	100042761	2-Cell Transient	0.99178
DBTMEE:0009299	Gm9125	668359	2-Cell Transient	0.99755
DBTMEE:0016298	Pip5k1a	18720	2-Cell Transient	0.96319
DBTMEE:0021104	Tnfaip8l2	69769	2-Cell Transient	0.99251
DBTMEE:0008350	Gm128	229588	2-Cell Transient	0.99161
DBTMEE:0003556	Bnipl	171388	2-Cell Transient	0.97059
DBTMEE:0012032	Man1a2	17156	2-Cell Transient	0.94811
DBTMEE:0020173	Sycp1	20957	2-Cell Transient	0.9946
DBTMEE:0014163	Nr1h5	381463	2-Cell Transient	0.96909
DBTMEE:0005776	Dclre1b	140917	2-Cell Transient	0.94712
DBTMEE:0005831	Ddx20	53975	2-Cell Transient	0.96467
DBTMEE:0019201	Slc6a17	229706	2-Cell Transient	0.99032
DBTMEE:0020073	Stxbp3a	20912	2-Cell Transient	0.93068
DBTMEE:0007023	Fam102b	329739	2-Cell Transient	0.96283
DBTMEE:0004356	Cdc14a	229776	2-Cell Transient	0.98652
DBTMEE:0010017	Hiat1	15247	2-Cell Transient	0.98257
DBTMEE:0013613	Myoz2	59006	2-Cell Transient	0.96912
DBTMEE:0002814	Arhgef38	77669	2-Cell Transient	0.96917
DBTMEE:0022525	Wdr63	242253	2-Cell Transient	0.9512
DBTMEE:0020632	Tgs1	116940	2-Cell Transient	0.98178
DBTMEE:0021414	Trp53inp1	60599	2-Cell Transient	0.93443
DBTMEE:0017537	Rbm12b	72397	2-Cell Transient	0.95624
DBTMEE:0004949	Cnr1	12801	2-Cell Transient	0.88008
DBTMEE:0010470	Ifnk	387510	2-Cell Transient	0.96914
DBTMEE:0020939	Tmem215	320500	2-Cell Transient	0.89503
DBTMEE:0021692	Ubap1	67123	2-Cell Transient	0.99632
DBTMEE:0016581	Polr1e	64424	2-Cell Transient	0.95623
DBTMEE:0005750	Dcaf10	242418	2-Cell Transient	0.95811
DBTMEE:0009254	Gm829	329839	2-Cell Transient	0.96907
DBTMEE:0017928	Rnf20	109331	2-Cell Transient	0.95451
DBTMEE:0013963	Nipsnap3a	73398	2-Cell Transient	0.96917
DBTMEE:0021800	Ugcg	22234	2-Cell Transient	0.97744
DBTMEE:0019081	Slc31a1	20529	2-Cell Transient	0.98943
DBTMEE:0003625	Bspry	192120	2-Cell Transient	0.99751
DBTMEE:0019391	Snapc3	77634	2-Cell Transient	0.96156
DBTMEE:0008394	Gm13272	545648	2-Cell Transient	0.96908
DBTMEE:0006095	Dmrta1	242523	2-Cell Transient	0.96912
DBTMEE:0011410	L1td1	381591	2-Cell Transient	0.99941
DBTMEE:0007626	Foxd3	15221	2-Cell Transient	0.96908
DBTMEE:0008348	Gm12789	381536	2-Cell Transient	0.99833
DBTMEE:0005985	Dhcr24	74754	2-Cell Transient	0.99848
DBTMEE:0004394	Cdcp2	242603	2-Cell Transient	0.96911
DBTMEE:0011404	Kti12	100087	2-Cell Transient	0.98429
DBTMEE:0007010	Faf1	14084	2-Cell Transient	0.98884
DBTMEE:0018863	Skint2	329919	2-Cell Transient	0.96911
DBTMEE:0008351	Gm12824	666048	2-Cell Transient	0.99793
DBTMEE:0020001	Stil	20460	2-Cell Transient	0.9908
DBTMEE:0020549	Tesk2	230661	2-Cell Transient	0.99014
DBTMEE:0014727	Olfr1341	258852	2-Cell Transient	0.96915
DBTMEE:0014724	Olfr1339	258851	2-Cell Transient	0.96909
DBTMEE:0023286	Zmynd12	332934	2-Cell Transient	0.98214
DBTMEE:0009752	Guca2a	14915	2-Cell Transient	0.96906
DBTMEE:0017749	Rhbdl2	230726	2-Cell Transient	0.95644
DBTMEE:0017926	Rnf19b	75234	2-Cell Transient	0.95435
DBTMEE:0017993	Rpa2	19891	2-Cell Transient	0.9426
DBTMEE:0009444	Gpatch3	242691	2-Cell Transient	0.95545
DBTMEE:0021772	Ubxn11	67586	2-Cell Transient	0.95833
DBTMEE:0019878	Srsf10	14105	2-Cell Transient	0.96367
DBTMEE:0001148	4930549C01Rik	67663	2-Cell Transient	0.9821
DBTMEE:0018740	Sh2d5	230863	2-Cell Transient	0.97982
DBTMEE:0016364	Pla2g2c	18781	2-Cell Transient	0.96923
DBTMEE:0006791	Epha2	13836	2-Cell Transient	0.97787
DBTMEE:0008380	Gm13128	626995	2-Cell Transient	0.99716
DBTMEE:0017676	Rex2	100043034	2-Cell Transient	0.95108
DBTMEE:0008382	Gm13152		2-Cell Transient	0.969
DBTMEE:0008381	Gm13139		2-Cell Transient	0.969
DBTMEE:0023291	1700029I01Rik		2-Cell Transient	0.969
DBTMEE:0007745	Fv1	14349	2-Cell Transient	0.97611
DBTMEE:0011958	Lzic	69151	2-Cell Transient	0.89871
DBTMEE:0009510	Gpr157	269604	2-Cell Transient	0.99765
DBTMEE:0019066	Slc2a5	56485	2-Cell Transient	0.97685
DBTMEE:0017663	Rere	68703	2-Cell Transient	0.80823
DBTMEE:0009988	Hes2	15206	2-Cell Transient	0.98771
DBTMEE:0019103	Slc35e2	320541	2-Cell Transient	0.99481
DBTMEE:0001990	Acap3	140500	2-Cell Transient	0.89127
DBTMEE:0000614	2310042D19Rik	74183	2-Cell Transient	0.96774
DBTMEE:0010699	Ints8	72656	2-Cell Transient	0.99435
DBTMEE:0012042	Manea	242362	2-Cell Transient	0.99098
DBTMEE:0021197	Topors	106021	2-Cell Transient	0.9462
DBTMEE:0001801	AI464131	329828	2-Cell Transient	0.95449
DBTMEE:0003311	BC049635	277773	2-Cell Transient	0.91427
DBTMEE:0022771	Zbtb5	230119	2-Cell Transient	0.9957
DBTMEE:0020377	Tbc1d2	381605	2-Cell Transient	0.9891
DBTMEE:0007797	Gabbr2	242425	2-Cell Transient	0.99531
DBTMEE:0003354	Baat	12012	2-Cell Transient	0.99469
DBTMEE:0020150	Svep1	64817	2-Cell Transient	0.89431
DBTMEE:0020133	Susd1	634731	2-Cell Transient	0.97107
DBTMEE:0013496	Mup20	381530	2-Cell Transient	0.96914
DBTMEE:0009945	Hdhd3	72748	2-Cell Transient	0.94741
DBTMEE:0008400	Gm13280	230398	2-Cell Transient	0.96911
DBTMEE:0023348	Zyg11b	414872	2-Cell Transient	0.98226
DBTMEE:0009592	Gpx7	67305	2-Cell Transient	0.99173
DBTMEE:0016463	Plk3	12795	2-Cell Transient	0.9931
DBTMEE:0006236	Dph2	67728	2-Cell Transient	0.95497
DBTMEE:0006861	Ermap	27028	2-Cell Transient	0.91055
DBTMEE:0016664	Ppcs	106564	2-Cell Transient	0.97395
DBTMEE:0015671	Oxct2a	64059	2-Cell Transient	0.99708
DBTMEE:0022782	Zc3h12a	230738	2-Cell Transient	0.99015
DBTMEE:0020671	Thrap3	230753	2-Cell Transient	0.89559
DBTMEE:0020528	Tekt2	24084	2-Cell Transient	0.9716
DBTMEE:0011521	Lck	16818	2-Cell Transient	0.9927
DBTMEE:0007110	Fam167b	230766	2-Cell Transient	0.97931
DBTMEE:0005768	Dcdc2b	100504491	2-Cell Transient	0.99204
DBTMEE:0010720	Iqcc	230767	2-Cell Transient	0.99479
DBTMEE:0021641	Txlna	109658	2-Cell Transient	0.98185
DBTMEE:0009263	Gm853	332942	2-Cell Transient	0.94615
DBTMEE:0018651	Sesn2	230784	2-Cell Transient	0.99796
DBTMEE:0020657	BC013712	230787	2-Cell Transient	0.99759
DBTMEE:0016748	Ppp1r8	100336	2-Cell Transient	0.95708
DBTMEE:0009658	Grrp1	72690	2-Cell Transient	0.89921
DBTMEE:0020445	Tceb3	27224	2-Cell Transient	0.97549
DBTMEE:0004352	Cda	72269	2-Cell Transient	0.9693
DBTMEE:0007213	Fam43b	625638	2-Cell Transient	0.97811
DBTMEE:0021771	Ubxn10	212190	2-Cell Transient	0.96528
DBTMEE:0016375	Pla2g5	18784	2-Cell Transient	0.98509
DBTMEE:0013717	Nbl1	17965	2-Cell Transient	0.99767
DBTMEE:0016792	Pqlc2	212555	2-Cell Transient	0.98349
DBTMEE:0005217	Crocc	230872	2-Cell Transient	0.92719
DBTMEE:0013833	Necap2	66147	2-Cell Transient	0.96372
DBTMEE:0008392	Gm13251	433791	2-Cell Transient	0.97269
DBTMEE:0002292	Agtrap	11610	2-Cell Transient	0.94045
DBTMEE:0011097	Kif1b	16561	2-Cell Transient	0.94335
DBTMEE:0014038	Nmnat1	66454	2-Cell Transient	0.99719
DBTMEE:0003927	Car6	12353	2-Cell Transient	0.92233
DBTMEE:0019158	Slc45a1	242773	2-Cell Transient	0.99452
DBTMEE:0016406	Plch2	269615	2-Cell Transient	0.98037
DBTMEE:0020321	Tas1r3	83771	2-Cell Transient	0.98491
DBTMEE:0003192	B3galt6	117592	2-Cell Transient	0.94608
DBTMEE:0010775	Isg15	100038882	2-Cell Transient	0.98515
DBTMEE:0018526	Sema3e	20349	2-Cell Transient	0.92924
DBTMEE:0011204	Klhl7	52323	2-Cell Transient	0.95364
DBTMEE:0004674	Chpf2	100910	2-Cell Transient	0.96897
DBTMEE:0004254	Cct8l1	242891	2-Cell Transient	0.99947
DBTMEE:0014072	Nom1	433864	2-Cell Transient	0.95605
DBTMEE:0021740	Ube3c	100763	2-Cell Transient	0.7357
DBTMEE:0004524	Cenpa	12615	2-Cell Transient	0.97557
DBTMEE:0016392	Plb1	665270	2-Cell Transient	0.99615
DBTMEE:0022727	Ywhah	22629	2-Cell Transient	0.98658
DBTMEE:0019182	Slc5a1	20537	2-Cell Transient	0.99511
DBTMEE:0013708	Nat8l	269642	2-Cell Transient	0.94944
DBTMEE:0009641	Grk4	14772	2-Cell Transient	0.96556
DBTMEE:0004166	Ccdc96	66717	2-Cell Transient	0.95432
DBTMEE:0019272	Slit2	20563	2-Cell Transient	0.90204
DBTMEE:0019086	Slc34a2	20531	2-Cell Transient	0.99617
DBTMEE:0015854	Pcdh7	54216	2-Cell Transient	0.99051
DBTMEE:0014232	Nsun7	70918	2-Cell Transient	0.98368
DBTMEE:0020878	Tmem165	21982	2-Cell Transient	0.9548
DBTMEE:0017667	Rest	19712	2-Cell Transient	0.86946
DBTMEE:0011732	Lphn3	319387	2-Cell Transient	0.93555
DBTMEE:0019969	Stap1	56792	2-Cell Transient	0.96908
DBTMEE:0006298	Dspp	666279	2-Cell Transient	0.96932
DBTMEE:0006267	Dr1	13486	2-Cell Transient	0.97322
DBTMEE:0007502	Fgfrl1	116701	2-Cell Transient	0.97881
DBTMEE:0013512	Mvk	17855	2-Cell Transient	0.9496
DBTMEE:0020463	Tchp	77832	2-Cell Transient	0.98078
DBTMEE:0017270	Pxn	19303	2-Cell Transient	0.95403
DBTMEE:0007033	Fam109a	231717	2-Cell Transient	0.9678
DBTMEE:0016708	Ppp1cc	19047	2-Cell Transient	0.96966
DBTMEE:0015687	P2rx7	18439	2-Cell Transient	0.99756
DBTMEE:0013102	Mlxip	208104	2-Cell Transient	0.97535
DBTMEE:0019525	Snrnp35	76167	2-Cell Transient	0.9902
DBTMEE:0000651	2410018M08Rik	71970	2-Cell Transient	0.94047
DBTMEE:0020062	Stx1a	20907	2-Cell Transient	0.97896
DBTMEE:0011985	Mafk	17135	2-Cell Transient	0.99839
DBTMEE:0004704	Chst12	59031	2-Cell Transient	0.98569
DBTMEE:0011583	Lfng	16848	2-Cell Transient	0.99118
DBTMEE:0003355	Baat1	231841	2-Cell Transient	0.99733
DBTMEE:0002491	Amz1	231842	2-Cell Transient	0.9892
DBTMEE:0001320	4933411G11Rik	330228	2-Cell Transient	0.99789
DBTMEE:0016510	Pms2	18861	2-Cell Transient	0.99532
DBTMEE:0002883	Arpc1a	56443	2-Cell Transient	0.96689
DBTMEE:0005539	Cyp3a57	622127	2-Cell Transient	0.96915
DBTMEE:0004449	Cdk8	264064	2-Cell Transient	0.91278
DBTMEE:0009731	Gtf3a	66596	2-Cell Transient	0.96004
DBTMEE:0016580	Polr1d	20018	2-Cell Transient	0.94162
DBTMEE:0021954	Uspl1	231915	2-Cell Transient	0.99994
DBTMEE:0003589	Brca2	12190	2-Cell Transient	0.99784
DBTMEE:0016039	Pds5b	100710	2-Cell Transient	0.89347
DBTMEE:0005736	Dbf4	27214	2-Cell Transient	0.94383
DBTMEE:0018164	Rsbn1l	242860	2-Cell Transient	0.99748
DBTMEE:0007338	Fbxl13	320118	2-Cell Transient	0.99552
DBTMEE:0017251	Pus7	78697	2-Cell Transient	0.96822
DBTMEE:0016834	Preb	50907	2-Cell Transient	0.98121
DBTMEE:0020842	Tmem129	68366	2-Cell Transient	0.98861
DBTMEE:0020268	Tada2b	231151	2-Cell Transient	0.90785
DBTMEE:0003523	Cno	117197	2-Cell Transient	0.96659
DBTMEE:0005105	Cox7b2	78174	2-Cell Transient	0.99758
DBTMEE:0020520	Tecrl	243078	2-Cell Transient	0.99435
DBTMEE:0021819	Ugt2b36	231396	2-Cell Transient	0.96917
DBTMEE:0021814	Ugt2a2		2-Cell Transient	0.96912
DBTMEE:0021813	Ugt2a1		2-Cell Transient	0.96912
DBTMEE:0009659	Grsf1	231413	2-Cell Transient	0.98707
DBTMEE:0005423	Cxcl9	17329	2-Cell Transient	0.98821
DBTMEE:0005412	Cxcl10	15945	2-Cell Transient	0.98118
DBTMEE:0005413	Cxcl11	56066	2-Cell Transient	0.99074
DBTMEE:0020867	Tmem150c	231503	2-Cell Transient	0.98174
DBTMEE:0015682	P2rx2	231602	2-Cell Transient	0.99272
DBTMEE:0018670	Sez6l	56747	2-Cell Transient	0.98299
DBTMEE:0020832	Tmem119	231633	2-Cell Transient	0.8941
DBTMEE:0010159	Hnf1a	21405	2-Cell Transient	0.98782
DBTMEE:0021841	Unc119b	106840	2-Cell Transient	0.99171
DBTMEE:0016062	Pebp1	23980	2-Cell Transient	0.8942
DBTMEE:0021212	Tpcn1	252972	2-Cell Transient	0.97305
DBTMEE:0017414	Rad9b	231724	2-Cell Transient	0.94392
DBTMEE:0003876	Camkk2	207565	2-Cell Transient	0.9497
DBTMEE:0009558	Gpr81	243270	2-Cell Transient	0.99817
DBTMEE:0018330	Sbno1	243272	2-Cell Transient	0.9795
DBTMEE:0017817	Rilpl2	80291	2-Cell Transient	0.99103
DBTMEE:0013735	Ncf1	17969	2-Cell Transient	0.9963
DBTMEE:0004783	Cldn13	57255	2-Cell Transient	0.96909
DBTMEE:0007770	Fzd9	14371	2-Cell Transient	0.98741
DBTMEE:0007547	Fkbp6	94244	2-Cell Transient	0.97668
DBTMEE:0015593	Orai2	269717	2-Cell Transient	0.99
DBTMEE:0018636	Serpine1	18787	2-Cell Transient	0.99635
DBTMEE:0021356	Trim56	384309	2-Cell Transient	0.98917
DBTMEE:0008055	Gjc3	118446	2-Cell Transient	0.96926
DBTMEE:0019578	Snx8	231834	2-Cell Transient	0.95677
DBTMEE:0015767	Papolb	56522	2-Cell Transient	0.99817
DBTMEE:0021936	Usp42	76800	2-Cell Transient	0.88942
DBTMEE:0002321	Aimp2	231872	2-Cell Transient	0.96032
DBTMEE:0020843	Tmem130	243339	2-Cell Transient	0.98941
DBTMEE:0008961	Gm4871	231885	2-Cell Transient	0.99823
DBTMEE:0005538	Cyp3a44	337924	2-Cell Transient	0.96928
DBTMEE:0017953	Rnf6	74132	2-Cell Transient	0.99758
DBTMEE:0005000	Col1a2	12843	2-Cell Transient	0.8783
DBTMEE:0003697	C1galt1	94192	2-Cell Transient	0.94553
DBTMEE:0012430	Mios	252875	2-Cell Transient	0.96
DBTMEE:0007702	Fscn3	56223	2-Cell Transient	0.97634
DBTMEE:0014191	Nrf1	18181	2-Cell Transient	0.96863
DBTMEE:0000258	1700025E21Rik	75647	2-Cell Transient	0.98704
DBTMEE:0003849	Cald1	109624	2-Cell Transient	0.99851
DBTMEE:0020044	Stra8	20899	2-Cell Transient	0.94527
DBTMEE:0021543	Ttc26	264134	2-Cell Transient	0.99575
DBTMEE:0021752	Ubn2	320538	2-Cell Transient	0.86234
DBTMEE:0020429	Tbxas1	21391	2-Cell Transient	0.99562
DBTMEE:0017325	Rab19	19331	2-Cell Transient	0.95581
DBTMEE:0020351	Tas2r137	574417	2-Cell Transient	0.93444
DBTMEE:0020146	Sva	20939	2-Cell Transient	0.91814
DBTMEE:0015093	Olfr448	258270	2-Cell Transient	0.96911
DBTMEE:0000102	1600015I10Rik	69761	2-Cell Transient	0.97992
DBTMEE:0004040	Ccdc126	57895	2-Cell Transient	0.99806
DBTMEE:0007149	Fam190a	232035	2-Cell Transient	0.96338
DBTMEE:0006600	Eif2ak3	13666	2-Cell Transient	0.99749
DBTMEE:0004346	Cd8b1	12526	2-Cell Transient	0.9691
DBTMEE:0018699	Sftpb	20388	2-Cell Transient	0.96926
DBTMEE:0008750	Mtrnr2l	100463512	2-Cell Transient	0.99192
DBTMEE:0011499	Lbx2	16815	2-Cell Transient	0.99277
DBTMEE:0000127	1700003E16Rik	71837	2-Cell Transient	0.99072
DBTMEE:0002430	Alms1	236266	2-Cell Transient	0.88525
DBTMEE:0002969	Asprv1	67855	2-Cell Transient	0.99556
DBTMEE:0001211	4930590J08Rik	381798	2-Cell Transient	0.99057
DBTMEE:0016776	Ppp4r2	232314	2-Cell Transient	0.93955
DBTMEE:0005190	Creld1	171508	2-Cell Transient	0.97054
DBTMEE:0020360	Tatdn2	381801	2-Cell Transient	0.9705
DBTMEE:0003887	Cand2	67088	2-Cell Transient	0.98015
DBTMEE:0005414	Cxcl12	20315	2-Cell Transient	0.96503
DBTMEE:0003817	Cacna2d4	319734	2-Cell Transient	0.96459
DBTMEE:0002309	Aicda	11628	2-Cell Transient	0.97609
DBTMEE:0004822	Clec4a1	269799	2-Cell Transient	0.96574
DBTMEE:0013303	Mrpl51	66493	2-Cell Transient	0.93832
DBTMEE:0021979	Vamp1	22317	2-Cell Transient	0.90046
DBTMEE:0014198	Nrip2	60345	2-Cell Transient	0.96911
DBTMEE:0020345	Tas2r129	387354	2-Cell Transient	0.96907
DBTMEE:0019249	Slco1b2	28253	2-Cell Transient	0.97749
DBTMEE:0009418	Golt1b	66964	2-Cell Transient	0.96135
DBTMEE:0017511	Rassf8	71323	2-Cell Transient	0.95627
DBTMEE:0020023	Stk38l	232533	2-Cell Transient	0.98958
DBTMEE:0003502	Bicd1	12121	2-Cell Transient	0.97964
DBTMEE:0020603	Tfpi2	21789	2-Cell Transient	0.96045
DBTMEE:0006079	Dlx5	13395	2-Cell Transient	0.94397
DBTMEE:0001884	Aass	30956	2-Cell Transient	0.96299
DBTMEE:0022797	Zc3hav1l	209032	2-Cell Transient	0.9883
DBTMEE:0022796	Zc3hav1	78781	2-Cell Transient	0.95208
DBTMEE:0000392	1700074P13Rik	73481	2-Cell Transient	0.96909
DBTMEE:0014058	Nod1	107607	2-Cell Transient	0.99298
DBTMEE:0007822	Gadd45a	13197	2-Cell Transient	0.97292
DBTMEE:0018008	Rpia	19895	2-Cell Transient	0.81524
DBTMEE:0017853	Rmnd5a	68477	2-Cell Transient	0.95895
DBTMEE:0004893	Cml2	93673	2-Cell Transient	0.91254
DBTMEE:0002603	Antxr1	69538	2-Cell Transient	0.98065
DBTMEE:0017362	Rab43	69834	2-Cell Transient	0.99861
DBTMEE:0008012	Ghrl	58991	2-Cell Transient	0.92571
DBTMEE:0003504	Bid	12122	2-Cell Transient	0.99498
DBTMEE:0002687	Apobec1	11810	2-Cell Transient	0.95831
DBTMEE:0007954	Gdf3	14562	2-Cell Transient	0.94662
DBTMEE:0016103	Pex5	19305	2-Cell Transient	0.94342
DBTMEE:0008989	Gm5077	317677	2-Cell Transient	0.98791
DBTMEE:0011441	Lag3	16768	2-Cell Transient	0.99191
DBTMEE:0005060	Cops7a	26894	2-Cell Transient	0.9689
DBTMEE:0013724	Ncapd2	68298	2-Cell Transient	0.99036
DBTMEE:0006385	Dyrk4	101320	2-Cell Transient	0.98242
DBTMEE:0011251	Klra5	16636	2-Cell Transient	0.96912
DBTMEE:0011244	Klra2	16633	2-Cell Transient	0.90413
DBTMEE:0006336	Dusp16	70686	2-Cell Transient	0.97888
DBTMEE:0010491	Igbp1b	50540	2-Cell Transient	0.96658
DBTMEE:0016412	Plcz1	114875	2-Cell Transient	0.96591
DBTMEE:0003829	Cacng8	81905	2-Cell Transient	0.96906
DBTMEE:0020141	Suv420h2	232811	2-Cell Transient	0.99303
DBTMEE:0020911	Tmem190	78052	2-Cell Transient	0.99908
DBTMEE:0021922	Usp29	57775	2-Cell Transient	0.97293
DBTMEE:0022308	Vmn2r37	22305	2-Cell Transient	0.96937
DBTMEE:0022945	Zfp324	243834	2-Cell Transient	0.99691
DBTMEE:0018951	Slc1a5	20514	2-Cell Transient	0.95975
DBTMEE:0016524	Pnmal2	434128	2-Cell Transient	0.99763
DBTMEE:0004491	Ceacam14	67084	2-Cell Transient	0.97374
DBTMEE:0012425	Mill2	243864	2-Cell Transient	0.95757
DBTMEE:0016142	Pglyrp1	21946	2-Cell Transient	0.98865
DBTMEE:0010747	Irf2bp1	272359	2-Cell Transient	0.99746
DBTMEE:0018196	Rtn2	20167	2-Cell Transient	0.98857
DBTMEE:0010761	Irgq	210146	2-Cell Transient	0.97279
DBTMEE:0016984	Prr19	623131	2-Cell Transient	0.97856
DBTMEE:0005483	Cyp2a5	13087	2-Cell Transient	0.96915
DBTMEE:0018645	Sertad1	55942	2-Cell Transient	0.99886
DBTMEE:0021567	Ttc9b	73032	2-Cell Transient	0.96029
DBTMEE:0006589	Eid2	386655	2-Cell Transient	0.99805
DBTMEE:0006590	Eid2b	434156	2-Cell Transient	0.97928
DBTMEE:0007366	Fbxo27	233040	2-Cell Transient	0.93283
DBTMEE:0009161	Gm6537	100504112	2-Cell Transient	0.97303
DBTMEE:0006232	Dpf1	29861	2-Cell Transient	0.97429
DBTMEE:0022938	Zfp30	22693	2-Cell Transient	0.99809
DBTMEE:0016936	Prodh2	56189	2-Cell Transient	0.96925
DBTMEE:0000957	4930433I11Rik	243944	2-Cell Transient	0.93921
DBTMEE:0009302	Gm9268	668612	2-Cell Transient	0.96934
DBTMEE:0023200	Zfp936	668620	2-Cell Transient	0.95584
DBTMEE:0006456	EU599041	100170401	2-Cell Transient	0.99611
DBTMEE:0023120	Zfp719	210105	2-Cell Transient	0.97678
DBTMEE:0011221	Klk1b27	16619	2-Cell Transient	0.99797
DBTMEE:0011222	Klk1b3	18050	2-Cell Transient	0.99148
DBTMEE:0018767	Shank1	243961	2-Cell Transient	0.95497
DBTMEE:0017174	Pth2	114640	2-Cell Transient	0.96908
DBTMEE:0010936	Kcna7	16495	2-Cell Transient	0.99386
DBTMEE:0021626	Tulp2	56734	2-Cell Transient	0.96244
DBTMEE:0005744	Dbp	13170	2-Cell Transient	0.98359
DBTMEE:0009723	Gtf2h1	14884	2-Cell Transient	0.95778
DBTMEE:0011547	Ldhc	16833	2-Cell Transient	0.99878
DBTMEE:0013250	Mrgprb8	404240	2-Cell Transient	0.96917
DBTMEE:0022031	H47	109815	2-Cell Transient	0.99361
DBTMEE:0013310	Mrps11	67994	2-Cell Transient	0.92564
DBTMEE:0014975	Olfr291	258410	2-Cell Transient	0.96908
DBTMEE:0022353	Vmn2r79	621430	2-Cell Transient	0.96934
DBTMEE:0007765	Fzd4	14366	2-Cell Transient	0.99556
DBTMEE:0017339	Rab30	75985	2-Cell Transient	0.9958
DBTMEE:0007134	Fam181b	58238	2-Cell Transient	0.9691
DBTMEE:0010695	Ints4	101861	2-Cell Transient	0.86542
DBTMEE:0007965	Gdpd4	233537	2-Cell Transient	0.95459
DBTMEE:0013407	Mtap6	17760	2-Cell Transient	0.96144
DBTMEE:0002894	Arrb1	109689	2-Cell Transient	0.97642
DBTMEE:0021792	Ucp3	22229	2-Cell Transient	0.95579
DBTMEE:0007111	Fam168a	319604	2-Cell Transient	0.98782
DBTMEE:0015213	Olfr584	259056	2-Cell Transient	0.92021
DBTMEE:0021335	Trim34a	94094	2-Cell Transient	0.98588
DBTMEE:0015283	Olfr665	258810	2-Cell Transient	0.96908
DBTMEE:0004174	Cckbr	12426	2-Cell Transient	0.96933
DBTMEE:0012407	Mical2	320878	2-Cell Transient	0.97345
DBTMEE:0012409	Micalcl	100504195	2-Cell Transient	0.96933
DBTMEE:0017504	Rassf10	78748	2-Cell Transient	0.9867
DBTMEE:0016599	Polr3e	26939	2-Cell Transient	0.96097
DBTMEE:0017522	Rbbp6	19647	2-Cell Transient	0.99549
DBTMEE:0002735	Aqp8	11833	2-Cell Transient	0.88737
DBTMEE:0018328	Sbk1	104175	2-Cell Transient	0.90883
DBTMEE:0010809	Itgal	16408	2-Cell Transient	0.97265
DBTMEE:0016198	Phkg2	68961	2-Cell Transient	0.97679
DBTMEE:0018656	Setd1a	233904	2-Cell Transient	0.93487
DBTMEE:0010810	Itgam	16409	2-Cell Transient	0.95029
DBTMEE:0010155	Hmx2	15372	2-Cell Transient	0.94503
DBTMEE:0011274	Kndc1	76484	2-Cell Transient	0.9969
DBTMEE:0006275	Drd4	13491	2-Cell Transient	0.96909
DBTMEE:0007478	Fgf15	14170	2-Cell Transient	0.98621
DBTMEE:0011568	Leng1		2-Cell Transient	0.98322
DBTMEE:0020788	Tmc4		2-Cell Transient	0.98322
DBTMEE:0008507	Gm14548		2-Cell Transient	0.99346
DBTMEE:0016304	Pira1		2-Cell Transient	0.99346
DBTMEE:0016305	Pira11		2-Cell Transient	0.99346
DBTMEE:0016306	Pira2		2-Cell Transient	0.99346
DBTMEE:0011628	Lilra6		2-Cell Transient	0.99346
DBTMEE:0016309	Pira7		2-Cell Transient	0.99346
DBTMEE:0020866	Tmem150b	330460	2-Cell Transient	0.98503
DBTMEE:0010545	Il11	16156	2-Cell Transient	0.91919
DBTMEE:0022237	Vmn1r83	171243	2-Cell Transient	0.96915
DBTMEE:0013626	Mzf1	109889	2-Cell Transient	0.97808
DBTMEE:0014382	Obox3	246791	2-Cell Transient	0.99906
DBTMEE:0003759	C5ar1	12273	2-Cell Transient	0.96933
DBTMEE:0016703	Ppm1n	232941	2-Cell Transient	0.99961
DBTMEE:0004313	Cd3eap	70333	2-Cell Transient	0.99424
DBTMEE:0017648	Relb	19698	2-Cell Transient	0.94858
DBTMEE:0003412	Bcam	57278	2-Cell Transient	0.94344
DBTMEE:0004493	Ceacam16	330483	2-Cell Transient	0.96162
DBTMEE:0004495	Ceacam19	319930	2-Cell Transient	0.96554
DBTMEE:0000156	1700008P20Rik	69301	2-Cell Transient	0.96139
DBTMEE:0020555	Tex101	56746	2-Cell Transient	0.99778
DBTMEE:0005481	Cyp2a22	233005	2-Cell Transient	0.96563
DBTMEE:0010840	Itpkc	233011	2-Cell Transient	0.96987
DBTMEE:0019772	Spnb4	80297	2-Cell Transient	0.95162
DBTMEE:0012268	Med29	67224	2-Cell Transient	0.96758
DBTMEE:0003735	C330005M16Rik	101744	2-Cell Transient	0.99328
DBTMEE:0019793	Spred3	101809	2-Cell Transient	0.98402
DBTMEE:0003975	Catsperg1	320225	2-Cell Transient	0.98338
DBTMEE:0003976	Catsperg2	76718	2-Cell Transient	0.98519
DBTMEE:0023044	Zfp566	72556	2-Cell Transient	0.99042
DBTMEE:0011749	Lrfn3	233067	2-Cell Transient	0.99805
DBTMEE:0011132	Kirrel2	243911	2-Cell Transient	0.97255
DBTMEE:0006908	Etv2	14008	2-Cell Transient	0.98779
DBTMEE:0007460	Ffar1	233081	2-Cell Transient	0.96908
DBTMEE:0004284	Cd22	12483	2-Cell Transient	0.96952
DBTMEE:0004713	Chst8	68947	2-Cell Transient	0.99857
DBTMEE:0003723	C230052I12Rik	101831	2-Cell Transient	0.97988
DBTMEE:0004211	Ccne1	12447	2-Cell Transient	0.9873
DBTMEE:0001340	4933421I07Rik	71162	2-Cell Transient	0.9692
DBTMEE:0010516	Iglon5	210094	2-Cell Transient	0.96921
DBTMEE:0016998	Prrg2	65116	2-Cell Transient	0.94064
DBTMEE:0009093	Gm581	100039953	2-Cell Transient	0.93676
DBTMEE:0006051	Dkkl1	50722	2-Cell Transient	0.96712
DBTMEE:0007738	Fut2	14344	2-Cell Transient	0.97791
DBTMEE:0018476	Sec1	56546	2-Cell Transient	0.99432
DBTMEE:0020107	Sult2b1	54200	2-Cell Transient	0.99224
DBTMEE:0010973	Kcnj11	16514	2-Cell Transient	0.96925
DBTMEE:0021219	Tph1	21990	2-Cell Transient	0.96915
DBTMEE:0013245	Mrgprb1	233231	2-Cell Transient	0.9691
DBTMEE:0013257	Mrgprx2	243978	2-Cell Transient	0.99321
DBTMEE:0007294	Fancf	100040608	2-Cell Transient	0.99593
DBTMEE:0011149	Klf13	50794	2-Cell Transient	0.99802
DBTMEE:0013200	Mphosph10	67973	2-Cell Transient	0.95887
DBTMEE:0012277	Mef2a	17258	2-Cell Transient	0.97205
DBTMEE:0020200	Synm	233335	2-Cell Transient	0.99604
DBTMEE:0002899	Arrdc4	66412	2-Cell Transient	0.99693
DBTMEE:0020144	Sv2b	64176	2-Cell Transient	0.99244
DBTMEE:0016455	Plin1	103968	2-Cell Transient	0.98388
DBTMEE:0012307	Mesp1	17292	2-Cell Transient	0.96909
DBTMEE:0014025	Nmb	68039	2-Cell Transient	0.98268
DBTMEE:0015918	Pcf11	74737	2-Cell Transient	0.9987
DBTMEE:0000834	4632434I11Rik	74041	2-Cell Transient	0.9669
DBTMEE:0020673	Thrsp	21835	2-Cell Transient	0.96911
DBTMEE:0013166	Mogat2	233549	2-Cell Transient	0.96909
DBTMEE:0015695	P2ry6	233571	2-Cell Transient	0.96912
DBTMEE:0010569	Il18bp	16068	2-Cell Transient	0.94277
DBTMEE:0004686	Chrna10	504186	2-Cell Transient	0.99775
DBTMEE:0015311	Olfr695	258591	2-Cell Transient	0.96918
DBTMEE:0015313	Olfr698	258595	2-Cell Transient	0.9871
DBTMEE:0018440	Scube2	56788	2-Cell Transient	0.99691
DBTMEE:0020218	Syt17	110058	2-Cell Transient	0.99725
DBTMEE:0007948	Gde1	56209	2-Cell Transient	0.97852
DBTMEE:0000587	2310008H09Rik	66356	2-Cell Transient	0.96387
DBTMEE:0023265	Zkscan2	210162	2-Cell Transient	0.99095
DBTMEE:0010601	Il27	246779	2-Cell Transient	0.99801
DBTMEE:0019765	Spn	20737	2-Cell Transient	0.99871
DBTMEE:0023078	Zfp629	320683	2-Cell Transient	0.99397
DBTMEE:0023097	Zfp668	244219	2-Cell Transient	0.99142
DBTMEE:0013066	Mki67	17345	2-Cell Transient	0.8767
DBTMEE:0001590	9430038I01Rik	77252	2-Cell Transient	0.97113
DBTMEE:0013392	Msx3	17703	2-Cell Transient	0.96915
DBTMEE:0003864	Caly	68566	2-Cell Transient	0.97715
DBTMEE:0005862	Deaf1	54006	2-Cell Transient	0.95922
DBTMEE:0004523	Cend1	57754	2-Cell Transient	0.98964
DBTMEE:0021434	Trpm5	56843	2-Cell Transient	0.9694
DBTMEE:0021119	Tnfrsf22	79202	2-Cell Transient	0.97867
DBTMEE:0006921	Evi5l	213027	2-Cell Transient	0.75613
DBTMEE:0008477	Gm14378	100044509	2-Cell Transient	0.97673
DBTMEE:0001012	4930467E23Rik	626415	2-Cell Transient	0.96934
DBTMEE:0011021	Kcnu1	16532	2-Cell Transient	0.99003
DBTMEE:0016752	Ppp2cb	19053	2-Cell Transient	0.97672
DBTMEE:0009720	Gtf2e2	68153	2-Cell Transient	0.95215
DBTMEE:0006347	Dusp4	319520	2-Cell Transient	0.94862
DBTMEE:0016740	Ppp1r3b	244416	2-Cell Transient	0.9278
DBTMEE:0002124	Adam25	23793	2-Cell Transient	0.96934
DBTMEE:0016010	Pdgfrl	68797	2-Cell Transient	0.99312
DBTMEE:0011719	Lpar2	53978	2-Cell Transient	0.92793
DBTMEE:0014168	Nr2c2ap	75692	2-Cell Transient	0.95828
DBTMEE:0011792	Lrrc25	211228	2-Cell Transient	0.99731
DBTMEE:0009742	Gtpbp3	70359	2-Cell Transient	0.9936
DBTMEE:0019045	Slc27a1	26457	2-Cell Transient	0.96539
DBTMEE:0021546	Ttc29	73301	2-Cell Transient	0.94722
DBTMEE:0016546	Podnl1	244550	2-Cell Transient	0.94851
DBTMEE:0020908	Tmem188	382030	2-Cell Transient	0.97586
DBTMEE:0018182	Rspry1	67610	2-Cell Transient	0.94776
DBTMEE:0002845	Arl2bp	107566	2-Cell Transient	0.92417
DBTMEE:0013120	Mmp15	17388	2-Cell Transient	0.9501
DBTMEE:0008031	Gins3	78833	2-Cell Transient	0.95183
DBTMEE:0004585	Ces4a	234677	2-Cell Transient	0.98311
DBTMEE:0005320	Ctcf	13018	2-Cell Transient	0.91157
DBTMEE:0013890	Nfat5	54446	2-Cell Transient	0.99455
DBTMEE:0023164	Zfp821	75871	2-Cell Transient	0.94056
DBTMEE:0019935	St3gal2	20444	2-Cell Transient	0.98939
DBTMEE:0016036	Pdpr	319518	2-Cell Transient	0.97808
DBTMEE:0022863	Zfp1	22640	2-Cell Transient	0.96673
DBTMEE:0003306	BC048644	407789	2-Cell Transient	0.99319
DBTMEE:0000835	4732415M23Rik	320869	2-Cell Transient	0.97013
DBTMEE:0001290	4933403G14Rik	74393	2-Cell Transient	0.97053
DBTMEE:0005382	Ctxn1	330695	2-Cell Transient	0.83872
DBTMEE:0006555	Efnb2	13642	2-Cell Transient	0.87679
DBTMEE:0002762	Arglu1	234023	2-Cell Transient	0.99973
DBTMEE:0010763	Irs2	384783	2-Cell Transient	0.99343
DBTMEE:0000193	1700016D06Rik	76413	2-Cell Transient	0.99136
DBTMEE:0001864	AY761185	100503970	2-Cell Transient	0.99375
DBTMEE:0002114	Adam18	13524	2-Cell Transient	0.89227
DBTMEE:0004691	Chrna6	11440	2-Cell Transient	0.96922
DBTMEE:0007082	Fam149a	212326	2-Cell Transient	0.95709
DBTMEE:0002562	Ankrd37	654824	2-Cell Transient	0.95855
DBTMEE:0012147	Mau2	74549	2-Cell Transient	0.91052
DBTMEE:0017705	Rfxank	19727	2-Cell Transient	0.95109
DBTMEE:0019027	Slc25a42	73095	2-Cell Transient	0.99888
DBTMEE:0016482	Plvap	84094	2-Cell Transient	0.998
DBTMEE:0014341	Nxnl1	234404	2-Cell Transient	0.96921
DBTMEE:0020905	Tmem184c	234463	2-Cell Transient	0.97834
DBTMEE:0009083	Gm5741	100503710	2-Cell Transient	0.96906
DBTMEE:0003987	Cbln1	12404	2-Cell Transient	0.96499
DBTMEE:0016466	Pllp	67801	2-Cell Transient	0.99651
DBTMEE:0004918	Cngb1	333329	2-Cell Transient	0.99414
DBTMEE:0007983	Gfod2	70575	2-Cell Transient	0.99454
DBTMEE:0006230	Dpep2	319446	2-Cell Transient	0.99385
DBTMEE:0019360	Smpd3	58994	2-Cell Transient	0.96751
[truncated: 15,233 more rows]

## Sheet: ora_up_set_2cWT-set_2cKO
Figure 2–Source Data 1. Overrepresentation Analysis (ORA) with DBTMEE Categories. ORA was performed using DBTMEE-defined (Park et al., 2015) gene sets as in Sakashita et al. (Sakashita et al., 2023) and DEGs up/down regulated from the pairwise comparisons. The analysis was run using function enricher from R package ClusterProfiler (v4.14.4). Results are shown only for sets with significant enrich…
ID	Description	GeneRatio	BgRatio	RichFactor	FoldEnrichment	zScore	pvalue	p.adjust	qvalue	geneID	Count
MGA	MGA	56/169	1721/12760	0.0325392	2.45681	7.52747	3.91488e-11	3.91488e-10	2.47256e-10	Ccdc43/Rrp1/Zmpste24/Slc6a6/Ipo4/Rpl3/Nipal1/Eif3g/Acadm/Rps17/Fxn/Eprs1/Cln8/Spr/Psat1/Fam136a/Pes1/Rpl26/Crxos/Rpl31/Tfrc/Map1lc3b/Utp14a/Chrac1/Rrp15/Ccdc154/Eif3l/Rps20/Eif2s1/Ccdc59/Rpl36/Uqcrc1/Rbm41/Rps3/Rbfa/Mrpl39/Emc4/Tufm/Ipo11/Zfp13/Wdr18/Tsr2/Nol7/Rabggtb/Idh3g/Slc25a41/Skic8/Tsen15/Kri1/Uqcc3/Ndor1/Gnptab/Mast3/Rps9/Esrrb/Yars1	56
4-Cell Transient	4-Cell Transient	31/169	968/12760	0.0320248	2.41797	5.31657	3.41444e-06	1.70722e-05	1.07824e-05	Galk1/Aimp1/Azin1/Phldb3/Cripto/Mthfsd/Eif3d/BC048679/Plaur/Itpka/Ddah1/Zan/Cmtm7/Shroom1/Sfxn1/Ckmt1/Lrpap1/Enpp3/Esrp2/Trp53i11/Sec14l4/Srsf3/Rpl32l/Hand1/Lgals8/Liph/Grin1/Sox21/Agpat4/Gata6/Rpl22	31
Maternal to MGA	Maternal to MGA	23/169	928/12760	0.0247845	1.8713	3.19327	0.00261818	0.00872726	0.00551196	Cyth2/1700037C18Rik/Prpf31/Ccdc17/Crnkl1/Selenbp1/Krt222/Nol12/Morn1/Lars1/Cox16/Mccc1/Mrpl12/Trir/Ncln/Il17rc/Trip10/Acadvl/Psmc3/Cst3/Gtf2h2/Cyp2t4/Gps2	23
Major ZGA	Major ZGA	28/169	1406/12760	0.0199147	1.50362	2.3192	0.0179313	0.0448282	0.0283125	Alpl/Rpl11/Rpl41/Klc3/Gtf2f1/Tcp1/D8Ertd738e/Adrm1/Paf1/Dimt1/Dnttip2/Cadm4/Ddx27/Cacna1b/Mt1/Ppp1r16b/Tomm5/P4ha3/Zfp317/Masp2/Rsrc2/Flywch2/Rps8/Puf60/Bop1/Rps7/Itch/Sdad1	28
Maternal to ZGA	Maternal to ZGA	2/169	234/12760	0.00854701	0.645324	-0.634387	0.819832	1	0.631579	Rrp1b/Mrpl28	2
1-Cell Transient	1-Cell Transient	1/169	200/12760	0.005	0.377515	-1.02795	0.931967	1	0.631579	Rtbdn	1
2-Cell Transient	2-Cell Transient	10/169	1142/12760	0.00875657	0.661147	-1.39027	0.943769	1	0.631579	Prss42/Mxi1/Muc13/Zmynd12/Tgs1/Srsf1/Rpl10l/Serpine1/Ints4/Gm9	10
Minor ZGA to MGA	Minor ZGA to MGA	3/169	500/12760	0.006	0.453018	-1.44555	0.964171	1	0.631579	Eef1e1/Acsl6/Trim2	3
Maternal RNA	Maternal RNA	8/169	2815/12760	0.00284192	0.214573	-5.46845	1	1	0.631579	Cdc42ep3/Tomt/Mrps35/Cfap69/Kcng1/Fabp12/Pip5k1b/Eln	8
Minor ZGA	Minor ZGA	7/169	2847/12760	0.00245873	0.185641	-5.71121	1	1	0.631579	Gabra5/Pitpnm1/Traf6/Nkx6-1/4932414N04Rik/Prrx1/Sfswap	7

## Sheet: ora_down_set_2cWT-set_2cKO
Figure 2–Source Data 1. Overrepresentation Analysis (ORA) with DBTMEE Categories. ORA was performed using DBTMEE-defined (Park et al., 2015) gene sets as in Sakashita et al. (Sakashita et al., 2023) and DEGs up/down regulated from the pairwise comparisons. The analysis was run using function enricher from R package ClusterProfiler (v4.14.4). Results are shown only for sets with significant enrich…
ID	Description	GeneRatio	BgRatio	RichFactor	FoldEnrichment	zScore	pvalue	p.adjust	qvalue	geneID	Count
Minor ZGA to MGA	Minor ZGA to MGA	11/118	500/12760	0.022	2.37898	3.03907	0.00655895	0.0354456	0.0261178	Tpm4/Usp17lc/Utrn/Anp32a/Csrp1/Ap3b2/Pou5f1/Zscan4c/Rab3il1/Rarb/Map3k20	11
4-Cell Transient	4-Cell Transient	17/118	968/12760	0.017562	1.89908	2.81113	0.00762409	0.0354456	0.0261178	Dgkz/Pramel16/Ovol1/Pramel20/Eif1ad7/Cldn7/Cdc6/Klf10/Arhgap1/Erlin2/Eif4a3l1/Gsto1/Slc29a3/Nid1/Pros1/Bend4/Man2b1	17
1-Cell Transient	1-Cell Transient	6/118	200/12760	0.03	3.24407	3.09028	0.0106337	0.0354456	0.0261178	H1f3/Lin28a/Nadk/Klhl31/Or6c5c/Mt4	6
Maternal RNA	Maternal RNA	32/118	2815/12760	0.0113677	1.22925	1.33103	0.112893	0.282233	0.207961	Dcp1a/Gbe1/Fbxo3/Fat4/Ermp1/Chrdl1/Gldn/Cdkn2c/Nrap/Snw1/Ldb1/Lsm14b/Pcbd2/C4b/Hhla1/Lurap1l/D6Ertd527e/Tbc1d8/Slc7a8/Trpc4/Hexd/Tenm3/Atp6v0a2/Zfp174/Myo1a/Gstm5/Herpud2/Ptk2b/Selenow/Rdx/G6pc3/Hpd	32
Maternal to MGA	Maternal to MGA	11/118	928/12760	0.0118534	1.28178	0.861184	0.23879	0.477581	0.351902	Dync2h1/Slc43a3/Aaas/Cox6c/Lamp1/Vamp3/Lig1/Ift172/Slc28a3/Amdhd2/Lrrn4	11
Maternal to ZGA	Maternal to ZGA	3/118	234/12760	0.0128205	1.38635	0.576273	0.36819	0.61365	0.452163	Map4k5/Sema3c/Trpt1	3
Minor ZGA	Minor ZGA	24/118	2847/12760	0.00842993	0.911575	-0.517139	0.730935	0.99988	0.736753	Fyco1/Akap12/Smco4/Serpinb3a/Arhgef26/Abtb1/Patj/Sec24d/Dennd4c/Cnot7/Sirpa/Tubg2/Eya4/Med28/Sox1/Morn4/Rnf38/Peg10/Psme4/Ankrd17/Ifit1bl2/Or13p8/Hpse/Asb4	24
MGA	MGA	9/118	1721/12760	0.00522952	0.565497	-1.87223	0.983729	0.99988	0.736753	Mfsd1/Zfp352/Jund/Slc66a2/Ercc4/Plbd1/Triml2/Tbl1x/Fgf1	9
2-Cell Transient	2-Cell Transient	2/118	1142/12760	0.00175131	0.189379	-2.77349	0.999811	0.99988	0.736753	Ankrd22/Col1a1	2
Major ZGA	Major ZGA	3/118	1406/12760	0.00213371	0.23073	-2.95419	0.99988	0.99988	0.736753	Acot6/Dmrta2/Ubap2l	3

## Sheet: ora_up_set_8cWT-set_8cKO
Figure 2–Source Data 1. Overrepresentation Analysis (ORA) with DBTMEE Categories. ORA was performed using DBTMEE-defined (Park et al., 2015) gene sets as in Sakashita et al. (Sakashita et al., 2023) and DEGs up/down regulated from the pairwise comparisons. The analysis was run using function enricher from R package ClusterProfiler (v4.14.4). Results are shown only for sets with significant enrich…
ID	Description	GeneRatio	BgRatio	RichFactor	FoldEnrichment	zScore	pvalue	p.adjust	qvalue	geneID	Count
4-Cell Transient	4-Cell Transient	32/249	968/12760	0.0330579	1.69405	3.16881	0.0022779	0.022779	0.0191824	Tbx3/Actb/Enah/Gsc/Kif13b/Slc24a5/Hemk1/Cthrc1/Fasn/Plk5/Eno2/Nkx2-3/Ccng1/Ralb/Zbtb42/Dnm1/Rp2/Itpkb/Vamp2/Ifngr2/Xpnpep2/Antkmt/Sall1/Serinc2/Mpzl2/Kcnf1/Stat5b/Shisal2b/Acyp2/Pla2g10/Prps2/Fstl3	32
Maternal RNA	Maternal RNA	67/249	2815/12760	0.0238011	1.21969	1.86251	0.0393307	0.196653	0.165603	Adgrg1/Bscl2/Hsp90aa1/Txnrd1/Kcnn4/Dock3/Txndc2/Ephb4/Cdc42ep3/Selenow/Cnn3/Cog6/Hsbp1/Cpne7/Acd/Reep4/Pkp2/Men1/Gli2/Cacna1e/As3mt/Akr1b8/Prkag2/Ap3m2/Ttc7b/Jam3/1700030K09Rik/Fbxw14/Nfkbie/Micu3/Tcn2/Ip6k2/Pkm/Asap2/Prdm11/Sema3d/Zfp418/Arhgef10/Lama5/Lect2/Cdc123/Serinc4/Ccn6/Mpg/Scly/2810408A11Rik/Pcbp4/Ttc41/Spns3/Fhod1/Ankrd48/Mrtfa/Zfp362/Pou2f1/Spef2/Atp8a2/Or10d5j/Syt2/Ift46/Trim68/H2-Oa…	67
Minor ZGA	Minor ZGA	64/249	2847/12760	0.0224798	1.15198	1.29787	0.112156	0.373853	0.314823	Map2k4/Emp2/Ggct/Ddx59/Prlr/Gnb1/Gnb2/Socs1/Ypel1/Triobp/Antxr2/Atp10b/Plekha3/Epb41l2/Flrt1/Gnas/Sh2d4b/Bhlhe41/Gm7694/Kdm6b/Thsd7a/Nfix/Lgi2/Nek7/Prkra/Ttll7/Lrrc1/AI987944/Zfp423/Galc/B3gat2/Exoc4/Dennd6a/Acot3/Sgcd/Foxo3/Usp21/Chac1/Plekhb1/Tent5d/H2bc27/Nol4l/Armc2/Dnai2/Usp43/Cat/Akt2/Mex3a/Sars1/Rnf19a/Klf7/Actr3b/Kcnq4/Ryk/Pbx2/Nudcd3/Lims2/Elovl7/Adamts4/Cfap97/Fryl/Zfp185/Sri/Fermt2	64
Maternal to MGA	Maternal to MGA	22/249	928/12760	0.0237069	1.21486	0.958874	0.198616	0.49654	0.418139	Vps13d/Sema4b/Slc28a3/Bcl11b/Mlf2/Lpgat1/Trip10/Krt7/Tuba1c/Plxnb2/Tars3/Eps8l2/Asb3/Snx21/Tuba1b/Megf8/Smim29/Txn1/Slc7a7/Hint3/Pierce1/Pxylp1	22
1-Cell Transient	1-Cell Transient	5/249	200/12760	0.025	1.28112	0.565302	0.351805	0.642679	0.541203	Dut/Sox2/Arl5c/Clcn1/Helt	5
Minor ZGA to MGA	Minor ZGA to MGA	11/249	500/12760	0.022	1.12739	0.409954	0.385607	0.642679	0.541203	Usp24/Actn4/Macroh2a1/Myl6b/Pou5f1/Rarb/Marcks/Washc2/Anp32a/Rfk/Samd4b	11
Maternal to ZGA	Maternal to ZGA	3/249	234/12760	0.0128205	0.656987	-0.747093	0.839022	0.999843	0.841973	Eva1b/Prap1/Tmem116	3
2-Cell Transient	2-Cell Transient	14/249	1142/12760	0.0122592	0.628222	-1.85743	0.981071	0.999843	0.841973	Smad7/Gpr50/Ptges/Scd1/Pla2g5/Gm9/Pcsk1n/Kcnu1/Syngr2/P3h2/Epha2/Rap2a/Gsdmd/Dkkl1	14
MGA	MGA	19/249	1721/12760	0.0110401	0.565749	-2.7323	0.99875	0.999843	0.841973	Zfp599/Klf4/Psap/Trim14/Eomes/Lta4h/4833439L19Rik/Cd19/Mkrn1/Hcrt/Hesx1/Pmaip1/Esrrb/Kcp/Igf2bp1/Zscan22/Zfp954/2510009E07Rik/Ago2	19
Major ZGA	Major ZGA	12/249	1406/12760	0.00853485	0.437368	-3.15504	0.999843	0.999843	0.841973	E2f7/Spen/Fam83b/Plekha1/Cdkl4/Prtn3/Slc11a1/Dmrt1/Ptbp1/Prph/Atp2a1/Rlbp1	12

## Sheet: ora_down_set_8cWT-set_8cKO
Figure 2–Source Data 1. Overrepresentation Analysis (ORA) with DBTMEE Categories. ORA was performed using DBTMEE-defined (Park et al., 2015) gene sets as in Sakashita et al. (Sakashita et al., 2023) and DEGs up/down regulated from the pairwise comparisons. The analysis was run using function enricher from R package ClusterProfiler (v4.14.4). Results are shown only for sets with significant enrich…
ID	Description	GeneRatio	BgRatio	RichFactor	FoldEnrichment	zScore	pvalue	p.adjust	qvalue	geneID	Count
2-Cell Transient	2-Cell Transient	84/389	1142/12760	0.0735552	2.41276	8.8719	1.06412e-14	1.06412e-13	7.84092e-14	Gm15455/Tsc22d2/Tchh/Arhgap11a/Nat8f2/Fzd7/Btbd18/Antxr1/Obox3/Kdm5b/Zfand5/Spz1/D16Ertd472e/Rbm12b1/Slamf7/D030056L22Rik/Dbf4/Itgal/Kctd12/Zfp7/Prame62/Marchf3/Papolb/Arid5a/Ccser1/Fem1c/Rnf6/Hapstr1/Tbxa2r/Dsel/Arl2bp/EU599041/Nicn1/Slc19a3/Vmn2r92/Mns1/Rilpl2/Hhipl1/Alox12e/Fbxo45/Dnajb9/Tdpoz1/Col1a2/Sfi1/Dst/Cul3/Znhit6/Rad17/Dgke/Tigd3/Ube2o/Sox30/Nxf2/Ccna2/Atad2/Tmem184c/Zfp677/Tor3a/H2-Q…	84
Minor ZGA	Minor ZGA	108/389	2847/12760	0.0379347	1.24434	2.62276	0.00606837	0.0303418	0.0223572	Septin14/Lcor/Krcc1/Patj/Mfsd6/Phc2/Ipmk/Pxt1/Nhsl1/Tmem132c/Ptpdc1/Prelp/Nsd2/Siah2/Purg/Zkscan16/Golph3/Mettl9/Taf9b/Rbm15b/Ankrd44/Rcan3/Colgalt2/Foxk2/Zfp280b/Galm/Mgst3/Map3k13/Rnf26/Bicc1/Supv3l1/Plek/Klf17/Fbrsl1/Stc2/Gigyf2/Tspan5/Epb41/Grip1/Zfp943/Gfi1b/E2f1/Akap17b/Pitpnm2/Musk/Tmem232/Psip1/Chd7/Garnl3/Gramd1c/Gipc2/E130311K13Rik/Tesk1/Tent4a/Chmp1b2/Cbx8/Cfap410/Camsap1/Sgms1/Rnft2/R…	108
Maternal to ZGA	Maternal to ZGA	13/389	234/12760	0.0555556	1.82234	2.25129	0.0273088	0.0910293	0.0670742	1700017B05Rik/Adgrl4/Spdl1/Nes/Il17ra/Fam186a/Orc1/Tmem176a/Trpc1/BC049715/Tmem131l/Gpr179/Trim80	13
1-Cell Transient	1-Cell Transient	6/389	200/12760	0.03	0.984062	-0.040285	0.573841	0.999999	0.736842	Usp17ld/Cdk12/Idi1/Kcnrg/Dnai4/Cd34	6
Maternal RNA	Maternal RNA	84/389	2815/12760	0.0298401	0.978818	-0.225727	0.609403	0.999999	0.736842	Taf3/Tmem201/Cpa1/Cpeb1/Ddx11/Pstpip1/Dnaja4/Arg2/Rnf122/Prickle3/Spire1/Tusc3/Cachd1/Copz2/Nphp1/Tbc1d30/Stbd1/Megf9/Nlrp9a/Mvb12b/Sh2d3c/Nfkb1/Magea10/Sult5a1/Lrrk2/Zfp574/Fsd1/Clba1/Sft2d2/Sestd1/Mesp2/Slc2a12/Plekhn1/Rgs6/Bco1/Srrm4/Plxna2/Gldn/Drc3/Ccdc158/Gbe1/Ccno/Zfp964/Fam78b/Mfsd2a/Rnf166/Erich3/Lgr6/Rad50/Crb1/Psg16/Ptprn2/Scn10a/Gstm6/Ddx4/Ccdc110/Tmc5/Eif2ak2/Zfp595/Parp11/Polr1has/U…	84
Major ZGA	Major ZGA	40/389	1406/12760	0.0284495	0.933202	-0.470827	0.705031	0.999999	0.736842	Mplkipl1/Chit1/Trim71/Sowahc/Trak2/Zfp622/Ubtfl1/Polq/Utp3/4930447C04Rik/Jmy/Rfpl4b/Imp3/Drc1/Tbcc/Abcf1/Ell2/Esf1/Tor1b/Calml4/Mkrn2/Nkpd1/Ctrc/Tmem86a/Skil/Rlim/Zswim2/Tdp2/Rab42/Cdk9/Gtf3c5/Elovl4/Pkn2/Klf16/Cdcp1/Mad2l1bp/Gapt/Tgoln1/Sycp3/Cacna1b	40
Maternal to MGA	Maternal to MGA	16/389	928/12760	0.0172414	0.565553	-2.43704	0.996755	0.999999	0.736842	Dync2h1/Kif2c/Smc1a/Kdf1/Dync2i1/Zfp959/Pierce2/Galnt16/Cog8/Cimip2a/Igdcc4/Tpgs1/Tpd52l2/Ccdc78/Mterf1a/Bfsp1	16
Minor ZGA to MGA	Minor ZGA to MGA	3/389	500/12760	0.006	0.196812	-3.24891	0.999979	0.999999	0.736842	Mmp21/Gstm2/Pramel24	3
4-Cell Transient	4-Cell Transient	11/389	968/12760	0.0113636	0.372751	-3.59969	0.999985	0.999999	0.736842	Eif1ad7/Usp17lb/Eif1ad3/Pramel16/Aim2/Tdpoz3/Or6c217/Shroom1/Dyrk2/Cilp2/Xkr7	11
MGA	MGA	24/389	1721/12760	0.0139454	0.457437	-4.29098	0.999999	0.999999	0.736842	Zfp352/Spopfm2/Btg1/Tdpoz4/Zfp644/Arsk/Fgf1/Gm1527/Or8b35/Eif1ad4/Dmtf1l/Or10al2/Gcm1/Dusp2/Atad2b/Pih1d2/Grin2d/Vmn1r210/Aqr/Cracr2a/Tsr1/Calhm6/Bag5/Ccdc80	24

## Sheet: ora_up_set_8cWT-set_2cWT
Figure 2–Source Data 1. Overrepresentation Analysis (ORA) with DBTMEE Categories. ORA was performed using DBTMEE-defined (Park et al., 2015) gene sets as in Sakashita et al. (Sakashita et al., 2023) and DEGs up/down regulated from the pairwise comparisons. The analysis was run using function enricher from R package ClusterProfiler (v4.14.4). Results are shown only for sets with significant enrich…
ID	Description	GeneRatio	BgRatio	RichFactor	FoldEnrichment	zScore	pvalue	p.adjust	qvalue	geneID	Count
4-Cell Transient	4-Cell Transient	347/1318	968/12760	0.358471	3.47048	27.1356	2.64472e-112	2.64472e-111	1.67035e-111	Hspa8/Eef1a1/Usp48/Isyna1/Actb/Vnn1/Hnrnpa1/Rpl22/Dgkz/Cldn4/Dnaja1/Rragd/Ubr4/Macf1/Cul5/Bcat1/Arhgap1/Eef1b2/Eif2s2/Enah/Tpt1/Snx1/Snx5/Cdc6/Lasp1/Cd9/Gulo/Hnrnph1/Pold1/Eef1g/Pdha1/Rcc2/Ewsr1/Sfn/Nid1/Gpsm1/Aqp3/Gjb3/Cldn7/Cux2/Psmc6/Septin8/Dnajc7/Psd4/Erlin2/Trim43a/Tat/H2bc8/Itga3/Cstb/Hnrnpd/Bhmt/Fbxl20/Gsto1/Rbm47/Slc29a3/Cdipt/Tagln2/Kif13b/Gata6/Slc13a2/Srsf2/Hmga2/Ptpn13/Echdc2/Epas1/F…	347
MGA	MGA	383/1318	1721/12760	0.222545	2.15453	17.4762	2.41515e-56	1.20758e-55	7.6268e-56	Hsp90ab1/Rpl8/Rpl3/Cct7/Rplp2/Rps2/Gpd2/Eef2/Psap/Igf2r/Ptma/Gpd1l/Gldc/Rpl5/Npm1/Ctsa/Rpl21/Rpl9/Slc66a2/Naalad2/Ipo5/Sord/Rpl18a/Rack1/Eif4a1/Mkrn1/Supt5/Hdgf/Ago2/Ncl/Stag2/Parp1/Eif3a/Lsm12/Uggt1/Rpl26/Rps6/Rps3/Cdc5l/Rpsa/Gja1/Smarca4/Pemt/Rps9/Rps17/Sfpq/Zmpste24/Mfsd1/Rps15a/Larp4/Cad/Eif5/Rpl14/Sat1/Klf5/Slc5a6/Impdh2/Flvcr2/Snrpb/Cct4/Ypel2/Rflnb/Rps23/Timd2/Arih2/Pabpc4/Kdm3b/Npc2/Sugt1…	383
Maternal to MGA	Maternal to MGA	188/1318	928/12760	0.202586	1.96131	10.321	5.89586e-21	1.96529e-20	1.24123e-20	Plxnb2/Mlf2/Lamp1/Jarid2/Aaas/Gaa/Naca/Mta3/Prrc2a/Rpl7a/Cct5/Mef2d/Ppt2/Rpl32/Slc43a3/Psmc5/Eftud2/Xpo5/Dmap1/Lig1/Trim28/Tnrc18/Psmc1/Ccdc124/Sptan1/Cox6c/Slc28a3/Pfn1/Megf8/Mthfd1/Slc25a4/Psmc4/Pcsk6/Snrnp200/Vars1/Atg2a/Eef1d/Ndufs6/Amdhd2/Eif3k/Cds2/Aldoa/Cdh1/Leo1/Psma7/Atp5f1a/Plcg1/Eif4b/Bsg/Camk1/Kifc3/Ndufa5/Dpp7/Atp1a1/Sf3a3/Nagk/Phb2/Cherp/Psmd4/Mtg1/Vamp3/Prpf8/Ift172/Fkbp2/Ckb/Prkab…	188
Minor ZGA to MGA	Minor ZGA to MGA	89/1318	500/12760	0.178	1.72328	5.59964	1.61402e-07	4.03505e-07	2.54845e-07	Pou5f1/Anp32a/Rab3il1/Csrp1/Tpm4/Actn4/Sf3b3/Ass1/Ddb1/Map7/Fkbp8/Pdia5/Utrn/Hadh/Chd4/Idh1/Get3/Msh2/Spty2d1/Slc25a5/Stag3/Gnpnat1/Coro1c/Fdx1/Psmd2/H2ac13/Hells/Carm1/Neil1/Erf/Msh6/Api5/Neurl4/H3c4/Ap3b2/Myl6b/Armt1/Ptdss1/Stard10/Upk3b/Vav1/Rarb/Hcn2/Zfp960/Iqgap3/Tcf25/Ak8/Ptpn22/H2ac12/Mpp3/H3c6/H2ac20/Tmod1/Gga2/Trmo/Ing5/Anxa3/H2bc14/Riok3/Cdin1/Grhl3/Marcks/Tardbp/Appl2/Speg/Mgl2/Gatad1/…	89
1-Cell Transient	1-Cell Transient	20/1318	200/12760	0.1	0.968134	-0.154159	0.595976	1	0.631579	H1f3/Stk24/H3c2/H3f3b/Mcm2/Lin28a/Eif4a2/Mt4/Klhl31/Ppfia3/H4c11/Clcn1/Rec8/Ocrl/Helt/Srgap3/Osbpl3/Myo5c/Fndc7/Nadk	20
Maternal to ZGA	Maternal to ZGA	8/1318	234/12760	0.034188	0.330986	-3.50552	0.999982	1	0.631579	Trpt1/Cfap206/Xkr8/Cp/Pgls/Prap1/Mapk4/Sema3c	8
Major ZGA	Major ZGA	93/1318	1406/12760	0.0661451	0.640373	-4.85161	1	1	0.631579	Odc1/Rpl4/Rpl17/Stip1/Rplp0/Eif5a/Rps24/Eif4g1/Rplp1/Rps11/Rpl23a/Rps15/Gm2a/Rps5/Rps8/Fau/Rps26/Ybx1/Rps12/Atp5f1b/Itpr3/Rpl19/Rps29/Rps25/Rps16/Gcsh/Pmm1/Rps7/Hdac1/Pttg1ip/Impdh1/Fbl/Taf1c/Rpl18/Retn/Ccdc92b/Usp33/Mat2a/Spen/Adrm1/Rpl41/Rps3a1/Eif3b/Tpm3/Ubap2l/Eif3c/Atg14/Wsb1/Osm/Mlh3/Acyp1/Tpr/Majin/Prph/Snrpa1/Uimc1/Sccpdh/H3c11/Pirb/Cox7a1/Npepl1/Fbxo31/Edaradd/Adamtsl5/Slmap/Rps13/Efnb3/…	93
2-Cell Transient	2-Cell Transient	19/1318	1142/12760	0.0166375	0.161073	-10.0834	1	1	0.631579	Cops7a/Kmt2a/Gpr157/Ppm1n/Klf13/Stra8/Serpine1/P3h2/Praf2/Slc7a4/Cacna2d4/Ier3/Phactr1/Ugcg/Gbgt1/Clu/Gzmm/Zfp831/Zfp629	19
Maternal RNA	Maternal RNA	110/1318	2815/12760	0.0390764	0.378312	-12.6802	1	1	0.631579	Hsp90aa1/Ldb1/Btrc/Sf3b2/Selenow/Ybx3/Arpc1b/Arhgef1/Rps23rg1/Trappc3/Ppfibp2/Akap1/Sipa1/G6pc3/Cdt1/Cep131/Nsmce1/Prpf6/Hsd17b4/Kdm2b/Aldh1l1/Commd9/Slc35f6/Cnpy2/Commd1/Mrpl14/Anxa2/Atp5mc2/Zfp692/Gadd45gip1/Myl4/Fhod1/Rtkn/Bcl7b/Igbp1/Glyr1/Inpp5d/Adck1/Pcbd2/Crlf2/H2-Oa/Atp8a2/H3c1/Sdhc/Fes/Parp16/Micu3/Fxyd4/Nrap/Kcnn4/Bola3/Atp9a/Tmem237/Nadsyn1/Ppef2/Arhgef10/Akr1c21/Zfp418/Anapc2/Lrrc42/P…	110
Minor ZGA	Minor ZGA	61/1318	2847/12760	0.0214261	0.207433	-16.2833	1	1	0.631579	Cfl1/Etl4/Hadha/Mcm10/Cit/Ywhae/Abtb1/Ap3b1/Vav2/Vps72/Ap2b1/Commd10/Slc35c2/Tmco4/Akap12/Camk2d/Zbtb12/Sbf1/Prkra/Ttll7/Uba1/Pwwp3a/Zfp691/Atp6v1a/Nup88/Arhgef26/Med28/Nsg2/Pon3/Dnai2/Smco4/Tnnt1/Dhodh/Slc35d2/Tom1l1/Hnrnph3/Gm4832/Rap1gap2/Fam241a/Col12a1/Txn2/Tax1bp3/Tenm2/Tmem259/P2rx4/Lims2/St13/Corin/Picalm/Grin3a/Dync1i1/Dnah6/Plpp2/Lpin1/Ankrd28/Myof/Duxf4/Zfp58/Ryr2/Lrp4/St8sia1	61

## Sheet: ora_down_set_8cWT-set_2cWT
Figure 2–Source Data 1. Overrepresentation Analysis (ORA) with DBTMEE Categories. ORA was performed using DBTMEE-defined (Park et al., 2015) gene sets as in Sakashita et al. (Sakashita et al., 2023) and DEGs up/down regulated from the pairwise comparisons. The analysis was run using function enricher from R package ClusterProfiler (v4.14.4). Results are shown only for sets with significant enrich…
ID	Description	GeneRatio	BgRatio	RichFactor	FoldEnrichment	zScore	pvalue	p.adjust	qvalue	geneID	Count
Minor ZGA	Minor ZGA	985/2233	2847/12760	0.345978	1.97702	27.2392	4.05089e-145	4.05089e-144	2.98486e-144	Ccdc6/Siah2/Stradb/Rhpn2/Cdc42se2/Strn/Psip1/Foxj3/Ankrd44/Btg4/Dcun1d1/Sfmbt1/Arfgef1/Kbtbd8/Rbm38/Tent4a/Spry4/Plekha8/Ipmk/Cdr2/Rab3d/Mllt3/Garre1/Phf1/Phc2/Lbx1/Slain1/Mllt11/Oog3/Foxk2/Paip1/Nhsl1/Abl2/Dusp7/Septin14/Golph3/Tmtc1/Epb41/Tulp3/Cttnbp2nl/E2f1/C2cd5/Slain2/Dcp2/Arap2/Camsap2/Clock/Ptpdc1/Ncoa6/Rapgef5/Otud4/Omt2a/Pramel51/Smarca2/Naa30/Tiam2/Pou4f1/Plag1/Psme4/Rasa2/Rnf38/Slco3a…	985
2-Cell Transient	2-Cell Transient	311/2233	1142/12760	0.272329	1.55617	9.07137	5.36586e-18	2.68293e-17	1.97689e-17	Dbf4/Obox3/Gpbp1/Gm15455/Tsc22d2/Sfi1/Hspa5/Fzd7/Esco1/Prame62/Fem1b/D16Ertd472e/Rilpl2/Arl2bp/D030056L22Rik/Marchf3/Rnf6/Hapstr1/Cbln1/Cul3/Uspl1/Brd1/Spz1/Btbd18/Ube2o/EU599041/Mmp19/Zfp707/Tbxa2r/Rad17/Fbxo45/Atad2/Arid5a/Scaf4/Eid2/Slc19a3/G2e3/Cstf2t/L1td1/Spn/Slc1a4/Naif1/Sgsh/Sowaha/Itgal/Bicral/Fem1c/Mns1/Dgke/Meioc/Dusp5/Nicn1/Slc43a2/Kctd12/Tdpoz1/Kif3c/Antxr1/Zdhhc5/Gadd45a/Orai2/Camkk…	311
Maternal RNA	Maternal RNA	596/2233	2815/12760	0.211723	1.20985	5.80813	6.68248e-09	2.22749e-08	1.64131e-08	Mdm4/Ermp1/Spin1/Pacsin2/Ccdc186/Atp2c1/Rspo2/Taf3/Cpa1/Prrg1/Ninj1/Rragc/Zfp57/Ralbp1/Prickle1/Chsy1/Herpud2/N4bp2/Scn10a/Lratd2/Spire1/Stbd1/Mapk8/Kit/Mesp2/C2cd3/Itga6/Slc39a10/Arhgap12/Tob2/Stt3b/Mtus1/Bmp15/Tet3/Nlrp14/Eif4enif1/Tmem108/Noct/Dnaja4/Mfsd2a/Zfp664/Smad3/Cpeb1/Dtx2/Orai1/Otub2/Wdr20/Foxj2/Ccno/Mfap2/Mansc1/Iqsec2/Rimkla/Rnf122/Zfp592/Fkbp5/Dclk2/Paip2b/Mtmr14/Cd55/Zbed3/Sec16a/…	596
Maternal to ZGA	Maternal to ZGA	48/2233	234/12760	0.205128	1.17216	1.22416	0.128613	0.321532	0.236918	1700017B05Rik/Ppp1r15a/Spdl1/Adgrl4/Fam186a/Il17ra/Syt11/Nes/Nptx2/Qsox1/Pld6/Map4k5/Yaf2/Cpd/Ptger4/Calm2/Atl3/Rsph6a/Pag1/Slc30a1/Ing1/Mcrip1/Ube3a/Rdh12/Trpc1/Cnksr2/Tas1r1/Penk/Gpr179/Cog4/Pou3f3/Upk1a/Gramd2a/Itgb2/Slc17a9/Uck2/Galns/Pacc1/Zic2/Tagap/Snx15/Trim59/Tlcd2/Fam72a/Txndc11/Dynll1/Prss8/Spata21	48
1-Cell Transient	1-Cell Transient	10/2233	200/12760	0.05	0.285714	-4.68913	1	1	0.736842	Cdk12/Usp17ld/Elmod3/Kras/Wfdc18/Prrg4/Idi1/Stpg3/Kbtbd4/Gfap	10
Major ZGA	Major ZGA	175/2233	1406/12760	0.124467	0.711238	-5.28639	1	1	0.736842	Khdc1b/Bmi1/Fam199x/Phtf2/Frg2f1/Hipk1/Nexn/Pkn2/Ppp2r5d/Evi5/Wapl/Mplkipl1/Ube2k/Apc/Rnf141/Nfe2/Rock1/Fbxo11/Ap1ar/Snapc2/Zscan5b/Chit1/Crk/Kif2a/Ireb2/Rbm27/Atf2/Mybl1/Ncapg2/Klf16/Scoc/Tab3/Arl4a/Tgfbr1/Oaz2/Zmynd19/Msl2/Nlrp3/Slc25a25/Rlim/Zswim4/Rasa1/Lrrn4cl/Akap11/Casp8ap2/Phf23/Thap12/Lin54/Sowahc/Kifc2/Cptp/Fam135a/Haspin/Mak16/Bcor/5730409E04Rik/Dgcr8/Calml4/Gapt/Gtf3c5/Npas1/Taf7/Usp3…	175
4-Cell Transient	4-Cell Transient	22/2233	968/12760	0.0227273	0.12987	-12.9697	1	1	0.736842	Usp17lb/Eif1ad7/Zscan4b/C2cd4b/Eif1ad3/Shroom1/Tdpoz3/Trpc5os/Lrrc74b/Ubap1l/Scarf2/Btbd3/Cdh26/Ilvbl/Prkch/Nudt13/Pde4a/Pramel11/Cd300a/Phlda2/Atg4c/Fn3krp	22
Maternal to MGA	Maternal to MGA	28/2233	928/12760	0.0301724	0.172414	-12.0575	1	1	0.736842	Kif2c/Kdf1/Galnt16/Sft2d3/Dync2i1/Lrrc37/Rhou/Avpi1/Tpgs1/Ddt/Misp/Mterf1a/Zfp579/Mmp24/Stimate/Irf2bp2/Ccdc17/Clmn/Cyp2t4/Zfp777/Ephx2/D430041D05Rik/Ntf5/Il17rc/Cog8/Pierce2/Lrp8/Morn1	28
MGA	MGA	42/2233	1721/12760	0.0244044	0.139454	-17.6767	1	1	0.736842	Zfp352/Spopfm2/Vmn1r210/Cdkn3/Arsk/Kdm4d/Ficd/Gata4/Or8b35/Eif1ad8/Ccdc59/Atad2b/Aif1/Cx3cl1/Pank1/Nlrp12/Fbxo2/Gipc3/Maneal/Adap1/Bag5/Eif1ad4/Atf1/En2/Lmx1b/Ttc14/Chtf8/Fundc1/Phf21a/Iqcf1/Fgf1/Spsb1/Zkscan3/Lzts3/Mkks/Ccdc25/Kcne3/Dusp28/Grin2d/Lrrc15/1700088E04Rik/Brd8dc	42
Minor ZGA to MGA	Minor ZGA to MGA	16/2233	500/12760	0.032	0.182857	-8.58496	1	1	0.736842	Pramel24/Edem1/Zscan4e/Msantd5f6/Msantd5f9/Neurl3/Tnfrsf1b/Rimklb/Il11ra1/Mmp21/Ppp3ca/Elapor1/Hormad2/Ccdc89/Pramel19/Rmdn3	16

## Sheet: ora_up_set_8cKO-set_2cKO
Figure 2–Source Data 1. Overrepresentation Analysis (ORA) with DBTMEE Categories. ORA was performed using DBTMEE-defined (Park et al., 2015) gene sets as in Sakashita et al. (Sakashita et al., 2023) and DEGs up/down regulated from the pairwise comparisons. The analysis was run using function enricher from R package ClusterProfiler (v4.14.4). Results are shown only for sets with significant enrich…
ID	Description	GeneRatio	BgRatio	RichFactor	FoldEnrichment	zScore	pvalue	p.adjust	qvalue	geneID	Count
MGA	MGA	646/1770	1721/12760	0.375363	2.70601	30.5353	3.18357e-161	3.18357e-160	1.67556e-160	Hsp90ab1/Rpl3/Rplp2/Rpl8/Zmpste24/Ncl/Npm1/Eef2/Ctsa/Rpl26/Gpd2/Rps17/Sugt1/Hnrnpa2b1/Eif3a/Sfpq/Ipo7/Rpsa/Ccdc43/Rpl5/Rps9/Set/Rps3/Rack1/Eif3g/Gldc/Slc6a6/Cad/Larp4/Sord/Cct7/Rpl9/Rps2/Gja1/Rpl14/Igf2r/Serbp1/Parp1/Uggt1/Map1lc3b/Rps15a/Slc5a6/Rps20/Cct6a/Rpl21/Rpl12/Wdr43/Eif4a1/Smarca4/Rps6/Eif3l/Rrp1/Ddx21/Nr5a2/Pelp1/Ptma/Nasp/Ubtf/Impdh2/Pramel7/Map1lc3a/Rpl13/Stag2/Nudt4/Acadm/Eprs1/Rps27…	646
4-Cell Transient	4-Cell Transient	360/1770	968/12760	0.371901	2.68105	21.8333	3.79752e-81	1.89876e-80	9.99347e-81	Hspa8/Vnn1/Rpl22/Bcat1/Eef1a1/Isyna1/Cul5/Sox21/Snx5/Eif2s2/Hnrnpa1/Srsf2/Cripto/Ckmt1/Eif3d/Azin1/Ewsr1/Usp48/Esrp2/Aimp1/Trim43a/Dnaja1/Cldn4/Sfn/Hnrnpd/Itga3/Enpp3/Smpdl3a/Lrpap1/Sox15/Grin1/Gata6/Pdha1/Hand1/Hnrnph1/Phldb3/Gjb3/Galk1/Mthfsd/Psd4/Bhmt/Grn/Rragd/Zan/Aifm3/Gulo/Ddah1/Fus/Ccn1/Atic/Mllt6/Srsf3/Cct2/Atg7/Sycn/Glmp/Eef1g/Plaur/Tyms/Rbm47/Nsmce4a/H2bc8/Cmtm7/Slc35g1/Mov10/Ddx1/Slc38…	360
Maternal to MGA	Maternal to MGA	239/1770	928/12760	0.257543	1.85664	10.8752	1.09427e-23	3.64757e-23	1.91978e-23	Cct5/Rpl7a/Crnkl1/Rpl32/Mthfd1/Atp5f1a/Cyth2/Eef1d/Tnip1/Psmc1/Ccdc124/Naca/Trim28/Nol12/Eftud2/Atg2a/Ap3d1/Elp1/Tnrc18/Eif4b/Cpsf3/Lars1/Smc1a/Rps4x/Prpf31/Prrc2a/Ccdc117/Leo1/Psmd6/Phb2/Eloc/Psmd4/Trap1/Supt6/Cherp/Pcsk6/Lonp1/Mrpl12/Prpf8/Ckb/Psma7/Ndufs6/Mlf2/Ptgis/Snrnp200/Ruvbl2/Plxnb2/Mrps18a/Utp20/Fam50a/Tpd52l2/Psmd12/Psmc5/Psmc4/Gtf2h2/Sf3a3/Gucy2e/Pcnt/Mta3/Col27a1/Lmbrd1/Xrcc1/Ppt2/Ps…	239
Minor ZGA to MGA	Minor ZGA to MGA	94/1770	500/12760	0.188	1.3553	3.2526	0.00106634	0.00266586	0.00140308	Sf3b3/Ass1/Nono/Cdc25a/Supt16/H1f5/Rab3il1/Msh6/Gfm1/Klhl5/Smarcad1/Wdr83/Mgl2/H4c4/H3c4/Akt1s1/Neil1/Timm44/Arhgap18/Spty2d1/Eef1e1/Chd4/Mmp21/Tcf25/Esco2/Csrp1/Rsph4a/Zfp960/Psmd2/Oxct1/Rreb1/Snrpd3/Ung/Sec13/Ptpn23/Nars1/Ywhab/Cdin1/Actn4/Map7/Kat5/Dhx36/Sult4a1/Mturn/Idh1/Speg/Sar1b/H2ac20/Pfdn2/Zmynd8/Pole3/Pelo/Slc25a22/Vav1/Stag3/Anp32a/Msh2/Matcap1/Tmod1/Snrpb2/Snrpf/Neurl4/Cdc42/Iqgap3/P…	94
Major ZGA	Major ZGA	222/1770	1406/12760	0.157895	1.13827	2.20567	0.0162429	0.0324858	0.0170978	Rpl4/Odc1/Stip1/Rps8/Rps7/Ybx1/Rpl23a/Rpl17/Rps24/Abcf1/Mtrex/Rps15/Gcsh/Rpl41/Dppa3/Rplp1/Rpl11/Rps5/Hnrnpab/Eif4g1/Adrm1/Rpl23/Rps12/Rps26/Eif3c/Nolc1/Suds3/Rpl19/Gtf2f1/Pttg1ip/Eif5a/Gnl3/Tpr/Rpl18/Hdac1/Pa2g4/Eif3b/Fbxo31/Sdad1/Rps11/Bdp1/Ebna1bp2/Hspa9/Polq/Rps16/Mat2a/Cfdp1/Wsb1/Por/Dnttip2/Hnrnpm/Ppat/Tomm5/Zbtb17/Ranbp2/Tbc1d9/Brd9/Rps25/Utp3/Fau/Rpl28/Nop56/Rpl35/Alpl/Spic/Pwp1/Impdh1/Rp…	222
1-Cell Transient	1-Cell Transient	19/1770	200/12760	0.095	0.684859	-1.80269	0.976305	1	0.526316	H1f3/H3f3b/Pold3/Mcm2/Osbpl3/H4c14/Rec8/Gins4/Rrp8/Nup160/H4c11/Eif4a2/Bbs5/Cd34/Zfp87/Rnf113a2/Zdhhc4/Nedd4l/Magohb	19
Maternal to ZGA	Maternal to ZGA	14/1770	234/12760	0.0598291	0.43131	-3.52349	0.999968	1	0.526316	Rrp1b/Smc3/Adam4/Kif22/Map1s/Thop1/Swap70/Asap3/Ddx24/Smpd1/Orc1/Mrpl28/Cp/Mapk4	14
2-Cell Transient	2-Cell Transient	40/1770	1142/12760	0.0350263	0.252506	-10.6236	1	1	0.526316	Ctsl/Serpine1/Arhgap11a/Ctsb/Myorg/Racgap1/Srsf1/Rpl10l/Bclaf1/Ints4/Acer1/Ppm1n/Adam19/Txlna/Ier3/Iqcg/Slc27a2/Ncbp2/Ripk3/Mxi1/Tmem184c/Pcf11/Cops7a/Gtf2h1/Nkapl/Deaf1/Knop1/Nbl1/Dhx33/Thbs1/Wdr55/Fkbp6/Nsun7/Sycp1/Mogat1/Mill2/Taf15/Trim56/Asxl2/Ifi35	40
Maternal RNA	Maternal RNA	95/1770	2815/12760	0.0337478	0.243289	-18.25	1	1	0.526316	Sf3b2/Hsp90aa1/Aldh1l1/Prpf6/Rps23rg1/Smc4/Pak1ip1/Bms1/Cdt1/2310033P09Rik/Btrc/Gng2/Tgfbi/Cyp4f13/Csnk1e/Gadd45gip1/Cdk11b/Akr1e1/Hspbap1/Fabp12/Chst10/Sox7/Rasgrf1/Fam151a/Edar/Kirrel1/Paip2/Mrps35/Cfap69/Adss1/Rtkn/Ppfibp2/Ggcx/Abhd14a/Noc4l/Dnai1/Ldb1/Gramd2b/Pigk/Ctnnbl1/Sart3/Ndufa10/Lmna/Arhgef16/Leng9/Gstm6/Cxxc1/Tomt/Atp5mc2/Sgf29/Sipa1/Srrm4/Rnf144b/Dmac1/Gsto2/Atp6v1e1/Gmppa/Rgl3/Prr23…	95
Minor ZGA	Minor ZGA	41/1770	2847/12760	0.0144011	0.103818	-21.7713	1	1	0.526316	Mcm10/Ccnb1/Vps72/Sfswap/Gigyf2/Chrnb4/Tm6sf2/Dok5/Ywhae/Gm4832/Dnajc8/Rnf217/Cfl1/Lrrc10b/Traf6/Uba1/Slc4a1ap/Hadha/Spag7/Nol10/Gfi1b/Patz1/Pwwp3a/Hpse2/Polr3f/Cyfip1/Arhgef10l/Commd10/Poll/H4c6/Ebf1/Cep295/Map3k7cl/Stx17/H3c13/Aven/Tenm2/Gstz1/Zfp330/Cfap58/Acp3	41

## Sheet: ora_down_set_8cKO-set_2cKO
Figure 2–Source Data 1. Overrepresentation Analysis (ORA) with DBTMEE Categories. ORA was performed using DBTMEE-defined (Park et al., 2015) gene sets as in Sakashita et al. (Sakashita et al., 2023) and DEGs up/down regulated from the pairwise comparisons. The analysis was run using function enricher from R package ClusterProfiler (v4.14.4). Results are shown only for sets with significant enrich…
ID	Description	GeneRatio	BgRatio	RichFactor	FoldEnrichment	zScore	pvalue	p.adjust	qvalue	geneID	Count
Minor ZGA	Minor ZGA	1424/3281	2847/12760	0.500176	1.94521	33.6628	1.04134e-227	1.04134e-226	7.67305e-227	Ccdc6/Rbm38/Siah2/Stradb/Strn/Btg4/Wwc2/Kbtbd8/Cdc42se2/Rhpn2/Ncoa6/Spry4/Arfgef1/Fyco1/Psip1/Rnf38/Rnf14/Plekha3/Mllt3/Sbf2/Psme4/Raf1/Sfmbt1/Ankrd44/Atp2a2/Arap2/Foxj3/Slain2/Ube4b/C2cd5/Pard3/Kpna3/Nav2/Slain1/Peak1/Oog3/Obox5/Clock/Plekha8/Garre1/Gm1965/Dusp7/Angel2/Eif4e1b/Bmp5/Usp15/Rab3d/Cdr2/Ryk/Wasf3/Map2k4/AI987944/Cttnbp2nl/Mcu/Phf1/Cep120/Tent4a/Fam117b/Zbtb18/Naa30/Osbpl8/Atxn1/Usp46…	1424
Maternal RNA	Maternal RNA	1046/3281	2815/12760	0.371581	1.4451	15.7371	4.23958e-53	2.11979e-52	1.56195e-52	Ermp1/Spin1/Mdm4/Tet3/Ccdc186/Zfp57/Ralbp1/Atp2c1/Ninj1/Rragc/Pacsin2/Stt3b/Mfap2/Kit/Herpud2/Phf20/Rspo2/Txndc2/Scap/Orai1/Dtx2/Dipk2a/Mtmr14/Bscl2/Dcp1a/Eif4enif1/Qser1/Cpa1/Itga6/Spast/Rdx/Prrg1/Ccdc69/C2cd3/Slc45a3/Slc39a10/Tob2/Chn1/Prickle1/D6Ertd527e/Foxo1/Tbc1d8/Nlrp14/Noct/Mansc1/Hs2st1/Zfp664/Wdr20/Secisbp2l/Chsy1/A430033K04Rik/Slc39a6/Ephb4/Zbed3/Mtus1/Ldhb/N4bp2/Mest/Prdx2/Alkbh5/Lsm1…	1046
Maternal to ZGA	Maternal to ZGA	77/3281	234/12760	0.32906	1.27973	2.54083	0.00789419	0.026314	0.0193892	Map4k5/Ppp1r15a/Yaf2/Nptx2/Trim59/Uck2/Pld6/Syt11/Tob1/Abtb2/Zfp503/Armc9/Sdf2l1/Rsrp1/Cotl1/Yes1/Tlcd2/Cnksr2/B3gnt2/1700017B05Rik/Pou3f3/Oscp1/Nt5dc2/Camkk1/Abca7/Eva1b/Adgrl4/Pacc1/Rasd1/Cpd/Kcnq5/Tigd5/Fam72a/Sema3f/Adgrv1/Thy1/Nptn/Tmem116/Samd8/Esyt1/Rsph6a/Pcnx2/Pcsk4/Itgb2/Tmem185a/Calm2/Psmd5/Lpxn/Tagap/Meox2/Efs/Mmp17/Fam186a/Ankef1/Notch2/B3galt5/Mcrip1/Abl1/Slc30a1/Hycc1/Scn9a/Pcdh19/…	77
2-Cell Transient	2-Cell Transient	291/3281	1142/12760	0.254816	0.990995	-0.187627	0.586523	1	0.736842	Dbf4/Zdhhc5/Mmp19/Mdm2/Gpr50/Esco1/Gadd45a/Smad7/Fem1b/Sowaha/Hes2/Rest/Rap2a/Fam43b/Efnb2/Uspl1/Zbtb41/Obox3/Pdpr/Arl2bp/Hic2/Scaf4/Fzd5/L1td1/Sec24a/Hspa2/Gpatch3/Fzd2/Ptges/Trib3/Prame62/Hmgn5/Pcsk1n/Trp53bp2/Bicral/Rapgef6/Tfpi/C1galt1/Eid2/Sox11/Dpf1/Dnajc28/Cnnm2/Pip5k1a/Sfi1/Cbln1/Dusp5/Spn/Plekho2/Klhl11/Slc1a4/G2e3/Bspry/Sox4/Hbegf/Epc2/Dyrk3/Meioc/Spz1/Slc66a1/Rfxap/Lta/Usp32/Tchp/Gsdmd…	291
1-Cell Transient	1-Cell Transient	34/3281	200/12760	0.17	0.66114	-2.84165	0.998829	1	0.736842	Slk/Gsk3a/Dut/Arid2/Siva1/Sp9/Cdca3/Dcun1d5/Tnfrsf11b/Arl5c/Rcn1/Shox2/Ttc9/Kras/Hspb8/Hoxd8/Fndc7/Ppfia3/Stpg3/Prok1/Fyb1/Cdhr5/Nadk/Ildr2/Sox2/Vmn1r203/Lmcd1/Bmper/Dock1/Reep6/Gfap/Txndc8/Helt/Arrdc3	34
4-Cell Transient	4-Cell Transient	61/3281	968/12760	0.0630165	0.245075	-14.374	1	1	0.736842	Zscan4f/C2cd4b/Pramel20/Polr2j/Trpc5os/Ticam1/Zswim5/Zscan4b/Fndc4/Pramel21/Creb3l1/H2-DMa/Amh/Myl9/Eif4a3l1/Ifngr2/Vmn2r52/Grm6/Gsc/Psd/Acot1/Sh3glb1/Parva/Cimip3/Anxa1/Dchs1/Bag2/Dbil5/Prkch/Fbln2/Pla2g10/Ccdc187/Magea14/Six1/Fam83c/Pdlim3/Prss36/Or4f52/Ccng1/Abat/Scarf2/Asb2/Htr5b/Zbtb42/Cd74/Pramel11/Cdh26/Gm4567/Plk5/Lrrc74b/Shisal2b/Helz2/Cabp7/Tcf12/Dhtkd1/Vamp2/Usp17lb/Slc29a1/Plet1/Khk/N…	61
Major ZGA	Major ZGA	174/3281	1406/12760	0.123755	0.481292	-12.1303	1	1	0.736842	Bmi1/Khdc1b/Wapl/Fam199x/E2f7/Apc/Evi5/Rock1/Mia2/Osbpl11/Phtf2/Ube2k/Rnf141/Snapc2/Crk/Frg2f1/Thap12/Atf2/Ireb2/Luzp1/Arl4a/Mybl1/Ppfia1/Fam171b/Rasd2/Nexn/Cptp/Syna/Ptp4a2/Scoc/Rasa1/Ap1ar/Kif2a/Pkn2/Zswim4/Zmynd19/Pcmtd1/Hipk1/Akap11/Stox1/Plekha1/4930407I10Rik/Acox1/Tab3/Dmrta2/Man2a2/Npas1/Tmprss9/Irx2/Fam83b/Oaz2/Lbh/Nrip3/Cdkl4/Tab2/Cyth1/Lhx1/Snip1/Usp38/Thap11/Ncapg2/Ltb4r2/Rnf128/Trim67…	174
Maternal to MGA	Maternal to MGA	51/3281	928/12760	0.0549569	0.213731	-14.6334	1	1	0.736842	Lpgat1/Sft2d3/Rhou/Qrich1/Rbm15/Tm2d2/Tmem123/Snx21/Mal/Mycbpap/Gabrp/Zfp786/Atxn2/Tuba1c/Lrp8/Ppib/Doc2a/Asb3/Mfsd3/Ntf5/Smim29/Podn/Irx3/Tuba1b/Car2/Ntrk1/Selenom/Nrtn/Pex11g/Tars3/Dact2/1700010D01Rik/Gnal/Misp/Exo5/Srrm3/Hdac7/Manf/Ppp2r5a/Fndc1/Avpi1/Fchsd1/Ier2/Tgm1/Bcl11b/Gdpd3/Arcn1/Timp3/Wdr95/Cebpd/Nlgn2	51
MGA	MGA	77/3281	1721/12760	0.0447414	0.174002	-21.6738	1	1	0.736842	Zfp352/Klf4/Eomes/Trim14/Eif1ad8/Ift70b/Pmaip1/Zfp599/Gipc3/Ankrd34b/Vmn1r227/Tbx2/Klrg2/Kdm4d/Srxn1/Tle4/Chst2/Ficd/Cd19/Maneal/Hcrt/Gas2l1/Tspan15/1700088E04Rik/Pltp/Aif1/Flrt2/Arsk/Rasip1/4933409G03Rik/4833439L19Rik/Hesx1/Adcy7/Cort/Atp8b5/Jund/2510009E07Rik/Impg2/B3gnt3/Eya2/En2/Zfp54/Fundc1/Gm5127/1700001K19Rik/Rgma/Tspan8/Slc51a/Or1e1c/C1ql4/Efna3/Zfp954/Cfh/Pbx3/Fbxo2/Src/Cyp2ab1/Ltbp1/Bbs…	77
Minor ZGA to MGA	Minor ZGA to MGA	46/3281	500/12760	0.092	0.357793	-8.61876	1	1	0.736842	Msantd5f6/Zscan4c/Msx1/Usp17lc/Lmo4/Zscan4e/Rarb/Edem1/Msantd5f9/Baz2b/Pramel24/Zbtb38/Zbtb16/Vsx1/Rcor3/Samd4b/Anapc1/Myl6b/Phldb2/Macroh2a1/Marcks/Nlrc5/Gas1/Ccdc89/Pramel19/Lad1/Atf5/Tnfrsf1b/Elapor1/Padi3/Zscan4d/Slc25a39/Zfp934/Foxo6/Gng5/Dcst1/Neurl3/Myom1/Slfn9/Armt1/Igf2/Fer1l4/Wnt11/Tex19.1/Ezr/Mtpn	46
