# Supplementary material for: SETDB1 enables development beyond cleavage stages by extinguishing the MERVL-driven two-cell totipotency transcriptional program in the mouse embryo
Source: eLife. 2026 Feb 16;15:RP109248. doi: 10.7554/eLife.109248 (PMC12908936; doi:10.7554/eLife.109248)
Supplement: Figure 3—source data 1. — Chimeric transcripts previously identified from the datasets of Xue et al., 2013, and Deng et al., 2014 by Modzelewski et al., 2021, and de novo identified ones according to Modzelewski et al., 2021 were analyzed across four pairwise comparisons and annotated with their corresponding Venn diagram compartments from the four-way analysis. Values in the sample columns for the four pairwise DE transcript comparisons (last four sheets) are normalized counts generated using DESeq2 (v1.46.0). [file elife-109248-fig3-data1.xlsx]

## Sheet: Chimeric transcripts Xue_2013
Figure 3–Source Data 1. Chimeric Transcript Analysis. Chimeric transcripts previously identified from the datasets of Xue (Xue et al., 2013), and Deng (Deng et al., 2014) by Modzelewski et al. (Modzelewski et al., 2021), and de novo identified ones according to Modzelewski et al (Modzelewski et al., 2021) were analyzed across four pairwise comparisons and annotated with their corresponding Venn d…
Retrotransposon:Gene junction	Gene symbol	up_set_2cWT-set_2cMU	up_set_8cWT-set_8cMU	up_set_8cWT-set_2cWT	up_set_8cMU-set_2cMU	down_set_2cWT-set_2cMU	down_set_8cWT-set_8cMU	down_set_8cWT-set_2cWT	down_set_8cMU-set_2cMU	Chromosomal location of retrotransposon:gene junction	Retrotransposon:gene junction start	Retrotransposon:gene junction end	Retrotransposon subfamily that overlaps with the 5' RT:gene junction read	Retrotransposon family that overlaps with the 5' RT:gene junction read	Retrotransposon class that overlaps with the 5' RT:gene junction read	Retrotransposon subfamily that overlaps with the 3' RT:gene junction read	Retrotransposon family that overlaps with the end of RT:gene junction	Retrotransposon class that overlaps with the end of RT:gene junction	Strand	Type	LogFC(pronucleus/oocyte)	LogFC(2cell/oocyte)	LogFC(4cell/oocyte)	LogFC(8cell/oocyte)	LogFC(morula/oocyte)	LogCPM	Likelihood Ratio Statistic	P Value	FDR	Ranking	oocyte_1	oocyte_2	pronucleus_1	pronucleus_2	pronucleus_3	2-cell_1	2-cell_2	2-cell_3	4-cell_1	4-cell_2	4-cell_3	8-cell_1	8-cell_2	8-cell_3	morula_1	morula_2	morula_3	totalX
MT2B1:Rpl41	Rpl41	X		X	X					chr10	128548973	128551633	NA	NA	NA	MT2B1	ERVL	LTR	-	promoter_tss	-0.285431	10.6156	9.79594	8.55202	10.0053	17.2814	104.987	4.68964e-21	6.39354e-19	1	14	19	12	7	19	3309	2842	24954	2150	1447	12031	1534	1435	5448	8689	12159	4428	3
MIRb:Rpl13a	Rpl13a			X	X					chr7	45126537	45126708	MIRb	MIR	SINE	NA	NA	NA	-	internal	-0.0387103	5.81747	6.67872	7.10348	5.49875	16.8314	111.876	1.64411e-22	3.05655e-20	2	114	161	103	149	126	1873	2037	4482	3338	3225	7403	3105	3110	20052	3174	4002	1877	2
MT2A:Oosp1	Oosp1							X	X	chr19	11667822	11668296	MT2A	ERVL	LTR	NA	NA	NA	-	terminator	0.206686	-0.40678	-3.21632	-6.18553	-5.44804	14.9639	27.5714	4.41377e-05	0.000147728	3	5029	4505	5391	5089	4905	888	1094	1836	7	458	4	6	74	1	26	33	80	2
MT2B1:Pkd2l2	Pkd2l2							X	X	chr18	34408667	34409809	MT2B1	ERVL	LTR	NA	NA	NA	+	promoter_tss	1.56825	-2.72122	-3.31248	-8.70996	-9.00016	12.9057	54.1126	1.98706e-10	2.40446e-09	4	1127	469	2246	2177	2182	41	54	22	1	72	0	1	1	0	2	0	0	2
MTC-int:E330021D16Rik	E330021D16Rik							X	X	chr6	136401886	136415326	NA	NA	NA	MTC-int	ERVL-MaLR	LTR	-	internal/promoter_tss	-1.72131	-5.06483	-8.46242	-9.24867	-6.88807	12.0185	72.5919	2.95688e-14	8.39837e-13	5	1379	1894	371	366	667	19	20	8	2	2	0	1	2	0	1	0	15	2
RLTR20A4:Jak2	Jak2							X	X	chr19	29311041	29311740	RLTR20A4	ERVK	LTR	NA	NA	NA	+	internal	1.70393	3.36844	1.25667	-3.62452	-2.57296	14.0076	54.3574	1.76965e-10	2.16703e-09	6	428	362	1369	1118	1101	1246	1535	1342	569	209	36	27	2	7	26	25	38	2
MIRb:Cited1	Cited1			X	X					chrX	102248008	102248562	NA	NA	NA	MIRb	MIR	SINE	-	internal	-2.45028	7.61125	12.0516	10.2786	11.6204	14.7023	100.729	3.71086e-20	4.21595e-18	7	1	1	0	0	0	40	41	192	267	499	4858	248	322	1522	1722	1962	1693	2
RLTR19-int:Hnrnpa3	Hnrnpa3			X	X					chr2	75665301	75665397	RLTR19-int	ERVK	LTR	RLTR19-int	ERVK	LTR	+	internal/terminator	0.957584	3.56351	4.48515	3.99232	2.87119	14.9097	154.078	1.80835e-31	3.69807e-28	8	191	224	321	384	432	790	823	885	1338	1203	1945	975	1157	2155	915	947	379	2
MT2B2:Fbxo15	Fbxo15			X	X					chr18	84935180	84957319	MT2B2	ERVL	LTR	NA	NA	NA	+	internal/promoter_tss	2.04472	11.6332	13.988	14.4941	13.0611	14.7831	76.7049	4.09881e-15	1.37411e-13	9	0	0	0	0	2	146	156	487	535	489	2762	498	336	6560	1775	1036	155	2
MTC:Itpr2	Itpr2									chr6	146144269	146147037	NA	NA	NA	MTC	ERVL-MaLR	LTR	-	promoter_tss	0.0270442	-3.73382	-5.01248	-4.46223	-5.29177	12.5291	22.4738	0.000425401	0.00106873	10	1993	571	1130	1258	1264	32	47	13	32	1	0	2	65	6	1	1	35	0
ID_B1:Aurkc	Aurkc									chr7	6996301	6996518	ID_B1	B4	SINE	NA	NA	NA	+	internal	-0.570087	-5.31757	-2.19105	-1.6176	-4.11215	12.3438	51.9647	5.48543e-10	6.26688e-09	11	1062	1060	761	744	487	11	13	1	65	107	42	117	209	100	50	28	13	0
Lx3A:Obox1	Obox1							X	X	chr7	15548546	15555116	Lx3A	L1	LINE	NA	NA	NA	+	promoter_tss	-0.340796	-4.26411	-7.25896	-6.54489	-6.29245	11.978	57.9203	3.26685e-11	4.36648e-10	12	641	1449	924	465	918	22	19	12	2	4	0	5	8	0	3	0	13	2
B1_Mus2:Rcc2	Rcc2			X	X					chr4	140718412	140720544	NA	NA	NA	B1_Mus2	Alu	SINE	+	internal	1.07854	5.54432	6.96926	7.42417	7.93036	13.9969	103.207	1.11393e-20	1.42374e-18	13	12	10	21	7	38	132	141	287	271	288	858	425	481	1685	857	2009	1015	2
RLTR19-int:Hnrnpa3	Hnrnpa3			X	X					chr2	75665150	75665233	RLTR19-int	ERVK	LTR	RLTR19-int	ERVK	LTR	+	internal/terminator/promoter	1.04436	3.28272	4.0224	3.64885	2.69966	14.3629	116.386	1.82783e-23	7.47582e-21	14	163	194	374	260	397	569	563	639	778	757	1284	698	957	1206	827	594	293	2
MT2B1:Zbed3	Zbed3							X	X	chr13	95323770	95336055	MT2B1	ERVL	LTR	NA	NA	NA	+	promoter_tss	-0.910603	-4.08219	-7.54749	-7.91981	-11.9042	11.4197	126.781	1.14675e-25	5.86275e-23	15	678	1035	478	379	417	22	20	6	2	2	0	2	2	0	0	0	0	2
MIR:Psmd12	Psmd12			X	X					chr11	107494804	107495687	MIR	MIR	SINE	NA	NA	NA	+	internal	1.21794	6.44661	6.22581	6.22164	5.80671	14.2762	109.307	5.7398e-22	9.02915e-20	16	30	24	48	45	85	594	535	1446	527	280	1230	651	611	1364	579	971	599	2
LFSINE_Vert:Pcbp2	Pcbp2									chr15	102486040	102487087	LFSINE_Vert	tRNA	SINE	NA	NA	NA	+	internal	0.606105	-1.20705	-0.281477	-0.132319	0.196718	12.7963	7.69923	0.173609	0.18745	17	542	500	815	990	407	91	91	34	145	158	92	270	165	127	261	306	265	0
MT2_Mm:Pemt	Pemt			X	X					chr11	60031820	60040104	NA	NA	NA	MT2_Mm	ERVL	LTR	-	promoter_tss	0	8.69703	12.0922	11.8626	13.0243	13.1874	101.307	2.80221e-20	3.37089e-18	18	0	0	0	0	0	22	21	58	144	82	802	169	139	832	1346	733	618	2
L3:Rrp15	Rrp15	X			X					chr1	186721546	186736115	L3	CR1	LINE	NA	NA	NA	-	terminator	2.64243	9.52509	8.94139	8.60081	8.0543	13.8837	81.8125	3.50366e-16	1.49271e-14	19	0	6	9	27	21	432	386	1903	314	278	1023	238	323	1146	441	507	290	2
RMER17D:Unc13c	Unc13c							X	X	chr9	73526032	73530913	NA	NA	NA	RMER17D	ERVK	LTR	-	internal	0.0455884	2.49128	-1.61352	-2.53553	-6.27115	12.6479	95.6603	4.33595e-19	4.64857e-17	20	361	300	341	307	305	600	650	628	31	60	6	27	23	19	1	5	0	2
MT2B2:Cdk2ap1	Cdk2ap1									chr5	124350172	124362949	NA	NA	NA	MT2B2	ERVL	LTR	-	promoter_tss	-3.31187	8.82725	9.78936	8.94299	9.69117	13.8337	89.3687	9.11848e-18	5.4845e-16	21	2	2	0	0	0	163	187	803	345	335	1332	143	141	1253	686	1634	401	0
MT2_Mm:Rplp0	Rplp0			X	X					chr5	115557416	115559786	MT2_Mm	ERVL	LTR	NA	NA	NA	+	promoter_tss	0	11.3453	13.3988	12.9472	11.4108	13.6979	79.5857	1.02454e-15	3.95318e-14	22	0	0	0	0	0	111	113	431	251	333	1967	218	232	2039	438	440	59	2
ID_B1:Snrpa1	Snrpa1			X	X					chr7	66071325	66074321	ID_B1	B4	SINE	NA	NA	NA	+	internal	-0.592413	3.04969	2.86378	2.62928	3.13558	13.7942	93.5657	1.19622e-18	1.0636e-16	23	207	154	123	87	124	451	450	648	480	249	522	388	454	569	508	978	715	2
LFSINE_Vert:Pcbp2	Pcbp2									chr15	102484240	102485947	NA	NA	NA	LFSINE_Vert	tRNA	SINE	+	internal	0.206379	-1.63818	-0.716074	-0.424892	-0.043265	12.5279	8.62107	0.125167	0.139263	24	701	366	508	782	436	69	68	27	99	129	72	237	131	97	240	215	255	0
MTB:Spin1	Spin1							X	X	chr13	51134382	51139356	MTB	ERVL-MaLR	LTR	NA	NA	NA	+	promoter_tss	-0.230247	-0.408558	-3.04785	-4.20502	-5.79784	11.743	38.7555	2.65976e-07	1.5151e-06	25	436	673	424	395	511	114	154	163	21	36	3	3	28	7	1	1	10	2
MTD:Riok1	Riok1									chr13	38046907	38047244	MTD	ERVL-MaLR	LTR	NA	NA	NA	+	internal	1.06017	-1.85793	-4.76096	-4.37629	-8.14271	11.0773	68.0213	2.64337e-13	5.63022e-12	26	310	238	565	507	525	31	27	15	2	7	0	8	7	0	0	0	1	0
RMER21A:Tyms	Tyms			X	X					chr5	30064186	30068465	NA	NA	NA	RMER21A	ERV1	LTR	-	internal	-0.817696	3.07894	6.75579	7.27858	7.61419	13.0289	64.2946	1.56958e-12	2.6973e-11	27	10	4	1	10	0	17	13	35	53	62	725	430	304	688	510	466	885	2
MIRc:Zfp639	Zfp639							X		chr3	32517139	32519109	NA	NA	NA	MIRc	MIR	SINE	+	internal	-0.280903	6.01965	4.71964	1.95603	0.104774	12.361	92.953	1.6094e-18	1.37134e-16	28	22	21	22	11	16	365	449	668	202	212	110	21	19	72	26	10	0	1
MIR:Eif4e	Eif4e				X					chr3	138526294	138527267	MIR	MIR	SINE	NA	NA	NA	+	promoter	2.0494	11.9027	12.945	11.8283	11.085	13.2445	80.4097	6.88869e-16	2.76223e-14	29	0	0	0	1	1	170	188	596	411	253	1117	122	76	944	239	443	58	1
MTC:Tesc	Tesc							X	X	chr5	118036129	118046314	MTC	ERVL-MaLR	LTR	NA	NA	NA	+	promoter_tss	-1.6317	-1.44821	-4.66025	-2.96264	-8.8243	10.7406	40.188	1.3685e-07	8.611e-07	30	135	741	153	138	105	62	42	59	2	12	2	50	6	6	0	0	1	2
RMER21A:Tyms	Tyms			X	X					chr5	30068640	30071633	RMER21A	ERV1	LTR	NA	NA	NA	-	internal	-2.48583	2.56374	6.46229	7.22979	7.81186	12.5632	83.3092	1.70227e-16	7.5677e-15	31	9	1	0	1	1	8	6	19	21	66	404	313	163	519	441	369	731	2
MTD:Riok1	Riok1									chr13	38045315	38046850	NA	NA	NA	MTD	ERVL-MaLR	LTR	+	internal	1.06015	-1.64634	-4.9412	-4.77122	-4.33717	10.7535	42.7361	4.1792e-08	3.06944e-07	32	259	166	355	383	509	24	25	18	3	3	0	4	4	1	0	0	12	0
L3:Atf2	Atf2							X	X	chr2	73823306	73828471	L3	CR1	LINE	NA	NA	NA	-	internal	1.30178	5.56307	3.30057	2.22172	0.817955	11.8806	75.121	8.77737e-15	2.71966e-13	33	23	22	46	57	54	334	331	441	139	19	41	23	67	45	21	30	8	2
L2b:Sptan1	Sptan1			X	X					chr2	30030370	30030451	NA	NA	NA	L2b	L2	LINE	+	internal	3.06255	5.15271	6.11228	5.67929	6.2693	12.8422	126.884	1.09078e-25	5.86275e-23	34	8	16	107	97	81	125	119	214	146	246	451	226	235	332	373	529	415	2
MT2_Mm:Naa35	Naa35			X						chr13	59628014	59628917	MT2_Mm	ERVL	LTR	NA	NA	NA	+	internal	-0.62759	-0.0742875	0.453576	0.639446	0.251249	12.3806	5.53567	0.35405	0.36512	35	213	457	258	160	186	117	110	90	177	94	163	150	344	158	180	150	214	1
MIR3:Tpra1	Tpra1							X		chr6	88909760	88910150	NA	NA	NA	MIR3	MIR	SINE	+	internal	-3.35809	-5.69701	-6.58241	-7.49369	-7.72749	9.5001	87.6903	2.0526e-17	1.16599e-15	36	337	334	21	47	24	3	3	0	2	1	0	1	1	0	2	0	0	1
L3:Papd4	Papd4									chr13	93148960	93150683	NA	NA	NA	L3	CR1	LINE	-	internal	0.262663	2.52148	1.09766	1.7807	1.01703	12.6812	20.2117	0.00114042	0.00248897	37	174	174	225	196	161	276	286	492	73	176	104	89	502	169	163	145	176	0
ID_B1:Aurkc	Aurkc									chr7	6995712	6996267	NA	NA	NA	ID_B1	B4	SINE	+	internal/terminator	-0.618486	-4.09211	-1.99188	-0.804268	-2.51535	10.9281	26.0177	8.85344e-05	0.000268624	38	355	293	222	206	160	7	10	1	19	48	7	39	107	93	40	21	20	0
L3:Edrf1	Edrf1									chr7	133667691	133671365	L3	CR1	LINE	NA	NA	NA	+	internal	0.239389	-2.21206	-1.74745	-2.38291	-2.11872	11.0165	8.2223	0.144403	0.158001	39	332	257	338	323	311	32	21	6	30	30	21	59	0	0	38	43	18	0
MT2C_Mm:Ubtfl1	Ubtfl1						X	X		chr9	18404765	18409093	MT2C_Mm	ERVL	LTR	NA	NA	NA	+	internal/promoter_tss	0	12.2886	10.2278	9.03099	8.20151	11.9333	92.7876	1.74357e-18	1.42624e-16	40	0	0	0	0	0	178	180	931	78	66	115	32	9	117	50	38	11	2
MT2C_Mm:Wtap	Wtap									chr17	12985953	12994062	NA	NA	NA	MT2C_Mm	ERVL	LTR	-	promoter_tss	0	9.49485	12.3646	12.121	10.7927	12.7275	85.2002	6.83433e-17	3.40883e-15	41	0	0	0	0	0	34	43	99	192	221	795	93	103	1225	238	283	74	0
MT2B2:Bex6	Bex6									chr16	32184087	32186185	MT2B2	ERVL	LTR	NA	NA	NA	+	internal	0	12.2149	11.4803	11.4389	10.7628	12.7159	69.6846	1.19194e-13	2.93678e-12	42	0	0	0	0	0	148	219	853	210	180	214	35	42	822	148	305	112	0
MTE2b:Pak2	Pak2									chr16	32050438	32052175	MTE2b	ERVL-MaLR	LTR	NA	NA	NA	-	terminator	0	12.3804	9.82301	8.75523	7.47531	11.8986	72.5071	3.0797e-14	8.62737e-13	43	0	0	0	0	0	100	93	1256	44	26	136	12	27	94	30	2	22	0
MTD:Cenpa	Cenpa									chr5	30669828	30672463	MTD	ERVL-MaLR	LTR	NA	NA	NA	+	internal	-0.233522	6.29918	4.39022	4.08176	4.57634	12.0784	48.6719	2.58968e-09	2.64795e-08	44	9	15	4	23	2	205	162	715	47	95	108	145	14	85	116	148	139	0
PB1D7:Becn2	Becn2									chr1	175921688	175921796	NA	NA	NA	PB1D7	Alu	SINE	+	terminator	4.11511	12.0563	11.2323	11.9069	11.635	12.8914	71.0002	6.34506e-14	1.68515e-12	45	0	0	7	0	3	170	157	760	96	69	390	190	188	783	255	620	172	0
ORR1A1:Zfand6	Zfand6									chr7	84632756	84633884	NA	NA	NA	ORR1A1	ERVL-MaLR	LTR	-	internal	1.17073	2.27127	2.19918	0.961393	0.815866	12.2804	14.1212	0.0148578	0.0220496	46	172	78	163	362	272	187	248	166	260	155	103	35	179	99	112	128	75	0
B4A:Mrpl45	Mrpl45									chr11	97323949	97325708	B4A	B4	SINE	NA	NA	NA	+	internal	0.190638	1.45357	3.32886	1.91299	1.50822	12.113	75.5812	7.03576e-15	2.21356e-13	47	110	58	79	116	74	78	85	67	206	270	338	139	99	155	111	145	85	0
ID_B1:3110009E18Rik	3110009E18Rik			X						chr1	120160400	120160605	ID_B1	B4	SINE	NA	NA	NA	+	promoter_tss	-0.900691	-2.48233	-4.62609	-3.92349	-7.15436	9.91453	56.5724	6.19457e-11	8.06872e-10	48	155	336	137	127	104	18	15	10	3	5	1	8	10	1	0	0	2	1
ORR1C1:Cnot10	Cnot10									chr9	114586339	114591515	ORR1C1	ERVL-MaLR	LTR	NA	NA	NA	-	terminator	1.20266	6.56379	6.4793	6.65879	7.62566	11.9365	35.4646	1.21527e-06	5.83387e-06	49	0	6	0	1	20	62	50	234	41	80	171	130	50	242	264	283	328	0
Lx6:AI987944	AI987944		X					X	X	chr7	41376872	41388107	NA	NA	NA	Lx6	L1	LINE	-	internal	0.653575	-1.52241	-6.06291	-5.48888	-7.37561	10.0773	113.127	8.94032e-23	2.58386e-20	50	208	108	279	218	193	22	18	14	1	1	0	2	2	0	0	0	1	3
B4:Fam50a	Fam50a			X	X					chrX	74317703	74318141	NA	NA	NA	B4	B4	SINE	+	internal	5.18008	8.15544	10.1653	8.30746	8.85331	11.9855	94.1914	8.83472e-19	8.21227e-17	51	0	1	25	22	26	62	56	98	224	90	521	117	34	134	179	191	112	2
MIRc:Scpep1	Scpep1									chr11	88929328	88930207	MIRc	MIR	SINE	NA	NA	NA	-	internal	-0.212042	2.48146	4.06754	3.06424	3.55529	12.2211	59.4697	1.56425e-11	2.25274e-10	52	50	37	36	32	37	86	76	84	221	125	370	234	59	140	349	229	165	0
MT2_Mm:Guca1a	Guca1a									chr17	47400446	47402809	NA	NA	NA	MT2_Mm	ERVL	LTR	-	promoter_tss	0	10.3926	10.8705	10.9728	11.2743	12.0667	90.194	6.11752e-18	4.17011e-16	53	0	0	0	0	0	61	59	216	97	45	284	78	94	445	287	355	164	0
MIRb:Rpl13a	Rpl13a			X	X					chr7	45126537	45126990	MIRb	MIR	SINE	NA	NA	NA	-	internal	-1.68931	6.87095	8.46654	8.46537	9.50758	11.4537	65.1278	1.05436e-12	1.89138e-11	54	1	0	0	0	0	23	14	55	37	5	230	127	83	100	180	254	279	2
MLT1J2:Rbpms2	Rbpms2								X	chr9	65650624	65650932	NA	NA	NA	MLT1J2	ERVL-MaLR	LTR	+	internal	2.71662	2.66175	1.75462	3.02202	1.64209	11.0889	21.5902	0.000626339	0.00149634	55	33	28	145	171	254	79	58	55	32	21	47	112	140	46	68	46	26	1
L2:Nsmce2	Nsmce2									chr15	59376571	59378867	L2	L2	LINE	NA	NA	NA	+	promoter_tss	-0.00194789	-1.35685	-5.03191	-4.91738	-6.85781	10.0045	76.5004	4.52254e-15	1.49171e-13	56	239	132	174	148	196	31	24	15	2	3	0	4	3	0	1	1	0	0
B1F2:Smarcad1	Smarcad1				X					chr6	65043445	65043835	NA	NA	NA	B1F2	Alu	SINE	+	terminator	0	10.4589	11.5342	10.9314	11.1302	12.2185	83.4362	1.60117e-16	7.27643e-15	57	0	0	0	0	0	53	59	246	121	109	448	64	66	479	198	290	214	1
ID_B1:Aurkc	Aurkc									chr7	6995548	6996267	NA	NA	NA	ID_B1	B4	SINE	+	internal	-0.370466	-6.29675	-7.12338	-3.32814	-6.84737	9.55331	41.5374	7.30653e-08	5.04792e-07	58	194	165	145	138	104	1	1	0	0	1	0	1	21	0	2	0	0	0
MIRb:Anapc15	Anapc15									chr7	101897817	101897941	MIRb	MIR	SINE	NA	NA	NA	+	internal/promoter_tss	1.86703	4.45954	5.12272	4.17883	4.30406	12.1705	111.936	1.59687e-22	3.05655e-20	59	16	21	64	64	63	118	111	205	148	141	359	118	153	155	156	170	183	0
CR1_Mam:Srsf10	Srsf10							X		chr4	135863576	135867125	NA	NA	NA	CR1_Mam	CR1	LINE	+	terminator	-0.211777	4.97723	3.27015	4.77052	3.97532	11.6672	54.4215	1.71673e-10	2.11489e-09	60	16	14	15	5	16	100	74	366	8	63	76	174	187	148	112	117	105	1
MT2B2:Ube2e3	Ube2e3									chr2	78864088	78870456	MT2B2	ERVL	LTR	NA	NA	NA	+	promoter_tss	0	11.4231	11.2114	10.518	9.21489	11.9652	80.1113	7.95391e-16	3.12803e-14	61	0	0	0	0	0	99	113	490	131	79	322	32	71	357	66	95	34	0
MT2B1:Tcstv1	Tcstv1						X	X	X	chr13	119894122	119894645	NA	NA	NA	MT2B1	ERVL	LTR	-	internal/promoter_tss	0.79209	-0.952644	-0.952176	-4.59187	-5.53312	9.94949	29.3803	1.95253e-05	7.09221e-05	62	114	103	172	204	151	25	21	7	43	1	4	3	2	0	2	0	1	3
RLTR41C:Gps1	Gps1									chr11	120786687	120786771	RLTR41C	ERV1	LTR	RLTR41C	ERV1	LTR	+	internal	-0.0364144	1.21103	0.727506	0.687508	0.694801	11.8818	8.47675	0.131845	0.145271	63	188	154	154	175	138	146	129	120	111	64	90	144	110	75	128	131	126	0
ERVB4_1B-LTR_MM:Psmd2	Psmd2			X	X					chr16	20660102	20660342	ERVB4_1B-LTR_MM	ERVK	LTR	NA	NA	NA	+	internal	1.2464	0.276397	2.16704	2.14767	3.10238	11.4884	46.2828	7.95432e-09	7.01146e-08	64	52	53	117	120	113	24	24	15	40	108	79	91	119	77	293	177	174	2
MTD:D6Ertd527e	D6Ertd527e					X		X	X	chr6	87104842	87110876	MTD	ERVL-MaLR	LTR	NA	NA	NA	+	promoter_tss	-1.76162	-3.88634	-7.04201	-6.50799	-7.46575	8.95157	89.6953	7.78631e-18	4.97594e-16	65	149	187	62	38	37	5	4	2	0	1	0	1	1	0	0	0	1	3
MTB:Aspm	Aspm									chr1	139483622	139485699	MTB	ERVL-MaLR	LTR	NA	NA	NA	+	promoter_tss	2.33217	-1.64062	-1.30369	-5.1462	-4.44002	9.31156	57.3554	4.27195e-11	5.60009e-10	66	48	24	165	139	206	4	6	1	4	9	0	0	1	0	1	0	1	0
PB1D10:Ypel2	Ypel2			X	X					chr11	86951517	86971808	PB1D10	Alu	SINE	NA	NA	NA	-	terminator	0.231624	-1.4888	0.641403	0.738316	-0.240079	11.2524	9.36255	0.0954482	0.108985	67	204	106	175	195	138	21	24	8	63	115	45	165	31	112	70	48	63	2
ID_B1:Rmnd1	Rmnd1							X	X	chr10	4403990	4407804	NA	NA	NA	ID_B1	B4	SINE	-	internal	4.27662	9.55019	7.67489	5.8731	7.01023	11.0478	40.5433	1.16025e-07	7.50857e-07	68	0	1	1	16	23	122	98	385	50	39	51	36	0	12	32	46	49	2
MLT2B5:Rpa3	Rpa3									chr6	8256247	8256694	MLT2B5	ERVL	LTR	NA	NA	NA	-	terminator	-1.02024	0.266617	-0.337808	0.984825	-0.00115552	11.2747	4.20573	0.520193	0.527675	69	125	196	82	82	57	54	38	117	1	99	20	160	163	53	68	38	105	0
MT2B1:Pkd2l2	Pkd2l2							X	X	chr18	34408667	34412680	MT2B1	ERVL	LTR	NA	NA	NA	+	promoter_tss	1.74933	-4.57379	-3.93862	-3.39064	-5.79377	9.25248	112.038	1.51961e-22	3.05655e-20	70	59	46	199	169	124	1	1	0	1	2	0	2	2	2	0	0	1	2
L3:Ckap5	Ckap5									chr2	91601126	91606245	NA	NA	NA	L3	CR1	LINE	+	internal	-1.11413	-0.910497	-0.956982	-1.85511	-1.3808	10.1717	2.14499	0.828741	0.829958	71	104	211	78	86	39	43	21	16	41	0	36	19	32	0	31	32	23	0
MTA_Mm:Mtus2	Mtus2							X	X	chr5	148305618	148306629	MTA_Mm	ERVL-MaLR	LTR	NA	NA	NA	+	promoter_tss	1.17596	-0.0636398	-3.01805	-3.63251	-5.49989	9.6785	46.6826	6.59419e-09	5.99339e-08	72	94	57	142	140	198	28	28	14	7	1	0	3	4	0	0	1	1	2
LTRIS_Mus:Ago2	Ago2		X	X	X					chr15	73108473	73111686	LTRIS_Mus	ERV1	LTR	NA	NA	NA	-	internal	-0.397847	4.56193	5.69002	5.58293	4.50312	11.7172	77.4406	2.87721e-15	1.03226e-13	73	16	2	5	7	7	57	63	109	118	70	286	71	181	337	125	118	60	3
MTE2a-int:Nfx1	Nfx1									chr4	41009269	41012057	NA	NA	NA	MTE2a-int	ERVL-MaLR	LTR	+	terminator	3.25964	8.90234	9.5315	9.34716	8.57404	11.9882	49.7657	1.54752e-09	1.67444e-08	74	1	0	15	3	0	74	87	217	155	100	268	107	33	506	148	160	89	0
L1MB3:Nrg4	Nrg4							X	X	chr9	55226754	55227852	L1MB3	L1	LINE	NA	NA	NA	-	internal	1.66458	-0.210669	0.27208	0.181942	-5.02818	9.8786	19.0606	0.00187284	0.0038338	75	60	42	150	151	153	22	12	8	32	0	26	26	39	3	2	0	0	2
ID_B1:Aurkc	Aurkc									chr7	6995834	6996267	NA	NA	NA	ID_B1	B4	SINE	+	internal	-0.621121	-4.49713	-2.05705	0.0936489	-2.56895	10.0644	26.3129	7.75913e-05	0.000241146	76	120	171	100	102	62	3	3	0	12	14	6	68	68	54	25	13	0	0
RLTR41C:Gps1	Gps1									chr11	120786849	120787008	RLTR41C	ERV1	LTR	NA	NA	NA	+	internal	0.130802	1.63631	0.80832	0.595842	0.95803	11.667	16.7483	0.0050027	0.00871135	77	146	112	137	135	123	139	129	137	82	64	65	96	82	57	117	111	119	0
MT2B:Atad2	Atad2						X	X		chr15	58097385	58098358	NA	NA	NA	MT2B	ERVL	LTR	-	internal	-0.648632	3.92425	3.15064	2.50559	0.782753	11.1532	51.0076	8.61778e-10	9.52614e-09	78	27	28	16	16	17	133	105	202	51	71	120	117	21	43	16	44	10	2
MTA_Mm:Pakap	Pakap									chr4	57865352	57883023	MTA_Mm	ERVL-MaLR	LTR	NA	NA	NA	+	promoter_tss	0.181316	-1.13641	-5.80147	-4.43344	-7.11453	9.66269	91.3514	3.49431e-18	2.74841e-16	79	150	113	135	139	144	24	19	16	1	1	0	4	3	0	0	0	1	0
B1_Mur1:C87436	C87436								X	chr6	86464170	86465800	B1_Mur1	Alu	SINE	NA	NA	NA	+	promoter	1.99727	-0.365418	-2.45726	-1.67574	-5.29065	9.23341	69.2593	1.46132e-13	3.43494e-12	80	43	31	153	117	144	11	12	5	3	3	0	5	6	3	0	0	1	1
MT2C_Mm:Pramel4	Pramel4									chr4	144059227	144065731	MT2C_Mm	ERVL	LTR	NA	NA	NA	+	promoter_tss	0	8.17979	8.76287	10.8587	9.57485	10.8825	83.5422	1.52133e-16	7.20198e-15	81	0	0	0	0	0	16	15	39	9	33	56	80	91	395	121	107	29	0
MTA_Mm-int:Pakap	Pakap									chr4	57864787	57883023	MTA_Mm-int	ERVL-MaLR	LTR	NA	NA	NA	+	promoter_tss	0.20295	-1.27359	-1.77383	-4.55028	-3.69055	9.76441	16.117	0.00651781	0.0109164	82	115	135	142	121	140	14	13	28	1	29	4	3	3	0	0	0	11	0
MT2B2:Ap1m2	Ap1m2									chr9	21299437	21302455	MT2B2	ERVL	LTR	NA	NA	NA	-	internal	0.507435	2.19791	2.92277	1.68183	2.01543	11.4986	22.0384	0.000514881	0.00125498	83	45	62	60	65	90	85	93	67	155	133	86	103	21	85	91	145	75	0
LTR108e_Mam:Taf1a	Taf1a									chr1	183405962	183406543	NA	NA	NA	LTR108e_Mam	ERVL	LTR	+	internal/terminator	1.26465	2.01966	2.70747	1.4963	1.14764	11.4329	13.0721	0.0227127	0.0318134	84	73	45	118	134	147	81	92	65	90	203	63	105	18	77	73	71	44	0
MIR3:Sltm	Sltm				X					chr9	70562861	70572148	MIR3	MIR	SINE	NA	NA	NA	+	internal/promoter_tss	-1.14456	4.17863	4.69465	3.02523	3.24752	11.2308	37.4389	4.89061e-07	2.62106e-06	85	6	24	3	15	1	73	93	123	87	204	77	27	20	122	78	123	19	1
Lx3C:Gm2042	Gm2042							X	X	chr12	87954582	87955402	NA	NA	NA	Lx3C	L1	LINE	+	internal	2.03365	3.262	-0.578413	-0.0229814	-3.38077	10.4768	25.3511	0.000119183	0.000350185	86	30	39	136	133	129	98	55	208	2	14	6	35	1	0	1	0	3	2
Lx8:Ints4	Ints4	X			X					chr7	97529294	97530299	NA	NA	NA	Lx8	L1	LINE	+	internal	2.17073	3.82175	4.54939	2.5406	3.94066	11.4674	135.557	1.57343e-27	1.60884e-24	87	20	15	74	75	74	79	90	85	146	116	127	39	41	49	148	157	87	2
ID_B1:Ddb1	Ddb1			X						chr19	10625990	10626591	NA	NA	NA	ID_B1	B4	SINE	+	internal	-1.21231	-2.40664	-0.249147	-1.20023	-0.669184	9.99835	8.22631	0.144196	0.157859	88	98	149	53	49	47	9	12	1	36	47	11	17	25	26	64	47	8	1
MTC:Slc4a8	Slc4a8									chr15	100812378	100813106	MTC	ERVL-MaLR	LTR	NA	NA	NA	+	promoter_tss	3.33674	-5.87816	-2.47246	-1.85853	-0.889512	8.77984	31.239	8.40232e-06	3.36917e-05	89	19	7	83	119	175	0	0	0	0	2	0	2	2	0	0	0	8	0
MT2B:Nfyc	Nfyc									chr4	120790489	120831440	NA	NA	NA	MT2B	ERVL	LTR	-	promoter_tss	1.34158	0.861457	3.13515	2.95494	4.18324	10.8012	68.9357	1.70623e-13	3.87693e-12	90	13	22	37	43	46	12	12	8	43	43	64	70	39	59	167	99	173	0
B3:Taf1d	Taf1d				X					chr9	15306990	15307727	B3	B2	SINE	NA	NA	NA	+	internal/promoter	-0.205182	3.63936	3.6295	2.40271	1.53586	11.2778	108.36	9.10012e-22	1.32927e-19	91	28	29	26	26	17	95	107	175	93	107	142	30	87	79	32	55	31	1
ORR1A2:Zfp644	Zfp644				X		X			chr5	106638635	106655018	NA	NA	NA	ORR1A2	ERVL-MaLR	LTR	-	promoter_tss	0	10.8626	9.82096	8.86651	2.82014	10.8354	70.6276	7.58599e-14	1.98889e-12	92	0	0	0	0	0	60	81	337	25	103	67	9	14	125	0	2	0	2
X6A_LINE:Atf2	Atf2							X	X	chr2	73863238	73873669	NA	NA	NA	X6A_LINE	CR1	LINE	-	internal	0.0403143	6.07765	3.93678	2.42004	1.15612	10.1047	19.1898	0.00177174	0.00364142	93	9	0	3	6	4	114	117	81	59	0	1	14	0	17	10	6	0	2
LTR78B:Map2k1	Map2k1								X	chr9	64212730	64214398	NA	NA	NA	LTR78B	ERV1	LTR	-	internal/promoter_tss	-1.60757	-4.05699	-5.75432	-1.38083	-3.8902	8.9496	19.3742	0.00163674	0.00340848	94	102	132	48	36	22	3	1	3	0	0	2	29	20	2	0	0	9	1
B3:Rif1	Rif1							X		chr2	52090284	52092041	NA	NA	NA	B3	B2	SINE	+	internal	0.158794	1.35668	1.03986	-1.66106	-0.657184	11.0494	24.9742	0.000140942	0.000406525	95	134	95	136	124	96	96	122	72	96	90	25	19	10	15	32	48	24	1
ID_B1:Mylpf	Mylpf				X					chr7	127212707	127212860	ID_B1	B4	SINE	NA	NA	NA	+	promoter_tss	0	2.42828	6.16704	7.72971	10.4885	9.96437	109.35	5.62052e-22	9.02915e-20	96	0	0	0	0	0	0	1	0	3	8	4	6	18	40	112	238	110	1
MTC:Unc13c	Unc13c							X	X	chr9	73639185	73645298	NA	NA	NA	MTC	ERVL-MaLR	LTR	-	promoter_tss	0.0933308	2.1234	-1.43012	-3.86072	-8.35304	10.2559	55.7606	9.10349e-11	1.16354e-09	97	73	73	66	83	70	105	116	99	21	2	0	2	2	2	0	0	0	2
L3b:Chic2	Chic2									chr5	75011290	75011452	L3b	CR1	LINE	NA	NA	NA	-	internal	1.6834	2.40887	1.71131	3.11692	3.86363	10.898	20.3038	0.00109583	0.00241225	98	26	16	53	87	51	37	37	40	34	9	21	21	169	43	133	79	195	0
MIRc:Dmwd	Dmwd							X	X	chr7	19081993	19082275	MIRc	MIR	SINE	NA	NA	NA	+	internal	-1.20891	-0.0150354	0.0292016	0.156925	0.105092	10.5886	5.14839	0.39804	0.408425	99	95	133	36	63	40	36	35	45	13	72	25	54	58	44	45	45	74	2
B1_Mur3:Tomm5	Tomm5	X			X					chr4	45105644	45106838	NA	NA	NA	B1_Mur3	Alu	SINE	-	internal	0	9.56522	10.4221	10.453	9.74286	11.2653	71.8249	4.27238e-14	1.16494e-12	100	0	0	0	0	0	28	24	143	17	58	250	62	122	233	131	83	63	2
L3:Rnaseh2a	Rnaseh2a									chr8	84958089	84959775	NA	NA	NA	L3	CR1	LINE	-	internal	1.39887	8.24005	9.85025	8.63987	10.4083	10.7217	37.2038	5.45162e-07	2.88076e-06	101	0	0	1	0	0	20	24	25	150	8	20	43	0	71	90	167	157	0
MTC:Umodl1	Umodl1							X		chr17	31002051	31002811	MTC	ERVL-MaLR	LTR	NA	NA	NA	+	promoter_tss	3.96804	0.582801	2.95075	-0.314924	-0.387757	9.14214	26.9619	5.80258e-05	0.000186284	102	11	4	125	66	145	3	7	1	31	18	3	1	1	6	0	1	6	1
MTB_Mm:Mbd3l2	Mbd3l2							X	X	chr9	18430742	18443507	MTB_Mm	ERVL-MaLR	LTR	NA	NA	NA	+	promoter_tss	-0.319018	-3.37107	-5.5275	-5.32808	-8.93541	8.94728	68.6907	1.91863e-13	4.31165e-12	103	119	100	100	56	88	5	4	1	1	1	0	2	1	0	0	0	0	2
L1Md_F:Acer2	Acer2				X					chr4	86930842	86932031	L1Md_F	L1	LINE	L1Md_F	L1	LINE	+	terminator/promoter_tss	-1.68995	5.58033	9.17916	9.00736	7.98351	11.3022	89.49	8.59912e-18	5.32885e-16	104	1	0	0	0	0	9	11	16	79	75	271	85	27	398	90	113	60	1
MIRb:Eif4e2	Eif4e2									chr1	87214495	87219580	MIRb	MIR	SINE	NA	NA	NA	+	promoter	2.60007	7.68164	8.60951	7.94034	8.65649	11.147	46.6438	6.7151e-09	6.04951e-08	105	1	0	0	0	12	28	33	104	37	94	151	25	61	155	181	142	97	0
MTA_Mm:Fnbp4	Fnbp4									chr2	90776849	90777564	MTA_Mm	ERVL-MaLR	LTR	NA	NA	NA	+	promoter_tss	-1.11775	-8.90039	-5.46649	-5.30381	-3.91959	8.58881	30.931	9.66579e-06	3.83816e-05	106	75	138	70	41	24	0	0	0	1	1	0	1	2	0	0	0	8	0
MIRc:Eif2ak4	Eif2ak4							X	X	chr2	118457242	118457825	MIRc	MIR	SINE	NA	NA	NA	+	internal	-0.371107	-2.98096	-5.49783	-5.85135	-6.0705	8.91963	71.2643	5.59029e-14	1.50423e-12	107	77	136	99	65	65	6	5	2	1	1	0	1	1	0	2	0	0	2
MT2B2:Ocm	Ocm									chr5	144025713	144050480	NA	NA	NA	MT2B2	ERVL	LTR	-	promoter_tss	0	8.63798	5.63252	7.98751	10.311	10.1459	112.875	1.0108e-22	2.58386e-20	108	0	0	0	0	0	21	23	52	6	2	2	7	25	44	183	143	87	0
MIR3:Sltm	Sltm				X					chr9	70561973	70562813	NA	NA	NA	MIR3	MIR	SINE	+	internal/terminator	-1.67662	4.08159	4.36845	3.21368	2.92794	11.0541	31.2802	8.24652e-06	3.31971e-05	109	8	22	1	12	0	67	82	123	52	181	62	30	22	141	67	97	13	1
MTA_Mm:Lonp2	Lonp2									chr8	86704265	86708932	MTA_Mm	ERVL-MaLR	LTR	NA	NA	NA	+	promoter_tss	1.28971	1.3231	-0.810509	-1.38867	-2.75642	9.65275	15.539	0.00829125	0.0134855	110	48	43	72	117	127	34	49	31	20	2	0	3	6	14	1	0	7	0
MT2B1:Tcstv1	Tcstv1						X	X	X	chr13	119894805	119896138	MT2B1	ERVL	LTR	MTA_Mm	ERVL-MaLR	LTR	-	internal/promoter_tss	0.765184	-0.976274	-4.82146	-5.17525	-8.21864	9.07442	90.5572	5.13178e-18	3.61879e-16	111	68	65	108	101	108	14	12	7	1	1	0	1	1	0	0	0	0	3
B1_Mur4:Bcas3	Bcas3			X	X					chr11	85495961	85496872	NA	NA	NA	B1_Mur4	Alu	SINE	+	terminator	1.24214	5.54954	7.31345	7.21949	7.32503	11.1243	42.4774	4.71529e-08	3.40734e-07	112	3	0	0	11	0	18	24	44	58	83	126	29	52	276	178	114	101	2
RLTR20C1_MM:Cul5	Cul5			X	X					chr9	53658680	53669850	NA	NA	NA	RLTR20C1_MM	ERVK	LTR	-	promoter_tss	0.0827998	0.433487	1.3941	2.32751	-0.281254	10.4947	14.1607	0.01462	0.0217775	113	53	45	52	52	41	28	27	8	30	55	37	77	125	109	38	25	0	2
MT2C_Mm:C1d	C1d									chr11	17248268	17262647	MT2C_Mm	ERVL	LTR	NA	NA	NA	+	promoter_tss	0	10.4825	10.73	9.70337	10.049	11.4566	78.4123	1.80256e-15	6.58255e-14	114	0	0	0	0	0	64	60	235	63	90	231	79	12	150	119	179	53	0
MIRc:Dmwd	Dmwd							X	X	chr7	19081301	19081918	NA	NA	NA	MIRc	MIR	SINE	+	internal	-1.08729	-0.0756654	0.0689118	-1.02332	0.0379097	10.2376	2.89749	0.715786	0.720011	115	88	114	34	66	34	24	38	37	19	69	9	2	48	14	29	28	76	2
PB1D7:H1foo	H1foo									chr6	115947036	115947634	PB1D7	Alu	SINE	NA	NA	NA	+	promoter	-3.81635	-5.49569	-3.52892	-3.01024	-5.36571	8.23366	47.1605	5.26906e-09	4.9202e-08	116	72	128	11	6	2	1	1	0	2	4	2	5	7	3	0	1	2	0
RSINE1:Rb1cc1	Rb1cc1				X					chr1	6265775	6268697	RSINE1	B4	SINE	NA	NA	NA	+	internal	0.0549547	6.68468	8.14689	7.4138	6.57968	10.9782	61.2041	6.85181e-12	1.09468e-10	117	0	2	0	0	3	31	38	65	73	96	174	22	58	210	73	97	10	1
MTD:Zfp957	Zfp957							X	X	chr14	79223863	79247216	NA	NA	NA	MTD	ERVL-MaLR	LTR	-	promoter_tss	-0.0681038	-5.45712	-5.36555	-5.71917	-6.67676	8.86409	91.2115	3.73913e-18	2.83204e-16	118	123	72	98	70	91	1	1	0	1	1	0	1	1	0	0	0	1	2
L2c:Dda1	Dda1								X	chr8	71473836	71474487	L2c	L2	LINE	NA	NA	NA	+	internal	-0.0117687	0.639071	0.188887	0.902539	0.849145	10.9374	2.68067	0.749074	0.752755	119	83	110	105	86	76	64	47	36	51	9	44	62	136	20	84	103	62	1
ID_B1:Pabpc4	Pabpc4			X	X					chr4	123263393	123286679	ID_B1	B4	SINE	NA	NA	NA	+	internal/promoter	0.300313	-2.26912	-1.22773	-5.03187	-3.78067	9.25461	26.1551	8.32634e-05	0.000254378	120	124	48	117	76	101	6	9	2	7	25	1	1	1	1	8	0	1	2
ORR1A4-int:Enox1	Enox1								X	chr14	77573117	77577611	ORR1A4-int	ERVL-MaLR	LTR	NA	NA	NA	+	promoter_tss	2.81417	0.75136	-2.65326	-2.06545	-3.95211	8.68709	70.3563	8.63947e-14	2.1812e-12	121	14	15	78	68	146	9	7	9	0	2	0	2	2	0	0	0	1	1
B4:Ndufa7	Ndufa7									chr17	33825650	33829666	B4	B4	SINE	NA	NA	NA	+	internal	2.16636	-2.45028	6.0064	5.74215	7.72221	10.0382	75.9662	5.84691e-15	1.89793e-13	122	1	1	2	8	5	0	0	0	9	20	51	34	15	31	82	51	195	0
HAL1ME:Cstf3	Cstf3									chr2	104608972	104609090	HAL1ME	L1	LINE	HAL1ME	L1	LINE	+	internal/terminator	2.50952	10.1392	10.5351	7.58501	7.11375	10.7009	46.7506	6.38708e-09	5.91022e-08	123	0	0	0	3	0	30	47	216	87	81	156	0	29	29	29	3	12	0
MTD:Cenpa	Cenpa									chr5	30667113	30669691	NA	NA	NA	MTD	ERVL-MaLR	LTR	+	internal	-0.837814	5.45434	4.80691	3.97718	5.2495	11.074	28.7863	2.55369e-05	9.03513e-05	124	1	12	3	6	1	72	60	193	51	69	59	88	0	33	91	121	137	0
B1F:Gpr137c	Gpr137c							X	X	chr14	45220418	45223227	NA	NA	NA	B1F	Alu	SINE	+	terminator	-1.82594	-3.03973	-6.19574	-5.66142	-6.61898	8.29075	64.129	1.69869e-12	2.89484e-11	125	99	88	18	37	19	5	4	2	0	1	0	1	1	0	0	0	1	2
SRV_MM-int:Tmem184c	Tmem184c				X		X	X		chr8	77598653	77599656	SRV_MM-int	ERVK	LTR	SRV_MM-int	ERVK	LTR	-	internal	-1.21068	3.498	3.21891	1.02926	1.28481	10.5888	25.0395	0.000136908	0.000396567	126	17	29	15	10	2	90	83	93	48	67	96	9	41	9	58	31	0	3
MTB_Mm:Adh5	Adh5								X	chr3	138437282	138445289	MTB_Mm	ERVL-MaLR	LTR	NA	NA	NA	+	promoter_tss	0.288183	-1.7341	-5.08398	-1.49972	-8.50901	9.16017	32.5454	4.63232e-06	1.98597e-05	127	97	66	50	132	101	12	8	3	1	1	0	28	1	2	0	0	0	1
SRV_MM-int:Tmem184c	Tmem184c				X		X	X		chr8	77597980	77598553	SRV_MM-int	ERVK	LTR	SRV_MM-int	ERVK	LTR	-	internal	-1.9613	3.52546	2.99662	1.32022	1.33819	10.7177	62.9908	2.92395e-12	4.94005e-11	128	22	30	10	7	1	65	70	197	32	91	80	13	40	31	43	29	23	3
MIR3:Lsm6	Lsm6									chr8	78813080	78819986	NA	NA	NA	MIR3	MIR	SINE	-	internal/promoter_tss	-0.282485	1.86445	1.59237	2.20924	2.96931	10.6977	24.6867	0.000160139	0.000456106	129	17	46	12	24	38	37	35	47	45	14	30	37	80	71	79	68	175	0
PB1D7:Kif1bp	Kif1bp									chr10	62562717	62563235	PB1D7	Alu	SINE	NA	NA	NA	-	terminator	0	10.435	8.8859	7.82037	8.81227	10.4904	60.3127	1.04741e-11	1.61049e-10	130	0	0	0	0	0	59	64	224	51	18	28	20	1	45	34	62	44	0
LFSINE_Vert:Sorl1	Sorl1							X	X	chr9	41977610	41979329	NA	NA	NA	LFSINE_Vert	tRNA	SINE	-	internal	0.035829	-4.11058	-5.24531	-5.59808	-2.05385	9.00081	39.4763	1.90427e-07	1.13535e-06	131	97	84	85	97	78	2	2	1	1	1	0	1	1	0	8	0	19	2
MIRb:Ifrd1	Ifrd1									chr12	40217482	40247799	NA	NA	NA	MIRb	MIR	SINE	-	internal	-0.430933	-2.66819	-5.23806	-5.59084	-3.71113	8.75568	35.5275	1.18061e-06	5.70767e-06	132	92	88	71	62	53	5	5	4	1	1	0	1	1	0	0	0	8	0
MT2C_Mm:Guca1a	Guca1a									chr17	47400446	47402115	NA	NA	NA	MT2C_Mm	ERVL	LTR	-	promoter_tss	0	7.09561	8.02386	8.20378	10.1056	10.0136	114.516	4.54652e-23	1.54961e-20	133	0	0	0	0	0	8	9	15	19	11	26	19	12	56	107	161	85	0
MTB:Smarca2	Smarca2							X	X	chr19	26745309	26751823	MTB	ERVL-MaLR	LTR	NA	NA	NA	+	promoter_tss	1.01664	0.830634	-3.40466	-3.79826	-5.71008	9.23625	76.9913	3.57147e-15	1.25925e-13	134	58	38	96	71	105	31	30	24	2	2	0	1	3	0	0	1	0	2
MT2C_Mm:Zfp458	Zfp458									chr13	67228422	67229867	NA	NA	NA	MT2C_Mm	ERVL	LTR	-	internal/promoter_tss	1.38499	9.72973	10.4484	9.45731	10.0894	11.1475	91.0405	4.06165e-18	2.96645e-16	135	0	0	1	0	0	41	46	121	51	83	180	32	40	140	139	199	32	0
B3:Tmem128	Tmem128									chr5	38267284	38267697	NA	NA	NA	B3	B2	SINE	+	terminator	0.870328	4.5204	6.5154	4.95972	8.39986	9.83481	60.3486	1.02965e-11	1.59518e-10	136	0	1	3	0	0	5	5	7	18	22	23	18	0	8	91	167	90	0
MTC-int:Borcs5	Borcs5									chr6	134639687	134644328	MTC-int	ERVL-MaLR	LTR	NA	NA	NA	+	promoter_tss	-0.517953	-3.77687	-5.21848	-5.57177	-8.62496	8.57569	66.5725	5.28631e-13	1.02957e-11	137	67	109	62	54	56	3	3	0	1	1	0	1	1	0	0	0	0	0
MTC:Dicer1	Dicer1									chr12	104724070	104727302	NA	NA	NA	MTC	ERVL-MaLR	LTR	-	promoter_tss	0.188209	-3.49069	-5.15075	-5.5036	-8.56543	8.86014	59.394	1.62157e-11	2.31895e-10	138	128	42	93	91	86	3	4	0	1	1	0	1	1	0	0	0	0	0
L3b:Chic2	Chic2									chr5	75006763	75011230	NA	NA	NA	L3b	CR1	LINE	-	internal	1.75088	2.66136	2.00608	3.22504	3.57958	10.7956	16.2559	0.00615018	0.0103871	139	21	18	44	91	52	41	39	47	36	10	28	20	176	37	120	62	135	0
ORR1A4:Klhl10	Klhl10			X						chr11	100455871	100456283	ORR1A4	ERVL-MaLR	LTR	NA	NA	NA	+	promoter_tss	0	7.85274	10.2768	6.66554	7.91477	10.0213	65.5223	8.7325e-13	1.62345e-11	140	0	0	0	0	0	8	15	34	39	141	86	0	11	20	37	24	17	1
MT2C_Mm:Gm13102	Gm13102									chr4	144099980	144106507	MT2C_Mm	ERVL	LTR	NA	NA	NA	+	promoter_tss	0	6.78084	9.29097	10.4942	9.44328	10.6706	72.762	2.72516e-14	7.96137e-13	141	0	0	0	0	0	7	9	9	53	21	60	44	26	385	88	98	42	0
RLTR12BD_Mm:Nrg4	Nrg4							X	X	chr9	55225592	55226615	RLTR12BD_Mm	ERVK	LTR	L1MB3	L1	LINE	-	internal/terminator	1.11897	-0.321349	-0.726773	-0.642387	-7.60871	9.17387	22.8769	0.000356359	0.000914373	142	45	42	93	88	84	17	11	5	16	0	8	11	21	1	0	0	0	2
ORR1A2:Baz1a	Baz1a									chr12	54935581	54937565	NA	NA	NA	ORR1A2	ERVL-MaLR	LTR	-	promoter_tss	-2.45739	4.59285	4.69342	3.87749	3.72027	11.1046	53.416	2.76274e-10	3.26578e-09	143	20	2	3	2	0	60	71	161	43	117	122	51	28	137	63	125	30	0
MT2B:Ppm1a	Ppm1a									chr12	72736004	72783682	MT2B	ERVL	LTR	NA	NA	NA	+	promoter_tss	0	8.62461	10.2741	10.3671	9.18249	10.9593	73.2518	2.15413e-14	6.38435e-13	144	0	0	0	0	0	22	25	47	52	69	156	43	43	326	70	110	17	0
B1_Mur3:Tomm5	Tomm5	X			X					chr4	45106888	45107912	B1_Mur3	Alu	SINE	NA	NA	NA	-	internal	0	9.29803	10.1532	9.99083	9.70744	10.9936	69.087	1.58702e-13	3.68802e-12	145	0	0	0	0	0	23	20	119	14	51	204	43	102	156	131	73	65	2
MIR3:Bud31	Bud31				X					chr5	145140442	145141304	NA	NA	NA	MIR3	MIR	SINE	+	internal	2.86255	9.59716	10.5179	10.1191	9.17981	11.1118	64.4273	1.47323e-12	2.61979e-11	146	0	0	0	4	0	46	41	99	62	41	234	62	65	204	62	116	18	1
B4:C87436	C87436								X	chr6	86463335	86465800	B4	B4	SINE	NA	NA	NA	+	promoter_tss	1.44294	-3.94077	-3.30943	-2.35259	-4.30581	8.56164	54.6841	1.51603e-10	1.90202e-09	147	28	40	121	73	63	1	1	0	1	2	0	2	5	1	0	0	2	1
B1_Mur1:A530032D15Rik	A530032D15Rik									chr1	85088816	85089526	B1_Mur1	Alu	SINE	NA	NA	NA	-	terminator	4.78131	10.1452	9.98875	8.74265	6.71663	10.5818	65.373	9.37824e-13	1.69721e-11	148	0	0	1	9	7	66	72	131	80	50	86	28	10	90	9	23	3	0
RMER4A:Mdm4	Mdm4							X	X	chr1	133018884	133030534	NA	NA	NA	RMER4A	ERVK	LTR	-	promoter_tss	1.33044	2.42283	-0.600882	-0.790882	-5.32371	9.84744	28.9843	2.3353e-05	8.32e-05	149	32	40	86	70	99	51	52	104	1	19	2	1	24	1	1	0	0	2
LFSINE_Vert:Sec31a	Sec31a								X	chr5	100379001	100381159	NA	NA	NA	LFSINE_Vert	tRNA	SINE	-	internal	-2.5822	-8.53462	-1.06001	-1.43646	-1.61974	8.84665	15.0119	0.0103117	0.0161922	150	47	118	25	8	4	0	0	0	0	19	21	17	18	0	28	6	6	1
SRV_MM-int:Tmem184c	Tmem184c				X		X	X		chr8	77599769	77601414	SRV_MM-int	ERVK	LTR	SRV_MM-int	ERVK	LTR	-	internal	-1.30006	2.80476	3.06751	0.525762	1.35932	10.5865	34.0537	2.32312e-06	1.04643e-05	151	26	33	14	9	10	49	78	90	82	99	48	1	42	12	57	39	17	3
RMER15:Dynll2	Dynll2							X	X	chr11	87984010	88001831	NA	NA	NA	RMER15	ERVL	LTR	-	internal	1.36515	8.13497	8.75615	8.61869	9.9644	10.2347	69.5115	1.29504e-13	3.11571e-12	152	0	0	0	0	1	11	14	45	17	23	57	5	60	52	64	120	119	2
RLTR25B:Kif3a	Kif3a									chr11	53583366	53583814	NA	NA	NA	RLTR25B	ERVK	LTR	+	internal	-0.218233	-4.22783	-4.55052	-4.51477	-3.29889	8.67841	43.8179	2.52193e-08	1.99897e-07	153	96	66	42	94	61	2	2	0	1	2	0	2	2	0	9	2	1	0
B3:Mrpl15	Mrpl15			X	X					chr1	4774516	4777524	B3	B2	SINE	NA	NA	NA	-	terminator	0	7.70211	10.4441	9.99698	9.84236	10.962	82.9116	2.06219e-16	8.97274e-15	154	0	0	0	0	0	10	10	31	33	39	257	37	90	180	89	98	97	2
MTA_Mm:C2cd5	C2cd5							X	X	chr6	143013348	143015913	NA	NA	NA	MTA_Mm	ERVL-MaLR	LTR	-	promoter_tss	-0.851304	-5.1348	-1.85167	-5.40264	-6.35014	8.4905	37.9442	3.87197e-07	2.13428e-06	155	78	80	55	36	30	1	1	0	16	1	2	1	1	0	0	0	1	2
L3:B230118H07Rik	B230118H07Rik									chr2	101576151	101583520	NA	NA	NA	L3	CR1	LINE	-	internal	1.26753	-1.75862	-1.80623	3.73907	5.63421	9.54238	38.1375	3.54076e-07	1.96762e-06	156	0	8	11	0	17	1	0	0	0	0	1	34	27	4	95	126	79	0
RMER19B:Ppfibp2	Ppfibp2			X	X					chr7	107611291	107637213	RMER19B	ERVK	LTR	NA	NA	NA	+	promoter_tss	0.415778	-4.83376	-4.19934	-3.05903	-6.05358	8.65795	72.6794	2.8354e-14	8.16676e-13	157	67	59	75	85	76	1	1	0	1	2	0	3	5	1	0	0	1	2
Lx9:Cldn34b2	Cldn34b2								X	chrX	155125855	155135053	NA	NA	NA	Lx9	L1	LINE	-	internal	-0.760592	-5.09848	-5.00888	-5.36224	-8.41416	8.27591	66.7413	4.8764e-13	9.58869e-12	158	57	95	40	40	46	1	1	0	1	1	0	1	1	0	0	0	0	1
MTC:Acbd6	Acbd6									chr1	155567681	155572197	NA	NA	NA	MTC	ERVL-MaLR	LTR	+	terminator	1.36507	7.12783	9.31195	9.31242	9.83544	10.3726	73.5294	1.8854e-14	5.67006e-13	159	0	0	0	0	1	6	8	20	27	30	86	10	62	123	58	74	135	0
HAL1ME:Cstf3	Cstf3									chr2	104590702	104608870	NA	NA	NA	HAL1ME	L1	LINE	+	internal/terminator	-2.93817	5.81441	7.21086	4.29074	4.84886	10.1163	60.5114	9.52864e-12	1.49893e-10	160	3	0	0	0	0	16	29	61	67	74	104	0	23	22	27	28	16	0
MT2_Mm:Pla2g16	Pla2g16									chr19	7551407	7557931	MT2_Mm	ERVL	LTR	NA	NA	NA	+	promoter_tss	0	7.01652	9.85792	9.69452	9.82796	10.6296	68.4167	2.18757e-13	4.79758e-12	161	0	0	0	0	0	7	7	17	49	7	158	27	85	136	68	75	126	0
ORR1A4:Tnfsf13b	Tnfsf13b									chr8	10014261	10021372	ORR1A4	ERVL-MaLR	LTR	NA	NA	NA	+	internal/promoter_tss	-0.179892	2.30821	1.88025	2.15076	1.72081	10.9074	13.1967	0.0216037	0.0304058	162	6	78	21	46	39	74	64	75	87	16	39	60	75	106	61	64	68	0
L2c:Borcs8	Borcs8				X					chr8	70145134	70145810	NA	NA	NA	L2c	L2	LINE	+	internal	4.0523	3.81875	9.48519	7.93971	9.8036	10.0817	47.8822	3.75412e-09	3.63847e-08	163	0	0	1	1	8	1	1	1	30	59	67	44	0	19	92	81	101	1
MT2C_Mm:Pramel5	Pramel5									chr4	144274027	144280381	NA	NA	NA	MT2C_Mm	ERVL	LTR	-	promoter_tss	0	4.78395	5.34945	9.17952	9.77663	9.79345	95.5626	4.54628e-19	4.64857e-17	164	0	0	0	0	0	3	1	2	2	0	7	56	49	55	110	80	85	0
MT2B1:Trim13	Trim13								X	chr14	61563955	61599793	MT2B1	ERVL	LTR	NA	NA	NA	+	promoter_tss	0	10.0327	6.4644	6.04244	7.45514	9.64595	64.3264	1.54593e-12	2.6973e-11	165	0	0	0	0	0	49	59	149	14	2	1	2	2	16	23	23	11	1
MTB:Mkln1	Mkln1								X	chr6	31430791	31431139	MTB	ERVL-MaLR	LTR	NA	NA	NA	+	promoter_tss	-1.61548	-4.08098	-4.40067	-3.60694	-5.45533	8.08758	41.4351	7.66307e-08	5.25872e-07	166	53	92	22	31	13	2	2	0	1	2	0	3	3	1	0	1	1	1
B1F2:Lamtor2	Lamtor2									chr3	88550785	88552354	NA	NA	NA	B1F2	Alu	SINE	-	internal	-0.375423	-0.154993	-1.02751	0.453174	0.984479	10.1662	3.50294	0.622943	0.628475	167	100	45	60	65	30	17	21	30	3	25	5	2	117	6	33	42	107	0
RMER19B:Chst7	Chst7							X	X	chrX	20078292	20096964	RMER19B	ERVK	LTR	NA	NA	NA	+	promoter_tss	1.39611	-1.70504	-3.69097	-1.71676	-4.12962	8.48312	42.8677	3.93035e-08	2.92275e-07	168	20	40	84	68	70	4	3	2	0	2	0	3	7	1	0	0	2	2
L2c:Ift20	Ift20							X		chr11	78536576	78538509	NA	NA	NA	L2c	L2	LINE	+	internal	-0.505068	-0.33827	1.48551	-3.84479	0.697062	10.263	31.7033	6.80143e-06	2.80988e-05	169	72	72	47	56	39	16	26	15	87	75	18	2	2	2	41	23	86	1
L2:Glb1	Glb1									chr9	114459725	114464043	L2	L2	LINE	NA	NA	NA	+	internal/promoter	3.33164	7.21555	5.39699	4.7112	7.32001	10.2458	48.123	3.35232e-09	3.31184e-08	170	0	2	23	1	9	40	45	114	9	30	9	11	9	21	102	115	65	0
L2:Vma21	Vma21									chrX	71816940	71820067	NA	NA	NA	L2	L2	LINE	+	internal	-1.52053	-3.73428	-0.63407	0.975466	-0.275016	9.72186	27.3583	4.85703e-05	0.000159946	171	42	100	25	27	17	3	2	0	8	10	28	89	52	21	37	29	19	0
PB1D10:2010107G23Rik	2010107G23Rik									chr10	62110012	62110235	NA	NA	NA	PB1D10	Alu	SINE	-	internal	0.588877	-3.60058	-3.91542	-3.36821	-4.97358	8.53059	65.4535	9.02442e-13	1.64776e-11	172	35	68	73	76	69	2	2	0	1	2	0	2	2	2	1	0	1	0
ORR1A0:Eef1a1	Eef1a1			X	X					chr9	78480688	78487993	NA	NA	NA	ORR1A0	ERVL-MaLR	LTR	-	promoter_tss	0	7.96257	9.29329	9.74417	9.03118	10.3301	74.44	1.21752e-14	3.71618e-13	173	0	0	0	0	0	14	13	33	21	16	109	36	84	134	78	71	25	2
MTA_Mm:Tpgs2	Tpgs2							X	X	chr18	25158323	25165868	NA	NA	NA	MTA_Mm	ERVL-MaLR	LTR	-	promoter_tss	1.87858	2.57708	-3.13468	-3.48852	-2.37467	9.21653	81.1518	4.81757e-16	1.97039e-14	174	22	19	52	59	104	38	39	50	1	1	0	1	1	0	0	1	4	2
MT2C_Mm:Ufc1	Ufc1			X						chr1	171294827	171303916	NA	NA	NA	MT2C_Mm	ERVL	LTR	-	promoter_tss	0	7.41349	8.6239	8.89376	9.741	10.0886	89.982	6.77796e-18	4.47127e-16	175	0	0	0	0	0	9	9	23	7	31	51	27	39	73	110	132	42	1
L1M3f:Xpo5	Xpo5			X	X					chr17	46238419	46238889	NA	NA	NA	L1M3f	L1	LINE	+	internal	3.36829	6.23393	7.73109	7.79434	9.73917	9.64876	51.1037	8.23592e-10	9.15351e-09	176	0	0	0	0	6	5	6	6	26	6	11	8	9	51	64	85	108	2
MER90a:Myeov2	Myeov2									chr1	92639759	92641606	NA	NA	NA	MER90a	ERV1	LTR	-	promoter_tss	-0.169629	-1.11685	0.0525768	-5.22512	-4.60026	9.19578	29.21	2.10883e-05	7.59252e-05	177	40	99	67	37	69	11	12	9	6	54	7	1	1	0	4	0	0	0
PB1D10:Fbxo3	Fbxo3					X				chr2	104055026	104056000	NA	NA	NA	PB1D10	Alu	SINE	+	terminator	-0.652568	-8.28191	-4.8603	-5.21276	-1.89942	8.3938	34.8972	1.57739e-06	7.33127e-06	178	72	67	56	49	17	0	0	0	1	1	0	1	1	0	14	0	11	1
MIRb:Anapc15	Anapc15									chr7	101896450	101897732	NA	NA	NA	MIRb	MIR	SINE	+	internal	2.58791	7.1739	7.80158	6.34118	5.99427	10.646	86.9587	2.92303e-17	1.61557e-15	179	1	1	7	5	8	45	39	107	39	52	189	43	33	47	32	59	22	0
MT2_Mm:Gnpnat1	Gnpnat1			X						chr14	45384748	45404804	NA	NA	NA	MT2_Mm	ERVL	LTR	-	promoter_tss	2.05332	9.94432	9.33186	8.7249	9.43635	10.605	67.9999	2.67057e-13	5.63022e-12	180	0	0	0	2	0	59	44	136	45	8	91	46	22	49	71	123	35	1
Lx6:AI987944	AI987944		X					X	X	chr7	41388255	41393226	Lx6	L1	LINE	NA	NA	NA	-	internal	0.0316416	-3.67555	-4.85963	-5.21318	-6.23132	8.52776	69.3868	1.37476e-13	3.26906e-12	181	69	68	69	54	73	3	2	0	1	1	0	1	1	0	1	0	0	3
MT2_Mm:Grb2	Grb2									chr11	115699356	115715378	NA	NA	NA	MT2_Mm	ERVL	LTR	-	promoter_tss	0	5.84422	10.2604	9.66247	8.62876	10.4667	84.5256	9.46524e-17	4.60867e-15	182	0	0	0	0	0	4	4	5	59	27	195	20	61	168	46	51	30	0
MLT1A0:Whrn	Whrn									chr4	63460467	63461281	MLT1A0	ERVL-MaLR	LTR	NA	NA	NA	-	terminator	0.041555	-2.04894	-0.0618027	2.2859	3.42768	9.70214	30.2365	1.3249e-05	5.0361e-05	183	16	18	17	20	12	1	2	1	0	15	0	24	34	50	47	59	132	0
MTC:Mat2b	Mat2b						X	X	X	chr11	40687795	40691526	NA	NA	NA	MTC	ERVL-MaLR	LTR	-	promoter_tss	-0.27154	-4.9254	-4.83535	-5.18877	-8.23954	8.33452	70.0454	1.00272e-13	2.50067e-12	184	72	63	58	45	53	1	1	0	1	1	0	1	1	0	0	0	0	3
B1_Mur1:Atf7ip2	Atf7ip2									chr16	10212813	10213307	NA	NA	NA	B1_Mur1	Alu	SINE	+	terminator	0	10.0139	9.27878	7.46044	8.06157	10.226	59.8064	1.33276e-11	1.97499e-10	185	0	0	0	0	0	33	52	178	40	44	48	0	27	26	38	32	17	0
B3:Erh	Erh				X					chr12	80641044	80642788	NA	NA	NA	B3	B2	SINE	-	internal	-0.52801	1.74247	3.27558	2.22122	2.95221	10.6207	47.1966	5.18057e-09	4.85975e-08	186	25	21	9	17	19	26	24	29	34	92	93	70	20	38	99	95	63	1
B3A:Plcd4	Plcd4							X		chr1	74564812	74565031	B3A	B2	SINE	NA	NA	NA	+	internal	0	3.8253	5.69157	9.17084	4.76714	8.6948	31.3312	8.05724e-06	3.26278e-05	187	0	0	0	0	0	1	1	1	1	1	10	1	149	14	0	9	0	1
ORR1A4:Tnfsf13b	Tnfsf13b									chr8	10014261	10031309	ORR1A4	ERVL-MaLR	LTR	NA	NA	NA	+	internal/promoter_tss	-0.10033	3.15744	2.69962	2.71094	2.47476	10.5543	14.8615	0.0109707	0.0171146	188	2	38	24	18	10	57	65	62	87	11	18	16	64	99	45	75	41	0
PB1D7:2810474O19Rik	2810474O19Rik									chr6	149317708	149324731	PB1D7	Alu	SINE	NA	NA	NA	+	internal/promoter_tss	-0.0324755	0.832894	2.36785	-1.2172	-2.71334	9.7219	20.0336	0.0012317	0.00265699	189	47	24	22	46	30	17	34	11	52	107	5	2	1	18	7	1	0	0
RLTR20A4:Sdhc	Sdhc			X						chr1	171138755	171143557	RLTR20A4	ERVK	LTR	NA	NA	NA	-	internal	0.849385	-2.19018	-1.45394	-0.356732	1.68269	9.50971	10.907	0.053255	0.0659639	190	51	27	55	77	66	4	3	1	3	8	2	32	0	0	49	32	83	1
ORR1A2:Ap4s1	Ap4s1									chr12	51711032	51716941	ORR1A2	ERVL-MaLR	LTR	NA	NA	NA	+	promoter_tss	0	4.5117	8.87027	8.56085	9.60767	9.89612	47.5133	4.46455e-09	4.22685e-08	191	0	0	0	0	0	2	1	2	47	0	54	17	38	56	64	34	126	0
B1_Mus2:Slc35b2	Slc35b2									chr17	45565079	45565663	NA	NA	NA	B1_Mus2	Alu	SINE	+	terminator	-3.53039	-0.284657	4.58991	3.29845	3.44194	10.3073	58.2431	2.80244e-11	3.77039e-10	192	9	12	0	2	0	2	3	4	33	44	191	9	74	56	29	31	88	0
MURVY-LTR:Zscan5b	Zscan5b							X	X	chr7	6224759	6230071	MURVY-LTR	ERV1	LTR	NA	NA	NA	+	internal	0	8.25681	10.0148	9.83037	4.98316	10.3441	62.3128	4.03986e-12	6.60922e-11	193	0	0	0	0	0	16	17	41	78	29	119	39	7	238	7	1	2	2
MTA_Mm:Pakap	Pakap									chr4	57863967	57883023	MTA_Mm	ERVL-MaLR	LTR	NA	NA	NA	+	promoter_tss	-0.565967	-1.9468	-4.15988	-4.14024	-3.61278	8.38375	22.7982	0.000368907	0.000943017	194	83	43	46	47	25	6	6	4	2	1	0	2	2	0	0	0	6	0
MT2_Mm:Tpt1	Tpt1			X	X					chr14	75840879	75845616	MT2_Mm	ERVL	LTR	NA	NA	NA	+	promoter_tss	0	5.87214	8.47511	2.14496	9.56462	9.43551	88.6854	1.26887e-17	7.41385e-16	195	0	0	0	0	0	2	4	8	7	52	16	0	0	1	93	77	69	2
Lx3C:Sclt1	Sclt1									chr3	41657396	41658907	NA	NA	NA	Lx3C	L1	LINE	-	promoter_tss	-0.841829	-4.81588	-4.72637	-5.07972	-8.13187	8.03485	58.7464	2.2062e-11	3.0902e-10	196	52	73	38	39	20	1	1	0	1	1	0	1	1	0	0	0	0	0
L3:Bmp5	Bmp5							X	X	chr9	75839693	75873254	NA	NA	NA	L3	CR1	LINE	+	internal	0.377878	-1.00103	-5.35975	-4.81216	-2.59979	8.65822	28.3025	3.17636e-05	0.000109354	197	51	54	69	53	69	8	8	11	0	1	0	1	1	0	0	0	10	2
ERVB7_2B-LTR_MM:E030030I06Rik	E030030I06Rik							X	X	chr10	22144514	22148488	ERVB7_2B-LTR_MM	ERVK	LTR	NA	NA	NA	-	terminator	3.45983	7.40709	5.36285	6.05265	6.85665	10.2982	41.6684	6.87419e-08	4.76533e-07	198	2	0	13	7	17	41	45	144	22	7	18	13	39	55	38	22	116	2
B3A:Nme4	Nme4			X	X					chr17	26092152	26092506	NA	NA	NA	B3A	B2	SINE	-	internal	0	4.76684	7.63894	9.05571	7.49407	9.13451	22.5723	0.000407401	0.00102679	199	0	0	0	0	0	0	1	6	0	21	24	0	142	9	15	9	28	2
L3b:BC028528	BC028528				X					chr3	95888296	95888856	L3b	CR1	LINE	NA	NA	NA	-	internal/terminator	0	9.72836	8.45841	7.86263	8.09529	9.94038	44.9798	1.46463e-08	1.20773e-07	200	0	0	0	0	0	48	48	108	47	9	14	31	0	33	26	39	22	1
MMERVK10C-int:2610524H06Rik	2610524H06Rik									chr5	114822725	114823312	MMERVK10C-int	ERVK	LTR	NA	NA	NA	-	terminator	0.0132569	0.0850536	2.76744	1.19909	1.60484	10.1689	24.3422	0.000186583	0.000519133	201	31	29	27	28	30	10	13	9	78	38	79	9	53	27	25	26	67	0
B1_Mur3:Ticrr	Ticrr									chr7	79675408	79675509	NA	NA	NA	B1_Mur3	Alu	SINE	+	terminator	-1.68936	8.1256	6.42122	3.56929	3.87639	9.52575	65.5743	8.51845e-13	1.59819e-11	202	1	0	0	0	0	38	44	143	5	42	11	2	2	7	8	8	0	0
MIR3:Sorcs2	Sorcs2								X	chr5	36151549	36153822	MIR3	MIR	SINE	NA	NA	NA	-	terminator	-1.12847	-4.77048	-2.96748	-2.29858	-5.14744	8.13165	43.2928	3.22301e-08	2.45021e-07	203	53	67	22	30	25	1	1	0	2	4	1	4	7	4	0	0	2	1
PB1D7:2810474O19Rik	2810474O19Rik									chr6	149310377	149317634	NA	NA	NA	PB1D7	Alu	SINE	+	internal	-0.134855	0.492831	1.53444	-0.506701	-1.70384	10.0422	12.8972	0.0243613	0.0337298	204	76	43	55	50	46	21	44	18	82	59	11	1	28	27	9	7	9	0
MT2C_Mm:Siah1a	Siah1a									chr8	86725856	86729336	NA	NA	NA	MT2C_Mm	ERVL	LTR	-	promoter_tss	0	6.98094	9.75072	8.80067	7.93252	9.91625	49.3586	1.87455e-09	1.96587e-08	205	0	0	0	0	0	8	13	7	98	28	50	8	11	123	17	61	5	0
B4A:Plpp5	Plpp5									chr8	25723113	25724079	B4A	B4	SINE	NA	NA	NA	+	internal	-0.630046	-0.465933	1.55237	-0.576511	-0.959563	9.87832	13.8683	0.0164678	0.0240778	206	60	58	41	43	22	15	14	14	8	114	44	19	22	6	24	15	6	0
MT2C_Mm:Gm3286	Gm3286									chr5	95510875	95518667	MT2C_Mm	ERVL	LTR	NA	NA	NA	+	promoter_tss	0	6.79515	6.20615	9.95479	7.73215	9.66695	58.6741	2.28342e-11	3.15513e-10	207	0	0	0	0	0	6	8	12	6	6	3	15	25	278	50	11	10	0
MER110A:Creb3	Creb3				X					chr4	43565367	43565466	NA	NA	NA	MER110A	ERV1	LTR	+	internal	0	6.28436	8.73336	8.55712	9.45567	9.83923	43.1651	3.4211e-08	2.5816e-07	208	0	0	0	0	0	5	5	8	41	11	38	47	0	58	50	33	117	1
RSINE1:Cinp	Cinp									chr12	110875276	110876840	RSINE1	B4	SINE	NA	NA	NA	-	terminator	-0.810857	1.96851	2.76371	3.20405	3.46784	10.1964	65.4675	8.96422e-13	1.64776e-11	209	12	16	10	2	10	18	17	22	18	39	36	56	32	77	85	84	56	0
RMER13A:Cep57l1	Cep57l1									chr10	41745921	41752011	NA	NA	NA	RMER13A	ERVK	LTR	-	promoter_tss	-0.438544	-4.66245	-5.49407	-4.93651	-1.861	8.27305	19.8696	0.00132216	0.00281354	210	67	49	46	36	37	1	1	0	0	1	0	1	1	0	0	0	18	0
ID_B1:Flt3l	Flt3l									chr7	45131431	45132068	ID_B1	B4	SINE	NA	NA	NA	-	terminator	0	8.45369	9.64409	5.16321	8.63562	9.83441	52.5199	4.22007e-10	4.87878e-09	211	0	0	0	0	0	16	26	42	122	12	22	0	1	10	31	40	49	0
MIRc:Scmh1	Scmh1							X	X	chr4	120522649	120524997	NA	NA	NA	MIRc	MIR	SINE	+	internal	-1.14277	-3.4586	-1.44803	-2.62003	-2.42283	8.35059	9.7245	0.0834286	0.0968283	212	45	70	12	36	26	2	2	1	3	11	6	10	0	0	1	6	7	2
Plat_L3:Ttc17	Ttc17									chr2	94328485	94330517	Plat_L3	CR1	LINE	NA	NA	NA	-	terminator	-0.0146539	0.656975	1.48407	-4.00358	0.793509	10.1749	14.2921	0.0138569	0.020821	213	60	55	59	36	64	34	37	17	129	2	5	2	2	0	45	24	63	0
RLTR23:Tpm4	Tpm4			X	X	X				chr8	72146527	72147056	RLTR23	ERV1	LTR	NA	NA	NA	+	internal	-0.328688	2.47783	5.75804	6.15645	7.70848	9.35326	83.5041	1.54957e-16	7.20198e-15	214	0	1	0	0	1	1	1	2	3	15	21	8	32	27	126	53	43	3
X5B_LINE:Ascc2	Ascc2				X					chr11	4668648	4668861	X5B_LINE	CR1	LINE	NA	NA	NA	+	internal	0	2.50001	7.87361	9.1213	5.26783	8.97904	41.1526	8.73996e-08	5.86007e-07	215	0	0	0	0	0	1	0	0	4	0	53	46	80	25	4	5	3	1
RLTR20D:Ranbp17	Ranbp17									chr11	33470266	33474886	RLTR20D	ERVK	LTR	NA	NA	NA	-	terminator	-0.353119	0.734834	0.0756281	-1.21763	-1.01131	9.56839	15.6207	0.00801466	0.013133	216	60	53	50	37	36	31	34	30	20	24	11	8	15	7	12	14	13	0
B4A:Creg1	Creg1									chr1	165768445	165769812	B4A	B4	SINE	NA	NA	NA	+	promoter	2.50118	3.31687	7.81281	9.97418	9.19308	10.0445	41.351	7.96906e-08	5.45041e-07	217	0	0	0	0	3	0	2	0	25	12	8	5	24	298	53	38	82	0
MTA_Mm:Lrp1b	Lrp1b								X	chr2	40611508	40615095	NA	NA	NA	MTA_Mm	ERVL-MaLR	LTR	-	promoter_tss	-0.597501	-2.7438	-5.44299	-4.92384	-7.97078	8.06839	60.7318	8.57971e-12	1.36012e-10	218	61	51	39	34	30	4	3	1	1	0	0	1	1	0	0	0	0	1
B1_Mur4:Kpna7	Kpna7								X	chr5	145001224	145002345	NA	NA	NA	B1_Mur4	Alu	SINE	-	internal	0.0106217	-2.73436	-5.43375	-4.91455	-7.96185	8.30225	68.2431	2.37711e-13	5.11705e-12	219	43	68	53	50	54	4	3	1	1	0	0	1	1	0	0	0	0	1
L1_Mur3:Nr2e3	Nr2e3							X	X	chr9	59960660	59961623	NA	NA	NA	L1_Mur3	L1	LINE	-	internal/promoter_tss	1.75211	1.10478	-2.94612	-2.39355	-6.34528	8.42594	59.8155	1.32699e-11	1.97499e-10	220	20	16	70	50	50	15	12	12	1	1	0	1	3	0	0	0	0	2
BGLII:Nfu1	Nfu1									chr6	87009389	87009749	BGLII	ERVK	LTR	Lx7	L1	LINE	+	internal/promoter_tss	-0.958726	-1.88324	-7.95472	-1.15788	-3.90611	8.32724	14.0332	0.0154	0.022788	221	18	92	31	28	20	8	4	2	0	0	0	26	0	0	0	4	1	0
L1MB2:Rab3il1	Rab3il1			X	X	X				chr19	10035082	10038057	NA	NA	NA	L1MB2	L1	LINE	+	terminator	3.98643	5.1721	7.33748	9.16187	9.19407	9.64425	33.0226	3.72481e-06	1.6311e-05	222	0	0	7	1	1	3	2	3	11	2	23	116	2	23	19	31	111	3
B1_Mur3:Arhgdig	Arhgdig									chr17	26200370	26206684	NA	NA	NA	B1_Mur3	Alu	SINE	-	internal	0	6.51015	9.54919	6.36546	7.40789	9.32519	50.5628	1.06291e-09	1.16238e-08	223	0	0	0	0	0	4	9	8	67	57	28	1	1	24	5	29	18	0
B1F:Kpna7	Kpna7								X	chr5	145002408	145004931	B1F	Alu	SINE	NA	NA	NA	-	internal	0.0303494	-3.67335	-4.53373	-4.88727	-7.93555	8.25859	67.1292	4.05075e-13	8.20178e-12	224	43	66	46	50	61	2	2	0	1	1	0	1	1	0	0	0	0	1
B3A:Ago3	Ago3								X	chr4	126398380	126403164	B3A	B2	SINE	NA	NA	NA	-	terminator	-1.24428	-4.59958	-1.12828	-1.01006	-2.38709	8.47808	12.0175	0.0345488	0.0454648	225	52	57	23	20	21	1	1	0	3	7	15	11	20	1	0	13	2	1
MT2A:Ifitm1	Ifitm1									chr7	140967566	140968239	MT2A	ERVL	LTR	NA	NA	NA	+	internal/promoter_tss	0	3.59863	7.06401	8.87015	6.63246	8.77437	21.7387	0.000586986	0.00141555	226	0	0	0	0	0	0	0	3	0	10	21	0	129	3	11	11	9	0
MTC-int:Tmem232	Tmem232						X	X	X	chr17	65382654	65391788	NA	NA	NA	MTC-int	ERVL-MaLR	LTR	-	promoter_tss	1.25694	-2.22377	-2.76171	-6.78896	-1.48019	8.15888	20.0675	0.00121381	0.00262394	227	20	29	50	36	80	2	2	1	3	0	0	0	0	0	0	0	10	3
ID4_:Smim14	Smim14							X	X	chr5	65468501	65489075	NA	NA	NA	ID4_	ID	SINE	-	promoter_tss	-0.653275	-2.68244	-5.38543	-4.3444	-7.92484	8.02792	42.3008	5.11981e-08	3.64809e-07	228	32	76	45	33	17	4	3	1	1	0	0	1	2	0	0	0	0	2
ID_B1:Aamdc	Aamdc									chr7	97565300	97575587	NA	NA	NA	ID_B1	B4	SINE	-	internal/promoter_tss	-0.0514155	-4.23291	3.62828	2.56032	5.11765	9.25522	58.4028	2.59766e-11	3.51802e-10	229	6	2	0	10	1	0	0	0	11	19	20	6	10	16	65	50	82	0
PB1D7:2810474O19Rik	2810474O19Rik									chr6	149317708	149325404	PB1D7	Alu	SINE	NA	NA	NA	+	internal/promoter_tss	-0.655422	0.571571	-2.92708	-0.803425	-1.95174	9.09444	10.4238	0.064079	0.0765429	230	75	33	37	31	27	27	33	19	6	0	0	1	34	4	10	6	4	0
MER57E2:Fxr1	Fxr1							X		chr3	34046585	34046965	NA	NA	NA	MER57E2	ERV1	LTR	+	internal	0.65956	-0.0377651	2.30089	1.8685	-0.733958	10.084	22.4968	0.000421138	0.00105932	231	47	21	54	53	43	13	14	5	23	90	47	53	46	55	18	12	1	1
B3A:Hormad1	Hormad1									chr3	95585214	95585534	NA	NA	NA	B3A	B2	SINE	+	internal/terminator	0	8.8886	9.63744	6.91385	4.74961	9.68132	46.6483	6.70112e-09	6.04951e-08	232	0	0	0	0	0	22	24	71	31	71	71	11	0	24	8	1	0	0
MER110A:Creb3	Creb3				X					chr4	43565535	43566119	MER110A	ERV1	LTR	NA	NA	NA	+	internal	0	5.93369	8.61404	8.63405	9.32183	9.75708	42.4091	4.86773e-08	3.49281e-07	233	0	0	0	0	0	4	4	6	38	9	36	49	0	62	49	29	105	1
MTD:Chek2	Chek2									chr5	110832218	110841205	MTD	ERVL-MaLR	LTR	NA	NA	NA	+	internal	0	8.87329	9.93087	9.08531	7.68495	10.2879	68.5368	2.06537e-13	4.59095e-12	234	0	0	0	0	0	27	21	66	37	21	169	43	27	87	50	14	6	0
PB1D7:Bcas3	Bcas3			X	X					chr11	85354661	85354887	PB1D7	Alu	SINE	NA	NA	NA	+	internal/promoter	0	4.51277	8.42813	9.15273	6.20528	9.22692	39.0772	2.29138e-07	1.33121e-06	235	0	0	0	0	0	2	1	2	17	10	51	109	0	34	13	3	7	2
RMER4B:Pole4	Pole4							X		chr6	82619138	82651436	RMER4B	ERVK	LTR	NA	NA	NA	-	terminator	0	9.77867	7.23993	6.09087	8.10705	9.64419	43.0382	3.62983e-08	2.70913e-07	236	0	0	0	0	0	21	31	179	2	27	2	2	1	18	16	15	47	1
L3:Kdm7a	Kdm7a							X	X	chr6	39147801	39148941	L3	CR1	LINE	NA	NA	NA	-	internal	2.30983	2.87998	2.67155	1.49553	-1.20325	9.44722	18.684	0.00220075	0.00436098	237	11	12	67	53	41	20	26	46	20	25	26	2	32	8	0	0	6	2
ID_B1:Spata7	Spata7									chr12	98662087	98663164	ID_B1	B4	SINE	NA	NA	NA	+	internal	-0.436081	-1.28799	1.66183	1.48054	-0.534073	10.1207	23.6822	0.000249871	0.000673236	238	46	56	42	24	39	6	9	6	27	86	40	29	51	110	10	7	28	0
B1_Mur4:Sfi1	Sfi1						X	X	X	chr11	3185974	3186064	B1_Mur4	Alu	SINE	NA	NA	NA	-	terminator	0	9.67882	7.02511	5.06017	6.11909	9.28061	54.0979	2.0009e-10	2.40697e-09	239	0	0	0	0	0	35	29	144	1	18	9	3	3	3	17	7	0	3
MIRb:Abi3bp	Abi3bp									chr16	56541223	56556878	MIRb	MIR	SINE	NA	NA	NA	+	promoter	0.806267	-1.52654	-2.04397	-0.685145	-3.67281	8.43955	24.2517	0.000194218	0.000537451	240	38	26	33	70	56	4	4	3	1	6	0	6	10	9	0	0	3	0
MTD-int:Arhgap26	Arhgap26						X	X		chr18	38639972	38676717	MTD-int	ERVL-MaLR	LTR	L1M3	L1	LINE	+	internal/promoter_tss	-0.385968	-4.54677	-5.35345	-3.58282	-7.86958	8.02599	49.1592	2.05909e-09	2.129e-08	241	35	69	34	46	32	1	1	0	0	1	0	2	3	0	0	0	0	2
RLTR20A4:Sdhc	Sdhc			X						chr1	171136156	171138693	NA	NA	NA	RLTR20A4	ERVK	LTR	-	internal	0.540847	-2.81121	-1.90754	0.805159	1.5318	9.53207	10.8666	0.05409	0.0667959	242	49	29	53	49	57	3	2	0	7	1	1	70	0	2	45	36	69	1
RMER6A:Oip5	Oip5									chr2	119610364	119611751	RMER6A	ERVK	LTR	NA	NA	NA	-	terminator	-0.893234	5.90727	4.40126	6.25217	5.87688	9.91635	51.6003	6.51529e-10	7.32076e-09	243	1	2	0	2	0	25	18	71	5	12	19	92	8	55	35	54	50	0
RMER19B2:3110040N11Rik	3110040N11Rik									chr7	81780570	81783030	RMER19B2	ERVK	LTR	NA	NA	NA	-	terminator	1.36543	7.52363	6.44877	9.05884	8.89823	9.55404	49.5813	1.68792e-09	1.81674e-08	244	0	0	0	1	0	7	5	35	0	6	14	28	78	45	27	48	66	0
MLT1J:Tpra1	Tpra1							X		chr6	88902530	88905948	NA	NA	NA	MLT1J	ERVL-MaLR	LTR	+	internal	-4.72139	-7.85219	-7.85219	-7.85219	-7.85219	7.19201	34.8992	1.57595e-06	7.33127e-06	245	49	54	0	3	2	0	0	0	0	0	0	0	0	0	0	0	0	1
L2:Senp1	Senp1							X	X	chr15	98045398	98045858	NA	NA	NA	L2	L2	LINE	-	internal	0.195632	-0.270141	-0.698806	-2.27867	-0.00765965	9.20022	5.30787	0.379474	0.390158	246	73	25	50	47	60	14	16	10	10	15	2	10	0	1	10	12	39	2
B3A:Txlng	Txlng									chrX	162789094	162790611	B3A	B2	SINE	NA	NA	NA	-	terminator	-0.0433403	5.10889	4.52824	4.1526	3.84751	10.2549	25.1852	0.000128317	0.000374917	247	2	8	0	11	3	37	25	143	2	65	53	54	31	25	31	48	28	0
MTA_Mm:Abcb1b	Abcb1b									chr5	8840498	8845747	MTA_Mm	ERVL-MaLR	LTR	NA	NA	NA	+	promoter_tss	-1.49412	-4.5121	-4.42598	-3.32617	-5.72863	7.71659	30.5197	1.16515e-05	4.50421e-05	248	42	60	31	15	3	1	1	0	1	1	0	2	3	1	0	0	1	0
B4A:Plpp5	Plpp5									chr8	25722600	25723030	NA	NA	NA	B4A	B4	SINE	+	internal/terminator	-0.304685	-0.649273	0.345604	-0.525609	-0.709081	9.32253	1.80847	0.874961	0.875389	249	43	59	56	31	27	13	11	8	9	39	13	33	2	4	21	10	13	0
MIR3:Ctnnb1	Ctnnb1									chr9	120951787	120952858	NA	NA	NA	MIR3	MIR	SINE	+	internal	-1.97586	-2.82192	-2.41981	0.168433	-1.85329	8.57192	19.6264	0.00146834	0.00308291	250	55	46	6	18	12	3	2	2	3	1	5	26	31	11	6	1	11	0
RMER6D:Zwint	Zwint									chr10	72657388	72673965	NA	NA	NA	RMER6D	ERVK	LTR	+	terminator	6.09591	7.97747	8.81169	8.74116	9.25866	10.0251	24.8758	0.000147244	0.000423508	251	0	0	17	16	9	26	14	15	51	0	44	80	14	12	79	86	36	0
MTA_Mm:Gna14	Gna14							X	X	chr19	16501670	16533712	MTA_Mm	ERVL-MaLR	LTR	NA	NA	NA	+	promoter_tss	0.365564	-1.45216	-1.43387	-3.95095	-7.54144	8.39304	25.1781	0.000128722	0.000374982	252	42	41	42	41	68	5	6	4	0	14	0	1	2	0	0	0	0	2
B3A:Cinp	Cinp									chr12	110879039	110879684	B3A	B2	SINE	NA	NA	NA	-	terminator	1.36728	8.02263	8.95796	9.18395	8.83398	10.0127	66.1996	6.31782e-13	1.21886e-11	253	0	0	0	1	0	13	11	40	17	10	89	29	58	83	60	35	47	0
MT2_Mm:Fundc1	Fundc1							X	X	chrX	17571459	17584551	NA	NA	NA	MT2_Mm	ERVL	LTR	-	promoter_tss	0	9.54533	7.39422	2.14423	7.18315	9.29738	81.1593	4.80023e-16	1.97039e-14	254	0	0	0	0	0	28	37	123	16	12	6	0	0	1	6	21	17	2
ORR1A2:Ubtfl1	Ubtfl1						X	X		chr9	18404534	18404652	ORR1A2	ERVL-MaLR	LTR	MT2C_Mm	ERVL	LTR	+	internal/promoter_tss	0	9.48851	9.17394	7.70752	8.06706	9.99142	70.4236	8.36493e-14	2.16233e-12	255	0	0	0	0	0	29	41	108	45	37	39	4	10	51	30	36	20	2
L4_A_Mam:Nop58	Nop58			X	X					chr1	59692728	59695977	L4_A_Mam	RTE-X	LINE	NA	NA	NA	+	internal	0	7.81004	9.44181	7.88155	8.22636	9.71996	48.5178	2.78437e-09	2.81883e-08	256	0	0	0	0	0	12	16	25	50	54	41	16	0	55	34	43	20	2
RSINE1:Plekhg1	Plekhg1							X	X	chr10	3903657	3904003	NA	NA	NA	RSINE1	B4	SINE	+	terminator	1.50801	-2.0987	-6.38331	-2.80075	-6.38331	7.87902	46.1763	8.36152e-09	7.27643e-08	257	22	15	43	63	43	2	2	0	0	0	0	1	2	0	0	0	0	2
X6A_LINE:Ttc32	Ttc32									chr12	9035088	9035761	NA	NA	NA	X6A_LINE	CR1	LINE	+	terminator	-0.846654	2.30937	3.19627	0.00555879	1.24394	9.57714	26.159	8.3116e-05	0.000254378	258	19	12	6	11	7	16	26	41	40	73	18	3	2	16	10	4	32	0
MTC-int:Itpr2	Itpr2									chr6	146144269	146146554	NA	NA	NA	MTC-int	ERVL-MaLR	LTR	-	promoter_tss	-0.0991555	-4.4414	-4.34926	-4.70295	-7.74839	8.03622	68.3999	2.20525e-13	4.79758e-12	259	56	40	36	43	47	1	1	0	1	1	0	1	1	0	0	0	0	0
MT2B:Atp13a3	Atp13a3									chr16	30387652	30402748	NA	NA	NA	MT2B	ERVL	LTR	-	internal/promoter_tss	0	9.42474	8.15666	6.03844	8.6062	9.69582	46.5778	6.9264e-09	6.2125e-08	260	0	0	0	0	0	33	39	96	47	2	6	2	2	16	49	28	43	0
LFSINE_Vert:Erp29	Erp29									chr5	121445572	121447140	NA	NA	NA	LFSINE_Vert	tRNA	SINE	-	internal	0.731993	1.97526	0.271133	1.82588	2.09643	10.2087	16.3713	0.00586026	0.00996195	261	37	23	55	44	40	40	42	37	13	16	4	55	19	58	62	50	65	0
L2b:Nme6	Nme6									chr9	109833295	109839607	L2b	L2	LINE	NA	NA	NA	+	internal/promoter	0	0	9.08502	8.13083	9.19639	9.68184	47.6259	4.23464e-09	4.02783e-08	262	0	0	0	0	0	0	0	0	23	45	50	40	0	36	41	64	72	0
MT2C_Mm:Clybl	Clybl									chr14	122168405	122311243	MT2C_Mm	ERVL	LTR	NA	NA	NA	+	promoter_tss	0	8.88517	9.43294	7.06441	8.1732	9.83684	69.6139	1.23303e-13	3.00184e-12	263	0	0	0	0	0	20	32	63	66	34	43	1	12	28	46	33	16	0
B1F2:Sycp1	Sycp1				X					chr3	102912816	102913420	B1F2	Alu	SINE	NA	NA	NA	-	terminator	0	9.54484	9.54275	7.52653	5.22449	9.94416	66.8293	4.67538e-13	9.28267e-12	264	0	0	0	0	0	29	29	132	35	21	114	4	22	29	9	1	2	1
MTB:Zfp277	Zfp277									chr12	40335375	40351713	NA	NA	NA	MTB	ERVL-MaLR	LTR	-	promoter_tss	-0.127526	-3.41115	-1.8441	-7.72244	-5.57056	8.15367	24.4434	0.0001784	0.000500451	265	39	55	38	38	45	2	2	0	11	0	0	0	0	0	0	0	1	0
MTB_Mm:Yaf2	Yaf2							X	X	chr15	93286562	93325020	NA	NA	NA	MTB_Mm	ERVL-MaLR	LTR	-	promoter_tss	-1.26111	-7.7053	-5.18463	-4.63558	-7.7053	7.55902	39.6078	1.79157e-07	1.07442e-06	266	45	48	29	5	19	0	0	0	0	1	0	1	1	0	0	0	0	2
RLTRETN_Mm:Lcmt1	Lcmt1									chr7	123378255	123396044	NA	NA	NA	RLTRETN_Mm	ERVK	LTR	+	terminator	-0.322524	-7.70391	-4.26954	-4.62129	-1.14434	8.16002	22.4229	0.000435021	0.00108888	267	50	43	26	33	46	0	0	0	1	1	0	1	1	0	0	1	23	0
Lx3B:Pacrgl	Pacrgl									chr5	48328046	48374179	Lx3B	L1	LINE	NA	NA	NA	+	promoter_tss	-0.323721	-4.37878	-4.28785	-2.76845	-5.5982	7.98357	45.6572	1.06647e-08	9.12525e-08	268	44	48	43	40	19	1	1	0	1	1	0	3	4	1	0	0	1	0
X3_LINE:Exosc8	Exosc8									chr3	54734332	54735007	X3_LINE	RTE-BovB	LINE	NA	NA	NA	-	internal	-1.57054	-0.902467	3.27655	2.86187	1.49154	9.76172	43.9841	2.33346e-08	1.87135e-07	269	14	17	8	2	4	4	3	1	64	7	76	54	32	55	26	29	10	0
MTA_Mm:Bmp5	Bmp5							X	X	chr9	75824797	75828017	MTA_Mm	ERVL-MaLR	LTR	NA	NA	NA	+	promoter_tss	0.50881	-3.01323	-3.33298	-2.21145	-5.18456	8.10034	40.1195	1.41278e-07	8.83082e-07	270	28	41	47	46	45	2	2	0	1	2	0	2	6	1	0	0	1	2
MTB:Phf20	Phf20							X	X	chr2	156234356	156251775	MTB	ERVL-MaLR	LTR	NA	NA	NA	+	promoter_tss	-0.312647	-4.33789	-4.24904	-3.69857	-7.65613	7.90551	48.0208	3.51737e-09	3.45818e-08	271	51	39	37	33	31	1	1	0	1	1	0	1	3	0	0	0	0	2
Lx5b:C87414	C87414									chr5	93638933	93665399	NA	NA	NA	Lx5b	L1	LINE	-	internal/promoter_tss	0.360996	-4.11971	-4.02983	-4.38322	-7.43443	8.01541	58.7581	2.19397e-11	3.0902e-10	272	37	40	55	36	47	1	1	0	1	1	0	1	1	0	0	0	0	0
PB1D9:Mrpl30	Mrpl30									chr1	37890584	37892942	NA	NA	NA	PB1D9	Alu	SINE	+	internal	1.55928	2.77486	3.36741	5.33706	6.127	9.23799	40.309	1.29371e-07	8.21626e-07	273	0	3	1	0	13	4	3	5	6	3	8	15	33	43	56	39	68	0
B1_Mus2:Timm9	Timm9									chr12	71132086	71133899	NA	NA	NA	B1_Mus2	Alu	SINE	-	internal	0	7.29266	9.29621	5.62164	6.93506	9.1471	56.4443	6.5825e-11	8.51975e-10	274	0	0	0	0	0	6	11	21	44	51	36	1	1	13	3	16	17	0
B1_Mur1:Nup214	Nup214							X	X	chr2	31998050	31998202	NA	NA	NA	B1_Mur1	Alu	SINE	+	terminator	-0.162385	1.98387	-1.79678	0.178166	0.876701	9.63155	11.5838	0.0409582	0.0525467	275	46	23	30	24	32	35	37	74	4	3	2	2	44	3	3	21	54	2
MTD:Rnf24	Rnf24									chr2	131313312	131328873	NA	NA	NA	MTD	ERVL-MaLR	LTR	-	promoter_tss	0.570486	-2.89874	-3.76813	-4.9957	-7.18313	7.95186	43.6546	2.72188e-08	2.1151e-07	276	53	12	43	52	40	2	2	0	1	1	0	0	1	0	0	0	0	0
Lx9:Cldn34b2	Cldn34b2								X	chrX	155135184	155147699	Lx9	L1	LINE	MTB	ERVL-MaLR	LTR	-	internal/promoter_tss	-0.85781	-4.31738	-5.11525	-4.57995	-7.62838	7.65746	54.2103	1.89726e-10	2.30947e-09	277	34	54	22	21	25	1	1	0	0	1	0	1	1	0	0	0	0	1
B4:Shcbp1l	Shcbp1l				X					chr1	153449023	153452212	B4	B4	SINE	NA	NA	NA	+	internal/promoter_tss	0.201938	-0.335247	-3.5975	-3.95576	-4.2202	8.43246	34.4857	1.90554e-06	8.73728e-06	278	28	56	54	44	37	15	12	5	2	1	0	2	1	0	0	3	0	1
MT2B1:Tcstv3	Tcstv3						X	X		chr13	120317016	120317538	MT2B1	ERVL	LTR	NA	NA	NA	+	internal/promoter_tss	0.925424	1.8449	-1.16948	2.07413	1.62465	9.68304	6.54348	0.256865	0.27035	279	25	20	42	43	35	39	13	29	2	1	7	99	1	0	51	20	28	2
MT2_Mm:Bola1	Bola1									chr3	96197737	96200322	NA	NA	NA	MT2_Mm	ERVL	LTR	-	internal/promoter_tss	0	9.21562	8.87024	8.68536	8.27033	10.0013	37.1379	5.61994e-07	2.96206e-06	280	0	0	0	0	0	32	39	71	70	10	11	29	0	95	29	29	36	0
L1MD2:Rab2a	Rab2a									chr4	8582493	8589394	NA	NA	NA	L1MD2	L1	LINE	+	terminator	-1.37553	-2.11556	3.16324	0.32696	2.2646	9.21348	15.5088	0.00839589	0.0136159	281	12	15	7	4	3	1	1	1	0	101	14	18	0	0	20	55	20	0
LTR48:Cds1	Cds1									chr5	101809973	101812494	LTR48	ERV1	LTR	NA	NA	NA	+	internal	2.70703	2.13382	5.46892	5.48544	6.07202	9.56154	17.9198	0.00304859	0.00577071	282	2	1	9	11	11	2	5	0	50	14	1	16	0	91	56	46	57	0
LFSINE_Vert:Acadvl	Acadvl	X			X					chr11	70011770	70012185	LFSINE_Vert	tRNA	SINE	NA	NA	NA	-	internal	0	4.36283	6.91883	6.49477	9.02097	8.84399	22.683	0.00038806	0.000984593	283	0	0	0	0	0	1	0	4	0	9	19	21	0	0	46	51	61	2
ORR1E:Fam155a	Fam155a							X	X	chr8	9233105	9322886	NA	NA	NA	ORR1E	ERVL-MaLR	LTR	-	promoter_tss	-1.21744	-4.26859	-5.06413	-4.53037	-5.54511	7.53475	47.8833	3.75225e-09	3.63847e-08	284	40	45	16	18	17	1	1	0	0	1	0	1	1	0	1	0	0	2
IAPLTR2a2_Mm:Iqca	Iqca							X	X	chr1	90089550	90089931	NA	NA	NA	IAPLTR2a2_Mm	ERVK	LTR	-	promoter_tss	0.0519032	1.00252	-4.16637	-4.52036	-7.55993	8.79848	86.3236	3.97273e-17	2.08314e-15	285	38	46	32	50	41	30	24	32	1	1	0	1	1	0	0	0	0	2
MMERVK10C-int:Olfr976	Olfr976		X						X	chr9	39956946	39960825	NA	NA	NA	MMERVK10C-int	ERVK	LTR	-	promoter_tss	7.65309	0	0	0	0	7.39369	34.6477	1.76892e-06	8.16578e-06	286	0	0	22	33	73	0	0	0	0	0	0	0	0	0	0	0	0	2
MT2_Mm:Arsk	Arsk						X	X	X	chr13	76075051	76077288	NA	NA	NA	MT2_Mm	ERVL	LTR	-	promoter_tss	0.379207	7.6276	3.38819	2.55003	-1.69002	8.73387	94.8622	6.38346e-19	6.21627e-17	287	1	0	1	0	1	29	25	106	3	1	3	2	1	2	0	0	0	3
MTA_Mm:Atg5	Atg5							X	X	chr10	44337331	44346956	MTA_Mm	ERVL-MaLR	LTR	NA	NA	NA	+	promoter_tss	0.366045	1.35597	1.4536	0.12634	-1.34687	9.64748	6.82419	0.234047	0.247993	288	36	34	39	36	52	19	37	38	50	26	9	1	22	29	0	1	15	2
L2b:Nme6	Nme6									chr9	109833295	109835317	L2b	L2	LINE	NA	NA	NA	+	internal/promoter	1.6515	3.83198	3.36619	4.5714	4.91861	9.63969	15.0966	0.00995741	0.0157121	289	5	2	22	3	6	16	21	16	14	18	2	49	0	61	57	48	51	0
B1_Mur4:Ccnt1	Ccnt1									chr15	98560092	98560196	B1_Mur4	Alu	SINE	NA	NA	NA	-	terminator	0	8.40796	8.47137	7.9826	8.98134	9.72116	60.2757	1.06601e-11	1.62685e-10	290	0	0	0	0	0	16	12	57	7	18	57	37	8	22	51	58	49	0
RSINE1:Med14	Med14									chrX	12709240	12713582	RSINE1	B4	SINE	NA	NA	NA	-	terminator	4.7557	7.42823	6.65493	5.63534	6.03892	9.61322	67.4964	3.39811e-13	6.94913e-12	291	1	0	20	19	15	33	37	61	33	11	24	8	18	20	22	22	22	0
MERVL-int:Parp8	Parp8			X	X					chr13	117025277	117039347	NA	NA	NA	MERVL-int	ERVL	LTR	-	internal	0	5.24705	9.14607	9.08596	8.75323	9.83603	35.0739	1.45444e-06	6.85328e-06	292	0	0	0	0	0	3	4	1	92	6	11	38	0	126	66	44	30	2
MT2B2:Aatf	Aatf			X	X					chr11	84510417	84511482	NA	NA	NA	MT2B2	ERVL	LTR	-	internal	-4.06408	3.84468	5.25863	4.42809	4.59179	9.89784	53.8409	2.25974e-10	2.68672e-09	293	0	7	0	0	0	13	16	28	38	37	64	5	43	61	47	65	21	2
PB1D7:Rpap2	Rpap2							X	X	chr5	107633131	107641953	NA	NA	NA	PB1D7	Alu	SINE	+	terminator	1.48175	-0.460078	2.593	-3.09481	-4.03006	8.84122	25.4427	0.00011442	0.000338134	294	23	9	41	44	41	3	4	5	0	85	5	1	1	0	0	0	1	2
MTA_Mm:Memo1	Memo1									chr17	74225574	74229663	NA	NA	NA	MTA_Mm	ERVL-MaLR	LTR	-	promoter_tss	1.61767	0.774903	-0.15219	-6.0393	-4.01484	8.14334	26.934	5.87557e-05	0.000188331	295	14	15	43	38	45	8	10	7	0	12	0	0	0	0	0	1	0	0
MLT1G3:Sbf2	Sbf2							X	X	chr7	110310289	110312073	MLT1G3	ERVL-MaLR	LTR	NA	NA	NA	-	internal	-1.33319	-3.01685	-0.222381	-1.13068	-3.33149	8.2871	7.51264	0.185219	0.199355	296	25	57	29	7	8	2	1	2	0	29	4	14	6	1	6	0	0	2
MTE2a:Luzp1	Luzp1							X	X	chr4	136539216	136540355	MTE2a	ERVL-MaLR	LTR	NA	NA	NA	+	internal	-0.19038	-3.44612	1.61077	-4.31733	-1.2987	8.98707	13.6035	0.0183346	0.0264879	297	55	18	40	36	12	1	2	0	0	102	0	1	0	1	18	1	3	2
B3:Ociad1	Ociad1									chr5	73294010	73294284	B3	B2	SINE	NA	NA	NA	+	internal	3.76372	3.24507	5.13214	5.45359	4.44484	9.50617	39.447	1.93027e-07	1.14155e-06	298	1	3	30	29	25	8	7	6	27	8	41	23	59	42	20	20	26	0
B3A:Hormad1	Hormad1									chr3	95585589	95587380	B3A	B2	SINE	NA	NA	NA	+	internal	0	9.02231	9.46702	5.60866	4.75724	9.5682	49.5208	1.7367e-09	1.85946e-08	299	0	0	0	0	0	27	20	82	16	39	108	10	0	2	6	3	0	0
PB1D7:Polr2k	Polr2k				X					chr15	36174213	36174986	PB1D7	Alu	SINE	NA	NA	NA	+	promoter	4.1104	7.26015	8.4263	8.69074	8.55616	9.57333	25.4099	0.000116101	0.00034162	300	0	0	6	2	2	11	7	18	12	17	49	91	0	8	27	42	45	1
MT2_Mm:Dym	Dym								X	chr18	75158980	75229989	MT2_Mm	ERVL	LTR	NA	NA	NA	+	promoter_tss	0	3.81991	7.91125	6.81844	8.93894	9.01717	45.4169	1.19359e-08	1.01282e-07	301	0	0	0	0	0	1	1	1	23	1	28	1	26	5	64	43	47	1
MT2_Mm:Abhd6	Abhd6							X	X	chr14	8026408	8028236	MT2_Mm	ERVL	LTR	NA	NA	NA	+	promoter_tss	0	8.81236	9.41762	6.68658	6.17281	9.57139	54.5761	1.59562e-10	1.98966e-09	302	0	0	0	0	0	27	26	54	43	20	89	5	9	16	22	3	0	2
MTA_Mm:Dpys	Dpys									chr15	39784714	39792426	NA	NA	NA	MTA_Mm	ERVL-MaLR	LTR	-	promoter_tss	-1.53235	-7.51079	-4.99475	-4.4538	-7.51079	7.36629	46.1904	8.30634e-09	7.27643e-08	303	27	54	13	8	18	0	0	0	0	1	0	1	1	0	0	0	0	0
MER34A:Gm40447	Gm40447									chr12	75746041	75747869	MER34A	ERV1	LTR	NA	NA	NA	-	terminator	7.62416	0	3.41371	3.90709	7.3094	8.03938	48.567	2.72068e-09	2.76806e-08	304	0	0	35	27	62	0	0	0	1	1	0	1	1	2	16	5	25	0
RLTR14-int:Gprasp1	Gprasp1									chrX	135752017	135761728	RLTR14-int	ERV1	LTR	Lx8b	L1	LINE	+	internal/terminator	4.693	2.44135	2.56226	4.60607	8.95867	8.46899	41.016	9.3134e-08	6.18373e-07	305	0	0	12	0	3	0	1	0	1	0	0	1	1	5	18	36	86	0
PB1D11:Snapc3	Snapc3									chr4	83461111	83465964	PB1D11	Alu	SINE	B3A	B2	SINE	+	internal	0	6.75697	8.98626	5.11499	5.01264	8.6989	20.7877	0.000888391	0.00201638	306	0	0	0	0	0	2	5	21	4	92	9	0	0	11	0	0	8	0
MTC-int:E330021D16Rik	E330021D16Rik							X	X	chr6	136412971	136415326	NA	NA	NA	MTC-int	ERVL-MaLR	LTR	-	promoter_tss	-1.36375	-2.72527	-4.10328	-2.98443	-4.55503	7.61172	30.0012	1.47403e-05	5.51075e-05	308	38	42	17	11	15	2	2	2	0	2	0	2	3	1	0	0	2	2
L3:Camta1	Camta1							X		chr4	151074062	151075091	L3	CR1	LINE	NA	NA	NA	-	internal	-0.249278	-4.1806	-4.08853	-4.44222	-7.48785	7.7895	58.5121	2.46619e-11	3.3848e-10	309	43	37	33	34	27	1	1	0	1	1	0	1	1	0	0	0	0	1
ORR1A4-int:2610044O15Rik8	2610044O15Rik8				X					chr8	129217749	129220101	ORR1A4-int	ERVL-MaLR	LTR	NA	NA	NA	-	terminator	0	9.16429	0	7.03827	7.28374	9.01725	37.8243	4.09257e-07	2.22588e-06	310	0	0	0	0	0	41	19	78	0	0	0	30	0	1	19	27	6	1
B1F:Echdc2	Echdc2			X	X					chr4	108175417	108177072	B1F	Alu	SINE	NA	NA	NA	+	internal	0	0	3.24364	7.40363	8.91585	8.6861	33.5996	2.86047e-06	1.26786e-05	311	0	0	0	0	0	0	0	0	0	0	2	0	44	4	43	44	59	2
ID_B1:Flt3l	Flt3l									chr7	45131566	45131666	ID_B1	B4	SINE	B1F	Alu	SINE	-	internal/terminator	0	5.64618	9.27635	6.1338	8.05661	9.21935	39.2041	2.1605e-07	1.26597e-06	312	0	0	0	0	0	2	3	7	34	34	68	7	0	13	1	18	53	0
PB1D10:2010107G23Rik	2010107G23Rik									chr10	62110314	62134488	PB1D10	Alu	SINE	NA	NA	NA	-	internal	0.192403	-4.97712	-4.00175	-2.91077	-5.31544	7.95053	60.3573	1.02541e-11	1.59518e-10	313	34	41	43	42	35	0	1	0	1	1	0	2	2	2	0	0	1	0
L1MB2:Nrf1	Nrf1									chr6	30088988	30089911	L1MB2	L1	LINE	NA	NA	NA	+	internal/promoter	0.487827	0.0318395	2.94152	1.57976	0.46283	9.45612	32.3304	5.1099e-06	2.168e-05	314	25	10	22	14	33	6	7	5	42	28	61	21	18	27	15	4	14	0
B1F1:Ppig	Ppig									chr2	69731580	69731745	B1F1	Alu	SINE	NA	NA	NA	+	internal	-0.390539	1.52005	1.32063	0.900485	-0.649144	9.76681	18.3743	0.0025121	0.00489727	315	47	25	32	30	14	38	39	25	29	32	23	31	22	30	12	19	3	0
MT2B1:AF067063	AF067063							X	X	chr13	119828688	119830059	NA	NA	NA	MT2B1	ERVL	LTR	-	internal/promoter_tss	0	9.22193	8.70834	8.92963	7.52187	9.92516	51.3614	7.29282e-10	8.14963e-09	316	0	0	0	0	0	23	26	102	17	21	56	16	31	102	1	35	20	2
B3A:Zar1l	Zar1l						X	X		chr5	150511872	150512868	B3A	B2	SINE	NA	NA	NA	-	internal	3.71949	3.33205	-3.84234	-0.787474	-0.127653	7.97168	44.3438	1.97231e-08	1.60055e-07	317	5	1	40	30	48	12	11	9	0	0	0	1	1	0	0	4	0	2
MLT2B4:Me1	Me1							X		chr9	86679952	86686957	NA	NA	NA	MLT2B4	ERVL	LTR	-	promoter_tss	0.417501	-3.83794	-4.63367	-4.09978	-7.1461	7.81874	62.2646	4.13372e-12	6.7091e-11	318	32	31	41	36	41	1	1	0	0	1	0	1	1	0	0	0	0	1
B3A:Plcd4	Plcd4							X		chr1	74564512	74564755	NA	NA	NA	B3A	B2	SINE	+	internal	0	3.82419	7.74069	8.49013	5.90976	8.64869	29.0197	2.29825e-05	8.21665e-05	319	0	0	0	0	0	1	1	1	8	7	34	0	84	20	0	15	4	1
RLTR14-int:Gprasp1	Gprasp1									chrX	135748782	135751944	NA	NA	NA	RLTR14-int	ERV1	LTR	+	internal	0.704168	-2.44365	0.99008	3.25251	6.42399	8.42719	38.1206	3.56854e-07	1.97769e-06	320	2	0	1	0	4	0	0	0	1	1	0	1	1	14	14	21	92	0
MT2B:Gpbp1	Gpbp1							X	X	chr13	111466970	111498329	NA	NA	NA	MT2B	ERVL	LTR	-	promoter_tss	0	9.19508	8.14051	5.32302	0	9.08063	76.7508	4.00934e-15	1.36652e-13	321	0	0	0	0	0	22	27	99	19	18	23	1	1	10	0	0	0	2
ID4:Nrf1	Nrf1									chr6	30090146	30090268	NA	NA	NA	ID4	ID	SINE	+	internal	0.0751976	2.39373	4.71345	2.52562	2.84128	9.30098	29.1717	2.14565e-05	7.69801e-05	322	9	1	2	0	13	6	8	15	25	39	71	5	15	19	15	10	24	0
RLTR10-int:Gm6943	Gm6943									chr12	19561556	19562995	RLTR10-int	ERVK	LTR	NA	NA	NA	+	internal/promoter_tss	7.52392	3.37779	0	3.09918	1.9904	7.3986	22.3891	0.000441524	0.00109978	323	0	0	24	92	0	1	1	0	0	0	0	1	1	0	1	0	0	0
B3A:Nme4	Nme4			X	X					chr17	26092557	26093616	B3A	B2	SINE	NA	NA	NA	-	internal	0	4.76759	7.74102	8.38586	7.82681	8.9262	21.2668	0.000721213	0.00168558	324	0	0	0	0	0	0	1	6	0	24	24	0	88	7	15	10	39	2
B1F:Dtnbp1	Dtnbp1									chr13	44970178	44974645	NA	NA	NA	B1F	Alu	SINE	-	promoter_tss	0	7.73721	9.0232	8.01699	6.66147	9.32959	32.7274	4.26285e-06	1.83527e-05	325	0	0	0	0	0	10	22	17	79	10	12	0	19	63	5	23	5	0
L2:Mau2	Mau2									chr8	70019874	70020419	L2	L2	LINE	NA	NA	NA	-	internal	2.20426	5.03599	3.44643	5.26184	5.38877	9.55776	18.0786	0.00284951	0.00545623	326	1	3	1	12	16	33	17	22	15	0	7	75	8	11	47	63	26	0
ID_B1:Aamdc	Aamdc									chr7	97575691	97579365	ID_B1	B4	SINE	NA	NA	NA	-	internal	1.36635	4.48919	7.91588	6.54716	8.83726	8.94914	58.7166	2.23769e-11	3.11297e-10	327	0	0	0	1	0	1	2	2	9	28	14	0	13	15	48	47	47	0
B1_Mus1:Rusc1	Rusc1									chr3	89086895	89087248	NA	NA	NA	B1_Mus1	Alu	SINE	-	promoter_tss	0	3.26658	5.53219	8.51478	7.17747	8.47939	42.3897	4.91209e-08	3.51232e-07	328	0	0	0	0	0	1	0	1	0	0	11	39	44	14	13	18	14	0
MERV1_LTR:Mtf2	Mtf2				X					chr5	108060863	108080824	MERV1_LTR	ERV1	LTR	NA	NA	NA	+	promoter_tss	0	8.98965	9.28014	8.71091	8.5491	10.1052	79.5289	1.05296e-15	3.9876e-14	329	0	0	0	0	0	27	28	68	43	17	77	17	29	80	35	68	20	1
MTA_Mm:Pakap	Pakap									chr4	57865352	57892868	MTA_Mm	ERVL-MaLR	LTR	NA	NA	NA	+	promoter_tss	0.123166	-4.07142	-3.97914	-2.87334	-5.29125	7.92469	50.2313	1.2427e-09	1.35176e-08	330	34	40	49	30	33	1	1	0	1	1	0	2	3	1	0	0	1	0
MTA_Mm-int:Pakap	Pakap									chr4	57864787	57892868	MTA_Mm-int	ERVL-MaLR	LTR	NA	NA	NA	+	promoter_tss	-0.141053	-2.6043	-3.95584	-3.37535	-1.62961	8.00943	16.0897	0.00659259	0.0110004	331	41	33	31	25	38	2	2	2	1	1	0	2	2	0	1	0	13	0
L2a:Gas8	Gas8									chr8	123533318	123536372	L2a	L2	LINE	NA	NA	NA	+	internal	6.20978	6.66845	8.89944	5.33136	8.82947	9.40043	42.462	4.7492e-08	3.41976e-07	332	0	0	14	12	20	5	11	7	36	51	9	1	1	10	21	49	64	0
RLTR21:Stx17	Stx17				X					chr4	48167256	48180669	RLTR21	ERVK	LTR	NA	NA	NA	+	internal	0.85599	-2.05105	0.33786	0.128947	1.5388	8.94777	6.55122	0.256212	0.269801	333	32	13	51	20	42	2	3	0	23	1	0	15	1	14	36	17	36	1
ORR1A1:Iqcf5	Iqcf5									chr9	106512517	106515549	ORR1A1	ERVL-MaLR	LTR	NA	NA	NA	+	promoter_tss	5.77695	1.61954	2.25166	3.02508	1.19692	7.53133	42.2824	5.16403e-08	3.66682e-07	334	0	1	26	35	51	1	1	0	1	2	0	2	4	1	0	1	1	0
B1_Mur1:Fam118a	Fam118a									chr15	85058825	85060088	NA	NA	NA	B1_Mur1	Alu	SINE	+	internal	-1.69766	6.278	4.17669	6.79638	3.97633	8.78429	25.8915	9.36663e-05	0.000282936	335	0	1	0	0	0	16	6	40	0	1	13	82	1	2	5	7	4	0
Lx7:Exoc4	Exoc4		X						X	chr6	33442039	33475996	NA	NA	NA	Lx7	L1	LINE	+	terminator	-0.590725	-4.90606	-0.735286	-7.35585	-1.43642	8.03203	13.8384	0.016669	0.0242965	336	41	32	19	27	22	0	1	0	0	20	0	0	0	0	0	7	10	2
MTA_Mm:Lrrfip1	Lrrfip1							X	X	chr1	91111325	91112155	MTA_Mm	ERVL-MaLR	LTR	NA	NA	NA	+	promoter_tss	-0.02238	-1.34859	-0.970182	-1.49499	-4.53695	8.30212	8.23222	0.143893	0.15766	337	57	16	36	27	37	4	7	3	1	15	1	0	16	0	0	2	0	2
MT2_Mm:Snapc3	Snapc3									chr4	83449162	83450070	MT2_Mm	ERVL	LTR	NA	NA	NA	+	promoter_tss	1.36664	8.89127	9.08944	5.58547	7.54276	9.51595	86.1263	4.36996e-17	2.23414e-15	338	0	0	0	0	1	19	25	74	38	33	45	2	2	10	12	24	21	0
B2_Mm2:Zfp936	Zfp936									chr7	43189150	43189301	B2_Mm2	B2	SINE	NA	NA	NA	+	internal	0	9.06173	3.91766	5.39681	3.70157	8.55181	64.3521	1.5271e-12	2.69218e-11	339	0	0	0	0	0	30	22	79	1	1	1	6	2	3	0	4	0	0
L1MB8:Fam96a	Fam96a									chr9	66133481	66133652	NA	NA	NA	L1MB8	L1	LINE	+	internal	0	4.51049	6.8492	8.63388	8.32882	9.01494	46.4297	7.42472e-09	6.63038e-08	340	0	0	0	0	0	2	1	2	2	13	10	73	1	27	46	39	20	0
MLT1A:Gm40447	Gm40447									chr12	75747968	75752685	NA	NA	NA	MLT1A	ERVL-MaLR	LTR	-	internal	7.47025	0	0	3.06842	7.12883	7.86389	47.481	4.53275e-09	4.27165e-08	341	0	0	35	25	51	0	0	0	0	0	0	1	1	0	5	16	20	0
B3A:Tex11	Tex11							X		chrX	100878225	100879976	B3A	B2	SINE	NA	NA	NA	-	terminator	-0.0498328	-1.98572	-3.40319	-2.65585	-5.25869	7.9521	39.738	1.68647e-07	1.02037e-06	342	25	47	40	30	27	3	4	2	1	2	0	2	2	3	0	0	1	1
L1M5:Slc25a51	Slc25a51									chr4	45400179	45404726	NA	NA	NA	L1M5	L1	LINE	-	internal/promoter_tss	-0.361734	3.00948	4.14167	2.67166	0.689514	9.17423	21.6218	0.00061775	0.00147927	343	6	6	4	2	7	13	24	13	42	38	20	0	29	24	2	13	0	0
B4A:Ccndbp1	Ccndbp1							X	X	chr2	121014018	121014512	NA	NA	NA	B4A	B4	SINE	+	internal	-0.674874	-1.64932	-4.79063	-4.27111	-7.32126	7.67116	41.3414	8.00468e-08	5.45652e-07	344	25	46	23	26	13	5	4	2	1	0	0	1	1	0	0	0	0	2
MTD:Cdc42bpa	Cdc42bpa									chr1	179975994	179999361	MTD	ERVL-MaLR	LTR	NA	NA	NA	+	promoter_tss	0.11735	-3.05756	-4.80592	-4.27108	-5.28839	7.84581	50.8368	9.34073e-10	1.02698e-08	345	32	39	37	36	35	2	2	0	0	1	0	1	1	0	1	0	0	0
L2a:Gas8	Gas8									chr8	123531036	123533252	NA	NA	NA	L2a	L2	LINE	+	internal/terminator	6.35213	5.78472	8.84739	5.06573	8.64211	9.25482	36.4182	7.83335e-07	3.92628e-06	346	0	0	14	12	25	3	7	2	46	39	6	1	0	9	23	65	37	0
L3:Stk38	Stk38									chr17	28975936	28977539	NA	NA	NA	L3	CR1	LINE	-	internal	-3.19795	2.14914	2.61206	3.08579	2.51816	9.21699	22.7485	0.000377049	0.000959037	347	1	16	2	0	0	9	6	28	1	24	29	18	60	14	24	35	14	0
MLT1M:Nf2	Nf2				X					chr11	4768273	4782186	MLT1M	ERVL-MaLR	LTR	NA	NA	NA	-	internal/terminator	-0.333133	7.01312	7.19611	3.4953	4.83984	9.24163	48.4501	2.87446e-09	2.89016e-08	348	0	1	0	0	1	15	22	68	28	51	19	1	0	10	18	2	9	1
MTA_Mm:Ldlrad4	Ldlrad4									chr18	67979492	68005684	MTA_Mm	ERVL-MaLR	LTR	NA	NA	NA	+	promoter_tss	-0.594302	-3.98281	-3.89327	-3.7242	-7.29869	7.55723	41.0695	9.08429e-08	6.05126e-07	349	31	39	20	23	22	1	1	0	1	1	0	1	2	0	0	0	0	0
MTA_Mm:Bbs9	Bbs9							X		chr9	22771306	22793750	MTA_Mm	ERVL-MaLR	LTR	NA	NA	NA	+	promoter_tss	-0.392965	-1.92627	-1.74813	-1.78907	-4.40833	7.9862	19.6914	0.0014278	0.00300088	350	34	36	31	22	21	4	3	2	2	3	5	4	8	0	0	1	1	1
MTA_Mm:Ppp1r12a	Ppp1r12a							X	X	chr10	108188523	108198832	MTA_Mm	ERVL-MaLR	LTR	NA	NA	NA	+	promoter_tss	-0.524737	-0.281329	-4.78532	-4.27716	-5.21441	7.96748	49.375	1.8601e-09	1.96078e-08	351	38	32	22	27	19	10	10	9	0	1	0	0	2	0	0	0	1	2
L3:Phtf2	Phtf2							X	X	chr5	20803350	20805654	NA	NA	NA	L3	CR1	LINE	-	internal	0.368061	4.17417	-2.21437	2.46736	-4.78695	8.76645	27.2358	5.13167e-05	0.000167373	352	11	1	15	1	5	27	26	68	1	0	0	0	41	2	0	0	0	2
MT2_Mm:Papd4	Papd4									chr13	93186476	93197026	NA	NA	NA	MT2_Mm	ERVL	LTR	-	promoter_tss	-2.45416	2.84593	5.7921	6.30288	6.26116	9.46098	76.7639	3.98426e-15	1.36652e-13	353	0	2	0	0	0	2	3	4	11	22	34	8	47	76	56	47	32	0
MTB:Dync1i2	Dync1i2								X	chr2	71216051	71219300	MTB	ERVL-MaLR	LTR	NA	NA	NA	+	promoter_tss	1.46538	-2.63049	-2.53892	-2.36927	-3.85012	7.57687	42.6828	4.28443e-08	3.12917e-07	354	11	16	33	35	38	1	1	0	1	1	0	1	2	0	0	0	1	1
RLTR1B-int:Usp14	Usp14				X					chr18	10024679	10044928	NA	NA	NA	RLTR1B-int	ERV1	LTR	-	promoter_tss	0	2.51012	7.7793	8.45716	6.12823	8.64283	30.7561	1.04651e-05	4.09982e-05	355	0	0	0	0	0	1	0	0	3	3	47	66	10	11	6	18	0	1
B1_Mur1:Fam118a	Fam118a									chr15	85060189	85061531	B1_Mur1	Alu	SINE	NA	NA	NA	+	internal	-2.95263	5.9764	1.562	5.49797	1.44055	9.05189	35.9612	9.66917e-07	4.75323e-06	356	0	3	0	0	0	26	11	86	1	0	4	76	1	7	2	1	3	0
MIR3:Tmem56	Tmem56									chr3	121235247	121235669	NA	NA	NA	MIR3	MIR	SINE	-	internal	0	5.10098	8.2356	8.49532	8.23024	9.21308	40.1169	1.41448e-07	8.83082e-07	357	0	0	0	0	0	1	3	4	21	14	30	0	69	38	40	14	37	0
MT2_Mm:Dym	Dym								X	chr18	75158980	75199162	MT2_Mm	ERVL	LTR	NA	NA	NA	+	promoter_tss	0	5.54156	8.60875	7.71524	8.71701	9.30346	44.3562	1.96087e-08	1.5976e-07	358	0	0	0	0	0	2	3	6	4	64	14	14	2	47	36	39	52	1
LTR78B:Wdtc1	Wdtc1									chr4	133296593	133297419	LTR78B	ERV1	LTR	NA	NA	NA	-	internal	3.57929	2.65403	4.48856	4.5056	5.38269	9.29198	53.2735	2.95534e-10	3.47338e-09	359	1	3	24	33	17	5	5	4	9	20	19	24	17	21	46	40	43	0
Lx5b:Gm3259	Gm3259									chr5	95306028	95309220	NA	NA	NA	Lx5b	L1	LINE	+	internal	2.1067	-5.27914	-2.76001	-2.21355	-5.27914	7.40593	40.934	9.67516e-08	6.40314e-07	360	12	5	30	21	54	0	0	0	0	1	0	1	1	0	0	0	0	0
RLTR12D:Atg4b	Atg4b			X						chr1	93751581	93768052	RLTR12D	ERVK	LTR	NA	NA	NA	+	promoter_tss	0	4.55764	7.54156	8.68581	7.11822	8.85794	44.2911	2.0215e-08	1.63398e-07	361	0	0	0	0	0	2	2	1	22	0	17	16	42	64	17	23	6	1
RSINE1:C330007P06Rik	C330007P06Rik									chrX	36815330	36852638	RSINE1	B4	SINE	NA	NA	NA	-	terminator	3.13551	8.11203	3.9163	7.86467	8.70258	9.1508	51.733	6.11969e-10	6.91424e-09	362	0	0	0	0	5	15	14	38	1	1	1	4	46	17	51	63	23	0
B1_Mur3:Folr1	Folr1				X					chr7	101864094	101866586	NA	NA	NA	B1_Mur3	Alu	SINE	-	promoter_tss	0	3.82336	7.91416	6.6717	8.68931	8.87074	32.1297	5.59996e-06	2.34671e-05	363	0	0	0	0	0	1	1	1	36	0	12	0	19	11	34	27	60	1
MT2C_Mm:Gm3183	Gm3183									chr5	94865584	94873769	MT2C_Mm	ERVL	LTR	NA	NA	NA	+	promoter_tss	0	6.65493	7.34423	8.93899	7.98075	9.22698	67.8495	2.86991e-13	5.98873e-12	364	0	0	0	0	0	7	7	9	10	9	16	27	16	105	46	30	9	0
LTR79:Btbd10	Btbd10							X	X	chr7	113364969	113368871	LTR79	ERVL	LTR	NA	NA	NA	-	internal	-1.56923	-3.90222	-0.792173	-7.25836	-7.25836	7.56823	24.2219	0.000196798	0.00054312	365	27	41	18	10	3	1	1	0	15	0	2	0	0	0	0	0	0	2
Lx5b:C87414	C87414									chr5	93668599	93671335	Lx5b	L1	LINE	NA	NA	NA	-	internal	-0.0682358	-3.31839	-7.25422	-1.57267	-7.25422	7.83333	21.5039	0.000650383	0.00154272	366	38	30	29	21	41	2	1	0	0	0	0	12	0	0	0	0	0	0
L2c:Tcte2	Tcte2									chr17	13717633	13727921	L2c	L2	LINE	NA	NA	NA	-	terminator	3.15003	-0.880206	-1.70423	-2.03858	-4.22711	7.35788	30.6338	1.10632e-05	4.30742e-05	367	8	0	32	36	36	1	1	0	0	1	0	0	1	0	0	0	0	0
MTC:Vdac2	Vdac2			X						chr14	21825348	21831850	MTC	ERVL-MaLR	LTR	NA	NA	NA	+	promoter_tss	0.435709	-3.61215	-3.53689	-2.94532	-4.89602	7.72989	41.3132	8.11029e-08	5.4919e-07	368	28	26	30	35	38	1	1	0	0	2	0	2	2	0	1	0	0	1
L2:Ncaph	Ncaph									chr2	127116654	127117505	NA	NA	NA	L2	L2	LINE	-	internal	-0.191605	-0.343263	0.0521957	1.02442	1.02992	9.34058	3.24605	0.662111	0.666347	369	22	43	26	26	28	12	7	6	14	0	19	15	64	2	33	26	33	0
MTC-int:Cfap53	Cfap53							X		chr18	74319698	74329399	MTC-int	ERVL-MaLR	LTR	NA	NA	NA	+	promoter_tss	-0.954542	-2.23646	-3.84978	-3.28185	-5.13623	7.53993	23.5614	0.000263556	0.00070362	370	14	53	10	19	20	3	2	2	0	2	0	1	3	0	0	0	1	1
LTR78:Strip1	Strip1									chr3	107618390	107618910	NA	NA	NA	LTR78	ERV1	LTR	-	internal	-3.64586	-0.223147	-1.24679	-3.23776	-1.14277	8.02942	14.4664	0.0129033	0.0196334	371	34	33	1	6	0	8	5	18	3	2	9	2	2	0	5	1	13	0
ORR1A4:Usp7	Usp7				X					chr16	8757072	8792235	NA	NA	NA	ORR1A4	ERVL-MaLR	LTR	-	promoter_tss	-0.680084	-1.00226	-0.961911	-1.18469	-0.981028	8.31943	2.19421	0.821671	0.823282	372	35	32	12	32	15	8	6	2	7	4	5	10	6	1	11	11	3	1
MTE2a:Luzp1	Luzp1							X	X	chr4	136521443	136539124	NA	NA	NA	MTE2a	ERVL-MaLR	LTR	+	internal	-0.84315	-4.77103	1.12982	-3.17782	-1.93278	8.4929	9.40745	0.0938749	0.107428	373	53	14	24	24	3	0	1	0	0	67	0	0	0	5	8	0	4	2
ORR1D1:Sil1	Sil1									chr18	35432551	35438266	ORR1D1	ERVL-MaLR	LTR	NA	NA	NA	-	internal	0.11021	0.387483	0.717552	1.75195	-0.989003	8.91546	5.57183	0.350134	0.361263	374	16	25	23	16	23	10	5	13	0	22	11	33	43	6	15	1	0	0
MTA_Mm:Fer	Fer									chr17	64001122	64029289	MTA_Mm	ERVL-MaLR	LTR	NA	NA	NA	+	promoter_tss	0.601284	-2.48943	-4.24299	-2.47623	-4.72899	7.7242	37.2424	5.35528e-07	2.84456e-06	375	24	24	38	33	31	2	2	0	0	1	0	2	3	0	1	0	0	0
ID_B1:Tprkb	Tprkb									chr6	85921511	85924359	ID_B1	B4	SINE	NA	NA	NA	+	internal/promoter	-3.31188	4.11163	4.23455	5.89282	5.16466	9.58518	40.7142	1.07164e-07	7.02408e-07	376	2	2	0	0	0	10	16	13	19	15	3	12	6	171	36	58	22	0
L1ME3D:Cdadc1	Cdadc1									chr14	59568038	59568947	L1ME3D	L1	LINE	NA	NA	NA	-	terminator	1.18774	2.7841	-2.94206	5.57848	3.0799	8.34591	32.8443	4.04112e-06	1.75832e-05	377	2	1	8	0	2	4	3	5	0	0	0	46	19	34	0	10	9	0
MTA_Mm:Map3k5	Map3k5								X	chr10	19996892	20000565	MTA_Mm	ERVL-MaLR	LTR	NA	NA	NA	+	promoter_tss	0.435141	-4.44669	-3.49073	-2.94066	-6.89908	7.68491	43.1167	3.49911e-08	2.63077e-07	378	26	27	30	40	31	1	0	0	1	1	0	1	3	0	0	0	0	1
RMER21A:Tyms	Tyms			X	X					chr5	30068640	30069833	RMER21A	ERV1	LTR	NA	NA	NA	-	internal	0	0	8.7432	5.96241	5.03051	8.36225	36.7237	6.80405e-07	3.48729e-06	379	0	0	0	0	0	0	0	0	2	74	14	2	2	15	5	6	0	2
MT2B:Rbm17	Rbm17									chr2	11600756	11604005	NA	NA	NA	MT2B	ERVL	LTR	-	promoter_tss	0	6.76814	8.91005	6.73521	5.03348	8.7875	46.1763	8.36167e-09	7.27643e-08	380	0	0	0	0	0	7	8	10	24	41	38	12	0	18	9	2	0	0
RMER6A:Lpcat2	Lpcat2									chr8	92908173	92908795	RMER6A	ERVK	LTR	NA	NA	NA	+	promoter_tss	-0.516183	-2.92091	-3.24452	-2.28908	-5.09276	7.65975	23.8656	0.000230409	0.000624915	381	21	44	28	24	11	2	2	0	1	2	0	2	5	1	0	0	1	0
MT2B1:BC147527	BC147527						X	X	X	chr13	120307930	120308117	MT2B1	ERVL	LTR	NA	NA	NA	+	internal/promoter_tss	1.62144	2.92907	-1.73388	-0.731748	1.92	8.99709	19.3448	0.00165756	0.00343435	382	7	16	41	36	23	21	25	50	2	1	0	2	1	6	17	0	38	3
MLT1D:Ston2	Ston2							X	X	chr12	91735468	91740470	MLT1D	ERVL-MaLR	LTR	NA	NA	NA	-	internal/terminator	1.10685	1.87777	-2.81305	0.564392	-2.00844	8.61907	19.3403	0.00166081	0.0034376	383	6	27	42	32	26	26	20	14	1	1	0	21	1	6	5	1	0	2
MT2B:Poc5	Poc5									chr13	96391675	96393226	MT2B	ERVL	LTR	NA	NA	NA	+	internal	-0.0405226	0.908158	0.109622	-0.891506	-2.10806	8.90274	8.10953	0.150301	0.164104	384	31	34	36	20	32	24	25	10	18	11	2	15	0	5	6	4	1	0
B3A:Tfcp2	Tfcp2									chr15	100509674	100511694	B3A	B2	SINE	NA	NA	NA	-	terminator	-1.29943	3.38889	4.31249	3.57574	2.77891	9.54015	26.5252	7.0562e-05	0.000220979	385	10	1	0	0	6	12	12	42	6	50	57	30	15	40	12	17	23	0
ORR1B2:Nrg4	Nrg4							X	X	chr9	55242207	55292020	NA	NA	NA	ORR1B2	ERVL-MaLR	LTR	-	promoter_tss	1.80633	-0.471466	-5.50932	-2.4513	-5.50932	7.5057	40.3213	1.28633e-07	8.19484e-07	386	13	7	37	30	32	3	3	1	0	0	0	1	1	0	0	0	0	2
RMER10A:Folr1	Folr1				X					chr7	101864094	101867277	NA	NA	NA	RMER10A	ERVL	LTR	-	promoter_tss	0	5.74779	8.59109	8.72959	8.49476	9.48955	65.8344	7.52289e-13	1.43779e-11	387	0	0	0	0	0	4	4	4	22	17	46	44	6	71	58	45	17	1
RLTR16B_MM:Prrc1	Prrc1				X					chr18	57374083	57374526	RLTR16B_MM	ERVK	LTR	NA	NA	NA	+	promoter_tss	0	0	8.81733	7.99029	7.6781	9.08961	40.0348	1.46941e-07	8.99681e-07	388	0	0	0	0	0	0	0	0	1	65	32	45	2	18	23	36	9	1
MT2_Mm:Dnajb14	Dnajb14									chr3	137875110	137885272	MT2_Mm	ERVL	LTR	NA	NA	NA	+	promoter_tss	0	6.05688	8.88803	5.44854	6.46971	8.6801	59.99	1.22128e-11	1.83641e-10	389	0	0	0	0	0	4	6	5	43	22	34	1	2	10	23	5	2	0
LFSINE_Vert:Ankhd1	Ankhd1									chr18	36640360	36641576	NA	NA	NA	LFSINE_Vert	tRNA	SINE	+	internal	-0.227214	0.768675	-2.84439	-3.18927	-0.407664	8.5867	22.8178	0.000365734	0.000936078	390	33	31	30	34	12	18	13	26	2	1	1	2	2	0	9	3	19	0
MURVY-LTR:Trim61	Trim61							X	X	chr8	65014900	65017332	NA	NA	NA	MURVY-LTR	ERV1	LTR	-	internal	-0.769297	-4.73881	-4.6504	-4.11075	-7.16575	7.36281	40.8766	9.93683e-08	6.5551e-07	391	40	24	20	18	14	0	1	0	0	1	0	1	1	0	0	0	0	2
MT2C_Mm:Cd86	Cd86									chr16	36569272	36573965	NA	NA	NA	MT2C_Mm	ERVL	LTR	-	promoter_tss	0	4.51419	5.94867	8.276	2.8054	8.04964	29.7553	1.64779e-05	6.10458e-05	392	0	0	0	0	0	2	1	2	0	0	15	38	32	11	0	2	0	0
MIRc:Prr14	Prr14									chr7	127473986	127474378	NA	NA	NA	MIRc	MIR	SINE	+	internal	2.38542	0.137551	3.40554	3.56091	3.34228	9.23069	24.1001	0.000207702	0.00056937	393	8	3	28	21	34	3	2	1	8	10	44	30	41	9	39	32	14	0
MTEb:Mtf2	Mtf2				X					chr5	108069363	108080824	MTEb	ERVL-MaLR	LTR	NA	NA	NA	+	internal	-0.088858	-3.26455	-0.653422	-4.07424	-0.84239	8.14277	11.8493	0.0369119	0.0481102	394	27	36	28	35	20	1	2	0	16	1	0	1	1	0	17	9	1	1
L1MEd:Dram2	Dram2									chr3	106552280	106555163	L1MEd	L1	LINE	NA	NA	NA	+	internal/promoter_tss	-0.313236	-3.24477	0.668435	0.48255	0.894129	9.09812	5.41662	0.367175	0.378083	395	30	33	23	29	19	1	2	0	42	0	0	0	41	17	27	11	39	0
B2_Mm2:Nkiras1	Nkiras1									chr14	18276968	18277843	NA	NA	NA	B2_Mm2	B2	SINE	+	internal	-0.884153	0.54644	0.282711	0.515043	-0.955487	8.96546	2.56557	0.766589	0.769977	396	32	31	11	23	14	16	20	9	10	16	10	0	55	2	7	18	0	0
IAPEY5_LTR:Tmem232	Tmem232						X	X	X	chr17	65436386	65442222	NA	NA	NA	IAPEY5_LTR	ERVK	LTR	-	promoter_tss	0.993207	-2.95208	-3.75354	-3.21586	-6.26787	7.50105	45.1211	1.37094e-08	1.149e-07	397	13	21	29	29	38	1	1	0	0	1	0	1	1	0	0	0	0	3
B3A:Gm35588	Gm35588									chr7	43257557	43260685	B3A	B2	SINE	NA	NA	NA	+	internal/promoter_tss	-1.51765	-7.12702	0.567992	0.978039	0.785346	9.03251	23.4676	0.000274693	0.000729543	398	22	40	11	1	18	0	0	0	7	19	19	12	33	35	19	3	45	0
MTA_Mm:Pla2g4c	Pla2g4c							X	X	chr7	13329416	13329647	MTA_Mm	ERVL-MaLR	LTR	NA	NA	NA	+	promoter_tss	-0.307533	-3.8068	-4.59016	-4.07048	-7.12218	7.50647	44.5723	1.77239e-08	1.44982e-07	399	34	28	24	21	25	1	1	0	1	0	0	1	1	0	0	0	0	2
HAL1:Ift81	Ift81									chr5	122559768	122560658	NA	NA	NA	HAL1	L1	LINE	-	internal	0.724337	-0.833828	2.02431	-0.516049	-2.29869	8.79514	17.2852	0.0039895	0.00713781	400	25	16	34	24	37	4	6	1	28	29	21	0	17	1	3	3	0	0
PB1D9:Pitpnc1	Pitpnc1									chr11	107454662	107469890	PB1D9	Alu	SINE	NA	NA	NA	-	terminator	0	8.94346	6.68859	5.39172	4.86511	8.67771	45.5444	1.12438e-08	9.58068e-08	401	0	0	0	0	0	22	15	88	2	3	19	4	6	1	0	7	2	0
MER68:Cul5	Cul5			X	X					chr9	53655371	53657957	NA	NA	NA	MER68	ERVL	LTR	-	internal	-0.562646	-0.96225	2.08806	1.20527	-1.75637	9.33957	21.149	0.000759201	0.00175829	402	32	24	17	11	25	6	5	3	11	31	81	26	41	11	0	11	1	2
L1_Rod:Cobll1	Cobll1								X	chr2	65089557	65090621	NA	NA	NA	L1_Rod	L1	LINE	-	internal	-2.59896	-7.12051	-7.12051	-7.12051	-7.12051	6.89594	37.0958	5.73046e-07	3.01254e-06	403	38	24	2	9	3	0	0	0	0	0	0	0	0	0	0	0	0	1
MTA_Mm:Pakap	Pakap									chr4	57863967	57892868	MTA_Mm	ERVL-MaLR	LTR	NA	NA	NA	+	promoter_tss	-0.188728	-7.11815	-3.70779	-3.12914	-5.01294	7.57479	37.693	4.34869e-07	2.34646e-06	404	44	18	24	29	23	0	0	0	1	1	0	2	2	0	0	0	1	0
MT2_Mm:Sgk3	Sgk3			X	X					chr1	9875649	9877165	MT2_Mm	ERVL	LTR	NA	NA	NA	+	promoter_tss	0	5.86443	8.91924	8.07203	8.08993	9.32139	69.0051	1.65053e-13	3.7925e-12	405	0	0	0	0	0	4	5	4	32	23	50	10	13	59	49	34	9	2
RLTR51A_Mm:Fancl	Fancl				X					chr11	26468717	26468800	RLTR51A_Mm	ERVK?	LTR	NA	NA	NA	+	internal	-1.08284	1.72162	5.59274	5.88987	5.63067	9.04333	36.3933	7.92377e-07	3.96189e-06	406	2	0	0	0	1	1	1	2	0	29	30	56	9	17	24	41	21	1
RLTR31C_MM:Mllt10	Mllt10								X	chr2	18131148	18146776	RLTR31C_MM	ERVK	LTR	NA	NA	NA	+	promoter_tss	0.894295	-1.01361	-2.40666	-2.77918	-3.41246	7.70396	30.2124	1.33946e-05	5.082e-05	407	14	22	37	24	33	3	3	3	1	2	0	1	2	0	0	0	2	1
MTD:Ywhaq	Ywhaq									chr12	21391415	21391716	NA	NA	NA	MTD	ERVL-MaLR	LTR	-	internal	1.385	5.56286	2.47371	7.49369	8.54439	8.57567	79.4729	1.0817e-15	4.02196e-14	408	0	0	1	0	0	3	2	6	0	0	1	14	27	8	31	40	43	0
MIR3:Lsm6	Lsm6									chr8	78820085	78821047	MIR3	MIR	SINE	NA	NA	NA	-	internal	-1.56252	-1.5647	0.969584	1.50003	2.19281	9.04422	38.9898	2.38605e-07	1.37838e-06	409	9	27	2	5	10	2	3	1	8	14	12	11	31	24	32	46	38	0
B1_Mus2:Timm9	Timm9									chr12	71133997	71136554	B1_Mus2	Alu	SINE	NA	NA	NA	-	internal	0	7.05374	8.68203	6.34324	6.88815	8.81309	37.2428	5.35419e-07	2.84456e-06	410	0	0	0	0	0	6	12	13	42	29	11	0	1	25	13	13	11	0
MT2_Mm:Ddit4l	Ddit4l									chr3	137621629	137624131	MT2_Mm	ERVL	LTR	NA	NA	NA	+	internal/promoter_tss	0	8.84228	7.56235	5.62003	0	8.73287	66.9147	4.48819e-13	8.99838e-12	411	0	0	0	0	0	17	24	74	13	17	9	1	1	13	0	0	0	0
MT2C_Mm:Cst7	Cst7									chr2	150549367	150575703	MT2C_Mm	ERVL	LTR	NA	NA	NA	+	promoter_tss	0	6.69202	5.23899	6.46572	8.51902	8.54675	62.5683	3.5765e-12	5.9463e-11	412	0	0	0	0	0	5	5	15	2	2	4	2	17	6	43	37	35	0
RMER19B:Ccdc73	Ccdc73							X		chr2	104867893	104907540	RMER19B	ERVK	LTR	NA	NA	NA	+	promoter_tss	0.632034	-3.27888	-3.19029	-3.02156	-6.59804	7.58008	39.5755	1.81863e-07	1.08746e-06	413	25	18	38	21	34	1	1	0	1	1	0	1	2	0	0	0	0	1
RLTR10B2:BC051019	BC051019									chr7	109720687	109720958	NA	NA	NA	RLTR10B2	ERVK	LTR	-	promoter_tss	-1.20369	-3.7646	-4.56584	-4.0283	-7.08008	7.22327	37.0557	5.83755e-07	3.05314e-06	414	21	39	15	10	11	1	1	0	0	1	0	1	1	0	0	0	0	0
MTD:Dnm3	Dnm3									chr1	162407408	162424454	NA	NA	NA	MTD	ERVL-MaLR	LTR	-	promoter_tss	1.70375	-0.942261	-2.97837	-3.31239	-3.36565	7.42879	22.3825	0.000442792	0.00110159	415	20	0	31	23	38	2	2	1	0	1	0	0	1	0	0	0	1	0
B2_Mm2:4933434E20Rik	4933434E20Rik									chr3	90058800	90060361	NA	NA	NA	B2_Mm2	B2	SINE	+	terminator	0	8.0501	8.64595	8.11504	8.53313	9.581	65.8105	7.60908e-13	1.44079e-11	416	0	0	0	0	0	11	12	43	6	40	43	10	29	43	35	57	27	0
L1_Mur2:Ctnna3	Ctnna3						X			chr10	64975737	65002545	L1_Mur2	L1	LINE	NA	NA	NA	+	promoter_tss	1.13348	-1.00877	-2.63498	-3.01972	-6.04006	7.53734	36.7783	6.63482e-07	3.4091e-06	417	13	16	21	23	47	3	3	1	1	1	0	0	2	0	0	0	0	1
RLTR21:Stx17	Stx17				X					chr4	48167043	48167205	NA	NA	NA	RLTR21	ERVK	LTR	+	internal	0.421627	-1.89287	-0.0379483	-1.29849	0.937017	8.59608	4.54285	0.474171	0.482427	418	36	13	39	20	32	3	3	0	20	0	0	9	0	2	30	16	20	1
X3_LINE:Hook2	Hook2									chr8	84997448	84997999	X3_LINE	RTE-BovB	LINE	NA	NA	NA	+	internal	-0.198568	-2.78158	-2.12318	0.12424	1.08924	8.73512	18.6973	0.00218822	0.00434035	419	31	28	23	31	18	2	2	0	5	0	1	14	17	8	11	28	43	0
MTA_Mm:Glcci1	Glcci1							X	X	chr6	8536041	8537816	MTA_Mm	ERVL-MaLR	LTR	NA	NA	NA	+	promoter_tss	-0.084953	-2.51209	-3.66325	-2.33198	-4.10761	7.70814	27.7004	4.16496e-05	0.000139858	420	32	27	24	36	18	2	2	1	0	2	0	2	4	1	0	0	2	2
MIRc:Pola1	Pola1									chrX	93561490	93561869	NA	NA	NA	MIRc	MIR	SINE	-	internal	-0.595728	-1.62978	2.64058	1.17856	1.21311	9.07705	22.1948	0.000480776	0.00118314	421	21	11	2	27	1	2	2	1	15	38	46	13	14	19	21	10	20	0
L2:Ddx17	Ddx17									chr15	79530517	79531671	NA	NA	NA	L2	L2	LINE	-	internal/promoter_tss	0	6.64732	6.25119	8.53393	8.20055	8.99355	45.0299	1.43069e-08	1.18933e-07	422	0	0	0	0	0	9	7	6	12	0	3	30	17	60	28	58	12	0
B3:Ak4	Ak4			X						chr4	101419965	101422184	NA	NA	NA	B3	B2	SINE	+	terminator	-1.04319	-4.52938	-7.03008	-1.35053	-0.0298637	7.88352	14.5619	0.0124079	0.0190069	423	24	34	15	11	13	1	0	0	0	0	0	12	0	0	9	1	25	1
MT2B2:Esyt1	Esyt1								X	chr10	128512464	128515685	NA	NA	NA	MT2B2	ERVL	LTR	-	internal	-1.51341	0.822474	-0.463449	-2.39034	-0.137987	8.5606	9.41271	0.0936923	0.107279	424	27	31	10	13	5	15	21	16	16	2	0	1	2	4	3	8	22	1
L1_Mus1:Prr32	Prr32								X	chrX	45057305	45090894	L1_Mus1	L1	LINE	NA	NA	NA	+	internal	-3.23671	-3.71867	-3.11362	-2.14004	-4.93832	7.12318	28.2985	3.18207e-05	0.000109367	425	30	28	4	1	3	1	1	0	1	1	1	2	4	2	0	0	1	1
MTE2a:Cacna2d3	Cacna2d3									chr14	28908398	28943556	MTE2a	ERVL-MaLR	LTR	NA	NA	NA	-	internal	0.415462	-2.47501	-4.21594	-3.69582	-6.75511	7.59048	36.8186	6.51245e-07	3.35465e-06	426	28	20	37	38	14	2	2	0	1	0	0	1	1	0	0	0	0	0
B3A:Emd	Emd									chrX	74256924	74260781	NA	NA	NA	B3A	B2	SINE	+	terminator	2.30523	2.72572	1.46885	4.82765	3.53813	8.44019	11.1966	0.0476177	0.0599474	427	0	4	4	11	16	8	3	3	1	1	4	64	2	1	20	19	1	0
L2:Stk38	Stk38									chr17	28974377	28974545	L2	L2	LINE	NA	NA	NA	-	internal	-0.761897	1.51474	2.59525	1.9861	2.42865	9.51307	10.2932	0.0673415	0.0799265	428	3	25	19	1	2	11	8	25	7	18	65	9	56	5	48	27	33	0
RLTR20C2_MM:Nbn	Nbn									chr4	15971863	15976034	RLTR20C2_MM	ERVK	LTR	NA	NA	NA	+	internal	0.428787	0.597306	3.93566	3.02957	2.36946	9.05765	17.0335	0.00443671	0.00784868	429	10	2	5	7	11	4	3	2	11	45	36	48	0	7	20	16	10	0
RLTR51A_Mm:Fancl	Fancl				X					chr11	26468418	26468671	NA	NA	NA	RLTR51A_Mm	ERVK?	LTR	+	internal	0.69287	2.47523	5.5104	5.69115	6.00283	9.10617	28.9966	2.32237e-05	8.28839e-05	430	2	0	0	4	1	2	1	4	0	26	30	49	10	12	41	41	29	1
MIR3:Pdxdc1	Pdxdc1									chr16	13834846	13836385	MIR3	MIR	SINE	NA	NA	NA	-	terminator	1.70358	3.01341	4.51041	3.72941	3.44325	9.35247	14.7249	0.0116048	0.0178838	431	6	2	11	10	17	12	11	11	38	19	33	50	0	12	15	19	27	0
MTEb:Mtf2	Mtf2				X					chr5	108065965	108069161	NA	NA	NA	MTEb	ERVL-MaLR	LTR	+	internal	-0.0772633	-2.19708	0.291815	-1.56699	0.98831	8.74361	11.0214	0.0509573	0.0633866	432	28	29	22	31	23	2	3	1	3	28	1	4	2	6	10	22	41	1
MTA_Mm:Tox3	Tox3							X	X	chr8	90274694	90320757	NA	NA	NA	MTA_Mm	ERVL-MaLR	LTR	-	promoter_tss	-0.304669	-4.57246	-4.4846	-3.94295	-7.00102	7.40734	39.19	2.17462e-07	1.2706e-06	433	33	24	17	15	33	0	1	0	0	1	0	1	1	0	0	0	0	2
B1_Mus2:Rcc2	Rcc2			X	X					chr4	140717730	140720544	NA	NA	NA	B1_Mus2	Alu	SINE	+	internal	0	3.26712	7.67182	8.47358	7.53941	8.84703	35.9812	9.58061e-07	4.72105e-06	434	0	0	0	0	0	1	0	1	14	0	32	30	17	55	12	3	36	2
ORR1A1:Lmbr1	Lmbr1									chr5	29331131	29346766	ORR1A1	ERVL-MaLR	LTR	NA	NA	NA	-	terminator	1.04408	-1.55714	-1.77781	-0.728609	-4.0073	7.67047	31.3742	7.9011e-06	3.21228e-05	435	16	14	33	24	30	2	2	1	1	2	1	4	5	2	0	0	1	0
ID4_:Paip2b	Paip2b							X	X	chr6	83809116	83809898	ID4_	ID	SINE	NA	NA	NA	-	terminator	0	2.35729	6.61341	5.22031	8.4352	8.29161	64.2997	1.56581e-12	2.6973e-11	436	0	0	0	0	0	0	0	1	2	6	14	3	5	2	27	33	44	2
PB1D7:Mrpl45	Mrpl45									chr11	97325757	97326607	NA	NA	NA	PB1D7	Alu	SINE	+	internal	1.81728	0.685524	1.7345	1.2225	3.41753	8.78572	11.3396	0.045048	0.0571483	437	8	6	30	22	18	6	3	2	14	0	8	11	8	0	33	32	40	0
MT2B1:Tead4	Tead4			X	X					chr6	128271122	128306365	NA	NA	NA	MT2B1	ERVL	LTR	-	promoter_tss	0	4.95749	7.62059	8.51146	4.60013	8.5825	41.3193	8.08752e-08	5.4919e-07	438	0	0	0	0	0	2	2	3	0	27	16	32	13	60	5	3	0	2
L1M3e:Anapc10	Anapc10				X					chr8	79732812	79774931	L1M3e	L1	LINE	NA	NA	NA	+	internal	-1.97209	3.91543	3.28942	1.87532	4.33617	8.96761	32.4704	4.79364e-06	2.04229e-05	439	0	7	2	0	0	10	12	41	5	23	6	3	3	12	35	21	45	1
B3:Pigu	Pigu									chr2	155290621	155292689	B3	B2	SINE	NA	NA	NA	-	terminator	-0.921916	-2.94841	-0.779175	-0.657004	1.58489	8.61733	17.5447	0.00357463	0.00652588	440	21	29	20	10	6	1	2	0	5	8	0	3	5	13	25	13	58	0
B1F:Xpo4	Xpo4									chr14	57642160	57643081	B1F	Alu	SINE	NA	NA	NA	-	terminator	-1.69563	5.38326	7.22423	5.58419	4.99407	9.03923	51.9136	5.6194e-10	6.38426e-09	441	0	1	0	0	0	6	7	20	26	14	69	2	23	21	8	6	16	0
ID_B1:Papd4	Papd4									chr13	93168467	93171451	NA	NA	NA	ID_B1	B4	SINE	-	promoter_tss	0.326051	-2.25068	-4.27853	-3.74	-4.69438	7.60535	35.5024	1.19433e-06	5.74746e-06	442	11	38	35	32	19	2	2	1	0	1	0	1	1	0	0	0	1	0
B3:Golgb1	Golgb1									chr16	36875263	36885010	NA	NA	NA	B3	B2	SINE	+	internal	-0.95918	-4.46237	-2.27633	-1.32198	-2.96622	7.54848	6.38138	0.270857	0.283762	443	37	19	22	16	1	1	0	0	4	0	1	11	0	1	0	0	4	0
MT2C_Mm:Pcgf5	Pcgf5									chr19	36392298	36411955	MT2C_Mm	ERVL	LTR	NA	NA	NA	+	promoter_tss	0	8.0957	8.65265	7.43038	7.47147	9.24477	37.9879	3.79439e-07	2.09717e-06	444	0	0	0	0	0	19	25	17	45	15	22	4	11	38	31	31	0	0
ID_B1:Caln1	Caln1							X		chr5	130506188	130550357	NA	NA	NA	ID_B1	B4	SINE	+	terminator	4.62311	-2.44339	-2.44339	-2.44339	-2.44339	7.03885	35.3025	1.30934e-06	6.24151e-06	445	2	0	14	30	41	0	0	0	0	0	0	0	0	0	0	0	0	1
L3:Tcea3	Tcea3									chr4	136248117	136253745	NA	NA	NA	L3	CR1	LINE	+	internal	0.875909	-2.90666	-3.70539	-3.16952	-4.18928	7.42774	39.6794	1.73299e-07	1.04542e-06	446	22	11	30	31	24	1	1	0	0	1	0	1	1	0	1	0	0	0
L1_Rod:Cobll1	Cobll1								X	chr2	65090740	65095687	L1_Rod	L1	LINE	NA	NA	NA	-	internal	-2.5405	-6.94932	-6.94932	-6.94932	-6.94932	6.80795	34.3961	1.98548e-06	9.08345e-06	447	33	22	1	5	7	0	0	0	0	0	0	0	0	0	0	0	0	1
B1_Mur4:Gm40447	Gm40447									chr12	75754036	75764676	NA	NA	NA	B1_Mur4	Alu	SINE	-	promoter_tss	7.06597	0	0	0	0	7.0191	28.642	2.72544e-05	9.51114e-05	448	0	0	24	17	43	0	0	0	0	0	0	0	0	0	0	0	0	0
AmnSINE1:Epn2	Epn2							X	X	chr11	61535383	61544157	NA	NA	NA	AmnSINE1	Deu	SINE	-	internal	0.0565425	-3.63333	-4.43435	-3.89697	-4.85227	7.54478	40.0875	1.4339e-07	8.83082e-07	449	35	20	37	21	21	1	1	0	0	1	0	1	1	0	0	0	1	2
MIR3:Erich1	Erich1									chr8	14064339	14078769	MIR3	MIR	SINE	NA	NA	NA	-	internal	-3.31118	-0.456177	1.31921	2.39566	3.04069	8.77836	11.6574	0.0397968	0.0513466	450	16	2	0	2	0	3	3	0	19	0	0	29	0	30	25	37	40	0
MT2B:Gpbp1	Gpbp1							X	X	chr13	111488370	111498329	NA	NA	NA	MT2B	ERVL	LTR	-	promoter_tss	0	8.60337	6.65591	0	0	8.28586	42.5995	4.45416e-08	3.24155e-07	451	0	0	0	0	0	22	20	52	15	0	5	0	0	0	0	0	0	2
L3:Vps4a	Vps4a									chr8	107031491	107036636	NA	NA	NA	L3	CR1	LINE	+	internal	2.3453	-0.507914	5.56551	3.41716	2.22311	8.38859	23.5989	0.000259227	0.000692968	452	1	2	8	5	11	0	1	0	6	55	16	15	0	6	2	10	0	0
LFSINE_Vert:Jmjd6	Jmjd6									chr11	116839128	116839837	NA	NA	NA	LFSINE_Vert	tRNA	SINE	-	internal	0.24228	2.36265	1.54892	-1.12493	-1.0148	8.97444	14.65	0.0119676	0.0183874	453	24	10	22	13	21	16	24	57	4	39	3	2	2	6	1	0	9	0
ID_B1:Aurkc	Aurkc									chr7	6996301	6997513	ID_B1	B4	SINE	NA	NA	NA	+	internal	-1.57994	-1.76245	-2.30395	0.476706	-0.330368	8.21216	8.05619	0.153166	0.167053	454	12	42	8	16	1	3	2	3	3	0	2	21	14	10	4	1	21	0
MTA_Mm:Pcgf6	Pcgf6									chr19	47042793	47044325	NA	NA	NA	MTA_Mm	ERVL-MaLR	LTR	-	promoter_tss	0.0675629	-2.38693	-4.4123	-3.87665	-4.83328	7.58611	38.6182	2.8343e-07	1.59674e-06	455	27	27	21	16	43	2	2	1	0	1	0	1	1	0	0	0	1	0
RMER19B:Lsm1	Lsm1							X		chr8	25797059	25801927	RMER19B	ERVK	LTR	NA	NA	NA	+	internal	-0.52781	-3.6113	-2.97869	-2.02026	-3.52974	7.49417	21.5976	0.000624323	0.00149326	456	30	24	10	17	26	1	1	0	1	2	0	2	5	1	0	2	1	1
ORR1A1:Atad2b	Atad2b						X	X		chr12	4982198	4990871	ORR1A1	ERVL-MaLR	LTR	NA	NA	NA	+	promoter_tss	0	8.65679	2.44697	7.21274	7.19952	8.75425	45.6764	1.05697e-08	9.08191e-08	457	0	0	0	0	0	20	17	63	0	0	1	1	36	5	24	19	6	2
ORR1B1:Hcfc2	Hcfc2								X	chr10	82771468	82795620	ORR1B1	ERVL-MaLR	LTR	NA	NA	NA	+	promoter_tss	1.52448	-0.503113	-2.99117	-2.48555	-3.40638	7.40158	29.5275	1.82674e-05	6.71885e-05	458	16	4	22	26	34	3	2	2	0	1	0	0	2	0	0	0	1	1
RMER19B:Ppih	Ppih									chr4	119307883	119310758	RMER19B	ERVK	LTR	NA	NA	NA	-	terminator	0	6.37446	8.86983	8.15664	8.07483	9.34864	60.018	1.20508e-11	1.82547e-10	459	0	0	0	0	0	4	4	12	8	27	73	11	31	42	13	38	31	0
L2b:Pecam1	Pecam1									chr11	106683620	106684227	NA	NA	NA	L2b	L2	LINE	-	internal	-1.9658	-1.32112	2.11104	2.39776	0.6223	9.23819	21.4178	0.000675281	0.00158959	460	13	23	10	2	0	2	4	1	20	42	10	9	12	115	20	10	10	0
B3:Ccdc28a	Ccdc28a									chr10	18218392	18219487	B3	B2	SINE	NA	NA	NA	-	terminator	-0.705488	-0.522809	2.36358	-2.54034	0.0799936	8.52088	11.4679	0.042853	0.054669	461	8	23	14	7	5	2	2	8	0	57	21	1	2	0	0	1	18	0
MT2B2:Pin1rt1	Pin1rt1									chr2	104714802	104716328	NA	NA	NA	MT2B2	ERVL	LTR	-	promoter_tss	4.74277	7.16099	6.94636	8.72453	7.85748	9.14863	33.8448	2.55655e-06	1.14225e-05	462	0	0	8	0	8	8	12	13	10	11	4	13	12	107	27	25	21	0
LTRIS_Mus:Obox2	Obox2								X	chr7	15388709	15396799	LTRIS_Mus	ERV1	LTR	NA	NA	NA	+	promoter_tss	-0.187519	-2.36119	-3.51362	-2.18234	-3.95206	7.59113	22.2824	0.000462668	0.00113995	463	17	36	25	26	14	2	2	1	0	2	0	2	4	1	0	0	2	1
L1M3e:Anapc10	Anapc10				X					chr8	79729250	79732780	NA	NA	NA	L1M3e	L1	LINE	+	internal	-3.16463	3.13683	2.88035	1.38704	3.76472	8.88188	33.7111	2.71797e-06	1.21095e-05	464	0	10	1	0	0	9	10	32	6	23	7	3	3	12	34	21	41	1
B3:Dscc1	Dscc1									chr15	55083593	55084048	B3	B2	SINE	NA	NA	NA	-	internal	0	0	7.44204	7.83457	8.2711	8.77313	37.8858	3.97781e-07	2.17503e-06	465	0	0	0	0	0	0	0	0	9	10	19	0	41	27	47	6	40	0
MT2C_Mm:Cux2	Cux2			X	X					chr5	121898355	121914965	NA	NA	NA	MT2C_Mm	ERVL	LTR	-	promoter_tss	0	2.31609	0	0	8.2941	7.79969	49.1568	2.06133e-09	2.129e-08	466	0	0	0	0	0	0	0	1	0	0	0	0	0	0	21	15	53	2
RLTR24:Mrpl22	Mrpl22			X	X					chr11	58170526	58171505	RLTR24	ERV1	LTR	NA	NA	NA	+	promoter_tss	0	0	8.35294	4.59322	5.2725	7.99836	25.437	0.000114709	0.000338499	467	0	0	0	0	0	0	0	0	1	60	7	1	1	5	0	13	0	2
L3:Rbm10	Rbm10									chrX	20642830	20644671	NA	NA	NA	L3	CR1	LINE	+	internal	0	0	8.62126	0	5.7171	8.16028	18.3384	0.00255087	0.00495867	468	0	0	0	0	0	0	0	0	51	0	30	0	0	0	0	0	13	0
MT2C_Mm:Zfp821	Zfp821									chr8	109695340	109706356	MT2C_Mm	ERVL	LTR	NA	NA	NA	+	promoter_tss	0	5.75175	5.90836	8.60429	3.40452	8.36023	43.3822	3.09123e-08	2.35879e-07	469	0	0	0	0	0	4	4	4	8	1	3	27	2	88	0	2	1	0
MT2_Mm:T2	T2								X	chr17	8337561	8372394	MT2_Mm	ERVL	LTR	NA	NA	NA	+	promoter_tss	0	7.31569	8.44315	6.65059	4.89083	8.6088	26.1896	8.19899e-05	0.000251756	470	0	0	0	0	0	11	16	8	61	1	4	1	2	29	7	3	0	1
MT2C_Mm:Gm7792	Gm7792									chr5	93843895	93852074	MT2C_Mm	ERVL	LTR	NA	NA	NA	+	promoter_tss	0	6.06475	7.13496	8.4958	7.70808	8.88614	62.9743	2.94712e-12	4.94005e-11	471	0	0	0	0	0	5	5	5	8	10	12	21	13	74	23	40	7	0
RSINE1:Cd300c	Cd300c									chr11	114957644	114959192	NA	NA	NA	RSINE1	B4	SINE	-	internal	-0.662679	-6.84801	-4.32653	-3.77616	-6.84801	7.1788	29.8168	1.6025e-05	5.95837e-05	472	17	34	5	27	14	0	0	0	0	1	0	1	1	0	0	0	0	0
HAL1:Ift81	Ift81									chr5	122560745	122567260	HAL1	L1	LINE	NA	NA	NA	-	internal	0.570346	-1.76081	2.51814	-0.191818	-0.683937	8.6203	14.1888	0.0144539	0.0215911	473	18	11	26	11	23	1	3	0	22	29	29	0	15	1	0	11	2	0
B3:Grn	Grn			X	X					chr11	102418219	102432964	B3	B2	SINE	NA	NA	NA	+	promoter_tss	-1.22836	-6.84158	-6.84158	-3.81906	-6.84158	7.00376	22.7642	0.000374457	0.000954818	474	30	21	1	16	14	0	0	0	0	0	0	0	2	0	0	0	0	2
MT2B2:Aatf	Aatf			X	X					chr11	84511578	84512140	MT2B2	ERVL	LTR	NA	NA	NA	-	internal	-2.35446	3.37105	4.19614	3.33488	3.75728	9.37266	43.6479	2.73049e-08	2.1151e-07	475	0	9	0	1	1	14	15	22	23	24	37	7	25	31	26	60	10	2
ORR1F:Tex26	Tex26								X	chr5	149458913	149460820	ORR1F	ERVL-MaLR	LTR	NA	NA	NA	+	internal/promoter	1.42103	-2.19672	-3.00322	-2.46221	-3.4144	7.26544	29.2414	2.07913e-05	7.49882e-05	476	4	16	21	19	37	1	1	0	0	1	0	1	1	0	0	0	1	1
LTR41:Rnpep	Rnpep									chr1	135272478	135277388	LTR41	ERVL	LTR	NA	NA	NA	-	internal	0	3.2669	9.05794	7.14139	7.71682	9.06743	41.8245	6.39223e-08	4.4463e-07	477	0	0	0	0	0	1	0	1	7	4	119	15	19	3	44	23	5	0
ID_B1:Tex11	Tex11							X		chrX	100916650	100917900	NA	NA	NA	ID_B1	B4	SINE	-	promoter_tss	0.0311323	-0.947799	-4.30521	-3.77282	-4.73164	7.64407	38.4806	3.02082e-07	1.68786e-06	478	22	28	31	24	16	5	4	4	0	1	0	1	1	0	0	0	1	1
MTB-int:Calr3	Calr3									chr8	72438635	72440826	NA	NA	NA	MTB-int	ERVL-MaLR	LTR	-	promoter_tss	0.107355	-3.50132	-4.30195	-3.76482	-6.81599	7.46355	43.7193	2.64087e-08	2.06918e-07	479	24	26	21	26	29	1	1	0	0	1	0	1	1	0	0	0	0	0
ORR1E:Snx29	Snx29									chr16	11660627	11663081	NA	NA	NA	ORR1E	ERVL-MaLR	LTR	+	terminator	-0.304101	-0.942248	-4.24051	-6.81348	-1.12051	7.69489	13.1485	0.0220264	0.030958	480	29	21	23	32	1	4	5	4	1	0	0	0	0	0	0	0	13	0
B2_Mm2:Zfp936	Zfp936									chr7	43187553	43189042	NA	NA	NA	B2_Mm2	B2	SINE	+	internal	0	8.38131	0	5.10971	5.63163	8.09293	27.2863	5.01661e-05	0.000164144	481	0	0	0	0	0	27	16	34	0	0	0	8	0	0	8	9	0	0
L3:Stk38	Stk38									chr17	28977601	28979202	L3	CR1	LINE	NA	NA	NA	-	internal	-0.707298	2.20967	3.4262	3.37636	2.73958	8.89925	18.7322	0.00215585	0.00429277	482	3	7	8	0	0	6	5	15	4	14	40	11	43	14	16	15	17	0
B4A:Wdyhv1	Wdyhv1									chr15	58153704	58155138	NA	NA	NA	B4A	B4	SINE	+	terminator	1.36123	5.89886	4.72914	5.92906	8.25162	8.20008	23.2832	0.000297979	0.000782243	483	0	0	0	1	0	2	2	11	0	1	5	0	16	1	5	8	67	0
ID_B1:Psme4	Psme4					X		X	X	chr11	30856115	30856888	NA	NA	NA	ID_B1	B4	SINE	+	terminator	0.156912	-0.484913	0.508637	1.19296	0.0457946	8.90071	2.49949	0.776572	0.779239	484	26	22	35	21	18	7	5	5	3	19	11	55	1	3	4	14	15	3
PB1D7:Tfcp2l1	Tfcp2l1			X	X					chr1	118632393	118637598	NA	NA	NA	PB1D7	Alu	SINE	+	terminator	1.35953	0	5.89209	0	8.22664	7.94059	31.7859	6.5502e-06	2.71157e-05	485	0	0	0	1	0	0	0	0	0	12	0	0	0	0	30	22	38	2
B1F:Flt3l	Flt3l									chr7	45131740	45132068	B1F	Alu	SINE	NA	NA	NA	-	internal/terminator	0	0	8.63213	2.099	6.86677	8.35232	34.5511	1.84917e-06	8.49787e-06	486	0	0	0	0	0	0	0	0	24	18	45	0	0	1	0	3	27	0
B1_Mm:Htatsf1	Htatsf1									chrX	57056654	57056890	NA	NA	NA	B1_Mm	Alu	SINE	+	terminator	0	7.02086	8.42511	5.78944	4.91468	8.44056	47.6914	4.10623e-09	3.94236e-08	487	0	0	0	0	0	7	11	12	25	29	17	1	1	15	6	4	0	0
AmnSINE2:Dscr3	Dscr3									chr16	94501687	94502081	NA	NA	NA	AmnSINE2	Deu	SINE	-	internal	-2.5695	1.35357	0.644724	1.26977	1.67916	9.18685	9.57838	0.088102	0.101675	488	21	20	5	2	2	19	10	26	14	1	16	50	1	2	17	6	58	0
MTC:Pld1	Pld1							X	X	chr3	27950094	27952512	MTC	ERVL-MaLR	LTR	NA	NA	NA	+	promoter_tss	1.33464	-1.27787	-2.15014	-1.98395	-3.44701	7.3418	17.8857	0.00309308	0.00582981	489	20	1	21	31	23	2	2	0	1	1	0	1	2	0	0	0	1	2
MTB_Mm:A630095E13Rik	A630095E13Rik									chr9	36637901	36641915	NA	NA	NA	MTB_Mm	ERVL-MaLR	LTR	-	promoter_tss	-0.0305427	-4.36311	-4.27361	-3.73803	-6.78687	7.37104	45.9858	9.14294e-09	7.88916e-08	490	24	25	25	21	21	0	1	0	0	1	0	1	1	0	0	0	0	0
MIR3:Cdk12	Cdk12						X	X	X	chr11	98264307	98267751	NA	NA	NA	MIR3	MIR	SINE	+	internal	0	5.46823	8.59061	6.68151	6.33623	8.56787	36.4919	7.57159e-07	3.83265e-06	491	0	0	0	0	0	1	2	8	10	31	45	0	14	17	12	1	11	3
MT2B1:Atp13a3	Atp13a3									chr16	30387652	30405754	NA	NA	NA	MT2B1	ERVL	LTR	-	promoter_tss	0	8.50988	8.22348	5.80649	5.75134	8.86772	24.7895	0.000152995	0.000438201	492	0	0	0	0	0	11	21	60	30	20	10	0	0	18	0	2	12	0
Lx7:Terf1	Terf1				X					chr1	15819763	15821916	NA	NA	NA	Lx7	L1	LINE	+	terminator	2.0897	8.39512	8.13109	6.40583	7.11435	8.9848	48.4437	2.88309e-09	2.89016e-08	493	0	0	2	0	0	17	21	43	16	30	12	9	0	15	15	18	11	1
B4A:Ccndbp1	Ccndbp1							X	X	chr2	121014663	121016130	B4A	B4	SINE	NA	NA	NA	+	internal	-0.388779	-1.08603	-4.22736	-3.70745	-6.7622	7.44479	31.1228	8.85855e-06	3.53735e-05	494	14	34	21	22	8	5	4	2	1	0	0	1	1	0	0	0	0	2
MT2B1:Sgk1	Sgk1			X	X					chr10	21978982	21994965	MT2B1	ERVL	LTR	NA	NA	NA	+	promoter	0	0	3.76448	8.06157	3.64934	7.69438	31.6177	7.0721e-06	2.90995e-05	495	0	0	0	0	0	0	0	0	0	0	3	29	18	26	4	0	0	2
ORR1A4:Dnajc12	Dnajc12									chr10	63354009	63395784	ORR1A4	ERVL-MaLR	LTR	NA	NA	NA	+	promoter_tss	0	8.48896	0	5.84215	2.01024	8.10475	37.716	4.30277e-07	2.32782e-06	496	0	0	0	0	0	18	15	56	0	0	0	0	15	1	0	1	0	0
ORR1C1:Ston2	Ston2							X	X	chr12	91703236	91713926	ORR1C1	ERVL-MaLR	LTR	NA	NA	NA	-	terminator	4.41968	5.45978	1.48387	3.56002	0.431533	8.19236	61.3982	6.24664e-12	1.00586e-10	497	2	0	21	24	28	15	16	25	1	2	0	4	7	7	0	1	1	2
MTB:Dusp12	Dusp12									chr1	170881041	170884157	NA	NA	NA	MTB	ERVL-MaLR	LTR	-	promoter_tss	5.18362	-1.68977	1.72277	1.85999	4.41688	7.39355	31.9591	6.05315e-06	2.52626e-05	498	1	0	24	26	23	0	0	0	1	1	0	1	1	1	8	1	11	0
MT2_Mm:LOC102638435	LOC102638435									chr1	85178898	85272358	MT2_Mm	ERVL	LTR	NA	NA	NA	+	promoter_tss	-1.07033	5.36926	6.14398	5.1354	5.39637	9.26137	86.5029	3.64309e-17	1.96056e-15	499	1	1	1	0	0	12	13	29	22	17	46	11	13	32	21	29	22	0
PB1D11:4930451I11Rik	4930451I11Rik									chr7	126831027	126834208	NA	NA	NA	PB1D11	Alu	SINE	-	promoter_tss	3.22453	-3.61278	-0.193849	0.625597	-3.61278	7.09863	30.2584	1.31181e-05	4.99561e-05	500	0	5	16	21	35	0	0	0	1	1	0	1	3	1	0	0	0	0
Lx3A:Obox1	Obox1							X	X	chr7	15548546	15556150	Lx3A	L1	LINE	NA	NA	NA	+	promoter_tss	-1.13231	-3.40433	-2.777	-2.21941	-4.62045	7.20039	15.5707	0.00818299	0.0133499	501	11	36	19	7	3	1	1	0	1	2	0	2	3	1	0	0	1	2
X8_LINE:Adgrb3	Adgrb3									chr1	25098915	25101432	X8_LINE	CR1	LINE	NA	NA	NA	-	internal	-0.880799	-6.7317	-6.7317	-6.7317	-6.7317	6.98152	22.1165	0.000497561	0.00122004	502	15	32	17	18	0	0	0	0	0	0	0	0	0	0	0	0	0	0
B2_Mm2:Nkiras1	Nkiras1									chr14	18276806	18277843	NA	NA	NA	B2_Mm2	B2	SINE	+	internal	-2.55666	-2.09861	0.55517	-0.0366391	-1.36987	8.08991	3.99876	0.549594	0.556672	503	21	26	0	9	2	2	3	0	29	0	0	0	22	8	7	7	0	0
RMER4B:Gtf2ird1	Gtf2ird1									chr5	134366916	134376106	RMER4B	ERVK	LTR	NA	NA	NA	-	internal	-0.0617173	-2.17896	-1.62419	0.380459	0.346833	8.35424	8.02712	0.154747	0.168688	504	22	25	13	17	34	2	2	1	3	2	2	28	2	4	8	6	24	0
PB1:Afmid	Afmid									chr11	117835933	117836407	PB1	Alu	SINE	NA	NA	NA	+	internal	0	4.65034	2.41678	7.8788	0	7.59311	30.068	1.43007e-05	5.36604e-05	505	0	0	0	0	0	1	1	4	0	0	1	0	49	20	0	0	0	0
MT2B1:BC147527	BC147527						X	X	X	chr13	120303964	120307768	NA	NA	NA	MT2B1	ERVL	LTR	+	internal	2.62354	-4.2453	-4.2453	-4.2453	-4.2453	6.98552	33.079	3.62986e-06	1.59293e-05	506	1	7	31	26	15	0	0	0	0	0	0	0	0	0	0	0	0	3
RMER21A:Ino80	Ino80				X					chr2	119380121	119381909	RMER21A	ERV1	LTR	NA	NA	NA	-	internal	-2.45331	0.679199	-3.36385	2.0521	-0.44195	8.11351	26.2771	7.88424e-05	0.000244292	507	14	11	0	4	2	9	5	6	0	0	1	38	13	9	7	7	0	1
RLTR26_Mus:Actr8	Actr8									chr14	29986450	29986921	RLTR26_Mus	ERVK	LTR	NA	NA	NA	+	internal	2.55538	-0.825965	1.78312	4.67677	2.46874	8.09902	16.7915	0.00491277	0.0085942	508	2	2	2	19	16	1	0	0	0	6	1	32	15	21	18	1	0	0
MT2_Mm:Arih2	Arih2			X	X					chr9	108644994	108653572	NA	NA	NA	MT2_Mm	ERVL	LTR	-	promoter_tss	0	5.05083	8.1728	8.21209	7.25377	8.87209	41.2623	8.30481e-08	5.58663e-07	509	0	0	0	0	0	3	3	1	13	16	35	26	12	47	19	34	0	2
L1MEi:Zfp568	Zfp568			X	X					chr7	29985326	29987581	L1MEi	L1	LINE	NA	NA	NA	+	internal	-4.22673	0.61498	4.51913	2.10017	2.69166	8.69054	27.1442	5.3469e-05	0.000173838	510	8	0	0	0	0	3	2	1	6	19	76	14	4	2	17	25	0	2
B3:Smarcad1	Smarcad1				X					chr6	65067138	65067281	NA	NA	NA	B3	B2	SINE	+	terminator	0	5.48199	7.30868	6.36283	8.16456	8.49266	43.8256	2.51297e-08	1.99897e-07	511	0	0	0	0	0	2	5	3	12	16	4	0	9	16	34	51	11	1
PB1D9:Nf2	Nf2				X					chr11	4772638	4780577	PB1D9	Alu	SINE	NA	NA	NA	-	terminator	0	0	2.40161	7.85643	5.95357	7.72632	22.399	0.000439613	0.00109767	512	0	0	0	0	0	0	0	0	0	0	1	0	48	20	2	0	14	1
MT2_Mm:LOC102638435	LOC102638435									chr1	85266812	85272358	MT2_Mm	ERVL	LTR	NA	NA	NA	+	promoter_tss	0	7.94	8.44272	7.50868	7.19389	9.10012	70.4003	8.45901e-14	2.16233e-12	513	0	0	0	0	0	14	16	28	27	17	30	7	9	39	28	16	5	0
L1ME1:St3gal6	St3gal6								X	chr16	58503246	58507447	L1ME1	L1	LINE	NA	NA	NA	-	terminator	1.375	-0.237554	-2.04228	-1.44702	-2.53789	7.39445	18.6084	0.00227301	0.00448679	514	16	3	20	29	21	3	3	2	0	2	0	2	2	0	0	1	1	1
B1_Mur1:Trappc11	Trappc11									chr8	47495136	47496436	NA	NA	NA	B1_Mur1	Alu	SINE	-	promoter_tss	0	7.02974	0	5.89138	8.10236	8.23837	38.7365	2.68327e-07	1.52425e-06	515	0	0	0	0	0	7	5	20	0	0	0	11	0	4	23	12	44	0
ORR1A1:Iqub	Iqub									chr6	24462033	24474561	NA	NA	NA	ORR1A1	ERVL-MaLR	LTR	-	promoter_tss	0	4.32789	5.88854	6.11909	8.12678	8.14335	21.3978	0.000681197	0.00160121	516	0	0	0	0	0	2	2	0	11	0	0	9	0	10	33	44	15	0
MT2B2:Gm4567	Gm4567								X	chr7	22716073	22719550	NA	NA	NA	MT2B2	ERVL	LTR	-	internal/promoter_tss	5.47934	5.07861	5.85651	7.70907	6.64689	8.18428	12.8415	0.0249101	0.0343733	517	0	0	3	11	14	2	1	5	0	0	14	12	40	5	2	1	23	1
MLTR25A:Wasl	Wasl							X	X	chr6	24633210	24633836	MLTR25A	ERVK	LTR	NA	NA	NA	-	terminator	-3.31187	4.98403	2.0894	-0.258441	1.47813	8.02879	62.4996	3.69561e-12	6.09478e-11	518	2	2	0	0	0	23	14	37	3	1	5	1	1	0	4	5	0	2
B4:Ccdc162	Ccdc162									chr10	41648918	41654941	B4	B4	SINE	NA	NA	NA	-	terminator	3.17376	-0.292528	1.50634	3.11955	-0.662802	7.65614	27.4228	4.71851e-05	0.000156138	519	3	2	15	23	31	1	1	0	2	4	1	5	7	19	0	0	2	0
Lx:Prr32	Prr32								X	chrX	45040880	45090894	Lx	L1	LINE	NA	NA	NA	+	internal	-0.00407122	-3.35096	-3.26171	-1.61485	-4.56964	7.48074	25.4428	0.000114413	0.000338134	520	17	28	31	23	8	1	1	0	1	1	0	2	5	2	0	0	1	1
MTB_Mm:Angel2	Angel2							X	X	chr1	190925179	190926687	MTB_Mm	ERVL-MaLR	LTR	NA	NA	NA	+	promoter_tss	-0.395844	-0.686887	-4.153	-4.47932	-6.66519	7.42468	39.2943	2.07198e-07	1.22109e-06	521	22	23	14	15	19	5	5	4	0	1	0	0	1	0	0	0	0	2
MTA_Mm:Bbs7	Bbs7								X	chr3	36594560	36596691	NA	NA	NA	MTA_Mm	ERVL-MaLR	LTR	-	promoter_tss	-3.02312	-6.66522	-6.66522	-6.66522	-6.66522	6.61978	27.5586	4.43924e-05	0.000148096	522	22	23	5	1	1	0	0	0	0	0	0	0	0	0	0	0	0	1
ORR1C2:Usp26	Usp26								X	chrX	51800928	51813798	NA	NA	NA	ORR1C2	ERVL-MaLR	LTR	-	internal	0.594522	-0.418938	3.32	-5.01785	-5.01785	8.09266	43.0405	3.62591e-08	2.70913e-07	523	3	11	11	9	10	2	3	0	43	6	16	0	0	0	0	0	0	1
Plat_L3:Zranb2	Zranb2				X					chr3	157545122	157546074	NA	NA	NA	Plat_L3	CR1	LINE	+	internal/terminator	0	4.44381	5.21099	7.09199	8.10443	8.25193	46.3043	7.87457e-09	6.98714e-08	524	0	0	0	0	0	1	1	3	2	1	5	2	28	9	17	25	39	1
L2:Tiam1	Tiam1							X	X	chr16	89856015	89858598	L2	L2	LINE	NA	NA	NA	-	internal	-0.487538	-1.119	-2.65292	-6.65635	-4.53151	7.3718	21.0987	0.000776013	0.00179316	525	38	7	20	16	8	4	4	2	3	0	0	0	0	0	0	0	1	2
L1MB3:Atg13	Atg13									chr2	91695999	91705580	NA	NA	NA	L1MB3	L1	LINE	-	promoter_tss	0	5.42141	6.79314	8.38184	5.44647	8.3996	29.1109	2.20545e-05	7.89867e-05	526	0	0	0	0	0	2	3	5	1	19	3	3	22	80	14	1	0	0
L3:Selenbp1	Selenbp1	X								chr3	94944193	94944405	NA	NA	NA	L3	CR1	LINE	+	terminator	-1.69726	-1.69726	6.62786	4.75257	5.38077	8.42147	36.497	7.55387e-07	3.83265e-06	527	0	1	0	0	0	0	0	0	16	30	22	0	8	19	1	14	23	1
B4A:Gemin7	Gemin7									chr7	19565676	19573767	NA	NA	NA	B4A	B4	SINE	-	promoter_tss	3.37823	6.73441	6.28279	6.00167	3.35232	9.02603	28.7382	2.60972e-05	9.15417e-05	528	1	0	1	3	17	15	14	57	12	11	33	10	16	35	2	0	7	0
MLT1J-int:Mapk14	Mapk14							X		chr17	28728471	28728903	MLT1J-int	ERVL-MaLR	LTR	NA	NA	NA	+	internal	4.86727	7.49958	7.00751	7.70335	6.65648	8.64641	18.1892	0.00271845	0.00524951	529	0	0	2	15	1	8	11	25	5	10	13	0	49	11	4	13	13	1
B3A:Zar1l	Zar1l						X	X		chr5	150507203	150511766	NA	NA	NA	B3A	B2	SINE	-	internal	5.08726	5.17629	-1.69048	0.527456	-1.69048	7.47618	58.4799	2.50419e-11	3.41404e-10	530	1	0	26	15	27	8	7	12	0	0	0	1	0	0	0	0	0	2
ID_B1:Pdss2	Pdss2									chr10	43456592	43464624	NA	NA	NA	ID_B1	B4	SINE	+	terminator	0	8.41051	3.91553	5.6025	2.10366	8.06373	75.7814	6.39032e-15	2.04191e-13	531	0	0	0	0	0	15	14	56	1	1	1	2	4	8	0	0	1	0
B1F:Trmt5	Trmt5									chr12	73285275	73285903	NA	NA	NA	B1F	Alu	SINE	-	internal/promoter_tss	0	5.04592	8.07318	4.48664	0	7.77796	16.9162	0.00466143	0.0082107	532	0	0	0	0	0	1	2	5	0	55	0	0	0	7	0	0	0	0
B3:Erh	Erh				X					chr12	80642845	80643763	B3	B2	SINE	NA	NA	NA	-	internal	-4.90876	1.37767	3.00086	3.04039	3.15994	9.00621	59.4755	1.55994e-11	2.25274e-10	533	6	7	0	0	0	5	5	8	6	21	26	29	10	29	37	36	15	1
ID4_:Reep3	Reep3									chr10	67014164	67014901	ID4_	ID	SINE	NA	NA	NA	-	internal	0	2.33803	3.79907	7.68236	8.07429	8.3112	49.2238	1.99739e-09	2.08401e-08	534	0	0	0	0	0	0	0	1	0	0	3	9	28	22	10	16	49	0
B1F1:Pcbd2	Pcbd2			X		X			X	chr13	55751915	55775366	B1F1	Alu	SINE	NA	NA	NA	+	promoter	5.0385	2.85391	2.2252	3.51367	0.411297	7.26732	25.2066	0.000127099	0.000372375	535	1	0	13	7	47	2	2	1	1	1	1	3	4	3	0	0	1	3
B3:Ccdc6	Ccdc6							X	X	chr10	70175167	70182159	B3	B2	SINE	NA	NA	NA	+	internal	0.715564	1.09899	0.988119	3.05036	1.35822	8.05873	5.71879	0.334551	0.346408	536	7	3	1	12	11	5	2	4	0	0	11	10	42	0	7	8	4	2
MTA_Mm:Elovl7	Elovl7		X						X	chr13	108266608	108267189	MTA_Mm	ERVL-MaLR	LTR	NA	NA	NA	+	promoter_tss	1.73373	-5.00175	-5.00175	-1.92335	-5.00175	7.02122	28.7208	2.63028e-05	9.21047e-05	537	13	1	15	25	27	0	0	0	0	0	0	1	1	0	0	0	0	2
MTA_Mm-int:Trim30a	Trim30a							X	X	chr7	104430226	104432444	NA	NA	NA	MTA_Mm-int	ERVL-MaLR	LTR	-	promoter_tss	0.567891	-1.9072	-3.6432	-3.12353	-4.14718	7.3175	29.6708	1.71206e-05	6.31981e-05	538	21	11	18	29	20	2	2	0	1	0	0	1	1	0	1	0	0	2
B3:Cdk12	Cdk12						X	X	X	chr11	98267858	98277370	NA	NA	NA	B3	B2	SINE	+	terminator	0	6.85999	8.21147	6.022	6.70872	8.50177	26.5513	6.97436e-05	0.000218751	539	0	0	0	0	0	3	4	23	3	45	15	2	1	17	13	0	17	3
ORR1A2:Iqcg	Iqcg				X					chr16	33045701	33048702	NA	NA	NA	ORR1A2	ERVL-MaLR	LTR	-	promoter_tss	0	6.77457	8.23434	3.79703	5.6359	8.23379	39.7528	1.67495e-07	1.0164e-06	540	0	0	0	0	0	6	10	9	22	26	14	0	0	4	12	5	0	1
Lx7:Faiml	Faiml									chr9	99234122	99234298	Lx7	L1	LINE	NA	NA	NA	-	terminator	0	8.0674	8.28579	6.51666	4.04613	8.71151	46.6848	6.58727e-09	5.99339e-08	541	0	0	0	0	0	16	18	29	46	2	14	2	5	21	1	3	1	0
L3b:Nap1l4	Nap1l4									chr7	143524280	143524693	NA	NA	NA	L3b	CR1	LINE	-	internal	3.09509	2.6405	3.62172	3.93046	1.26852	8.4588	8.23136	0.143937	0.15766	542	0	5	12	30	24	5	7	5	12	16	2	18	0	36	2	0	6	0
ORR1A2:Clptm1	Clptm1									chr7	19646839	19651083	NA	NA	NA	ORR1A2	ERVL-MaLR	LTR	-	promoter_tss	0	3.26616	3.28769	7.94184	2.02444	7.59591	52.5222	4.21542e-10	4.87878e-09	543	0	0	0	0	0	1	0	1	0	0	2	25	16	27	0	1	0	0
PB1D10:Tada3	Tada3									chr6	113376064	113376891	NA	NA	NA	PB1D10	Alu	SINE	-	internal/promoter_tss	-3.0415	-6.60843	-1.51362	0.132995	-3.78979	7.42917	19.4023	0.00161708	0.00337786	544	7	36	0	2	5	0	0	0	0	6	1	12	7	10	0	2	0	0
B1_Mur4:Snapc3	Snapc3									chr4	83441969	83442752	NA	NA	NA	B1_Mur4	Alu	SINE	+	terminator	0	8.30631	3.4284	5.1989	0	7.92969	52.5186	4.22271e-10	4.87878e-09	545	0	0	0	0	0	14	17	47	1	1	0	1	1	9	0	0	0	0
PB1D11:Zfp451	Zfp451								X	chr1	33764569	33765843	PB1D11	Alu	SINE	NA	NA	NA	-	internal	-0.349262	-2.78736	-2.00345	-3.02321	-1.54728	7.45271	11.8568	0.0368029	0.0479987	546	19	24	19	4	24	1	1	1	1	2	2	1	2	0	6	0	4	1
MERV1_LTR:Sfxn1	Sfxn1	X			X					chr13	54089059	54091222	MERV1_LTR	ERV1	LTR	NA	NA	NA	+	internal	-0.145477	0.20087	1.78034	3.70615	2.32991	8.05735	11.5527	0.041459	0.0531226	547	5	2	0	9	0	2	1	1	0	9	3	18	28	13	21	8	0	2
B3A:Cyb561a3	Cyb561a3									chr19	10579074	10580462	B3A	B2	SINE	NA	NA	NA	+	internal/promoter	-5.24087	-6.60031	-6.60031	-1.17306	0.812204	7.66858	20.7149	0.000916924	0.00207195	548	21	22	0	1	0	0	0	0	0	0	0	10	0	0	13	2	32	0
MT2C_Mm:Tatdn3	Tatdn3									chr1	191061257	191067097	NA	NA	NA	MT2C_Mm	ERVL	LTR	-	promoter_tss	0	3.89232	6.59883	8.6144	6.38242	8.53192	36.4554	7.70005e-07	3.87847e-06	549	0	0	0	0	0	1	2	0	12	5	2	7	3	116	14	4	8	0
ORR1E:Ttll5	Ttll5									chr12	86045218	86053142	ORR1E	ERVL-MaLR	LTR	NA	NA	NA	+	internal	0.322596	-1.88343	-3.01961	-4.23726	-6.42362	7.37034	36.3519	8.0763e-07	4.0185e-06	550	19	19	30	21	15	2	2	1	1	1	0	0	1	0	0	0	0	0
RLTR28B:Wwox	Wwox									chr8	114638103	114679786	RLTR28B	ERVL	LTR	NA	NA	NA	+	promoter_tss	-0.638158	-3.27607	-3.187	-1.70484	-4.49467	7.24917	19.9105	0.00129899	0.00276712	551	33	10	16	16	6	1	1	0	1	1	0	2	4	2	0	0	1	0
B1_Mus1:Gpank1	Gpank1									chr17	35122460	35123052	B1_Mus1	Alu	SINE	NA	NA	NA	+	internal/promoter	0	4.48478	5.93304	7.55099	6.69271	7.97322	9.8142	0.0806743	0.0941124	552	0	0	0	0	0	0	0	6	0	0	15	0	50	3	0	1	25	0
MT2B1:Papd4	Papd4									chr13	93186476	93194917	NA	NA	NA	MT2B1	ERVL	LTR	-	internal	0	0	6.07625	0	7.98	7.80643	35.0889	1.44439e-06	6.83746e-06	553	0	0	0	0	0	0	0	0	0	12	2	0	0	0	45	16	20	0
RSINE1:9130011E15Rik	9130011E15Rik									chr19	45918806	45921616	RSINE1	B4	SINE	NA	NA	NA	-	terminator	5.06542	3.82145	4.90789	8.33807	6.14418	8.26388	22.919	0.000349817	0.000898713	554	0	0	0	16	5	1	1	1	2	3	1	3	20	79	15	0	7	0
IAPEz-int:Pkd1l2	Pkd1l2									chr8	116999983	117007185	NA	NA	NA	IAPEz-int	ERVK	LTR	-	promoter_tss	0	0	5.99044	8.07365	7.38412	8.32364	23.6269	0.000256042	0.000686246	555	0	0	0	0	0	0	0	0	6	3	4	36	0	38	0	1	41	0
ID4:Nrf1	Nrf1									chr6	30090304	30095339	ID4	ID	SINE	NA	NA	NA	+	internal	-0.875349	4.22664	5.45851	4.35186	4.47769	8.94421	54.4869	1.66441e-10	2.06285e-09	556	2	1	1	0	1	6	8	21	10	26	39	6	16	24	17	10	24	0
RSINE1:Kpna7	Kpna7								X	chr5	145008051	145009313	NA	NA	NA	RSINE1	B4	SINE	-	internal	0.206593	-6.49797	-3.98307	-3.44428	-6.49797	7.26115	43.591	2.80398e-08	2.14788e-07	557	18	22	20	24	21	0	0	0	0	1	0	1	1	0	0	0	0	1
PB1D7:Tfb2m	Tfb2m									chr1	179529354	179529529	NA	NA	NA	PB1D7	Alu	SINE	-	internal	-2.45028	5.00243	6.19411	4.93022	3.91408	8.95868	43.8051	2.53714e-08	2.00326e-07	558	1	1	0	0	0	10	9	23	16	6	71	10	21	16	1	19	6	0
L1MEi:Zfp568	Zfp568			X	X					chr7	29984228	29985259	NA	NA	NA	L1MEi	L1	LINE	+	internal	-1.08098	0.0487612	6.28283	4.08563	3.10864	8.48652	32.2177	5.37966e-06	2.26833e-05	559	2	0	0	1	0	1	0	0	4	11	87	16	5	2	9	7	0	2
MIRb:Tmem234	Tmem234				X					chr4	129601243	129602194	MIRb	MIR	SINE	NA	NA	NA	+	internal	0.38806	1.5378	4.61227	3.91936	6.28061	8.0326	22.4407	0.000431626	0.00108171	560	1	0	1	1	0	0	1	1	0	16	0	1	1	13	39	17	23	1
MTE2a:43892	43892									chr1	184822550	184830284	NA	NA	NA	MTE2a	ERVL-MaLR	LTR	-	promoter_tss	-3.17309	-6.57223	-2.29232	-3.50912	-6.57223	6.74933	26.2991	7.80711e-05	0.000242269	561	11	31	2	2	2	0	0	0	1	1	2	1	1	0	0	0	0	0
ID_B1:Flt3l	Flt3l									chr7	45131566	45132068	ID_B1	B4	SINE	NA	NA	NA	-	terminator	0	8.18061	6.95853	7.71012	8.03816	9.05557	59.5747	1.48804e-11	2.18923e-10	562	0	0	0	0	0	18	12	40	5	4	19	31	9	15	21	47	17	0
MT2C_Mm:Mrps6	Mrps6									chr16	92055323	92099593	MT2C_Mm	ERVL	LTR	NA	NA	NA	+	promoter_tss	0	7.35056	2.51581	3.05632	8.01244	8.15713	72.4342	3.1894e-14	8.81395e-13	563	0	0	0	0	0	8	7	25	0	1	0	1	1	0	20	30	29	0
B3:Sae1	Sae1				X					chr7	16320880	16330612	B3	B2	SINE	NA	NA	NA	-	terminator	0	6.52117	5.74391	6.99174	7.96818	8.38062	34.7152	1.71497e-06	7.95262e-06	564	0	0	0	0	0	3	4	16	0	10	1	5	9	24	31	11	33	1
MTC:Htra1	Htra1									chr7	130968077	130979300	MTC	ERVL-MaLR	LTR	NA	NA	NA	+	promoter_tss	2.12367	1.07968	-2.02429	0.181885	-2.44225	7.33956	22.0485	0.000512605	0.00125093	565	8	2	11	17	36	4	3	4	0	1	0	2	4	1	0	0	1	0
B3:2610305D13Rik	2610305D13Rik									chr4	147615406	147616179	NA	NA	NA	B3	B2	SINE	-	internal	-0.193838	-0.166317	-1.91884	-1.69438	-4.48847	7.71168	23.2397	0.000303742	0.000794312	566	20	22	22	14	15	6	7	6	2	3	0	2	3	3	0	0	1	0
ERVL-int:Ccdc57	Ccdc57							X		chr11	120915559	120919472	ERVL-int	ERVL	LTR	NA	NA	NA	-	terminator	0	3.12217	8.25185	3.65629	6.46806	8.07938	31.8978	6.22467e-06	2.59256e-05	567	0	0	0	0	0	0	0	2	0	41	26	2	1	0	6	19	4	1
B3:Cul5	Cul5			X	X					chr9	53658185	53658570	B3	B2	SINE	NA	NA	NA	-	internal	-0.99315	-1.33781	0.968833	0.757791	-0.876368	8.43421	12.4041	0.0296515	0.0397882	568	22	20	13	6	10	4	3	1	10	7	24	14	24	5	8	8	1	2
MIR3:Arntl	Arntl							X	X	chr7	113274753	113279456	NA	NA	NA	MIR3	MIR	SINE	+	internal	-0.691074	-2.69474	-3.14983	-6.56525	-6.56525	7.07177	28.6559	2.70838e-05	9.46776e-05	569	23	19	14	13	9	1	2	0	1	1	0	0	0	0	0	0	0	2
MTA_Mm:Lancl1	Lancl1									chr1	67021065	67024644	NA	NA	NA	MTA_Mm	ERVL-MaLR	LTR	-	promoter_tss	2.83541	-3.8373	-3.8373	-3.8373	-3.8373	6.86306	28.0804	3.51056e-05	0.000119453	570	6	0	16	18	30	0	0	0	0	0	0	0	0	0	0	0	0	0
MT2B1:Rbm8a	Rbm8a									chr3	96629363	96629909	MT2B1	ERVL	LTR	NA	NA	NA	+	promoter_tss	2.07134	8.20297	7.46842	5.61385	4.04632	8.40728	38.899	2.48865e-07	1.42957e-06	571	0	0	1	0	1	21	12	37	11	1	28	10	1	1	1	3	1	0
MT2C_Mm:Cul3	Cul3						X	X		chr1	80323056	80379760	NA	NA	NA	MT2C_Mm	ERVL	LTR	-	promoter_tss	0	8.39284	6.85947	3.55233	0	8.21964	59.5287	1.52092e-11	2.22163e-10	572	0	0	0	0	0	12	12	62	2	14	9	1	1	1	0	0	0	2
RLTR16B_MM:Prrc1	Prrc1				X					chr18	57374027	57374526	RLTR16B_MM	ERVK	LTR	NA	NA	NA	+	promoter_tss	0	4.21807	3.9805	5.2227	8.03098	7.8531	48.1275	3.34537e-09	3.31184e-08	573	0	0	0	0	0	1	2	1	2	1	0	1	2	8	18	55	13	1
B1_Mus1:Gm40447	Gm40447									chr12	75747364	75747869	B1_Mus1	Alu	SINE	NA	NA	NA	-	internal	6.63563	0	0	3.07119	7.98071	7.96294	47.902	3.71943e-09	3.63847e-08	574	0	0	9	23	31	0	0	0	0	0	0	1	1	0	12	33	31	0
MIR3:Mtif2	Mtif2									chr11	29526843	29529928	MIR3	MIR	SINE	NA	NA	NA	+	internal/promoter	-3.58948	-5.70854	2.27874	-5.70854	-2.91689	7.6965	19.7878	0.00136962	0.00289647	575	13	10	2	0	0	0	0	0	0	51	1	0	0	0	0	2	0	0
B1F:Kansl2	Kansl2									chr15	98520425	98521635	NA	NA	NA	B1F	Alu	SINE	-	internal	-2.45694	5.64603	3.90145	3.69113	5.5215	8.71754	26.5724	6.90865e-05	0.000217138	576	0	2	0	0	0	14	11	43	0	15	2	13	0	5	30	36	16	0
MTA_Mm:Trpc4	Trpc4					X			X	chr3	54276431	54279862	MTA_Mm	ERVL-MaLR	LTR	NA	NA	NA	+	promoter_tss	-2.38794	-6.53294	-3.10005	-2.93707	-4.38469	6.79005	14.3532	0.013515	0.0203821	577	19	22	9	1	0	0	0	0	1	1	0	1	2	0	0	0	1	2
MT2C_Mm:Uap1	Uap1									chr1	170166948	170169090	NA	NA	NA	MT2C_Mm	ERVL	LTR	-	promoter_tss	0	5.98254	6.70051	7.44699	7.97028	8.53831	54.9019	1.36743e-10	1.72617e-09	578	0	0	0	0	0	5	5	4	8	5	9	14	9	27	39	43	4	0
MTC:Nubpl	Nubpl									chr12	52232718	52271038	MTC	ERVL-MaLR	LTR	NA	NA	NA	+	promoter_tss	0.626094	-2.44577	-3.23081	-2.18914	2.19058	8.07025	34.3661	2.01303e-06	9.16847e-06	579	16	8	19	13	20	1	1	0	1	0	0	1	2	0	12	14	44	0
L3:Mpi	Mpi									chr9	57545403	57546393	NA	NA	NA	L3	CR1	LINE	-	internal	2.60707	-1.68678	-1.68678	-1.68678	6.25576	7.61563	25.5938	0.000106965	0.000319309	580	1	0	11	0	0	0	0	0	0	0	0	0	0	0	27	16	31	0
L2c:Cep19	Cep19									chr16	32103044	32103883	L2c	L2	LINE	NA	NA	NA	+	internal	2.83978	0.0417772	4.74884	5.21252	4.63479	8.39733	17.4128	0.00377987	0.00680443	581	2	0	6	11	7	1	0	0	9	1	23	45	1	2	21	11	11	0
L1Md_F2:Gm5373	Gm5373									chr8	71831977	71841649	NA	NA	NA	L1Md_F2	L1	LINE	-	internal	0	8.29938	5.06472	4.62488	0	7.96067	39.4646	1.9146e-07	1.13818e-06	582	0	0	0	0	0	15	11	53	0	5	2	5	0	1	0	0	0	0
L1MB2:Atf1	Atf1							X		chr15	100232315	100232732	L1MB2	L1	LINE	NA	NA	NA	+	promoter	0	7.39764	8.26079	7.54623	6.00136	8.78609	52.3142	4.65071e-10	5.34309e-09	583	0	0	0	0	0	9	11	20	9	29	29	9	9	38	3	16	2	1
Lx3A:Tex30	Tex30									chr1	44091591	44093263	NA	NA	NA	Lx3A	L1	LINE	-	internal	0.63058	5.23878	-2.94188	-2.94188	0.36486	7.76741	40.2222	1.34696e-07	8.50164e-07	584	2	1	0	7	0	17	14	39	0	0	0	0	0	0	2	1	0	0
MIR3:Bud31	Bud31				X					chr5	145140563	145141304	NA	NA	NA	MIR3	MIR	SINE	+	internal	4.1688	4.9186	8.6563	6.93488	7.3839	8.81831	27.4523	4.65637e-05	0.000154582	585	0	0	0	1	10	2	1	4	3	12	82	19	9	3	14	22	16	1
LTR33C:Cdk9	Cdk9						X			chr2	32712112	32712564	LTR33C	ERVL	LTR	NA	NA	NA	-	internal	-2.82148	0.665939	3.31543	1.5975	0.663651	8.33977	23.8261	0.000234468	0.000634243	586	1	12	2	0	0	3	3	5	12	27	26	15	0	9	9	2	4	1
ORR1A3:Aptx	Aptx				X					chr4	40697353	40701779	NA	NA	NA	ORR1A3	ERVL-MaLR	LTR	-	promoter_tss	0	0	6.16015	5.45793	7.87833	7.90973	38.4891	3.00892e-07	1.68582e-06	587	0	0	0	0	0	0	0	0	0	12	3	2	8	2	52	17	10	1
B1_Mur4:Echdc2	Echdc2			X	X					chr4	108174174	108175258	NA	NA	NA	B1_Mur4	Alu	SINE	+	internal	0	0	2.4209	7.22408	7.92671	8.05706	32.674	4.36799e-06	1.87658e-05	588	0	0	0	0	0	0	0	0	0	0	1	0	35	8	21	14	36	2
B1F:Rab3b	Rab3b								X	chr4	108939251	108940625	B1F	Alu	SINE	NA	NA	NA	+	promoter	3.27034	0.00109126	1.3076	2.22911	-1.21717	7.26962	20.6582	0.000939749	0.00210261	589	0	4	8	22	31	1	1	0	1	3	1	3	5	5	0	0	1	1
MTC:Syt1	Syt1									chr10	108691063	108692115	NA	NA	NA	MTC	ERVL-MaLR	LTR	-	promoter_tss	-2.89996	-4.00112	-6.50057	-6.50057	-6.50057	6.5882	21.7184	0.000592213	0.00142647	590	14	26	2	5	0	1	0	0	0	0	0	0	0	0	0	0	0	0
MTA_Mm:Fam179b	Fam179b									chr12	65004037	65006318	MTA_Mm	ERVL-MaLR	LTR	NA	NA	NA	+	promoter_tss	-0.51171	-6.4986	-6.4986	-2.91702	-6.4986	7.01594	35.0059	1.50058e-06	7.03826e-06	591	17	23	15	13	11	0	0	0	0	0	0	1	2	0	0	0	0	0
PB1D9:Tmtc1	Tmtc1							X	X	chr6	148334642	148335642	PB1D9	Alu	SINE	NA	NA	NA	-	terminator	-0.250959	-2.64453	-1.60559	-0.732369	-4.40522	7.5153	18.0108	0.00293288	0.00560012	592	19	21	17	5	25	1	2	0	2	3	1	4	6	5	0	0	1	2
MTC:Agtpbp1	Agtpbp1							X	X	chr13	59477138	59482160	NA	NA	NA	MTC	ERVL-MaLR	LTR	-	promoter_tss	-0.735036	-6.49053	-6.49053	-4.30188	-6.49053	6.90454	28.244	3.2612e-05	0.000111524	593	30	10	14	10	9	0	0	0	0	0	0	0	1	0	0	0	0	2
RLTR12C:Ash2l	Ash2l									chr8	25840075	25847578	NA	NA	NA	RLTR12C	ERVK	LTR	-	promoter_tss	0	3.81804	6.44721	7.63535	6.83023	8.09221	39.0062	2.36806e-07	1.37186e-06	594	0	0	0	0	0	1	1	1	4	0	16	17	26	11	18	16	4	0
ORR1A2:Pcnt	Pcnt				X					chr10	76412649	76415012	NA	NA	NA	ORR1A2	ERVL-MaLR	LTR	-	promoter_tss	0.138685	-3.16504	-3.9725	-3.43086	-4.38245	7.29465	27.8298	3.9296e-05	0.000132389	595	33	7	25	19	17	1	1	0	0	1	0	1	1	0	0	0	1	1
B4A:Gm1587	Gm1587							X	X	chr14	77795025	77796957	NA	NA	NA	B4A	B4	SINE	-	internal	2.394	1.56497	-1.70081	-2.01052	-4.23518	7.22037	32.306	5.16727e-06	2.1878e-05	596	5	3	26	16	19	5	5	2	1	0	0	1	0	0	0	0	0	2
MTD:Socs6	Socs6							X	X	chr18	88870918	88887208	NA	NA	NA	MTD	ERVL-MaLR	LTR	-	internal/promoter_tss	-1.64345	-4.54393	3.40488	-4.54393	-4.54393	7.57668	26.1087	8.50084e-05	0.000258694	597	5	5	2	2	0	0	0	0	0	48	3	0	0	0	0	0	0	2
B1_Mur1:Tmigd1	Tmigd1									chr11	76909465	76910046	B1_Mur1	Alu	SINE	NA	NA	NA	+	promoter_tss	0	4.22002	7.48569	6.90944	7.90635	8.45862	40.3331	1.27929e-07	8.17549e-07	599	0	0	0	0	0	1	2	1	9	21	7	8	0	28	22	23	28	0
ORR1A2:Rnf34	Rnf34									chr5	122823889	122861688	ORR1A2	ERVL-MaLR	LTR	NA	NA	NA	+	promoter_tss	0	6.30243	6.01103	8.25072	7.22177	8.54952	36.3074	8.24383e-07	4.0919e-06	600	0	0	0	0	0	5	6	7	3	9	1	20	1	71	22	19	8	0
B1_Mus1:Tnrc6b	Tnrc6b							X	X	chr15	80922258	80923457	B1_Mus1	Alu	SINE	NA	NA	NA	+	promoter	0	8.13258	6.86965	6.84765	5.22569	8.43058	46.9605	5.78791e-09	5.38012e-08	601	0	0	0	0	0	14	16	38	12	5	7	3	7	25	9	1	2	2
B3:Syncrip	Syncrip			X	X					chr9	88464783	88473170	NA	NA	NA	B3	B2	SINE	-	promoter_tss	0	2.33967	6.34673	7.81481	6.65751	8.08898	40.7357	1.06099e-07	6.97658e-07	602	0	0	0	0	0	0	0	1	0	9	9	12	24	29	5	8	16	2
MTB_Mm:Asb3	Asb3		X						X	chr11	31048054	31055457	MTB_Mm	ERVL-MaLR	LTR	NA	NA	NA	+	promoter_tss	-4.4259	-6.46489	-6.46489	-3.37346	-6.46489	6.52492	20.4738	0.00101805	0.00225314	603	13	26	0	0	2	0	0	0	0	0	0	1	1	0	0	0	0	2
MT2B:Kng1	Kng1				X					chr16	23066903	23067694	MT2B	ERVL	LTR	NA	NA	NA	+	promoter_tss	0	2.5229	5.57523	7.7728	3.28667	7.63769	23.7561	0.000241838	0.000653315	604	0	0	0	0	0	1	0	0	5	0	5	39	0	17	2	1	0	1
ORR1D1:9430038I01Rik	9430038I01Rik							X	X	chr7	137387701	137388918	NA	NA	NA	ORR1D1	ERVL-MaLR	LTR	-	internal	-1.84283	0.0787488	-4.03972	0.2828	-1.86664	7.76944	6.36095	0.272664	0.285508	605	20	19	13	1	0	10	5	5	0	0	1	25	0	0	3	5	0	2
RMER12B:Snurf	Snurf									chr7	59999413	60071884	NA	NA	NA	RMER12B	ERVK	LTR	-	internal	-1.3174	-6.46034	-6.46034	-6.46034	-2.11656	6.86442	13.8452	0.016623	0.0242468	606	20	19	13	0	8	0	0	0	0	0	0	0	0	0	0	0	5	0
ID_B1:Arhgap26	Arhgap26						X	X		chr18	38676805	38775497	NA	NA	NA	ID_B1	B4	SINE	+	terminator	-2.69988	-6.45969	-6.45969	-6.45969	-6.45969	6.54872	18.7281	0.00215957	0.00429277	607	21	18	1	7	0	0	0	0	0	0	0	0	0	0	0	0	0	2
MT2B1:Zfp352	Zfp352					X	X	X	X	chr4	90218975	90223582	MT2B1	ERVL	LTR	NA	NA	NA	+	promoter_tss	0	8.15769	0	0	0	7.65704	43.6698	2.70269e-08	2.10955e-07	608	0	0	0	0	0	15	13	42	0	0	0	0	0	0	0	0	0	4
B3:Tbp	Tbp									chr17	15501357	15502964	B3	B2	SINE	NA	NA	NA	+	internal/promoter_tss	-1.34764	2.31282	-0.437573	0.510265	-0.0335999	8.36959	15.395	0.00880153	0.0141614	609	15	10	9	3	1	18	11	39	2	2	5	16	2	2	10	1	6	0
B1F2:Gata1	Gata1									chrX	7963241	7976479	NA	NA	NA	B1F2	Alu	SINE	-	internal/promoter_tss	0	4.50738	8.46082	5.46009	6.80702	8.38697	59.3773	1.63447e-11	2.32118e-10	610	0	0	0	0	0	2	1	2	14	9	58	3	6	3	20	12	5	0
MT2C_Mm:Gm3139	Gm3139									chr5	94526435	94534821	MT2C_Mm	ERVL	LTR	NA	NA	NA	+	promoter_tss	0	4.76873	5.93408	7.98577	7.65154	8.43034	55.0473	1.27641e-10	1.62128e-09	612	0	0	0	0	0	2	2	2	2	6	5	14	15	46	34	32	3	0
B1_Mur1:Nrg4	Nrg4							X	X	chr9	55221408	55226615	B1_Mur1	Alu	SINE	L1MB3	L1	LINE	-	internal/terminator	4.88702	2.54597	1.67177	1.37228	2.90223	7.11385	16.2556	0.00615098	0.0103871	613	0	1	26	11	22	2	1	1	1	0	1	1	1	0	8	0	0	2
MTD:Papola	Papola									chr12	105790413	105799650	MTD	ERVL-MaLR	LTR	NA	NA	NA	+	promoter_tss	0	4.92612	7.9097	7.76085	7.29542	8.63875	57.5571	3.8819e-11	5.12161e-10	614	0	0	0	0	0	2	1	4	4	10	42	13	23	26	15	19	15	0
B3:Tsacc	Tsacc									chr3	88282984	88286000	NA	NA	NA	B3	B2	SINE	-	internal	0	5.00908	0	0	7.84396	7.57291	29.4545	1.88806e-05	6.90712e-05	615	0	0	0	0	0	1	1	6	0	0	0	0	0	0	12	0	49	0
ID4:Haus4	Haus4								X	chr14	54550036	54550641	NA	NA	NA	ID4	ID	SINE	-	internal	-0.915632	-6.42758	-6.42758	-6.42758	-6.42758	6.80229	28.1916	3.3391e-05	0.000113998	616	13	25	9	16	3	0	0	0	0	0	0	0	0	0	0	0	0	1
Lx3B:Prex2	Prex2									chr1	11284167	11285056	Lx3B	L1	LINE	NA	NA	NA	+	promoter_tss	-1.21557	-6.42691	-6.42691	-3.40457	-6.42691	6.78502	23.7349	0.000244113	0.000658591	617	14	24	14	6	2	0	0	0	0	0	0	0	2	0	0	0	0	0
ORR1D1:Gigyf2	Gigyf2				X		X			chr1	87323885	87334269	ORR1D1	ERVL-MaLR	LTR	NA	NA	NA	+	promoter_tss	0	8.07959	6.31615	7.46083	2.01968	8.38929	39.9412	1.53472e-07	9.34081e-07	618	0	0	0	0	0	11	18	37	8	5	3	0	16	39	0	1	0	2
MT2B:Tial1	Tial1									chr7	128455032	128466740	NA	NA	NA	MT2B	ERVL	LTR	-	internal	0	2.46431	8.01824	4.27874	0	7.61053	18.9364	0.00197529	0.00401537	619	0	0	0	0	0	0	1	0	46	0	3	0	0	6	0	0	0	0
Lx5c:Larp1b	Larp1b				X					chr3	41014283	41024444	Lx5c	L1	LINE	NA	NA	NA	+	promoter_tss	-1.05998	-6.42299	-3.01568	-2.84688	-4.32287	6.92767	24.0741	0.000210105	0.000575188	620	20	18	11	6	8	0	0	0	1	1	0	1	2	0	0	0	1	1
B3:Trim61	Trim61							X	X	chr8	65017405	65018457	B3	B2	SINE	NA	NA	NA	-	internal	-1.3193	-6.42232	-6.42232	-6.42232	-6.42232	6.71344	30.3937	1.23369e-05	4.73339e-05	621	21	17	6	13	2	0	0	0	0	0	0	0	0	0	0	0	0	2
MamGypLTR1b:Rbm19	Rbm19				X					chr5	120140597	120141550	NA	NA	NA	MamGypLTR1b	Gypsy	LTR	+	internal	0	5.79675	6.9369	7.92729	6.78748	8.39393	67.5602	3.29596e-13	6.80831e-12	622	0	0	0	0	0	3	3	7	4	8	15	11	19	42	15	11	9	1
ID_B1:Tmem120b	Tmem120b									chr5	123098293	123099836	ID_B1	B4	SINE	NA	NA	NA	+	internal/promoter	2.11342	4.46976	4.20913	4.66079	4.91464	8.88751	12.0304	0.0343734	0.045263	623	1	2	10	8	2	13	14	11	3	25	1	30	0	22	33	40	6	0
B3A:Lepr	Lepr									chr4	101792070	101794952	NA	NA	NA	B3A	B2	SINE	+	terminator	0.904874	0.0959623	-3.13536	-3.46085	-2.766	7.32393	30.8828	9.8796e-06	3.90034e-05	624	12	10	22	21	15	4	4	4	0	1	0	0	1	0	1	0	1	0
HAL1:Sbf2	Sbf2							X	X	chr7	110317023	110320672	HAL1	L1	LINE	NA	NA	NA	-	internal	-2.18672	-2.2176	2.27793	0.782193	-5.58798	7.94175	18.183	0.00272555	0.00525565	625	5	16	2	3	1	1	1	0	0	46	2	15	0	6	0	0	0	2
MTE2b:Gmpr	Gmpr									chr13	45520175	45520851	MTE2b	ERVL-MaLR	LTR	NA	NA	NA	+	internal	2.95615	0.20916	-3.61438	-1.33705	1.54814	7.11686	12.9514	0.0238381	0.0331175	626	0	5	30	11	17	1	1	1	0	0	0	1	0	0	0	0	9	0
MIRb:2310022A10Rik	2310022A10Rik									chr7	27556534	27560551	MIRb	MIR	SINE	NA	NA	NA	+	internal/promoter_tss	-0.339113	0.825188	5.12263	5.93637	1.0782	7.80155	18.8752	0.00202778	0.00410168	627	0	1	0	1	0	1	0	0	12	0	12	40	0	9	2	0	0	0
B3:Atp5s	Atp5s									chr12	69725554	69737950	B3	B2	SINE	NA	NA	NA	+	internal/promoter_tss	0	7.90724	7.13017	8.116	6.9323	8.88582	30.4445	1.20557e-05	4.64291e-05	628	0	0	0	0	0	16	18	21	21	4	2	23	0	59	23	10	7	0
ID_B1:Cnep1r1	Cnep1r1									chr8	88130401	88130735	NA	NA	NA	ID_B1	B4	SINE	+	terminator	1.35812	8.01056	6.90803	7.52688	7.04755	8.73651	13.5341	0.0188558	0.0270788	629	0	0	0	1	0	22	9	29	0	8	20	43	0	0	14	32	0	0
L3b:Nap1l4	Nap1l4									chr7	143524716	143527165	L3b	CR1	LINE	NA	NA	NA	-	internal	3.1769	3.33616	4.2458	3.49076	0.891244	8.36615	12.6473	0.0269181	0.0367474	630	0	4	9	27	21	7	7	9	12	19	8	17	0	13	1	0	4	0
ID_B1:Sacm1l	Sacm1l									chr9	123587602	123590800	ID_B1	B4	SINE	NA	NA	NA	+	internal	3.53654	5.17613	5.53476	4.93096	5.20773	9.0541	17.4943	0.00365175	0.00663217	631	1	1	15	13	11	11	12	24	13	12	31	1	42	4	37	9	18	0
MT2C_Mm:Gm3286	Gm3286									chr5	95510875	95521400	MT2C_Mm	ERVL	LTR	NA	NA	NA	+	promoter_tss	0	7.12477	7.28386	8.13122	6.84532	8.72942	41.3046	8.143e-08	5.49585e-07	632	0	0	0	0	0	5	6	24	6	12	16	11	10	65	12	2	19	0
MTB_Mm:Jam2	Jam2									chr16	84795022	84801569	MTB_Mm	ERVL-MaLR	LTR	NA	NA	NA	+	promoter_tss	4.07264	0.871154	0.0654978	0.605948	0.881085	6.94065	24.5002	0.000173957	0.00049068	633	1	1	21	8	28	1	1	0	0	1	0	1	1	0	2	1	0	0
MTB:Serpinb12	Serpinb12								X	chr1	106953298	106953690	MTB	ERVL-MaLR	LTR	NA	NA	NA	+	promoter_tss	2.677	-3.85404	-3.85404	-0.831757	-3.85404	6.84009	27.387	4.79496e-05	0.000158156	634	1	5	24	9	24	0	0	0	0	0	0	0	2	0	0	0	0	1
MIRc:Mest	Mest							X	X	chr6	30733613	30740669	MIRc	MIR	SINE	NA	NA	NA	+	promoter	-2.54632	-6.39215	-6.39215	-6.39215	-6.39215	6.5313	16.943	0.00460924	0.00812577	635	9	28	7	1	0	0	0	0	0	0	0	0	0	0	0	0	0	2
RLTR31D_MM:Gucy2e	Gucy2e				X					chr11	69228199	69228361	RLTR31D_MM	ERVK	LTR	NA	NA	NA	-	internal	0	4.77459	6.72695	0	7.81911	7.9266	40.6682	1.0948e-07	7.13013e-07	636	0	0	0	0	0	2	2	2	16	0	5	0	0	0	23	24	23	1
B1F:Cnga1	Cnga1									chr5	72619132	72637664	NA	NA	NA	B1F	Alu	SINE	-	promoter_tss	-0.845016	-1.34707	-2.9738	-6.38854	-4.35923	7.06736	21.1806	0.000748816	0.00174015	637	14	23	17	2	9	3	3	1	1	1	0	0	0	0	0	1	0	0
MT2B2:Tmem56	Tmem56									chr3	121235764	121252684	NA	NA	NA	MT2B2	ERVL	LTR	-	promoter_tss	0	5.13711	7.06918	7.87238	7.4035	8.49509	34.9732	1.52327e-06	7.12833e-06	638	0	0	0	0	0	1	4	3	12	11	4	0	29	43	37	10	9	0
RMER19B:Mau2	Mau2									chr8	70023697	70025827	RMER19B	ERVK	LTR	NA	NA	NA	-	internal	0.817147	5.09342	5.93227	5.08521	6.16151	8.6585	22.0947	0.000502329	0.00122878	639	1	0	0	1	2	9	6	10	12	4	28	25	0	1	15	39	19	0
ID_B1:Zfp644	Zfp644				X		X			chr5	106690877	106695136	ID_B1	B4	SINE	NA	NA	NA	-	internal	4.79751	1.64793	-1.68921	-1.68921	-1.68921	6.77629	35.5021	1.19446e-06	5.74746e-06	640	1	0	15	24	17	1	1	0	0	0	0	0	0	0	0	0	0	2
B3A:Raph1	Raph1									chr1	60483340	60493537	B3A	B2	SINE	NA	NA	NA	-	terminator	-2.1765	0.87548	1.02556	3.65934	2.74461	8.21659	27.9701	3.68921e-05	0.000125323	641	0	8	1	0	1	2	2	4	1	5	2	9	18	45	3	15	19	0
MIRc:Ralgds	Ralgds									chr2	28548765	28548954	MIRc	MIR	SINE	NA	NA	NA	+	internal	-0.326789	-1.68915	4.52211	6.21432	5.55577	8.2492	42.7318	4.18765e-08	3.06944e-07	643	1	0	0	0	1	0	0	0	0	10	6	13	14	44	7	14	23	0
B1_Mus2:LOC108167371	LOC108167371									chr13	66589285	66590113	NA	NA	NA	B1_Mus2	Alu	SINE	+	internal	0	3.75734	5.56324	7.50687	7.71855	8.20424	43.8789	2.45108e-08	1.95799e-07	644	0	0	0	0	0	1	0	2	0	1	10	22	17	9	22	17	25	0
MTA_Mm:Tbl1xr1	Tbl1xr1								X	chr3	22114613	22148941	MTA_Mm	ERVL-MaLR	LTR	NA	NA	NA	+	promoter_tss	6.45019	3.32991	5.927	2.98365	2.11397	7.16132	27.8499	3.89423e-05	0.000131632	645	0	0	11	18	26	1	1	0	9	1	2	0	1	1	0	0	1	1
RMER19B:Lsm1	Lsm1							X		chr8	25793792	25796952	NA	NA	NA	RMER19B	ERVK	LTR	+	internal/terminator	-0.783091	-1.58038	-3.83255	-3.29552	-3.45465	7.0666	17.9823	0.00296866	0.00565192	646	18	18	11	3	15	2	2	2	0	1	0	1	1	0	0	1	1	1
L3:Tdrd9	Tdrd9									chr12	112036527	112039303	NA	NA	NA	L3	CR1	LINE	+	internal/terminator	2.11409	5.62709	3.24489	7.49614	6.02547	7.73956	15.09	0.00998466	0.0157308	647	0	0	2	0	0	3	1	8	0	0	2	40	0	3	13	0	7	0
B1F2:Sar1a	Sar1a				X					chr10	61680413	61684060	NA	NA	NA	B1F2	Alu	SINE	+	internal	1.36342	4.94131	7.99859	6.91009	6.03055	8.24396	40.0847	1.43576e-07	8.83082e-07	648	0	0	0	0	1	1	3	3	21	17	15	0	12	25	5	4	10	1
L3:Wee1	Wee1									chr7	110124661	110125806	NA	NA	NA	L3	CR1	LINE	+	internal	1.40677	7.89487	6.80225	7.2664	4.87563	8.39422	16.8411	0.00481132	0.00844562	649	0	0	1	0	0	18	13	24	17	0	5	21	0	21	10	0	0	0
ORR1A2:Hint3	Hint3		X							chr10	30629401	30629531	NA	NA	NA	ORR1A2	ERVL-MaLR	LTR	-	promoter_tss	0	0	0	6.08107	7.80472	7.69619	26.2285	8.0574e-05	0.000248903	650	0	0	0	0	0	0	0	0	0	0	0	10	0	8	1	21	40	1
B4:Supt16	Supt16			X	X					chr14	52176725	52176948	NA	NA	NA	B4	B4	SINE	-	internal	2.03846	0	6.25166	7.37009	1.99647	7.51071	26.153	8.33415e-05	0.000254378	651	0	0	0	0	2	0	0	0	2	0	16	6	34	6	1	0	0	2
L2c:Atg10	Atg10			X						chr13	90937390	91022569	NA	NA	NA	L2c	L2	LINE	-	internal	1.42519	-2.94643	0.464655	1.24387	4.79752	7.61615	41.1404	8.78959e-08	5.87409e-07	652	1	2	9	2	1	0	0	0	1	1	0	1	1	3	22	17	26	1
MTA_Mm:Ski	Ski								X	chr4	155160956	155180416	NA	NA	NA	MTA_Mm	ERVL-MaLR	LTR	-	promoter_tss	3.12414	-3.30789	-3.30789	-3.30789	-3.30789	6.72201	35.5292	1.17966e-06	5.70767e-06	653	3	1	14	16	24	0	0	0	0	0	0	0	0	0	0	0	0	1
Lx4A:Fbxo15	Fbxo15			X	X					chr18	84965060	84965430	Lx4A	L1	LINE	NA	NA	NA	+	internal	0	0	4.87395	7.2298	7.06678	7.78151	15.5776	0.0081596	0.0133384	654	0	0	0	0	0	0	0	0	0	0	7	0	42	0	29	7	8	2
PB1D7:Amn1	Amn1									chr6	149185124	149188235	NA	NA	NA	PB1D7	Alu	SINE	-	promoter_tss	2.08182	3.52321	4.39077	5.54264	4.57056	7.88121	9.63391	0.0862982	0.0997875	655	1	0	2	2	4	3	3	2	8	0	6	0	42	0	9	16	1	0
BGLII:Gm7995	Gm7995								X	chr14	42285120	42310210	BGLII	ERVK	LTR	NA	NA	NA	+	promoter_tss	-0.0105181	-1.76609	-2.91969	-3.25508	-6.31081	7.21474	25.5851	0.000107381	0.000319641	656	11	24	25	14	9	2	2	1	0	2	0	1	1	0	0	0	0	1
MTA_Mm:Adhfe1	Adhfe1								X	chr1	9565720	9566780	MTA_Mm	ERVL-MaLR	LTR	NA	NA	NA	+	promoter_tss	-1.44396	-6.30966	-6.30966	-3.28713	-6.30966	6.68677	18.5556	0.0023249	0.00456716	657	13	22	13	1	3	0	0	0	0	0	0	0	2	0	0	0	0	1
B3:2610305D13Rik	2610305D13Rik									chr4	147616218	147618416	B3	B2	SINE	NA	NA	NA	-	internal	-0.877558	-1.32121	-2.36482	-1.11821	-3.37138	7.26255	11.1474	0.0485347	0.0607578	658	17	18	14	7	5	2	3	2	1	2	0	3	3	4	0	0	2	0
ORR1C2-int:Usp26	Usp26								X	chrX	51800928	51815611	NA	NA	NA	ORR1C2-int	ERVL-MaLR	LTR	-	internal/promoter_tss	-0.739698	-0.690019	-3.79399	-3.26212	-4.22127	7.15812	24.2544	0.000193983	0.000537451	659	19	16	11	11	7	4	3	4	0	1	0	1	1	0	0	0	1	1
LFSINE_Vert:43892	43892									chr17	33703208	33709744	LFSINE_Vert	tRNA	SINE	NA	NA	NA	-	internal	0.126211	0.333988	1.88359	-1.3767	-5.98467	8.1839	18.5942	0.00228693	0.00450123	660	19	9	12	14	17	6	9	2	42	1	1	1	1	5	0	0	0	0
PB1D9:Nlrp4a	Nlrp4a							X	X	chr7	26437917	26444149	PB1D9	Alu	SINE	NA	NA	NA	+	internal	0.317461	-6.08628	-3.57022	-3.02925	-6.08628	7.0609	35.2849	1.31996e-06	6.27747e-06	661	16	14	13	16	24	0	0	0	0	1	0	1	1	0	0	0	0	2
RLTR19-int:LOC108167440	LOC108167440									chr7	75770237	75780624	RLTR19-int	ERVK	LTR	NA	NA	NA	-	terminator	-0.295537	6.20951	5.66803	5.1934	3.82396	8.48169	17.8577	0.00313011	0.00588876	662	0	1	1	0	0	15	13	29	27	0	5	12	0	22	9	0	5	0
MTB_Mm:Efcab6	Efcab6							X	X	chr15	83899792	83901221	NA	NA	NA	MTB_Mm	ERVL-MaLR	LTR	-	promoter_tss	1.74302	-4.66904	-4.66904	-4.66904	-4.66904	6.7936	35.0633	1.4615e-06	6.87071e-06	663	9	2	16	18	19	0	0	0	0	0	0	0	0	0	0	0	0	2
PB1D9:Ggps1	Ggps1							X		chr13	14052393	14053909	PB1D9	Alu	SINE	NA	NA	NA	-	internal/terminator	-0.896634	1.022	-1.31484	2.74778	1.66936	7.88568	11.8577	0.0367907	0.0479987	664	2	9	3	4	1	6	3	2	1	0	1	39	0	2	8	16	3	1
MIR:Dab2	Dab2								X	chr15	6390428	6416805	MIR	MIR	SINE	NA	NA	NA	+	promoter	0.147031	-1.73226	-1.16126	-0.712198	-2.18821	7.59505	8.54728	0.128542	0.142631	665	7	27	18	26	9	2	2	1	2	4	1	3	6	4	3	0	2	1
Lx3A:Tex30	Tex30									chr1	44093317	44099847	Lx3A	L1	LINE	NA	NA	NA	-	internal	0.447378	3.89929	-4.05717	-4.05717	-4.05717	7.64733	29.4506	1.89144e-05	6.90713e-05	666	3	4	0	14	0	15	11	34	0	0	0	0	0	0	0	0	0	0
ORR1A2:Pin4	Pin4									chrX	102125558	102127016	ORR1A2	ERVL-MaLR	LTR	NA	NA	NA	+	promoter_tss	0	5.6333	6.23764	6.156	7.68028	8.05297	44.0868	2.2241e-08	1.79066e-07	667	0	0	0	0	0	2	2	8	2	3	12	4	9	7	22	7	31	0
B1_Mur2:Rbm33	Rbm33									chr5	28309590	28331110	B1_Mur2	Alu	SINE	NA	NA	NA	+	internal	0	5.37549	7.77259	6.73855	6.34962	8.17766	28.1098	3.46425e-05	0.000118073	668	0	0	0	0	0	1	3	6	4	37	4	1	2	31	14	2	9	0
MTB_Mm-int:Arhgap15	Arhgap15								X	chr2	44054875	44063761	MTB_Mm-int	ERVL-MaLR	LTR	NA	NA	NA	+	promoter_tss	-0.0960406	-0.0042783	-2.85234	-2.68577	-1.5159	7.55661	9.52885	0.0897403	0.103391	670	8	26	12	21	12	5	4	9	1	1	0	1	2	0	0	0	7	1
MTE2a:Daw1	Daw1								X	chr1	83197018	83197220	MTE2a	ERVL-MaLR	LTR	NA	NA	NA	+	promoter_tss	-0.104737	-6.26801	-6.26801	-3.24609	-6.26801	6.98696	30.9126	9.74699e-06	3.85543e-05	671	13	21	18	19	7	0	0	0	0	0	0	0	2	0	0	0	0	1
MTB:Ezh2	Ezh2									chr6	47577667	47580828	NA	NA	NA	MTB	ERVL-MaLR	LTR	-	promoter_tss	-3.70713	-6.26365	-6.26365	-6.26365	-6.26365	6.40329	21.4566	0.000663948	0.00156968	672	19	15	2	0	1	0	0	0	0	0	0	0	0	0	0	0	0	0
B3:Hs3st5	Hs3st5							X	X	chr10	36702034	36735353	NA	NA	NA	B3	B2	SINE	+	terminator	-1.28364	-1.49608	-3.74828	-3.24303	-4.16167	6.9209	16.3151	0.00599968	0.0101652	673	19	15	9	2	8	2	2	2	0	1	0	0	2	0	0	0	1	2
MTA_Mm:Rnf38	Rnf38					X		X	X	chr4	44138831	44139471	NA	NA	NA	MTA_Mm	ERVL-MaLR	LTR	-	promoter_tss	1.71155	1.20014	-4.67321	-1.62087	-4.67321	7.16329	32.5348	4.65482e-06	1.99144e-05	674	7	4	16	13	23	5	4	4	0	0	0	1	1	0	0	0	0	3
MT2_Mm:Sp110	Sp110									chr1	85596109	85603834	NA	NA	NA	MT2_Mm	ERVL	LTR	-	promoter_tss	-0.659443	-0.593519	-0.628948	0.691509	0.410457	8.13929	3.75861	0.584667	0.591025	675	26	8	7	22	1	4	5	2	3	6	1	6	11	19	14	9	9	0
B4:Mon1a	Mon1a			X	X					chr9	107892374	107898671	B4	B4	SINE	NA	NA	NA	+	promoter_tss	0	6.49093	8.07671	7.6855	7.20268	8.76724	46.6984	6.54522e-09	5.99339e-08	676	0	0	0	0	0	7	7	6	23	7	28	11	12	38	32	18	1	2
RLTR41A2:Igsf23	Igsf23							X	X	chr7	19944913	19953550	NA	NA	NA	RLTR41A2	ERV1	LTR	-	promoter_tss	0.753266	0.329799	-2.24999	-3.46162	-5.64728	7.31132	34.3664	2.01276e-06	9.16847e-06	677	11	11	22	16	14	5	5	4	1	1	0	0	1	0	0	0	0	2
B3:Spats1	Spats1				X					chr17	45446083	45449434	B3	B2	SINE	NA	NA	NA	-	terminator	0	2.45366	5.98542	5.94782	7.66902	7.83641	20.7082	0.000919592	0.00207339	678	0	0	0	0	0	0	1	0	11	0	1	5	0	13	12	2	41	1
Lx8:Zfp942	Zfp942									chr17	21941850	21953887	Lx8	L1	LINE	NA	NA	NA	-	internal/terminator	0.609869	0.284538	0.93944	2.15066	-1.34504	7.82185	5.10003	0.403794	0.414122	679	8	6	12	15	3	2	3	4	0	10	3	0	40	0	3	1	0	0
MTA_Mm:P4ha1	P4ha1									chr10	59331520	59337053	MTA_Mm	ERVL-MaLR	LTR	NA	NA	NA	+	promoter_tss	0.522685	-3.38129	-3.2959	-1.60591	-5.81722	7.06967	20.4808	0.00101495	0.00225116	680	24	1	9	21	21	0	1	0	0	1	0	1	2	2	0	0	0	0
MTA_Mm:Tcstv3	Tcstv3						X	X		chr13	120315504	120316855	MTA_Mm	ERVL-MaLR	LTR	MT2B1	ERVL	LTR	+	internal/promoter_tss	0.372659	-5.98989	-5.98989	-2.40513	-5.98989	7.02132	32.7404	4.23763e-06	1.82826e-05	681	13	15	17	21	13	0	0	0	0	0	0	1	2	0	0	0	0	2
MTEb:Krt88	Krt88									chr15	101446587	101450437	MTEb	ERVL-MaLR	LTR	NA	NA	NA	+	promoter_tss	0.664484	-5.70027	-3.17772	-2.62566	-5.70027	6.97767	24.5368	0.000171155	0.000483441	682	21	2	18	18	15	0	0	0	0	1	0	1	1	0	0	0	0	0
MT2C_Mm:Gm16513	Gm16513			X						chr5	95182715	95190936	MT2C_Mm	ERVL	LTR	NA	NA	NA	+	promoter_tss	0	6.06619	7.06263	7.71848	7.18225	8.45403	46.2994	7.89256e-09	6.98714e-08	683	0	0	0	0	0	5	5	5	5	11	13	15	12	34	23	26	1	1
L1M2:Tmem68	Tmem68									chr4	3567474	3569363	L1M2	L1	LINE	NA	NA	NA	-	internal	-4.04882	-0.170972	3.82392	1.27164	0.7678	7.79237	33.0097	3.74677e-06	1.63721e-05	684	6	1	0	0	0	1	2	0	29	8	10	1	1	10	3	5	1	0
B1_Mur1:Pdcd2l	Pdcd2l									chr7	34186442	34186790	NA	NA	NA	B1_Mur1	Alu	SINE	-	internal	-3.39795	-5.50419	-1.72268	1.68582	0.618536	7.5886	18.7749	0.00211674	0.0042397	685	17	3	2	0	0	0	0	0	0	0	3	5	34	1	2	15	5	0
B3:Smim14	Smim14							X	X	chr5	65468501	65477325	NA	NA	NA	B3	B2	SINE	-	promoter_tss	-3.37218	-1.98095	-6.22597	-3.97684	-6.22597	6.58012	21.0259	0.000800991	0.0018467	686	12	21	0	1	3	2	1	1	0	0	0	1	0	0	0	0	0	2
MTB_Mm:Cacnb2	Cacnb2							X		chr2	14863297	14874769	MTB_Mm	ERVL-MaLR	LTR	NA	NA	NA	+	promoter_tss	-0.331916	-2.32274	-2.8052	-2.63881	-6.22521	7.05944	17.5179	0.0036155	0.006573	687	13	20	10	2	25	2	1	0	1	1	0	1	2	0	0	0	0	1
ORR1A0:Lepr	Lepr									chr4	101788964	101789262	ORR1A0	ERVL-MaLR	LTR	NA	NA	NA	+	promoter_tss	1.2923	3.74878	-0.643871	-0.0665417	-1.15657	7.74368	36.0953	9.09028e-07	4.50112e-06	688	6	1	6	15	4	15	13	24	1	1	0	2	2	0	0	1	1	0
PB1D11:Snapc3	Snapc3									chr4	83460359	83461030	NA	NA	NA	PB1D11	Alu	SINE	+	internal	0	6.54721	7.75562	4.06673	0	7.78682	33.5966	2.8643e-06	1.26786e-05	689	0	0	0	0	0	3	6	14	4	34	7	0	0	5	0	0	0	0
MTA_Mm:Pdss2	Pdss2									chr10	43295859	43298798	MTA_Mm	ERVL-MaLR	LTR	NA	NA	NA	+	promoter_tss	0.0933305	-6.21634	-6.21634	-3.19445	-6.21634	7.02476	31.974	6.01203e-06	2.51423e-05	690	25	8	18	17	14	0	0	0	0	0	0	0	2	0	0	0	0	0
MTC:Kcnn2	Kcnn2									chr18	45577570	45592005	MTC	ERVL-MaLR	LTR	NA	NA	NA	+	promoter_tss	-0.690114	-6.21326	-2.78461	-2.62041	-6.21326	6.88204	19.0486	0.00188246	0.00384964	692	29	4	2	9	18	0	0	0	1	1	0	1	2	0	0	0	0	0
ORR1A1:Kif18a	Kif18a									chr2	109312451	109317874	ORR1A1	ERVL-MaLR	LTR	NA	NA	NA	+	promoter_tss	-2.21021	4.11494	2.83662	-0.623364	-1.57697	7.7612	37.3405	5.11812e-07	2.73278e-06	693	3	2	1	0	0	15	15	18	14	0	3	0	1	1	0	1	0	0
Lx3C:Gm13103	Gm13103									chr4	143847715	143850679	Lx3C	L1	LINE	NA	NA	NA	+	internal	2.72414	1.9822	2.54998	-0.0313584	-1.51103	7.41407	21.3144	0.000706413	0.00165477	694	3	2	14	22	14	3	3	5	1	10	4	1	2	0	0	0	1	0
MIRc:Zfp280d	Zfp280d									chr9	72339048	72339615	NA	NA	NA	MIRc	MIR	SINE	+	terminator	-0.177509	2.19949	3.58515	2.29984	2.27618	8.38132	8.85062	0.115173	0.129057	695	1	7	2	6	2	8	6	5	38	0	6	16	1	7	1	6	18	0
B1_Mur4:Senp8	Senp8								X	chr9	59737868	59739939	NA	NA	NA	B1_Mur4	Alu	SINE	-	internal	0.629637	-5.70869	-3.19226	-2.6506	-5.70869	6.96914	32.2879	5.21009e-06	2.20137e-05	696	13	10	19	10	21	0	0	0	0	1	0	1	1	0	0	0	0	1
LTR16A2:Akap8l	Akap8l									chr17	32335623	32335957	NA	NA	NA	LTR16A2	ERVL	LTR	-	internal	0.382883	5.20137	5.91519	3.62802	5.95858	8.45284	25.7127	0.000101443	0.00030418	697	1	0	1	0	1	4	8	17	1	37	2	1	1	10	14	24	23	0
MT2_Mm:Pla2g16	Pla2g16									chr19	7551407	7574936	MT2_Mm	ERVL	LTR	NA	NA	NA	+	promoter_tss	0	3.81734	6.06798	6.61414	7.64097	7.99212	40.5236	1.17095e-07	7.54227e-07	698	0	0	0	0	0	1	1	1	4	0	11	15	7	3	23	30	12	0
MLTR14:Tmem56	Tmem56									chr3	121235764	121247001	NA	NA	NA	MLTR14	ERV1	LTR	-	internal	0	0	5.15334	7.23578	4.3906	7.32603	23.4195	0.000280592	0.000744181	699	0	0	0	0	0	0	0	0	1	1	6	1	35	7	7	0	0	0
ID_B1:Cdadc1	Cdadc1									chr14	59585153	59586038	ID_B1	B4	SINE	NA	NA	NA	-	internal	0	0	0	7.49149	4.99511	7.3665	21.3495	0.000695692	0.0016334	700	0	0	0	0	0	0	0	0	0	0	0	0	30	24	4	0	5	0
Lx8:Zfp942	Zfp942									chr17	21933113	21941725	NA	NA	NA	Lx8	L1	LINE	-	internal	-2.83432	-1.793	1.09541	2.20976	-2.91272	7.46622	14.1326	0.0147884	0.0219625	701	6	7	1	0	1	0	0	2	0	8	6	0	38	1	1	0	0	0
ORR1A2-int:Cit	Cit			X						chr5	115997853	116000856	NA	NA	NA	ORR1A2-int	ERVL-MaLR	LTR	+	terminator	1.09638	-1.85452	-2.67058	-2.12327	0.451902	7.21364	12.7022	0.0263351	0.0360718	702	14	2	10	18	21	1	1	0	0	1	0	1	1	0	12	5	0	1
RLTR10B2:BC051019	BC051019									chr7	109716487	109720958	NA	NA	NA	RLTR10B2	ERVK	LTR	-	promoter_tss	-3.68026	-6.18583	-6.18583	-6.18583	-6.18583	6.37233	24.2389	0.000195322	0.000539775	703	7	25	0	2	1	0	0	0	0	0	0	0	0	0	0	0	0	0
B1F2:Uchl3	Uchl3									chr14	101674258	101690571	B1F2	Alu	SINE	NA	NA	NA	+	internal	-3.2905	-0.538504	-2.77	-6.1833	-4.16079	6.8461	23.61	0.000257957	0.000690475	704	10	22	2	2	0	4	4	3	1	1	0	0	0	0	1	0	0	0
MT2C_Mm:Gm7792	Gm7792									chr5	93843855	93852074	MT2C_Mm	ERVL	LTR	NA	NA	NA	+	promoter_tss	0	5.53652	7.34609	7.60115	6.68994	8.33513	38.8167	2.58536e-07	1.48097e-06	705	0	0	0	0	0	4	4	2	9	6	21	17	11	27	4	30	1	0
L1M2:Tmem68	Tmem68									chr4	3564257	3567280	NA	NA	NA	L1M2	L1	LINE	-	internal/promoter_tss	-2.44164	0.891053	5.29552	3.76306	1.73138	7.75758	13.2578	0.0210787	0.0297881	706	2	0	0	0	0	0	2	0	30	9	2	0	0	24	6	0	0	0
MTD-int:Akap17b	Akap17b						X	X	X	chrX	36618733	36633204	NA	NA	NA	MTD-int	ERVL-MaLR	LTR	-	promoter_tss	-0.0880157	0.717189	-3.66458	-3.12987	-6.17742	7.54297	37.4987	4.75743e-07	2.56025e-06	707	18	14	15	19	8	9	8	10	0	1	0	1	1	0	0	0	0	3
RLTR31B2:Clvs2	Clvs2								X	chr10	33595426	33595743	RLTR31B2	ERVK	LTR	NA	NA	NA	-	terminator	-1.86894	-2.84996	-1.54945	-0.630348	-4.06655	7.06499	11.5105	0.0421462	0.0538681	708	18	14	2	0	10	1	1	0	1	3	1	3	5	5	0	0	1	1
MIRb:Pgap2	Pgap2									chr7	102223490	102226270	MIRb	MIR	SINE	NA	NA	NA	+	internal/promoter	-1.7049	-2.56843	1.50409	1.25721	-0.599822	8.13943	7.23504	0.203739	0.218025	709	8	19	6	3	2	1	1	0	28	0	6	0	36	6	14	0	0	0
B4A:Adtrp	Adtrp			X						chr13	41811731	41814214	B4A	B4	SINE	NA	NA	NA	-	terminator	-2.45801	-2.45801	-2.45801	-2.45801	5.15302	7.29711	34.2204	2.1521e-06	9.71533e-06	710	0	2	0	0	0	0	0	0	0	0	0	0	0	0	6	12	36	1
B3:Taf1d	Taf1d				X					chr9	15306283	15306872	NA	NA	NA	B3	B2	SINE	+	internal	-0.618994	3.01261	3.3433	2.64579	0.212719	8.47113	22.7531	0.000376287	0.000958291	711	3	6	3	2	3	10	15	14	14	22	8	0	24	15	6	2	0	1
B1_Mur2:Anapc1	Anapc1								X	chr2	128669059	128669649	NA	NA	NA	B1_Mur2	Alu	SINE	-	internal	0	0	7.60911	5.22648	2.75161	7.44233	14.0936	0.0150255	0.0222822	712	0	0	0	0	0	0	0	0	0	39	1	0	0	12	2	0	0	1
MT2B2:Hexb	Hexb			X	X					chr13	97194267	97199162	NA	NA	NA	MT2B2	ERVL	LTR	-	promoter_tss	0	2.44144	6.38746	7.67543	6.54179	8.01592	33.2771	3.31543e-06	1.46122e-05	713	0	0	0	0	0	0	1	0	4	11	2	0	24	39	11	13	6	2
MER34A:Gm40447	Gm40447									chr12	75746041	75747252	MER34A	ERV1	LTR	B1_Mus1	Alu	SINE	-	internal/terminator	6.0202	0	0	0	7.59522	7.59128	40.5201	1.17283e-07	7.54227e-07	714	0	0	5	13	23	0	0	0	0	0	0	0	0	0	14	16	27	0
B1_Mur1:Deaf1	Deaf1				X					chr7	141301689	141307486	NA	NA	NA	B1_Mur1	Alu	SINE	-	internal	0	0	5.69339	3.09332	7.61148	7.54187	29.9416	1.51441e-05	5.64112e-05	715	0	0	0	0	0	0	0	0	1	1	10	1	1	0	1	10	41	1
L2a:Txndc16	Txndc16							X	X	chr14	45213524	45218995	L2a	L2	LINE	NA	NA	NA	-	internal	3.31818	0.389897	-2.94674	-2.94674	-2.94674	6.69879	30.4277	1.21484e-05	4.66981e-05	716	1	2	13	10	25	1	1	0	0	0	0	0	0	0	0	0	0	2
L1MD2:Rnf180	Rnf180								X	chr13	105246698	105249610	L1MD2	L1	LINE	NA	NA	NA	-	internal	0.280518	-1.22298	-2.63255	-2.94093	-3.89869	7.17855	22.9543	0.000344418	0.000887072	717	16	12	14	9	25	2	2	2	0	1	1	1	1	0	0	0	1	1
RLTR20C1_MM:Yes1	Yes1								X	chr5	32659111	32660751	RLTR20C1_MM	ERVK	LTR	NA	NA	NA	+	internal	0.56323	-0.298648	-1.4119	0.289229	-2.04392	7.54628	4.14264	0.529068	0.536412	718	13	10	15	14	19	5	2	2	2	0	2	15	0	0	4	0	0	1
ORR1F:Bmp6	Bmp6							X	X	chr13	38346587	38357733	NA	NA	NA	ORR1F	ERVL-MaLR	LTR	+	terminator	2.04295	7.82065	2.55981	0	0	7.44163	48.2896	3.09989e-09	3.09233e-08	719	0	0	0	0	2	12	11	32	1	0	0	0	0	0	0	0	0	2
L1MA9:Pex2	Pex2				X					chr3	5562732	5563164	L1MA9	L1	LINE	NA	NA	NA	-	internal	0	5.7597	7.91178	5.51137	7.2741	8.30539	31.4026	7.79964e-06	3.18368e-05	720	0	0	0	0	0	3	2	8	0	27	27	4	7	1	30	20	3	1
ID4:Homer1	Homer1							X	X	chr13	93356079	93386344	NA	NA	NA	ID4	ID	SINE	+	internal	-1.1401	-0.593251	-3.57962	-3.88314	-6.1325	6.96498	17.2183	0.0041039	0.00732327	721	17	14	10	9	0	4	4	2	1	0	0	1	0	0	0	0	0	2
RLTR20D:Ranbp17	Ranbp17									chr11	33470125	33474886	RLTR20D	ERVK	LTR	NA	NA	NA	-	terminator	-0.537927	-0.940384	0.240363	-1.42925	-2.37949	7.55062	8.47451	0.131951	0.145309	722	19	12	18	5	6	3	3	2	9	3	5	2	3	2	3	0	1	0
MT2_Mm:AA792892	AA792892									chr5	94377448	94381345	MT2_Mm	ERVL	LTR	NA	NA	NA	+	promoter_tss	2.90729	3.86602	2.11054	-3.30749	-3.30749	7.59977	24.6616	0.000161935	0.000459941	723	3	1	6	14	27	11	12	9	8	0	0	0	0	0	0	0	0	0
B4A:Tbccd1	Tbccd1									chr16	22842107	22856754	NA	NA	NA	B4A	B4	SINE	-	promoter_tss	-1.24341	-3.31626	-3.31626	4.01865	2.22376	7.38698	29.2623	2.05953e-05	7.44125e-05	724	1	3	1	0	1	0	0	0	0	0	0	15	17	12	15	1	0	0
L1MD2:Rnf180	Rnf180								X	chr13	105181675	105246662	NA	NA	NA	L1MD2	L1	LINE	-	internal	0.409382	-2.50226	-2.47274	-2.76735	-3.72026	7.05048	20.1251	0.00118395	0.00257846	725	18	7	12	8	27	1	1	0	0	1	1	1	1	0	0	0	1	1
Lx7:Aig1	Aig1									chr10	13690639	13692245	NA	NA	NA	Lx7	L1	LINE	-	promoter_tss	2.17748	-4.05709	-4.05709	-4.05709	-4.05709	6.66901	26.6782	6.58895e-05	0.000208905	726	3	4	12	18	17	0	0	0	0	0	0	0	0	0	0	0	0	0
ORR1A2:Tlk2	Tlk2							X		chr11	105173708	105184211	ORR1A2	ERVL-MaLR	LTR	NA	NA	NA	+	promoter_tss	-1.69776	4.95093	6.03477	4.21149	-1.69776	7.94889	28.3835	3.06247e-05	0.000105611	727	0	1	0	0	0	6	8	9	35	1	5	0	2	17	0	0	0	1
ORR1A0:Spi1	Spi1									chr2	91105883	91113254	ORR1A0	ERVL-MaLR	LTR	NA	NA	NA	+	promoter_tss	0	0	2.41008	7.51681	7.10358	7.82301	25.5907	0.000107113	0.000319309	728	0	0	0	0	0	0	0	0	0	0	1	27	1	21	36	0	9	0
PB1D7:Farsb	Farsb									chr1	78463333	78465010	NA	NA	NA	PB1D7	Alu	SINE	-	internal	-1.68699	3.60636	5.85429	0.410129	3.45191	7.55559	18.5033	0.00237748	0.00464813	729	1	0	0	0	0	2	3	4	0	38	0	0	0	1	8	4	0	0
ORR1A1:Nav1	Nav1									chr1	135443831	135448229	NA	NA	NA	ORR1A1	ERVL-MaLR	LTR	-	promoter_tss	0	5.54245	3.4236	5.20293	7.53935	7.64207	36.5729	7.2942e-07	3.71061e-06	730	0	0	0	0	0	2	3	6	1	1	0	1	1	9	6	9	36	0
MT2_Mm:Slc16a6	Slc16a6									chr11	109463548	109466275	NA	NA	NA	MT2_Mm	ERVL	LTR	-	promoter_tss	0	3.81975	7.80165	4.60913	6.63134	7.91012	36.4745	7.6327e-07	3.85404e-06	731	0	0	0	0	0	1	1	1	31	1	13	1	1	5	5	6	17	0
MT2B1:Rb1cc1	Rb1cc1				X					chr1	6206270	6227939	MT2B1	ERVL	LTR	NA	NA	NA	+	promoter_tss	0	7.29906	7.6618	6.76112	0	8.22932	35.2439	1.34505e-06	6.38195e-06	732	0	0	0	0	0	6	12	20	15	20	6	0	2	33	0	0	0	1
MTA_Mm:Zc3h6	Zc3h6								X	chr2	129014162	129014335	MTA_Mm	ERVL-MaLR	LTR	NA	NA	NA	+	promoter_tss	1.20159	-1.66982	-1.58506	-1.41806	-5.00227	6.93577	18.1895	0.00271807	0.00524951	733	13	1	12	13	21	1	1	0	1	1	0	1	2	0	0	0	0	1
CR1_Mam:Srsf10	Srsf10							X		chr4	135863202	135867125	NA	NA	NA	CR1_Mam	CR1	LINE	+	terminator	0	5.6852	7.60927	7.47372	5.51969	8.23713	19.7427	0.00139658	0.00295041	734	0	0	0	0	0	2	1	10	0	30	12	28	0	19	1	1	10	1
MTB-int:Ncald	Ncald								X	chr15	37372221	37376591	NA	NA	NA	MTB-int	ERVL-MaLR	LTR	-	promoter_tss	-0.0658432	-2.75669	-3.57121	-3.02491	-4.07112	7.00665	17.7989	0.00320935	0.00602121	735	11	19	15	23	2	1	1	0	0	1	0	1	1	0	1	0	0	1
ORR1A3:Ppp2r5c	Ppp2r5c							X	X	chr12	110440003	110447971	ORR1A3	ERVL-MaLR	LTR	NA	NA	NA	+	promoter_tss	0	0	0	7.68151	3.96646	7.40746	38.6775	2.75755e-07	1.55779e-06	736	0	0	0	0	0	0	0	0	0	0	0	8	13	41	2	3	0	2
Lx5b:Cldn34c1	Cldn34c1									chrX	123117569	123142609	Lx5b	L1	LINE	NA	NA	NA	+	internal	-1.73443	-6.0879	-6.0879	-6.0879	-6.0879	6.48781	18.6989	0.00218679	0.00434035	737	14	16	6	6	0	0	0	0	0	0	0	0	0	0	0	0	0	0
RMER19B:Nlgn1	Nlgn1							X		chr3	25440077	25453253	NA	NA	NA	RMER19B	ERVK	LTR	-	promoter_tss	-2.27143	-6.08292	-6.08292	-6.08292	-6.08292	6.42424	21.9499	0.000535203	0.00130141	738	20	10	5	1	2	0	0	0	0	0	0	0	0	0	0	0	0	1
MIRc:Olfm1	Olfm1								X	chr2	28210290	28212531	MIRc	MIR	SINE	NA	NA	NA	+	promoter	-1.007	-1.53356	-1.18399	-0.442802	-3.18214	7.25821	6.46065	0.263939	0.277366	739	20	10	1	19	1	2	2	1	2	3	1	3	5	6	0	1	1	1
B1_Mur1:Mtf2	Mtf2				X					chr5	108065965	108067459	NA	NA	NA	B1_Mur1	Alu	SINE	+	internal	-3.55462	-1.53578	-2.71425	-3.0244	-2.08095	6.76386	12.4504	0.0291106	0.0391395	740	21	9	1	0	2	2	2	1	1	0	1	1	1	0	1	4	0	1
B3A:Snapc3	Snapc3									chr4	83454148	83465964	NA	NA	NA	B3A	B2	SINE	+	internal	0	7.64359	6.93368	0	2.80241	7.79832	30.7834	1.03361e-05	4.07271e-05	742	0	0	0	0	0	12	13	22	19	0	5	0	0	0	0	2	0	0
MERV1_LTR:Gm16381	Gm16381									chr12	87644659	87647383	NA	NA	NA	MERV1_LTR	ERV1	LTR	-	internal	0	7.6435	5.98531	0	0	7.55232	30.7668	1.04147e-05	4.08794e-05	743	0	0	0	0	0	12	13	22	11	0	1	0	0	0	0	0	0	0
B1F2:Tada2a	Tada2a									chr11	84090085	84090548	B1F2	Alu	SINE	NA	NA	NA	-	terminator	0	0	7.67326	0	5.43496	7.47145	25.3038	0.000121717	0.000357117	744	0	0	0	0	0	0	0	0	35	0	4	0	0	0	7	1	5	0
MT2B2:Eva1a	Eva1a									chr6	82035781	82071054	MT2B2	ERVL	LTR	NA	NA	NA	+	promoter_tss	0	5.05556	5.77678	7.52307	6.64829	7.96913	27.8439	3.90483e-05	0.000131772	745	0	0	0	0	0	3	3	1	7	1	3	22	3	26	25	10	0	0
MIRb:Ddx50	Ddx50									chr10	62647201	62647533	NA	NA	NA	MIRb	MIR	SINE	-	internal/promoter_tss	0	7.51313	5.9325	6.39326	5.16638	7.92384	20.6647	0.000937139	0.00209907	746	0	0	0	0	0	13	15	13	6	5	1	11	0	12	0	12	0	0
LTR86B1:Tbc1d1	Tbc1d1							X	X	chr5	64333591	64335277	LTR86B1	ERVL	LTR	NA	NA	NA	+	internal	-0.940894	2.18757	2.6317	2.15357	0.372402	8.48338	11.4649	0.0429034	0.0546992	747	2	12	3	5	2	9	15	9	16	17	8	1	22	20	0	14	0	2
B4:Cyp39a1	Cyp39a1							X	X	chr17	43685276	43687846	NA	NA	NA	B4	B4	SINE	+	internal	3.26543	-2.93612	-2.93612	-2.93612	-2.93612	6.60204	25.1334	0.000131306	0.00038142	748	3	0	21	10	14	0	0	0	0	0	0	0	0	0	0	0	0	2
MT2_Mm:Dhtkd1	Dhtkd1								X	chr2	5924138	5924677	NA	NA	NA	MT2_Mm	ERVL	LTR	-	promoter_tss	3.36208	6.50385	5.0107	7.55368	6.90927	8.17012	16.4826	0.00559319	0.0095636	749	0	0	0	1	5	8	6	6	6	0	0	24	0	28	24	7	8	1
ID_B1:Rbm7	Rbm7									chr9	48494181	48494282	NA	NA	NA	ID_B1	B4	SINE	-	internal	0.221803	0.573809	0.811171	2.77121	-1.95743	7.8527	20.8658	0.000858729	0.00196632	750	9	3	3	2	15	3	4	2	2	6	2	13	10	32	0	2	0	0
L3:Yipf2	Yipf2									chr9	21591514	21591899	NA	NA	NA	L3	CR1	LINE	-	internal	0	4.42959	7.6256	0	4.18753	7.43063	29.7558	1.64736e-05	6.10458e-05	751	0	0	0	0	0	1	1	3	1	31	10	0	0	0	6	0	0	0
PB1D9:Klhl15	Klhl15									chrX	94251625	94252414	PB1D9	Alu	SINE	NA	NA	NA	+	internal	0	4.66518	7.9912	4.89199	2.13846	7.74834	42.216	5.32621e-08	3.7689e-07	752	0	0	0	0	0	1	1	4	1	18	40	2	4	2	0	0	1	0
B2_Mm1a:B4galnt3	B4galnt3									chr6	120227860	120231513	B2_Mm1a	B2	SINE	NA	NA	NA	-	terminator	0	4.17035	4.61134	4.2139	7.50356	7.49087	49.4165	1.82411e-09	1.9328e-08	753	0	0	0	0	0	1	1	2	2	1	2	1	2	2	7	23	24	0
RLTR11B:Gtsf1l	Gtsf1l								X	chr2	163087721	163089538	NA	NA	NA	RLTR11B	ERVK	LTR	-	promoter_tss	0	5.15494	7.63952	6.03415	7.18112	8.16627	20.8186	0.000876534	0.00199612	754	0	0	0	0	0	2	3	3	34	1	3	0	1	20	2	4	32	1
ORR1A2:Klhl32	Klhl32								X	chr4	24662251	24682054	ORR1A2	ERVL-MaLR	LTR	NA	NA	NA	-	terminator	3.75669	-2.45905	-2.45905	-2.45905	-2.45905	6.59496	15.7275	0.00766669	0.0126032	755	0	2	26	0	19	0	0	0	0	0	0	0	0	0	0	0	0	1
MTA_Mm:Gm8787	Gm8787									chrX	79355237	79357949	NA	NA	NA	MTA_Mm	ERVL-MaLR	LTR	-	promoter_tss	-1.50392	-2.2286	-3.52674	-3.8556	-6.04248	6.66238	20.0177	0.00124019	0.00267249	757	10	19	4	8	2	1	1	1	0	1	0	0	1	0	0	0	0	0
B1_Mm:Ptrhd1	Ptrhd1									chr12	4234697	4236362	B1_Mm	Alu	SINE	NA	NA	NA	+	promoter	0	3.26662	6.72568	7.06399	7.14271	8.02453	32.5245	4.67678e-06	1.99666e-05	758	0	0	0	0	0	1	0	1	1	3	21	5	28	4	9	33	5	0
MamRep605:2210013O21Rik	2210013O21Rik									chrX	153725841	153741039	NA	NA	NA	MamRep605	LTR?	LTR?	+	terminator	-0.710319	-6.0376	-6.0376	-6.0376	-6.0376	6.64988	23.487	0.000272361	0.00072429	759	16	13	14	6	4	0	0	0	0	0	0	0	0	0	0	0	0	0
L1M4:Mllt10	Mllt10								X	chr2	18092834	18101457	L1M4	L1	LINE	NA	NA	NA	+	internal	-0.250317	-0.509993	1.02632	-1.25559	-0.519953	7.90312	3.43332	0.633501	0.638272	760	17	12	1	22	12	3	5	2	3	24	0	1	1	6	12	1	2	1
ID_B1:Aamdc	Aamdc									chr7	97569774	97575587	NA	NA	NA	ID_B1	B4	SINE	-	internal/promoter_tss	0	0	0	0	7.44102	7.182	35.4393	1.22946e-06	5.88817e-06	761	0	0	0	0	0	0	0	0	0	0	0	0	0	0	25	15	15	0
MTC:Skap1	Skap1									chr11	96483899	96489822	MTC	ERVL-MaLR	LTR	NA	NA	NA	+	promoter_tss	0.14209	-5.98382	-5.98382	-2.3925	-5.98382	6.93821	26.5712	6.91231e-05	0.000217138	762	20	8	7	13	24	0	0	0	0	0	0	1	2	0	0	0	0	0
MT2B2:Rimklb	Rimklb							X		chr6	122472763	122487983	NA	NA	NA	MT2B2	ERVL	LTR	-	promoter_tss	0	6.44935	7.56199	6.78256	5.1307	8.10036	17.5341	0.00359075	0.00654464	763	0	0	0	0	0	3	7	11	20	15	2	0	0	36	1	0	8	1
RLTR12C:Xpa	Xpa									chr4	46185696	46186080	NA	NA	NA	RLTR12C	ERVK	LTR	-	promoter_tss	0	7.64515	2.57845	4.30388	0	7.39322	32.1812	5.47002e-06	2.30169e-05	764	0	0	0	0	0	10	13	25	1	0	0	0	0	6	0	0	0	0
ERVB2_1-I_MM-int:Zfp109	Zfp109									chr7	24236675	24252320	NA	NA	NA	ERVB2_1-I_MM-int	ERVK	LTR	-	promoter_tss	2.5545	-0.25452	-1.0873	-0.528988	1.43608	6.98165	8.07449	0.152178	0.166064	765	0	5	20	13	11	1	1	0	0	1	0	1	1	0	0	11	0	0
B3:Cep97	Cep97									chr16	55924679	55924968	B3	B2	SINE	NA	NA	NA	-	terminator	0	7.17296	4.9988	7.16089	6.5909	8.09092	20.8029	0.00088252	0.00200751	766	0	0	0	0	0	12	7	14	2	0	5	32	0	2	2	27	3	0
PB1D10:Trmt5	Trmt5									chr12	73280325	73280488	PB1D10	Alu	SINE	NA	NA	NA	-	terminator	0	4.24105	7.5623	0	5.34175	7.48402	14.0393	0.0153615	0.0227475	767	0	0	0	0	0	0	0	5	0	32	8	0	0	0	0	0	10	0
B3:Tsacc	Tsacc									chr3	88286069	88287097	B3	B2	SINE	NA	NA	NA	-	internal/terminator	0	5.42925	5.96796	2.96519	7.42569	7.65227	25.1849	0.000128334	0.000374917	768	0	0	0	0	0	1	1	9	0	11	2	0	1	1	9	1	36	0
LFSINE_Vert:Jmjd6	Jmjd6									chr11	116839926	116840447	LFSINE_Vert	tRNA	SINE	NA	NA	NA	-	internal	-0.747417	2.2655	0.155715	-0.35793	0.456727	8.00082	11.2971	0.0457975	0.0579913	769	12	6	2	4	9	11	12	24	6	2	1	2	2	5	2	0	13	0
MLT1K:Mllt10	Mllt10								X	chr2	18071204	18082510	NA	NA	NA	MLT1K	ERVL-MaLR	LTR	+	internal	-2.86968	0.813104	3.2406	3.25505	3.08508	8.47155	26.4719	7.22646e-05	0.00022562	770	6	2	0	0	1	3	3	1	28	0	7	8	15	30	22	13	15	1
Lx5c:Las1l	Las1l				X					chrX	95920792	95921145	Lx5c	L1	LINE	NA	NA	NA	-	terminator	-1.68845	5.86312	4.17337	5.13674	4.90533	8.20665	24.8232	0.000150725	0.000432304	771	1	0	0	0	0	15	10	18	7	0	5	23	0	5	15	13	4	1
PB1D7:Dcaf17	Dcaf17									chr2	71089933	71099014	NA	NA	NA	PB1D7	Alu	SINE	+	terminator	2.09817	4.66849	4.99536	6.53297	7.43259	7.81471	27.4686	4.62229e-05	0.0001537	772	0	0	2	0	0	1	1	4	1	1	5	1	22	3	12	15	24	0
ORR1A2:Mkrn2os	Mkrn2os									chr6	115586804	115600134	NA	NA	NA	ORR1A2	ERVL-MaLR	LTR	-	promoter_tss	0	5.25057	2.58228	6.8204	7.47533	7.85953	22.8634	0.000358482	0.000918667	773	0	0	0	0	0	3	4	1	1	0	0	0	23	10	19	43	0	0
L3b:Plekho1	Plekho1									chr3	95990902	95991443	L3b	CR1	LINE	NA	NA	NA	-	internal	-0.338813	-3.31022	1.65809	-5.7652	-2.46344	7.58231	13.272	0.0209589	0.0296821	774	17	7	12	12	2	0	1	0	0	35	0	0	0	0	0	3	0	0
AmnSINE2:Huwe1	Huwe1			X	X					chrX	151921161	151921261	AmnSINE2	Deu	SINE	NA	NA	NA	+	internal	0	0	5.05175	6.28143	7.41184	7.65615	43.2047	3.35833e-08	2.54362e-07	775	0	0	0	0	0	0	0	0	3	0	4	8	7	6	16	13	22	2
MIRb:Cabin1	Cabin1							X	X	chr10	75755500	75764024	NA	NA	NA	MIRb	MIR	SINE	-	promoter_tss	-1.49533	-0.786908	-3.43199	-5.99518	-5.99518	6.77927	16.7471	0.0050052	0.00871135	776	7	21	11	0	2	3	3	2	1	0	0	0	0	0	0	0	0	2
LFSINE_Vert:Ptger3	Ptger3									chr3	157605144	157641720	NA	NA	NA	LFSINE_Vert	tRNA	SINE	+	internal	-4.58932	-5.99441	-5.99441	-5.99441	-5.99441	6.27461	19.7205	0.00140995	0.00297559	777	8	20	1	0	0	0	0	0	0	0	0	0	0	0	0	0	0	0
ID_B1:Rabif	Rabif									chr1	134501221	134506075	ID_B1	B4	SINE	NA	NA	NA	+	internal	0	3.81911	7.90636	5.16934	6.20618	7.92632	37.8347	4.07303e-07	2.22116e-06	778	0	0	0	0	0	1	1	1	18	3	32	7	0	2	12	4	7	0
PB1D11:Zfp451	Zfp451								X	chr1	33762209	33764513	NA	NA	NA	PB1D11	Alu	SINE	-	internal	-0.309948	-1.48328	-2.63681	-2.9368	-3.10144	7.01227	13.9703	0.0157992	0.0232776	779	14	14	17	3	11	2	1	2	0	1	1	1	1	0	1	0	1	1
MT2B:Spag5	Spag5									chr11	78313939	78314163	MT2B	ERVL	LTR	NA	NA	NA	+	internal	-3.07048	-1.44614	-0.547308	-0.801342	-3.95342	7.0608	15.1129	0.00989079	0.0156432	780	16	12	4	0	0	2	2	1	3	3	3	2	5	3	0	1	0	0
MTA_Mm:Plcb1	Plcb1									chr2	135249268	135249970	MTA_Mm	ERVL-MaLR	LTR	NA	NA	NA	+	promoter_tss	-3.88653	-5.98643	-3.46382	-2.91167	-5.98643	6.4023	19.5187	0.00153807	0.0032171	781	17	11	2	0	0	0	0	0	0	1	0	1	1	0	0	0	0	0
B1F:Prkg1	Prkg1									chr19	30721232	30724159	B1F	Alu	SINE	NA	NA	NA	-	internal	1.15984	2.54426	6.29775	3.89393	3.16955	7.90851	31.6809	6.87128e-06	2.83302e-05	782	0	1	0	1	3	2	1	1	14	3	41	4	6	3	0	7	2	0
MTA_Mm:Pdss2	Pdss2									chr10	43289648	43298798	MTA_Mm	ERVL-MaLR	LTR	NA	NA	NA	+	promoter	-3.0857	-2.64497	-2.06096	-1.27258	-3.86003	6.74069	10.9836	0.0517062	0.0642011	783	27	1	2	1	1	1	1	0	1	1	1	2	3	2	0	0	1	0
RLTR11A2:Kif3a	Kif3a									chr11	53586930	53590716	RLTR11A2	ERVK	LTR	NA	NA	NA	+	internal	-1.98661	-1.62608	3.51806	0.0678174	1.31767	7.57018	27.8604	3.8759e-05	0.000131229	784	2	5	1	1	0	0	1	0	23	9	6	0	1	4	8	6	0	0
IAPLTR2a2_Mm:Sult2a4	Sult2a4							X	X	chr7	13931767	13933240	NA	NA	NA	IAPLTR2a2_Mm	ERVK	LTR	-	promoter_tss	2.44197	-3.59346	-3.59346	-3.59346	-3.59346	6.56002	14.3073	0.013771	0.0207377	785	5	0	0	16	26	0	0	0	0	0	0	0	0	0	0	0	0	2
MT2A:Zfp868	Zfp868									chr8	69613874	69619313	NA	NA	NA	MT2A	ERVL	LTR	-	internal/promoter_tss	1.39658	3.3504	7.65288	6.54163	3.98179	7.77983	31.3651	7.93405e-06	3.21927e-05	786	0	0	1	0	0	1	1	0	8	20	15	11	0	15	1	4	0	0
B1F:Eml6	Eml6									chr11	30022983	30024379	B1F	Alu	SINE	NA	NA	NA	-	terminator	0	3.33991	5.12074	7.82125	7.37417	8.16949	44.5933	1.75503e-08	1.44138e-07	787	0	0	0	0	0	1	1	0	2	4	1	5	7	59	11	30	12	0
MT2C_Mm:Cd47	Cd47								X	chr16	49843152	49867764	MT2C_Mm	ERVL	LTR	NA	NA	NA	+	promoter_tss	0	7.63469	0	2.26258	2.01883	7.3059	45.0681	1.40534e-08	1.17303e-07	788	0	0	0	0	0	11	10	27	0	0	0	1	0	0	0	1	0	1
MIR:Mroh8	Mroh8									chr2	157208729	157210804	MIR	MIR	SINE	NA	NA	NA	-	terminator	0	7.57445	7.88766	3.07204	7.01083	8.4655	43.7599	2.5913e-08	2.03815e-07	789	0	0	0	0	0	10	7	30	20	1	31	1	1	0	19	4	16	0
ID4:Mrpl30	Mrpl30									chr1	37892172	37892942	ID4	ID	SINE	PB1D9	Alu	SINE	+	internal/promoter	2.11196	0	0	0	7.41878	7.18035	32.1477	5.55419e-06	2.3323e-05	790	0	0	2	0	0	0	0	0	0	0	0	0	0	0	10	19	22	0
ID2:Cenpa	Cenpa									chr5	30670410	30672463	ID2	ID	SINE	NA	NA	NA	+	internal	-1.69815	0.603854	5.74374	-1.69815	3.57787	7.34921	25.647	0.000104459	0.000312764	791	0	1	0	0	0	0	0	1	0	33	3	0	0	0	2	3	6	0
ORR1F:Kif9	Kif9									chr9	110521364	110523726	NA	NA	NA	ORR1F	ERVL-MaLR	LTR	+	terminator	3.28953	4.8347	2.22847	1.93869	5.65769	7.78586	20.8655	0.000858859	0.00196632	792	1	0	8	9	2	9	6	5	1	1	1	2	1	0	38	19	0	0
B1_Mus1:Akirin2	Akirin2								X	chr4	34553463	34562311	B1_Mus1	Alu	SINE	NA	NA	NA	+	promoter_tss	0.203438	-1.34213	-3.35131	-1.90135	-3.78709	7.11048	18.1755	0.00273427	0.00526019	793	14	12	15	7	20	2	2	1	1	0	0	2	2	0	0	0	1	1
PB1D9:Thoc7	Thoc7				X					chr14	13954656	13957553	NA	NA	NA	PB1D9	Alu	SINE	-	internal	-2.45838	-2.45838	4.39476	1.59341	4.90639	7.70859	20.4911	0.00101042	0.00224598	794	0	2	0	0	0	0	0	0	20	0	2	0	0	5	14	6	27	1
PB1D10:Cenpa	Cenpa									chr5	30667113	30668998	NA	NA	NA	PB1D10	Alu	SINE	+	internal	-0.154012	2.96603	0.780627	3.06495	2.78038	8.15946	9.48019	0.0913769	0.105158	795	2	5	0	9	0	9	5	17	2	1	3	29	1	4	2	6	23	0
AmnSINE1:Acss2	Acss2									chr2	155561206	155561745	NA	NA	NA	AmnSINE1	Deu	SINE	+	internal	0	0	2.43523	0	7.39598	7.17547	41.5215	7.36113e-08	5.06852e-07	796	0	0	0	0	0	0	0	0	0	0	1	0	0	0	15	27	12	0
L1MEd:Dram2	Dram2									chr3	106547920	106552155	NA	NA	NA	L1MEd	L1	LINE	+	internal	-1.29039	-2.61827	-0.282726	0.379832	0.660291	7.75016	9.70556	0.0840211	0.0974055	797	10	17	7	2	6	1	1	0	8	0	2	5	12	5	11	5	13	0
MTEb:Fam120c	Fam120c									chrX	151399803	151405634	NA	NA	NA	MTEb	ERVL-MaLR	LTR	+	internal/terminator	-1.58347	-5.93695	-5.93695	-5.93695	-5.93695	6.44383	17.9033	0.00307006	0.00580248	798	14	13	6	6	0	0	0	0	0	0	0	0	0	0	0	0	0	0
LFSINE_Vert:Pcbp2	Pcbp2									chr15	102486040	102488204	LFSINE_Vert	tRNA	SINE	NA	NA	NA	+	internal	-0.966901	-5.9334	-2.51003	-2.38116	0.327674	7.1766	14.6698	0.0118704	0.0182656	799	18	9	6	11	2	0	0	0	1	1	0	1	1	1	13	0	10	0
L2:Dhx9	Dhx9			X	X					chr1	153482882	153483739	L2	L2	LINE	NA	NA	NA	-	internal	1.41073	3.69052	7.37426	0	2.79291	7.1804	18.9373	0.0019745	0.00401537	800	0	0	1	0	0	0	1	2	0	33	1	0	0	0	0	2	0	2
PB1D11:Prdx6	Prdx6									chr1	161249469	161251021	PB1D11	Alu	SINE	NA	NA	NA	-	internal	0	2.47469	2.45243	6.27169	7.38421	7.55558	42.8455	3.97124e-08	2.94246e-07	801	0	0	0	0	0	1	0	0	0	0	1	9	10	1	16	31	8	0
MERV1_LTR:Mtf2	Mtf2				X					chr5	108060863	108069161	MERV1_LTR	ERV1	LTR	MTEb	ERVL-MaLR	LTR	+	internal/promoter_tss	0	4.90808	7.45736	5.10266	7.30124	8.03458	46.1564	8.44015e-09	7.3136e-08	802	0	0	0	0	0	1	2	4	5	23	9	1	2	7	23	6	19	1
MTB_Mm:Fgd6	Fgd6							X	X	chr10	94047018	94074182	MTB_Mm	ERVL-MaLR	LTR	NA	NA	NA	+	promoter_tss	0.426299	-2.31507	-5.64108	-2.06055	-5.64108	6.91363	25.5551	0.000108829	0.000323011	803	17	5	19	9	13	1	1	0	0	0	0	1	2	0	0	0	0	2
B4A:BC026585	BC026585									chr1	157455847	157458386	B4A	B4	SINE	NA	NA	NA	+	promoter	0	0	0	7.14576	0	6.98616	20.6845	0.000929085	0.00208789	804	0	0	0	0	0	0	0	0	0	0	0	0	26	16	0	0	0	0
ORR1A2:Ifitm10	Ifitm10									chr7	142328691	142337904	NA	NA	NA	ORR1A2	ERVL-MaLR	LTR	-	internal	0	0	0	0	7.36939	7.11198	19.518	0.00153854	0.0032171	805	0	0	0	0	0	0	0	0	0	0	0	0	0	0	0	10	34	0
L1M3:Zc2hc1b	Zc2hc1b									chr10	13166551	13167526	L1M3	L1	LINE	NA	NA	NA	-	terminator	0	3.26743	3.77831	7.12626	2.92383	7.11456	26.3309	7.69711e-05	0.000239583	806	0	0	0	0	0	1	0	1	0	0	3	26	2	7	0	1	1	0
RLTR19-int:Hnrnpa3	Hnrnpa3			X	X					chr2	75665301	75668000	RLTR19-int	ERVK	LTR	NA	NA	NA	+	internal	0	7.56376	6.13	2.13733	6.02233	7.80615	43.6095	2.77989e-08	2.14524e-07	807	0	0	0	0	0	8	12	26	5	8	1	0	0	1	14	3	4	2
RLTR17:Cds2	Cds2			X						chr2	132285965	132293244	RLTR17	ERVK	LTR	NA	NA	NA	+	promoter_tss	0	0	5.25986	7.30811	5.71549	7.52002	38.9769	2.40042e-07	1.38278e-06	808	0	0	0	0	0	0	0	0	4	0	4	13	10	22	12	2	3	1
RLTR14_RN:Mapk14	Mapk14							X		chr17	28737090	28741787	NA	NA	NA	RLTR14_RN	ERV1	LTR	+	internal	0.352173	5.41776	5.82387	5.30403	1.12179	8.21085	34.266	2.10763e-06	9.55678e-06	809	0	1	0	1	1	6	7	21	5	13	23	0	28	9	1	1	0	1
MTA_Mm:Cenpk	Cenpk									chr13	104238379	104242188	MTA_Mm	ERVL-MaLR	LTR	NA	NA	NA	+	promoter_tss	-3.01932	-5.89423	-5.89423	-2.81083	-5.89423	6.36508	17.6968	0.00335148	0.0062292	810	2	24	1	2	1	0	0	0	0	0	0	1	1	0	0	0	0	0
ORR1B1:Themis	Themis							X	X	chr10	28879714	28880950	ORR1B1	ERVL-MaLR	LTR	NA	NA	NA	+	promoter_tss	-0.355185	-5.88943	-5.88943	-2.86732	-5.88943	6.71737	23.8381	0.000233232	0.000631733	811	7	19	4	12	13	0	0	0	0	0	0	0	2	0	0	0	0	2
MTE2a:Ccdc170	Ccdc170								X	chr10	4466028	4512751	MTE2a	ERVL-MaLR	LTR	NA	NA	NA	+	promoter	-3.34563	-2.57393	-1.57676	-0.455237	-3.79288	6.85841	17.048	0.00440958	0.0078142	812	7	19	2	0	1	1	1	0	1	2	1	3	4	5	0	0	1	1
ORR1A1:Iqub	Iqub									chr6	24462033	24476693	NA	NA	NA	ORR1A1	ERVL-MaLR	LTR	-	promoter_tss	0	7.33373	5.98491	0	5.16039	7.53833	23.3853	0.000284853	0.000753589	813	0	0	0	0	0	12	13	11	11	0	1	0	0	0	1	11	0	0
B3A:Ccdc171	Ccdc171							X		chr4	83696115	83696250	B3A	B2	SINE	NA	NA	NA	+	internal	-2.99381	-1.33792	-1.91559	0.457007	-3.77961	7.15128	18.8909	0.00201421	0.00408233	816	14	12	2	0	2	2	2	1	2	1	0	4	3	17	0	0	1	1
MIR:Uba2	Uba2									chr7	34141852	34142737	MIR	MIR	SINE	NA	NA	NA	-	terminator	-2.47463	0.17504	-0.117243	2.24251	-0.271003	7.27409	6.81791	0.234539	0.248385	817	1	9	1	1	0	2	1	3	0	0	5	0	31	0	0	5	1	0
LFSINE_Vert:Tcerg1	Tcerg1									chr18	42574253	42574517	LFSINE_Vert	tRNA	SINE	NA	NA	NA	+	internal	-1.95123	0.899986	4.22523	-3.31542	2.25622	7.53876	41.8593	6.28937e-08	4.38968e-07	818	1	3	0	0	1	1	2	1	20	8	10	0	0	0	1	11	3	0
B1F1:Ppig	Ppig									chr2	69722957	69731490	NA	NA	NA	B1F1	Alu	SINE	+	internal	-1.53543	0.385919	-0.251581	0.132101	-1.73744	7.60386	6.78364	0.237235	0.25098	819	17	9	6	2	4	7	5	5	7	0	3	8	6	3	0	2	3	0
B1_Mus2:Ears2	Ears2									chr7	122039896	122044301	B1_Mus2	Alu	SINE	NA	NA	NA	-	terminator	0	0	2.41438	5.52874	7.32418	7.34709	24.4636	0.000176805	0.000496657	820	0	0	0	0	0	0	0	0	0	0	1	10	0	1	4	10	30	0
MERV1_LTR:4921524J17Rik	4921524J17Rik									chr8	85426956	85440526	NA	NA	NA	MERV1_LTR	ERV1	LTR	-	promoter_tss	2.72697	1.24158	-0.758934	-3.32059	-3.32059	6.74846	18.7439	0.00214507	0.0042802	821	0	4	22	16	2	2	2	1	1	0	0	0	0	0	0	0	0	0
ORR1A2-int:Ascc3	Ascc3									chr10	50784749	50823635	ORR1A2-int	ERVL-MaLR	LTR	NA	NA	NA	+	promoter_tss	2.73566	1.88746	-3.31187	-0.250349	-3.31187	6.85425	24.4659	0.000176628	0.000496657	822	2	2	23	9	8	3	3	2	0	0	0	1	1	0	0	0	0	0
RLTR20A4:Ccdc18	Ccdc18									chr5	108180891	108188931	RLTR20A4	ERVK	LTR	NA	NA	NA	+	internal	-0.783091	1.70187	-1.66855	-0.84824	-3.62004	7.60665	20.6536	0.000941632	0.00210452	823	16	6	13	1	3	10	14	13	2	1	0	1	1	6	1	0	0	0
B1F:Ddx27	Ddx27	X			X					chr2	167024557	167024790	NA	NA	NA	B1F	Alu	SINE	+	terminator	0	7.2388	7.7456	5.44852	6.12068	8.25863	22.9623	0.000343211	0.000885079	824	0	0	0	0	0	9	8	19	2	17	30	0	12	0	11	13	0	2
MLT1E1:Tmem214	Tmem214									chr5	30874361	30874536	NA	NA	NA	MLT1E1	ERVL-MaLR	LTR	+	internal	5.27661	4.60926	6.68947	7.28724	6.25913	8.04957	15.0297	0.0102362	0.0161024	825	0	0	5	8	11	2	3	0	4	15	2	23	0	19	11	14	1	0
MIR3:Trnau1ap	Trnau1ap									chr4	132325260	132325351	NA	NA	NA	MIR3	MIR	SINE	-	internal	-2.95312	1.56091	3.43855	4.03741	2.06851	7.59186	15.5597	0.00822037	0.0133843	827	0	3	0	0	0	2	1	2	3	3	13	29	0	1	7	0	3	0
MTA_Mm:Pak7	Pak7									chr2	136174275	136177583	NA	NA	NA	MTA_Mm	ERVL-MaLR	LTR	-	promoter_tss	1.28323	-4.6768	-4.6768	-4.6768	-4.6768	6.60923	26.1835	8.22141e-05	0.000252066	828	5	6	7	20	12	0	0	0	0	0	0	0	0	0	0	0	0	0
MTA_Mm:Ermp1	Ermp1					X		X	X	chr19	29637396	29639438	NA	NA	NA	MTA_Mm	ERVL-MaLR	LTR	-	promoter_tss	5.96326	0	0	0	0	6.45858	27.701	4.16392e-05	0.000139858	829	0	0	8	19	12	0	0	0	0	0	0	0	0	0	0	0	0	3
MTD-int:LOC108167371	LOC108167371									chr13	66592747	66596247	MTD-int	ERVL-MaLR	LTR	NA	NA	NA	+	internal/promoter	0	4.55522	3.91774	5.66147	7.25536	7.49699	34.9134	1.5657e-06	7.31016e-06	830	0	0	0	0	0	2	2	1	1	1	1	2	9	3	32	20	1	0
MTE2a:Eif2s3y	Eif2s3y									chrY	1023474	1034961	NA	NA	NA	MTE2a	ERVL-MaLR	LTR	+	internal/terminator	0	4.64801	2.41033	6.78875	0	6.95367	20.6736	0.000933518	0.00209555	831	0	0	0	0	0	1	1	4	0	0	1	0	30	1	0	0	0	0
MT2_Mm:Sp110	Sp110									chr1	85598779	85603834	NA	NA	NA	MT2_Mm	ERVL	LTR	-	promoter_tss	1.0711	0.744731	2.0475	2.00679	-1.58979	8.02057	11.0897	0.0496303	0.0619622	832	3	10	14	18	7	3	6	2	11	11	3	0	20	16	2	1	0	0
L2a:Nfatc2	Nfatc2									chr2	168519552	168523237	L2a	L2	LINE	NA	NA	NA	-	terminator	3.54415	-2.457	-2.457	-2.457	-2.457	6.50235	25.7466	9.9919e-05	0.000300788	833	0	2	19	10	10	0	0	0	0	0	0	0	0	0	0	0	0	0
MT2B1:B020031M17Rik	B020031M17Rik							X	X	chr13	119950096	119950621	NA	NA	NA	MT2B1	ERVL	LTR	-	promoter_tss	0	7.65182	2.5691	0	6.15299	7.63138	36.9959	6.00093e-07	3.13059e-06	834	0	0	0	0	0	8	7	36	1	0	0	0	0	0	3	1	15	2
MIRb:Anapc15	Anapc15									chr7	101897360	101897732	NA	NA	NA	MIRb	MIR	SINE	+	internal	2.53262	2.45184	7.53262	0	4.21013	7.31586	23.1745	0.000312593	0.000813298	835	0	0	1	2	0	0	1	0	27	0	10	0	0	0	1	5	0	0
PB1D9:Nf2	Nf2				X					chr11	4772638	4782186	PB1D9	Alu	SINE	NA	NA	NA	-	terminator	0	2.44416	7.54851	4.7754	3.31629	7.38883	31.2696	8.28622e-06	3.32914e-05	836	0	0	0	0	0	0	1	0	25	1	12	1	1	6	0	3	0	1
RMER4B:Slu7	Slu7				X					chr11	43436432	43437344	RMER4B	ERVK	LTR	NA	NA	NA	+	internal	-0.326342	-5.83075	-5.83075	-0.504771	-5.83075	6.91229	16.6599	0.00519206	0.00897529	837	10	15	8	10	10	0	0	0	0	0	0	0	11	0	0	0	0	1
MMERVK9C_I-int:Amy1	Amy1									chr3	113565066	113569381	NA	NA	NA	MMERVK9C_I-int	ERVK	LTR	-	internal	0	4.36334	4.47818	0	7.20189	7.23854	21.4517	0.000665348	0.00157117	838	0	0	0	0	0	1	0	4	0	1	4	0	0	0	21	0	22	0
MTB:Cldn34b2	Cldn34b2								X	chrX	155125855	155147699	NA	NA	NA	MTB	ERVL-MaLR	LTR	-	promoter_tss	-3.71834	-5.82678	-5.82678	-5.82678	-5.82678	6.24043	19.7033	0.00142049	0.00299165	839	14	11	2	0	0	0	0	0	0	0	0	0	0	0	0	0	0	1
B3:Zfp322a	Zfp322a									chr13	23357713	23362579	NA	NA	NA	B3	B2	SINE	-	internal	-1.8963	-1.92944	-5.82592	-2.76209	-0.908371	6.76587	11.5241	0.0419236	0.0536842	841	15	10	2	6	1	2	1	0	0	0	0	1	1	0	6	4	0	0
Lx8b:Itgb1bp1	Itgb1bp1									chr12	21271037	21271418	Lx8b	L1	LINE	NA	NA	NA	-	terminator	0	0	3.43893	5.85264	7.30242	7.42804	31.2009	8.54944e-06	3.42145e-05	842	0	0	0	0	0	0	0	0	1	1	0	1	1	16	3	24	20	0
MT2B2:Tfcp2	Tfcp2									chr15	100518680	100520562	NA	NA	NA	MT2B2	ERVL	LTR	-	internal	3.36345	6.51031	7.88144	6.18139	5.39819	8.18703	19.3522	0.00165229	0.00342692	843	0	0	0	1	5	4	2	17	0	12	44	7	11	1	7	2	4	0
ID_B1:Cenpp	Cenpp									chr13	49544731	49548951	NA	NA	NA	ID_B1	B4	SINE	-	internal	-0.550814	-2.46957	-5.82193	-5.82193	-5.82193	6.65288	20.6327	0.000950208	0.00212137	844	19	6	14	8	1	1	1	0	0	0	0	0	0	0	0	0	0	0
ORR1C1:Chpt1	Chpt1									chr10	88486011	88488381	ORR1C1	ERVL-MaLR	LTR	NA	NA	NA	-	terminator	-1.69055	1.6193	4.42321	4.77685	5.58622	7.80861	53.9481	2.14791e-10	2.5687e-09	845	1	0	0	0	0	1	1	0	3	4	8	6	8	11	15	29	7	0
MT2_Mm:Iqcf1	Iqcf1							X		chr9	106493380	106500497	MT2_Mm	ERVL	LTR	NA	NA	NA	+	promoter_tss	1.36478	6.19003	4.92151	4.16403	7.20419	7.60151	38.7642	2.64902e-07	1.5132e-06	846	0	0	0	0	1	4	5	8	4	1	1	0	2	3	17	7	20	1
MTD:Dnm3	Dnm3									chr1	162407408	162424495	NA	NA	NA	MTD	ERVL-MaLR	LTR	-	promoter_tss	1.06446	-2.46606	-1.48027	-0.993123	-4.89897	6.82994	16.6018	0.00532026	0.00917364	847	12	1	19	4	15	0	1	0	1	1	0	1	1	2	0	0	0	0
ORR1D2:Dtnbp1	Dtnbp1									chr13	44952380	44953171	ORR1D2	ERVL-MaLR	LTR	NA	NA	NA	-	terminator	0	5.54164	7.58614	6.85808	6.96171	8.26404	33.0003	3.763e-06	1.64079e-05	848	0	0	0	0	0	2	3	6	8	14	20	4	7	24	0	21	16	0
MTE2b:Rbpms	Rbpms			X	X					chr8	33866404	33907388	NA	NA	NA	MTE2b	ERVL-MaLR	LTR	-	promoter_tss	0	5.11603	6.92124	6.74209	5.02491	7.68969	19.3962	0.00162131	0.00338324	849	0	0	0	0	0	2	2	4	9	0	18	0	29	1	6	1	3	2
L1MA6:Mboat2	Mboat2									chr12	24882794	24898371	NA	NA	NA	L1MA6	L1	LINE	+	terminator	-2.45027	1.3626	2.19981	3.1568	4.80409	7.49965	42.1666	5.45044e-08	3.8435e-07	850	1	1	0	0	0	1	1	1	3	1	1	3	2	9	9	22	16	0
ID2:Cenpa	Cenpa									chr5	30667113	30670374	NA	NA	NA	ID2	ID	SINE	+	internal	-1.69898	-1.69898	5.54205	0.386554	0.282556	7.03093	20.3002	0.00109755	0.00241344	851	0	1	0	0	0	0	0	0	0	30	1	0	0	1	1	0	0	0
B1_Mus2:Ints8	Ints8									chr4	11212931	11213705	B1_Mus2	Alu	SINE	NA	NA	NA	-	internal	0	0	7.24138	2.06863	0	7.00222	18.6169	0.00226486	0.004475	852	0	0	0	0	0	0	0	0	0	30	1	0	0	1	0	0	0	0
B1_Mur3:Zdhhc9	Zdhhc9									chrX	48183158	48184671	NA	NA	NA	B1_Mur3	Alu	SINE	-	promoter_tss	0	0	7.2411	2.08235	1.99773	7.02096	21.222	0.000735448	0.00171297	853	0	0	0	0	0	0	0	0	0	30	1	0	0	1	0	1	0	0
L3b:Copz2	Copz2						X	X		chr11	96854639	96855255	NA	NA	NA	L3b	CR1	LINE	+	internal	5.85549	0	0	0	0	6.41563	14.8337	0.0110973	0.0172972	854	0	0	0	14	23	0	0	0	0	0	0	0	0	0	0	0	0	2
ORR1A3:Brip1	Brip1									chr11	86103800	86103903	ORR1A3	ERVL-MaLR	LTR	PB1D9	Alu	SINE	-	internal/terminator	2.03355	-3.84447	-3.84447	-0.771218	-3.84447	6.57159	22.5706	0.000407702	0.00102679	855	4	2	5	15	17	0	0	0	0	0	0	1	1	0	0	0	0	0
L2:C2cd2	C2cd2									chr16	97859576	97868591	L2	L2	LINE	NA	NA	NA	-	terminator	1.10535	-2.45985	3.37405	4.23988	2.13162	7.29214	4.78681	0.442448	0.451725	856	0	2	0	7	0	0	0	0	0	0	14	0	29	0	0	8	0	0
MIRc:Suv420h1	Suv420h1									chr19	3796708	3802074	MIRc	MIR	SINE	NA	NA	NA	+	internal/promoter_tss	2.50818	7.24597	6.64863	7.24936	6.12633	8.2613	30.6924	1.07723e-05	4.20406e-05	857	0	0	0	0	3	12	11	11	9	4	8	11	8	25	17	7	0	0
L1M2:Slc35b3	Slc35b3									chr13	38951862	38954108	L1M2	L1	LINE	NA	NA	NA	-	internal	-5.00487	-1.18219	-5.00487	2.2777	-5.00487	7.25647	31.119	8.87365e-06	3.53735e-05	858	11	3	0	0	0	1	1	1	0	0	0	20	0	23	0	0	0	0
MTA_Mm:Cd69	Cd69									chr6	129271457	129277641	NA	NA	NA	MTA_Mm	ERVL-MaLR	LTR	-	promoter_tss	-2.90829	-5.78072	-5.78072	-5.78072	-5.78072	6.26012	17.4569	0.00371003	0.00670823	859	2	22	1	1	2	0	0	0	0	0	0	0	0	0	0	0	0	0
MIR3:Plek	Plek						X	X		chr11	16974153	16981800	MIR3	MIR	SINE	NA	NA	NA	-	terminator	1.10848	-4.80621	-4.80621	-4.80621	-4.80621	6.6058	22.3523	0.000448711	0.00111199	860	1	11	15	9	13	0	0	0	0	0	0	0	0	0	0	0	0	2
PB1:Det1	Det1									chr7	78823260	78827571	PB1	Alu	SINE	NA	NA	NA	-	terminator	-1.63282	-1.95682	-5.77854	-5.77854	-3.77302	6.50627	13.8854	0.0163539	0.023974	861	4	20	9	1	0	1	1	1	0	0	0	0	0	0	1	0	0	0
B1_Mur2:3110001I22Rik	3110001I22Rik									chr16	13676510	13676833	B1_Mur2	Alu	SINE	NA	NA	NA	+	internal	-1.67159	-1.54156	-1.46248	-2.71712	-5.77713	6.71413	12.8723	0.0246051	0.0339912	862	5	19	6	1	3	2	1	1	1	2	1	1	1	0	0	0	0	0
MTB_Mm:Pik3cd	Pik3cd							X	X	chr4	149674194	149683030	NA	NA	NA	MTB_Mm	ERVL-MaLR	LTR	-	promoter_tss	4.23019	-1.69707	-1.69707	-1.69707	-1.69707	6.45716	26.7789	6.29854e-05	0.000200944	863	0	1	18	13	6	0	0	0	0	0	0	0	0	0	0	0	0	2
Lx5b:C87414	C87414									chr5	93665413	93668526	Lx5b	L1	LINE	Lx5b	L1	LINE	-	internal	-0.242184	-5.77142	-5.77142	-5.77142	-5.77142	6.63827	28.5372	2.85736e-05	9.90392e-05	864	11	13	13	11	4	0	0	0	0	0	0	0	0	0	0	0	0	0
B1F2:Ecsit	Ecsit									chr9	22078265	22084022	NA	NA	NA	B1F2	Alu	SINE	-	internal/promoter_tss	0	3.26774	7.70844	6.83648	2.01245	7.83803	30.9732	9.48207e-06	3.77254e-05	865	0	0	0	0	0	1	0	1	6	0	44	12	15	3	0	1	0	0
MT2C_Mm:Kank4	Kank4									chr4	98785741	98823697	NA	NA	NA	MT2C_Mm	ERVL	LTR	-	promoter_tss	0	3.21521	5.98591	7.23011	5.21153	7.55745	17.5988	0.00349366	0.0064268	866	0	0	0	0	0	0	1	1	11	0	1	0	19	27	0	3	7	0
RMER15:Tmem117	Tmem117							X		chr15	94856556	94879380	RMER15	ERVL	LTR	NA	NA	NA	+	promoter_tss	0.0852024	-1.89209	-2.34676	-0.870706	-3.64927	7.07981	11.281	0.0460843	0.0582823	867	22	2	17	9	9	1	2	0	1	1	0	2	4	2	0	0	1	1
ORR1A2:Ccdc40	Ccdc40									chr11	119262479	119263074	ORR1A2	ERVL-MaLR	LTR	NA	NA	NA	+	promoter_tss	0	2.51477	7.76216	5.88505	6.17016	7.89741	23.9253	0.000224409	0.000611075	868	0	0	0	0	0	1	0	0	15	0	34	8	6	1	16	9	0	0
L1MB2:Nrf1	Nrf1									chr6	30048113	30088832	NA	NA	NA	L1MB2	L1	LINE	+	internal	-0.892333	1.8353	4.52891	3.48689	-0.130809	7.71449	25.7493	9.98017e-05	0.000300788	869	3	0	0	0	2	2	2	2	15	9	13	10	0	14	2	0	0	0
ORR1D-int:LOC108168101	LOC108168101									chr13	74612948	74617201	ORR1D-int	ERVL-MaLR	LTR	NA	NA	NA	-	internal	0	4.82934	7.32081	2.09104	4.72785	7.33102	18.0877	0.00283848	0.0054402	870	0	0	0	0	0	2	3	1	29	0	1	0	0	1	9	0	0	0
MTA_Mm:Chn1	Chn1							X	X	chr2	73659757	73665747	NA	NA	NA	MTA_Mm	ERVL-MaLR	LTR	-	promoter_tss	2.0016	-3.85422	-3.85422	-3.85422	-3.85422	6.50221	23.6318	0.000255493	0.000685673	871	1	5	9	16	11	0	0	0	0	0	0	0	0	0	0	0	0	2
Lx5c:Pmfbp1	Pmfbp1							X		chr8	109378745	109488033	NA	NA	NA	Lx5c	L1	LINE	+	internal	0.165124	-5.70098	-5.70098	-5.70098	-5.70098	6.72393	20.8635	0.000859604	0.00196632	872	20	3	11	23	2	0	0	0	0	0	0	0	0	0	0	0	0	1
PB1D10:Chtop	Chtop									chr3	90500107	90500380	NA	NA	NA	PB1D10	Alu	SINE	-	internal	0	0	4.98201	6.97547	3.94548	7.14643	24.7318	0.000156965	0.000448315	873	0	0	0	0	0	0	0	0	1	1	5	1	22	14	5	0	0	0
ID_B1:Esrrb	Esrrb	X	X	X	X					chr12	86504523	86505814	ID_B1	B4	SINE	NA	NA	NA	+	promoter_tss	2.93383	-2.94203	-2.94203	0.131775	-2.94203	6.52913	23.0326	0.000332752	0.000861364	874	2	1	15	5	16	0	0	0	0	0	0	1	1	0	0	0	0	4
L1M2:Slc35b3	Slc35b3									chr13	38944654	38951769	NA	NA	NA	L1M2	L1	LINE	-	internal	-3.60248	-0.23526	-3.60248	3.64033	-3.60248	7.13627	29.4332	1.90638e-05	6.94929e-05	875	3	2	0	0	0	1	1	0	0	0	0	19	0	23	0	0	0	0
PB1D10:Cct6b	Cct6b									chr11	82742120	82751426	NA	NA	NA	PB1D10	Alu	SINE	-	promoter_tss	0	0	3.78732	6.22581	7.15179	7.44307	33.9864	2.39591e-06	1.07448e-05	876	0	0	0	0	0	0	0	0	0	0	3	5	14	1	13	13	17	0
MTA_Mm:Ccnb1ip1	Ccnb1ip1									chr14	50793874	50794707	NA	NA	NA	MTA_Mm	ERVL-MaLR	LTR	-	internal/promoter_tss	0	4.71529	3.41358	3.48421	7.09798	7.21447	42.5175	4.6278e-08	3.35597e-07	877	0	0	0	0	0	1	2	3	1	1	0	0	1	2	24	6	13	0
Plat_L3:Zranb2	Zranb2				X					chr3	157546149	157546674	Plat_L3	CR1	LINE	NA	NA	NA	+	internal	-0.305092	2.12059	0.848829	5.00349	5.47967	7.61959	35.9439	9.74653e-07	4.77978e-06	878	0	1	1	0	0	1	1	1	1	0	0	1	20	9	6	18	19	1
RLTR22_Mus:Tcp11l1	Tcp11l1									chr2	104705201	104706355	RLTR22_Mus	ERVK	LTR	NA	NA	NA	-	terminator	0	6.87745	6.36962	5.30849	7.15183	7.98978	19.1961	0.001767	0.00363533	879	0	0	0	0	0	4	4	22	4	0	15	0	10	1	2	3	32	0
MT2_Mm:Echdc3	Echdc3							X	X	chr2	6195783	6197447	NA	NA	NA	MT2_Mm	ERVL	LTR	-	promoter_tss	0	7.27448	5.54995	0	6.27193	7.62753	36.8526	6.4112e-07	3.31922e-06	880	0	0	0	0	0	10	10	16	8	0	1	0	0	0	5	12	7	2
MTEb:Mtf2	Mtf2				X					chr5	108067572	108069161	NA	NA	NA	MTEb	ERVL-MaLR	LTR	+	internal	-1.0565	-0.164285	1.68497	-3.35929	0.638833	7.87213	7.20344	0.205945	0.220155	881	12	10	0	2	13	5	4	0	27	0	4	1	0	0	13	14	0	1
MIR:Clcn5	Clcn5							X	X	chrX	7279358	7299897	NA	NA	NA	MIR	MIR	SINE	-	internal	-0.387947	-2.39426	-1.79919	-0.82544	-3.61238	6.95614	10.269	0.0679628	0.0805237	882	7	16	15	2	7	1	1	0	1	1	1	2	4	2	0	0	1	2
B1_Mus2:Cnbd2	Cnbd2									chr2	156353309	156356525	NA	NA	NA	B1_Mus2	Alu	SINE	+	terminator	0	4.55964	5.17887	7.0945	6.06748	7.57968	27.9097	3.79089e-05	0.000128563	883	0	0	0	0	0	2	2	1	6	0	1	1	19	21	11	8	3	0
B3A:Cyb561a3	Cyb561a3									chr19	10578083	10578981	NA	NA	NA	B3A	B2	SINE	+	internal	-4.3527	-5.71181	-5.71181	-0.792694	-1.77259	6.57664	11.456	0.0430524	0.0548549	884	10	13	0	1	0	0	0	0	0	0	0	7	0	0	0	1	3	0
B3:3110009E18Rik	3110009E18Rik			X						chr1	120126392	120150602	B3	B2	SINE	NA	NA	NA	+	internal/promoter	-0.710486	-5.71071	-5.71071	-5.71071	-5.71071	6.49747	19.2268	0.00174383	0.00359127	885	11	12	11	7	1	0	0	0	0	0	0	0	0	0	0	0	0	1
ID_B1:Sypl	Sypl								X	chr12	32967743	32969180	NA	NA	NA	ID_B1	B4	SINE	+	terminator	-2.57151	-5.70866	-0.90769	-2.64513	-5.70866	6.54483	18.7282	0.00215952	0.00429277	887	13	10	0	2	3	0	0	0	1	1	4	1	1	0	0	0	0	1
MT2_Mm:Supt3	Supt3									chr17	44765378	44786609	MT2_Mm	ERVL	LTR	NA	NA	NA	+	promoter_tss	0	3.2667	5.9187	5.96419	7.08541	7.59877	28.2794	3.20955e-05	0.000110126	888	0	0	0	0	0	1	0	1	0	3	11	8	7	1	29	13	4	0
RLTR17B_Mm:Mfsd11	Mfsd11									chr11	116871468	116873243	NA	NA	NA	RLTR17B_Mm	ERVK	LTR	+	internal	1.36362	4.7528	6.23087	5.14196	7.09531	7.61899	23.4167	0.000280933	0.000744181	889	0	0	0	1	0	1	3	2	5	9	1	0	0	11	18	9	15	0
MIR:Mroh8	Mroh8									chr2	157208729	157213675	MIR	MIR	SINE	NA	NA	NA	-	terminator	0	0	0	0	7.14522	6.98858	34.2453	2.12773e-06	9.62658e-06	890	0	0	0	0	0	0	0	0	0	0	0	0	0	0	9	18	16	0
ID_B1:Frrs1	Frrs1			X	X					chr3	116866277	116878233	ID_B1	B4	SINE	NA	NA	NA	+	internal/promoter	0	4.81896	6.84621	6.32461	7.16698	7.94667	26.6929	6.54596e-05	0.000207865	891	0	0	0	0	0	2	3	1	18	3	1	5	0	19	9	27	10	2
L2a:Arl5c	Arl5c		X						X	chr11	97990339	97991497	NA	NA	NA	L2a	L2	LINE	-	promoter_tss	0	0	0	6.92477	0	6.82593	20.1424	0.0011751	0.00256191	892	0	0	0	0	0	0	0	0	0	0	0	24	0	6	0	0	0	2
MTC:Rnf141	Rnf141							X	X	chr7	110837270	110837408	NA	NA	NA	MTC	ERVL-MaLR	LTR	-	promoter_tss	0.735248	-0.893083	1.91434	-5.11665	-5.11665	7.43872	21.8308	0.000563838	0.00136942	893	2	13	18	11	6	1	2	1	0	25	2	0	0	0	0	0	0	2
MTD:Cenpa	Cenpa									chr5	30669052	30669691	NA	NA	NA	MTD	ERVL-MaLR	LTR	+	internal	0.454514	2.55819	0.236669	-0.977263	3.05839	7.71294	10.9929	0.0515204	0.0640482	894	2	5	1	13	0	5	4	15	2	0	2	1	1	0	1	3	32	0
MTD:Cenpl	Cenpl									chr1	161078480	161079867	NA	NA	NA	MTD	ERVL-MaLR	LTR	+	internal	0	4.56629	4.27379	6.96776	6.0777	7.4537	22.0955	0.000502148	0.00122878	895	0	0	0	0	0	2	2	1	1	1	2	22	1	9	1	22	0	0
RSINE1:Gabpb2	Gabpb2				X					chr3	95216268	95217588	RSINE1	B4	SINE	NA	NA	NA	-	internal	0	7.22023	4.8717	6.80623	5.34094	7.81808	10.1536	0.0709982	0.083732	896	0	0	0	0	0	7	3	28	0	0	7	26	0	0	0	0	10	1
Lx10:Mospd1	Mospd1							X		chrX	53357827	53412207	NA	NA	NA	Lx10	L1	LINE	-	internal	1.61836	0.52915	-1.72298	-2.05251	-2.13208	6.80624	15.3047	0.00913673	0.0146202	897	3	5	20	12	3	2	2	2	0	1	0	0	1	0	0	0	1	1
MTEa-int:Slc25a53	Slc25a53									chrX	137003809	137015256	MTEa-int	ERVL-MaLR	LTR	NA	NA	NA	-	internal/terminator	0	3.31425	5.55682	5.82371	7.08879	7.52104	49.4816	1.76911e-09	1.88429e-08	898	0	0	0	0	0	1	1	0	3	2	5	3	6	7	22	13	9	0
MIRc:Fech	Fech									chr18	64461685	64462106	NA	NA	NA	MIRc	MIR	SINE	-	internal	-0.135851	-1.00193	1.09624	-0.131791	2.22652	7.6934	5.25194	0.385914	0.39638	899	9	4	0	9	8	1	2	0	11	1	0	1	1	6	0	7	30	0
MT2C_Mm:Glrx5	Glrx5								X	chr12	105021386	105040274	MT2C_Mm	ERVL	LTR	NA	NA	NA	+	promoter_tss	0	5.39585	6.55914	2.13325	7.05744	7.60595	37.0729	5.79139e-07	3.03677e-06	900	0	0	0	0	0	2	2	6	6	6	8	0	0	1	18	1	20	1
L1MD2:Btrc	Btrc			X	X					chr19	45363886	45406544	NA	NA	NA	L1MD2	L1	LINE	+	internal	-0.32726	-1.68894	1.59788	5.16385	2.54195	6.992	28.9715	2.34879e-05	8.34975e-05	901	1	0	0	0	1	0	0	0	0	0	2	12	12	7	1	5	0	2
B1_Mur4:Oma1	Oma1									chr4	103316338	103319021	B1_Mur4	Alu	SINE	NA	NA	NA	+	promoter	0	3.82035	6.75709	7.62782	4.0295	7.84595	35.0747	1.45385e-06	6.85328e-06	902	0	0	0	0	0	1	1	1	8	10	4	3	4	56	4	0	1	0
MTC:Pcca	Pcca									chr14	122752162	122790355	MTC	ERVL-MaLR	LTR	NA	NA	NA	+	promoter_tss	2.81053	1.28925	-0.429315	0.113742	-2.94651	6.65863	17.8818	0.00309827	0.00583421	903	1	2	4	14	16	2	1	1	0	1	0	1	1	0	0	0	0	0
MT2B:Ggta1	Ggta1							X	X	chr2	35422268	35423231	NA	NA	NA	MT2B	ERVL	LTR	-	internal	0.341633	-2.9786	-2.89759	-2.33442	-0.514294	6.957	6.12456	0.294286	0.307362	904	19	0	8	7	19	0	1	0	0	1	0	1	1	0	0	10	0	2
Lx3A:Gdap1	Gdap1							X	X	chr1	17151391	17156960	Lx3A	L1	LINE	NA	NA	NA	+	promoter_tss	1.5567	-0.874644	-4.22689	-2.03806	-4.22689	6.60265	16.7922	0.00491127	0.0085942	905	8	0	11	10	13	1	1	0	0	0	0	0	1	0	0	0	0	2
MTB:Etl4	Etl4			X						chr2	20513079	20529958	MTB	ERVL-MaLR	LTR	NA	NA	NA	+	promoter_tss	0	0	3.42827	7.25294	6.09421	7.44985	39.1032	2.26392e-07	1.31901e-06	906	0	0	0	0	0	0	0	0	1	1	0	14	2	28	8	6	7	1
ORR1A4:Tnfsf13b	Tnfsf13b									chr8	10014053	10014168	ORR1A4	ERVL-MaLR	LTR	ORR1A4	ERVL-MaLR	LTR	+	internal/promoter_tss	-1.36403	0.286855	-2.31436	0.0134924	0.100222	7.44012	5.00965	0.414703	0.424884	908	1	21	0	8	4	5	3	6	0	1	1	8	3	2	1	8	7	0
L1MEd:Dram2	Dram2									chr3	106552280	106561748	L1MEd	L1	LINE	NA	NA	NA	+	internal/promoter_tss	-1.68649	-1.68649	0.717352	5.10072	0.295676	6.80511	17.6952	0.00335372	0.0062292	909	1	0	0	0	0	0	0	0	0	0	1	25	0	1	1	0	0	0
L1M4b:Papd4	Papd4									chr13	93186476	93192093	NA	NA	NA	L1M4b	L1	LINE	-	promoter_tss	-1.88479	-1.83624	-2.19577	-0.330221	-1.48618	6.91159	3.61586	0.605934	0.611918	910	2	20	2	4	2	1	1	1	2	0	0	0	11	0	1	1	3	0
B3:Wasf2	Wasf2									chr4	133160530	133176440	B3	B2	SINE	NA	NA	NA	+	internal	0	2.27671	2.40092	6.59029	0	6.7203	18.124	0.00279498	0.00536186	911	0	0	0	0	0	0	0	1	0	0	1	0	26	1	0	0	0	0
MTC:Tmem171	Tmem171								X	chr13	98692717	98708267	NA	NA	NA	MTC	ERVL-MaLR	LTR	-	promoter_tss	0.0857268	-5.65384	-5.65384	-5.65384	-5.65384	6.67501	26.7644	6.33962e-05	0.00020194	912	5	17	10	13	10	0	0	0	0	0	0	0	0	0	0	0	0	1
B1_Mur2:Cenpp	Cenpp									chr13	49627149	49627254	B1_Mur2	Alu	SINE	NA	NA	NA	-	terminator	0	7.09555	7.72235	5.61028	6.18733	8.23565	30.1108	1.4026e-05	5.28234e-05	913	0	0	0	0	0	7	4	23	9	2	38	5	5	3	13	0	9	0
B1_Mm:Pnpla3	Pnpla3									chr15	84186081	84187118	NA	NA	NA	B1_Mm	Alu	SINE	+	terminator	0	4.42465	6.29102	3.3862	7.07646	7.47727	16.3692	0.00586524	0.00996213	914	0	0	0	0	0	1	1	3	10	0	6	0	0	3	1	0	33	0
MTD-int:Frmd5	Frmd5		X						X	chr2	121591762	121687128	NA	NA	NA	MTD-int	ERVL-MaLR	LTR	-	promoter_tss	-3.08853	-5.64842	-5.64842	-5.64842	-5.64842	6.20653	16.2088	0.0062725	0.0105608	915	10	12	2	1	0	0	0	0	0	0	0	0	0	0	0	0	0	2
RLTR10A:Fbxo42	Fbxo42								X	chr4	141167977	141170823	RLTR10A	ERVK	LTR	NA	NA	NA	+	internal	-3.1155	-5.6473	-1.72817	-2.5692	-0.86814	6.62732	10.408	0.0644676	0.0769173	916	11	11	1	2	0	0	0	0	1	1	1	1	1	0	0	9	0	1
ORR1A2:Shbg	Shbg									chr11	69617585	69646859	NA	NA	NA	ORR1A2	ERVL-MaLR	LTR	-	promoter_tss	0	5.52702	2.44593	6.70812	5.36989	7.26482	27.4786	4.60163e-05	0.000153263	917	0	0	0	0	0	5	2	3	0	0	1	13	12	2	8	6	0	0
B3:Atrx	Atrx									chrX	105911654	105928958	B3	B2	SINE	NA	NA	NA	-	internal	-2.72688	-5.64507	-5.64507	-5.64507	-5.64507	6.22541	17.6038	0.00348629	0.00642295	918	13	9	3	0	1	0	0	0	0	0	0	0	0	0	0	0	0	0
B3:Zfp957	Zfp957							X	X	chr14	79223863	79237535	NA	NA	NA	B3	B2	SINE	-	internal	-0.234003	-5.64516	-5.64516	-5.64516	-5.64516	6.58017	28.5132	2.8885e-05	9.98999e-05	919	13	9	10	4	12	0	0	0	0	0	0	0	0	0	0	0	0	2
L3:Prkg1	Prkg1									chr19	30585302	30586265	L3	CR1	LINE	NA	NA	NA	-	internal	-0.24477	-2.30221	-5.643	-5.643	-5.643	6.64559	23.2082	0.000307987	0.00080336	920	15	7	7	10	9	1	1	0	0	0	0	0	0	0	0	0	0	0
MTA_Mm-int:C2cd5	C2cd5							X	X	chr6	143013348	143015037	NA	NA	NA	MTA_Mm-int	ERVL-MaLR	LTR	-	promoter_tss	-1.44437	-5.64048	-5.64048	-5.64048	-5.64048	6.34413	14.4574	0.0129507	0.0196763	921	17	5	2	9	0	0	0	0	0	0	0	0	0	0	0	0	0	2
ID_B1:Cenpp	Cenpp									chr13	49549054	49627254	ID_B1	B4	SINE	NA	NA	NA	-	internal	-0.45033	-1.82094	-3.11828	-5.63874	-3.62231	6.67823	15.2263	0.00943774	0.0150196	922	19	3	10	10	2	1	1	1	0	1	0	0	0	0	1	0	0	0
MTD:Cenpl	Cenpl									chr1	161080010	161082907	MTD	ERVL-MaLR	LTR	NA	NA	NA	+	internal	0	3.8181	5.73367	7.13287	6.96153	7.83804	35.8122	1.03563e-06	5.05456e-06	923	0	0	0	0	0	1	1	1	1	8	2	17	1	21	16	19	6	0
RSINE1:Csnk1g1	Csnk1g1								X	chr9	65921068	65936796	NA	NA	NA	RSINE1	B4	SINE	+	internal	0	3.27067	3.21866	6.74925	0	6.83687	14.5308	0.0125669	0.0192072	924	0	0	0	0	0	1	0	1	0	0	2	25	0	0	0	0	0	1
L2b:Gm6792	Gm6792									chr7	6263933	6266288	NA	NA	NA	L2b	L2	LINE	+	internal	2.0871	-3.60659	-3.60659	-3.60659	-3.60659	6.4289	16.0378	0.00673689	0.0112099	925	2	3	0	11	22	0	0	0	0	0	0	0	0	0	0	0	0	0
L1M5:Rfwd2	Rfwd2									chr1	159258742	159266756	L1M5	L1	LINE	NA	NA	NA	+	promoter_tss	0	6.81447	0	5.83217	7.06567	7.73546	37.9089	3.9357e-07	2.15778e-06	926	0	0	0	0	0	6	6	15	0	0	0	0	14	2	13	17	12	0
L1M4:Mllt10	Mllt10								X	chr2	18071204	18092783	NA	NA	NA	L1M4	L1	LINE	+	internal	0.349738	-0.912212	1.85999	-0.785456	-0.605044	7.59131	6.09169	0.297399	0.310297	927	11	5	6	13	10	1	3	0	1	26	0	1	1	4	7	1	0	1
Lx3C:Gm2042	Gm2042							X	X	chr12	87955585	87958624	Lx3C	L1	LINE	NA	NA	NA	+	internal	2.78825	0.431529	-2.93586	-2.93586	1.25345	6.62635	12.2234	0.0318512	0.0422411	928	3	0	6	19	8	1	1	0	0	0	0	0	0	0	6	0	0	2
RLTR34B_MM:Clec2f	Clec2f									chr6	129008841	129014115	RLTR34B_MM	ERVK	LTR	NA	NA	NA	+	promoter_tss	5.73071	0	5.63396	0	3.65696	6.81367	14.0301	0.0154193	0.0228001	929	0	0	9	1	23	0	0	0	0	10	0	0	0	0	2	2	0	0
MTB_Mm:Gm5134	Gm5134									chr10	76007817	76008501	MTB_Mm	ERVL-MaLR	LTR	NA	NA	NA	+	promoter_tss	0.541699	-5.19441	-5.19441	-2.17268	-5.19441	6.64931	24.6798	0.000160631	0.000456871	930	11	5	9	15	9	0	0	0	0	0	0	0	2	0	0	0	0	0
Lx3C:Gm10436	Gm10436									chr12	88180944	88181739	Lx3C	L1	LINE	NA	NA	NA	-	internal	1.88564	2.61388	1.77598	-1.70134	-3.85269	7.31549	26.7928	6.25943e-05	0.000200008	931	1	5	10	9	14	6	7	7	3	6	1	0	0	1	0	0	0	0
MIRc:Tmem14c	Tmem14c									chr13	41017268	41017705	MIRc	MIR	SINE	NA	NA	NA	+	internal/promoter_tss	0.731847	0.390893	1.66533	-5.01157	-0.566986	7.48403	14.074	0.0151461	0.0224448	932	7	7	11	12	10	3	5	1	12	7	1	0	0	0	0	7	0	0
B1_Mur1:Paip2	Paip2				X					chr18	35608819	35610870	B1_Mur1	Alu	SINE	NA	NA	NA	+	internal	0	7.17943	7.28549	3.08071	6.1326	7.97493	31.5587	7.26441e-06	2.9771e-05	933	0	0	0	0	0	8	7	20	1	20	13	1	1	0	6	18	0	1
MTEb:Wdyhv1	Wdyhv1									chr15	58150656	58150981	NA	NA	NA	MTEb	ERVL-MaLR	LTR	+	internal	0	0	2.41349	6.53648	6.50741	7.24093	22.2992	0.000459284	0.00113434	935	0	0	0	0	0	0	0	0	0	0	1	0	25	1	10	5	12	0
MLT1L:Dnajc27	Dnajc27									chr12	4113607	4116609	NA	NA	NA	MLT1L	ERVL-MaLR	LTR	+	terminator	0	0	2.39044	6.53593	0	6.66667	17.0344	0.00443498	0.00784868	936	0	0	0	0	0	0	0	0	0	0	1	0	25	1	0	0	0	0
MIRb:Ppp2r2a	Ppp2r2a				X					chr14	67029030	67037937	NA	NA	NA	MIRb	MIR	SINE	-	internal	1.36372	4.43831	6.95946	6.74576	0	7.52683	34.6094	1.80035e-06	8.29215e-06	937	0	0	0	1	0	1	1	3	1	11	16	1	21	9	0	0	0	1
L2b:Gm6792	Gm6792									chr7	6266345	6266829	L2b	L2	LINE	NA	NA	NA	+	internal	2.71832	-2.93458	-2.93458	-2.93458	-2.93458	6.38331	12.92	0.0241401	0.0334461	938	3	0	0	19	13	0	0	0	0	0	0	0	0	0	0	0	0	0
RMER19B:Chst7	Chst7							X	X	chrX	20078292	20089780	RMER19B	ERVK	LTR	PB1D10	Alu	SINE	+	internal/promoter_tss	-0.997102	-2.24096	-2.25471	-0.701131	-3.44792	6.78601	5.60366	0.346714	0.358276	939	0	21	11	2	1	1	1	0	0	1	1	2	4	2	0	0	1	2
L1Md_F2:Stag3	Stag3			X	X					chr5	138309368	138311733	L1Md_F2	L1	LINE	NA	NA	NA	+	internal	0	3.81441	6.39831	5.79086	7.0591	7.66711	42.8102	4.03721e-08	2.98054e-07	940	0	0	0	0	0	1	1	1	2	4	13	5	6	4	7	24	11	2
MTE2b:Mgst1	Mgst1									chr6	138132088	138147658	MTE2b	ERVL-MaLR	LTR	NA	NA	NA	+	promoter	2.72138	0.876683	1.37625	2.26636	-0.828897	6.91352	10.5447	0.061192	0.0735878	941	3	0	1	13	18	1	1	1	1	2	1	3	4	3	0	0	1	0
MTA_Mm:Lrrc49	Lrrc49							X	X	chr9	60621716	60643329	NA	NA	NA	MTA_Mm	ERVL-MaLR	LTR	-	promoter_tss	-3.06148	-5.5914	-5.5914	-5.5914	-5.5914	6.18896	17.6304	0.00344719	0.00637045	942	2	19	1	1	1	0	0	0	0	0	0	0	0	0	0	0	0	2
RMER6A:Arhgap10	Arhgap10									chr8	77310881	77334164	NA	NA	NA	RMER6A	ERVK	LTR	-	promoter_tss	3.21775	-2.44305	-2.44305	-2.44305	-2.44305	6.37003	20.2344	0.00112927	0.0024699	943	2	0	2	12	18	0	0	0	0	0	0	0	0	0	0	0	0	0
MT2C_Mm:Gm3286	Gm3286									chr5	95510875	95517359	MT2C_Mm	ERVL	LTR	NA	NA	NA	+	promoter_tss	0	0	2.42224	6.9129	4.18571	6.97539	24.8862	0.000146562	0.000422139	944	0	0	0	0	0	0	0	0	0	0	1	13	7	13	6	0	0	0
B3A:Tmem80	Tmem80			X						chr7	141331561	141332909	B3A	B2	SINE	NA	NA	NA	+	internal/promoter_tss	-1.68761	-1.68761	-1.68761	-1.68761	5.35697	6.93826	33.6572	2.78598e-06	1.23855e-05	945	1	0	0	0	0	0	0	0	0	0	0	0	0	0	6	19	15	1
PB1:Hmces	Hmces							X	X	chr6	87925810	87932862	NA	NA	NA	PB1	Alu	SINE	+	internal	-0.816662	-2.23874	-5.58664	-3.33175	-5.58664	6.53378	15.4482	0.00860963	0.0139149	946	6	15	11	3	2	1	1	0	0	0	0	1	0	0	0	0	0	2
ID4:Homer1	Homer1							X	X	chr13	93386380	93387523	ID4	ID	SINE	NA	NA	NA	+	internal	-0.832101	1.35388	-3.0469	-3.35527	-5.58529	7.25604	30.6114	1.11759e-05	4.32855e-05	947	7	14	9	6	1	9	8	11	1	0	0	1	0	0	0	0	0	2
MIRc:Mest	Mest							X	X	chr6	30733665	30740669	MIRc	MIR	SINE	NA	NA	NA	+	promoter	-1.406	-2.26389	-0.95878	-0.0378614	-3.48181	6.94395	9.85892	0.0793328	0.0926531	948	7	14	0	7	4	1	1	0	1	3	1	3	5	5	0	0	1	2
LFSINE_Vert:Ptger3	Ptger3									chr3	157641809	157643874	LFSINE_Vert	tRNA	SINE	NA	NA	NA	+	internal	-4.1895	-1.41882	-5.58437	-5.58437	-5.58437	6.30883	21.227	0.000733822	0.00171114	949	8	13	1	0	0	1	1	2	0	0	0	0	0	0	0	0	0	0
RMER12B:Snrpn	Snrpn									chr7	60071988	60097529	RMER12B	ERVK	LTR	NA	NA	NA	-	internal	-1.28849	-5.58096	-5.58096	-5.58096	-5.58096	6.3432	14.4222	0.0131387	0.0199175	950	11	10	1	0	11	0	0	0	0	0	0	0	0	0	0	0	0	0
MT2B:Slc5a11	Slc5a11									chr7	123233104	123235597	MT2B	ERVL	LTR	NA	NA	NA	+	internal	0	2.44276	5.97649	4.77687	7.00996	7.40347	27.001	5.7017e-05	0.000183333	951	0	0	0	0	0	0	1	0	11	0	1	1	1	6	14	17	10	0
LFSINE_Vert:Jmjd6	Jmjd6									chr11	116839931	116840409	LFSINE_Vert	tRNA	SINE	NA	NA	NA	-	internal	1.44221	-4.24291	1.52476	-4.24291	-0.0636705	6.95739	12.3277	0.0305636	0.0408247	952	2	6	8	4	20	0	0	0	0	11	0	0	0	0	2	0	3	0
B1_Mur1:Taf11	Taf11									chr17	27908243	27908769	NA	NA	NA	B1_Mur1	Alu	SINE	-	promoter_tss	-0.0193796	0.428932	0.823875	-3.38697	0.222534	7.67664	5.23247	0.388173	0.398501	953	15	6	19	4	5	2	3	11	0	13	5	0	1	0	0	0	14	0
MTA_Mm:Vps50	Vps50									chr6	3540560	3545509	MTA_Mm	ERVL-MaLR	LTR	NA	NA	NA	+	promoter_tss	-5.57543	-5.57543	-2.23128	-1.36369	-3.45022	6.41524	19.2568	0.00172146	0.00354877	954	16	5	0	0	0	0	0	0	0	1	1	1	2	2	0	0	1	0
L3:Myh14	Myh14									chr7	44608543	44611522	L3	CR1	LINE	NA	NA	NA	-	internal	0	0	2.43705	0	6.99377	6.92429	37.914	3.92627e-07	2.15778e-06	955	0	0	0	0	0	0	0	0	0	0	1	0	0	0	13	12	14	0
B1_Mus1:Dnajc3	Dnajc3							X		chr14	118957530	118957867	B1_Mus1	Alu	SINE	NA	NA	NA	+	promoter_tss	0	7.08002	7.17672	7.12964	6.27944	8.31054	30.3517	1.25746e-05	4.80655e-05	956	0	0	0	0	0	5	9	19	8	15	7	0	10	34	2	7	13	1
B4:Fnbp1l	Fnbp1l							X	X	chr3	122590243	122597767	NA	NA	NA	B4	B4	SINE	-	internal	-3.45243	-5.57139	-5.57139	-5.57139	-5.57139	6.16698	12.7753	0.0255777	0.0351521	957	19	2	2	0	0	0	0	0	0	0	0	0	0	0	0	0	0	2
B1_Mur4:Csad	Csad									chr15	102188962	102190799	NA	NA	NA	B1_Mur4	Alu	SINE	-	promoter_tss	-3.49392	-5.57158	-5.57158	-5.57158	-5.57158	6.16535	16.8422	0.00480903	0.00844562	958	19	2	1	1	0	0	0	0	0	0	0	0	0	0	0	0	0	0
MTA_Mm:Epha3	Epha3									chr16	63568537	63575483	NA	NA	NA	MTA_Mm	ERVL-MaLR	LTR	-	promoter_tss	-3.04275	-5.57028	-5.57028	-5.57028	-5.57028	6.18366	14.3815	0.0133595	0.0202073	959	20	1	1	0	2	0	0	0	0	0	0	0	0	0	0	0	0	0
B3:Zfp958	Zfp958									chr8	4625021	4625839	B3	B2	SINE	NA	NA	NA	+	internal	0	5.22308	7.25091	6.73088	2.16884	7.7043	25.7178	0.000101214	0.000303938	960	0	0	0	0	0	2	1	6	0	8	28	21	2	3	0	0	1	0
Lx3C:Gm10436	Gm10436									chr12	88177649	88180761	NA	NA	NA	Lx3C	L1	LINE	-	internal	3.25303	3.18896	0.0795839	2.02004	-2.45027	6.93225	23.5535	0.000264481	0.000705167	961	1	1	12	7	13	4	4	3	1	0	0	2	1	3	0	0	0	0
B1_Mur3:Ccdc36	Ccdc36									chr9	108425031	108428415	B1_Mur3	Alu	SINE	NA	NA	NA	-	terminator	0	7.35657	4.26217	5.43255	2.11879	7.41488	43.5908	2.80432e-08	2.14788e-07	962	0	0	0	0	0	7	6	28	0	2	2	3	4	5	0	0	1	0
L3b:Mycbp2	Mycbp2							X	X	chr14	103297422	103298666	NA	NA	NA	L3b	CR1	LINE	-	internal	5.72057	4.16348	3.91979	4.17859	6.5594	7.29176	12.6302	0.0271016	0.0369486	963	0	0	15	16	1	1	1	2	1	1	1	1	1	3	0	1	23	2
CR1_Mam:Srsf10	Srsf10							X		chr4	135863830	135867125	NA	NA	NA	CR1_Mam	CR1	LINE	+	terminator	-1.69795	5.54853	-1.69795	-1.69795	-1.69795	7.02287	34.7033	1.72438e-06	7.97819e-06	964	0	1	0	0	0	8	7	22	0	0	0	0	0	0	0	0	0	1
RMER4B:Rps6kb1	Rps6kb1									chr11	86506181	86506790	RMER4B	ERVK	LTR	NA	NA	NA	-	terminator	-1.69867	5.66667	0.893917	-1.69867	4.0065	7.39956	20.9015	0.000845511	0.00194277	965	0	1	0	0	0	6	6	30	1	0	0	0	0	0	0	0	13	0
MIR:Hspa12a	Hspa12a							X	X	chr19	58928962	58931889	MIR	MIR	SINE	NA	NA	NA	-	terminator	0.417814	-0.419848	-1.19932	-0.0270077	0.999737	7.43197	2.51423	0.774351	0.777392	966	11	5	0	23	8	2	2	2	2	1	0	2	4	4	0	2	17	2
MTE2b:Ccnt1	Ccnt1									chr15	98551639	98551913	MTE2b	ERVL-MaLR	LTR	NA	NA	NA	-	terminator	-1.68946	1.57628	5.95325	5.00874	1.20681	7.78501	47.6414	4.20385e-09	4.01723e-08	967	1	0	0	0	0	1	0	1	4	5	38	8	10	11	1	0	1	0
MIRc:Azin2	Azin2									chr4	128934671	128934890	NA	NA	NA	MIRc	MIR	SINE	-	promoter_tss	0	0	6.16682	6.4802	5.87566	7.37962	19.1204	0.00182539	0.00374792	968	0	0	0	0	0	0	0	0	5	0	11	0	24	1	1	4	11	0
L3:Nktr	Nktr									chr9	121730024	121731477	L3	CR1	LINE	NA	NA	NA	+	internal	0	5.0099	7.16397	0	0	7.1288	26.8524	6.09443e-05	0.000195041	969	0	0	0	0	0	1	1	6	0	21	10	0	0	0	0	0	0	0
ID_B1:Mis12	Mis12							X	X	chr11	71020189	71024549	NA	NA	NA	ID_B1	B4	SINE	+	internal	4.69853	7.22149	4.2789	3.06678	0	7.28964	34.2735	2.10038e-06	9.54505e-06	970	0	0	2	1	13	9	6	21	1	1	2	1	1	0	0	0	0	2
ORR1G:Ralyl	Ralyl								X	chr3	13687999	13776824	ORR1G	ERVL-MaLR	LTR	NA	NA	NA	+	internal/promoter	0.643462	-5.0015	-5.0015	-5.0015	-5.0015	6.53872	21.4273	0.000672489	0.0015862	971	13	1	8	13	10	0	0	0	0	0	0	0	0	0	0	0	0	1
RLTRETN_Mm:Cd59b	Cd59b									chr2	104081098	104091003	NA	NA	NA	RLTRETN_Mm	ERVK	LTR	+	terminator	0	5.99889	0	0	6.93456	7.22575	57.7103	3.60943e-11	4.79304e-10	972	0	0	0	0	0	4	3	8	0	0	0	0	0	0	13	9	15	0
B1_Mur1:Fam73a	Fam73a									chr3	152338044	152340251	B1_Mur1	Alu	SINE	NA	NA	NA	-	internal	0	4.64793	7.05674	5.99932	4.56753	7.4757	15.1797	0.00962143	0.0152644	973	0	0	0	0	0	1	1	4	0	23	5	12	0	4	8	0	0	0
ORR1G:Rnf2	Rnf2							X		chr1	151478625	151483730	NA	NA	NA	ORR1G	ERVL-MaLR	LTR	-	internal	-2.44119	-2.44119	4.78338	2.99853	1.72647	7.33401	11.6851	0.0393662	0.0508552	974	2	0	0	0	0	0	0	0	0	19	14	10	0	0	6	0	0	1
ORR1A1:Gtdc1	Gtdc1							X	X	chr2	44860326	44871761	NA	NA	NA	ORR1A1	ERVL-MaLR	LTR	-	promoter_tss	0	7.23684	0	0	0	7.00711	40.4334	1.22106e-07	7.8278e-07	975	0	0	0	0	0	8	6	23	0	0	0	0	0	0	0	0	0	2
RLTR20C2_MM:Abhd3	Abhd3			X						chr18	10693923	10704547	RLTR20C2_MM	ERVK	LTR	NA	NA	NA	-	terminator	-3.48001	-2.13418	1.21104	-5.52138	0.16787	7.28968	10.2402	0.0687078	0.0813593	976	3	17	0	2	0	1	1	0	19	0	1	0	0	0	18	0	0	1
ID_B1:Dlg2	Dlg2								X	chr7	92181021	92266607	NA	NA	NA	ID_B1	B4	SINE	+	terminator	-0.825518	-5.52005	-5.52005	-5.52005	-5.52005	6.39501	16.3174	0.00599396	0.0101639	977	4	16	2	0	14	0	0	0	0	0	0	0	0	0	0	0	0	1
RSINE1:Brip1	Brip1									chr11	86195167	86197868	RSINE1	B4	SINE	NA	NA	NA	-	terminator	-1.69049	4.94049	4.92477	5.13718	5.09928	8.11034	45.1337	1.36286e-08	1.14694e-07	978	1	0	0	0	0	5	4	15	3	4	15	8	11	13	8	10	15	0
B3:Cyct	Cyct									chr2	76356272	76362254	NA	NA	NA	B3	B2	SINE	-	internal	-0.829977	-5.51753	-5.51753	-5.51753	-5.51753	6.39268	18.5843	0.00229662	0.00451595	979	6	14	11	2	2	0	0	0	0	0	0	0	0	0	0	0	0	0
MIR:Uchl3	Uchl3									chr14	101668576	101674135	NA	NA	NA	MIR	MIR	SINE	+	internal	-2.63967	0.231181	-2.10707	-5.51596	-2.69314	6.7481	19.6992	0.00142296	0.00299378	980	7	13	1	2	1	4	4	4	1	1	0	0	0	0	2	0	0	0
L1M5:2210013O21Rik	2210013O21Rik									chrX	153728939	153741039	L1M5	L1	LINE	MamRep605	LTR?	LTR?	+	internal/terminator	-1.77113	-5.51518	-5.51518	-5.51518	-5.51518	6.25896	11.8743	0.0365516	0.0477928	981	8	12	0	8	0	0	0	0	0	0	0	0	0	0	0	0	0	0
MTA_Mm:Gm28802	Gm28802									chr1	58855156	58872424	NA	NA	NA	MTA_Mm	ERVL-MaLR	LTR	-	promoter_tss	-3.44018	-5.51388	-5.51388	-5.51388	-5.51388	6.14943	18.1969	0.00270953	0.00524219	982	9	11	1	0	1	0	0	0	0	0	0	0	0	0	0	0	0	0
B1_Mus2:Pdlim3	Pdlim3								X	chr8	45917016	45917457	B1_Mus2	Alu	SINE	NA	NA	NA	+	promoter_tss	0	5.42939	5.44109	6.68261	6.92984	7.75944	40.2398	1.336e-07	8.45857e-07	983	0	0	0	0	0	2	3	5	3	3	3	3	6	22	6	9	20	1
B2_Mm1a:Pex14	Pex14									chr4	148983172	148984036	B2_Mm1a	B2	SINE	NA	NA	NA	-	terminator	0	5.58454	5.96495	5.96614	6.87974	7.67926	39.6471	1.75919e-07	1.0581e-06	984	0	0	0	0	0	3	3	5	6	2	5	4	3	11	21	5	11	0
MT2B2:Fbxo15	Fbxo15			X	X					chr18	84934636	84934988	NA	NA	NA	MT2B2	ERVL	LTR	+	internal	0	0	3.24948	6.66783	4.57256	6.91908	21.6385	0.000613246	0.00147021	985	0	0	0	0	0	0	0	0	0	0	2	7	14	7	8	0	0	2
MLT1G3:Trim37	Trim37								X	chr11	87218330	87250590	NA	NA	NA	MLT1G3	ERVL-MaLR	LTR	+	terminator	0	4.77414	0	7.09038	6.84804	7.65134	36.4379	7.76237e-07	3.90026e-06	986	0	0	0	0	0	2	2	2	0	0	0	5	9	27	1	29	7	1
Lx3A:Pcdha1	Pcdha1									chr18	37052565	37156154	Lx3A	L1	LINE	NA	NA	NA	+	internal	-5.50012	-5.50012	-2.96276	-2.39174	-5.50012	6.23105	11.2558	0.046537	0.0588184	987	20	0	0	0	0	0	0	0	0	1	0	1	1	0	0	0	0	0
L1MD2:Arhgap29	Arhgap29							X		chr3	121997496	122002541	L1MD2	L1	LINE	NA	NA	NA	+	promoter	-0.719624	-2.15739	-1.18311	0.0452554	-3.36864	6.96835	6.73553	0.241064	0.254636	988	20	0	2	2	13	1	1	0	1	2	1	3	5	5	0	0	1	1
RSINE1:Ipo11	Ipo11	X			X					chr13	106838871	106842088	RSINE1	B4	SINE	NA	NA	NA	-	terminator	2.87717	3.87932	6.6654	2.13436	6.89688	7.49623	30.0984	1.41051e-05	5.30238e-05	989	0	0	1	3	0	1	2	0	10	9	1	0	0	1	23	13	4	2
MIR3:Pdxdc1	Pdxdc1									chr16	13834846	13837042	MIR3	MIR	SINE	NA	NA	NA	-	terminator	-1.69724	3.07802	4.97415	-1.69724	5.18238	7.50217	28.939	2.38358e-05	8.44786e-05	990	0	1	0	0	0	2	2	2	16	0	4	0	0	0	16	3	16	0
B1_Mm:Pla1a	Pla1a									chr16	38415495	38417059	NA	NA	NA	B1_Mm	Alu	SINE	-	internal	0	0	6.10238	6.08491	6.92044	7.55276	33.178	3.46924e-06	1.52572e-05	991	0	0	0	0	0	0	0	0	9	0	5	2	13	4	9	11	16	0
MTE2a:Ppip5k2	Ppip5k2							X	X	chr1	97755971	97756843	MTE2a	ERVL-MaLR	LTR	NA	NA	NA	-	internal	0.237479	2.87022	-1.49898	1.8262	-1.25387	7.39609	11.7099	0.0389863	0.0505561	992	0	7	1	10	1	11	8	8	1	0	0	11	0	4	0	2	0	2
MT2B1:LOC106029237	LOC106029237									chr13	119912780	119913329	NA	NA	NA	MT2B1	ERVL	LTR	-	promoter_tss	2.50653	7.13933	2.55345	4.15421	3.00123	7.15106	28.78	2.56091e-05	9.04502e-05	993	0	0	0	1	2	7	8	19	1	0	0	1	0	4	0	0	2	0
Lx9:Cldn34b2	Cldn34b2								X	chrX	155135184	155147799	Lx9	L1	LINE	MTB	ERVL-MaLR	LTR	-	internal/promoter_tss	0.575547	-1.65927	-5.02329	-5.02329	-5.02329	6.59859	17.0939	0.00432507	0.00768442	994	0	14	8	10	12	1	1	0	0	0	0	0	0	0	0	0	0	1
B3:Mettl6	Mettl6									chr14	31481453	31482790	B3	B2	SINE	NA	NA	NA	-	terminator	0	5.15486	7.05302	3.40369	4.85155	7.28276	20.355	0.0010718	0.00236698	995	0	0	0	0	0	2	3	3	24	0	1	0	0	3	2	1	5	0
B3:Caprin2	Caprin2									chr6	148887790	148890608	B3	B2	SINE	NA	NA	NA	-	internal	-2.94247	4.14078	1.94087	2.04508	-2.94247	7.27317	42.0423	5.7754e-08	4.05866e-07	996	2	1	0	0	0	8	8	16	3	1	2	2	1	6	0	0	0	0
B3:Akap7	Akap7							X	X	chr10	25220758	25236475	NA	NA	NA	B3	B2	SINE	-	promoter_tss	0.318461	1.03989	-3.61069	-0.164628	3.29594	7.1766	10.693	0.057819	0.0703445	997	1	4	2	7	0	1	1	4	0	0	0	0	1	2	0	0	30	2
RMER19B:Dennd6a	Dennd6a		X					X	X	chr14	26574182	26592232	RMER19B	ERVK	LTR	NA	NA	NA	+	promoter_tss	2.66223	2.18137	-0.433568	0.10035	-0.857484	6.75253	17.6295	0.00344845	0.00637045	998	1	2	10	11	9	2	2	4	0	1	0	1	1	0	0	0	1	3
MT2B1:Nom1	Nom1									chr5	29446945	29448384	NA	NA	NA	MT2B1	ERVL	LTR	+	terminator	0	2.30762	0	6.86847	5.65717	7.14154	26.0821	8.60229e-05	0.000261392	999	0	0	0	0	0	0	0	1	0	0	0	18	0	13	3	2	9	0
Lx2B2:Gm13103	Gm13103									chr4	143846568	143847635	NA	NA	NA	Lx2B2	L1	LINE	+	internal	2.66865	0.871524	-2.94684	-2.94684	-2.94684	6.47764	21.5501	0.000637384	0.00152095	1000	1	2	12	5	13	1	1	1	0	0	0	0	0	0	0	0	0	0
MTA_Mm:Glce	Glce							X	X	chr9	62088519	62093609	NA	NA	NA	MTA_Mm	ERVL-MaLR	LTR	-	promoter_tss	5.62366	4.99595	2.55618	0	0	6.61447	23.3053	0.000295089	0.00077665	1001	0	0	14	2	14	2	3	2	1	0	0	0	0	0	0	0	0	2
B3:Aasdh	Aasdh									chr5	76902185	76904208	NA	NA	NA	B3	B2	SINE	-	internal	1.36143	0	5.0373	4.85092	6.90857	7.20277	30.6286	1.1089e-05	4.30742e-05	1002	0	0	0	0	1	0	0	0	2	1	4	2	2	4	2	8	23	0
RSINE1:Gabpb2	Gabpb2				X					chr3	95206602	95216213	NA	NA	NA	RSINE1	B4	SINE	-	internal	0	0	2.39883	6.60985	5.58674	7.00617	16.5205	0.00550506	0.00944477	1003	0	0	0	0	0	0	0	0	0	0	1	22	0	1	0	4	9	1
MTD:Rasgrp4	Rasgrp4									chr7	29150291	29150533	NA	NA	NA	MTD	ERVL-MaLR	LTR	+	internal	0	2.51382	2.42307	6.6044	6.50265	7.28347	22.7839	0.000371232	0.000947778	1004	0	0	0	0	0	1	0	0	0	0	1	22	0	1	15	11	4	0
ORR1E:Ttll5	Ttll5									chr12	86024342	86045182	NA	NA	NA	ORR1E	ERVL-MaLR	LTR	+	terminator	0.433593	-1.86122	-2.64978	-5.19583	-5.19583	6.66804	20.9443	0.000829932	0.00190912	1005	10	6	15	7	8	1	1	0	1	0	0	0	0	0	0	0	0	0
RLTR16:Fdx1	Fdx1			X						chr9	51947197	51948576	RLTR16	ERVK	LTR	NA	NA	NA	-	terminator	0.25928	-5.3747	-5.3747	-5.3747	1.34797	7.24742	24.6935	0.000159658	0.00045537	1006	1	17	16	4	10	0	0	0	0	0	0	0	0	0	2	7	20	1
MTA_Mm:Hnmt	Hnmt							X	X	chr2	24003954	24007913	NA	NA	NA	MTA_Mm	ERVL-MaLR	LTR	-	promoter_tss	1.57325	-4.06289	-4.06289	-4.06289	-4.06289	6.4369	22.407	0.000438064	0.00109516	1007	1	6	16	10	4	0	0	0	0	0	0	0	0	0	0	0	0	2
Lx8:Spink2	Spink2									chr5	77209794	77217828	NA	NA	NA	Lx8	L1	LINE	-	promoter_tss	0	6.85946	7.22626	5.36712	5.29119	7.86361	30.7495	1.04969e-05	4.10444e-05	1008	0	0	0	0	0	6	6	16	18	1	12	2	2	8	4	0	7	0
L2:Atxn2l	Atxn2l								X	chr7	126500253	126500722	NA	NA	NA	L2	L2	LINE	-	internal	2.69736	2.01553	-0.423231	-0.754552	-2.94226	6.67689	17.5926	0.00350281	0.00643598	1009	2	1	17	11	2	2	2	3	0	1	0	0	1	0	0	0	0	1
B1_Mus1:Ptrh2	Ptrh2									chr11	86688128	86689558	B1_Mus1	Alu	SINE	NA	NA	NA	+	internal	0	5.55526	6.1962	0	6.8679	7.45613	36.3596	8.04775e-07	4.01406e-06	1010	0	0	0	0	0	3	2	6	6	0	10	0	0	0	13	7	15	0
RLTR31D_MM:Camk2d	Camk2d			X						chr3	126770857	126780359	NA	NA	NA	RLTR31D_MM	ERVK	LTR	+	internal	0	0	0	0	6.87227	6.84782	19.0078	0.00191572	0.00390983	1011	0	0	0	0	0	0	0	0	0	0	0	0	0	0	22	19	0	1
MT2C_Mm:Gm16427	Gm16427									chr5	93485388	93493569	NA	NA	NA	MT2C_Mm	ERVL	LTR	-	promoter_tss	0	3.81971	5.55214	6.97769	6.42516	7.61616	29.2037	2.1149e-05	7.60101e-05	1012	0	0	0	0	0	1	1	1	1	5	4	7	8	22	27	3	0	0
L2c:Cep19	Cep19									chr16	32100111	32102966	NA	NA	NA	L2c	L2	LINE	+	internal	1.89983	0.0852635	4.46236	4.11897	4.32049	7.89997	7.99423	0.156554	0.170475	1013	2	0	5	5	2	1	0	0	8	0	19	22	0	0	24	14	0	0
MTD:Cept1	Cept1									chr3	106525725	106531136	MTD	ERVL-MaLR	LTR	NA	NA	NA	-	terminator	0	0	6.92018	6.97014	4.40387	7.58085	22.0005	0.000523473	0.00127441	1014	0	0	0	0	0	0	0	0	0	23	2	15	0	20	2	1	3	0
AmnSINE1:Xpnpep2	Xpnpep2		X							chrX	48118481	48118670	AmnSINE1	Deu	SINE	NA	NA	NA	+	internal	0	0	6.92041	2.08346	1.99834	6.83361	19.852	0.0013322	0.00282902	1015	0	0	0	0	0	0	0	0	0	23	2	0	0	1	0	1	0	1
MIRc:Usp48	Usp48			X	X					chr4	137619974	137621061	MIRc	MIR	SINE	NA	NA	NA	+	internal/promoter_tss	0	4.82731	7.04031	2.09873	0	7.03983	24.5714	0.000168551	0.000476746	1016	0	0	0	0	0	2	3	1	23	0	2	0	0	1	0	0	0	2
RLTR14-int:Timd2	Timd2			X	X					chr11	46689538	46706934	NA	NA	NA	RLTR14-int	ERV1	LTR	-	promoter_tss	0	0	3.91718	4.1861	6.85897	7.01667	40.0819	1.43766e-07	8.83082e-07	1017	0	0	0	0	0	0	0	0	1	1	1	1	1	3	9	8	17	2
ORR1D1:Pnrc1	Pnrc1							X	X	chr4	33246507	33269055	NA	NA	NA	ORR1D1	ERVL-MaLR	LTR	-	promoter_tss	3.82463	2.12225	0.856229	-1.69648	-1.69648	6.45902	19.0039	0.00191894	0.0039125	1018	0	1	1	15	13	1	1	1	1	0	0	0	0	0	0	0	0	2
B3:Raet1d	Raet1d									chr10	22372358	22373776	NA	NA	NA	B3	B2	SINE	+	terminator	0.614161	-2.40389	-2.47615	0.648261	-2.90659	6.90242	8.27427	0.141754	0.155435	1019	7	6	2	7	20	1	0	0	0	0	1	11	0	0	1	0	0	0
MTA_Mm:Prl8a2	Prl8a2								X	chr13	27345080	27348831	MTA_Mm	ERVL-MaLR	LTR	NA	NA	NA	+	promoter_tss	-3.37419	-5.45256	-2.92062	-2.35566	-5.45256	6.25676	10.315	0.0667865	0.0793138	1020	0	19	1	1	0	0	0	0	0	1	0	1	1	0	0	0	0	1
B3A:Gpr155	Gpr155									chr2	73346320	73348136	B3A	B2	SINE	NA	NA	NA	-	terminator	-5.45211	-2.18551	-1.13324	0.0794194	-3.3104	6.75475	15.3449	0.00898596	0.0144354	1021	0	19	0	0	0	1	0	1	1	2	1	3	4	6	0	0	1	0
RMER19B:Clec2h	Clec2h									chr6	128650473	128670780	RMER19B	ERVK	LTR	NA	NA	NA	+	internal	-5.45067	-1.63246	-1.53274	-0.95689	-5.45067	6.53968	17.6992	0.00334796	0.0062292	1022	1	18	0	0	0	1	1	1	1	1	1	2	2	2	0	0	0	0
L1M3:Arhgap26	Arhgap26						X	X		chr18	38617774	38676717	NA	NA	NA	L1M3	L1	LINE	+	internal	-1.37355	-0.137666	-2.92856	-5.44945	-5.44945	6.6365	17.5981	0.00349467	0.0064268	1023	2	17	3	2	5	3	2	4	0	1	0	0	0	0	0	0	0	2
MT2_Mm:Rplp0	Rplp0			X	X					chr5	115557416	115560740	MT2_Mm	ERVL	LTR	NA	NA	NA	+	promoter_tss	0	0	5.22972	6.42454	2.93884	6.8894	17.6256	0.00345421	0.00637533	1024	0	0	0	0	0	0	0	0	0	0	9	1	21	2	0	1	1	2
MMERVK10C-int:Cldn34c1	Cldn34c1									chrX	123103637	123117453	MMERVK10C-int	ERVK	LTR	Lx5b	L1	LINE	+	internal/terminator/promoter_tss	-1.38798	-5.44479	-5.44479	-5.44479	-5.44479	6.27884	16.83	0.0048338	0.00847781	1025	6	13	1	8	1	0	0	0	0	0	0	0	0	0	0	0	0	0
L3:Osbpl10	Osbpl10									chr9	115109591	115167081	NA	NA	NA	L3	CR1	LINE	+	internal	-2.58856	-5.44223	-2.00516	-1.03567	-0.195637	6.74746	8.50261	0.130625	0.144238	1026	8	11	0	3	1	0	0	0	1	1	0	1	1	4	13	0	0	0
ID_B1:Aamdc	Aamdc									chr7	97550741	97575587	NA	NA	NA	ID_B1	B4	SINE	-	internal/promoter_tss	1.35594	0	0	0	6.85399	6.80796	17.7753	0.00324159	0.00607056	1027	0	0	0	1	0	0	0	0	0	0	0	0	0	0	4	0	26	0
Lx8:Trim11	Trim11									chr11	58987680	58988724	Lx8	L1	LINE	NA	NA	NA	+	internal	-5.43968	-5.43968	-5.43968	-5.43968	-0.716233	6.35644	13.2977	0.0207429	0.0294374	1028	10	9	0	0	0	0	0	0	0	0	0	0	0	0	9	0	0	0
MTA_Mm:Spata7	Spata7									chr12	98649536	98658212	MTA_Mm	ERVL-MaLR	LTR	NA	NA	NA	+	promoter_tss	-1.3779	-2.08518	-5.4397	-2.35846	-5.4397	6.43042	11.692	0.0392612	0.0507838	1029	10	9	2	0	8	1	1	0	0	0	0	1	1	0	0	0	0	0
L2b:Tln1	Tln1			X	X					chr4	43559717	43562129	L2b	L2	LINE	NA	NA	NA	-	terminator	0	3.26702	6.99275	6.6303	6.55467	7.82238	27.321	4.93912e-05	0.000162267	1030	0	0	0	0	0	1	0	1	3	2	25	13	7	6	0	24	6	2
PB1D9:Nlrp4a	Nlrp4a							X	X	chr7	26435985	26437836	NA	NA	NA	PB1D9	Alu	SINE	+	internal	0.350809	-5.20144	-5.20144	-5.20144	-5.20144	6.53935	27.1008	5.45221e-05	0.00017642	1031	6	10	8	9	12	0	0	0	0	0	0	0	0	0	0	0	0	2
Lx3B:Zfp109	Zfp109									chr7	24233996	24234350	Lx3B	L1	LINE	NA	NA	NA	-	terminator	1.49484	-0.738585	-0.148273	0.825452	-1.95557	6.8331	8.62801	0.124853	0.13899	1032	0	7	9	15	5	1	1	0	1	1	1	2	4	2	0	0	1	0
MT2B1:Rpl41	Rpl41	X		X	X					chr10	128548680	128551633	NA	NA	NA	MT2B1	ERVL	LTR	-	promoter_tss	0	2.33169	5.91019	3.07857	6.84548	7.21828	30.7675	1.04114e-05	4.08794e-05	1033	0	0	0	0	0	0	0	1	1	1	12	1	1	0	6	5	21	3
MTEb:Mtf2	Mtf2				X					chr5	108069363	108073306	MTEb	ERVL-MaLR	LTR	NA	NA	NA	+	internal	-0.19676	-2.9927	-2.00407	-1.87707	-0.833138	6.84657	5.51439	0.356371	0.367328	1034	18	1	8	2	13	0	1	0	1	1	0	1	1	1	7	1	0	1
RMER4B:Fam160a1	Fam160a1							X	X	chr3	85741374	85746088	NA	NA	NA	RMER4B	ERVK	LTR	-	promoter_tss	5.57357	0	5.48683	0	0	6.64904	11.6448	0.0399929	0.0515346	1035	0	0	13	0	16	0	0	0	0	9	0	0	0	0	0	0	0	2
MLT1B:Dock9	Dock9								X	chr14	121536109	121545965	MLT1B	ERVL-MaLR	LTR	NA	NA	NA	-	terminator	1.34845	2.64428	0.396847	1.41022	1.55521	7.75226	6.77456	0.237954	0.251611	1036	7	1	14	8	7	6	7	15	1	3	1	3	5	6	3	0	12	1
MLT1-int:Rock2	Rock2									chr12	16974912	16975469	NA	NA	NA	MLT1-int	ERVL-MaLR	LTR	+	internal	4.54366	6.23281	6.54033	6.72204	6.82295	8.08142	23.1777	0.000312159	0.000813205	1037	0	0	5	4	5	5	6	6	6	10	3	14	0	15	17	10	9	0
B4A:Gm1587	Gm1587							X	X	chr14	77797051	77798789	B4A	B4	SINE	NA	NA	NA	-	internal	1.7406	1.53067	-1.29272	-3.84155	-3.84155	6.74667	19.9966	0.00125157	0.00268569	1038	5	1	15	2	12	3	4	2	1	0	0	0	0	0	0	0	0	2
B4:Stk38	Stk38									chr17	28980522	28982031	B4	B4	SINE	NA	NA	NA	-	internal/terminator	0	0	0	6.45463	2.78195	6.64464	20.2414	0.00112584	0.00246503	1039	0	0	0	0	0	0	0	0	0	0	0	0	21	4	1	1	0	0
X8_LINE:Cdadc1	Cdadc1									chr14	59589965	59592460	NA	NA	NA	X8_LINE	CR1	LINE	-	internal	0	6.36682	6.0071	0	6.87325	7.56862	17.7655	0.00325512	0.00608475	1040	0	0	0	0	0	2	4	15	0	13	0	0	0	0	0	10	22	0
B3:Anapc15	Anapc15									chr7	101881402	101897732	B3	B2	SINE	MIRb	MIR	SINE	+	internal/promoter	0	2.34613	4.79738	3.06868	6.82315	7.03459	35.3132	1.30291e-06	6.22535e-06	1041	0	0	0	0	0	0	0	1	1	1	4	1	1	0	9	7	17	0
RMER12C:Ick	Ick									chr9	78157952	78160368	NA	NA	NA	RMER12C	ERVK	LTR	+	internal	4.0428	5.6673	5.96063	6.6107	6.06646	7.68846	10.6788	0.0581338	0.0703445	1042	0	0	0	6	4	5	3	3	7	0	6	20	0	4	1	11	8	0
ID_B1:Zfp78	Zfp78									chr7	6363917	6370958	ID_B1	B4	SINE	Lx7	L1	LINE	+	internal/promoter	0	0	2.38777	6.54702	0	6.64632	16.3124	0.00600649	0.0101683	1043	0	0	0	0	0	0	0	0	0	0	1	21	0	1	0	0	0	0
MIRc:Zfp280d	Zfp280d									chr9	72338864	72339615	NA	NA	NA	MIRc	MIR	SINE	+	terminator	0	2.53892	2.40345	6.54434	5.71696	7.04686	15.0978	0.00995266	0.0157121	1045	0	0	0	0	0	1	0	0	0	0	1	21	0	1	5	13	0	0
MT2C_Mm:Sgk1	Sgk1			X	X					chr10	21986207	21994965	MT2C_Mm	ERVL	LTR	NA	NA	NA	+	promoter_tss	0	4.21633	6.99872	2.14218	4.22817	7.08062	40.1066	1.42122e-07	8.83082e-07	1046	0	0	0	0	0	1	2	1	11	10	5	0	0	1	4	2	0	2
B4A:Lcor	Lcor						X	X		chr19	41555701	41557061	NA	NA	NA	B4A	B4	SINE	+	terminator	0	0	5.5622	0	6.80645	7.06981	27.4272	4.70913e-05	0.00015608	1047	0	0	0	0	0	0	0	0	8	0	1	0	0	0	14	7	13	2
RSINE1:Zbtb37	Zbtb37									chr1	161029741	161030435	NA	NA	NA	RSINE1	B4	SINE	-	promoter_tss	0	2.4479	7.01893	4.30643	2.0122	7.01469	25.1801	0.000128606	0.000374982	1048	0	0	0	0	0	0	1	0	14	7	5	0	0	6	0	1	0	0
MLT1B:Fam149b	Fam149b								X	chr14	20363450	20367845	NA	NA	NA	MLT1B	ERVL-MaLR	LTR	+	internal/terminator	1.39905	-4.06385	2.40758	-4.06385	-4.06385	6.9871	13.1007	0.0224533	0.0314931	1049	1	6	0	13	15	0	0	0	0	18	0	0	0	0	0	0	0	1
ORR1D-int:LOC108168101	LOC108168101									chr13	74610326	74612723	NA	NA	NA	ORR1D-int	ERVL-MaLR	LTR	-	internal/promoter_tss	0	4.56573	6.65082	0	6.80755	7.44582	30.034	1.45231e-05	5.43951e-05	1050	0	0	0	0	0	2	2	1	18	0	1	0	0	0	12	9	13	0
MTA_Mm:Stxbp4	Stxbp4						X	X	X	chr11	90619315	90621252	NA	NA	NA	MTA_Mm	ERVL-MaLR	LTR	-	promoter_tss	2.16337	1.24399	-3.31188	-1.06566	-3.31188	6.55738	17.1219	0.00427424	0.00760072	1051	2	2	2	10	16	2	2	1	0	0	0	1	0	0	0	0	0	3
RLTR10-int:Kdsr	Kdsr									chr1	106731340	106734546	RLTR10-int	ERVK	LTR	NA	NA	NA	-	terminator	0	7.25719	5.59086	3.07271	3.00046	7.35316	36.9867	6.02627e-07	3.13581e-06	1052	0	0	0	0	0	6	4	29	1	1	9	1	1	0	0	0	2	0
ORR1A4-int:Utp14a	Utp14a	X			X					chrX	48263632	48266414	NA	NA	NA	ORR1A4-int	ERVL-MaLR	LTR	+	terminator	0	0	6.2366	5.80417	6.84232	7.49781	20.8246	0.000874265	0.00199317	1053	0	0	0	0	0	0	0	0	5	9	1	0	0	18	2	10	20	2
MT2C_Mm:Wtap	Wtap									chr17	12983512	12994062	NA	NA	NA	MT2C_Mm	ERVL	LTR	-	promoter_tss	0	0	4.99804	3.06826	6.80125	7.03068	39.2187	2.14585e-07	1.261e-06	1054	0	0	0	0	0	0	0	0	1	1	5	1	1	0	14	11	10	0
MT2B2:Atg10	Atg10			X						chr13	91208433	91249539	NA	NA	NA	MT2B2	ERVL	LTR	-	promoter_tss	0	0	6.86081	0	6.55508	7.33232	27.0329	5.62078e-05	0.000181016	1055	0	0	0	0	0	0	0	0	0	22	2	0	0	0	22	4	5	1
MTD:Chek2	Chek2									chr5	110832218	110848388	MTD	ERVL-MaLR	LTR	NA	NA	NA	+	internal	0	4.23415	6.09504	6.5704	6.83408	7.70377	40.6707	1.09355e-07	7.13013e-07	1056	0	0	0	0	0	2	1	1	3	3	9	8	11	7	17	21	1	0
MTA_Mm:Cnnm2	Cnnm2							X	X	chr19	46779694	46853900	MTA_Mm	ERVL-MaLR	LTR	NA	NA	NA	+	promoter_tss	3.04504	-2.45029	0.0701039	1.13721	-2.45029	6.45162	17.9804	0.00297106	0.00565192	1057	1	1	6	11	11	0	0	0	0	1	0	1	2	0	0	0	0	2
PB1D9:Brip1	Brip1									chr11	86103979	86108766	PB1D9	Alu	SINE	NA	NA	NA	-	internal/terminator	0.822107	-1.35873	-2.16049	-1.62261	-0.911632	6.7182	9.46839	0.0917779	0.105558	1058	6	5	6	13	9	1	1	0	0	1	0	1	1	0	0	3	1	0
MIR3:Cep63	Cep63									chr9	102619760	102621695	NA	NA	NA	MIR3	MIR	SINE	-	internal	0	0	5.04835	6.50269	0	6.82692	9.96101	0.0763476	0.0895759	1059	0	0	0	0	0	0	0	0	0	0	8	21	0	0	0	0	0	0
L3:Il2rg	Il2rg									chrX	101265037	101265375	L3	CR1	LINE	NA	NA	NA	-	terminator	0	0	5.90413	3.08806	6.86857	7.21289	28.5517	2.83876e-05	9.85614e-05	1060	0	0	0	0	0	0	0	0	1	1	12	1	1	0	1	20	14	0
B1_Mus1:Med29	Med29							X		chr7	28387024	28387198	NA	NA	NA	B1_Mus1	Alu	SINE	-	internal	0	3.06592	5.53975	2.33063	6.81358	7.12323	11.5181	0.0420219	0.0537429	1061	0	0	0	0	0	0	0	2	1	0	10	1	0	0	0	0	28	1
MTA_Mm:Mei4	Mei4									chr9	82005294	82025518	MTA_Mm	ERVL-MaLR	LTR	NA	NA	NA	+	promoter_tss	-3.32629	-2.90277	-2.03019	-0.483159	-3.24905	6.54111	10.5075	0.0620671	0.0744004	1062	1	17	0	1	1	1	0	0	0	1	1	2	4	2	0	0	1	0
MIRb:Tada3	Tada3									chr6	113376945	113377315	NA	NA	NA	MIRb	MIR	SINE	-	promoter_tss	-4.02102	-5.3738	-5.3738	-0.0907094	-5.3738	6.45076	13.1126	0.0223462	0.0313645	1063	2	16	0	0	1	0	0	0	0	0	0	9	0	0	0	0	0	0
ID:Cfap221	Cfap221								X	chr1	119969908	119981713	ID	ID	SINE	NA	NA	NA	-	terminator	-1.62012	-1.55428	-1.0551	0.16106	-3.24827	6.86889	7.18811	0.207022	0.221191	1064	3	15	0	8	0	1	1	1	1	2	1	3	4	6	0	0	1	1
MT2B2:Gm6902	Gm6902						X			chr7	23275263	23278740	NA	NA	NA	MT2B2	ERVL	LTR	-	promoter_tss	0	3.82063	3.36796	6.59022	6.34069	7.2959	27.1014	5.45057e-05	0.00017642	1065	0	0	0	0	0	1	1	1	1	0	1	19	0	5	7	10	8	1
MTEa:Rab7	Rab7									chr6	88013698	88015631	NA	NA	NA	MTEa	ERVL-MaLR	LTR	-	internal	0.546279	-1.07921	0.468922	-0.108194	-0.1291	7.24389	1.11317	0.952931	0.952931	1066	5	9	20	2	6	2	1	0	6	0	3	7	0	0	9	1	0	0
MTD:Spdl1	Spdl1						X	X		chr11	34825539	34830021	NA	NA	NA	MTD	ERVL-MaLR	LTR	-	promoter_tss	0	2.45544	6.83936	4.29265	0	6.90362	20.7959	0.000885204	0.00201138	1067	0	0	0	0	0	0	1	0	5	17	1	0	0	6	0	0	0	2
B1_Mus1:Racgap1	Racgap1				X					chr15	99643523	99651506	B1_Mus1	Alu	SINE	NA	NA	NA	-	internal	-5.36682	-0.524202	0.115311	0.149633	-3.36215	7.00666	13.964	0.0158399	0.0233209	1068	7	11	0	0	0	3	2	1	6	0	3	10	0	1	1	0	0	1
ORR1D-int:LOC108168101	LOC108168101									chr13	74611321	74612723	NA	NA	NA	ORR1D-int	ERVL-MaLR	LTR	-	internal/promoter_tss	0	2.45564	6.9347	2.09225	1.98632	6.85582	20.3265	0.00108511	0.0023938	1069	0	0	0	0	0	0	1	0	22	0	1	0	0	1	1	0	0	0
RMER6-int:Slc35a1	Slc35a1								X	chr4	34667510	34668925	RMER6-int	ERVK	LTR	NA	NA	NA	-	terminator	-2.80497	-5.36554	-5.36554	-5.36554	-1.03349	6.32717	11.9288	0.0357771	0.0469302	1070	8	10	2	1	0	0	0	0	0	0	0	0	0	0	0	0	5	1
ORR1B1:Fank1	Fank1							X	X	chr7	133789557	133853165	ORR1B1	ERVL-MaLR	LTR	NA	NA	NA	+	promoter_tss	0.00337554	-0.165325	-1.97068	-0.639741	-1.26226	7.09566	3.55479	0.615113	0.620882	1071	9	9	1	8	17	3	3	2	0	2	0	2	4	1	0	3	2	2
B3:Zfp322a	Zfp322a									chr13	23362654	23362802	B3	B2	SINE	NA	NA	NA	-	internal	-1.76529	-2.0495	-0.789733	-2.31271	-2.52494	6.59703	7.45389	0.189013	0.203223	1072	10	8	2	2	3	1	1	0	1	1	3	1	1	0	0	2	0	0
RSINE1:Leprot	Leprot									chr4	101649312	101652398	RSINE1	B4	SINE	NA	NA	NA	+	promoter_tss	-5.36286	-5.36286	-2.0243	-2.28267	0.548729	6.74834	19.7035	0.00142037	0.00299165	1073	10	8	0	0	0	0	0	0	0	1	1	1	1	0	0	11	7	0
LTR9:Parvb	Parvb			X	X					chr15	84232186	84271230	NA	NA	NA	LTR9	ERV1	LTR	+	internal	0	0	2.4422	5.73855	6.83697	7.16235	33.8434	2.55819e-06	1.14225e-05	1074	0	0	0	0	0	0	0	0	0	0	1	5	8	1	9	25	4	2
L1MA5:Sil1	Sil1									chr18	35430307	35438266	L1MA5	L1	LINE	NA	NA	NA	-	terminator	-3.2896	-5.36158	-0.678262	-2.38617	-5.36158	6.40263	15.521	0.00835345	0.0135578	1075	11	7	1	0	1	0	0	0	4	0	1	0	1	1	0	0	0	0
MuLV-int:Gm42226	Gm42226									chr5	23703360	23710365	MuLV-int	ERV1	LTR	NA	NA	NA	-	terminator	0	6.87875	6.06746	6.47492	5.56617	7.78374	23.3619	0.000287807	0.000759098	1076	0	0	0	0	0	8	8	11	11	0	2	10	0	15	2	6	6	0
MERV1_LTR:Mtf2	Mtf2				X					chr5	108060863	108073306	MERV1_LTR	ERV1	LTR	NA	NA	NA	+	promoter_tss	0	4.31691	6.4931	5.1128	6.87074	7.56445	21.7949	0.00057276	0.00138943	1077	0	0	0	0	0	2	2	0	13	0	5	5	1	3	6	33	1	1
B1_Mus1:Sar1a	Sar1a				X					chr10	61684331	61684879	B1_Mus1	Alu	SINE	NA	NA	NA	+	promoter_tss	0	2.50304	7.22023	0	5.64132	7.28902	31.391	7.84099e-06	3.19419e-05	1078	0	0	0	0	0	1	0	0	15	0	17	0	0	0	7	6	3	1
L3:Nktr	Nktr									chr9	121729680	121729996	NA	NA	NA	L3	CR1	LINE	+	internal	0	4.84195	7.00906	0	0	7.02534	26.663	6.63418e-05	0.000210014	1079	0	0	0	0	0	1	1	5	0	18	10	0	0	0	0	0	0	0
RLTR19B:Ubxn7	Ubxn7								X	chr16	32376024	32379760	NA	NA	NA	RLTR19B	ERVK	LTR	+	internal/terminator	0	7.09751	0	0	0	6.9232	34.0073	2.37303e-06	1.06656e-05	1080	0	0	0	0	0	6	6	22	0	0	0	0	0	0	0	0	0	1
MTA_Mm:Stim2	Stim2									chr5	54074849	54075279	MTA_Mm	ERVL-MaLR	LTR	NA	NA	NA	+	promoter_tss	0.0695015	-2.01053	-1.92921	-1.08211	-3.22133	6.82876	6.98369	0.221856	0.235686	1081	16	2	1	23	3	1	1	0	1	1	0	2	2	1	0	0	1	0
ID_B1:9130011E15Rik	9130011E15Rik									chr19	45910886	45921616	ID_B1	B4	SINE	NA	NA	NA	-	terminator	1.36303	5.17654	7.43491	5.22527	6.13885	7.77464	23.0949	0.00032375	0.000840188	1082	0	0	0	1	0	1	1	7	1	7	33	3	5	2	8	0	12	0
B1_Mur2:Anapc15	Anapc15									chr7	101897046	101897732	B1_Mur2	Alu	SINE	MIRb	MIR	SINE	+	internal/promoter	0	0	2.39051	6.29642	3.64876	6.64707	13.0939	0.0225144	0.0315572	1083	0	0	0	0	0	0	0	0	0	0	1	0	21	1	0	0	3	0
MIRb:2310022A10Rik	2310022A10Rik									chr7	27553353	27556413	NA	NA	NA	MIRb	MIR	SINE	+	internal	-1.6875	1.68202	3.22436	5.00526	-1.6875	6.97136	21.4906	0.000654157	0.00154832	1084	1	0	0	0	0	1	1	0	4	0	2	17	0	10	0	0	0	0
B2_Mm2:Pramel6	Pramel6				X					chr2	87506629	87506899	NA	NA	NA	B2_Mm2	B2	SINE	+	internal	0	3.94286	5.6468	6.6931	3.29977	7.15562	18.6248	0.0022572	0.0044642	1085	0	0	0	0	0	2	1	0	7	0	3	17	0	10	1	2	0	1
L1M3de:Bspry	Bspry							X	X	chr4	62481859	62482617	L1M3de	L1	LINE	NA	NA	NA	+	internal	0	7.18742	6.47584	5.71218	3.01464	7.68671	30.6264	1.11003e-05	4.30742e-05	1086	0	0	0	0	0	6	4	27	1	2	18	5	6	3	0	0	2	2
B1_Mur4:Mutyh	Mutyh			X						chr4	116810941	116814318	B1_Mur4	Alu	SINE	NA	NA	NA	+	internal/promoter_tss	0	0	4.98756	6.36739	4.90692	6.97394	25.0178	0.000138234	0.000399278	1087	0	0	0	0	0	0	0	0	1	1	5	2	18	3	4	6	0	1
MT2_Mm:Zfp809	Zfp809									chr9	22233555	22235019	MT2_Mm	ERVL	LTR	NA	NA	NA	+	promoter_tss	0	5.91422	5.18477	5.08831	6.77602	7.46975	37.7943	4.14976e-07	2.251e-06	1088	0	0	0	0	0	4	3	7	1	1	6	3	5	1	14	17	5	0
MT2C_Mm:Ccdc3	Ccdc3								X	chr2	5221114	5228915	MT2C_Mm	ERVL	LTR	NA	NA	NA	+	promoter_tss	5.44155	0	2.52476	3.08017	2.14647	6.4076	15.5842	0.00813726	0.0133232	1089	0	0	6	3	18	0	0	0	0	1	0	1	1	0	0	0	1	1
B3:1700021F05Rik	1700021F05Rik									chr10	43526654	43530597	B3	B2	SINE	NA	NA	NA	-	terminator	0	3.39447	6.88884	4.03833	6.11945	7.33414	12.2766	0.0311887	0.04147	1090	0	0	0	0	0	1	1	0	22	0	0	0	0	5	8	16	0	0
L1M:Ap4e1	Ap4e1							X	X	chr2	127065029	127066541	NA	NA	NA	L1M	L1	LINE	+	internal/terminator	3.9156	6.84097	6.14987	6.32273	6.21188	7.90264	15.3825	0.00884728	0.0142238	1091	0	0	1	5	3	9	7	10	11	0	3	13	0	8	9	3	10	2
L1MD2:Btrc	Btrc			X	X					chr19	45406586	45456532	L1MD2	L1	LINE	NA	NA	NA	+	internal	0	0	0	6.34191	2.79001	6.59202	17.6414	0.00343112	0.00634991	1092	0	0	0	0	0	0	0	0	0	0	0	0	20	3	0	2	0	2
L2c:Cdc5l	Cdc5l			X	X					chr17	45412634	45413121	L2c	L2	LINE	NA	NA	NA	-	internal/terminator	0	3.32847	6.54159	6.03257	6.75585	7.6261	39.4457	1.93143e-07	1.14155e-06	1093	0	0	0	0	0	1	1	0	5	6	9	7	3	8	19	17	1	2
B1_Mus1:Tcfl5	Tcfl5									chr2	180639661	180640300	B1_Mus1	Alu	SINE	NA	NA	NA	-	terminator	0	7.0678	4.31504	6.73104	2.11222	7.56909	47.7379	4.01758e-09	3.87544e-08	1094	0	0	0	0	0	6	6	21	1	2	1	4	5	23	0	0	1	0
MT2B1:Pkd2l2	Pkd2l2							X	X	chr18	34408667	34414462	MT2B1	ERVL	LTR	NA	NA	NA	+	promoter_tss	0.687992	-4.79851	-4.79851	-4.79851	-4.79851	6.46223	21.4171	0.000675477	0.00158959	1095	5	7	14	12	1	0	0	0	0	0	0	0	0	0	0	0	0	2
PB1D11:Tatdn1	Tatdn1									chr15	58926485	58928543	NA	NA	NA	PB1D11	Alu	SINE	-	internal/promoter_tss	0	3.8221	7.06421	6.39249	5.8431	7.66416	24.5891	0.000167229	0.00047366	1096	0	0	0	0	0	1	1	1	13	4	11	11	0	12	0	6	10	0
MTD:Acer1	Acer1				X					chr17	56959239	56974199	NA	NA	NA	MTD	ERVL-MaLR	LTR	-	promoter_tss	0	4.56902	7.08402	2.18959	0	7.0496	28.5575	2.83131e-05	9.84699e-05	1097	0	0	0	0	0	2	2	1	17	0	11	0	1	0	0	0	0	1
Lx7:Zfp78	Zfp78									chr7	6371105	6371305	Lx7	L1	LINE	NA	NA	NA	+	internal/promoter_tss	0	0	0	6.58272	0	6.64136	18.2887	0.00260549	0.00505524	1098	0	0	0	0	0	0	0	0	0	0	0	18	0	6	0	0	0	0
B1_Mur4:Senp8	Senp8								X	chr9	59740032	59750577	B1_Mur4	Alu	SINE	NA	NA	NA	-	internal	1.09706	-4.39513	-4.39513	-4.39513	-4.39513	6.41868	20.499	0.00100695	0.00224153	1099	6	3	16	1	10	0	0	0	0	0	0	0	0	0	0	0	0	1
ORR1D2:Pard3	Pard3							X	X	chr8	127579803	127593060	ORR1D2	ERVL-MaLR	LTR	NA	NA	NA	+	promoter_tss	0.491513	-1.6543	-1.57336	-0.536477	-2.86449	6.81595	6.4632	0.263718	0.277277	1100	14	0	16	2	9	1	1	0	1	1	0	1	3	2	0	0	1	2
MER21B:Nelfcd	Nelfcd									chr2	174423204	174423375	MER21B	ERVL	LTR	NA	NA	NA	+	internal	0	6.11577	6.83905	6.46781	0	7.59523	31.3217	8.092e-06	3.27038e-05	1101	0	0	0	0	0	3	3	11	0	20	4	4	7	15	0	0	0	0
X9_LINE:Ctbp1	Ctbp1									chr5	33267037	33269441	NA	NA	NA	X9_LINE	L1?	LINE	-	internal/promoter_tss	-1.69872	-1.69872	4.39572	4.98414	0.303776	7.15771	18.6025	0.00227881	0.0044939	1102	0	1	0	0	0	0	0	0	0	13	1	0	15	16	0	1	0	0
IAPLTR3-int:Txndc11	Txndc11							X	X	chr16	11106271	11116794	IAPLTR3-int	ERVK	LTR	NA	NA	NA	-	terminator	-4.06309	2.71888	1.71386	1.04716	0.5499	7.43126	14.4331	0.0130801	0.0198434	1103	1	6	0	0	0	7	9	9	1	10	0	2	1	7	0	8	0	2
RMER21A:Prkdc	Prkdc									chr16	15816658	15816750	NA	NA	NA	RMER21A	ERV1	LTR	+	internal	-1.69655	2.12246	5.38045	1.3768	3.07955	7.1887	28.7761	2.56542e-05	9.0453e-05	1104	0	1	0	0	0	1	1	1	1	14	15	1	1	0	2	7	0	0
ORR1F:Vti1a	Vti1a									chr19	55391868	55398842	NA	NA	NA	ORR1F	ERVL-MaLR	LTR	+	terminator	0	0	6.74667	0	6.49776	7.26695	18.4173	0.00246644	0.00481746	1105	0	0	0	0	0	0	0	0	0	21	1	0	0	0	0	20	8	0
MTC:Ahnak	Ahnak									chr19	9031574	9037158	MTC	ERVL-MaLR	LTR	NA	NA	NA	+	promoter_tss	0.255121	-1.75742	-1.6776	-1.51371	-5.10736	6.7023	9.87152	0.0789586	0.0923215	1106	8	7	1	2	23	1	1	0	1	1	0	1	2	0	0	0	0	0
MT2A:Hsd17b6	Hsd17b6							X		chr10	128000676	128007482	MT2A	ERVL	LTR	MLT2B3	ERVL	LTR	-	internal/promoter_tss	0	6.8904	0	0	2.00915	6.81386	40.6273	1.11582e-07	7.24398e-07	1107	0	0	0	0	0	7	7	14	0	0	0	0	0	0	1	0	0	1
PB1D9:Klhl15	Klhl15									chrX	94241995	94251544	NA	NA	NA	PB1D9	Alu	SINE	+	internal	0	2.28302	6.9531	0	0	6.84221	24.295	0.000190523	0.000529374	1108	0	0	0	0	0	0	0	1	0	17	10	0	0	0	0	0	0	0
HAL1:Stx6	Stx6									chr1	155195328	155197340	HAL1	L1	LINE	NA	NA	NA	+	promoter_tss	0.685273	-4.68301	-4.68301	-2.49371	-4.68301	6.44485	16.4985	0.00555608	0.00951607	1109	2	9	1	17	8	0	0	0	0	0	0	0	1	0	0	0	0	0
PB1D11:Sgol1	Sgol1									chr17	53688120	53689210	PB1D11	Alu	SINE	NA	NA	NA	-	internal	1.88577	3.51212	2.99431	2.1844	-3.31579	7.64115	18.5944	0.00228668	0.00450123	1110	1	3	13	1	8	9	6	11	5	4	8	10	0	1	0	0	0	0
MTA_Mm:Hpse	Hpse					X			X	chr5	100685126	100688458	NA	NA	NA	MTA_Mm	ERVL-MaLR	LTR	-	promoter_tss	-3.93787	-5.2947	-5.2947	-5.2947	-0.685065	6.31178	10.4325	0.0638686	0.0763362	1111	1	16	0	1	0	0	0	0	0	0	0	0	0	0	0	0	6	2
ID_B1:Dlg2	Dlg2								X	chr7	92235224	92266607	NA	NA	NA	ID_B1	B4	SINE	+	terminator	-1.0983	-5.29453	-5.29453	-5.29453	-5.29453	6.2652	13.9206	0.016122	0.023702	1112	1	16	2	9	0	0	0	0	0	0	0	0	0	0	0	0	0	1
MTC:Ncor1	Ncor1								X	chr11	62438515	62472557	NA	NA	NA	MTC	ERVL-MaLR	LTR	-	promoter_tss	-0.11282	-5.28879	-5.28879	-5.28879	-5.28879	6.45054	16.6806	0.00514706	0.00891257	1113	5	12	18	2	1	0	0	0	0	0	0	0	0	0	0	0	0	1
MuLV-int:LOC108168162	LOC108168162									chr14	54293533	54299647	MuLV-int	ERV1	LTR	Lx7	L1	LINE	-	internal/promoter_tss	2.09329	-0.835436	0.0358946	-0.238224	-3.30792	6.49553	12.3131	0.0307403	0.0410071	1115	3	1	7	17	2	1	0	0	0	1	1	1	1	0	0	0	0	0
MTD:Dnajc3	Dnajc3							X		chr14	118957663	118957867	MTD	ERVL-MaLR	LTR	NA	NA	NA	+	promoter_tss	0	3.90887	6.93425	6.46171	4.18759	7.46977	17.9945	0.0029533	0.00562861	1116	0	0	0	0	0	1	2	0	19	0	5	0	10	17	5	1	0	1
MT2C_Mm:Cab39	Cab39									chr1	85804293	85818356	MT2C_Mm	ERVL	LTR	NA	NA	NA	+	promoter_tss	0	3.81252	0	6.5415	6.72828	7.36515	56.3367	6.92734e-11	8.90969e-10	1117	0	0	0	0	0	1	1	1	0	0	0	8	7	11	10	17	7	0
B1F:Cep55	Cep55								X	chr19	38055081	38057409	NA	NA	NA	B1F	Alu	SINE	+	internal	-5.28029	-1.45885	-5.28029	-5.28029	-5.28029	6.18245	19.835	0.00134201	0.00284691	1118	11	6	0	0	0	1	1	1	0	0	0	0	0	0	0	0	0	1
MLT1C:St3gal6	St3gal6								X	chr16	58507614	58514092	NA	NA	NA	MLT1C	ERVL-MaLR	LTR	-	promoter_tss	-0.49336	-5.27135	-5.27135	-5.27135	-5.27135	6.36086	13.0382	0.0230238	0.032205	1119	17	0	1	14	2	0	0	0	0	0	0	0	0	0	0	0	0	1
B1_Mur1:LOC102640586	LOC102640586									chr11	95177499	95186602	B1_Mur1	Alu	SINE	NA	NA	NA	-	internal	-5.27207	-2.0416	-1.35312	-0.400816	-3.13192	6.55583	12.8712	0.0246166	0.0339912	1120	17	0	0	0	0	0	1	1	1	1	1	2	3	3	0	0	1	0
RLTR20C1_MM:Zfc3h1	Zfc3h1									chr10	115415340	115415619	RLTR20C1_MM	ERVK	LTR	NA	NA	NA	+	internal	-3.61433	1.93791	3.25385	1.72692	0.0564934	7.38122	15.2143	0.00948482	0.0150828	1121	0	5	0	0	0	3	2	6	0	18	7	8	0	2	2	2	0	0
B1_Mus2:Xylb	Xylb									chr9	119361183	119361336	NA	NA	NA	B1_Mus2	Alu	SINE	+	internal/terminator	0	5.06459	6.89509	2.12594	4.73288	7.16706	28.7663	2.57685e-05	9.06997e-05	1122	0	0	0	0	0	1	2	5	5	13	7	0	0	1	0	1	6	0
ID_B1:Aknad1	Aknad1							X	X	chr3	108757303	108760337	NA	NA	NA	ID_B1	B4	SINE	+	terminator	0	0	0	6.48853	0	6.59087	17.5576	0.00355514	0.00650292	1123	0	0	0	0	0	0	0	0	0	0	0	18	0	4	0	0	0	2
B1_Mur3:Klhl15	Klhl15									chrX	94238157	94241944	B1_Mur3	Alu	SINE	NA	NA	NA	+	internal	0	4.58676	5.06149	6.40691	5.80018	7.26104	10.6167	0.0595324	0.0718558	1124	0	0	0	0	0	1	0	5	0	0	8	19	0	1	4	0	11	0
MT2B:Ggta1	Ggta1							X	X	chr2	35423412	35432513	MT2B	ERVL	LTR	NA	NA	NA	-	internal	0.438533	0.0602189	-2.42847	-2.72591	-0.388298	6.93656	4.97605	0.41881	0.428448	1125	14	0	15	4	7	3	3	1	1	0	0	1	0	0	0	8	0	2
PB1D7:Lrrc23	Lrrc23									chr6	124770875	124771891	NA	NA	NA	PB1D7	Alu	SINE	-	promoter_tss	0	0	3.2678	6.33226	5.84126	6.99708	26.7349	6.42381e-05	0.000204303	1126	0	0	0	0	0	0	0	0	0	0	2	9	10	2	1	5	10	0
MTC:Dnajc11	Dnajc11									chr4	151967970	151968498	MTC	ERVL-MaLR	LTR	NA	NA	NA	+	promoter_tss	2.13336	-3.30783	-0.786275	-0.235791	-1.17711	6.46717	12.5196	0.0283211	0.0383047	1127	3	1	16	2	8	0	0	0	0	1	0	1	1	0	0	0	1	0
L1M5:Mettl16	Mettl16									chr11	74795817	74795981	L1M5	L1	LINE	NA	NA	NA	+	internal	0	0	6.73477	0	1.99538	6.70959	19.3532	0.00165161	0.00342692	1128	0	0	0	0	0	0	0	0	0	20	2	0	0	0	0	1	0	0
PB1D7:Farsb	Farsb									chr1	78465086	78466966	PB1D7	Alu	SINE	NA	NA	NA	-	internal	2.04515	4.97693	6.75509	4.62993	4.43131	7.19692	20.8483	0.000865291	0.00197712	1129	0	0	0	0	2	1	4	2	4	16	2	0	4	3	3	4	0	0
ORR1B1:Xpa	Xpa									chr4	46185696	46186483	NA	NA	NA	ORR1B1	ERVL-MaLR	LTR	-	promoter_tss	0	4.64424	3.22712	6.17055	0	6.71325	14.2778	0.0139379	0.0208967	1130	0	0	0	0	0	1	1	4	0	0	2	0	20	0	0	0	0	0
MTD:Grhl2	Grhl2									chr15	37328388	37333259	NA	NA	NA	MTD	ERVL-MaLR	LTR	+	terminator	0	0	4.7955	3.07151	6.71342	6.96742	35.9288	9.81456e-07	4.80162e-06	1131	0	0	0	0	0	0	0	0	1	1	4	1	1	0	9	19	6	0
L2:Abr	Abr								X	chr11	76440036	76451852	NA	NA	NA	L2	L2	LINE	-	internal	1.36588	3.33081	3.91672	4.89038	6.72315	7.09453	29.9632	1.49969e-05	5.59648e-05	1132	0	0	0	1	0	1	1	0	1	1	1	2	4	2	12	23	1	1
MIRb:Tmem234	Tmem234				X					chr4	129601243	129607086	MIRb	MIR	SINE	NA	NA	NA	+	internal	0	3.2269	0	6.50651	6.60752	7.29051	31.5943	7.14781e-06	2.93519e-05	1133	0	0	0	0	0	0	1	1	0	0	0	0	15	12	19	4	8	1
PB1D11:Cbx1	Cbx1									chr11	96806794	96808183	NA	NA	NA	PB1D11	Alu	SINE	+	terminator	-1.68624	-1.68624	-1.68624	-1.68624	5.02652	6.74334	19.972	0.00126496	0.00270874	1134	1	0	0	0	0	0	0	0	0	0	0	0	0	0	0	14	16	0
MTA_Mm:Fam229b	Fam229b									chr10	39122335	39124392	NA	NA	NA	MTA_Mm	ERVL-MaLR	LTR	-	promoter_tss	1.99417	0.043455	-3.31642	-3.31642	-3.31642	6.36818	15.3253	0.00905919	0.0145416	1135	1	3	1	10	14	1	1	0	0	0	0	0	0	0	0	0	0	0
MT2_Mm:Abcb5	Abcb5									chr12	118919992	118924480	NA	NA	NA	MT2_Mm	ERVL	LTR	-	promoter_tss	0	6.35691	6.70888	4.85484	3.95492	7.40259	20.7606	0.000898896	0.00203796	1136	0	0	0	0	0	4	7	8	5	15	1	0	0	9	4	1	0	0
B1_Mur1:Akt3	Akt3							X	X	chr1	177041353	177043774	B1_Mur1	Alu	SINE	NA	NA	NA	-	terminator	0	2.46041	6.80422	2.08092	0	6.76337	18.3669	0.00252007	0.00490347	1137	0	0	0	0	0	0	1	0	20	0	1	0	0	1	0	0	0	2
RLTR19B:Ubxn7	Ubxn7								X	chr16	32379832	32381261	RLTR19B	ERVK	LTR	NA	NA	NA	+	internal	1.3619	6.975	2.52115	2.18819	0	6.91306	40.0814	1.43798e-07	8.83082e-07	1138	0	0	0	0	1	6	5	20	0	1	0	0	1	0	0	0	0	1
L1MB2:Nrf1	Nrf1									chr6	30076487	30088832	NA	NA	NA	L1MB2	L1	LINE	+	internal	0.936358	-4.39749	-4.39749	-4.39749	-4.39749	6.37204	14.7259	0.0115998	0.0178838	1139	5	4	6	0	19	0	0	0	0	0	0	0	0	0	0	0	0	0
MT2C_Mm:Adtrp	Adtrp			X						chr13	41816272	41835719	NA	NA	NA	MT2C_Mm	ERVL	LTR	-	promoter_tss	0	2.26667	6.72291	0	0	6.70854	18.8569	0.00204377	0.00411134	1140	0	0	0	0	0	0	0	1	0	19	3	0	0	0	0	0	0	1
RSINE1:Clcn5	Clcn5							X	X	chrX	7299966	7316658	RSINE1	B4	SINE	NA	NA	NA	-	internal	0.959233	-4.40498	1.22685	-4.40498	-4.40498	6.74306	17.1446	0.00423358	0.00753496	1141	2	7	11	4	10	0	0	0	0	10	0	0	0	0	0	0	0	2
MT2_Mm:Ppig	Ppig									chr2	69729292	69731745	MT2_Mm	ERVL	LTR	NA	NA	NA	+	promoter_tss	0	4.16389	6.32972	6.51744	4.81798	7.36133	23.651	0.000253336	0.000681673	1142	0	0	0	0	0	1	1	2	0	13	4	1	14	12	1	7	1	0
B3:H2afv	H2afv									chr11	6433837	6437965	NA	NA	NA	B3	B2	SINE	-	internal	0	4.84806	7.04157	2.28178	6.05294	7.41994	22.4585	0.000428271	0.00107462	1143	0	0	0	0	0	3	2	1	14	0	14	1	0	0	15	8	0	0
MIRb:Pla2g16	Pla2g16									chr19	7562033	7574936	MIRb	MIR	SINE	NA	NA	NA	+	promoter_tss	0	0	6.81325	4.18306	6.30935	7.32322	37.4365	4.89607e-07	2.62106e-06	1144	0	0	0	0	0	0	0	0	1	16	7	1	1	3	5	6	12	0
MTA_Mm:Gm13242	Gm13242									chr4	145684932	145696150	MTA_Mm	ERVL-MaLR	LTR	NA	NA	NA	+	promoter_tss	-1.8108	-1.85303	0.17075	-2.24116	-3.05729	6.66549	6.07314	0.299167	0.311698	1145	0	16	2	2	2	1	1	0	7	0	1	0	1	1	0	0	1	0
B3A:Gm35588	Gm35588									chr7	43253867	43257443	NA	NA	NA	B3A	B2	SINE	+	internal	-1.28699	-4.68513	0.276973	1.72889	1.32553	7.33935	10.5799	0.0603763	0.0727147	1146	1	10	2	1	3	0	0	0	5	0	1	0	16	9	10	0	9	0
B1_Mur2:Smim14	Smim14							X	X	chr5	65468501	65531076	NA	NA	NA	B1_Mur2	Alu	SINE	-	promoter_tss	-2.65574	-1.04492	-5.20882	-5.20882	-5.20882	6.26144	15.0976	0.00995325	0.0157121	1147	1	15	2	0	1	1	1	2	0	0	0	0	0	0	0	0	0	2
MIR3:Sltm	Sltm				X					chr9	70559101	70562813	NA	NA	NA	MIR3	MIR	SINE	+	internal/terminator	0	4.83156	6.7513	2.08133	4.17297	7.00716	13.3607	0.0202234	0.0288402	1148	0	0	0	0	0	2	3	1	20	0	0	0	0	1	6	0	0	1
RLTR10-int:D630023F18Rik	D630023F18Rik									chr1	65121438	65127444	NA	NA	NA	RLTR10-int	ERVK	LTR	-	promoter_tss	-2.67492	-5.20779	-5.20779	-5.20779	-0.607926	6.33064	10.7201	0.0572202	0.0702373	1149	2	14	1	2	0	0	0	0	0	0	0	0	0	0	0	0	6	0
MTA_Mm:Lin52	Lin52									chr12	84477157	84529689	MTA_Mm	ERVL-MaLR	LTR	NA	NA	NA	+	promoter_tss	-3.16547	-5.2046	-5.2046	-2.11365	-5.2046	6.15382	12.4539	0.0290709	0.0391119	1150	4	12	0	0	2	0	0	0	0	0	0	1	1	0	0	0	0	0
Lx5:Clvs1	Clvs1							X	X	chr4	9312068	9350646	Lx5	L1	LINE	NA	NA	NA	+	promoter_tss	-2.35344	-5.20437	-1.77642	-1.30069	-3.06645	6.37954	8.49627	0.130923	0.144489	1151	4	12	0	0	4	0	0	0	1	1	0	1	1	2	0	0	1	2
L1M5:2210013O21Rik	2210013O21Rik									chrX	153725841	153728861	NA	NA	NA	L1M5	L1	LINE	+	internal/terminator	-3.15895	-5.20314	-2.78052	-5.20314	-5.20314	6.11368	12.2685	0.031288	0.041548	1152	5	11	0	2	0	0	0	0	0	0	1	0	0	0	0	0	0	0
ORR1E:Ttll5	Ttll5									chr12	86020603	86045182	NA	NA	NA	ORR1E	ERVL-MaLR	LTR	+	internal/terminator	-1.35746	-5.20168	-5.20168	-5.20168	-5.20168	6.19969	12.348	0.0303186	0.0405504	1153	6	10	7	0	1	0	0	0	0	0	0	0	0	0	0	0	0	0
MERVL-int:Papss1	Papss1							X	X	chr3	131567678	131579310	MERVL-int	ERVL	LTR	NA	NA	NA	+	internal	-3.79509	-5.20166	-5.20166	-5.20166	-5.20166	6.0522	13.8593	0.0165284	0.0241432	1154	6	10	1	0	0	0	0	0	0	0	0	0	0	0	0	0	0	2
MERV1_LTR:Mtf2	Mtf2				X					chr5	108060863	108080921	MERV1_LTR	ERV1	LTR	NA	NA	NA	+	promoter_tss	0	0	2.41516	6.22395	5.20242	6.80442	19.0161	0.00190894	0.00389988	1155	0	0	0	0	0	0	0	0	0	0	1	1	17	3	0	11	1	1
B3A:Ccdc171	Ccdc171							X		chr4	83694435	83695995	NA	NA	NA	B3A	B2	SINE	+	internal	-2.27101	-0.980766	-2.65241	-0.780665	-5.19861	6.51354	10.6902	0.0578798	0.0703445	1156	8	8	4	0	0	1	2	1	1	0	0	1	1	4	0	0	0	1
MTD:Rasgrp4	Rasgrp4									chr7	29150638	29151445	MTD	ERVL-MaLR	LTR	NA	NA	NA	+	internal	0	0	2.42273	6.32561	5.76022	6.94414	22.5981	0.000402811	0.00101697	1157	0	0	0	0	0	0	0	0	0	0	1	18	0	1	4	5	7	0
MTA_Mm:Rttn	Rttn								X	chr18	89036440	89036990	MTA_Mm	ERVL-MaLR	LTR	NA	NA	NA	+	promoter_tss	-0.508592	-5.19711	-2.66527	-1.59135	-3.20414	6.49306	7.00197	0.220494	0.234605	1158	9	7	0	16	0	0	0	0	0	1	0	1	2	0	1	0	0	1
MT2B:Slc5a11	Slc5a11									chr7	123228991	123232987	MT2B	ERVL	LTR	MT2B	ERVL	LTR	+	internal/promoter_tss	0	0	5.30203	0	6.6354	6.95138	31.5341	7.34646e-06	3.0047e-05	1159	0	0	0	0	0	0	0	0	5	0	3	0	0	0	8	14	9	0
Lx5c:Pmfbp1	Pmfbp1							X		chr8	109488144	109489837	Lx5c	L1	LINE	L1_Mur2	L1	LINE	+	internal/terminator/promoter_tss	-0.689471	-5.19422	-1.76131	-1.29162	-5.19422	6.50071	11.1744	0.0480292	0.0602945	1160	11	5	0	12	2	0	0	0	1	1	0	1	1	2	0	0	0	1
L1M5:Rnf170	Rnf170							X	X	chr8	26119600	26120439	NA	NA	NA	L1M5	L1	LINE	+	internal	-0.95243	-5.19114	-5.19114	-5.19114	-0.157783	6.53893	13.8989	0.0162648	0.0238948	1161	13	3	6	5	0	0	0	0	0	0	0	0	0	0	2	1	6	2
RLTR14-int:Gprasp1	Gprasp1									chrX	135752017	135778905	RLTR14-int	ERV1	LTR	B1_Mur1	Alu	SINE	+	internal/terminator	-0.377502	-5.19005	-5.19005	-5.19005	-3.17587	6.37885	18.7436	0.00214533	0.0042802	1162	14	2	6	4	7	0	0	0	0	0	0	0	0	0	1	0	0	0
B4:Fnbp1l	Fnbp1l							X	X	chr3	122597867	122619529	B4	B4	SINE	NA	NA	NA	-	internal	-3.77823	-5.18636	-2.7742	-2.99645	-2.99148	6.17155	7.13207	0.211002	0.224974	1163	16	0	1	0	0	0	0	0	0	0	1	0	1	0	0	0	1	2
MT2A:Pot1a	Pot1a									chr6	25798055	25800283	NA	NA	NA	MT2A	ERVL	LTR	-	internal/promoter_tss	0	0	5.27931	6.231	0	6.76917	23.2657	0.000300279	0.000787269	1164	0	0	0	0	0	0	0	0	1	0	8	6	12	2	0	0	0	0
X8_LINE:Cdadc1	Cdadc1									chr14	59592535	59596861	X8_LINE	CR1	LINE	NA	NA	NA	-	internal	0	6.24295	6.38875	4.30382	6.59135	7.60767	18.6428	0.00223988	0.00443422	1165	0	0	0	0	0	2	4	13	2	14	1	0	0	6	2	1	22	0
B4A:Qser1	Qser1							X	X	chr2	104770675	104776171	B4A	B4	SINE	NA	NA	NA	-	terminator	0.344001	-1.57895	-2.39568	-2.72767	-2.00947	6.61094	8.60568	0.125864	0.139871	1166	2	11	2	6	16	1	1	0	0	1	0	0	1	0	0	1	1	2
ORR1A4-int:Senp7	Senp7									chr16	56182507	56184146	ORR1A4-int	ERVL-MaLR	LTR	NA	NA	NA	+	promoter_tss	0	6.89083	2.52191	2.97657	0	6.87532	40.0951	1.42883e-07	8.83082e-07	1167	0	0	0	0	0	6	5	18	0	1	0	0	1	1	0	0	0	0
L1MB2:Atf1	Atf1							X		chr15	100232259	100232732	L1MB2	L1	LINE	NA	NA	NA	+	promoter	0	6.89803	4.59861	6.06481	3.39069	7.36782	46.6832	6.59231e-09	5.99339e-08	1168	0	0	0	0	0	6	5	18	1	2	2	4	6	9	1	1	1	1
MTA_Mm:9230110C19Rik	9230110C19Rik									chr9	8027267	8031553	NA	NA	NA	MTA_Mm	ERVL-MaLR	LTR	-	promoter_tss	1.68722	-0.256251	-3.60267	-3.60267	-3.60267	6.37702	17.4726	0.00368545	0.00668151	1169	3	2	7	12	5	1	1	0	0	0	0	0	0	0	0	0	0	0
MIR:Drc7	Drc7									chr8	95074331	95074852	NA	NA	NA	MIR	MIR	SINE	+	terminator	0	2.2408	0	0	6.59433	6.67658	12.7027	0.0263295	0.0360718	1170	0	0	0	0	0	0	0	1	0	0	0	0	0	0	0	0	24	0
MT2_Mm:Esp24	Esp24						X			chr17	39036802	39038276	MT2_Mm	ERVL	LTR	NA	NA	NA	+	promoter_tss	0	0	6.97612	4.86019	0	7.01804	28.5835	2.7984e-05	9.7491e-05	1171	0	0	0	0	0	0	0	0	3	10	15	6	0	1	0	0	0	1
B2_Mm2:Pxmp4	Pxmp4									chr2	154595570	154596201	B2_Mm2	B2	SINE	NA	NA	NA	-	terminator	0	5.51278	6.80256	2.9747	6.49981	7.52487	30.2954	1.28996e-05	4.92156e-05	1172	0	0	0	0	0	2	2	7	1	15	8	0	1	1	1	11	14	0
Lx8:Prkg1	Prkg1									chr19	30710115	30724159	Lx8	L1	LINE	NA	NA	NA	-	internal/terminator	1.06474	-4.24254	-1.71876	-0.648904	-4.24254	6.48612	13.6009	0.0183537	0.0264879	1173	2	6	10	13	1	0	0	0	0	1	0	1	2	0	0	0	0	0
L1MB8:Tiprl	Tiprl									chr1	165228447	165277747	NA	NA	NA	L1MB8	L1	LINE	-	internal	0	2.46096	6.73351	2.07956	0	6.72629	17.6083	0.0034796	0.00641639	1174	0	0	0	0	0	0	1	0	19	0	1	0	0	1	0	0	0	0
B3:Ccdc126	Ccdc126									chr6	49339332	49339825	B3	B2	SINE	NA	NA	NA	+	internal	0	6.84276	0	0	0	6.77156	30.3523	1.25711e-05	4.80655e-05	1175	0	0	0	0	0	6	5	17	0	0	0	0	0	0	0	0	0	0
L2a:Zdhhc16	Zdhhc16									chr19	41934883	41937602	L2a	L2	LINE	NA	NA	NA	+	internal	1.40435	6.55923	5.42929	5.28516	2.00995	7.1639	15.9282	0.00705205	0.01168	1176	0	0	1	0	0	6	9	6	8	0	0	1	0	11	0	1	0	0
ORR1A2:Nav3	Nav3							X	X	chr10	109770324	109811646	NA	NA	NA	ORR1A2	ERVL-MaLR	LTR	-	promoter_tss	0	0	2.3933	6.08654	0	6.46051	15.7992	0.0074415	0.0122626	1177	0	0	0	0	0	0	0	0	0	0	1	0	18	1	0	0	0	2
ID_B1:Bbs9	Bbs9							X		chr9	22670957	22673366	NA	NA	NA	ID_B1	B4	SINE	+	internal	0.0634105	4.32391	-2.44406	-2.44406	-2.44406	6.78888	32.8271	4.07286e-06	1.7679e-05	1178	2	0	0	2	1	6	6	14	0	0	0	0	0	0	0	0	0	1
RMER15:Zbtb43	Zbtb43							X		chr2	33462357	33464913	RMER15	ERVL	LTR	NA	NA	NA	-	internal	0	0	6.59624	0	0	6.61342	19.8284	0.00134583	0.00285204	1179	0	0	0	0	0	0	0	0	0	18	2	0	0	0	0	0	0	1
MT2B1:Tdpoz1	Tdpoz1						X	X		chr3	93671545	93676194	NA	NA	NA	MT2B1	ERVL	LTR	-	promoter_tss	0	2.46055	6.71509	3.37668	0	6.76612	16.8661	0.00476079	0.00837129	1180	0	0	0	0	0	0	1	0	18	0	2	0	0	3	0	0	0	2
L1M5:Commd8	Commd8			X						chr5	72164854	72165350	L1M5	L1	LINE	NA	NA	NA	-	internal	0	0	2.39239	6.25447	0	6.5096	16.2322	0.00621136	0.0104717	1181	0	0	0	0	0	0	0	0	0	0	1	17	0	1	0	0	0	1
ORR1A2:Ceacam14	Ceacam14									chr7	17789032	17814050	ORR1A2	ERVL-MaLR	LTR	NA	NA	NA	+	promoter_tss	0	0	3.24706	6.32643	2.18539	6.61463	20.2843	0.00110512	0.00242747	1182	0	0	0	0	0	0	0	0	0	0	2	15	1	4	0	0	1	0
B3A:Tatdn3	Tatdn3									chr1	191058024	191058826	B3A	B2	SINE	NA	NA	NA	-	terminator	-1.68792	4.57726	2.76292	4.5415	4.79522	7.5723	17.8258	0.00317281	0.0059636	1183	1	0	0	0	0	4	2	13	0	0	5	16	1	1	7	2	16	0
ID_B1:Armc9	Armc9								X	chr1	86213105	86218847	NA	NA	NA	ID_B1	B4	SINE	+	terminator	2.04424	4.65279	6.82519	0	0	6.93281	24.0018	0.000216936	0.000591511	1184	0	0	0	2	0	1	1	4	0	14	11	0	0	0	0	0	0	1
MIRc:Klc1	Klc1									chr12	111789459	111793648	NA	NA	NA	MIRc	MIR	SINE	+	internal	5.2248	0	0	0	6.28431	6.83492	31.8451	6.37595e-06	2.65017e-05	1186	0	0	6	9	8	0	0	0	0	0	0	0	0	0	10	2	11	0
ID_B1:Bbs9	Bbs9							X		chr9	22673416	22678911	ID_B1	B4	SINE	NA	NA	NA	+	internal	-2.23256	3.12458	-0.196138	1.06456	-1.50526	7.02455	31.8266	6.43008e-06	2.66724e-05	1187	4	1	0	1	0	6	6	13	1	1	0	1	3	3	0	0	1	1
MLT1B:Ccdc34	Ccdc34							X	X	chr2	110032439	110038079	NA	NA	NA	MLT1B	ERVL-MaLR	LTR	+	internal	-1.35109	-5.11051	-5.11051	-5.11051	-5.11051	6.17172	14.4134	0.0131862	0.0199747	1188	6	9	1	6	1	0	0	0	0	0	0	0	0	0	0	0	0	2
B1_Mur2:Kansl1l	Kansl1l									chr1	66778108	66779528	NA	NA	NA	B1_Mur2	Alu	SINE	-	internal	-5.10732	-5.10732	-5.10732	-5.10732	-5.10732	6.00781	14.4552	0.0129622	0.019679	1189	8	7	0	0	0	0	0	0	0	0	0	0	0	0	0	0	0	0
PB1D7:Pter	Pter									chr2	12974453	12978159	PB1D7	Alu	SINE	NA	NA	NA	+	internal	-0.535929	-1.22672	-1.68375	-2.97426	-3.08287	6.5438	6.4551	0.264418	0.277727	1190	8	7	8	6	0	1	2	0	1	1	0	0	0	1	0	1	0	0
MIRc:Mecr	Mecr									chr4	131861232	131861775	MIRc	MIR	SINE	NA	NA	NA	+	internal	0	2.45226	6.31047	2.09985	6.4263	7.13972	20.4824	0.00101424	0.00225116	1191	0	0	0	0	0	0	1	0	14	0	1	0	0	1	24	2	3	0
L1M2:Ccdc171	Ccdc171							X		chr4	83783706	83795199	L1M2	L1	LINE	NA	NA	NA	+	promoter_tss	-0.792656	-0.932636	-2.58724	-0.839858	-2.14196	6.64906	4.59433	0.467363	0.475975	1192	11	4	2	2	8	1	1	2	0	1	0	2	2	1	0	0	2	1
MTA_Mm:Lingo2	Lingo2							X	X	chr4	35890183	35980896	NA	NA	NA	MTA_Mm	ERVL-MaLR	LTR	-	promoter_tss	5.2531	0	0	0	0	6.19555	18.1798	0.00272934	0.00525565	1193	0	0	11	5	7	0	0	0	0	0	0	0	0	0	0	0	0	2
L3:Cog4	Cog4							X		chr8	110852460	110853669	NA	NA	NA	L3	CR1	LINE	+	internal	2.31723	1.87855	2.24087	-2.93705	-0.0245559	6.79317	10.8822	0.0537653	0.0664351	1194	3	0	11	10	2	2	3	1	6	0	1	0	0	0	0	1	1	1
MT2_Mm:Olfr881	Olfr881						X	X		chr9	37979125	37992491	MT2_Mm	ERVL	LTR	NA	NA	NA	+	promoter_tss	0	6.90567	5.02677	4.6802	2.11958	7.17133	36.5925	7.2285e-07	3.68635e-06	1195	0	0	0	0	0	5	4	21	1	2	4	1	4	2	0	0	1	2
ORR1D2:Mcf2	Mcf2									chrX	60150342	60152899	ORR1D2	ERVL-MaLR	LTR	NA	NA	NA	-	terminator	-5.09693	0.48615	-1.72895	-0.0376186	-3.07116	6.80094	17.946	0.00301482	0.00572451	1196	15	0	0	0	0	3	3	5	1	0	1	3	3	3	0	1	0	0
MTA_Mm:Bbs9	Bbs9							X		chr9	22512568	22513979	MTA_Mm	ERVL-MaLR	LTR	NA	NA	NA	+	promoter_tss	1.66155	-0.368285	-0.180051	0.861686	0.936904	6.78821	3.43273	0.63359	0.638272	1197	3	2	13	8	2	0	1	1	1	1	0	1	3	2	0	0	6	1
L2:Mau2	Mau2									chr8	70019874	70022135	L2	L2	LINE	NA	NA	NA	-	internal	0	2.55996	0	6.19697	5.53488	6.85581	12.2668	0.0313091	0.041549	1198	0	0	0	0	0	1	0	0	0	0	0	17	0	0	10	6	0	0
B1_Mur4:Rab3gap1	Rab3gap1									chr1	127891100	127891312	NA	NA	NA	B1_Mur4	Alu	SINE	+	terminator	0	0	4.877	6.19507	6.49987	7.25418	14.6543	0.0119464	0.0183687	1199	0	0	0	0	0	0	0	0	0	0	7	17	0	0	7	16	6	0
ORR1G:Rnmt	Rnmt									chr18	68305118	68305779	ORR1G	ERVL-MaLR	LTR	NA	NA	NA	+	internal	-3.54687	-0.0946088	1.6282	-1.88266	0.566012	7.24929	13.8911	0.0163161	0.0239357	1200	5	8	0	1	0	2	3	1	1	17	1	1	0	1	4	11	0	0
MT2B2:Slc19a3	Slc19a3						X	X	X	chr1	83026380	83028012	NA	NA	NA	MT2B2	ERVL	LTR	-	internal/promoter_tss	0	5.18916	6.5837	4.0866	2.81064	7.00299	26.2286	8.05738e-05	0.000248903	1201	0	0	0	0	0	2	4	2	8	10	1	0	0	5	1	1	0	3
L2:Limk2	Limk2								X	chr11	3352377	3353276	L2	L2	LINE	NA	NA	NA	-	internal	0.342377	0.759257	4.51188	1.18015	4.82712	7.1988	9.8521	0.079536	0.0928374	1202	0	1	0	2	0	0	1	0	0	15	0	0	0	2	13	19	0	1
AmnSINE2:Rps6kb1	Rps6kb1									chr11	86516191	86516743	NA	NA	NA	AmnSINE2	Deu	SINE	-	internal/promoter_tss	0	6.75848	2.40738	5.43175	0	7.02995	19.8651	0.00132469	0.00281601	1203	0	0	0	0	0	7	4	15	0	0	1	10	0	0	0	0	0	0
B1_Mus2:Eci1	Eci1									chr17	24432809	24433132	B1_Mus2	Alu	SINE	NA	NA	NA	+	promoter	0	2.35857	6.38494	5.49017	6.48095	7.38731	40.0246	1.47639e-07	9.0126e-07	1204	0	0	0	0	0	0	0	1	2	3	14	4	6	2	12	8	8	0
ORR1A2:Axdnd1	Axdnd1									chr1	156339077	156345420	NA	NA	NA	ORR1A2	ERVL-MaLR	LTR	-	promoter_tss	0	4.15879	6.77242	5.69152	5.15852	7.3373	14.1694	0.0145682	0.0217301	1205	0	0	0	0	0	1	1	2	0	14	10	12	0	0	1	11	0	0
MT2B2:Ppp1r9a	Ppp1r9a									chr6	5033462	5045935	MT2B2	ERVL	LTR	NA	NA	NA	+	promoter_tss	0	2.31784	3.77906	6.29628	4.90017	6.85421	20.1077	0.00119286	0.00259235	1206	0	0	0	0	0	0	0	1	0	0	3	9	6	6	0	2	6	0
MT2_Mm:Pemt	Pemt			X	X					chr11	59983558	60040104	NA	NA	NA	MT2_Mm	ERVL	LTR	-	promoter_tss	0	4.22086	6.69597	6.55771	5.99741	7.63441	28.5105	2.89197e-05	9.98999e-05	1207	0	0	0	0	0	1	2	1	11	5	5	0	9	20	2	13	5	2
MTE2a:Rbp7	Rbp7									chr4	149453534	149456421	NA	NA	NA	MTE2a	ERVL-MaLR	LTR	-	promoter_tss	0	0	2.40492	6.00957	2.00053	6.45568	15.9277	0.00705367	0.01168	1208	0	0	0	0	0	0	0	0	0	0	1	0	17	1	0	1	0	0
ID_B1:Tctex1d2	Tctex1d2							X	X	chr16	32426241	32426857	ID_B1	B4	SINE	NA	NA	NA	+	internal	2.18649	-2.94696	-0.423999	0.128703	-2.94696	6.33135	13.2827	0.020869	0.0295752	1210	1	2	1	9	12	0	0	0	0	1	0	1	1	0	0	0	0	2
L2b:Caln1	Caln1							X		chr5	130456204	130506063	L2b	L2	LINE	NA	NA	NA	+	promoter_tss	2.69211	0.877221	1.86823	2.98752	-0.340393	6.80555	11.0618	0.0501688	0.0625962	1211	2	0	1	12	9	1	1	0	1	2	1	3	4	5	0	0	1	1
B1F:Gabpb2	Gabpb2				X					chr3	95206602	95208839	NA	NA	NA	B1F	Alu	SINE	-	internal	0	6.71895	5.4059	5.80437	4.89278	7.42743	14.7424	0.0115214	0.017836	1212	0	0	0	0	0	8	3	14	0	1	9	13	0	0	5	5	0	1
Lx8:Npffr2	Npffr2								X	chr5	89581445	89582640	Lx8	L1	LINE	NA	NA	NA	+	promoter_tss	0.34864	-2.33081	-1.37886	-0.528254	-2.67839	6.66629	7.24611	0.202971	0.217317	1213	6	6	2	18	2	1	0	0	1	1	0	2	2	1	0	0	1	1
MT2B:D7Ertd443e	D7Ertd443e							X	X	chr7	134358086	134385532	NA	NA	NA	MT2B	ERVL	LTR	-	promoter_tss	0	3.20406	6.47179	4.66803	0	6.80543	12.1932	0.0322349	0.0427222	1214	0	0	0	0	0	0	1	1	0	18	0	0	0	8	0	0	0	2
MIR3:Tex264	Tex264									chr9	106684995	106685243	NA	NA	NA	MIR3	MIR	SINE	-	promoter_tss	-2.45031	1.33484	4.07684	3.6997	3.96205	7.57178	13.8692	0.0164621	0.0240778	1215	1	1	0	0	0	0	2	1	8	10	0	0	0	23	4	2	17	0
RSINE1:Fdft1	Fdft1									chr14	63178491	63178892	NA	NA	NA	RSINE1	B4	SINE	-	internal/promoter_tss	5.14289	0	0	0	0	6.16285	17.6685	0.00339191	0.00628872	1216	0	0	3	6	13	0	0	0	0	0	0	0	0	0	0	0	0	0
B3:H2afv	H2afv									chr11	6438068	6439375	B3	B2	SINE	NA	NA	NA	-	internal	0	4.50995	6.91891	0	4.76551	7.10505	37.2053	5.44792e-07	2.88076e-06	1217	0	0	0	0	0	2	1	2	4	7	16	0	0	0	6	3	0	0
MTA_Mm:Dpp10	Dpp10								X	chr1	123411834	123418926	NA	NA	NA	MTA_Mm	ERVL-MaLR	LTR	-	promoter_tss	0.638414	-4.53245	-4.53245	-4.53245	-4.53245	6.34083	16.4104	0.00576503	0.0098164	1218	10	0	7	10	5	0	0	0	0	0	0	0	0	0	0	0	0	1
RodERV21-int:1700029F12Rik	1700029F12Rik									chr13	97022600	97030200	RodERV21-int	ERV1	LTR	NA	NA	NA	-	terminator	3.49164	2.13632	-1.6876	-1.6876	-1.6876	6.31344	14.4688	0.0128905	0.0196285	1219	1	0	8	14	0	1	1	1	0	0	0	0	0	0	0	0	0	0
MTEa:Ocm	Ocm									chr5	144025713	144033522	NA	NA	NA	MTEa	ERVL-MaLR	LTR	-	internal	0	4.33776	5.0305	0	6.36898	6.9257	14.8096	0.0112077	0.0174295	1220	0	0	0	0	0	2	2	0	6	0	0	0	0	0	24	5	0	0
MTC:Lpcat1	Lpcat1									chr13	73471834	73484260	MTC	ERVL-MaLR	LTR	NA	NA	NA	+	promoter_tss	3.49166	-1.68929	0.830276	1.37748	-1.68929	6.31077	17.0897	0.00433283	0.00768486	1221	1	0	9	7	6	0	0	0	0	1	0	1	1	0	0	0	0	0
B3A:Cdk5rap1	Cdk5rap1									chr2	154361865	154365961	B3A	B2	SINE	NA	NA	NA	-	terminator	-0.420254	-0.919245	2.09728	2.21005	-0.429338	7.36834	18.3688	0.00251799	0.00490347	1223	6	2	6	2	0	1	1	0	6	4	7	5	7	13	1	1	2	0
MIR3:Ccdc82	Ccdc82						X	X	X	chr9	13249342	13252070	MIR3	MIR	SINE	NA	NA	NA	+	internal/promoter	-5.02402	-5.02402	-5.02402	-5.02402	-5.02402	5.98915	9.01748	0.108369	0.122034	1224	0	14	0	0	0	0	0	0	0	0	0	0	0	0	0	0	0	3
MTA_Mm:Prkar2b	Prkar2b							X	X	chr12	31993783	32011660	NA	NA	NA	MTA_Mm	ERVL-MaLR	LTR	-	promoter_tss	-0.620407	-1.19668	-2.43058	-5.02366	-0.682199	6.57178	4.79875	0.440932	0.450403	1225	0	14	11	0	1	1	1	1	1	0	0	0	0	0	0	0	5	2
MTB:Slc25a26	Slc25a26									chr6	94553113	94592411	MTB	ERVL-MaLR	LTR	NA	NA	NA	+	promoter_tss	-5.02332	-5.02332	-1.6895	-0.814898	-2.85748	6.30509	11.6287	0.0402452	0.0518272	1226	0	14	0	0	0	0	0	0	0	1	1	1	2	2	0	0	1	0
B1_Mur3:Lpcat2	Lpcat2									chr8	92908447	92908795	B1_Mur3	Alu	SINE	NA	NA	NA	+	promoter_tss	-1.6358	-1.67485	-1.10404	-0.36718	-2.88408	6.5818	4.08232	0.537626	0.544819	1227	0	14	1	5	0	1	1	0	1	1	1	1	3	3	0	0	1	0
MTD:Chek2	Chek2									chr5	110832218	110840410	MTD	ERVL-MaLR	LTR	NA	NA	NA	+	internal	-1.69662	2.12268	4.56737	4.73084	2.80145	7.28136	23.3622	0.000287774	0.000759098	1228	0	1	0	0	0	1	1	1	9	0	7	4	8	13	0	1	5	0
MTA_Mm-int:Agk	Agk									chr6	40323561	40329492	MTA_Mm-int	ERVL-MaLR	LTR	NA	NA	NA	+	promoter_tss	-0.030711	-5.01772	-1.60094	-0.502609	-2.12159	6.67497	9.62882	0.0864623	0.0998957	1230	3	11	10	1	8	0	0	0	1	1	0	2	3	1	1	0	1	0
MTB-int:Calr3	Calr3									chr8	72438635	72440889	NA	NA	NA	MTB-int	ERVL-MaLR	LTR	-	promoter_tss	0.0448849	-5.01477	-5.01477	-5.01477	-5.01477	6.37774	22.3962	0.000440143	0.00109767	1231	5	9	10	7	3	0	0	0	0	0	0	0	0	0	0	0	0	0
MIRb:Tada3	Tada3									chr6	113376064	113377315	NA	NA	NA	MIRb	MIR	SINE	-	promoter_tss	-3.64567	-1.19988	-2.49809	-1.46456	-2.91337	6.33893	10.7984	0.0555262	0.0684042	1232	6	8	0	1	0	1	1	1	0	1	0	1	1	1	0	0	1	0
RLTR42:Rapgef5	Rapgef5							X	X	chr12	117593618	117595240	RLTR42	ERVK	LTR	NA	NA	NA	+	promoter_tss	-0.902179	-1.67408	-5.01157	-1.94326	-5.01157	6.35893	11.8163	0.0373928	0.0487059	1233	7	7	6	3	1	1	1	0	0	0	0	1	1	0	0	0	0	2
PB1D10:Cep44	Cep44									chr8	56533135	56538610	PB1D10	Alu	SINE	NA	NA	NA	-	terminator	-3.64953	-5.00987	-5.00987	-5.00987	-5.00987	6.00832	13.8003	0.0169286	0.0246247	1234	8	6	0	1	0	0	0	0	0	0	0	0	0	0	0	0	0	0
L2:Ampd3	Ampd3							X	X	chr7	110768099	110777798	L2	L2	LINE	NA	NA	NA	+	promoter_tss	-0.505255	-2.47935	-5.00812	-5.00812	-5.00812	6.30568	10.889	0.0536264	0.0663035	1235	9	5	0	13	1	1	0	0	0	0	0	0	0	0	0	0	0	2
L1MD2:Btrc	Btrc			X	X					chr19	45406586	45423132	L1MD2	L1	LINE	NA	NA	NA	+	internal	-4.04771	-4.04771	-1.63039	2.05396	0.977485	6.79894	14.5484	0.0124767	0.0190837	1236	6	1	0	0	0	0	0	0	0	0	1	16	0	0	6	1	3	2
MLTR73:Mreg	Mreg			X						chr1	72196941	72198083	MLTR73	ERV1	LTR	NA	NA	NA	-	internal	0	2.54881	2.39544	6.10818	4.58853	6.6848	11.1957	0.0476355	0.0599474	1238	0	0	0	0	0	1	0	0	0	0	1	16	0	0	2	6	0	1
MT2C_Mm:Senp6	Senp6								X	chr9	80061261	80087429	MT2C_Mm	ERVL	LTR	NA	NA	NA	+	promoter_tss	0	6.7713	3.34553	4.70561	2.1202	6.98728	35.9824	9.57547e-07	4.72105e-06	1239	0	0	0	0	0	5	4	18	0	1	1	2	3	2	0	0	1	1
L2:Zcchc8	Zcchc8									chr5	123709485	123710686	NA	NA	NA	L2	L2	LINE	-	promoter_tss	0	0	6.88714	0	2.77662	6.82816	26.4748	7.2172e-05	0.00022562	1240	0	0	0	0	0	0	0	0	1	9	17	0	0	0	2	0	0	0
MTC:Nrf1	Nrf1									chr6	30076462	30088832	MTC	ERVL-MaLR	LTR	L1MB2	L1	LINE	+	internal/promoter_tss	-1.43405	-5.00358	-2.48222	-0.792293	-2.87377	6.38362	8.50737	0.130402	0.144139	1241	12	2	0	3	4	0	0	0	0	1	0	1	2	2	0	0	1	0
MT2A:Pot1a	Pot1a									chr6	25800510	25805874	MT2A	ERVL	LTR	NA	NA	NA	-	internal	1.36052	0	4.14528	6.03483	2.01059	6.57282	17.0911	0.00433025	0.00768486	1242	0	0	0	1	0	0	0	0	0	0	4	7	9	1	0	1	0	0
MTA_Mm:Adgrb3	Adgrb3									chr1	25228547	25254183	NA	NA	NA	MTA_Mm	ERVL-MaLR	LTR	-	promoter_tss	-5.00098	-5.00098	-5.00098	-5.00098	-5.00098	5.98487	11.6921	0.0392587	0.0507838	1243	13	1	0	0	0	0	0	0	0	0	0	0	0	0	0	0	0	0
Lx3_Mus:Cpq	Cpq									chr15	33154248	33155466	Lx3_Mus	L1	LINE	RMER19B	ERVK	LTR	+	internal/terminator	-2.96032	-5.00131	-5.00131	-5.00131	-5.00131	6.02798	12.9304	0.0240395	0.0333401	1244	13	1	0	1	1	0	0	0	0	0	0	0	0	0	0	0	0	0
B4A:Slc4a5	Slc4a5							X		chr6	83287728	83288289	B4A	B4	SINE	NA	NA	NA	+	promoter_tss	-2.92725	-5.00004	-1.66152	-0.79021	-2.85337	6.33729	8.53637	0.129048	0.143037	1245	14	0	1	0	1	0	0	0	0	1	1	1	2	2	0	0	1	1
L2b:Klf3	Klf3									chr5	64826882	64827109	L2b	L2	LINE	NA	NA	NA	+	internal/promoter	0	5.46915	6.61624	0	0	6.92113	27.5646	4.42716e-05	0.000147934	1246	0	0	0	0	0	3	3	4	16	0	3	0	0	0	0	0	0	0
MT2_Mm:Arih2	Arih2			X	X					chr9	108629334	108653572	NA	NA	NA	MT2_Mm	ERVL	LTR	-	promoter_tss	0	2.50514	2.42967	6.00456	4.90934	6.70744	18.5087	0.00237199	0.00464552	1247	0	0	0	0	0	1	0	0	0	0	1	5	11	1	2	8	0	2
L1MA4:Rpp40	Rpp40									chr13	35904563	35911545	NA	NA	NA	L1MA4	L1	LINE	-	promoter_tss	0	6.68652	3.42278	3.83677	2.01553	6.86657	32.7994	4.12482e-06	1.78335e-05	1248	0	0	0	0	0	5	5	15	1	1	0	0	1	3	1	0	0	0
ORR1A3:Arl15	Arl15									chr13	113808104	113922246	ORR1A3	ERVL-MaLR	LTR	NA	NA	NA	+	promoter_tss	3.37539	-1.69721	-1.69721	1.38559	-1.69721	6.23821	15.2439	0.00936932	0.0149223	1249	0	1	2	5	14	0	0	0	0	0	0	1	1	0	0	0	0	0
MTC:Ahnak	Ahnak									chr19	9045716	9046635	NA	NA	NA	MTC	ERVL-MaLR	LTR	+	internal/terminator	1.23097	-0.516658	0.766989	-0.227677	-3.84477	6.62182	9.95688	0.0764663	0.0896638	1250	4	2	2	6	13	1	1	0	2	1	2	2	1	0	0	0	0	0
MIR:Ms4a1	Ms4a1							X	X	chr19	11258836	11265751	NA	NA	NA	MIR	MIR	SINE	-	promoter_tss	1.76551	-3.31189	-3.31189	-1.12323	-3.31189	6.25122	15.9132	0.00709639	0.0117412	1251	2	2	2	13	6	0	0	0	0	0	0	0	1	0	0	0	0	2
RLTR10-int:Esr1	Esr1								X	chr10	4935989	4939211	RLTR10-int	ERVK	LTR	NA	NA	NA	+	promoter_tss	0.294988	-1.4887	-0.881601	0.091896	-2.70853	6.78853	8.38011	0.136494	0.149909	1252	7	5	4	7	10	1	1	0	1	1	1	2	4	2	0	0	1	1
L2c:Ppcs	Ppcs									chr4	119419293	119421367	NA	NA	NA	L2c	L2	LINE	-	promoter_tss	0	6.51057	3.4355	3.55489	5.17124	6.99035	21.7661	0.000580009	0.00140369	1253	0	0	0	0	0	6	6	9	1	1	0	1	1	1	0	12	0	0
L3:Mtss1	Mtss1								X	chr15	58946019	58947325	L3	CR1	LINE	NA	NA	NA	-	internal	5.10257	0	0	0	4.18804	6.32777	12.8325	0.0250003	0.0344512	1254	0	0	7	0	14	0	0	0	0	0	0	0	0	0	4	2	0	1
ID_B1:Mis12	Mis12							X	X	chr11	71019723	71024549	NA	NA	NA	ID_B1	B4	SINE	+	internal	0	0	2.39293	5.92741	0	6.39594	15.0252	0.0102551	0.0161196	1255	0	0	0	0	0	0	0	0	0	0	1	0	16	1	0	0	0	2
MTA_Mm:Serpinc1	Serpinc1							X	X	chr1	160984850	160989378	MTA_Mm	ERVL-MaLR	LTR	NA	NA	NA	+	promoter_tss	0.309758	-4.80046	-4.80046	-4.80046	-4.80046	6.35869	17.9618	0.00299469	0.00569158	1256	4	8	8	2	11	0	0	0	0	0	0	0	0	0	0	0	0	2
ETnERV-int:Nat8f2	Nat8f2						X	X		chr6	85869154	85870051	NA	NA	NA	ETnERV-int	ERVK	LTR	-	internal	0	4.42733	0	0	6.44323	6.74513	23.36	0.000288049	0.000759098	1257	0	0	0	0	0	1	1	3	0	0	0	0	0	0	0	12	13	2
B1_Mur3:Klhl15	Klhl15									chrX	94235420	94238048	NA	NA	NA	B1_Mur3	Alu	SINE	+	internal	0	0	4.11766	6.14663	5.68029	6.93352	12.6727	0.0266467	0.0364501	1258	0	0	0	0	0	0	0	0	0	0	4	15	0	2	1	0	12	0
B1F1:Nrbf2	Nrbf2							X		chr10	67270146	67271221	NA	NA	NA	B1F1	Alu	SINE	-	internal	-1.68531	-1.68531	4.70523	2.97861	-1.68531	6.72637	10.5419	0.0612586	0.0736039	1259	1	0	0	0	0	0	0	0	0	17	0	0	0	8	0	0	0	1
ORR1A2:Rnf111	Rnf111								X	chr9	70432029	70433477	NA	NA	NA	ORR1A2	ERVL-MaLR	LTR	-	promoter_tss	0	5.53472	6.3886	2.09959	3.28771	6.93164	17.6834	0.00337052	0.00625474	1260	0	0	0	0	0	2	3	6	0	17	0	0	0	1	2	1	0	1
B3A:Tmem248	Tmem248								X	chr5	130223017	130229448	B3A	B2	SINE	NA	NA	NA	+	promoter_tss	0	4.48658	5.92364	6.42177	2.78512	7.14117	19.3811	0.00163192	0.00340191	1261	0	0	0	0	0	1	2	2	9	0	3	0	11	15	2	0	0	1
MIRb:Dedd2	Dedd2									chr7	25203931	25205807	NA	NA	NA	MIRb	MIR	SINE	-	internal	0	0	6.44257	2.0931	3.65827	6.66131	18.7276	0.00216003	0.00429277	1262	0	0	0	0	0	0	0	0	0	16	2	0	0	1	2	2	0	0
MT2B2:Dusp10	Dusp10									chr1	184022571	184068851	MT2B2	ERVL	LTR	NA	NA	NA	+	promoter_tss	0	4.7768	6.44206	2.18951	5.26504	7.02611	19.6099	0.00147885	0.00310179	1263	0	0	0	0	0	2	2	2	0	16	2	0	1	0	5	8	0	0
L1Md_F2:Tyms	Tyms			X	X					chr5	30040048	30060945	NA	NA	NA	L1Md_F2	L1	LINE	-	internal	0	0	0	2.8651	6.26219	6.58468	14.7915	0.0112913	0.0175328	1264	0	0	0	0	0	0	0	0	0	0	0	0	0	2	25	2	0	2
L1M4:Pcbp3	Pcbp3						X	X		chr10	76892656	76933128	L1M4	L1	LINE	NA	NA	NA	-	internal	3.48922	-1.687	-1.687	0.502858	-1.687	6.22431	12.4977	0.0285695	0.0386151	1265	1	0	18	2	1	0	0	0	0	0	0	0	1	0	0	0	0	2
MT2_Mm:AI481877	AI481877									chr4	59113977	59138893	NA	NA	NA	MT2_Mm	ERVL	LTR	-	promoter_tss	0	6.54149	4.63426	5.65231	2.01461	7.11722	22.37	0.00044524	0.00110634	1266	0	0	0	0	0	5	6	11	3	0	2	0	13	1	0	1	0	0
B3:Majin	Majin			X	X					chr19	6195780	6196115	NA	NA	NA	B3	B2	SINE	+	internal	0	2.44225	6.51456	4.40192	0	6.76546	28.7394	2.60833e-05	9.15417e-05	1267	0	0	0	0	0	0	1	0	3	12	4	0	3	3	0	0	0	2
MT2C_Mm:Kpna1	Kpna1									chr16	35978850	36000181	MT2C_Mm	ERVL	LTR	NA	NA	NA	+	promoter_tss	0	4.99303	6.55019	2.94225	3.68952	6.94141	31.2876	8.21878e-06	3.31507e-05	1268	0	0	0	0	0	2	3	2	9	6	4	0	0	2	3	1	0	0
MT2_Mm:Epm2a	Epm2a									chr10	11361420	11390810	MT2_Mm	ERVL	LTR	NA	NA	NA	+	promoter_tss	0	0	6.58866	5.95505	6.38817	7.48506	21.7687	0.000579337	0.00140369	1269	0	0	0	0	0	0	0	0	0	8	14	7	8	1	12	17	0	0
RLTR14_RN:Mapk14	Mapk14							X		chr17	28740759	28741787	NA	NA	NA	RLTR14_RN	ERV1	LTR	+	internal	0	5.11418	3.2336	5.85402	4.1761	6.80365	11.1504	0.0484774	0.0607453	1270	0	0	0	0	0	2	2	4	0	0	2	0	16	0	6	0	0	1
B1F2:Fancd2os	Fancd2os									chr6	113598709	113600628	B1F2	Alu	SINE	NA	NA	NA	-	internal	0	0	3.73085	5.85346	1.96658	6.46455	10.2197	0.0692444	0.0818998	1271	0	0	0	0	0	0	0	0	0	0	3	0	16	0	1	0	0	0
L1M5:Commd8	Commd8			X						chr5	72162874	72164754	NA	NA	NA	L1M5	L1	LINE	-	internal	0	0	2.39347	6.08275	0	6.43647	15.7288	0.00766269	0.0126032	1272	0	0	0	0	0	0	0	0	0	0	1	15	0	1	0	0	0	1
PB1D11:Cbx1	Cbx1									chr11	96802822	96808183	NA	NA	NA	PB1D11	Alu	SINE	+	terminator	1.35834	0	2.40845	6.07904	1.9853	6.47911	14.3643	0.0134537	0.0203197	1273	0	0	0	1	0	0	0	0	0	0	1	15	0	1	1	0	0	0
MT2B2:Fez1	Fez1									chr9	36816850	36843661	MT2B2	ERVL	LTR	NA	NA	NA	+	promoter_tss	0	4.51308	4.76888	6.14669	5.70064	7.13613	18.0626	0.00286902	0.00548844	1274	0	0	0	0	0	2	1	2	0	2	4	12	2	4	17	1	0	0
L2b:Tsc22d4	Tsc22d4				X					chr5	137767878	137767960	L2b	L2	LINE	NA	NA	NA	+	promoter	0	6.6772	6.88988	5.03735	2.89828	7.53925	44.9887	1.45856e-08	1.20759e-07	1275	0	0	0	0	0	5	4	16	3	5	19	2	4	3	0	1	1	1
L3:Rbm10	Rbm10									chrX	20644732	20644864	L3	CR1	LINE	NA	NA	NA	+	internal	0	0	6.8377	0	5.0247	6.96782	15.1949	0.0095614	0.0151809	1276	0	0	0	0	0	0	0	0	10	0	15	0	0	0	0	0	8	0
MTD:Cntln	Cntln									chr4	84999554	85004922	MTD	ERVL-MaLR	LTR	NA	NA	NA	+	promoter_tss	-1.68764	1.43347	4.14349	4.26044	3.88312	7.15039	15.0906	0.0099822	0.0157308	1277	1	0	0	0	0	0	0	2	0	9	3	2	13	2	0	12	3	0
PB1D9:Dnajc5	Dnajc5									chr2	181540616	181546370	PB1D9	Alu	SINE	NA	NA	NA	+	internal	0	3.37611	6.49305	2.09992	3.29667	6.71916	17.7335	0.00329958	0.0061575	1278	0	0	0	0	0	1	1	0	16	0	1	0	0	1	1	2	0	0
B4A:Txndc16	Txndc16							X	X	chr14	45182717	45183045	B4A	B4	SINE	NA	NA	NA	-	terminator	2.05972	1.83569	0.981163	1.88823	-0.0262404	6.78953	3.91426	0.561825	0.568497	1280	3	0	1	0	19	2	2	2	1	1	1	1	3	4	0	1	1	2
MTD:Zfp957	Zfp957							X	X	chr14	79214469	79247216	NA	NA	NA	MTD	ERVL-MaLR	LTR	-	promoter_tss	4.99469	0	0	0	0	6.12008	14.9214	0.0107036	0.0167345	1281	0	0	1	2	17	0	0	0	0	0	0	0	0	0	0	0	0	2
MIRc:Klc1	Klc1									chr12	111793699	111794336	MIRc	MIR	SINE	NA	NA	NA	+	internal	5.0036	2.5036	0	0	4.19651	6.34629	13.8291	0.0167322	0.0243714	1282	0	0	2	3	15	1	0	0	0	0	0	0	0	0	5	1	0	0
B1F1:Ppig	Ppig									chr2	69723363	69731490	NA	NA	NA	B1F1	Alu	SINE	+	internal	0.267467	-0.853144	1.97167	2.6146	-0.00120771	6.89002	5.82565	0.323556	0.335363	1283	4	0	0	7	0	0	1	0	1	5	2	0	15	2	1	2	0	0
ID_B1:Mtf2	Mtf2				X					chr5	108078974	108080824	ID_B1	B4	SINE	NA	NA	NA	+	internal	1.19417	2.31368	-0.377817	-2.95307	3.38402	7.0151	12.0352	0.0343092	0.0452077	1284	0	3	9	0	1	4	3	1	1	0	0	0	0	0	14	14	0	1
B3A:Prorsd1	Prorsd1									chr11	29514522	29514916	B3A	B2	SINE	NA	NA	NA	-	internal	-3.60299	2.49522	2.20525	1.59774	2.81066	7.52758	26.2059	8.13939e-05	0.000250679	1285	3	2	0	0	0	4	4	8	1	6	5	2	6	2	2	19	6	0
L1ME1:Dhx36	Dhx36				X					chr3	62468307	62469368	L1ME1	L1	LINE	NA	NA	NA	-	terminator	-3.56108	-1.09399	-4.91802	-4.91802	-0.341791	6.36576	11.0293	0.0508024	0.0632709	1286	1	12	0	0	1	1	1	1	0	0	0	0	0	0	8	0	0	1
ID_B1:Zfyve28	Zfyve28									chr5	34228199	34232153	ID_B1	B4	SINE	NA	NA	NA	-	terminator	-2.87426	-4.91642	-4.91642	-4.91642	-4.91642	6.01078	10.8962	0.0534773	0.0661591	1287	2	11	0	2	0	0	0	0	0	0	0	0	0	0	0	0	0	0
MIRb:Anapc15	Anapc15									chr7	101885937	101897732	NA	NA	NA	MIRb	MIR	SINE	+	internal	5.04424	0	0	0	0	6.13275	16.0687	0.00665065	0.0110844	1288	0	0	8	1	11	0	0	0	0	0	0	0	0	0	0	0	0	0
RLTR4_MM-int:Gm42031	Gm42031									chr8	85127074	85131607	RLTR4_MM-int	ERV1	LTR	RLTR4_MM-int	ERV1	LTR	-	terminator/promoter_tss	0.983813	-4.06004	-4.06004	-4.06004	-4.06004	6.25926	17.5766	0.00352661	0.00647389	1289	2	5	8	1	11	0	0	0	0	0	0	0	0	0	0	0	0	0
ORR1A2-int:R3hdm2	R3hdm2								X	chr10	127399459	127400125	ORR1A2-int	ERVL-MaLR	LTR	NA	NA	NA	+	promoter_tss	-1.26645	-4.91263	-4.91263	-2.72299	-4.91263	6.1597	10.6901	0.057882	0.0703445	1290	4	9	5	2	0	0	0	0	0	0	0	0	1	0	0	0	0	1
MTEa:Rps6ka5	Rps6ka5									chr12	100678589	100726828	NA	NA	NA	MTEa	ERVL-MaLR	LTR	-	promoter_tss	5.06208	0	0	0	0	6.13744	16.636	0.0052444	0.0090581	1291	0	0	10	8	2	0	0	0	0	0	0	0	0	0	0	0	0	0
MTA_Mm:Maob	Maob							X	X	chrX	16771019	16798660	NA	NA	NA	MTA_Mm	ERVL-MaLR	LTR	-	promoter_tss	-1.14308	-4.90371	-4.90371	-4.90371	-4.90371	6.1333	15.5357	0.00830257	0.0134859	1292	9	4	1	6	1	0	0	0	0	0	0	0	0	0	0	0	0	2
L2a:Ccp110	Ccp110							X	X	chr7	118714248	118715359	L2a	L2	LINE	NA	NA	NA	+	internal	-0.908968	-2.4465	1.08753	-4.89979	-4.89979	6.70894	12.3545	0.0302403	0.0404721	1293	11	2	7	0	2	0	1	0	0	12	1	0	0	0	0	0	0	2
PB1D10:Rbm25	Rbm25									chr12	83635481	83639127	PB1D10	Alu	SINE	NA	NA	NA	+	internal	-2.30445	-4.89962	-4.89962	-4.89962	-4.89962	6.03467	9.25632	0.0992668	0.113029	1294	11	2	3	0	0	0	0	0	0	0	0	0	0	0	0	0	0	0
L1MB1:Inadl	Inadl									chr4	98431899	98433890	NA	NA	NA	L1MB1	L1	LINE	+	terminator	-1.76817	-4.8997	-4.8997	-4.8997	-4.8997	6.07106	10.3313	0.0663741	0.0789157	1295	11	2	0	5	0	0	0	0	0	0	0	0	0	0	0	0	0	0
MTC:Cacna2d1	Cacna2d1							X	X	chr5	15959714	16012393	MTC	ERVL-MaLR	LTR	NA	NA	NA	+	promoter_tss	-1.95923	-4.8983	-2.46208	-0.689183	-2.74236	6.31763	6.99929	0.220693	0.234695	1296	12	1	4	0	0	0	0	0	0	0	1	1	2	2	0	0	1	2
B1_Mur4:Rnf14	Rnf14							X	X	chr18	38298395	38299753	B1_Mur4	Alu	SINE	NA	NA	NA	+	internal	0.11462	0.929704	3.82348	3.39939	-2.44267	7.01124	13.3856	0.0200212	0.0285918	1298	2	0	2	0	1	1	1	0	9	0	7	0	15	1	0	0	0	2
B1F:Trmt5	Trmt5									chr12	73285975	73286683	B1F	Alu	SINE	NA	NA	NA	-	internal	1.3487	0	6.30393	3.36194	0	6.56596	10.9006	0.0533865	0.0660868	1299	0	0	0	0	1	0	0	0	0	16	0	0	0	3	0	0	0	0
RMER6A:Iqck	Iqck									chr7	118871275	118872820	RMER6A	ERVK	LTR	NA	NA	NA	+	promoter_tss	0.850647	-4.24497	-1.72267	0.218917	-2.11067	6.54854	9.87767	0.0787767	0.0922454	1300	1	7	16	2	2	0	0	0	0	1	0	1	3	2	0	0	1	0
B3:Edem1	Edem1							X	X	chr6	108851502	108852489	B3	B2	SINE	NA	NA	NA	+	internal	-2.45715	-2.45715	3.24145	0.627497	3.79704	6.94624	22.0602	0.000509982	0.00124601	1301	0	2	0	0	0	0	0	0	1	1	10	1	1	0	9	1	12	2
B4A:Ppp1r9a	Ppp1r9a									chr6	5115480	5116264	NA	NA	NA	B4A	B4	SINE	+	terminator	0	0	0	0	6.22769	6.50959	24.1309	0.000204887	0.000563163	1302	0	0	0	0	0	0	0	0	0	0	0	0	0	0	18	4	3	0
ORR1A4-int:Yipf1	Yipf1									chr4	107321349	107336113	ORR1A4-int	ERVL-MaLR	LTR	NA	NA	NA	+	promoter_tss	0	2.35135	5.95435	5.97799	4.27786	6.98464	30.4998	1.17572e-05	4.53651e-05	1303	0	0	0	0	0	0	0	1	1	3	10	5	9	3	3	2	1	0
RLTR25B:Zfp950	Zfp950			X						chr19	61117288	61127006	RLTR25B	ERVK	LTR	NA	NA	NA	-	terminator	0	2.44037	6.41566	2.1244	3.31455	6.65672	25.976	9.01981e-05	0.000272862	1304	0	0	0	0	0	0	1	0	8	7	2	0	0	1	1	2	0	1
B1_Mus1:Pglyrp1	Pglyrp1									chr7	18873993	18889277	B1_Mus1	Alu	SINE	NA	NA	NA	+	internal	0	6.57213	4.2811	4.8718	2.10796	6.97405	36.8436	6.43774e-07	3.32454e-06	1305	0	0	0	0	0	5	4	14	1	1	2	2	3	3	0	0	1	0
RSINE1:Ggps1	Ggps1							X		chr13	14059450	14063205	RSINE1	B4	SINE	NA	NA	NA	-	internal	-2.9536	0.995049	2.90406	3.13741	1.01058	7.05541	10.7426	0.0567287	0.0697596	1307	0	3	0	0	0	2	1	0	10	0	1	13	0	4	1	4	0	1
LTR78B:Ablim1	Ablim1									chr19	57043061	57043795	NA	NA	NA	LTR78B	ERV1	LTR	-	internal	1.6242	0.03535	0.118157	0.880335	-0.403649	6.56052	3.37785	0.641946	0.646371	1308	4	0	1	3	15	1	1	0	1	1	0	1	1	3	1	0	1	0
L1_Rod:Setd4	Setd4									chr16	93596335	93598316	NA	NA	NA	L1_Rod	L1	LINE	-	internal	0	0	2.39124	5.9892	0	6.39859	14.8282	0.011122	0.0173225	1309	0	0	0	0	0	0	0	0	0	0	1	14	0	1	0	0	0	0
ORR1A0:Zfp951	Zfp951									chr5	104817123	104822206	NA	NA	NA	ORR1A0	ERVL-MaLR	LTR	-	promoter_tss	0	0	2.39227	5.98897	0	6.39859	15.0501	0.0101505	0.0159798	1310	0	0	0	0	0	0	0	0	0	0	1	14	0	1	0	0	0	0
MT2B2:Il1r1	Il1r1							X		chr1	40276177	40277121	NA	NA	NA	MT2B2	ERVL	LTR	+	internal	1.61767	-3.31651	-3.31651	-3.31651	-3.31651	6.17822	15.3202	0.00907843	0.0145611	1311	1	3	2	5	12	0	0	0	0	0	0	0	0	0	0	0	0	1
RMER19C:Aven	Aven				X					chr2	112561657	112625154	RMER19C	ERVK	LTR	NA	NA	NA	+	internal	4.93735	3.33802	3.4212	2.188	0	6.32311	14.7385	0.0115403	0.0178381	1312	0	0	2	7	10	1	1	0	1	1	0	0	1	0	0	0	0	1
MT2C_Mm:Gm3286	Gm3286									chr5	95510875	95519849	MT2C_Mm	ERVL	LTR	NA	NA	NA	+	promoter_tss	0	2.47994	3.86999	6.01091	2.01234	6.56931	24.4327	0.000179248	0.000502052	1313	0	0	0	0	0	1	0	0	1	0	2	3	10	5	1	0	0	0
MT2B1:Gm20767	Gm20767						X	X	X	chr13	120154056	120154598	MT2B1	ERVL	LTR	NA	NA	NA	+	internal/promoter_tss	-2.43655	2.12024	-4.55577	-4.55577	1.25931	7.17515	12.8916	0.0244162	0.0337829	1314	0	10	2	0	0	4	3	19	0	0	0	0	0	0	0	0	14	3
PB1D10:2410002F23Rik	2410002F23Rik				X					chr7	44248295	44249541	NA	NA	NA	PB1D10	Alu	SINE	+	internal	0	0	5.85163	6.04159	6.3467	7.31371	16.3965	0.00579858	0.00986531	1315	0	0	0	0	0	0	0	0	0	10	2	11	0	6	4	24	0	1
L2:Ino80e	Ino80e									chr7	126852991	126853488	NA	NA	NA	L2	L2	LINE	-	internal	3.11917	3.06387	5.43082	0	6.25762	6.90784	8.43905	0.133641	0.147092	1316	0	0	0	0	5	0	0	2	0	7	2	0	0	0	0	0	19	0
B1_Mur2:Zbtb37	Zbtb37									chr1	161013021	161019483	B1_Mur2	Alu	SINE	NA	NA	NA	-	internal	0	2.26936	6.2874	0	0	6.4943	17.3444	0.00389092	0.00699819	1317	0	0	0	0	0	0	0	1	0	15	1	0	0	0	0	0	0	0
ORR1A1:Fbxl13	Fbxl13							X		chr5	21585293	21603649	NA	NA	NA	ORR1A1	ERVL-MaLR	LTR	-	promoter_tss	0	0	6.28746	2.07621	0	6.49088	16.7396	0.00502109	0.00872399	1318	0	0	0	0	0	0	0	0	0	15	1	0	0	1	0	0	0	1
RMER16B2:Dctn4	Dctn4									chr18	60534663	60537829	NA	NA	NA	RMER16B2	ERVK	LTR	+	terminator	0	3.8259	6.2866	6.19025	5.69448	7.36168	15.4194	0.00871298	0.014041	1319	0	0	0	0	0	1	1	1	0	15	1	0	10	12	17	1	0	0
L1MC4:Fam135a	Fam135a							X	X	chr1	24043024	24044113	L1MC4	L1	LINE	NA	NA	NA	-	internal	1.40946	2.45638	6.40685	2.09055	0	6.58538	16.2518	0.00616086	0.0103952	1321	0	0	1	0	0	0	1	0	15	0	1	0	0	1	0	0	0	2
MT2B:Lmbr1l	Lmbr1l									chr15	98905982	98906243	MT2B	ERVL	LTR	NA	NA	NA	-	internal	4.9689	4.95805	3.87933	3.05703	4.78369	6.77779	12.0157	0.034574	0.0454686	1322	0	0	7	4	8	2	2	3	1	0	2	1	1	0	0	4	4	0
Lx7:Cfap53	Cfap53							X		chr18	74356205	74359522	Lx7	L1	LINE	NA	NA	NA	+	promoter_tss	0	3.38148	6.45191	2.88675	0	6.65832	18.8593	0.00204164	0.00411134	1323	0	0	0	0	0	1	1	0	14	0	3	0	0	2	0	0	0	1
ORR1A1:Kctd18	Kctd18									chr1	57967723	57981179	NA	NA	NA	ORR1A1	ERVL-MaLR	LTR	-	promoter_tss	0	6.40934	0	0	0	6.54025	28.2662	3.22866e-05	0.000110597	1324	0	0	0	0	0	5	5	10	0	0	0	0	0	0	0	0	0	0
MT2C_Mm:Pcgf5	Pcgf5									chr19	36382664	36411955	MT2C_Mm	ERVL	LTR	NA	NA	NA	+	promoter_tss	0	6.40133	5.14058	5.51503	0	7.08282	26.6146	6.77938e-05	0.000213948	1325	0	0	0	0	0	4	6	10	1	6	0	1	1	12	0	0	0	0
Lx3C:Gm10436	Gm10436									chr12	88178473	88180761	NA	NA	NA	Lx3C	L1	LINE	-	internal	0.959069	1.80557	1.17348	-4.06656	-4.06656	6.95053	11.9734	0.0351538	0.0461422	1326	0	7	15	1	3	4	5	4	7	0	0	0	0	0	0	0	0	0
RLTR15:Gc	Gc									chr5	89426169	89434579	NA	NA	NA	RLTR15	ERVK	LTR	-	promoter_tss	0	3.96374	2.39647	5.91676	5.64367	6.88482	11.0553	0.0502941	0.0627143	1327	0	0	0	0	0	2	1	0	0	0	1	14	0	0	1	16	0	0
ORR1A2:Cadm1	Cadm1									chr9	47629705	47633925	ORR1A2	ERVL-MaLR	LTR	NA	NA	NA	+	promoter_tss	0	2.31473	3.26101	5.94015	6.02775	6.95271	20.7114	0.000918301	0.00207276	1328	0	0	0	0	0	0	0	1	0	0	2	3	10	4	0	10	9	0
PB1D10:Xrcc6bp1	Xrcc6bp1									chr10	126868725	126891639	PB1D10	Alu	SINE	NA	NA	NA	-	terminator	-0.897316	1.87999	-0.402468	0.604166	3.29934	6.89257	17.2708	0.00401389	0.00717518	1329	1	2	0	1	1	3	2	1	1	0	0	1	1	1	12	14	0	0
ORR1A0:4833420G17Rik	4833420G17Rik									chr13	119463119	119464564	NA	NA	NA	ORR1A0	ERVL-MaLR	LTR	+	internal	-1.93841	-2.28708	1.14699	-0.44123	-4.80842	6.76025	9.03483	0.107683	0.121329	1330	0	12	1	0	3	1	0	0	10	0	2	4	0	1	0	0	0	0
B3A:Gsdmc2	Gsdmc2								X	chr15	63844559	63844694	NA	NA	NA	B3A	B2	SINE	-	internal/promoter_tss	-4.80895	-4.80895	-4.80895	-4.80895	-4.80895	5.94551	8.50603	0.130465	0.144139	1331	0	12	0	0	0	0	0	0	0	0	0	0	0	0	0	0	0	1
PB1D10:Chst7	Chst7							X	X	chrX	20089840	20096964	PB1D10	Alu	SINE	NA	NA	NA	+	internal/promoter_tss	0.13249	-0.986752	-0.888302	-1.72703	-0.608371	6.73623	1.88287	0.865103	0.86595	1332	0	12	13	4	1	1	1	1	1	1	1	1	1	0	6	0	0	2
L2:Dnal4	Dnal4							X	X	chr15	79765853	79775921	NA	NA	NA	L2	L2	LINE	-	internal	-3.45783	-4.80877	-4.80877	-4.80877	-4.80877	5.96789	8.99882	0.109111	0.122803	1333	0	12	0	0	1	0	0	0	0	0	0	0	0	0	0	0	0	2
BGLII:Gm2959	Gm2959									chr14	42422156	42426079	BGLII	ERVK	LTR	NA	NA	NA	+	promoter_tss	-2.76219	-0.985199	-4.80809	-1.72065	-4.80809	6.21005	9.1602	0.102842	0.116517	1334	0	12	0	2	0	1	1	1	0	0	0	1	1	0	0	0	0	0
Lx3B:Prr32	Prr32								X	chrX	45034494	45090894	Lx3B	L1	LINE	NA	NA	NA	+	promoter_tss	-1.24121	-1.45842	-0.887047	-0.149965	-2.66794	6.56585	3.48643	0.625442	0.630685	1335	1	11	0	0	7	1	1	0	1	1	1	1	3	3	0	0	1	1
B3:Ube2w	Ube2w									chr1	16541789	16543948	NA	NA	NA	B3	B2	SINE	-	internal/promoter_tss	-0.450982	-4.80444	-4.80444	-4.80444	-4.80444	6.20116	13.5663	0.018612	0.0268039	1336	2	10	6	6	0	0	0	0	0	0	0	0	0	0	0	0	0	0
MT2A:Upk3bl	Upk3bl								X	chr5	136061627	136076427	NA	NA	NA	MT2A	ERVL	LTR	+	terminator	-3.4499	-4.80453	-4.80453	-4.80453	-4.80453	5.96722	11.4704	0.0428106	0.054649	1337	2	10	0	0	1	0	0	0	0	0	0	0	0	0	0	0	0	1
MTD:Hspbap1	Hspbap1				X					chr16	35809192	35813917	MTD	ERVL-MaLR	LTR	NA	NA	NA	+	promoter_tss	0	3.8239	5.14413	5.7503	4.32661	6.82313	14.697	0.0117387	0.0180766	1338	0	0	0	0	0	1	1	1	5	0	2	0	14	1	4	0	2	1
Lx7:Mettl25	Mettl25									chr10	105797319	105799771	NA	NA	NA	Lx7	L1	LINE	-	promoter_tss	0	0	2.39781	5.74874	0	6.32846	15.269	0.00927257	0.0148028	1339	0	0	0	0	0	0	0	0	0	0	1	0	14	1	0	0	0	0
MTA_Mm:2610305D13Rik	2610305D13Rik									chr4	147618498	147630947	NA	NA	NA	MTA_Mm	ERVL-MaLR	LTR	-	internal	-0.49172	-4.80013	-1.38173	-0.894214	-4.80013	6.41317	11.7149	0.0389109	0.0504903	1340	4	8	2	1	9	0	0	0	1	1	0	1	1	2	0	0	0	0
B3:Klhl12	Klhl12									chr1	134461025	134463826	B3	B2	SINE	NA	NA	NA	+	internal	0	5.48514	6.89734	6.01407	3.00474	7.44172	30.1852	1.35608e-05	5.12601e-05	1341	0	0	0	0	0	2	1	8	2	3	23	4	8	6	0	0	2	0
MTA_Mm:Pla1a	Pla1a									chr16	38412187	38412641	NA	NA	NA	MTA_Mm	ERVL-MaLR	LTR	-	promoter_tss	-0.460328	-4.79846	-4.79846	-4.79846	-4.79846	6.198	17.2466	0.00405517	0.00724263	1342	5	7	5	2	5	0	0	0	0	0	0	0	0	0	0	0	0	0
MTA_Mm:Serpinc1	Serpinc1							X	X	chr1	160984850	160987440	MTA_Mm	ERVL-MaLR	LTR	NA	NA	NA	+	promoter_tss	-2.29413	-4.79662	-4.79662	-4.79662	-4.79662	6.00983	11.5979	0.040733	0.0523563	1343	6	6	0	2	1	0	0	0	0	0	0	0	0	0	0	0	0	2
MLT1E1A:Rps6ka6	Rps6ka6							X		chrX	111446290	111450291	NA	NA	NA	MLT1E1A	ERVL-MaLR	LTR	-	internal	-0.806285	-4.79662	-4.79662	-4.79662	-4.79662	6.1445	12.4048	0.0296432	0.0397882	1344	6	6	7	0	2	0	0	0	0	0	0	0	0	0	0	0	0	1
L2:Mapkap1	Mapkap1							X	X	chr2	34419265	34432002	L2	L2	LINE	NA	NA	NA	+	internal	-1.20025	0.161391	-4.7966	-4.7966	-2.68911	6.41543	15.2529	0.00933452	0.0148785	1345	6	6	2	1	4	2	2	3	0	0	0	0	0	0	0	0	1	2
MTC:Car10	Car10								X	chr11	93155791	93185081	MTC	ERVL-MaLR	LTR	NA	NA	NA	+	promoter_tss	-0.285631	-4.79285	-4.79285	-1.71224	-4.79285	6.30097	13.5645	0.0186259	0.026805	1346	8	4	1	3	10	0	0	0	0	0	0	1	1	0	0	0	0	1
MTA_Mm:Gtdc1	Gtdc1							X	X	chr2	44860326	44861485	NA	NA	NA	MTA_Mm	ERVL-MaLR	LTR	-	promoter_tss	-2.71743	-4.79089	-4.79089	-4.79089	-4.79089	5.98891	13.5481	0.0187494	0.0269448	1347	9	3	1	0	1	0	0	0	0	0	0	0	0	0	0	0	0	2
L2a:Ccp110	Ccp110							X	X	chr7	118712748	118714105	NA	NA	NA	L2a	L2	LINE	+	internal	-0.649989	-4.78864	0.695789	-4.78864	-4.78864	6.53885	12.5271	0.0282369	0.0382667	1348	10	2	8	1	1	0	0	0	0	9	0	0	0	0	0	0	0	2
MTD:Stxbp5l	Stxbp5l									chr16	37383705	37399058	NA	NA	NA	MTD	ERVL-MaLR	LTR	-	promoter_tss	-1.64005	-4.78892	-4.78892	-4.78892	-4.78892	6.05245	13.0347	0.0230554	0.0322114	1349	10	2	1	1	3	0	0	0	0	0	0	0	0	0	0	0	0	0
MTE2b:Timd4	Timd4								X	chr11	46838213	46839260	MTE2b	ERVL-MaLR	LTR	NA	NA	NA	+	promoter_tss	-4.78874	-4.78874	-4.78874	-1.69225	-4.78874	6.0321	12.8721	0.0246073	0.0339912	1350	10	2	0	0	0	0	0	0	0	0	0	1	1	0	0	0	0	1
Lx9:Mmaa	Mmaa									chr8	79281654	79284208	NA	NA	NA	Lx9	L1	LINE	-	internal/promoter_tss	0	0	0	6.06891	1.99603	6.43096	16.1756	0.00636008	0.0106792	1351	0	0	0	0	0	0	0	0	0	0	0	12	0	5	0	1	0	0
B3:Prickle2	Prickle2									chr6	92688441	92705345	B3	B2	SINE	NA	NA	NA	-	terminator	-1.63325	-1.46536	-0.87252	0.0836286	-2.68298	6.5701	6.15008	0.291888	0.305013	1352	11	1	1	3	1	1	1	0	1	1	1	2	3	3	0	0	1	0
MLT1A0:Baz2b	Baz2b								X	chr2	59983970	60001505	NA	NA	NA	MLT1A0	ERVL-MaLR	LTR	-	internal	-4.78422	-4.78422	-4.78422	-4.78422	-4.78422	5.94143	8.7487	0.119518	0.133559	1353	12	0	0	0	0	0	0	0	0	0	0	0	0	0	0	0	0	1
B3:Crtc1	Crtc1									chr8	70397449	70397745	B3	B2	SINE	NA	NA	NA	-	terminator	0	0	0	0	6.2936	6.53503	15.9713	0.00692648	0.0115066	1354	0	0	0	0	0	0	0	0	0	0	0	0	0	0	0	20	5	0
MTC:Rnf8	Rnf8									chr17	29616228	29621508	MTC	ERVL-MaLR	LTR	NA	NA	NA	+	promoter_tss	0.310076	-4.53483	-2.00583	-0.933014	-4.53483	6.40676	9.81079	0.0807774	0.0941789	1355	9	1	0	6	12	0	0	0	0	1	0	1	2	0	0	0	0	0
L1MB3:Mrvi1	Mrvi1									chr7	110920054	110921313	L1MB3	L1	LINE	NA	NA	NA	-	terminator	2.40317	-2.4415	-2.4415	-2.4415	-2.4415	6.11805	9.9973	0.0753119	0.0884115	1356	2	0	0	9	9	0	0	0	0	0	0	0	0	0	0	0	0	0
RMER19B:Fbxo36	Fbxo36									chr1	84875239	84881091	RMER19B	ERVK	LTR	NA	NA	NA	+	promoter_tss	1.9109	2.06915	1.33625	0.126373	0.38852	6.70075	4.29505	0.507764	0.515836	1357	2	1	0	14	4	3	2	2	1	1	2	1	1	0	0	3	0	0
B1_Mur1:LOC101055907	LOC101055907									chrX	169322842	169323004	B1_Mur1	Alu	SINE	NA	NA	NA	+	internal/promoter_tss	1.01931	1.19665	0.157898	0.935886	-3.84093	6.79102	7.00617	0.220182	0.234395	1358	5	1	1	17	0	2	4	1	2	1	0	1	1	6	0	0	0	0
ORR1A4:Fgfr1	Fgfr1			X						chr8	25512096	25514099	ORR1A4	ERVL-MaLR	LTR	MIRb	MIR	SINE	+	internal/promoter_tss	4.85762	3.22866	3.33866	4.46303	2.14611	6.48069	8.65049	0.123843	0.138092	1359	0	0	2	0	16	0	1	1	0	1	1	1	3	2	0	0	1	1
MLT2C1:Arhgap18	Arhgap18				X					chr10	26872764	26874097	NA	NA	NA	MLT2C1	ERVL	LTR	+	internal	-2.45744	-2.45744	3.87205	3.32588	0.840197	6.97967	20.6953	0.000924762	0.00208275	1360	0	2	0	0	0	0	0	0	0	13	4	9	2	3	2	1	0	1
B4A:Tdrd3	Tdrd3								X	chr14	87511770	87516220	NA	NA	NA	B4A	B4	SINE	+	terminator	3.17254	-1.68884	-1.68884	-1.68884	4.01751	6.58872	22.6985	0.00038543	0.000979136	1361	1	0	2	5	11	0	0	0	0	0	0	0	0	0	2	9	5	1
ORR1A1:Zmiz1	Zmiz1			X	X					chr14	25569230	25572019	ORR1A1	ERVL-MaLR	LTR	NA	NA	NA	+	promoter_tss	0	6.47382	6.36816	4.50803	4.80847	7.3711	16.9564	0.00458322	0.00808687	1362	0	0	0	0	0	3	5	14	5	8	4	0	0	7	0	0	7	2
B3:Emd	Emd									chrX	74256924	74259996	NA	NA	NA	B3	B2	SINE	+	terminator	0	5.15386	6.37745	2.14067	0	6.79538	38.6791	2.75557e-07	1.55779e-06	1363	0	0	0	0	0	2	3	3	7	6	4	0	0	1	0	0	0	0
MLT1E2:Mageb16	Mageb16									chrX	79627920	79641720	NA	NA	NA	MLT1E2	ERVL-MaLR	LTR	-	internal	0	0	0	4.37131	6.21379	6.64747	22.5992	0.000402615	0.00101697	1364	0	0	0	0	0	0	0	0	0	0	0	1	0	5	1	8	12	0
Lx7:Ddias	Ddias									chr7	92868198	92872761	Lx7	L1	LINE	NA	NA	NA	-	internal	0	5.08362	4.80971	5.88037	0	6.80269	26.5904	6.85336e-05	0.00021595	1365	0	0	0	0	0	2	1	5	0	3	3	9	4	2	0	0	0	0
ORR1A1:Eda	Eda									chrX	100387372	100389701	ORR1A1	ERVL-MaLR	LTR	NA	NA	NA	+	promoter_tss	0	3.3456	4.90423	4.6333	6.24125	6.94973	23.2364	0.000304182	0.000794448	1366	0	0	0	0	0	1	1	0	4	0	2	1	2	4	1	14	8	0
B1F1:Rgn	Rgn									chrX	20545233	20550362	B1F1	Alu	SINE	NA	NA	NA	+	promoter	0	5.2662	6.64493	6.18866	5.32724	7.50788	28.9687	2.35181e-05	8.34975e-05	1367	0	0	0	0	0	2	2	5	6	3	13	4	6	11	11	0	2	0
MTE2b:Tarm1	Tarm1									chr7	3489221	3495925	NA	NA	NA	MTE2b	ERVL-MaLR	LTR	-	internal	4.88636	0	0	0	0	6.08917	14.5085	0.0126823	0.0193258	1368	0	0	5	11	2	0	0	0	0	0	0	0	0	0	0	0	0	0
MTA_Mm:Nudcd3	Nudcd3		X							chr11	6125561	6125749	NA	NA	NA	MTA_Mm	ERVL-MaLR	LTR	-	promoter_tss	0.8368	-4.051	-4.051	-4.051	-4.051	6.21938	14.8159	0.0111788	0.0173978	1369	5	2	6	1	11	0	0	0	0	0	0	0	0	0	0	0	0	1
B1F2:Gata1	Gata1									chrX	7976030	7976479	NA	NA	NA	B1F2	Alu	SINE	-	promoter_tss	0	6.27055	4.24734	5.26605	6.16731	7.30879	16.6225	0.00527439	0.00910221	1370	0	0	0	0	0	2	2	16	0	2	2	2	3	6	0	0	18	0
MIRb:Itga3	Itga3			X	X					chr11	95055773	95055856	MIRb	MIR	SINE	NA	NA	NA	-	internal	0	0	0	5.66447	4.56118	6.48147	11.205	0.0474637	0.0598049	1371	0	0	0	0	0	0	0	0	0	0	0	0	14	0	7	1	0	2
MLT1A0:Baz2b	Baz2b								X	chr2	59978707	60001505	NA	NA	NA	MLT1A0	ERVL-MaLR	LTR	-	internal	3.21309	2.51958	1.71719	3.51799	0.4138	6.70221	10.2847	0.0675595	0.0800922	1372	0	1	9	3	6	1	2	1	1	1	0	1	1	9	0	0	1	1
B3:Atrx	Atrx									chrX	105910643	105911469	B3	B2	SINE	NA	NA	NA	-	internal	0.232379	0.0912317	-2.16094	-2.48853	-2.57951	6.61225	10.544	0.0612092	0.0735878	1373	6	5	9	3	6	2	2	2	0	1	0	0	1	0	0	0	1	0
ORR1A1:Zmiz1	Zmiz1			X	X					chr14	25569254	25572019	ORR1A1	ERVL-MaLR	LTR	NA	NA	NA	+	promoter_tss	0	4.56974	4.59381	3.09374	6.30388	6.92145	16.5196	0.00550699	0.00944477	1374	0	0	0	0	0	2	2	1	1	2	2	1	1	0	0	27	0	2
RMER15:Tet3	Tet3							X	X	chr6	83455480	83459006	NA	NA	NA	RMER15	ERVL	LTR	-	promoter_tss	3.22245	-1.69741	-1.69741	-1.69741	-1.69741	6.11714	16.485	0.00558757	0.00956199	1375	0	1	10	5	3	0	0	0	0	0	0	0	0	0	0	0	0	2
B1_Mur2:Ctc1	Ctc1									chr11	69033541	69033664	NA	NA	NA	B1_Mur2	Alu	SINE	+	internal	0	2.30742	6.44682	0	0	6.576	27.3991	4.76886e-05	0.000157549	1376	0	0	0	0	0	0	0	1	1	10	8	0	0	0	0	0	0	0
RSINE1:Ttc19	Ttc19									chr11	62306008	62309041	RSINE1	B4	SINE	NA	NA	NA	+	promoter	0	4.48846	4.9024	6.51032	2.9069	7.00866	29.3349	1.99309e-05	7.22673e-05	1377	0	0	0	0	0	1	2	2	2	3	1	2	4	22	0	1	1	0
L1M5:Mettl16	Mettl16									chr11	74792318	74795751	NA	NA	NA	L1M5	L1	LINE	+	internal	0	0	6.19449	0	2.78588	6.47653	15.2762	0.00924507	0.0147704	1378	0	0	0	0	0	0	0	0	0	14	1	0	0	0	0	2	0	0
L1Md_T:Zswim2	Zswim2						X			chr2	83930899	83938732	L1Md_T	L1	LINE	NA	NA	NA	-	terminator	0	6.30712	3.9175	6.42953	2.98872	7.21764	33.3148	3.25874e-06	1.43934e-05	1379	0	0	0	0	0	4	4	11	1	1	1	3	4	19	0	0	2	1
RSINE1:Gpatch2	Gpatch2									chr1	187229660	187230783	RSINE1	B4	SINE	NA	NA	NA	+	internal	0.414237	-1.40233	2.45413	-3.85857	1.93965	7.11122	8.74632	0.119621	0.133601	1380	0	6	9	2	0	0	1	0	14	0	1	0	0	0	0	8	8	0
B3A:Nme5	Nme5									chr18	34562803	34564213	NA	NA	NA	B3A	B2	SINE	-	internal	0	4.4861	6.31072	2.09894	5.88193	7.06312	16.9634	0.00456973	0.00807003	1382	0	0	0	0	0	1	2	2	14	0	1	0	0	1	0	1	14	0
RMER17A-int:Senp7	Senp7									chr16	56123970	56126140	NA	NA	NA	RMER17A-int	ERVK	LTR	+	terminator	0	0	3.4459	5.77114	6.10962	6.92282	20.6851	0.000928848	0.00208789	1383	0	0	0	0	0	0	0	0	1	1	0	1	1	15	6	0	13	0
ORR1D1:Fam192a	Fam192a									chr8	94589407	94591172	NA	NA	NA	ORR1D1	ERVL-MaLR	LTR	-	internal	0	4.36759	5.26498	3.09719	6.16384	6.92854	15.0074	0.0103308	0.0162012	1384	0	0	0	0	0	1	0	4	0	1	8	1	1	0	0	4	15	0
PB1D10:Mospd1	Mospd1							X		chrX	53357827	53360386	NA	NA	NA	PB1D10	Alu	SINE	-	internal	0	2.28513	6.25513	0	0	6.48323	20.4415	0.00103236	0.00228235	1385	0	0	0	0	0	0	0	1	0	13	3	0	0	0	0	0	0	1
MLT1J2:Rbpms2	Rbpms2								X	chr9	65630897	65650932	NA	NA	NA	MLT1J2	ERVL-MaLR	LTR	+	internal	0	2.43698	6.30691	2.13095	3.68639	6.63619	27.0569	5.56042e-05	0.000179638	1386	0	0	0	0	0	0	1	0	7	6	3	0	0	1	2	2	0	1
MT2B:Spag5	Spag5									chr11	78313939	78314342	MT2B	ERVL	LTR	NA	NA	NA	+	internal	0	0	6.36407	0	0	6.48729	17.9184	0.00305044	0.00577071	1387	0	0	0	0	0	0	0	0	13	0	3	0	0	0	0	0	0	0
L2a:Senp1	Senp1							X	X	chr15	98059954	98061949	NA	NA	NA	L2a	L2	LINE	-	internal	-0.170209	1.84373	0.965325	-4.66826	0.339198	7.34566	7.21284	0.205286	0.219566	1388	9	2	0	7	7	3	4	16	0	10	0	0	0	0	0	0	8	2
Lx2B2:Plcd4	Plcd4							X		chr1	74554293	74554489	Lx2B2	L1	LINE	NA	NA	NA	+	promoter	0	3.81699	3.85465	5.97734	2.90501	6.6505	24.8449	0.000149277	0.000428753	1389	0	0	0	0	0	1	1	1	0	1	2	2	9	7	0	1	1	1
MTD:Ccnyl1	Ccnyl1							X		chr1	64702380	64706269	NA	NA	NA	MTD	ERVL-MaLR	LTR	+	terminator	-1.68794	4.6425	-1.68794	-1.68794	-1.68794	6.51778	29.5021	1.84786e-05	6.78433e-05	1390	1	0	0	0	0	5	4	10	0	0	0	0	0	0	0	0	0	1
ID_B1:Mtg2	Mtg2									chr2	180071886	180073139	ID_B1	B4	SINE	NA	NA	NA	+	internal/promoter_tss	0	0	3.20436	5.81646	0	6.36685	10.3803	0.0651494	0.0775498	1391	0	0	0	0	0	0	0	0	0	0	2	13	0	0	0	0	0	0
MT2C_Mm:Gm12789	Gm12789						X	X	X	chr4	101986947	101988088	MT2C_Mm	ERVL	LTR	NA	NA	NA	+	promoter_tss	0	6.20602	4.93042	4.30003	0	6.81509	19.2647	0.00171569	0.00354045	1393	0	0	0	0	0	4	6	7	1	5	0	0	0	6	0	0	0	3
MT2B2:Glis3	Glis3							X	X	chr19	28666236	28693884	NA	NA	NA	MT2B2	ERVL	LTR	-	promoter_tss	0	0	6.1136	3.73579	1.98791	6.52614	10.8538	0.0543578	0.0670861	1394	0	0	0	0	0	0	0	0	0	14	0	0	0	4	0	1	0	2
ORR1B2:Kat6b	Kat6b									chr14	21481553	21516625	ORR1B2	ERVL-MaLR	LTR	NA	NA	NA	+	promoter_tss	0	5.76782	6.11123	5.40895	2.00912	7.09914	17.8105	0.00319355	0.00599706	1395	0	0	0	0	0	2	4	7	0	14	0	1	1	11	0	1	0	0
PB1D9:Naa50	Naa50							X		chr16	44140111	44144780	NA	NA	NA	PB1D9	Alu	SINE	+	internal	0	4.77463	5.72527	5.80696	2.80654	6.94381	21.0652	0.000787408	0.00181744	1396	0	0	0	0	0	2	2	2	6	0	5	0	12	4	1	1	0	1
B4A:Tyw1	Tyw1									chr5	130257193	130258932	NA	NA	NA	B4A	B4	SINE	+	internal	-1.5535	0.869277	2.00557	1.60975	3.13928	6.96351	9.73759	0.0830214	0.0964652	1397	0	3	1	0	0	1	1	1	5	0	1	4	0	2	2	1	15	0
MTC:Rrh	Rrh									chr3	129815750	129816254	NA	NA	NA	MTC	ERVL-MaLR	LTR	-	promoter_tss	1.82846	-2.94149	-2.94149	-2.94149	-2.94149	6.11835	12.6673	0.0267044	0.0365043	1398	2	1	1	1	15	0	0	0	0	0	0	0	0	0	0	0	0	0
B1_Mus2:Pole	Pole			X	X					chr5	110313028	110313436	NA	NA	NA	B1_Mus2	Alu	SINE	+	internal	0	4.99807	4.69084	5.65269	2.80312	6.75892	17.4829	0.0036694	0.00665831	1399	0	0	0	0	0	2	3	2	4	0	1	0	13	1	1	1	0	2
MTA_Mm:Foxj3	Foxj3							X	X	chr4	119543389	119560602	MTA_Mm	ERVL-MaLR	LTR	NA	NA	NA	+	promoter_tss	3.0877	-1.69843	-1.69843	-1.69843	-1.69843	6.0835	12.6242	0.0271665	0.0370003	1400	0	1	2	13	2	0	0	0	0	0	0	0	0	0	0	0	0	2
MIRb:Dedd2	Dedd2									chr7	25205889	25211148	MIRb	MIR	SINE	NA	NA	NA	-	internal	0	0	6.17709	0	3.65642	6.52302	18.7569	0.0021331	0.00426412	1401	0	0	0	0	0	0	0	0	0	13	2	0	0	0	2	2	0	0
Lx3_Mus:Uprt	Uprt							X	X	chrX	104493915	104495735	Lx3_Mus	L1	LINE	NA	NA	NA	+	promoter_tss	3.10758	2.48137	1.66134	3.19869	0.409553	6.6142	9.73834	0.082998	0.0964652	1402	1	0	4	2	11	1	1	2	0	1	1	2	4	2	0	0	1	2
B1_Mur4:Fam63a	Fam63a									chr3	95291544	95291906	NA	NA	NA	B1_Mur4	Alu	SINE	+	internal	2.07687	4.22562	6.28324	0	0	6.63043	22.3181	0.000455476	0.0011263	1403	0	0	1	1	0	1	2	1	13	0	2	0	0	0	0	0	0	0
Lx6:Zfp932	Zfp932									chr5	109996633	110003352	NA	NA	NA	Lx6	L1	LINE	+	internal/terminator	2.11485	3.37938	6.28765	0	5.44915	6.89963	14.6261	0.0120856	0.0185409	1404	0	0	2	0	0	1	1	0	13	0	2	0	0	0	10	5	0	0
MTD:Zfp957	Zfp957							X	X	chr14	79180211	79247216	NA	NA	NA	MTD	ERVL-MaLR	LTR	-	promoter_tss	4.81027	0	2.53179	3.09657	0	6.19807	11.1889	0.0477601	0.0600303	1405	0	0	6	0	11	0	0	0	0	1	0	1	1	0	0	0	0	2
MTC:Nfil3	Nfil3								X	chr13	52969021	52972877	NA	NA	NA	MTC	ERVL-MaLR	LTR	-	promoter_tss	4.82112	0	0	0	0	6.0716	14.5184	0.0126313	0.0192769	1406	0	0	7	4	6	0	0	0	0	0	0	0	0	0	0	0	0	1
RMER15:Epha6	Epha6							X	X	chr16	60402437	60424720	RMER15	ERVL	LTR	NA	NA	NA	-	terminator	2.38158	-2.44264	-2.44264	-2.44264	-2.44264	6.11127	13.302	0.020707	0.0294068	1407	2	0	7	9	1	0	0	0	0	0	0	0	0	0	0	0	0	2
B3:Ube2w	Ube2w									chr1	16544032	16581926	B3	B2	SINE	NA	NA	NA	-	internal	-2.60769	-4.6877	-4.6877	-4.6877	-4.6877	5.97046	9.43358	0.0929704	0.106632	1408	0	11	1	1	0	0	0	0	0	0	0	0	0	0	0	0	0	0
MTB:Snx7	Snx7									chr3	117846696	117848158	NA	NA	NA	MTB	ERVL-MaLR	LTR	-	promoter_tss	-2.56628	-4.68559	-4.68559	-4.68559	-4.68559	5.972	9.05007	0.107084	0.12072	1409	1	10	2	0	0	0	0	0	0	0	0	0	0	0	0	0	0	0
MTB:Slc25a26	Slc25a26									chr6	94553113	94598379	MTB	ERVL-MaLR	LTR	NA	NA	NA	+	promoter_tss	-4.68475	-4.68475	-1.34467	-0.474418	-2.54421	6.25242	12.6128	0.02729	0.0371064	1410	1	10	0	0	0	0	0	0	0	1	1	1	2	2	0	0	1	0
MTA_Mm:Lonrf3	Lonrf3							X		chrX	36345733	36353841	MTA_Mm	ERVL-MaLR	LTR	NA	NA	NA	+	promoter_tss	-4.68415	-0.868042	-0.767403	-0.0242374	-2.56876	6.47661	12.8382	0.0249427	0.034395	1411	1	10	0	0	0	1	1	1	1	1	1	1	3	3	0	0	1	1
RLTR20C2_MM:Antxr1	Antxr1						X	X	X	chr6	87162034	87180109	NA	NA	NA	RLTR20C2_MM	ERVK	LTR	-	internal	0.834843	4.56862	-1.69709	-1.69709	-1.69709	6.53506	25.5765	0.000107793	0.000320403	1412	0	1	1	2	0	5	4	9	0	0	0	0	0	0	0	0	0	3
L2:Top2b	Top2b								X	chr14	16417035	16418336	L2	L2	LINE	NA	NA	NA	+	internal	-0.767586	-4.67884	-4.67884	-4.67884	0.068986	6.37894	13.1757	0.0217871	0.0306427	1413	4	7	1	2	6	0	0	0	0	0	0	0	0	0	8	1	0	1
MER68:Abhd10	Abhd10									chr16	45729993	45731706	MER68	ERVL	LTR	NA	NA	NA	-	terminator	-0.586817	-4.4067	-0.983905	-0.501834	1.69556	6.85703	12.3924	0.0297886	0.039946	1414	1	8	6	0	2	0	0	0	1	1	0	1	1	2	2	8	10	0
PB1D7:Pigl	Pigl									chr11	62511809	62512137	PB1D7	Alu	SINE	NA	NA	NA	+	promoter_tss	0	3.23267	5.72396	4.80458	6.04732	7.03588	24.2653	0.000193051	0.00053567	1415	0	0	0	0	0	0	1	1	0	9	2	1	2	5	11	5	5	0
ID_B1:Mospd1	Mospd1							X		chrX	53347865	53349235	NA	NA	NA	ID_B1	B4	SINE	-	internal	0.794097	-4.04835	-4.04835	-4.04835	-2.02841	6.23837	14.2497	0.0140988	0.0211223	1416	6	1	10	3	4	0	0	0	0	0	0	0	0	0	0	1	0	1
ORR1D1-int:Cldn34b2	Cldn34b2								X	chrX	155125855	155127079	NA	NA	NA	ORR1D1-int	ERVL-MaLR	LTR	-	promoter_tss	-4.67479	-0.113753	-2.11533	-4.67479	-4.67479	6.21419	16.8051	0.00488456	0.00855949	1417	6	5	0	0	0	2	2	1	1	0	0	0	0	0	0	0	0	1
ORR1A2:Galnt9	Galnt9									chr5	110591431	110596065	ORR1A2	ERVL-MaLR	LTR	NA	NA	NA	+	promoter_tss	0	0	2.42574	5.74109	2.17308	6.36269	18.9174	0.00199145	0.0040442	1418	0	0	0	0	0	0	0	0	0	0	1	1	11	3	0	0	1	0
L1_Mus2:Mettl6	Mettl6									chr14	31464884	31465336	L1_Mus2	L1	LINE	NA	NA	NA	-	terminator	4.84649	3.81422	3.91569	4.87186	2.10513	6.61772	12.8193	0.0251324	0.0345867	1419	0	0	11	5	1	1	1	1	1	1	1	2	3	3	0	0	1	0
ORR1E:1700019D03Rik	1700019D03Rik								X	chr1	52925734	52991268	NA	NA	NA	ORR1E	ERVL-MaLR	LTR	-	promoter_tss	-2.62661	-4.66819	-4.66819	-4.66819	-4.66819	5.96558	9.44279	0.0926536	0.106388	1420	9	2	0	2	0	0	0	0	0	0	0	0	0	0	0	0	0	1
MTD:Me1	Me1							X		chr9	86679952	86687188	NA	NA	NA	MTD	ERVL-MaLR	LTR	-	promoter_tss	-1.23605	-1.30543	-4.66853	-4.66853	-4.66853	6.15523	10.528	0.0615838	0.0738768	1421	9	2	4	0	2	1	1	0	0	0	0	0	0	0	0	0	0	1
MTA_Mm:Efhb	Efhb									chr17	53452623	53464699	NA	NA	NA	MTA_Mm	ERVL-MaLR	LTR	-	promoter_tss	-1.81871	-4.66607	-4.66607	-4.66607	-4.66607	6.00888	9.91091	0.0777992	0.0911744	1422	10	1	0	2	2	0	0	0	0	0	0	0	0	0	0	0	0	0
ID_B1:Dcun1d3	Dcun1d3									chr7	119859915	119900251	NA	NA	NA	ID_B1	B4	SINE	-	internal	0	6.14505	2.56062	0	2.01995	6.48599	27.6705	4.2214e-05	0.000141521	1423	0	0	0	0	0	5	5	6	1	0	0	0	0	0	0	1	0	0
ID_B1:Asap1	Asap1							X	X	chr15	64295822	64296556	ID_B1	B4	SINE	NA	NA	NA	-	internal	-0.615716	-4.66398	-4.66398	-4.66398	-4.66398	6.1326	11.6947	0.0392189	0.0507838	1424	11	0	1	1	8	0	0	0	0	0	0	0	0	0	0	0	0	2
PB1D10:Sspn	Sspn							X	X	chr6	145960110	145961129	PB1D10	Alu	SINE	NA	NA	NA	+	internal	-4.66495	-1.43249	-0.746521	0.206399	-2.53119	6.46888	11.7938	0.0377253	0.0490765	1425	11	0	0	0	0	0	1	1	1	1	1	2	3	3	0	0	1	2
B1_Mur1:Nrg4	Nrg4							X	X	chr9	55221408	55225402	B1_Mur1	Alu	SINE	NA	NA	NA	-	terminator	0.672778	-2.45031	-2.45031	3.11002	-2.45031	6.34673	10.7783	0.0559583	0.068895	1426	1	1	0	1	4	0	0	0	0	0	0	0	13	0	0	0	0	2
ID2:Themis2	Themis2									chr4	132783005	132783347	ID2	ID	SINE	NA	NA	NA	-	terminator	0	4.16063	6.43156	0	0	6.66492	25.4137	0.000115906	0.000341539	1427	0	0	0	0	0	1	1	2	10	0	8	0	0	0	0	0	0	0
MTEa:Fbxo16	Fbxo16									chr14	65297149	65299185	MTEa	ERVL-MaLR	LTR	NA	NA	NA	+	internal	0	6.31141	5.70495	3.60262	4.77017	7.11048	17.4677	0.00369308	0.00668349	1428	0	0	0	0	0	5	3	11	0	3	9	1	2	0	0	9	0	0
MT2B:Gpcpd1	Gpcpd1				X					chr2	132572254	132587620	NA	NA	NA	MT2B	ERVL	LTR	-	promoter_tss	0	4.82107	6.19533	4.88088	5.73616	7.18498	18.5317	0.00234877	0.00460521	1429	0	0	0	0	0	2	3	1	12	1	1	0	1	8	13	4	1	1
L1MC4:Fam135a	Fam135a							X	X	chr1	24032736	24042948	NA	NA	NA	L1MC4	L1	LINE	-	internal/promoter_tss	0	2.45931	6.2137	2.08361	0	6.48441	16.0948	0.00657844	0.0109909	1430	0	0	0	0	0	0	1	0	13	0	1	0	0	1	0	0	0	2
ORR1A2:43892	43892									chr17	33688242	33696036	ORR1A2	ERVL-MaLR	LTR	NA	NA	NA	-	internal/terminator	0	2.46019	6.21413	2.08147	0	6.48441	15.579	0.00815482	0.0133384	1431	0	0	0	0	0	0	1	0	13	0	1	0	0	1	0	0	0	0
B3:1700001O22Rik	1700001O22Rik									chr2	30801001	30802010	NA	NA	NA	B3	B2	SINE	-	promoter_tss	0	2.45979	6.21394	2.08245	0	6.48441	15.8129	0.00739904	0.0122123	1432	0	0	0	0	0	0	1	0	13	0	1	0	0	1	0	0	0	0
B1_Mur2:Ubap2l	Ubap2l			X		X				chr3	90007526	90008255	B1_Mur2	Alu	SINE	NA	NA	NA	-	terminator	1.36464	4.81312	3.42323	3.55221	6.06936	6.81457	19.9105	0.00129898	0.00276712	1433	0	0	0	1	0	2	3	1	1	1	0	1	1	1	11	12	0	2
B1_Mus1:Pld4	Pld4								X	chr12	112766494	112766702	B1_Mus1	Alu	SINE	NA	NA	NA	+	promoter	0	3.26634	6.64337	5.69467	4.82387	7.21445	27.1353	5.36833e-05	0.000174258	1434	0	0	0	0	0	1	0	1	2	4	17	4	7	3	0	8	1	1
PB1D9:Gtf2h1	Gtf2h1				X					chr7	46797465	46801671	PB1D9	Alu	SINE	NA	NA	NA	+	internal	0.35142	4.27866	4.96629	1.3738	3.4867	7.33464	20.589	0.000968399	0.00215962	1435	0	1	0	1	1	4	2	9	5	1	17	1	1	0	0	3	7	1
ID_B1:Mtg2	Mtg2									chr2	180071886	180078003	ID_B1	B4	SINE	MER21C	ERVL	LTR	+	internal/promoter_tss	0	0	6.16006	4.64395	0	6.61677	17.7332	0.00330006	0.0061575	1436	0	0	0	0	0	0	0	0	0	12	3	5	0	1	0	0	0	0
L2a:Aqp9	Aqp9									chr9	71164653	71164963	NA	NA	NA	L2a	L2	LINE	-	internal/promoter_tss	0	3.82422	4.22262	5.6377	0	6.52048	17.7034	0.0033421	0.0062292	1437	0	0	0	0	0	1	1	1	1	0	3	0	12	2	0	0	0	0
LTR104_Mam:Atp1b2	Atp1b2									chr11	69603111	69603424	NA	NA	NA	LTR104_Mam	Gypsy	LTR	-	internal/promoter_tss	0	5.89705	5.19065	0	6.07384	7.07702	22.1251	0.000495685	0.0012169	1438	0	0	0	0	0	3	4	7	6	0	1	0	0	0	0	8	11	0
MIRc:Mecr	Mecr									chr4	131860863	131861176	NA	NA	NA	MIRc	MIR	SINE	+	internal	0	2.46113	5.8629	0	5.90661	6.83144	14.7259	0.0116	0.0178838	1439	0	0	0	0	0	0	1	0	10	0	1	0	0	0	20	1	0	0
MT2B2:Stk11	Stk11									chr10	80113591	80124801	MT2B2	ERVL	LTR	NA	NA	NA	+	promoter_tss	0	3.38148	5.64897	5.02292	5.90963	7.02294	12.9566	0.0237886	0.0330712	1440	0	0	0	0	0	1	1	0	7	0	3	0	8	1	20	1	0	0
MT2B2:Il1r1	Il1r1							X		chr1	40277331	40282232	MT2B2	ERVL	LTR	NA	NA	NA	+	internal/promoter_tss	1.73973	-2.94146	-2.94146	-2.94146	-2.94146	6.09747	12.0011	0.0347732	0.0457013	1441	2	1	0	6	10	0	0	0	0	0	0	0	0	0	0	0	0	1
ORR1A0:4833420G17Rik	4833420G17Rik									chr13	119464690	119466010	ORR1A0	ERVL-MaLR	LTR	NA	NA	NA	+	internal	0	0	2.43213	5.64087	0	6.28383	22.3501	0.000449144	0.00111199	1442	0	0	0	0	0	0	0	0	0	0	1	5	7	1	0	0	0	0
L2a:Meikin	Meikin									chr11	54395824	54398455	L2a	L2	LINE	NA	NA	NA	+	internal	0	4.85943	6.72672	5.5919	3.00852	7.22056	27.3077	4.96862e-05	0.000162834	1443	0	0	0	0	0	1	1	5	1	3	21	4	6	3	0	0	2	0
RLTR23:Ttc9b	Ttc9b									chr7	27647652	27654911	RLTR23	ERV1	LTR	NA	NA	NA	+	promoter_tss	0	3.11169	6.72496	5.22794	5.16943	7.20597	17.7671	0.00325291	0.00608475	1444	0	0	0	0	0	0	0	2	2	2	21	3	5	2	0	0	9	0
B1_Mur4:Eif4e1b	Eif4e1b							X	X	chr13	54784301	54784808	B1_Mur4	Alu	SINE	NA	NA	NA	+	internal/promoter	3.00206	-1.6975	-1.6975	-1.6975	-1.6975	6.06203	14.7332	0.0115652	0.0178631	1445	0	1	2	6	8	0	0	0	0	0	0	0	0	0	0	0	0	2
ORR1A2:Axdnd1	Axdnd1									chr1	156341894	156345420	NA	NA	NA	ORR1A2	ERVL-MaLR	LTR	-	promoter_tss	0	4.16847	3.36803	2.23697	5.95869	6.63305	27.3191	4.9434e-05	0.000162267	1446	0	0	0	0	0	1	1	2	1	0	1	1	0	0	13	3	4	0
MTE2b:Gmpr	Gmpr									chr13	45517082	45520031	NA	NA	NA	MTE2b	ERVL-MaLR	LTR	+	internal	3.01532	0.607088	-1.69803	0.491647	3.3008	6.44299	8.33919	0.138507	0.152038	1447	0	1	4	2	10	0	0	1	0	0	0	0	1	0	0	0	8	0
L2:Lin28b	Lin28b								X	chr10	45419208	45420523	L2	L2	LINE	NA	NA	NA	-	internal	0	4.48562	6.00684	5.75295	0	6.93406	16.0889	0.00659484	0.0110004	1448	0	0	0	0	0	1	2	2	0	13	0	1	0	16	0	0	0	1
MT2C_Mm:Rbsn	Rbsn									chr6	92211901	92215750	NA	NA	NA	MT2C_Mm	ERVL	LTR	-	promoter_tss	0	2.26155	4.73036	0	6.01036	6.6217	12.3179	0.0306821	0.0409562	1449	0	0	0	0	0	0	0	1	1	0	5	0	0	0	0	0	16	0
ORR1B1:Tstd3	Tstd3									chr4	21759793	21772297	NA	NA	NA	ORR1B1	ERVL-MaLR	LTR	-	promoter_tss	0	4.22796	6.12743	5.58615	5.9306	7.25828	15.1735	0.00964597	0.0152915	1450	0	0	0	0	0	1	2	1	13	0	0	1	0	14	5	5	8	0
L1M2:Aebp2	Aebp2			X	X					chr6	140640639	140642171	L1M2	L1	LINE	NA	NA	NA	+	internal	0	4.16836	4.31569	6.30622	2.90303	6.83775	29.4585	1.8847e-05	6.90712e-05	1451	0	0	0	0	0	1	1	2	1	2	1	2	4	18	0	1	1	2
Lx5b:Gm3259	Gm3259									chr5	95309323	95340183	Lx5b	L1	LINE	NA	NA	NA	+	internal	0.195113	-4.54607	-4.54607	-4.54607	-4.54607	6.23927	18.1804	0.00272865	0.00525565	1452	4	6	7	7	2	0	0	0	0	0	0	0	0	0	0	0	0	0
PB1D9:Tmed5	Tmed5									chr5	108129552	108130017	PB1D9	Alu	SINE	NA	NA	NA	-	terminator	0	5.6924	6.02613	3.08477	5.95421	7.20514	20.9949	0.000811875	0.00186969	1453	0	0	0	0	0	2	1	10	2	1	12	1	1	0	5	0	12	0
MTC:Tiam1	Tiam1							X	X	chr16	90064836	90066520	MTC	ERVL-MaLR	LTR	NA	NA	NA	-	terminator	2.08958	6.11592	4.64031	5.9424	2.03146	7.06902	29.5449	1.81239e-05	6.67809e-05	1454	0	0	2	0	0	4	5	7	2	2	1	3	3	12	0	1	0	2
RSINE1:Ctc1	Ctc1									chr11	69029111	69029685	RSINE1	B4	SINE	NA	NA	NA	+	internal/promoter	0	0	2.39287	5.54436	0	6.25779	13.4117	0.0198117	0.0283321	1455	0	0	0	0	0	0	0	0	0	0	1	0	12	1	0	0	0	0
RMER17C:Iqcg	Iqcg				X					chr16	33040892	33041298	NA	NA	NA	RMER17C	ERVK	LTR	-	promoter_tss	0	2.44342	6.12791	2.11838	2.81253	6.51343	21.5353	0.000641535	0.00152729	1456	0	0	0	0	0	0	1	0	6	6	2	0	0	1	0	2	0	1
PB1:Spryd7	Spryd7									chr14	61549860	61554770	NA	NA	NA	PB1	Alu	SINE	-	internal	0	5.51089	5.20881	3.07195	6.00561	7.03047	24.7809	0.000153582	0.000439267	1457	0	0	0	0	0	4	3	3	2	1	5	1	1	0	11	11	0	0
L1MC3:Fnip2	Fnip2						X	X		chr3	79504513	79506206	L1MC3	L1	LINE	NA	NA	NA	-	terminator	0	2.33827	6.63184	5.5778	2.13475	7.02334	32.3529	5.05782e-06	2.15036e-05	1459	0	0	0	0	0	0	0	1	2	3	18	4	5	4	0	0	1	2
ID_B1:D11Wsu47e	D11Wsu47e									chr11	113699118	113699205	NA	NA	NA	ID_B1	B4	SINE	+	internal	0	2.34491	6.63412	5.68121	2.12616	7.04501	35.5576	1.16434e-06	5.65574e-06	1460	0	0	0	0	0	0	0	1	2	3	18	4	6	4	0	0	1	0
B3:Unk	Unk									chr11	116034844	116038539	B3	B2	SINE	NA	NA	NA	+	promoter	0	3.26614	6.63329	5.68139	4.03173	7.14103	29.4016	1.93382e-05	7.03676e-05	1461	0	0	0	0	0	1	0	1	2	3	18	4	6	4	4	0	1	0
ORR1A0:Ddr2	Ddr2									chr1	170088944	170097233	NA	NA	NA	ORR1A0	ERVL-MaLR	LTR	-	promoter_tss	3.3818	3.10048	5.98742	0	5.97784	6.96146	13.3128	0.0206176	0.0293002	1462	0	0	1	3	2	0	0	2	0	12	1	0	0	0	0	1	15	0
ID4:Adk	Adk									chr14	21318183	21326591	NA	NA	NA	ID4	ID	SINE	+	terminator	-2.18734	0.757024	-0.253376	1.50754	1.76038	7.19157	10.205	0.0696295	0.0823077	1463	4	4	0	2	0	2	3	2	2	1	0	2	2	12	0	7	11	0
ORR1A2:Gapt	Gapt						X	X		chr13	110357267	110373853	NA	NA	NA	ORR1A2	ERVL-MaLR	LTR	-	promoter_tss	0	6.16635	2.52773	0	3.31452	6.54865	23.2988	0.000295936	0.000777877	1465	0	0	0	0	0	4	4	9	0	1	0	0	0	0	0	3	0	2
ORR1B1:Vmn2r94	Vmn2r94						X	X		chr17	18258385	18260018	NA	NA	NA	ORR1B1	ERVL-MaLR	LTR	-	internal	0	0	6.29246	0	0	6.46221	16.7471	0.0050053	0.00871135	1466	0	0	0	0	0	0	0	0	10	0	6	0	0	0	0	0	0	2
L1_Mur2:Mcf2	Mcf2									chrX	60077402	60081159	NA	NA	NA	L1_Mur2	L1	LINE	-	internal	0	0	6.29191	0	0	6.46221	19.3537	0.00165124	0.00342692	1467	0	0	0	0	0	0	0	0	10	0	6	0	0	0	0	0	0	0
Lx3_Mus:Klhl1	Klhl1								X	chr14	96240394	96248710	NA	NA	NA	Lx3_Mus	L1	LINE	-	promoter_tss	-2.43167	-4.55599	-4.55599	-4.55599	-4.55599	5.95039	7.12914	0.211212	0.22508	1468	0	10	2	0	0	0	0	0	0	0	0	0	0	0	0	0	0	1
MTA_Mm:Msh4	Msh4									chr3	153879433	153879929	NA	NA	NA	MTA_Mm	ERVL-MaLR	LTR	-	promoter_tss	-0.510454	-4.55595	-4.55595	-4.55595	-4.55595	6.11653	8.52775	0.129449	0.143326	1469	0	10	1	0	9	0	0	0	0	0	0	0	0	0	0	0	0	0
MTD:Ldlrad4	Ldlrad4									chr18	67971153	68005684	MTD	ERVL-MaLR	LTR	NA	NA	NA	+	promoter_tss	-2.05675	-4.55554	-2.02236	-2.36568	-4.55554	6.06127	6.45332	0.264572	0.277747	1470	0	10	0	1	2	0	0	0	0	1	0	0	1	0	0	0	0	0
MTA_Mm-int:2610305D13Rik	2610305D13Rik									chr4	147618498	147631560	NA	NA	NA	MTA_Mm-int	ERVL-MaLR	LTR	-	internal	-3.18639	0.874844	-2.0331	0.238372	-2.43398	6.6496	13.3975	0.0199254	0.0284748	1471	1	9	0	1	0	2	3	5	0	1	0	1	1	6	0	0	1	0
MLTR31A_MM:Adarb2	Adarb2									chr13	8727233	8731789	MLTR31A_MM	ERVK	LTR	NA	NA	NA	+	promoter_tss	-0.96567	-0.0412527	-2.02907	-1.47563	-4.55253	6.38783	6.94777	0.224554	0.238428	1472	1	9	1	6	0	2	1	2	0	1	0	1	1	0	0	0	0	0
B2_Mm1a:Dhtkd1	Dhtkd1								X	chr2	5923673	5923868	B2_Mm1a	B2	SINE	NA	NA	NA	-	terminator	0	6.03756	4.67732	5.33644	3.39512	6.9393	25.1478	0.000130468	0.000379526	1473	0	0	0	0	0	4	5	6	4	0	1	1	2	9	1	1	1	1
MT2C_Mm:Pkig	Pkig			X						chr2	163663964	163703485	MT2C_Mm	ERVL	LTR	NA	NA	NA	+	promoter_tss	0	5.31182	6.54125	3.59175	3.98465	7.04199	25.5011	0.000111477	0.000330391	1474	0	0	0	0	0	3	2	4	5	1	15	1	2	0	1	4	0	1
MLT2B1:1810062G17Rik	1810062G17Rik									chr3	36476239	36479483	NA	NA	NA	MLT2B1	ERVL	LTR	+	internal	-2.05013	-4.55077	-4.55077	-4.55077	-4.55077	5.96811	10.8102	0.0552761	0.0681372	1475	2	8	0	1	2	0	0	0	0	0	0	0	0	0	0	0	0	0
ORR1C1:Gm21154	Gm21154									chr14	43651003	43670176	NA	NA	NA	ORR1C1	ERVL-MaLR	LTR	+	terminator	-3.19489	-4.55083	-4.55083	-4.55083	-4.55083	5.92277	11.0415	0.0505632	0.0630114	1476	2	8	0	0	1	0	0	0	0	0	0	0	0	0	0	0	0	0
MTC:Prkg1	Prkg1									chr19	30894695	30896506	NA	NA	NA	MTC	ERVL-MaLR	LTR	-	promoter_tss	-0.0377672	-4.55073	-4.55073	-4.55073	-4.55073	6.19392	14.309	0.0137612	0.0207377	1477	2	8	1	12	1	0	0	0	0	0	0	0	0	0	0	0	0	0
ID_B1:Rabif	Rabif									chr1	134494809	134501166	NA	NA	NA	ID_B1	B4	SINE	+	internal	1.36309	0	6.30926	4.61648	2.00823	6.71264	24.3602	0.000185098	0.000515701	1478	0	0	0	1	0	0	0	0	5	4	8	5	0	1	1	0	0	0
MTD:Fhod3	Fhod3							X	X	chr18	24758202	24770482	MTD	ERVL-MaLR	LTR	NA	NA	NA	+	promoter_tss	-0.0268075	-0.310212	-2.02872	-0.964985	-4.54587	6.49829	8.86809	0.114443	0.128309	1479	4	6	2	3	9	2	1	1	0	1	0	1	2	0	0	0	0	2
B3A:Gtf2a2	Gtf2a2								X	chr9	70018818	70019388	B3A	B2	SINE	NA	NA	NA	+	internal	0	0	4.73418	0	5.95768	6.57835	16.4697	0.00562357	0.0095995	1480	0	0	0	0	0	0	0	0	1	0	5	0	0	0	0	2	14	1
B1_Mur4:Ipcef1	Ipcef1							X	X	chr10	6911958	6919713	B1_Mur4	Alu	SINE	NA	NA	NA	-	terminator	0.0187437	-4.54392	-4.54392	-4.54392	-4.54392	6.20252	17.5198	0.00361259	0.006573	1481	5	5	7	5	2	0	0	0	0	0	0	0	0	0	0	0	0	2
HERVL40-int:Zfp131	Zfp131									chr13	119776449	119778432	NA	NA	NA	HERVL40-int	ERVL	LTR	-	internal	1.35404	0	5.98754	0	1.98692	6.3812	16.7558	0.00498705	0.00870181	1482	0	0	0	0	1	0	0	0	0	12	1	0	0	0	1	0	0	0
Lx6:Cenpp	Cenpp									chr13	49560314	49627254	Lx6	L1	LINE	NA	NA	NA	-	internal/terminator	0	0	5.98844	0	0	6.33507	15.4468	0.00861433	0.0139149	1483	0	0	0	0	0	0	0	0	0	12	1	0	0	0	0	0	0	0
B4A:Esf1	Esf1						X	X		chr2	140168455	140169063	NA	NA	NA	B4A	B4	SINE	-	internal	0	3.82479	5.98693	5.18607	2.00971	6.76563	16.5271	0.00548981	0.00943417	1484	0	0	0	0	0	1	1	1	0	12	1	7	0	2	0	1	0	2
B2_Mm2:Katna1	Katna1							X		chr10	7743736	7744026	NA	NA	NA	B2_Mm2	B2	SINE	+	internal	0	3.38013	6.10279	2.09529	0	6.48348	17.8946	0.00308141	0.00581319	1485	0	0	0	0	0	1	1	0	12	0	1	0	0	1	0	0	0	1
MIRc:Dmwd	Dmwd							X	X	chr7	19076701	19081918	NA	NA	NA	MIRc	MIR	SINE	+	internal	0	2.32975	4.97463	5.62449	3.90832	6.65831	18.9027	0.002004	0.00406566	1486	0	0	0	0	0	0	0	1	0	2	5	5	6	2	0	1	3	2
PB1:Tubd1	Tubd1									chr11	86555304	86556694	NA	NA	NA	PB1	Alu	SINE	+	internal	0	4.77646	2.57271	0	6.02382	6.66276	22.1307	0.000494472	0.00121538	1487	0	0	0	0	0	2	2	2	1	0	0	0	0	0	0	14	6	0
MT2B2:Gm6902	Gm6902						X			chr7	23274130	23278740	NA	NA	NA	MT2B2	ERVL	LTR	-	internal/promoter_tss	0	5.53706	5.87103	4.77336	6.02379	7.25816	17.3049	0.00395641	0.00709102	1488	0	0	0	0	0	2	3	6	0	11	1	1	1	6	0	14	6	1
ORR1A2:R3hdm2	R3hdm2								X	chr10	127399860	127400125	ORR1A2	ERVL-MaLR	LTR	NA	NA	NA	+	promoter_tss	-2.00746	-4.53727	-4.53727	-2.34819	-4.53727	6.01011	10.0304	0.0743783	0.0875165	1489	8	2	1	1	1	0	0	0	0	0	0	0	1	0	0	0	0	1
MLT1E1A:Rps6ka6	Rps6ka6							X		chrX	111450354	111462849	MLT1E1A	ERVL-MaLR	LTR	NA	NA	NA	-	internal	-1.63899	-4.53463	-4.53463	-4.53463	-4.53463	5.99164	10.1549	0.0709627	0.083732	1490	9	1	2	0	2	0	0	0	0	0	0	0	0	0	0	0	0	1
MIR:Tirap	Tirap							X	X	chr9	35191696	35199220	MIR	MIR	SINE	NA	NA	NA	-	internal	-3.17542	-4.53457	-4.53457	-4.53457	-4.53457	5.92052	10.2325	0.0689094	0.0815508	1491	9	1	0	1	0	0	0	0	0	0	0	0	0	0	0	0	0	2
ID_B1:Asap1	Asap1							X	X	chr15	64208556	64295668	NA	NA	NA	ID_B1	B4	SINE	-	internal/promoter_tss	-3.1815	-4.53183	-4.53183	-4.53183	-4.53183	5.92	7.72227	0.172221	0.186148	1492	10	0	0	0	1	0	0	0	0	0	0	0	0	0	0	0	0	2
MIR3:Vrtn	Vrtn							X	X	chr12	84642944	84648476	MIR3	MIR	SINE	NA	NA	NA	+	promoter	-2.45109	-4.53193	-4.53193	-4.53193	-4.53193	5.9451	8.1334	0.149036	0.162809	1493	10	0	1	1	0	0	0	0	0	0	0	0	0	0	0	0	0	2
MTA_Mm-int:Gria4	Gria4							X	X	chr9	4665007	4690378	NA	NA	NA	MTA_Mm-int	ERVL-MaLR	LTR	-	promoter_tss	-0.489465	-4.53197	-4.53197	-4.53197	-4.53197	6.11304	9.65401	0.0856536	0.0991294	1494	10	0	0	9	1	0	0	0	0	0	0	0	0	0	0	0	0	2
MTA_Mm:Plcl1	Plcl1									chr1	55458034	55695744	MTA_Mm	ERVL-MaLR	LTR	NA	NA	NA	+	promoter	-4.53331	-1.3004	-0.615007	0.338059	-2.401	6.45375	11.6555	0.0398264	0.0513524	1495	10	0	0	0	0	0	1	1	1	1	1	2	3	3	0	0	1	0
Lx8b:Rac1	Rac1								X	chr5	143517229	143525860	NA	NA	NA	Lx8b	L1	LINE	-	promoter_tss	2.15014	-2.44153	-2.44153	-2.44153	-2.44153	6.05738	9.20554	0.101141	0.114844	1496	2	0	0	7	8	0	0	0	0	0	0	0	0	0	0	0	0	1
B1F:Atg5	Atg5							X	X	chr10	44274694	44286031	B1F	Alu	SINE	NA	NA	NA	+	internal	1.29568	-3.30116	-3.30116	-3.30116	-3.30116	6.09776	8.52243	0.129697	0.143523	1497	4	0	0	14	1	0	0	0	0	0	0	0	0	0	0	0	0	2
MTB_Mm:Reg3g	Reg3g									chr6	78468567	78505252	NA	NA	NA	MTB_Mm	ERVL-MaLR	LTR	-	promoter_tss	1.64976	-2.94786	-2.94786	-2.94786	-2.94786	6.07905	8.42152	0.134484	0.14794	1498	1	2	0	15	0	0	0	0	0	0	0	0	0	0	0	0	0	0
MT2_Mm:Sp110	Sp110									chr1	85589191	85603834	NA	NA	NA	MT2_Mm	ERVL	LTR	-	promoter_tss	0	0	2.40755	5.65883	1.98469	6.3089	14.5096	0.0126767	0.0193258	1499	0	0	0	0	0	0	0	0	0	0	1	11	0	1	1	0	0	0
MIR3:Cep63	Cep63									chr9	102621728	102626262	MIR3	MIR	SINE	NA	NA	NA	-	internal	0	0	2.39186	5.66357	0	6.2792	13.6026	0.0183411	0.0264879	1500	0	0	0	0	0	0	0	0	0	0	1	11	0	1	0	0	0	0
L3:Ddx54	Ddx54				X					chr5	120618925	120619604	NA	NA	NA	L3	CR1	LINE	+	internal	0	0	2.4064	5.65923	2.0013	6.30957	14.2794	0.0139285	0.0208967	1501	0	0	0	0	0	0	0	0	0	0	1	11	0	1	0	1	0	1
ORR1C2:Tmco4	Tmco4			X						chr4	139029913	139036377	NA	NA	NA	ORR1C2	ERVL-MaLR	LTR	+	terminator	0	0	2.39488	5.66276	0	6.2792	14.1783	0.0145155	0.0216673	1502	0	0	0	0	0	0	0	0	0	0	1	11	0	1	0	0	0	1
ORR1A3:Tmbim1	Tmbim1								X	chr1	74295439	74305512	NA	NA	NA	ORR1A3	ERVL-MaLR	LTR	-	promoter_tss	0	0	2.39959	5.6614	2.76506	6.33797	12.587	0.0275725	0.0374408	1503	0	0	0	0	0	0	0	0	0	0	1	11	0	1	2	0	0	1
ORR1A2:Fam169b	Fam169b									chr7	68321905	68325313	NA	NA	NA	ORR1A2	ERVL-MaLR	LTR	+	terminator	0	0	2.40008	5.66126	5.75942	6.73655	14.6321	0.0120555	0.0185086	1504	0	0	0	0	0	0	0	0	0	0	1	11	0	1	0	2	12	0
B1_Mus2:Alox12	Alox12									chr11	70243077	70243167	NA	NA	NA	B1_Mus2	Alu	SINE	-	promoter_tss	0	2.3072	6.05849	5.4323	5.4927	7.05176	17.5585	0.00355378	0.00650292	1505	0	0	0	0	0	0	0	1	0	11	3	0	11	1	8	2	4	0
RLTR18-int:Mapk1ip1l	Mapk1ip1l									chr14	47311113	47313484	NA	NA	NA	RLTR18-int	ERVK	LTR	+	terminator	0	6.10437	3.27232	3.08164	4.61206	6.72947	20.0853	0.00120448	0.00260652	1506	0	0	0	0	0	5	3	8	0	0	2	1	1	0	1	7	0	0
MER34-int:Spam1	Spam1								X	chr6	24791407	24795853	MER34-int	ERV1	LTR	NA	NA	NA	+	internal	2.91815	6.0928	0	0	0	6.46642	22.9714	0.000341841	0.000882659	1507	0	0	3	0	1	4	4	8	0	0	0	0	0	0	0	0	0	1
ORR1B2:Nrg4	Nrg4							X	X	chr9	55282616	55292020	NA	NA	NA	ORR1B2	ERVL-MaLR	LTR	-	promoter_tss	0.822878	-0.0156877	-3.83756	-1.57086	-3.83756	6.31355	9.60456	0.0872474	0.100746	1508	6	0	8	1	6	1	1	1	0	0	0	1	0	0	0	0	0	2
MER50B:Tonsl	Tonsl									chr15	76633503	76633585	MER50B	ERV1	LTR	MER50B	ERV1	LTR	-	internal	0	2.44982	5.6571	6.35442	0	6.92545	23.5238	0.000267966	0.000713529	1509	0	0	0	0	0	0	1	0	4	5	1	4	0	21	0	0	0	0
PB1D11:Cbx1	Cbx1									chr11	96806764	96808183	NA	NA	NA	PB1D11	Alu	SINE	+	terminator	1.43899	3.05649	2.69121	3.38587	4.23009	7.02288	10.4551	0.0633214	0.0757265	1510	0	1	0	1	4	1	3	2	3	1	0	1	1	8	2	8	8	0
L3:Eif4b	Eif4b			X	X					chr15	102073963	102081975	NA	NA	NA	L3	CR1	LINE	+	internal	4.40987	2.45495	5.92405	4.98677	0	6.7993	11.491	0.0424691	0.0542469	1511	0	0	1	10	2	0	1	0	3	9	0	0	0	10	0	0	0	2
ORR1F:Atf7ip2	Atf7ip2									chr16	10237232	10247444	NA	NA	NA	ORR1F	ERVL-MaLR	LTR	+	internal/terminator	0.794739	-0.417388	-2.94761	2.61915	-0.151296	6.49698	6.38171	0.270828	0.283762	1512	1	2	0	6	2	1	0	0	0	0	0	11	0	0	0	2	0	0
RLTR20D:Ranbp17	Ranbp17									chr11	33470266	33478163	RLTR20D	ERVK	LTR	NA	NA	NA	-	terminator	0	6.15232	3.85685	4.87164	2.11627	6.78392	29.2679	2.05432e-05	7.43556e-05	1513	0	0	0	0	0	4	3	10	0	1	2	2	3	3	0	0	1	0
B4A:Atpaf2	Atpaf2				X					chr11	60411729	60416985	B4A	B4	SINE	NA	NA	NA	-	internal	0	3.38372	5.89657	5.43116	3.96667	6.84923	12.125	0.033115	0.0437752	1514	0	0	0	0	0	1	1	0	8	0	4	0	11	1	0	5	0	1
RLTR19-int:LOC108167440	LOC108167440									chr7	75771283	75780624	RLTR19-int	ERVK	LTR	NA	NA	NA	-	terminator	0	3.26562	3.85874	5.76878	2.90111	6.54548	24.4951	0.00017435	0.000491111	1516	0	0	0	0	0	1	0	1	0	1	2	5	4	6	0	1	1	0
MIRc:Slc8b1	Slc8b1				X					chr5	120521861	120523998	NA	NA	NA	MIRc	MIR	SINE	+	internal	0	4.95763	3.34291	2.18823	5.81638	6.67912	24.0101	0.000216141	0.000590131	1517	0	0	0	0	0	2	2	3	0	1	1	0	1	0	14	4	1	1
L1_Mur2:Mcf2	Mcf2									chrX	60081237	60084400	L1_Mur2	L1	LINE	NA	NA	NA	-	internal	0	2.33714	6.55976	5.0556	2.13621	6.90142	30.1595	1.37195e-05	5.17647e-05	1518	0	0	0	0	0	0	0	1	2	2	18	2	5	2	0	0	1	0
Lx4A:Fstl5	Fstl5									chr3	76586801	76588946	Lx4A	L1	LINE	NA	NA	NA	+	promoter	0	2.3424	6.56167	5.22333	3.40251	6.96723	30.2079	1.34222e-05	5.08305e-05	1519	0	0	0	0	0	0	0	1	2	2	18	3	5	2	0	2	1	0
B3:Zmym1	Zmym1									chr4	127059659	127060995	B3	B2	SINE	NA	NA	NA	-	internal	0.906561	-1.16043	-0.170902	1.01006	-1.58776	6.48126	4.27659	0.510319	0.517917	1521	4	1	0	12	2	0	1	0	1	1	0	1	1	5	1	0	0	0
L3b:Dmxl1	Dmxl1								X	chr18	49851496	49852245	NA	NA	NA	L3b	CR1	LINE	+	internal	0	6.07067	0	0	0	6.38917	26.1928	8.18726e-05	0.000251756	1522	0	0	0	0	0	4	3	9	0	0	0	0	0	0	0	0	0	1
MTC:Gramd1c	Gramd1c						X	X		chr16	44009537	44011063	NA	NA	NA	MTC	ERVL-MaLR	LTR	-	promoter_tss	0.672555	0.670083	-3.84118	-3.84118	-1.70131	6.36205	10.7406	0.0567732	0.0697724	1523	5	1	1	11	2	2	1	2	0	0	0	0	0	0	0	0	1	2
B3:Mocos	Mocos									chr18	24689062	24689586	NA	NA	NA	B3	B2	SINE	+	terminator	0.661157	-3.85121	-3.85121	-3.85121	1.06148	6.40685	10.6194	0.0594697	0.0718343	1524	2	4	2	0	12	0	0	0	0	0	0	0	0	0	0	2	6	0
MTC:Nsun4	Nsun4								X	chr4	116048664	116048803	NA	NA	NA	MTC	ERVL-MaLR	LTR	-	promoter_tss	0.919407	-3.59852	-3.59852	-3.59852	-3.59852	6.09993	13.0031	0.0233497	0.0325273	1525	4	1	2	6	6	0	0	0	0	0	0	0	0	0	0	0	0	1
RMER15:Zbtb43	Zbtb43							X		chr2	33455123	33462265	NA	NA	NA	RMER15	ERVL	LTR	-	internal	1.35729	0	5.87264	0	0	6.30858	16.0456	0.00671496	0.0111825	1526	0	0	0	1	0	0	0	0	0	11	1	0	0	0	0	0	0	1
MIRb:Rbm39	Rbm39				X					chr2	156174168	156176402	NA	NA	NA	MIRb	MIR	SINE	-	internal	1.357	0	5.87272	0	0	6.30858	15.5719	0.00817863	0.0133499	1527	0	0	0	1	0	0	0	0	0	11	1	0	0	0	0	0	0	1
B1_Mus2:Gtf2i	Gtf2i									chr5	134311801	134312295	B1_Mus2	Alu	SINE	NA	NA	NA	-	internal	0	0	5.87321	0	0	6.29025	14.3557	0.013501	0.0203761	1528	0	0	0	0	0	0	0	0	0	11	1	0	0	0	0	0	0	0
RLTR9A2:E030030I06Rik	E030030I06Rik							X	X	chr10	22117856	22148488	RLTR9A2	ERVK	LTR	NA	NA	NA	-	terminator	2.11712	2.45656	5.98727	2.09012	0	6.43219	12.9327	0.0240179	0.0333401	1529	0	0	2	0	0	0	1	0	11	0	1	0	0	1	0	0	0	2
ORR1A1:Kctd18	Kctd18									chr1	57967723	57979075	NA	NA	NA	ORR1A1	ERVL-MaLR	LTR	-	promoter_tss	0	5.50143	5.98463	4.89843	3.94017	6.99866	13.5913	0.0184247	0.0265715	1530	0	0	0	0	0	3	4	3	11	0	1	1	0	8	5	0	0	0
MLT1A0:43891	43891									chr8	66121899	66123054	NA	NA	NA	MLT1A0	ERVL-MaLR	LTR	+	terminator	0	2.45846	5.98839	2.08564	0	6.39538	15.4194	0.00871292	0.014041	1531	0	0	0	0	0	0	1	0	11	0	1	0	0	1	0	0	0	0
MTD:4921536K21Rik	4921536K21Rik							X	X	chr11	3890147	3893220	NA	NA	NA	MTD	ERVL-MaLR	LTR	-	promoter_tss	4.53171	0	0	0	0	6.00213	10.014	0.0748398	0.0880089	1533	0	0	4	0	10	0	0	0	0	0	0	0	0	0	0	0	0	2
MLTR14:Ramp3	Ramp3									chr11	6633730	6674762	MLTR14	ERV1	LTR	NA	NA	NA	+	promoter_tss	0.940922	0.211757	-3.60292	-0.544209	-3.60292	6.30978	11.2243	0.0471093	0.0594316	1534	3	2	5	4	5	1	1	1	0	0	0	1	1	0	0	0	0	0
B1F2:Ptges3l	Ptges3l									chr11	101421651	101421864	B1F2	Alu	SINE	NA	NA	NA	-	internal	0	3.81439	4.61137	4.66548	5.8258	6.81463	26.1416	8.37652e-05	0.00025529	1535	0	0	0	0	0	1	1	1	2	1	2	2	1	4	3	7	7	0
L2b:Rps6kb2	Rps6kb2									chr19	4159705	4161067	L2b	L2	LINE	NA	NA	NA	-	internal	0	3.82539	0	0	5.86984	6.45813	20.1187	0.00118723	0.00258285	1536	0	0	0	0	0	1	1	1	0	0	0	0	0	0	0	9	8	0
MT2B2:Ficd	Ficd							X	X	chr5	113734179	113736820	MT2B2	ERVL	LTR	NA	NA	NA	+	promoter_tss	0	0	5.34694	6.13345	2.17863	6.77732	21.2144	0.000737874	0.00171667	1539	0	0	0	0	0	0	0	0	6	0	2	4	1	16	0	0	1	2
MMERVK9C_I-int:Atf7ip2	Atf7ip2									chr16	10212813	10226974	NA	NA	NA	MMERVK9C_I-int	ERVK	LTR	+	terminator	0	6.23754	4.49579	2.18911	2.15357	6.69485	22.9943	0.000338411	0.000874907	1540	0	0	0	0	0	3	2	14	0	1	4	0	1	0	0	0	1	0
B3:Rab29	Rab29				X					chr1	131870861	131871234	NA	NA	NA	B3	B2	SINE	+	terminator	0	0	0	0	5.69068	6.2943	17.4355	0.00374372	0.00675125	1541	0	0	0	0	0	0	0	0	0	0	0	0	0	0	17	1	0	1
ORR1A0:4833420G17Rik	4833420G17Rik									chr13	119464690	119466073	ORR1A0	ERVL-MaLR	LTR	NA	NA	NA	+	internal	-4.41075	-4.41075	-4.41075	-4.41075	-4.41075	5.87694	8.53982	0.128888	0.142937	1542	0	9	0	0	0	0	0	0	0	0	0	0	0	0	0	0	0	0
MTD:Riok1	Riok1									chr13	38043978	38046850	NA	NA	NA	MTD	ERVL-MaLR	LTR	+	internal	-2.3798	-4.41074	-4.41074	-4.41074	-4.41074	5.92383	6.73598	0.241028	0.254636	1543	0	9	0	0	2	0	0	0	0	0	0	0	0	0	0	0	0	0
B4A:Fbxl17	Fbxl17								X	chr17	63060411	63064624	NA	NA	NA	B4A	B4	SINE	-	promoter_tss	-4.41083	-4.41083	-4.41083	-4.41083	-4.41083	5.87694	7.80291	0.167437	0.181457	1544	0	9	0	0	0	0	0	0	0	0	0	0	0	0	0	0	0	1
L1MD1:Bcas1	Bcas1						X	X		chr2	170397714	170406273	L1MD1	L1	LINE	NA	NA	NA	-	terminator	-3.05466	-4.41016	-1.08054	-2.22038	-4.41016	6.04243	7.35532	0.195527	0.209457	1545	0	9	0	0	1	0	0	0	0	1	1	0	1	0	0	0	0	2
L1MEc:Psap	Psap		X	X	X					chr10	60297545	60299097	L1MEc	L1	LINE	NA	NA	NA	+	internal	-4.40789	-4.40789	-4.40789	-4.40789	-4.40789	5.87659	10.4596	0.0632127	0.0756407	1546	1	8	0	0	0	0	0	0	0	0	0	0	0	0	0	0	0	3
MT2B2:Stk3	Stk3									chr15	35073221	35099433	MT2B2	ERVL	LTR	NA	NA	NA	-	internal	-2.32873	-4.40772	-4.40772	-4.40772	-4.40772	5.92577	9.21378	0.100835	0.11456	1547	1	8	1	1	0	0	0	0	0	0	0	0	0	0	0	0	0	0
MTA_Mm:Gm28802	Gm28802									chr1	58855156	58866933	NA	NA	NA	MTA_Mm	ERVL-MaLR	LTR	-	promoter_tss	-1.04245	-4.40773	-4.40773	-4.40773	-4.40773	6.01299	9.72703	0.0833495	0.0967915	1548	1	8	0	5	1	0	0	0	0	0	0	0	0	0	0	0	0	0
L1ME4b:Ttc8	Ttc8									chr12	98970657	98974641	L1ME4b	L1	LINE	NA	NA	NA	+	internal	-0.425609	-1.08008	-0.48812	0.633414	-2.29749	6.62344	4.99958	0.415931	0.425825	1549	2	7	7	1	1	1	1	0	1	1	1	2	4	3	0	0	1	0
B1_Mus1:Med29	Med29							X		chr7	28387303	28390811	B1_Mus1	Alu	SINE	NA	NA	NA	-	internal	0	3.10034	6.52974	4.73595	5.70345	7.16266	15.2803	0.00922945	0.014757	1550	0	0	0	0	0	0	0	2	1	2	19	2	4	1	0	0	13	1
RMER15:Steap3	Steap3			X	X					chr1	120244267	120272436	NA	NA	NA	RMER15	ERVL	LTR	-	promoter_tss	0	0	2.40268	5.53316	1.98137	6.26788	13.0112	0.0232742	0.0324664	1551	0	0	0	0	0	0	0	0	0	0	1	10	0	1	1	0	0	2
L1MC4:Ccdc138	Ccdc138									chr10	58499213	58499361	L1MC4	L1	LINE	NA	NA	NA	+	internal	-0.0105211	-4.40263	-4.40263	-4.40263	-4.40263	6.15175	11.5946	0.0407857	0.0523912	1552	3	6	10	0	2	0	0	0	0	0	0	0	0	0	0	0	0	0
MTC-int:Mbtps2	Mbtps2									chrX	157576187	157583957	NA	NA	NA	MTC-int	ERVL-MaLR	LTR	-	promoter_tss	-0.211221	1.1842	-1.88299	-4.39981	-4.39981	6.57345	18.8881	0.00201656	0.00408303	1553	4	5	1	8	2	3	3	5	0	1	0	0	0	0	0	0	0	0
MLT1K:Zfp518a	Zfp518a							X		chr19	40908203	40911032	NA	NA	NA	MLT1K	ERVL-MaLR	LTR	+	internal	1.6786	-2.93421	-2.93421	2.35715	2.49466	6.7875	6.1606	0.290904	0.30414	1554	3	0	12	2	0	0	0	0	0	0	0	9	0	0	15	0	0	1
IAPLTR2_Mm:Mpv17l	Mpv17l									chr16	13930468	13944665	IAPLTR2_Mm	ERVK	LTR	NA	NA	NA	+	promoter	-0.267323	-4.39253	-4.39253	-4.39253	-4.39253	6.1064	12.4691	0.0288957	0.0389018	1555	7	2	7	2	1	0	0	0	0	0	0	0	0	0	0	0	0	0
MLT1J2:Rbpms2	Rbpms2								X	chr9	65649426	65650932	NA	NA	NA	MLT1J2	ERVL-MaLR	LTR	+	internal	0	3.34822	6.0509	4.28042	0	6.60952	25.9847	8.98462e-05	0.000272201	1556	0	0	0	0	0	1	1	0	3	6	5	3	0	2	0	0	0	1
Lx8:Nme7	Nme7									chr1	164312938	164328292	Lx8	L1	LINE	NA	NA	NA	+	internal	-4.39083	-1.95578	-0.968526	0.395451	1.08586	6.69636	14.9459	0.0105962	0.0165793	1557	8	1	0	0	0	0	1	0	1	1	0	1	1	6	2	9	3	0
PB1D10:Zscan21	Zscan21									chr5	138117007	138117835	NA	NA	NA	PB1D10	Alu	SINE	+	internal	-4.39032	-0.138154	-1.82558	1.05418	-1.595	6.58365	11.8082	0.0375124	0.0488306	1558	8	1	0	0	0	2	1	1	1	0	0	8	0	3	2	0	0	0
B1_Mur4:Gdf15	Gdf15									chr8	70630174	70630429	NA	NA	NA	B1_Mur4	Alu	SINE	-	promoter_tss	-4.38965	-4.38965	-4.38965	-4.38965	-4.38965	5.87409	10.6156	0.0595578	0.0718558	1559	8	1	0	0	0	0	0	0	0	0	0	0	0	0	0	0	0	0
MERVL-int:Tigar	Tigar									chr6	127092742	127099063	NA	NA	NA	MERVL-int	ERVL	LTR	-	promoter_tss	0	0	0	4.92979	5.88114	6.60741	15.0106	0.0103171	0.0161922	1560	0	0	0	0	0	0	0	0	0	0	0	7	0	0	1	15	3	0
MIRb:Pak4	Pak4								X	chr7	28568298	28569792	NA	NA	NA	MIRb	MIR	SINE	-	internal	-2.26309	-4.38677	-4.38677	-4.38677	-4.38677	5.92494	6.88347	0.229452	0.243503	1561	9	0	2	0	0	0	0	0	0	0	0	0	0	0	0	0	0	1
L1MB3:Sin3a	Sin3a							X	X	chr9	57081202	57086580	L1MB3	L1	LINE	NA	NA	NA	+	internal	-0.619381	-4.38727	-4.38727	-4.38727	-4.38727	6.05571	10.5723	0.0605522	0.0728836	1562	9	0	2	1	5	0	0	0	0	0	0	0	0	0	0	0	0	2
MTA_Mm:Tnfsf11	Tnfsf11									chr14	78299999	78325177	NA	NA	NA	MTA_Mm	ERVL-MaLR	LTR	-	promoter_tss	-3.0356	-4.38687	-4.38687	-4.38687	-4.38687	5.89745	7.782	0.168666	0.182692	1563	9	0	0	0	1	0	0	0	0	0	0	0	0	0	0	0	0	0
B2_Mm2:Git2	Git2									chr5	114761380	114761572	B2_Mm2	B2	SINE	NA	NA	NA	-	terminator	0	2.33893	6.29088	5.57775	2.13389	6.8939	29.6807	1.70441e-05	6.30293e-05	1564	0	0	0	0	0	0	0	1	2	2	14	4	5	4	0	0	1	0
B1_Mur1:Fam228b	Fam228b									chr12	4761987	4762326	B1_Mur1	Alu	SINE	NA	NA	NA	-	internal/terminator	-1.69541	3.26266	4.4573	1.85367	1.63566	6.81521	26.6261	6.74467e-05	0.000213182	1565	0	1	0	0	0	2	2	3	7	1	7	1	1	1	2	1	0	0
B3:Raet1e	Raet1e									chr10	22182115	22183554	NA	NA	NA	B3	B2	SINE	+	terminator	0	0	2.41768	5.42091	0	6.21058	17.4376	0.00374054	0.00675125	1566	0	0	0	0	0	0	0	0	0	0	1	5	5	1	0	0	0	0
L1MA9:Lmbr1	Lmbr1									chr5	29363955	29364920	NA	NA	NA	L1MA9	L1	LINE	-	internal	0.42414	3.39437	-2.45028	-2.45028	0.86835	6.47903	20.0092	0.00124477	0.00267672	1567	1	1	1	1	2	4	4	5	0	0	0	0	0	0	3	0	0	0
Lx8:Nme7	Nme7									chr1	164308250	164312852	NA	NA	NA	Lx8	L1	LINE	+	internal	-4.23012	-1.79724	-0.811479	0.559346	1.57738	6.77007	18.0151	0.00292752	0.00559512	1568	7	1	0	0	0	0	1	0	1	1	0	1	1	6	5	10	3	0
B3A:Haus1	Haus1									chr18	77764208	77764541	NA	NA	NA	B3A	B2	SINE	-	promoter_tss	0	0	5.85175	0	0	6.28422	15.6597	0.00788594	0.0129324	1569	0	0	0	0	0	0	0	0	0	10	2	0	0	0	0	0	0	0
ID:Gabpb2	Gabpb2				X					chr3	95208936	95216213	ID	ID	SINE	RSINE1	B4	SINE	-	internal	0	5.62356	5.05985	5.43725	0	6.83651	12.4805	0.0287656	0.0387776	1570	0	0	0	0	0	3	1	8	0	0	8	10	0	0	0	0	0	1
B4A:Dffb	Dffb				X					chr4	153971660	153971885	NA	NA	NA	B4A	B4	SINE	-	internal	0	0	0	5.43956	3.27923	6.25817	11.2227	0.0471384	0.0594316	1571	0	0	0	0	0	0	0	0	0	0	0	10	0	0	1	2	0	1
B1_Mur4:Rnf14	Rnf14							X	X	chr18	38297575	38298308	NA	NA	NA	B1_Mur4	Alu	SINE	+	internal	-1.58255	0.879729	2.66714	2.36828	-2.94181	6.71919	14.462	0.0129263	0.0196537	1572	2	1	0	0	1	1	1	1	6	0	4	0	10	1	0	0	0	2
RLTR40:Hsbp1l1	Hsbp1l1									chr18	80236921	80250016	NA	NA	NA	RLTR40	ERVK	LTR	-	promoter_tss	0	0	5.74715	5.30714	5.12938	6.86468	14.2827	0.0139101	0.0208855	1573	0	0	0	0	0	0	0	0	0	10	1	0	10	1	10	2	0	0
MT2C_Mm:Clybl	Clybl									chr14	122168405	122371240	MT2C_Mm	ERVL	LTR	NA	NA	NA	+	promoter_tss	0	0	2.39443	5.30654	0	6.18365	12.7168	0.0261827	0.0359112	1574	0	0	0	0	0	0	0	0	0	0	1	0	10	1	0	0	0	0
MT2B2:Rabgef1	Rabgef1							X		chr5	130164518	130187400	MT2B2	ERVL	LTR	NA	NA	NA	+	promoter_tss	0	5.69016	6.26971	5.05827	2.11528	7.07829	32.8231	4.08043e-06	1.7679e-05	1575	0	0	0	0	0	3	3	6	5	1	11	3	3	3	0	0	1	1
L1MC4a:Pigk	Pigk				X					chr3	152829911	152841763	L1MC4a	L1	LINE	NA	NA	NA	+	internal	0	3.82872	0	0	5.60751	6.38409	14.1508	0.0146794	0.0218482	1576	0	0	0	0	0	1	1	1	0	0	0	0	0	0	17	0	0	1
RMER19B:Mau2	Mau2									chr8	70023697	70026173	RMER19B	ERVK	LTR	NA	NA	NA	-	internal	0	0	0	0	5.60201	6.26441	9.7403	0.0829372	0.0964652	1577	0	0	0	0	0	0	0	0	0	0	0	0	0	0	17	0	0	0
RLTR6-int:Tctex1d2	Tctex1d2							X	X	chr16	32414842	32422819	RLTR6-int	ERV1	LTR	NA	NA	NA	+	promoter_tss	1.45277	-2.94169	-0.413785	0.14603	-2.94169	6.16718	7.72325	0.172162	0.186148	1578	2	1	0	2	11	0	0	0	0	1	0	1	1	0	0	0	0	2
L1M5:Atf2	Atf2							X	X	chr2	73863238	73870622	NA	NA	NA	L1M5	L1	LINE	-	internal	3.12704	5.90959	0	0	0	6.40698	20.2626	0.00111557	0.00244779	1579	0	0	0	1	4	4	3	7	0	0	0	0	0	0	0	0	0	2
ID_B1:Arv1	Arv1									chr8	124731941	124739713	NA	NA	NA	ID_B1	B4	SINE	+	terminator	0	5.91209	2.45538	2.24355	3.6913	6.50577	24.6519	0.000162633	0.000461283	1580	0	0	0	0	0	4	3	7	0	0	1	1	0	0	2	2	0	0
ORR1A1:Tmem132d	Tmem132d							X		chr5	128269377	128275710	NA	NA	NA	ORR1A1	ERVL-MaLR	LTR	-	promoter_tss	1.94306	-2.45866	-2.45866	-2.45866	-2.45866	6.01708	9.57362	0.0882582	0.101798	1581	0	2	1	1	11	0	0	0	0	0	0	0	0	0	0	0	0	1
MLTR73:Asxl1	Asxl1							X	X	chr2	153391649	153391724	MLTR73	ERV1	LTR	MLTR73	ERV1	LTR	+	internal	0.809072	-3.59393	-3.59393	-3.59393	-3.59393	6.07702	10.5841	0.0602787	0.0726399	1582	5	0	1	2	10	0	0	0	0	0	0	0	0	0	0	0	0	2
MTA_Mm:Adamts19	Adamts19									chr18	58979914	58985240	MTA_Mm	ERVL-MaLR	LTR	NA	NA	NA	+	promoter_tss	0.555307	-3.85081	-1.32725	-0.77363	-3.85081	6.22417	9.19834	0.10141	0.115085	1583	2	4	1	2	10	0	0	0	0	1	0	1	1	0	0	0	0	0
MTA_Mm:Msh3	Msh3									chr13	92274917	92282324	NA	NA	NA	MTA_Mm	ERVL-MaLR	LTR	-	promoter_tss	1.09392	-3.31668	-3.31668	-3.31668	-3.31668	6.05941	11.6203	0.0403784	0.0519332	1584	1	3	1	10	2	0	0	0	0	0	0	0	0	0	0	0	0	0
B4A:Adgre4	Adgre4								X	chr17	55843300	55852206	NA	NA	NA	B4A	B4	SINE	+	internal/terminator	0.583419	-3.84452	-3.84452	-3.84452	-3.84452	6.10132	15.8242	0.0073644	0.0121649	1585	4	2	3	5	5	0	0	0	0	0	0	0	0	0	0	0	0	1
MT2B2:Gm16381	Gm16381									chr12	87644659	87648836	NA	NA	NA	MT2B2	ERVL	LTR	-	promoter_tss	0	5.73927	5.36637	3.42038	3.3123	6.74218	18.9903	0.00193017	0.00393147	1586	0	0	0	0	0	3	5	4	4	4	0	0	0	3	1	2	0	0
ORR1A1:Pxk	Pxk									chr14	8110385	8119820	ORR1A1	ERVL-MaLR	LTR	NA	NA	NA	+	promoter	0	3.26645	3.28133	5.59963	2.02205	6.4175	19.527	0.00153257	0.00321118	1588	0	0	0	0	0	1	0	1	0	0	2	6	2	5	0	1	0	0
B1_Mur2:Cnp	Cnp			X						chr11	100574691	100576235	B1_Mur2	Alu	SINE	NA	NA	NA	+	promoter	0	3.26608	3.85129	5.59811	2.90829	6.4927	20.012	0.00124329	0.00267635	1589	0	0	0	0	0	1	0	1	0	1	2	6	2	5	0	1	1	1
MT2C_Mm:Naalad2	Naalad2			X	X					chr9	18388194	18402868	NA	NA	NA	MT2C_Mm	ERVL	LTR	-	promoter_tss	0	3.21456	5.74686	0	2.00388	6.35354	15.5377	0.00829575	0.0134855	1590	0	0	0	0	0	0	1	1	0	10	1	0	0	0	0	1	0	2
MIRb:Fam109a	Fam109a									chr5	121850546	121851167	NA	NA	NA	MIRb	MIR	SINE	+	internal	0	4.48682	5.75664	5.04472	0	6.71451	20.3207	0.00108787	0.00239729	1591	0	0	0	0	0	1	2	2	1	9	1	1	0	9	0	0	0	0
RSINE1:Gpatch2	Gpatch2									chr1	187226219	187229598	NA	NA	NA	RSINE1	B4	SINE	+	internal	0.343705	1.68343	4.1607	-1.69863	2.72168	6.60044	9.2723	0.0986837	0.112428	1592	0	1	0	2	0	1	1	0	10	0	1	0	0	0	0	7	0	0
MT2_Mm:Gtf2e1	Gtf2e1									chr16	37536193	37586467	NA	NA	NA	MT2_Mm	ERVL	LTR	-	promoter_tss	0	3.38748	5.86119	0	0	6.36411	16.6634	0.00518439	0.00896962	1593	0	0	0	0	0	1	1	0	10	0	1	0	0	0	0	0	0	0
Lx8b:1700024P16Rik	1700024P16Rik									chr4	104836210	104907123	NA	NA	NA	Lx8b	L1	LINE	+	internal	4.51751	0	0	0	0	5.9965	9.06533	0.106487	0.120113	1594	0	0	12	0	1	0	0	0	0	0	0	0	0	0	0	0	0	0
PB1D10:Scaf1	Scaf1									chr7	45010998	45012122	PB1D10	Alu	SINE	NA	NA	NA	-	terminator	2.59851	3.69533	2.55774	3.84882	1.31974	6.92396	6.86102	0.231184	0.245213	1595	0	1	0	12	0	2	2	6	0	2	2	3	5	5	0	0	2	0
ID_B1:Ascc2	Ascc2				X					chr11	4656336	4657510	NA	NA	NA	ID_B1	B4	SINE	+	terminator	0	0	5.90982	4.17924	5.55535	6.83937	24.43	0.000179462	0.000502052	1596	0	0	0	0	0	0	0	0	8	1	3	1	1	3	8	8	0	1
L2b:Aacs	Aacs				X					chr5	125494598	125494906	L2b	L2	LINE	NA	NA	NA	+	promoter	0	4.22113	5.91681	4.95539	2.91254	6.76689	21.1705	0.00075212	0.00174584	1597	0	0	0	0	0	1	2	1	9	0	3	1	2	6	0	1	1	1
B3A:Zfp788	Zfp788									chr7	41634710	41647482	B3A	B2	SINE	NA	NA	NA	+	internal	0	5.82159	0	0	2.81273	6.34616	24.4119	0.000180904	0.000504845	1598	0	0	0	0	0	4	3	6	0	0	0	0	0	0	0	2	0	0
MT2_Mm:Iqcf1	Iqcf1							X		chr9	106499305	106500497	MT2_Mm	ERVL	LTR	NA	NA	NA	+	internal/promoter_tss	0	5.82273	5.59344	4.44455	4.03595	6.93661	27.2413	5.11912e-05	0.00016723	1599	0	0	0	0	0	4	3	6	5	1	4	1	2	3	4	0	1	1
B1_Mus2:Chic1	Chic1				X					chrX	103365957	103366213	B1_Mus2	Alu	SINE	NA	NA	NA	+	promoter_tss	0	5.01193	4.29644	5.24772	5.63991	6.93959	21.5027	0.000650726	0.00154272	1600	0	0	0	0	0	3	2	2	2	0	2	5	2	3	12	5	0	1
B4A:Wdr20	Wdr20							X	X	chr12	110779890	110793113	B4A	B4	SINE	NA	NA	NA	+	internal/promoter	0	0	2.39673	5.39564	0	6.19435	13.3539	0.0202789	0.0288791	1602	0	0	0	0	0	0	0	0	0	0	1	9	0	1	0	0	0	2
PB1D10:Ggnbp1	Ggnbp1				X					chr17	27018170	27025336	NA	NA	NA	PB1D10	Alu	SINE	+	internal	0	0	2.39859	5.39503	0	6.19435	13.6711	0.0178395	0.0258477	1603	0	0	0	0	0	0	0	0	0	0	1	9	0	1	0	0	0	1
L2b:Slc27a1	Slc27a1									chr8	71584546	71584632	NA	NA	NA	L2b	L2	LINE	+	internal	0	2.54129	4.63938	5.394	4.59927	6.62911	9.78922	0.0814329	0.094889	1604	0	0	0	0	0	1	0	0	3	0	2	9	0	1	0	8	0	0
ORR1D1:Magi1	Magi1							X		chr6	93815825	93888198	NA	NA	NA	ORR1D1	ERVL-MaLR	LTR	-	promoter_tss	0	0	2.39622	5.3958	0	6.19435	13.2672	0.020999	0.0297184	1605	0	0	0	0	0	0	0	0	0	0	1	9	0	1	0	0	0	1
B1_Mur1:Sp140	Sp140									chr1	85621707	85622500	NA	NA	NA	B1_Mur1	Alu	SINE	+	terminator	0	5.4856	0	5.38454	2.01	6.57663	18.8617	0.00203953	0.00411134	1606	0	0	0	0	0	4	2	4	0	0	0	9	0	1	0	1	0	0
B3A:LOC666331	LOC666331									chr11	101610909	101611091	NA	NA	NA	B3A	B2	SINE	+	internal	0	3.26885	6.05226	0	0	6.44112	20.0923	0.00120087	0.00260147	1608	0	0	0	0	0	1	0	1	7	0	7	0	0	0	0	0	0	0
IAPLTR3-int:Txndc11	Txndc11							X	X	chr16	11106271	11122669	IAPLTR3-int	ERVK	LTR	NA	NA	NA	-	terminator	0	4.4864	4.75882	5.6018	5.60241	6.98029	13.8677	0.0164718	0.0240778	1609	0	0	0	0	0	1	2	2	5	0	0	1	1	13	3	0	10	2
L1MEc:Psap	Psap		X	X	X					chr10	60296002	60297536	NA	NA	NA	L1MEc	L1	LINE	+	internal	-2.83303	-4.24918	-4.24918	-4.24918	-4.24918	5.87951	6.69303	0.244489	0.258121	1610	0	8	1	0	0	0	0	0	0	0	0	0	0	0	0	0	0	3
MTA_Mm:Akr1cl	Akr1cl							X		chr1	65021996	65024172	NA	NA	NA	MTA_Mm	ERVL-MaLR	LTR	-	promoter_tss	-0.332094	-0.426746	-1.68531	-4.24787	-4.24787	6.23944	8.753	0.119331	0.133424	1611	0	8	1	6	2	1	1	1	1	0	0	0	0	0	0	0	0	1
PB1D11:Tmem231	Tmem231									chr8	111918956	111926845	NA	NA	NA	PB1D11	Alu	SINE	-	internal	1.41804	0	5.63588	0	0	6.22434	11.1771	0.04798	0.0602698	1612	0	0	1	0	0	0	0	0	0	10	0	0	0	0	0	0	0	0
L2b:Cdk2	Cdk2									chr10	128700119	128701342	L2b	L2	LINE	NA	NA	NA	-	internal	2.02914	0	5.6363	0	0	6.24158	9.43602	0.0928864	0.106595	1614	0	0	0	0	2	0	0	0	0	10	0	0	0	0	0	0	0	0
MT2_Mm:Guca1a	Guca1a									chr17	47395697	47402809	NA	NA	NA	MT2_Mm	ERVL	LTR	-	promoter_tss	0	0	5.6359	0	4.99928	6.51639	11.708	0.039016	0.0505626	1615	0	0	0	0	0	0	0	0	0	10	0	0	0	0	10	1	0	0
RSINE1:Tulp1	Tulp1			X						chr17	28356450	28356920	NA	NA	NA	RSINE1	B4	SINE	-	promoter_tss	0	0	5.63447	0	5.23313	6.55729	16.5405	0.00545888	0.0093968	1616	0	0	0	0	0	0	0	0	0	10	0	0	0	0	5	1	5	1
MT2A:Tmem229b	Tmem229b				X					chr12	78977941	79009161	NA	NA	NA	MT2A	ERVL	LTR	-	promoter_tss	0	2.46966	5.76425	5.44007	0	6.67101	9.23885	0.0999081	0.113696	1617	0	0	0	0	0	0	1	0	10	0	0	0	0	14	0	0	0	1
RLTR15:Zkscan14	Zkscan14							X		chr5	145198800	145199402	NA	NA	NA	RLTR15	ERVK	LTR	-	promoter_tss	0	3.92021	5.75917	2.07778	0	6.39847	12.4848	0.0287162	0.0387476	1618	0	0	0	0	0	1	2	0	10	0	0	0	0	1	0	0	0	1
ORR1B1:Braf	Braf									chr6	39688345	39705638	NA	NA	NA	ORR1B1	ERVL-MaLR	LTR	-	promoter_tss	0	5.53508	5.75717	4.04371	0	6.75225	14.2926	0.0138539	0.020821	1619	0	0	0	0	0	3	5	2	10	0	0	0	0	5	0	0	0	0
ORR1A4-int:1700049G17Rik	1700049G17Rik									chr7	27920795	27922073	NA	NA	NA	ORR1A4-int	ERVL-MaLR	LTR	-	promoter_tss	0	2.47013	5.76453	6.07667	0	6.85347	9.6759	0.0849569	0.0983787	1620	0	0	0	0	0	0	1	0	10	0	0	0	0	22	0	0	0	0
B2_Mm2:Abl1	Abl1								X	chr2	31689942	31690554	NA	NA	NA	B2_Mm2	B2	SINE	+	internal	0	5.87252	0	0	0	6.30997	25.0694	0.000135098	0.000391879	1621	0	0	0	0	0	3	3	8	0	0	0	0	0	0	0	0	0	1
RMER12:Sbf2	Sbf2							X	X	chr7	110422554	110428187	NA	NA	NA	RMER12	ERVK	LTR	-	internal	2.10648	4.19269	2.61675	2.75432	0.3982	6.80165	15.6758	0.00783327	0.0128564	1622	0	1	5	1	2	3	3	8	1	2	1	1	2	3	0	0	1	2
L1MA9:Lmbr1	Lmbr1									chr5	29365206	29378126	L1MA9	L1	LINE	NA	NA	NA	-	internal	-1.10947	-1.92664	-4.23461	-4.23461	-0.312398	6.17067	6.55398	0.25598	0.269738	1623	5	3	0	0	5	0	0	1	0	0	0	0	0	0	1	0	3	0
L1_Mur3:1700010I14Rik	1700010I14Rik						X	X	X	chr17	9004404	9005191	L1_Mur3	L1	LINE	NA	NA	NA	+	internal	-4.22537	-4.22537	-4.22537	-4.22537	-4.22537	5.85028	7.37063	0.194503	0.208578	1624	8	0	0	0	0	0	0	0	0	0	0	0	0	0	0	0	0	3
B4:Csnk2a1	Csnk2a1									chr2	152248811	152250401	B4	B4	SINE	NA	NA	NA	+	internal/promoter_tss	-2.86988	1.55563	-4.22623	-4.22623	-4.22623	6.42493	17.6513	0.00341665	0.00632885	1625	8	0	0	0	1	3	3	7	0	0	0	0	0	0	0	0	0	0
MIRb:Lama2	Lama2								X	chr10	27070368	27101328	NA	NA	NA	MIRb	MIR	SINE	-	internal	-2.80841	-4.22546	-4.22546	-4.22546	-4.22546	5.87665	6.40161	0.269078	0.282187	1626	8	0	1	0	0	0	0	0	0	0	0	0	0	0	0	0	0	1
RMER6A:Pah	Pah								X	chr10	87575711	87576156	RMER6A	ERVK	LTR	NA	NA	NA	+	promoter_tss	-1.66714	-1.77727	-4.22628	-2.03666	-4.22628	6.01913	5.98842	0.307347	0.319698	1627	8	0	2	1	0	0	1	0	0	0	0	0	1	0	0	0	0	1
B1_Mus2:Ndufs1	Ndufs1				X					chr1	63170914	63172153	NA	NA	NA	B1_Mus2	Alu	SINE	-	internal	0	0	5.72456	4.66652	4.75974	6.69809	12.1059	0.0333646	0.0440482	1628	0	0	0	0	0	0	0	0	0	9	2	0	6	1	0	9	0	1
MIRc:Il6st	Il6st							X	X	chr13	112472673	112475030	MIRc	MIR	SINE	NA	NA	NA	+	internal	0.222796	-4.06365	-4.06365	-4.06365	-4.06365	6.09646	10.3212	0.0666281	0.0791716	1630	1	6	0	6	6	0	0	0	0	0	0	0	0	0	0	0	0	2
B4A:Myo10	Myo10							X	X	chr15	25799553	25800040	B4A	B4	SINE	NA	NA	NA	+	internal	1.34713	-2.94137	-2.94137	-2.94137	-2.94137	6.01525	9.63324	0.0863199	0.0997875	1631	2	1	0	8	4	0	0	0	0	0	0	0	0	0	0	0	0	2
MLTR14:Pnpla3	Pnpla3									chr15	84186081	84186402	NA	NA	NA	MLTR14	ERV1	LTR	+	terminator	0	0	4.73601	0	5.5756	6.46009	16.1926	0.00631526	0.0106206	1632	0	0	0	0	0	0	0	0	1	0	5	0	0	0	4	0	9	0
B1_Mur2:Sh2d6	Sh2d6							X	X	chr6	72521551	72522165	NA	NA	NA	B1_Mur2	Alu	SINE	-	internal/promoter_tss	1.85938	2.11793	-2.44384	-0.183853	-2.44384	6.26951	10.4149	0.0642965	0.076758	1633	2	0	1	9	2	2	2	1	0	0	0	1	0	0	0	0	0	2
MIRb:Sergef	Sergef			X						chr7	46443535	46511954	NA	NA	NA	MIRb	MIR	SINE	-	promoter_tss	2.60491	-1.69878	-1.69878	-1.69878	-1.69878	5.97592	9.52651	0.0898183	0.103423	1634	0	1	2	0	10	0	0	0	0	0	0	0	0	0	0	0	0	1
LTR50:Apbb1	Apbb1									chr7	105567146	105567253	NA	NA	NA	LTR50	ERVL	LTR	-	internal	0.995367	-3.31581	-3.31581	-3.31581	-1.29008	6.07402	11.9169	0.035944	0.0471188	1635	1	3	2	5	5	0	0	0	0	0	0	0	0	0	0	1	0	0
LFSINE_Vert:Hmgcs1	Hmgcs1							X	X	chr13	119695047	119699663	LFSINE_Vert	tRNA	SINE	NA	NA	NA	+	internal	0.475573	-3.83694	-3.83694	-3.83694	-3.83694	6.07936	11.4144	0.0437551	0.0556462	1636	6	0	2	9	1	0	0	0	0	0	0	0	0	0	0	0	0	2
B1_Mur4:Senp8	Senp8								X	chr9	59740032	59750261	B1_Mur4	Alu	SINE	NA	NA	NA	-	internal	0.992793	-3.32219	-3.32219	-3.32219	-3.32219	6.04125	9.17916	0.102128	0.115836	1637	0	4	3	0	9	0	0	0	0	0	0	0	0	0	0	0	0	1
RLTR10-int:Trim30a	Trim30a							X	X	chr7	104412315	104416945	NA	NA	NA	RLTR10-int	ERVK	LTR	-	promoter_tss	1.86967	-0.0150207	0.972381	3.41357	-2.45029	6.66855	15.4548	0.00858598	0.0139021	1638	1	1	3	4	5	0	1	0	1	1	0	1	1	16	0	0	0	2
B1F:E2f6	E2f6									chr12	16813912	16816399	B1F	Alu	SINE	NA	NA	NA	+	internal/promoter_tss	0	0	2.38407	5.29064	2.78224	6.22531	8.92122	0.112248	0.126056	1639	0	0	0	0	0	0	0	0	0	0	1	9	0	0	0	2	0	0
MTEa:Ocm	Ocm									chr5	144033663	144050480	MTEa	ERVL-MaLR	LTR	MT2B2	ERVL	LTR	-	internal/promoter_tss	1.36204	5.54493	5.38269	0	4.21427	6.70451	17.4679	0.00369273	0.00668349	1640	0	0	0	1	0	4	4	2	7	0	1	0	0	0	2	4	0	0
MIRb:Tmem120b	Tmem120b									chr5	123099758	123099836	MIRb	MIR	SINE	NA	NA	NA	+	promoter	0	5.55277	5.25079	0	4.90496	6.75344	12.3772	0.0299698	0.0401627	1641	0	0	0	0	0	4	4	2	7	0	0	0	0	0	0	10	0	0
MIR3:Lsm6	Lsm6									chr8	78810060	78819986	NA	NA	NA	MIR3	MIR	SINE	-	internal/promoter_tss	0	3.04768	0	0	5.60477	6.29709	9.22605	0.10038	0.11417	1642	0	0	0	0	0	0	0	2	0	0	0	0	0	0	0	0	12	0
B4A:Slc13a2	Slc13a2			X	X					chr11	78402610	78403071	B4A	B4	SINE	NA	NA	NA	-	internal/terminator	0	0	4.21639	3.55848	5.58958	6.48611	13.8565	0.0165468	0.0241529	1643	0	0	0	0	0	0	0	0	1	0	3	1	1	1	0	0	12	2
MT2A:Wdr27	Wdr27									chr17	14939580	14943096	MT2A	ERVL	LTR	NA	NA	NA	-	terminator	0	0	5.53141	2.07225	5.59908	6.63289	12.1102	0.0333086	0.0440026	1644	0	0	0	0	0	0	0	0	7	0	2	0	0	1	0	0	12	0
RSINE1:Ahnak	Ahnak									chr19	9046865	9076575	RSINE1	B4	SINE	NA	NA	NA	+	internal	3.2398	0	5.80838	0	0	6.36939	12.5421	0.0280694	0.038065	1645	0	0	5	0	0	0	0	0	0	8	4	0	0	0	0	0	0	0
MT2_Mm:43891	43891									chr8	66060494	66121750	MT2_Mm	ERVL	LTR	NA	NA	NA	+	promoter_tss	0	3.35242	5.88095	4.37659	2.1454	6.59128	19.963	0.00126986	0.00271533	1646	0	0	0	0	0	1	1	0	7	1	4	0	2	4	0	0	1	0
B4A:Maats1	Maats1									chr16	38323659	38324136	B4A	B4	SINE	NA	NA	NA	-	terminator	0	4.77313	3.89605	5.43194	5.71306	6.92928	20.7263	0.000912383	0.00206539	1647	0	0	0	0	0	2	2	2	0	2	1	3	4	5	0	15	2	0
MTB_Mm:Rbl1	Rbl1									chr2	157147676	157148466	NA	NA	NA	MTB_Mm	ERVL-MaLR	LTR	-	promoter_tss	2.65	-1.69874	-1.69874	-1.69874	-1.69874	5.98404	9.78607	0.0815289	0.0949468	1648	0	1	6	0	6	0	0	0	0	0	0	0	0	0	0	0	0	0
B3:Atp5s	Atp5s									chr12	69725554	69740898	B3	B2	SINE	NA	NA	NA	+	internal/promoter_tss	0	3.81665	2.519	4.1865	5.5921	6.55919	22.2903	0.000461064	0.00113737	1649	0	0	0	0	0	1	1	1	0	1	0	1	1	3	8	7	1	0
RLTR30B_MM:Zfp457	Zfp457									chr13	67288477	67292745	RLTR30B_MM	ERV1	LTR	NA	NA	NA	-	terminator	0	0	5.88778	0	0	6.30536	17.2904	0.00398076	0.00712843	1650	0	0	0	0	0	0	0	0	0	7	6	0	0	0	0	0	0	0
PB1D11:Mospd1	Mospd1							X		chrX	53349340	53355655	PB1D11	Alu	SINE	NA	NA	NA	-	internal	2.70481	-1.68722	-1.68722	-1.68722	-1.68722	5.99196	11.1467	0.0485468	0.0607578	1651	1	0	10	1	1	0	0	0	0	0	0	0	0	0	0	0	0	1
MIR3:Cdk12	Cdk12						X	X	X	chr11	98263570	98267751	NA	NA	NA	MIR3	MIR	SINE	+	internal	0	2.2827	4.49939	0	5.5579	6.44734	13.8937	0.0162989	0.0239277	1652	0	0	0	0	0	0	0	1	1	0	4	0	0	0	1	0	11	3
L2b:Phf14	Phf14							X	X	chr6	12047944	12067190	NA	NA	NA	L2b	L2	LINE	+	internal	4.40713	0	0	0	0	5.9727	8.63769	0.124418	0.138656	1653	0	0	11	1	0	0	0	0	0	0	0	0	0	0	0	0	0	2
RLTR21:Tex43	Tex43							X	X	chr18	56588470	56592376	RLTR21	ERVK	LTR	NA	NA	NA	+	promoter_tss	0	5.78379	2.52613	2.91562	2.79444	6.43502	18.2213	0.00268151	0.0051978	1654	0	0	0	0	0	3	3	7	0	1	0	0	0	2	2	0	0	2
RMER19B:Scgb1b27	Scgb1b27									chr7	34018910	34021749	RMER19B	ERVK	LTR	NA	NA	NA	+	internal	0	2.32699	6.26465	4.73141	2.14933	6.73762	23.8958	0.000227353	0.000618266	1655	0	0	0	0	0	0	0	1	1	2	15	2	4	1	0	0	1	0
ORR1A3:Cr1l	Cr1l									chr1	195098841	195111079	ORR1A3	ERVL-MaLR	LTR	NA	NA	NA	-	terminator	0	5.62383	0	0	3.30866	6.30548	24.2048	0.000198293	0.000545773	1656	0	0	0	0	0	4	3	4	0	0	0	0	0	0	2	1	0	0
PB1D9:Gtf2h1	Gtf2h1				X					chr7	46796288	46797396	NA	NA	NA	PB1D9	Alu	SINE	+	internal	-1.69667	3.16345	4.32092	2.20715	3.40596	6.95441	17.5611	0.00354994	0.00650292	1657	0	1	0	0	0	1	1	5	5	1	8	1	1	2	0	1	8	1
B3:Mcf2	Mcf2									chrX	60148663	60152899	B3	B2	SINE	NA	NA	NA	-	terminator	0	5.60794	4.32742	4.64441	2.03252	6.62285	27.1803	5.26115e-05	0.000171322	1658	0	0	0	0	0	3	4	4	2	1	1	1	2	4	0	1	0	0
MT2_Mm:Osbpl9	Osbpl9									chr4	109172324	109176634	NA	NA	NA	MT2_Mm	ERVL	LTR	-	promoter_tss	0	4.22023	5.63838	2.13173	3.69273	6.51491	19.9989	0.00125035	0.00268569	1659	0	0	0	0	0	1	2	1	3	6	1	0	0	1	1	3	0	0
B1_Mur1:Traf3ip1	Traf3ip1									chr1	91526517	91527617	B1_Mur1	Alu	SINE	NA	NA	NA	+	internal	0	0	5.72179	2.0866	1.98229	6.28803	14.1605	0.0146213	0.0217775	1660	0	0	0	0	0	0	0	0	9	0	1	0	0	1	1	0	0	0
ORR1A0:4833420G17Rik	4833420G17Rik									chr13	119464690	119466866	ORR1A0	ERVL-MaLR	LTR	NA	NA	NA	+	internal	0	0	5.72194	2.08605	0	6.25744	16.1415	0.00645137	0.010814	1661	0	0	0	0	0	0	0	0	9	0	1	0	0	1	0	0	0	0
B3:Snupn	Snupn									chr9	56955916	56957013	B3	B2	SINE	NA	NA	NA	+	promoter_tss	0	3.37913	5.71881	2.09645	0	6.3481	15.9566	0.00696913	0.0115667	1662	0	0	0	0	0	1	1	0	9	0	1	0	0	1	0	0	0	0
RLTR10-int:4930562C15Rik	4930562C15Rik									chr16	4858603	4860963	RLTR10-int	ERVK	LTR	NA	NA	NA	+	promoter_tss	2.85399	3.34205	4.6296	5.46933	0	6.55115	16.8888	0.0047155	0.00829879	1663	0	0	0	1	3	1	1	0	3	0	2	5	2	5	0	0	0	0
RLTR10B:LOC108168405	LOC108168405									chr19	61304270	61313407	RLTR10B	ERVK	LTR	NA	NA	NA	-	terminator	0	0	3.33031	3.09587	5.64664	6.42552	16.2897	0.00606373	0.0102567	1664	0	0	0	0	0	0	0	0	0	1	1	1	1	0	2	15	0	0
MIR:Necap2	Necap2								X	chr4	141070940	141071580	NA	NA	NA	MIR	MIR	SINE	-	internal	0	0	5.71376	4.42382	0	6.43624	20.4777	0.0010163	0.00225171	1665	0	0	0	0	0	0	0	0	1	7	3	0	4	2	0	0	0	1
L3:Dnah17	Dnah17									chr11	118094220	118094504	NA	NA	NA	L3	CR1	LINE	-	internal	0	5.68636	0	0	3.67444	6.35813	22.6071	0.000401221	0.00101547	1666	0	0	0	0	0	3	3	6	0	0	0	0	0	0	2	2	0	0
B1F1:Usp26	Usp26								X	chrX	51798996	51800812	B1F1	Alu	SINE	NA	NA	NA	-	internal	-1.99459	1.62682	1.05035	0.597172	-1.95608	6.86872	13.1168	0.0223083	0.0313328	1667	0	7	1	0	1	3	3	6	4	1	2	1	3	3	0	0	1	1
ORR1A1:Nr2c2	Nr2c2				X					chr6	92145793	92149603	ORR1A1	ERVL-MaLR	LTR	NA	NA	NA	+	promoter_tss	0	4.9577	4.56252	5.18137	2.8246	6.62749	19.9749	0.00126333	0.00270808	1668	0	0	0	0	0	2	2	3	1	1	3	1	7	2	0	2	0	1
MLTR31A_MM:Clhc1	Clhc1									chr11	29559505	29560449	MLTR31A_MM	ERVK	LTR	NA	NA	NA	+	promoter_tss	0	0	5.25861	5.1518	0	6.44602	16.1022	0.00655837	0.0109664	1669	0	0	0	0	0	0	0	0	0	6	2	0	8	2	0	0	0	0
RLTR20A4:Sdhc	Sdhc			X						chr1	171138755	171150558	RLTR20A4	ERVK	LTR	NA	NA	NA	-	internal	0	0	2.3933	5.24254	0	6.15019	12.155	0.032724	0.0433143	1670	0	0	0	0	0	0	0	0	0	0	1	8	0	1	0	0	0	1
RSINE1:Ttc14	Ttc14							X		chr3	33800674	33800955	RSINE1	B4	SINE	NA	NA	NA	+	internal/promoter	0	2.53263	4.63841	5.23684	0	6.38318	13.493	0.019172	0.0274942	1671	0	0	0	0	0	1	0	0	3	0	2	8	0	1	0	0	0	1
L1M5:Rnf170	Rnf170							X	X	chr8	26119959	26120439	NA	NA	NA	L1M5	L1	LINE	+	internal	0	0	2.39413	5.24226	0	6.15019	12.284	0.0310969	0.0414019	1672	0	0	0	0	0	0	0	0	0	0	1	8	0	1	0	0	0	2
ORR1D2:Isoc2b	Isoc2b				X					chr7	4851533	4870182	NA	NA	NA	ORR1D2	ERVL-MaLR	LTR	-	promoter_tss	-2.45768	0.0509703	3.30143	2.76963	0.836715	6.71789	12.7265	0.026081	0.0357958	1673	0	2	0	0	0	1	0	0	7	0	4	8	0	1	2	1	0	1
B1_Mur4:Eif4e1b	Eif4e1b							X	X	chr13	54784101	54784190	NA	NA	NA	B1_Mur4	Alu	SINE	+	internal	4.17707	0	0	0	0	5.92963	11.3243	0.0453155	0.057452	1675	0	0	1	2	8	0	0	0	0	0	0	0	0	0	0	0	0	2
ORR1B1:Pigk	Pigk				X					chr3	152825249	152841763	ORR1B1	ERVL-MaLR	LTR	NA	NA	NA	+	promoter_tss	0	0	2.43248	5.19986	3.39269	6.24929	15.8067	0.00741829	0.0122342	1676	0	0	0	0	0	0	0	0	0	0	1	7	1	1	2	0	1	1
ID_B1:Tulp2	Tulp2									chr7	45522348	45522439	NA	NA	NA	ID_B1	B4	SINE	+	terminator	1.72555	0.0839559	-2.45889	-2.45889	-2.45889	6.02884	6.82931	0.233647	0.247697	1677	0	2	1	10	0	1	0	0	0	0	0	0	0	0	0	0	0	0
RLTR20A4:Depdc1a	Depdc1a									chr3	159516950	159520829	RLTR20A4	ERVK	LTR	NA	NA	NA	+	internal	0	5.00161	5.60318	2.09383	0	6.50187	16.1735	0.00636576	0.0106792	1678	0	0	0	0	0	2	3	2	9	0	0	0	0	1	0	0	0	0
ORR1A4:LOC105242472	LOC105242472									chr11	104989637	104994265	ORR1A4	ERVL-MaLR	LTR	NA	NA	NA	+	promoter_tss	0	2.46506	5.61135	5.64538	0	6.68516	11.7596	0.0382339	0.0496749	1679	0	0	0	0	0	0	1	0	9	0	0	0	1	15	0	0	0	0
MIRb:Grid1	Grid1									chr14	34928045	34945752	MIRb	MIR	SINE	NA	NA	NA	+	internal/promoter	0.879397	-3.31188	-0.79176	-0.24362	-3.31188	6.15106	8.7363	0.120056	0.134014	1680	2	2	2	1	8	0	0	0	0	1	0	1	1	0	0	0	0	0
Lx2B:Galc	Galc		X						X	chr12	98220427	98222599	Lx2B	L1	LINE	NA	NA	NA	-	terminator	1.24975	-2.9418	-2.9418	-2.9418	-2.9418	5.99691	11.8598	0.0367598	0.0479987	1681	2	1	2	3	6	0	0	0	0	0	0	0	0	0	0	0	0	2
MTEa:Ermard	Ermard									chr17	15061182	15074416	NA	NA	NA	MTEa	ERVL-MaLR	LTR	+	terminator	-1.68828	2.87477	0.875147	-1.68828	3.87539	6.5035	18.8324	0.00206527	0.0041488	1682	1	0	0	0	0	2	2	1	1	0	0	0	0	0	4	12	0	0
RSINE1:Adcy10	Adcy10									chr1	165575695	165576538	NA	NA	NA	RSINE1	B4	SINE	+	terminator	4.195	0	0	0	0	5.93276	10.6496	0.0587871	0.0710518	1683	0	0	2	8	1	0	0	0	0	0	0	0	0	0	0	0	0	0
B1F1:Ccdc64	Ccdc64									chr5	115667611	115670153	B1F1	Alu	SINE	NA	NA	NA	-	terminator	0	4.95806	4.28177	5.52212	2.89671	6.67943	25.6149	0.000105967	0.000316817	1684	0	0	0	0	0	2	2	3	1	1	2	3	3	7	0	1	1	0
MTD-int:Akap17b	Akap17b						X	X	X	chrX	36624336	36633204	NA	NA	NA	MTD-int	ERVL-MaLR	LTR	-	promoter_tss	2.58343	-1.68715	-1.68715	-1.68715	-1.68715	5.96791	10.398	0.0647115	0.0771183	1686	1	0	9	1	1	0	0	0	0	0	0	0	0	0	0	0	0	3
B4A:Cntn1	Cntn1							X	X	chr15	92128335	92138104	B4A	B4	SINE	NA	NA	NA	+	internal	0.658098	-3.61039	-3.61039	-1.42097	-3.61039	6.092	9.71639	0.0836818	0.0970671	1687	1	4	9	1	1	0	0	0	0	0	0	0	1	0	0	0	0	2
RMER19B:Ttc23l	Ttc23l									chr15	10515231	10519190	NA	NA	NA	RMER19B	ERVK	LTR	-	promoter_tss	4.28593	0	0	0	0	5.94826	8.98731	0.109572	0.123253	1688	0	0	10	1	0	0	0	0	0	0	0	0	0	0	0	0	0	0
L2b:AA415398	AA415398									chr4	119531748	119533312	L2b	L2	LINE	NA	NA	NA	-	terminator	3.80744	5.58351	0	4.18705	0	6.50968	21.6661	0.000605901	0.00145601	1689	0	0	5	2	1	3	3	5	0	0	0	1	1	3	0	0	0	0
ID_B1:Ubox5	Ubox5									chr2	130592014	130595091	NA	NA	NA	ID_B1	B4	SINE	-	internal	0	5.58175	2.52797	0	5.2504	6.60002	21.1406	0.00076199	0.00176275	1690	0	0	0	0	0	3	3	5	0	1	0	0	0	0	11	2	0	0
RMER19A:Ophn1	Ophn1								X	chrX	98803180	98847392	NA	NA	NA	RMER19A	ERVK	LTR	-	promoter_tss	-1.57341	2.64557	-2.93679	-2.93679	-2.93679	6.27488	20.1034	0.00119509	0.00259444	1691	3	0	0	1	0	3	3	5	0	0	0	0	0	0	0	0	0	1
MTE2b:Ablim1	Ablim1									chr19	57134708	57135297	NA	NA	NA	MTE2b	ERVL-MaLR	LTR	-	promoter_tss	4.29866	0	0	0	0	5.95017	7.07583	0.215061	0.229063	1692	0	0	11	0	0	0	0	0	0	0	0	0	0	0	0	0	0	0
MTA_Mm:5730507C01Rik	5730507C01Rik									chr12	18527486	18531609	MTA_Mm	ERVL-MaLR	LTR	NA	NA	NA	+	promoter_tss	-0.628424	-4.06007	-4.06007	-0.975553	-4.06007	6.06514	8.59844	0.126194	0.140101	1693	2	5	4	0	2	0	0	0	0	0	0	1	1	0	0	0	0	0
Lx8:Ptpn22	Ptpn22			X						chr3	103858173	103859954	Lx8	L1	LINE	NA	NA	NA	+	promoter_tss	0	0	4.63885	5.02241	0	6.29684	14.559	0.0124225	0.0190149	1694	0	0	0	0	0	0	0	0	3	0	2	0	8	1	0	0	0	1
L1MC4:Ccdc138	Ccdc138									chr10	58498062	58499168	NA	NA	NA	L1MC4	L1	LINE	+	internal	-0.392345	-4.05403	-4.05403	-4.05403	-4.05403	6.00235	9.44562	0.0925566	0.106336	1695	4	3	6	0	1	0	0	0	0	0	0	0	0	0	0	0	0	0
ID_B1:Nxpe5	Nxpe5				X					chr5	138244376	138248716	ID_B1	B4	SINE	NA	NA	NA	+	internal	0	0	0	5.12249	4.76825	6.35353	11.4185	0.0436856	0.0555925	1696	0	0	0	0	0	0	0	0	0	0	0	8	0	0	0	5	3	1
B1F:Cep55	Cep55								X	chr19	38055317	38057409	NA	NA	NA	B1F	Alu	SINE	+	internal	-2.68601	-0.225845	-4.04813	-4.04813	-4.04813	6.00429	10.1932	0.0699416	0.0825812	1697	6	1	0	1	0	1	1	1	0	0	0	0	0	0	0	0	0	1
MLT1A0:Baz2b	Baz2b								X	chr2	60001556	60006042	MLT1A0	ERVL-MaLR	LTR	NA	NA	NA	-	internal	-0.436743	0.442378	-1.52692	0.743007	-1.92606	6.53787	4.76274	0.445516	0.454631	1698	7	0	3	1	3	1	2	2	0	1	0	1	1	6	0	0	1	1
MIRb:Pak4	Pak4								X	chr7	28569866	28598034	MIRb	MIR	SINE	NA	NA	NA	-	internal	-2.63016	-4.04404	-4.04404	-4.04404	-4.04404	5.85326	6.66317	0.24692	0.260553	1699	7	0	1	0	0	0	0	0	0	0	0	0	0	0	0	0	0	1
MTA_Mm:Setd4	Setd4									chr16	93586317	93586846	NA	NA	NA	MTA_Mm	ERVL-MaLR	LTR	-	promoter_tss	-0.393491	-4.04401	-4.04401	-4.04401	-4.04401	5.9997	7.54841	0.182943	0.197111	1700	7	0	5	2	0	0	0	0	0	0	0	0	0	0	0	0	0	0
MIR3:Jak3	Jak3									chr8	71688200	71690171	MIR3	MIR	SINE	NA	NA	NA	+	internal	0	4.71312	4.31613	5.58487	3.88373	6.72374	21.1526	0.000758012	0.00175752	1701	0	0	0	0	0	1	2	3	1	2	1	2	3	9	0	1	3	0
RLTR13B4:Adamts17	Adamts17									chr7	67005343	67027806	RLTR13B4	ERVK	LTR	NA	NA	NA	+	internal	0	4.1711	3.91532	5.42029	2.89534	6.51998	23.2603	0.000300993	0.000788131	1703	0	0	0	0	0	1	1	2	1	1	1	3	3	6	0	1	1	0
MTC:Usp9y	Usp9y									chrY	1388689	1391274	MTC	ERVL-MaLR	LTR	NA	NA	NA	-	terminator	0	4.95803	3.91573	5.41977	2.89735	6.62424	24.4113	0.000180954	0.000504845	1704	0	0	0	0	0	2	2	3	1	1	1	3	3	6	0	1	1	0
B3:Zfp568	Zfp568			X	X					chr7	29995253	29997749	B3	B2	SINE	NA	NA	NA	+	promoter	0	4.17114	4.28229	5.42032	2.89523	6.55297	23.6378	0.00025481	0.00068474	1705	0	0	0	0	0	1	1	2	1	1	2	3	3	6	0	1	1	2
PB1D10:Pglyrp1	Pglyrp1									chr7	18875514	18889277	PB1D10	Alu	SINE	NA	NA	NA	+	promoter	0	4.17045	4.28164	5.41984	2.89708	6.55297	22.9322	0.000347788	0.000894624	1707	0	0	0	0	0	1	1	2	1	1	2	3	3	6	0	1	1	0
MIRb:Hinfp	Hinfp									chr9	44298411	44298571	NA	NA	NA	MIRb	MIR	SINE	-	promoter_tss	0	0	5.83355	0	0	6.27773	18.5528	0.00232778	0.00456843	1708	0	0	0	0	0	0	0	0	6	0	6	0	0	0	0	0	0	0
B1_Mur1:Traf3ip1	Traf3ip1									chr1	91526102	91526417	NA	NA	NA	B1_Mur1	Alu	SINE	+	internal	0	0	5.5697	2.07928	0	6.20723	14.0196	0.0154854	0.0228813	1709	0	0	0	0	0	0	0	0	8	0	1	0	0	1	0	0	0	0
RMER19C:Gm5134	Gm5134									chr10	75999262	76000388	RMER19C	ERVK	LTR	NA	NA	NA	+	internal	0	0	5.56944	2.08027	0	6.20723	14.2067	0.0143483	0.0214491	1710	0	0	0	0	0	0	0	0	8	0	1	0	0	1	0	0	0	0
B1F1:Zcchc7	Zcchc7									chr4	44908486	44916183	NA	NA	NA	B1F1	Alu	SINE	+	internal	0	0	5.56899	2.08195	0	6.20723	14.5243	0.0126003	0.019244	1711	0	0	0	0	0	0	0	0	8	0	1	0	0	1	0	0	0	0
B4A:Tasp1	Tasp1									chr2	140027295	140042093	B4A	B4	SINE	NA	NA	NA	-	internal	0	0	5.57026	2.07708	0	6.20723	13.6049	0.0183235	0.0264879	1712	0	0	0	0	0	0	0	0	8	0	1	0	0	1	0	0	0	0
B3A:Zfp788	Zfp788									chr7	41633694	41634679	NA	NA	NA	B3A	B2	SINE	+	internal/terminator	1.35973	5.46861	0	0	2.81547	6.24722	18.7936	0.00209989	0.0042142	1713	0	0	0	0	1	3	3	4	0	0	0	0	0	0	0	2	0	0
RSINE1:Csnk1g1	Csnk1g1								X	chr9	65909168	65936796	NA	NA	NA	RSINE1	B4	SINE	+	internal	0	5.46838	2.55598	0	2.02228	6.24617	21.7069	0.000595205	0.00143199	1714	0	0	0	0	0	3	3	4	1	0	0	0	0	0	0	1	0	1
MT2_Mm:Limch1	Limch1							X	X	chr5	67043960	67044345	MT2_Mm	ERVL	LTR	NA	NA	NA	+	promoter_tss	0	5.46784	2.5446	3.90616	2.02792	6.38418	21.5073	0.000649415	0.00154272	1715	0	0	0	0	0	3	3	4	1	0	0	1	1	2	0	1	0	2
L1Md_T:Adcy10	Adcy10									chr1	165526869	165538377	L1Md_T	L1	LINE	NA	NA	NA	+	promoter	0	2.33324	5.43168	5.48391	2.91479	6.64952	21.2348	0.000731337	0.00170729	1716	0	0	0	0	0	0	0	1	0	7	2	2	3	8	0	1	1	0
RLTR20A4:Sik3	Sik3			X	X					chr9	46155540	46177871	RLTR20A4	ERVK	LTR	NA	NA	NA	+	internal	-2.44441	0.788837	2.816	3.04155	0.465765	6.67435	16.7433	0.00501325	0.00871777	1717	2	0	0	0	0	0	1	1	0	6	2	2	3	8	0	1	1	2
B4:Cntn1	Cntn1							X	X	chr15	92078110	92128127	B4	B4	SINE	NA	NA	NA	+	internal	1.58389	-2.45031	0.0823419	0.648145	-2.45031	6.08838	5.72249	0.334165	0.346184	1719	1	1	0	0	10	0	0	0	0	1	0	1	1	0	0	0	0	2
MTA_Mm:Prss12	Prss12									chr3	123502824	123505277	MTA_Mm	ERVL-MaLR	LTR	NA	NA	NA	+	promoter_tss	2.34696	-1.68699	0.727986	1.26986	0.503409	6.09509	3.81281	0.57667	0.583229	1720	1	0	0	0	10	0	0	0	0	0	1	0	1	1	0	0	1	0
MTA_Mm:Gm32916	Gm32916									chr7	120593656	120593850	MTA_Mm	ERVL-MaLR	LTR	NA	NA	NA	+	promoter_tss	4.03541	0	3.3324	4.20802	2.17186	6.23779	7.70875	0.173034	0.186928	1721	0	0	0	0	10	0	0	0	0	1	1	1	2	2	0	0	1	0
B4A:Osgin1	Osgin1									chr8	119430952	119434134	NA	NA	NA	B4A	B4	SINE	+	internal	4.03689	3.22566	3.33614	4.2091	2.15622	6.31508	5.70605	0.33588	0.347609	1722	0	0	0	0	10	0	1	1	0	1	1	1	2	2	0	0	1	0
MTA_Mm:Nav3	Nav3							X	X	chr10	110217110	110257115	NA	NA	NA	MTA_Mm	ERVL-MaLR	LTR	-	promoter_tss	2.34745	-1.68651	-1.68651	-1.68651	-1.68651	5.92663	8.21735	0.144657	0.15811	1723	1	0	0	1	9	0	0	0	0	0	0	0	0	0	0	0	0	2
L2:Abr	Abr								X	chr11	76425326	76451852	NA	NA	NA	L2	L2	LINE	-	internal/promoter_tss	4.04743	3.82017	4.2331	3.07746	3.31603	6.39178	5.58558	0.348653	0.360098	1724	0	0	0	9	1	1	1	1	1	0	3	1	1	0	1	2	0	1
MTD-int:Akap17b	Akap17b						X	X	X	chrX	36618733	36633329	NA	NA	NA	MTD-int	ERVL-MaLR	LTR	-	promoter_tss	1.09601	-2.94757	-2.94757	-2.94757	-2.94757	5.97231	8.98204	0.109783	0.123423	1725	1	2	0	9	1	0	0	0	0	0	0	0	0	0	0	0	0	3
MTC-int:Npas2	Npas2									chr1	39341830	39345268	MTC-int	ERVL-MaLR	LTR	NA	NA	NA	+	promoter_tss	4.04783	3.35351	3.9195	4.65449	2.14708	6.43421	7.14584	0.210018	0.224158	1726	0	0	0	10	0	1	1	0	1	1	1	1	3	3	0	0	1	0
ID4:Rhbdd3	Rhbdd3								X	chr11	5099898	5100384	NA	NA	NA	ID4	ID	SINE	+	internal	0	4.95697	5.13114	3.74873	5.23299	6.77898	9.22033	0.100592	0.114347	1727	0	0	0	0	0	2	2	3	0	7	0	0	0	4	13	0	0	1
MTA_Mm:Slx4ip	Slx4ip									chr2	136899467	136905542	MTA_Mm	ERVL-MaLR	LTR	NA	NA	NA	+	promoter_tss	1.11406	-2.9353	-2.9353	-2.9353	-2.9353	5.97251	9.15368	0.103089	0.116732	1728	3	0	1	2	7	0	0	0	0	0	0	0	0	0	0	0	0	0
B1F2:Ptk2	Ptk2							X		chr15	73391880	73392343	B1F2	Alu	SINE	NA	NA	NA	-	internal	0	3.59784	5.89558	3.10484	5.33053	6.79655	12.0973	0.033479	0.0441707	1729	0	0	0	0	0	0	0	3	1	1	12	1	1	0	0	0	10	1
MIRb:Crem	Crem									chr18	3276729	3295039	MIRb	MIR	SINE	NA	NA	NA	-	internal	0	5.71505	0	0	4.25744	6.43471	20.7247	0.000913013	0.00206539	1730	0	0	0	0	0	2	2	9	0	0	0	0	0	0	0	1	4	0
PB1D9:Fbxo47	Fbxo47									chr11	97868669	97868778	NA	NA	NA	PB1D9	Alu	SINE	-	promoter_tss	0	5.72772	4.5116	3.90513	2.12553	6.60049	22.6183	0.00039926	0.00101175	1731	0	0	0	0	0	2	2	9	0	1	4	1	1	2	0	0	1	0
MTB_Mm:Prpsap1	Prpsap1									chr11	116485935	116486549	NA	NA	NA	MTB_Mm	ERVL-MaLR	LTR	-	promoter_tss	4.09773	4.73201	5.00212	3.06318	0	6.53123	15.6895	0.00778877	0.0127936	1732	0	0	5	3	2	2	1	3	1	1	5	1	1	0	0	0	0	0
RMER19B:Prep	Prep									chr10	45060178	45072052	RMER19B	ERVK	LTR	NA	NA	NA	+	promoter_tss	0.305814	-3.84399	-3.84399	-1.65412	-3.84399	6.09058	8.21872	0.144586	0.15811	1734	4	2	9	0	1	0	0	0	0	0	0	0	1	0	0	0	0	0
MERVL-int:Parp8	Parp8			X	X					chr13	116938781	117039347	NA	NA	NA	MERVL-int	ERVL	LTR	-	internal	0	0	3.95646	5.06524	0	6.20841	13.6755	0.0178073	0.0258268	1735	0	0	0	0	0	0	0	0	2	0	1	7	0	1	0	0	0	2
MT2_Mm:Ppig	Ppig									chr2	69729292	69731490	MT2_Mm	ERVL	LTR	B1F1	Alu	SINE	+	internal/promoter_tss	0	2.30012	5.43127	4.80648	4.45613	6.62984	12.967	0.0236904	0.0329795	1736	0	0	0	0	0	0	0	1	0	7	2	5	0	2	6	0	1	0
MLT1M:Nf2	Nf2				X					chr11	4768273	4780577	MLT1M	ERVL-MaLR	LTR	NA	NA	NA	-	internal/terminator	3.89572	0	2.5281	3.55576	5.25834	6.45031	10.9633	0.0521126	0.0646272	1737	0	0	0	1	8	0	0	0	0	1	0	1	1	1	8	5	0	1
Lx7:Ddias	Ddias									chr7	92866699	92868111	NA	NA	NA	Lx7	L1	LINE	-	internal	0	2.28982	5.09686	4.85633	0	6.38067	14.1437	0.0147217	0.0218951	1738	0	0	0	0	0	0	0	1	0	6	1	0	7	1	0	0	0	0
MT2B1:1700093K21Rik	1700093K21Rik							X	X	chr11	23518142	23518780	MT2B1	ERVL	LTR	NA	NA	NA	-	internal	-0.842284	2.48366	-2.95326	-2.95326	-2.95326	6.25394	14.1397	0.0147458	0.021915	1739	0	3	2	0	0	3	2	5	0	0	0	0	0	0	0	0	0	2
ORR1A4:Upf3a	Upf3a			X	X					chr8	13796592	13797804	NA	NA	NA	ORR1A4	ERVL-MaLR	LTR	+	internal	0	5.42075	2.57448	4.06615	5.07578	6.64886	14.7792	0.0113486	0.0175951	1740	0	0	0	0	0	2	3	5	1	0	0	0	0	5	2	0	7	2
B1_Mus2:Rcc2	Rcc2			X	X					chr4	140717200	140720544	NA	NA	NA	B1_Mus2	Alu	SINE	+	internal	0	4.16077	2.57931	0	5.24467	6.33863	15.4521	0.0085955	0.0139065	1741	0	0	0	0	0	1	1	2	1	0	0	0	0	0	0	2	8	2
B1_Mur2:Zbp1	Zbp1									chr2	173213909	173215676	B1_Mur2	Alu	SINE	NA	NA	NA	-	terminator	0	0	0	0	5.36868	6.18276	9.41659	0.0935578	0.107185	1742	0	0	0	0	0	0	0	0	0	0	0	0	0	0	0	14	0	0
B4A:Zcrb1	Zcrb1									chr15	93391565	93393706	NA	NA	NA	B4A	B4	SINE	-	internal	-0.0474105	-1.514	0.420954	-0.785765	0.576925	6.49661	2.249	0.813727	0.815722	1743	0	6	5	2	1	0	0	1	1	1	2	1	1	0	2	0	4	0
MTEa:Sh3rf1	Sh3rf1							X	X	chr8	61384929	61464597	NA	NA	NA	MTEa	ERVL-MaLR	LTR	+	terminator	-0.932072	-3.85879	-3.85879	-3.85879	-3.85879	5.90834	6.80156	0.235822	0.249615	1744	0	6	3	1	0	0	0	0	0	0	0	0	0	0	0	0	0	2
MTB:Fxn	Fxn	X			X					chr19	24262053	24263380	NA	NA	NA	MTB	ERVL-MaLR	LTR	-	promoter_tss	0.124869	-3.85101	-3.85101	-3.85101	-3.85101	6.0249	11.4251	0.0435733	0.0554841	1745	2	4	6	1	2	0	0	0	0	0	0	0	0	0	0	0	0	2
MTEb:Smug1	Smug1									chr15	103157918	103158156	NA	NA	NA	MTEb	ERVL-MaLR	LTR	-	internal	-1.68708	-1.68708	3.60133	2.68043	0.319593	6.35329	12.3589	0.0301873	0.0404277	1746	1	0	0	0	0	0	0	0	0	7	1	4	0	1	0	1	0	0
B2_Mm1t:Phkg1	Phkg1				X					chr5	129865756	129865916	B2_Mm1t	B2	SINE	NA	NA	NA	-	terminator	0	2.31527	5.2876	4.17602	2.1644	6.35553	14.4003	0.0132572	0.0200674	1747	0	0	0	0	0	0	0	1	0	7	1	1	1	3	0	0	1	1
RLTR16B_MM:Trappc9	Trappc9									chr15	72994928	72999971	RLTR16B_MM	ERVK	LTR	NA	NA	NA	-	terminator	0	0	5.39843	0	0	6.12005	14.2413	0.0141474	0.0211797	1748	0	0	0	0	0	0	0	0	7	0	1	0	0	0	0	0	0	0
ORR1C1:Cnot10	Cnot10									chr9	114586339	114597478	ORR1C1	ERVL-MaLR	LTR	NA	NA	NA	-	terminator	0	0	5.39768	2.07823	0	6.15556	13.0489	0.0229245	0.032088	1749	0	0	0	0	0	0	0	0	7	0	1	0	0	1	0	0	0	0
RSINE1:Sbno1	Sbno1									chr5	124414527	124419810	NA	NA	NA	RSINE1	B4	SINE	-	internal/promoter_tss	0	0	5.4004	0	0	6.12005	12.7532	0.0258051	0.0354408	1750	0	0	0	0	0	0	0	0	7	0	1	0	0	0	0	0	0	0
L2c:Ahcyl2	Ahcyl2									chr6	29896416	29902927	NA	NA	NA	L2c	L2	LINE	+	terminator	0	2.46272	5.39851	0	4.41391	6.38482	10.8155	0.0551624	0.0680381	1751	0	0	0	0	0	0	1	0	7	0	1	0	0	0	0	7	0	0
MT2C_Mm:Apol7b	Apol7b									chr15	77425582	77440067	NA	NA	NA	MT2C_Mm	ERVL	LTR	-	promoter_tss	0	0	5.39548	2.08581	0	6.15556	14.3648	0.0134509	0.0203197	1752	0	0	0	0	0	0	0	0	7	0	1	0	0	1	0	0	0	0
ORR1E:Plcg2	Plcg2									chr8	117621263	117621955	NA	NA	NA	ORR1E	ERVL-MaLR	LTR	+	terminator	0	0	5.39691	2.08102	0	6.15556	13.5304	0.0188845	0.0271009	1753	0	0	0	0	0	0	0	0	7	0	1	0	0	1	0	0	0	0
L1MA9:LOC101055907	LOC101055907									chrX	169323101	169330697	NA	NA	NA	L1MA9	L1	LINE	+	internal	-0.268016	-3.83729	-0.397187	0.763966	-3.83729	6.3169	7.97388	0.157681	0.171611	1755	6	0	0	6	1	0	0	0	1	1	0	1	1	5	0	0	0	0
MTE2a:Pard3	Pard3							X	X	chr8	127299803	127306329	MTE2a	ERVL-MaLR	LTR	NA	NA	NA	+	promoter_tss	1.44782	-2.44085	-2.44085	-2.44085	-2.44085	5.92574	5.57328	0.349977	0.361263	1756	2	0	0	0	9	0	0	0	0	0	0	0	0	0	0	0	0	2
L1M2:Lca5	Lca5									chr9	83401749	83405809	NA	NA	NA	L1M2	L1	LINE	-	internal	0.957006	0.416861	-2.94176	-2.94176	-0.937351	6.08594	6.43445	0.266209	0.279322	1758	2	1	0	3	6	1	1	0	0	0	0	0	0	0	1	0	0	0
ORR1C1:Ttc6	Ttc6									chr12	57579832	57616289	ORR1C1	ERVL-MaLR	LTR	NA	NA	NA	+	promoter_tss	0.594376	-3.30219	-3.30219	-0.206796	-3.30219	6.05827	7.50701	0.18558	0.199637	1759	4	0	0	3	6	0	0	0	0	0	0	1	1	0	0	0	0	0
ORR1A3:LOC101055907	LOC101055907									chrX	169330779	169360986	ORR1A3	ERVL-MaLR	LTR	Lx8b	L1	LINE	+	internal	1.45853	-2.44403	0.985121	1.45939	-2.44403	6.18816	7.88355	0.162771	0.176587	1760	2	0	0	5	4	0	0	0	1	1	0	1	1	2	0	0	0	0
MTA_Mm:Svopl	Svopl							X	X	chr6	38036811	38038311	NA	NA	NA	MTA_Mm	ERVL-MaLR	LTR	-	promoter_tss	2.20092	-1.69925	-1.69925	-1.69925	-1.69925	5.90505	7.16901	0.208372	0.222517	1761	0	1	0	8	1	0	0	0	0	0	0	0	0	0	0	0	0	2
ORR1A2-int:Adgre4	Adgre4								X	chr17	55809034	55814153	ORR1A2-int	ERVL-MaLR	LTR	NA	NA	NA	+	promoter_tss	2.20647	-1.69745	0.829824	1.38879	0.30535	6.08258	4.44831	0.486829	0.494814	1762	0	1	0	8	1	0	0	0	0	1	0	1	1	0	1	0	0	1
MIRc:Aspm	Aspm									chr1	139461530	139461771	MIRc	MIR	SINE	NA	NA	NA	+	internal	2.20053	-1.69989	-1.69989	-1.69989	-1.69989	5.90522	6.00136	0.306086	0.318548	1763	0	1	0	9	0	0	0	0	0	0	0	0	0	0	0	0	0	0
Lx5c:Zfp951	Zfp951									chr5	104805559	104809529	NA	NA	NA	Lx5c	L1	LINE	-	promoter_tss	3.90484	0	0	0	0	5.88258	7.73512	0.17145	0.185511	1764	0	0	1	0	8	0	0	0	0	0	0	0	0	0	0	0	0	0
L1_Mur2:Pmfbp1	Pmfbp1							X		chr8	109378745	109489837	NA	NA	NA	L1_Mur2	L1	LINE	+	internal/terminator	2.2091	-1.69854	-1.69854	-1.69854	-1.69854	5.90595	8.39038	0.135993	0.149439	1765	0	1	1	1	7	0	0	0	0	0	0	0	0	0	0	0	0	1
MTA_Mm:C1qb	C1qb								X	chr4	136882328	136884242	NA	NA	NA	MTA_Mm	ERVL-MaLR	LTR	-	promoter_tss	3.90844	0	0	0	0	5.88293	9.53379	0.0895755	0.103259	1766	0	0	1	2	6	0	0	0	0	0	0	0	0	0	0	0	0	1
B3A:Sepsecs	Sepsecs									chr5	52644107	52645098	NA	NA	NA	B3A	B2	SINE	-	promoter_tss	3.9086	0	0	0	0	5.88293	9.75073	0.0826143	0.0961561	1767	0	0	1	2	6	0	0	0	0	0	0	0	0	0	0	0	0	0
B3A:Raph1	Raph1									chr1	60483340	60488199	B3A	B2	SINE	NA	NA	NA	-	terminator	0.609923	0.508651	-0.762645	-3.30809	-3.30809	6.16468	8.89926	0.11315	0.126929	1768	3	1	1	6	2	1	1	1	1	0	0	0	0	0	0	0	0	0
B3:Fam47e	Fam47e									chr5	92578573	92579603	NA	NA	NA	B3	B2	SINE	+	internal	3.92007	0	0	0	0	5.88475	7.87101	0.163489	0.177272	1769	0	0	2	0	7	0	0	0	0	0	0	0	0	0	0	0	0	0
MIR3:Runx2	Runx2							X	X	chr17	44610093	44639664	MIR3	MIR	SINE	NA	NA	NA	-	internal/terminator	3.92027	0	0	0	0	5.88475	8.51136	0.130215	0.144018	1770	0	0	2	0	7	0	0	0	0	0	0	0	0	0	0	0	0	2
L1_Rod:Sclt1	Sclt1									chr3	41657396	41658261	NA	NA	NA	L1_Rod	L1	LINE	-	internal	0.609107	-3.3119	-3.3119	-3.3119	-3.3119	5.97418	9.08047	0.105897	0.119514	1771	2	2	2	0	7	0	0	0	0	0	0	0	0	0	0	0	0	0
MIRc:Rps6kb2	Rps6kb2									chr19	4159460	4159565	NA	NA	NA	MIRc	MIR	SINE	-	internal	0	3.82527	0	0	5.20824	6.24733	16.4802	0.00559889	0.00956535	1772	0	0	0	0	0	1	1	1	0	0	0	0	0	0	0	3	7	0
L2:Lin28b	Lin28b								X	chr10	45381431	45419136	NA	NA	NA	L2	L2	LINE	-	internal	1.35934	4.51533	0	4.69485	0	6.23317	12.3405	0.0304082	0.0406437	1773	0	0	0	1	0	2	1	2	0	0	0	0	7	0	0	0	0	1
Lx8:Phactr3	Phactr3							X		chr2	178119302	178178256	NA	NA	NA	Lx8	L1	LINE	+	terminator	1.49434	-2.45698	-2.45698	-2.45698	-2.45698	5.93535	10.491	0.0624598	0.0748274	1774	0	2	4	3	2	0	0	0	0	0	0	0	0	0	0	0	0	1
RMER15:Tet3	Tet3							X	X	chr6	83441273	83459006	NA	NA	NA	RMER15	ERVL	LTR	-	promoter_tss	1.50851	-2.44372	-2.44372	1.06877	-2.44372	6.05707	9.16325	0.102727	0.116451	1775	2	0	4	4	1	0	0	0	0	0	0	1	0	2	0	0	0	2
MT2_Mm:LOC102638435	LOC102638435									chr1	85178898	85180471	MT2_Mm	ERVL	LTR	NA	NA	NA	+	promoter_tss	0	5.31183	3.36796	2.18857	0	6.2474	20.0955	0.00119921	0.00260062	1777	0	0	0	0	0	3	2	4	1	0	1	0	1	0	0	0	0	0
MTA_Mm:Ccnb1ip1	Ccnb1ip1									chr14	50794776	50795635	MTA_Mm	ERVL-MaLR	LTR	NA	NA	NA	-	internal	0	5.31184	2.52337	2.18863	4.75633	6.46399	18.7691	0.00212208	0.00424623	1778	0	0	0	0	0	3	2	4	0	1	0	0	1	0	7	2	0	0
MT2_Mm:LOC108168952	LOC108168952									chr4	42744436	42760975	MT2_Mm	ERVL	LTR	NA	NA	NA	+	promoter_tss	0	5.31184	5.2067	3.63935	5.02597	6.80608	18.2152	0.00268842	0.00520626	1779	0	0	0	0	0	3	2	4	2	1	5	2	1	0	10	1	0	0
L3:Phtf2	Phtf2							X	X	chr5	20803316	20805654	NA	NA	NA	L3	CR1	LINE	-	internal	0	5.31175	5.09214	4.87584	2.12162	6.70042	23.051	0.000330077	0.000855522	1780	0	0	0	0	0	3	2	4	4	0	3	3	1	4	0	0	1	2
B2_Mm2:Kctd13	Kctd13									chr7	126947113	126947560	NA	NA	NA	B2_Mm2	B2	SINE	+	terminator	0	5.29449	2.5712	2.90911	0	6.23176	16.7637	0.00497036	0.0086801	1781	0	0	0	0	0	2	3	4	1	0	0	0	0	2	0	0	0	0
ORR1A1:Kif18a	Kif18a									chr2	109312451	109333255	ORR1A1	ERVL-MaLR	LTR	NA	NA	NA	+	promoter_tss	0	5.29742	3.41727	2.98232	0	6.28192	22.3605	0.000447098	0.00110961	1782	0	0	0	0	0	2	3	4	1	1	0	0	1	1	0	0	0	0
MTC:Mettl6	Mettl6									chr14	31465479	31470362	NA	NA	NA	MTC	ERVL-MaLR	LTR	-	promoter_tss	2.30621	-1.68698	-1.68698	-1.68698	0.302565	5.95526	7.13763	0.210604	0.224667	1783	1	0	7	2	0	0	0	0	0	0	0	0	0	0	1	0	0	0
RLTR40:Hsbp1l1	Hsbp1l1									chr18	80235515	80250016	NA	NA	NA	RLTR40	ERVK	LTR	-	promoter_tss	0	3.8235	5.90317	3.08973	4.7713	6.72282	16.0105	0.00681414	0.0113292	1784	0	0	0	0	0	1	1	1	1	1	12	1	1	0	0	9	0	0
MTC:Pik3cd	Pik3cd							X	X	chr4	149674194	149701502	NA	NA	NA	MTC	ERVL-MaLR	LTR	-	promoter_tss	2.32129	-1.68614	-1.68614	-1.68614	-1.68614	5.92032	7.40264	0.192376	0.206513	1785	1	0	8	0	1	0	0	0	0	0	0	0	0	0	0	0	0	2
RMER3D-int:Tpd52l1	Tpd52l1							X	X	chr10	31379330	31433388	NA	NA	NA	RMER3D-int	ERVK	LTR	-	promoter_tss	2.32383	-1.69997	-1.69997	-1.69997	-1.69997	5.92278	6.09873	0.29673	0.309756	1786	0	1	9	0	0	0	0	0	0	0	0	0	0	0	0	0	0	2
L1MB4:Nol4l	Nol4l		X						X	chr2	153463764	153470687	L1MB4	L1	LINE	NA	NA	NA	-	terminator	0	3.2235	5.30254	4.94792	5.12069	6.75769	14.9877	0.010415	0.0163208	1787	0	0	0	0	0	0	1	1	5	0	3	1	2	6	0	1	8	2
RLTR34D_MM:H2-T22	H2-T22									chr17	36042460	36042569	NA	NA	NA	RLTR34D_MM	ERVK	LTR	-	promoter_tss	0	3.20611	5.13204	0	0	6.14241	11.2923	0.0458824	0.0580628	1788	0	0	0	0	0	0	1	1	0	7	0	0	0	0	0	0	0	0
RLTR45-int:Cd84	Cd84									chr1	171886426	171888597	NA	NA	NA	RLTR45-int	ERVK	LTR	+	terminator	0	0	0	0	5.26488	6.15035	9.30569	0.0974752	0.111175	1789	0	0	0	0	0	0	0	0	0	0	0	0	0	0	0	13	0	0
MLT2B3:Ptgr2	Ptgr2									chr12	84295335	84296227	NA	NA	NA	MLT2B3	ERVL	LTR	+	internal	0	0	0	0	5.26439	6.15035	8.67776	0.122629	0.136811	1790	0	0	0	0	0	0	0	0	0	0	0	0	0	0	0	13	0	0
B3:C330021F23Rik	C330021F23Rik									chr8	3580474	3583834	B3	B2	SINE	NA	NA	NA	+	internal	0	0	0	0	5.26451	6.15035	8.82886	0.116088	0.129869	1791	0	0	0	0	0	0	0	0	0	0	0	0	0	0	0	13	0	0
ID_B1:Chtop	Chtop									chr3	90500514	90502115	ID_B1	B4	SINE	NA	NA	NA	-	internal/terminator	0	0	5.73433	4.49498	2.01062	6.48231	24.2084	0.000197981	0.000545649	1793	0	0	0	0	0	0	0	0	2	1	9	2	2	2	1	0	0	0
RLTR17B_Mm:Trpv2	Trpv2								X	chr11	62594219	62594922	RLTR17B_Mm	ERVK	LTR	NA	NA	NA	+	internal	-0.333759	2.12139	4.04314	1.37225	-1.69621	6.47502	18.7798	0.00211237	0.00423509	1794	0	1	0	0	1	1	1	1	2	1	9	1	1	0	0	0	0	1
PB1D11:Flt3l	Flt3l									chr7	45136084	45136807	NA	NA	NA	PB1D11	Alu	SINE	-	promoter_tss	0	3.8242	5.34581	4.66997	0	6.48276	16.7073	0.00508972	0.00882823	1795	0	0	0	0	0	1	1	1	6	0	2	0	6	1	0	0	0	0
MT2_Mm:Zfp51	Zfp51									chr17	21442787	21461660	MT2_Mm	ERVL	LTR	NA	NA	NA	+	promoter_tss	0	0	5.3489	2.957	0	6.1853	15.9549	0.00697394	0.0115667	1796	0	0	0	0	0	0	0	0	6	0	2	0	1	1	0	0	0	0
MT2_Mm:Farp1	Farp1								X	chr14	121223391	121230628	MT2_Mm	ERVL	LTR	NA	NA	NA	+	promoter	0	5.16961	4.62787	4.44151	2.02708	6.53048	20.4982	0.00100732	0.00224153	1798	0	0	0	0	0	3	2	3	3	0	2	1	2	3	0	1	0	1
ORR1A1:Zfp775	Zfp775									chr6	48605638	48613177	ORR1A1	ERVL-MaLR	LTR	NA	NA	NA	+	promoter_tss	0	5.15401	3.41984	5.09761	2.02661	6.52381	21.658	0.000608058	0.00145948	1799	0	0	0	0	0	2	3	3	1	1	0	1	2	7	0	1	0	0
B1_Mus2:Nlrc4	Nlrc4								X	chr17	74451403	74453052	B1_Mus2	Alu	SINE	NA	NA	NA	-	terminator	0	4.17008	3.91589	5.02082	2.89811	6.42822	19.0669	0.00186777	0.00382724	1800	0	0	0	0	0	1	1	2	1	1	1	2	3	4	0	1	1	1
B1_Mus2:Gm7972	Gm7972									chr9	75470366	75472176	B1_Mus2	Alu	SINE	NA	NA	NA	+	internal/promoter_tss	0	0	5.7994	3.09646	0	6.35395	20.052	0.00122197	0.00263878	1801	0	0	0	0	0	0	0	0	1	1	11	1	1	0	0	0	0	0
MT2_Mm:Ube2j2	Ube2j2									chr4	155927657	155949006	MT2_Mm	ERVL	LTR	NA	NA	NA	+	promoter_tss	0	2.31806	5.8047	4.01956	2.16082	6.49255	17.9225	0.00304515	0.00577071	1802	0	0	0	0	0	0	0	1	1	1	11	2	2	0	0	0	1	0
ORR1A2:Ptdss1	Ptdss1			X						chr13	66938701	66945276	ORR1A2	ERVL-MaLR	LTR	NA	NA	NA	+	promoter_tss	0	3.82536	5.04819	4.66908	4.73269	6.64771	11.224	0.0471152	0.0594316	1803	0	0	0	0	0	1	1	1	3	0	4	0	6	1	9	0	0	1
ORR1D2:Cep70	Cep70								X	chr9	99302664	99310150	ORR1D2	ERVL-MaLR	LTR	B1_Mus2	Alu	SINE	+	internal/terminator/promoter_tss	0	3.81659	5.53322	4.89475	3.33371	6.64196	21.5357	0.000641425	0.00152729	1804	0	0	0	0	0	1	1	1	3	1	6	3	2	3	0	3	0	1
MIRc:Mbtd1	Mbtd1							X	X	chr11	93887073	93891338	NA	NA	NA	MIRc	MIR	SINE	+	internal	2.0487	0.848577	-1.6866	-1.6866	-1.6866	5.9369	6.1652	0.290474	0.304002	1805	1	0	0	1	7	1	0	0	0	0	0	0	0	0	0	0	0	2
AmnSINE1:Dpy19l3	Dpy19l3									chr7	35695414	35703488	NA	NA	NA	AmnSINE1	Deu	SINE	-	internal	3.74077	0	0	0	0	5.85741	7.66878	0.175459	0.189348	1806	0	0	0	6	2	0	0	0	0	0	0	0	0	0	0	0	0	0
MTD:Bank1	Bank1									chr3	136214026	136231473	NA	NA	NA	MTD	ERVL-MaLR	LTR	-	promoter_tss	3.74911	0	0	0	0	5.85853	7.39948	0.192585	0.206629	1807	0	0	1	0	7	0	0	0	0	0	0	0	0	0	0	0	0	0
ID_B1:Rhoh	Rhoh									chr5	65863150	65891552	ID_B1	B4	SINE	NA	NA	NA	+	internal	3.75313	0	2.43788	4.20932	2.15321	6.15528	8.30005	0.140456	0.154095	1808	0	0	1	0	7	0	0	0	0	0	1	1	2	2	0	0	1	0
L3:Pdlim2	Pdlim2								X	chr14	70171298	70171459	NA	NA	NA	L3	CR1	LINE	-	internal	1.3064	1.3676	-2.45029	-2.45029	-2.45029	6.0527	10.2875	0.0674867	0.0800524	1809	1	1	1	1	6	1	1	1	0	0	0	0	0	0	0	0	0	1
MTA_Mm:Mrap	Mrap									chr16	90745475	90747523	MTA_Mm	ERVL-MaLR	LTR	NA	NA	NA	+	promoter_tss	3.75462	0	2.52531	3.08152	0	6.00696	8.94851	0.111136	0.124875	1810	0	0	1	1	6	0	0	0	0	1	0	1	1	0	0	0	0	0
L2c:Smox	Smox							X		chr2	131524333	131524742	L2c	L2	LINE	NA	NA	NA	+	internal	3.76075	4.16156	0	0	0	6.05279	11.9145	0.0359777	0.0471329	1811	0	0	1	7	0	1	1	2	0	0	0	0	0	0	0	0	0	1
RLTR19-int:Ip6k1	Ip6k1							X		chr9	108032209	108033619	NA	NA	NA	RLTR19-int	ERVK	LTR	+	terminator	0	5.27047	4.83166	4.8146	2.10675	6.63562	25.0284	0.000137584	0.000397962	1812	0	0	0	0	0	2	2	5	1	2	3	1	2	5	0	0	1	1
ERVB4_1C-LTR_Mm:LOC102637912	LOC102637912									chr17	53775824	53776444	NA	NA	NA	ERVB4_1C-LTR_Mm	ERVK	LTR	+	terminator	0	3.26724	5.61566	2.18923	0	6.32711	19.9615	0.00127069	0.00271533	1813	0	0	0	0	0	1	0	1	2	1	8	0	1	0	0	0	0	0
MLT2B3:Ptgr2	Ptgr2									chr12	84296356	84298010	MLT2B3	ERVL	LTR	NA	NA	NA	+	internal	0	0	0	0	5.15243	6.11718	8.49276	0.131089	0.144516	1814	0	0	0	0	0	0	0	0	0	0	0	0	0	0	0	12	0	0
MTD:Zfp111	Zfp111									chr7	24207115	24210510	NA	NA	NA	MTD	ERVL-MaLR	LTR	-	internal/promoter_tss	3.81481	0	0	0	0	5.86734	7.96532	0.158158	0.171947	1815	0	0	5	0	3	0	0	0	0	0	0	0	0	0	0	0	0	0
MTD:Dram1	Dram1									chr10	88344711	88359378	NA	NA	NA	MTD	ERVL-MaLR	LTR	-	internal	0	0	5.20312	0	0	6.06561	13.2563	0.021092	0.0297881	1816	0	0	0	0	0	0	0	0	6	0	1	0	0	0	0	0	0	0
MTD:Dram1	Dram1									chr10	88359516	88364311	MTD	ERVL-MaLR	LTR	MT2A	ERVL	LTR	-	internal/promoter_tss	0	0	5.20312	0	0	6.06561	13.2563	0.021092	0.0297881	1817	0	0	0	0	0	0	0	0	6	0	1	0	0	0	0	0	0	0
ORR1D-int:LOC108168101	LOC108168101									chr13	74611387	74612723	NA	NA	NA	ORR1D-int	ERVL-MaLR	LTR	-	internal/promoter_tss	0	2.45708	5.19876	0	3.96573	6.27859	12.0633	0.0339301	0.044737	1818	0	0	0	0	0	0	1	0	6	0	1	0	0	0	0	5	0	0
MT2C_Mm:Srpk2	Srpk2							X	X	chr5	23540503	23541108	NA	NA	NA	MT2C_Mm	ERVL	LTR	-	promoter_tss	0	0	5.20353	0	0	6.06561	13.0048	0.0233335	0.032527	1819	0	0	0	0	0	0	0	0	6	0	1	0	0	0	0	0	0	2
RMER21B:Ctu1	Ctu1									chr7	43675646	43676426	NA	NA	NA	RMER21B	ERV1	LTR	+	internal/terminator	0	0	5.20301	0	0	6.06561	13.3242	0.0205231	0.0292066	1820	0	0	0	0	0	0	0	0	6	0	1	0	0	0	0	0	0	0
L1M3:Nemf	Nemf									chr12	69348937	69350856	NA	NA	NA	L1M3	L1	LINE	-	internal	0	3.82542	5.1941	0	0	6.20523	16.4385	0.00569745	0.00971751	1821	0	0	0	0	0	1	1	1	6	0	1	0	0	0	0	0	0	0
B1_Mus2:Grk4	Grk4							X	X	chr5	34661004	34661464	NA	NA	NA	B1_Mus2	Alu	SINE	+	terminator	0	0	5.20435	0	0	6.06561	12.4893	0.0286646	0.0387181	1822	0	0	0	0	0	0	0	0	6	0	1	0	0	0	0	0	0	2
PB1D10:Sphk2	Sphk2									chr7	45717063	45717700	PB1D10	Alu	SINE	NA	NA	NA	-	internal	0	5.01945	0	4.62534	2.01459	6.3218	16.7174	0.00506809	0.00879816	1823	0	0	0	0	0	3	2	2	0	0	0	5	0	1	0	1	0	0
MTE2a:Prkci	Prkci									chr3	31032427	31033177	MTE2a	ERVL-MaLR	LTR	NA	NA	NA	+	promoter_tss	1.3755	-2.4503	-0.010066	-0.261321	-0.300967	6.05042	3.97109	0.553586	0.560437	1824	1	1	6	2	0	0	0	0	0	0	1	0	1	0	0	0	1	0
ORR1F:Tex26	Tex26								X	chr5	149458913	149463116	ORR1F	ERVL-MaLR	LTR	NA	NA	NA	+	internal/promoter	0.892085	-2.954	-2.954	-2.954	-2.954	5.94091	7.75345	0.170357	0.184426	1825	0	3	7	1	0	0	0	0	0	0	0	0	0	0	0	0	0	1
B3A:Mex3c	Mex3c									chr18	73573776	73576685	NA	NA	NA	B3A	B2	SINE	+	terminator	2.14698	1.6575	2.64917	1.86433	2.00747	6.42359	2.42054	0.788411	0.790731	1826	1	0	7	1	0	1	1	0	2	1	1	1	1	1	0	4	0	0
MTEb:Bbs9	Bbs9							X		chr9	22679064	22681904	NA	NA	NA	MTEb	ERVL-MaLR	LTR	+	terminator	3.86466	0	0	2.18948	0	5.91891	5.63594	0.343269	0.355076	1827	0	0	8	0	0	0	0	0	0	0	0	0	1	0	0	0	0	1
MT2B2:Fbxo15	Fbxo15			X	X					chr18	84935180	84977366	MT2B2	ERVL	LTR	NA	NA	NA	+	internal/promoter_tss	0	0	5.69706	3.08709	2.00205	6.34508	19.8216	0.00134984	0.00285757	1828	0	0	0	0	0	0	0	0	1	1	10	1	1	0	1	0	0	2
HAL1M8:Grik4	Grik4									chr9	42740111	42742052	NA	NA	NA	HAL1M8	L1	LINE	-	promoter_tss	0	3.81565	5.28274	4.96455	2.90113	6.57875	21.7441	0.00058562	0.00141392	1829	0	0	0	0	0	1	1	1	4	1	3	1	2	6	0	1	1	0
ORR1C1:Zfp644	Zfp644				X		X			chr5	106660969	106666784	ORR1C1	ERVL-MaLR	LTR	NA	NA	NA	-	internal	-1.08209	0.209573	-3.61449	-3.61449	-3.61449	6.00919	7.66396	0.175754	0.189566	1830	0	5	1	2	0	1	1	1	0	0	0	0	0	0	0	0	0	2
RMER21B:Gabra3	Gabra3							X		chrX	72540184	72540743	NA	NA	NA	RMER21B	ERV1	LTR	-	promoter_tss	-2.23561	0.221563	-3.59892	-3.59892	-3.59892	5.961	9.46693	0.0918277	0.105558	1831	4	1	0	1	0	1	1	1	0	0	0	0	0	0	0	0	0	1
ORR1B2:Zfp946	Zfp946							X	X	chr17	22446664	22446796	ORR1B2	ERVL-MaLR	LTR	ORR1B2	ERVL-MaLR	LTR	+	internal/promoter_tss	0	5.35773	3.33596	3.02248	0	6.29715	17.7958	0.00321353	0.00602352	1832	0	0	0	0	0	2	1	7	0	1	1	0	2	0	0	0	0	2
MIRb:Rbm39	Rbm39				X					chr2	156173022	156176402	NA	NA	NA	MIRb	MIR	SINE	-	internal	0	5.11659	0	0	0	6.06302	19.3594	0.00164723	0.00342684	1833	0	0	0	0	0	2	2	4	0	0	0	0	0	0	0	0	0	1
MT2B:Zfp54	Zfp54								X	chr17	21421899	21427736	MT2B	ERVL	LTR	NA	NA	NA	+	promoter_tss	0	5.11844	2.52442	2.97211	0	6.18783	17.4531	0.00371604	0.00671316	1834	0	0	0	0	0	2	2	4	0	1	0	0	1	1	0	0	0	1
MIRb:Cpt1c	Cpt1c									chr7	44961038	44961518	MIRb	MIR	SINE	NA	NA	NA	-	internal/terminator	0	4.57324	5.02389	2.09556	0	6.29113	13.7446	0.0173161	0.0251681	1836	0	0	0	0	0	2	2	1	6	0	0	0	0	1	0	0	0	0
MTC:Slc39a9	Slc39a9									chr12	80673294	80675258	NA	NA	NA	MTC	ERVL-MaLR	LTR	+	terminator	2.04348	4.8215	4.74939	2.11609	0	6.3227	12.9574	0.0237817	0.0330712	1837	0	0	0	1	1	2	3	1	5	0	0	0	0	1	0	0	0	0
ORR1A2-int:Dirc2	Dirc2									chr16	35750589	35762078	NA	NA	NA	ORR1A2-int	ERVL-MaLR	LTR	-	promoter_tss	0	0	0	0	5.03116	6.08322	8.40092	0.13548	0.148956	1838	0	0	0	0	0	0	0	0	0	0	0	0	0	0	0	11	0	0
PB1D11:Wars2	Wars2				X					chr3	99205450	99206711	PB1D11	Alu	SINE	B1F1	Alu	SINE	+	internal	0	0	0	0	5.03189	6.08322	9.12477	0.10419	0.117782	1839	0	0	0	0	0	0	0	0	0	0	0	0	0	0	0	11	0	1
ID_B1:Plcd4	Plcd4							X		chr1	74559469	74560289	ID_B1	B4	SINE	NA	NA	NA	+	promoter_tss	0	2.33425	5.06584	4.80254	2.9142	6.42843	16.9834	0.00453143	0.00800931	1841	0	0	0	0	0	0	0	1	0	5	2	1	2	5	0	1	1	1
L2:Nup188	Nup188									chr2	30298489	30300799	NA	NA	NA	L2	L2	LINE	+	internal	0	0	3.45123	5.29944	4.56935	6.46716	13.8001	0.0169303	0.0246247	1842	0	0	0	0	0	0	0	0	1	1	0	1	1	10	8	0	0	0
MTB_Mm:Fndc3a	Fndc3a							X	X	chr14	72599142	72626716	NA	NA	NA	MTB_Mm	ERVL-MaLR	LTR	-	promoter_tss	3.55793	0	0	0	0	5.83193	7.5249	0.184436	0.198616	1843	0	0	0	1	6	0	0	0	0	0	0	0	0	0	0	0	0	2
RLTR10-int:Xdh	Xdh									chr17	73886519	73887885	NA	NA	NA	RLTR10-int	ERVK	LTR	-	internal	3.56601	4.51285	0	0	0	6.08169	13.4545	0.0194719	0.0278851	1844	0	0	0	3	4	2	1	2	0	0	0	0	0	0	0	0	0	0
Lx8b:LOC101055907	LOC101055907									chrX	169361099	169368114	Lx8b	L1	LINE	L1_Mur2	L1	LINE	+	internal/terminator	3.56983	0	4.55702	3.07998	0	6.1683	11.8923	0.0362942	0.0475171	1845	0	0	0	5	2	0	0	0	1	1	3	1	1	0	0	0	0	0
L3:Ccnk	Ccnk									chr12	108182208	108186375	L3	CR1	LINE	NA	NA	NA	+	internal	3.56752	3.38749	0	0	4.18102	6.15175	7.40361	0.192312	0.206513	1846	0	0	0	7	0	1	1	0	0	0	0	0	0	0	5	1	0	0
B1_Mur2:D11Wsu47e	D11Wsu47e									chr11	113685271	113687773	B1_Mur2	Alu	SINE	NA	NA	NA	+	promoter	0	0	5.0389	4.85184	2.02618	6.36234	23.1128	0.000321203	0.000834638	1847	0	0	0	0	0	0	0	0	2	1	4	2	2	4	0	1	0	0
MTA_Mm:Stam	Stam									chr2	14099505	14102400	MTA_Mm	ERVL-MaLR	LTR	NA	NA	NA	+	promoter_tss	0.637009	-2.94187	0.39687	-0.753021	-2.94187	6.04584	6.0728	0.2992	0.311698	1848	2	1	1	0	6	0	0	0	0	1	1	0	1	0	0	0	0	0
L1M5:Atf2	Atf2							X	X	chr2	73870685	73873669	L1M5	L1	LINE	X6A_LINE	CR1	LINE	-	internal	2.04283	4.95729	0	0	0	6.06506	14.9011	0.0107936	0.0168624	1849	0	0	0	1	1	2	2	3	0	0	0	0	0	0	0	0	0	2
PB1D10:Arnt	Arnt									chr3	95451734	95452584	PB1D10	Alu	SINE	NA	NA	NA	+	internal/promoter_tss	0	4.95721	2.5779	0	0	6.07665	15.7406	0.00762493	0.0125547	1850	0	0	0	0	0	2	2	3	1	0	0	0	0	0	0	0	0	0
B2_Mm2:Orai1	Orai1							X	X	chr5	123028022	123029074	B2_Mm2	B2	SINE	NA	NA	NA	+	promoter_tss	0	4.95708	0	0	0	6.0214	15.4785	0.00850183	0.0137767	1851	0	0	0	0	0	2	2	3	0	0	0	0	0	0	0	0	0	2
MT2B:0610040J01Rik	0610040J01Rik								X	chr5	63888186	63896429	MT2B	ERVL	LTR	NA	NA	NA	+	internal/promoter_tss	1.40193	4.95726	0	0	0	6.04537	15.3125	0.00910723	0.0145844	1852	0	0	1	0	0	2	2	3	0	0	0	0	0	0	0	0	0	1
B3A:Ccdc30	Ccdc30							X		chr4	119352652	119353069	B3A	B2	SINE	NA	NA	NA	-	terminator	1.36113	4.95725	0	0	0	6.04352	15.1978	0.00954972	0.0151742	1853	0	0	0	1	0	2	2	3	0	0	0	0	0	0	0	0	0	1
X6A_LINE:Atf2	Atf2							X	X	chr2	73850982	73873669	NA	NA	NA	X6A_LINE	CR1	LINE	-	internal	0	4.95726	0	0	0	6.0214	17.8968	0.00307853	0.0058131	1854	0	0	0	0	0	2	2	3	0	0	0	0	0	0	0	0	0	2
B1_Mur2:4930444P10Rik	4930444P10Rik									chr1	16078700	16081667	NA	NA	NA	B1_Mur2	Alu	SINE	-	internal	0	4.95733	2.56882	0	0	6.07665	17.1615	0.00420345	0.00748786	1855	0	0	0	0	0	2	2	3	1	0	0	0	0	0	0	0	0	0
RLTR25A:Kntc1	Kntc1									chr5	123762606	123763794	RLTR25A	ERVK	LTR	NA	NA	NA	+	internal/promoter	2.03778	4.95717	0	0	0	6.0649	13.6255	0.0181714	0.026299	1856	0	0	0	0	2	2	2	3	0	0	0	0	0	0	0	0	0	0
MTD:Npsr1	Npsr1								X	chr9	24134866	24140028	NA	NA	NA	MTD	ERVL-MaLR	LTR	+	terminator	0	4.95711	0	0	0	6.0214	15.8649	0.00724046	0.0119699	1857	0	0	0	0	0	2	2	3	0	0	0	0	0	0	0	0	0	1
ID2:Nmnat1	Nmnat1							X		chr4	149474595	149475533	NA	NA	NA	ID2	ID	SINE	-	promoter_tss	0	4.95727	0	2.18943	0	6.06352	16.208	0.00627452	0.0105608	1858	0	0	0	0	0	2	2	3	0	0	0	0	1	0	0	0	0	1
MER34-int:Spam1	Spam1								X	chr6	24790364	24791372	NA	NA	NA	MER34-int	ERV1	LTR	+	internal	2.04696	4.95779	3.41816	4.18636	0	6.34292	15.3167	0.00909151	0.0145706	1859	0	0	0	0	2	2	2	3	1	1	0	1	1	3	0	0	0	1
L2b:Cdk13	Cdk13								X	chr13	17772957	17801305	NA	NA	NA	L2b	L2	LINE	-	internal/promoter_tss	0	4.42661	2.58721	4.74239	4.81417	6.51783	10.7728	0.0560756	0.0689979	1860	0	0	0	0	0	1	1	3	1	0	0	1	0	7	0	0	7	1
AmnSINE1:Naaladl2	Naaladl2							X	X	chr3	24058263	24070612	NA	NA	NA	AmnSINE1	Deu	SINE	-	promoter_tss	1.19517	-2.4503	-2.4503	-0.260781	-2.4503	5.9349	6.64768	0.248189	0.261757	1861	1	1	5	2	0	0	0	0	0	0	0	0	1	0	0	0	0	2
Lx8:Cdkl3	Cdkl3									chr11	52040620	52089588	Lx8	L1	LINE	NA	NA	NA	+	internal	0	0	5.35763	3.90302	2.7992	6.33059	18.8567	0.00204394	0.00411134	1862	0	0	0	0	0	0	0	0	2	1	6	1	1	2	2	0	0	0
L2c:Smox	Smox							X		chr2	131522219	131524243	NA	NA	NA	L2c	L2	LINE	+	internal	3.65994	4.16165	0	0	0	6.04042	11.6887	0.0393108	0.0508158	1863	0	0	6	1	0	1	1	2	0	0	0	0	0	0	0	0	0	1
IAPEz-int:BC117090	BC117090									chr16	36323022	36329967	NA	NA	NA	IAPEz-int	ERVK	LTR	-	promoter_tss	0	0	3.22601	0	4.89802	6.13368	11.5193	0.0420018	0.0537429	1864	0	0	0	0	0	0	0	0	0	0	2	0	0	0	2	8	0	0
B1_Mur2:Aknad1	Aknad1							X	X	chr3	108765237	108765676	NA	NA	NA	B1_Mur2	Alu	SINE	+	terminator	3.68669	0	0	0	0	5.84742	5.46829	0.361435	0.37236	1865	0	0	7	0	0	0	0	0	0	0	0	0	0	0	0	0	0	2
RMER6C:Glra3	Glra3									chr8	56122232	56125073	RMER6C	ERVK	LTR	NA	NA	NA	+	promoter_tss	3.67145	3.22669	3.337	4.65372	2.15272	6.33932	6.52389	0.258523	0.271955	1866	0	0	7	0	0	0	1	1	0	1	1	1	3	3	0	0	1	0
B3A:Ccnyl1	Ccnyl1							X		chr1	64721789	64722434	NA	NA	NA	B3A	B2	SINE	+	terminator	0.811605	2.8652	0.864747	-1.69703	3.05619	6.35987	9.42319	0.0933294	0.106983	1867	0	1	0	3	0	2	2	1	1	0	0	0	0	0	7	2	0	1
L2b:Zfp740	Zfp740			X						chr15	102205086	102205228	L2b	L2	LINE	L2c	L2	LINE	+	internal/promoter_tss	0	0	5.45085	3.09173	0	6.23758	19.1123	0.00183171	0.00375711	1868	0	0	0	0	0	0	0	0	1	1	8	1	1	0	0	0	0	1
ID_B1:Aurkc	Aurkc									chr7	6990604	6996267	NA	NA	NA	ID_B1	B4	SINE	+	internal	0	0	5.44965	3.09379	0	6.23758	18.5069	0.00237387	0.00464552	1869	0	0	0	0	0	0	0	0	1	1	8	1	1	0	0	0	0	0
B4A:Mettl9	Mettl9						X	X	X	chr7	121057399	121059080	NA	NA	NA	B4A	B4	SINE	+	terminator	2.58756	0	5.44819	3.09639	0	6.29794	13.552	0.0187202	0.0269218	1870	0	0	3	0	0	0	0	0	1	1	8	1	1	0	0	0	0	3
MLT1O:Srr	Srr									chr11	74913133	74919436	NA	NA	NA	MLT1O	ERVL-MaLR	LTR	-	internal/promoter_tss	0	2.43553	3.4231	5.20338	4.27559	6.43482	17.9311	0.00303404	0.00575567	1872	0	0	0	0	0	0	1	0	1	1	0	1	1	9	3	2	1	0
MT2_Mm:Chit1	Chit1						X	X		chr1	134129866	134138640	MT2_Mm	ERVL	LTR	NA	NA	NA	+	promoter_tss	0	3.82414	4.96443	0	0	6.15355	16.4348	0.00570631	0.00972451	1873	0	0	0	0	0	1	1	1	5	0	1	0	0	0	0	0	0	2
MT2_Mm:Npsr1	Npsr1								X	chr9	24121874	24134733	MT2_Mm	ERVL	LTR	NA	NA	NA	+	promoter_tss	0	4.22425	4.95871	4.37248	2.01688	6.42663	14.3012	0.0138055	0.0207742	1874	0	0	0	0	0	1	2	1	5	0	1	0	2	4	0	1	0	1
MLTR31A_MM:Mrpl42	Mrpl42				X					chr10	95500522	95503953	NA	NA	NA	MLTR31A_MM	ERVK	LTR	-	promoter_tss	0	0	4.73564	0	4.77045	6.26473	13.67	0.0178469	0.0258477	1875	0	0	0	0	0	0	0	0	1	0	5	0	0	0	0	1	6	1
MTEa:Fbxo16	Fbxo16									chr14	65295557	65296877	NA	NA	NA	MTEa	ERVL-MaLR	LTR	+	internal	0	2.46695	0	0	4.90146	6.09678	9.11011	0.104752	0.118287	1877	0	0	0	0	0	0	1	0	0	0	0	0	0	0	0	10	0	0
PB1D9:Gm40353	Gm40353									chr5	150694503	150694621	NA	NA	NA	PB1D9	Alu	SINE	+	internal	0	4.44345	5.21072	3.90549	4.66419	6.64008	18.389	0.00249639	0.00487129	1878	0	0	0	0	0	1	1	3	2	1	5	1	1	2	2	0	5	0
MTC:Usp28	Usp28							X	X	chr9	49006770	49008428	MTC	ERVL-MaLR	LTR	NA	NA	NA	+	promoter_tss	1.36413	4.1694	3.34824	4.66095	2.02994	6.2938	13.016	0.0232297	0.0324264	1879	0	0	0	0	1	1	1	2	0	1	1	1	3	3	0	1	0	2
B4A:Ap4s1	Ap4s1									chr12	51705245	51716941	B4A	B4	SINE	NA	NA	NA	+	internal	0	4.77823	0	0	0	5.9786	14.8613	0.0109717	0.0171146	1880	0	0	0	0	0	2	2	2	0	0	0	0	0	0	0	0	0	0
MLT2F:Noxred1	Noxred1									chr12	87233579	87237307	NA	NA	NA	MLT2F	ERVL	LTR	-	internal	0	4.77656	2.57338	0	0	6.03527	15.1288	0.00982597	0.0155527	1881	0	0	0	0	0	2	2	2	1	0	0	0	0	0	0	0	0	0
L1M4b:Arl5a	Arl5a									chr2	52416696	52424589	NA	NA	NA	L1M4b	L1	LINE	-	promoter_tss	1.39171	4.77121	2.45708	2.24132	3.69296	6.22746	11.2434	0.0467627	0.0590671	1882	0	0	1	0	0	2	2	2	0	0	1	1	0	0	2	2	0	0
B1F2:C87436	C87436								X	chr6	86456891	86457815	B1F2	Alu	SINE	NA	NA	NA	+	internal	0	4.77427	2.56023	0	2.00894	6.07043	14.7841	0.0113257	0.0175729	1883	0	0	0	0	0	2	2	2	1	0	0	0	0	0	1	0	0	1
L2:Trpm7	Trpm7								X	chr2	126800337	126801122	L2	L2	LINE	NA	NA	NA	-	internal/terminator	0	4.77604	2.57009	0	0	6.03527	15.5689	0.00818894	0.0133499	1884	0	0	0	0	0	2	2	2	1	0	0	0	0	0	0	0	0	1
B3:Paox	Paox									chr7	140130297	140131646	B3	B2	SINE	NA	NA	NA	+	internal	-1.91792	1.46074	-3.31188	-1.06299	-3.31188	6.13321	11.7905	0.0377746	0.0491094	1885	2	2	1	0	0	2	2	2	0	0	0	1	0	0	0	0	0	0
ORR1A2:Xpa	Xpa									chr4	46185696	46185915	NA	NA	NA	ORR1A2	ERVL-MaLR	LTR	-	promoter_tss	0	4.77651	0	0	0	5.9786	16.5184	0.00550984	0.00944477	1886	0	0	0	0	0	2	2	2	0	0	0	0	0	0	0	0	0	0
LTR16C:Slc24a3	Slc24a3							X	X	chr2	145518947	145522509	NA	NA	NA	LTR16C	ERVL	LTR	+	terminator	-2.93598	1.84057	-2.93598	-0.74653	-2.93598	6.08455	12.4286	0.0293644	0.0394549	1887	3	0	0	0	0	2	2	2	0	0	0	0	1	0	0	0	0	2
RLTR9A:Sva	Sva						X			chr6	42032523	42040076	RLTR9A	ERVK	LTR	NA	NA	NA	+	internal	0	4.76947	3.91633	4.64068	2.02978	6.40467	19.3157	0.00167847	0.00347065	1888	0	0	0	0	0	2	2	2	1	1	1	1	2	4	0	1	0	1
ID_B1:Zfp644	Zfp644				X		X			chr5	106690877	106695642	ID_B1	B4	SINE	NA	NA	NA	-	internal	2.04726	0	5.31782	3.08165	0	6.23529	16.5304	0.00548205	0.00942876	1889	0	0	0	2	0	0	0	0	1	1	7	1	1	0	0	0	0	2
B1_Mur1:Deaf1	Deaf1				X					chr7	141297616	141307486	NA	NA	NA	B1_Mur1	Alu	SINE	-	internal	0	0	5.31399	3.08747	2.00171	6.22818	16.779	0.00493857	0.00863194	1890	0	0	0	0	0	0	0	0	1	1	7	1	1	0	1	0	0	1
PB1D10:Rbm25	Rbm25									chr12	83635481	83642628	PB1D10	Alu	SINE	NA	NA	NA	+	internal	0	0	5.3176	3.08197	2.80515	6.25958	17.552	0.00356359	0.00651256	1891	0	0	0	0	0	0	0	0	1	1	7	1	1	0	1	1	0	0
B3A:Emd	Emd									chrX	74255876	74260781	NA	NA	NA	B3A	B2	SINE	+	terminator	-0.28982	-1.68825	3.62925	1.39388	1.97677	6.35417	11.3757	0.0444192	0.0563856	1892	1	0	1	0	0	0	0	0	1	1	7	1	1	0	4	0	0	0
ORR1A2:Gm28729	Gm28729									chr9	96497006	96498591	NA	NA	NA	ORR1A2	ERVL-MaLR	LTR	-	promoter_tss	0	0	5.31605	3.08428	2.0045	6.22818	17.5628	0.00354735	0.00650292	1893	0	0	0	0	0	0	0	0	1	1	7	1	1	0	1	0	0	0
MLT1J:Atg10	Atg10			X						chr13	91040988	91099614	NA	NA	NA	MLT1J	ERVL-MaLR	LTR	-	promoter_tss	-0.104774	-3.32243	-3.32243	-3.32243	-3.32243	5.88773	6.0348	0.302847	0.315337	1894	0	4	4	1	0	0	0	0	0	0	0	0	0	0	0	0	0	1
B4A:Zcrb1	Zcrb1									chr15	93393764	93395586	B4A	B4	SINE	NA	NA	NA	-	internal	-1.06164	2.47439	2.07336	0.609153	0.442484	6.42975	9.69838	0.0842469	0.0976118	1895	1	1	1	0	0	2	1	4	0	1	4	1	1	0	1	0	1	0
MTE2a:Pid1	Pid1								X	chr1	84159378	84364029	NA	NA	NA	MTE2a	ERVL-MaLR	LTR	-	promoter_tss	-0.360491	-3.3119	-3.3119	-3.3119	-3.3119	5.86287	5.88457	0.317613	0.329537	1897	2	2	4	0	0	0	0	0	0	0	0	0	0	0	0	0	0	1
Lx8:Slamf7	Slamf7						X	X		chr1	171641267	171652656	NA	NA	NA	Lx8	L1	LINE	-	internal/promoter_tss	0	3.82505	0	0	4.76395	6.15217	14.8015	0.0112448	0.0174739	1898	0	0	0	0	0	1	1	1	0	0	0	0	0	0	1	8	0	2
RLTR20C2_MM:Fam162b	Fam162b									chr10	51590169	51592734	NA	NA	NA	RLTR20C2_MM	ERVK	LTR	-	promoter_tss	1.65343	-1.69985	-1.69985	-1.69985	-1.69985	5.83134	4.83228	0.43669	0.446292	1899	0	1	0	0	6	0	0	0	0	0	0	0	0	0	0	0	0	0
MTB:Exoc2	Exoc2									chr13	30911250	30923130	NA	NA	NA	MTB	ERVL-MaLR	LTR	-	promoter_tss	1.66787	-1.68571	-1.68571	-1.68571	-1.68571	5.83097	4.99871	0.416038	0.425825	1900	1	0	0	0	6	0	0	0	0	0	0	0	0	0	0	0	0	0
MTB:Slc6a15	Slc6a15							X	X	chr10	103375334	103388896	MTB	ERVL-MaLR	LTR	NA	NA	NA	+	promoter_tss	3.35301	0	0	2.18957	0	5.85377	4.85447	0.433898	0.44366	1901	0	0	0	0	6	0	0	0	0	0	0	0	1	0	0	0	0	2
MMVL30-int:Zbtb8b	Zbtb8b								X	chr4	129443540	129445257	NA	NA	NA	MMVL30-int	ERV1	LTR	-	internal/promoter_tss	3.37526	0	0	0	0	5.80894	6.16197	0.290776	0.30414	1902	0	0	1	0	5	0	0	0	0	0	0	0	0	0	0	0	0	1
ID_B1:Hnrnpul1	Hnrnpul1									chr7	25736761	25740827	ID_B1	B4	SINE	NA	NA	NA	-	terminator	-1.68584	1.38236	2.72901	-1.68584	2.92964	6.27488	6.99659	0.220894	0.234786	1903	1	0	0	0	0	0	0	2	0	0	5	0	0	0	0	0	6	0
MTE2b:Tarm1	Tarm1									chr7	3495991	3496674	MTE2b	ERVL-MaLR	LTR	NA	NA	NA	-	internal	3.41946	0	0	0	0	5.81388	7.88872	0.162476	0.176361	1904	0	0	3	2	1	0	0	0	0	0	0	0	0	0	0	0	0	0
MIR3:Srsf4	Srsf4									chr4	131885492	131886130	MIR3	MIR	SINE	MamSINE1	tRNA	SINE	+	internal	-1.69995	-1.69995	-1.69995	-1.69995	3.05542	6.03408	8.49309	0.131073	0.144516	1905	0	1	0	0	0	0	0	0	0	0	0	0	0	0	0	9	0	0
L1M4:Larp1b	Larp1b				X					chr3	41024551	41029098	NA	NA	NA	L1M4	L1	LINE	+	terminator	0.508588	-2.94757	-2.94757	-2.94757	0.355196	6.00186	5.97045	0.309105	0.321362	1906	1	2	5	1	0	0	0	0	0	0	0	0	0	0	0	3	0	1
ID4_:Cyb5rl	Cyb5rl						X	X		chr4	107081094	107087296	NA	NA	NA	ID4_	ID	SINE	+	terminator	3.48224	0	0	0	0	5.82034	5.06246	0.408305	0.418539	1907	0	0	6	0	0	0	0	0	0	0	0	0	0	0	0	0	0	2
Lx7:Cd48	Cd48									chr1	171701854	171704546	Lx7	L1	LINE	NA	NA	NA	+	internal	3.48176	0	0	0	0	5.82034	5.3153	0.378625	0.389481	1908	0	0	6	0	0	0	0	0	0	0	0	0	0	0	0	0	0	0
MIRb:Btbd18	Btbd18						X	X		chr2	84661159	84661430	MIRb	MIR	SINE	NA	NA	NA	+	internal	0	3.81513	5.04175	4.18913	2.03014	6.37854	19.2917	0.00169585	0.00350305	1909	0	0	0	0	0	1	1	1	2	1	4	1	1	3	0	1	0	2
MT2A:Zfp869	Zfp869									chr8	69708465	69710685	NA	NA	NA	MT2A	ERVL	LTR	-	internal/promoter_tss	3.13056	3.8194	3.91859	4.93609	2.13574	6.43326	8.82918	0.116075	0.129869	1910	0	0	0	0	5	1	1	1	1	1	1	1	1	7	0	0	1	0
L2:Tmtc3	Tmtc3									chr10	100456625	100457047	L2	L2	LINE	NA	NA	NA	-	internal	1.39911	0	5.16164	3.0836	2.79434	6.23944	12.8302	0.0250232	0.0344595	1911	0	0	1	0	0	0	0	0	1	1	6	1	1	0	2	0	0	0
MIRb:Fam188a	Fam188a									chr2	12349842	12350928	MIRb	MIR	SINE	NA	NA	NA	-	internal	-2.4503	-2.4503	2.70885	0.637218	1.77226	6.37543	12.6234	0.0271758	0.0370003	1912	1	1	0	0	0	0	0	0	1	1	6	1	1	0	0	6	0	0
MLTR18C_MM:Polg2	Polg2									chr11	106768471	106770214	NA	NA	NA	MLTR18C_MM	ERVK	LTR	-	internal	0	0	5.15978	3.08651	0	6.15485	18.3143	0.00257727	0.00500525	1913	0	0	0	0	0	0	0	0	1	1	6	1	1	0	0	0	0	0
ID_B1:Slc36a1	Slc36a1									chr11	55232706	55233501	NA	NA	NA	ID_B1	B4	SINE	+	terminator	0	0	5.16362	3.08062	3.30577	6.2503	16.6971	0.0051116	0.00885867	1915	0	0	0	0	0	0	0	0	1	1	6	1	1	0	2	1	0	0
ORR1A0:Brca2	Brca2									chr5	150529199	150529469	ORR1A0	ERVL-MaLR	LTR	NA	NA	NA	+	promoter_tss	0	4.71146	2.55028	4.44002	2.1272	6.29094	16.1738	0.00636486	0.0106792	1916	0	0	0	0	0	1	2	3	1	0	0	1	2	3	0	0	1	0
B3A:Plcd4	Plcd4							X		chr1	74564812	74565259	B3A	B2	SINE	NA	NA	NA	+	internal	0	0	5.27562	3.02224	1.98583	6.21671	12.6727	0.0266469	0.0364501	1917	0	0	0	0	0	0	0	0	1	0	8	0	2	0	1	0	0	1
ORR1A2:Gm13119	Gm13119									chr4	144359110	144361608	ORR1A2	ERVL-MaLR	LTR	NA	NA	NA	+	promoter_tss	0	3.82227	4.69157	2.91321	2.01631	6.20392	11.5901	0.0408578	0.0524509	1918	0	0	0	0	0	1	1	1	4	0	1	0	0	2	0	1	0	0
L2:Hexdc	Hexdc					X			X	chr11	121218738	121221082	NA	NA	NA	L2	L2	LINE	+	internal	0	3.82161	4.84041	0	3.68951	6.2617	15.4137	0.00873332	0.0140627	1919	0	0	0	0	0	1	1	1	2	1	3	0	0	0	0	4	0	2
MTE2a:Cers4	Cers4				X					chr8	4473001	4515554	MTE2a	ERVL-MaLR	LTR	NA	NA	NA	+	internal	0	4.1677	3.34544	4.4415	2.02707	6.23938	14.7558	0.0114582	0.0177516	1920	0	0	0	0	0	1	1	2	0	1	1	1	2	3	0	1	0	1
B3A:Entpd5	Entpd5									chr12	84378193	84379179	B3A	B2	SINE	NA	NA	NA	-	terminator	0	4.35929	5.0648	4.0355	0	6.40595	11.7174	0.0388718	0.0504716	1921	0	0	0	0	0	1	0	4	0	0	8	2	2	0	0	0	0	0
L2c:Zfp740	Zfp740			X						chr15	102204883	102205228	NA	NA	NA	L2c	L2	LINE	+	internal	0	4.51433	0	0	0	5.92553	13.9606	0.0158616	0.023336	1922	0	0	0	0	0	2	1	2	0	0	0	0	0	0	0	0	0	1
B4A:Qser1	Qser1							X	X	chr2	104770675	104776199	B4A	B4	SINE	NA	NA	NA	-	terminator	-1.6883	2.82383	-1.6883	-1.6883	-1.6883	5.94835	13.7405	0.0173443	0.0251911	1923	1	0	0	0	0	2	1	2	0	0	0	0	0	0	0	0	0	2
ORR1B1-int:Pigk	Pigk				X					chr3	152827783	152829743	ORR1B1-int	ERVL-MaLR	LTR	L1MC4a	L1	LINE	+	internal	0	4.51544	0	0	0	5.92553	12.9296	0.0240472	0.0333401	1924	0	0	0	0	0	2	1	2	0	0	0	0	0	0	0	0	0	1
BGLII:Nfu1	Nfu1									chr6	87009389	87012906	BGLII	ERVK	LTR	NA	NA	NA	+	promoter_tss	0	4.51513	0	0	0	5.92553	13.2352	0.0212713	0.0300206	1925	0	0	0	0	0	2	1	2	0	0	0	0	0	0	0	0	0	0
MIRb:N4bp2	N4bp2							X	X	chr5	65788141	65790017	MIRb	MIR	SINE	RLTR17B_Mm	ERVK	LTR	+	internal/promoter	0	4.51431	0	0	0	5.92553	13.9751	0.0157684	0.0232599	1926	0	0	0	0	0	2	1	2	0	0	0	0	0	0	0	0	0	2
MT2A:Mtmr2	Mtmr2							X	X	chr9	13782382	13783605	NA	NA	NA	MT2A	ERVL	LTR	+	internal	0	4.51285	3.86483	0	2.79271	6.14356	13.2912	0.0207975	0.0294944	1927	0	0	0	0	0	2	1	2	1	0	2	0	0	0	2	0	0	2
L1MA4:Tdrd5	Tdrd5									chr1	156271981	156276561	L1MA4	L1	LINE	NA	NA	NA	-	terminator	0	4.51504	0	0	0	5.92553	13.3211	0.0205484	0.0292222	1928	0	0	0	0	0	2	1	2	0	0	0	0	0	0	0	0	0	0
[truncated: 110 more rows]

## Sheet: Chimeric transcripts Deng_2014
Figure 3–Source Data 1. Chimeric Transcript Analysis. Chimeric transcripts previously identified from the datasets of Xue (Xue et al., 2013), and Deng (Deng et al., 2014) by Modzelewski et al. (Modzelewski et al., 2021), and de novo identified ones according to Modzelewski et al (Modzelewski et al., 2021) were analyzed across four pairwise comparisons and annotated with their corresponding Venn d…
[truncated: 4,018 more rows]
[truncated: 142 more columns]

[truncated: 5 more sheets: Novel_processed_junctions, FOURWAY_2cWT_vs_2cKO_D_chimeric, FOURWAY_8cWT_vs_8cKO_D_chimeric, FOURWAY_8cWT_vs_2cWT_D_chimeric, FOURWAY_8cKO_vs_2cKO_D_chimeric]
