# Supplementary material for: SETDB1 enables development beyond cleavage stages by extinguishing the MERVL-driven two-cell totipotency transcriptional program in the mouse embryo
Source: eLife. 2026 Feb 16;15:RP109248. doi: 10.7554/eLife.109248 (PMC12908936; doi:10.7554/eLife.109248)
Supplement: Figure 7—source data 1. — Overrepresentation analysis of up/down pairwise DEGs using gene sets from Macfarlan et al., 2012 (MERVL-chimeric), Yang et al., 2024 (MT2i), and Vega-Sendino et al., 2024 (Duxbl KO). ORA was performed if there were more than 50 genes using function enricher from R package ClusterProfiler (v4.14.4). Results are shown only for sets with significant enrichment. [file elife-109248-fig7-data1.xlsx]

## Sheet: ora_up_set_2cWT-set_2cKO_fig7
Figure 7–Source Data 1. ORA with MERVL-Chimeric, MT2i, and Duxbl KO Gene Sets. Overrepresentation analysis of up/down pairwise DEGs using gene sets from Macfarlan et al. (Macfarlan et al., 2012) (MERVL-chimeric), Yang et al. (Yang et al., 2024) (MT2i), and Vega-Sendino et al. (Vega-Sendino et al., 2024) (Duxbl KO). ORA was performed if there were more than 50 genes using function enricher from R …
ID	Description	GeneRatio	BgRatio	RichFactor	FoldEnrichment	zScore	pvalue	p.adjust	qvalue	geneID	Count
E2C_up-regulated_in_KO	E2C_up-regulated_in_KO	3/16	114/1272	0.0263158	2.09211	1.3788	0.166823	0.3972	0.3972	Psat1/Mt1/Rpl10l	3
L2C_down-regulated_in_KO	L2C_down-regulated_in_KO	12/16	783/1272	0.0153257	1.21839	1.11198	0.1986	0.3972	0.3972	Ipo4/Eif3d/Gm20472/Gm6877/Cln8/Tma16/Rps20/Tgs1/Srsf1/Tufm/Nsa2-ps1/Sdad1	12
Distal	Distal	1/16	200/1272	0.005	0.3975	-1.04716	0.936378	0.992981	0.992981	Rps20	1
L2C_up-regulated_in_KO	L2C_up-regulated_in_KO	1/16	337/1272	0.00296736	0.235905	-1.84584	0.992981	0.992981	0.992981	Hand1	1

## Sheet: ora_down_set_2cWT-set_2cKO_fig7
Figure 7–Source Data 1. ORA with MERVL-Chimeric, MT2i, and Duxbl KO Gene Sets. Overrepresentation analysis of up/down pairwise DEGs using gene sets from Macfarlan et al. (Macfarlan et al., 2012) (MERVL-chimeric), Yang et al. (Yang et al., 2024) (MT2i), and Vega-Sendino et al. (Vega-Sendino et al., 2024) (Duxbl KO). ORA was performed if there were more than 50 genes using function enricher from R …
ID	Description	GeneRatio	BgRatio	RichFactor	FoldEnrichment	zScore	pvalue	p.adjust	qvalue	geneID	Count
E2C_down-regulated_in_KO	E2C_down-regulated_in_KO	22/47	242/1272	0.0909091	2.46035	4.9431	9.08999e-06	8.18099e-05	4.78421e-05	Cwc22/Gm5117/Gm24745/Gm5435/Gm50179/Gm47808/Usp17lc/Gm4526/Gm14742/Eif4a3l2/Gm12183/Ankrd22/9130227L01Rik/Eif4a3l1/Olfr787/Gm47381/B930095G15Rik/Lrrn4/Gm49064/Gm14401/Fgf1/Gm47897	22
MT2 proximal/chimeric	MT2 proximal/chimeric	24/47	316/1272	0.0759494	2.05548	4.23759	7.08407e-05	0.000318783	0.000186423	Cwc22/Pramef25/Gm24745/Gm47808/Arhgef26/Gm5939/Usp17lc/Gm14742/Eif4a3l2/Apol7e/Slc66a2/Ercc4/Gm35572/Gm44739/Lig1/Ankrd22/9130227L01Rik/Eif4a3l1/Olfr787/Gm47381/Lrrn4/Gm49064/Fgf1/Gm47897	24
Vega_Duxbl_up_in_KO	Vega_Duxbl_up_in_KO	4/47	28/1272	0.142857	3.86626	3.00288	0.0174632	0.0523896	0.0306372	Arhgef26/Gm5939/Dennd4c/Snw1	4
L2C_down-regulated_in_KO	L2C_down-regulated_in_KO	35/47	783/1272	0.0446999	1.20975	1.85345	0.0418528	0.0941688	0.0550695	Cwc22/Gm5117/Pramef25/Gm24745/Gm5435/Gm50179/Gm47808/Arhgef26/Gm5939/Usp17lc/BC080695/Gm14742/Eif4a3l2/Apol7e/Slc66a2/Ercc4/Gm12183/Gm35572/Gm38153/Gm44739/Lig1/Ankrd22/Cby3/9130227L01Rik/Eif4a3l1/Olfr787/Gm47381/A930027P06Rik/Gm18283/B930095G15Rik/Lrrn4/Gm49064/Gm14401/Fgf1/Gm47897	35
Distal	Distal	10/47	200/1272	0.05	1.35319	1.06532	0.191064	0.343915	0.20112	Gm5117/Gm5435/Gm50179/BC080695/Gm12183/Gm38153/A930027P06Rik/Gm18283/B930095G15Rik/Gm14401	10
Vega_Duxbl_down_in_KO	Vega_Duxbl_down_in_KO	1/47	12/1272	0.0833333	2.25532	0.855487	0.364789	0.547184	0.319991	Gm46992	1
MacFarlan_MERVL_chimeric	MacFarlan_MERVL_chimeric	2/47	44/1272	0.0454545	1.23017	0.304255	0.490513	0.63066	0.368807	Zfp352/Apol7e	2
E2C_up-regulated_in_KO	E2C_up-regulated_in_KO	2/47	114/1272	0.0175439	0.474804	-1.15073	0.935298	0.998235	0.583763	Gm5542/Gm9131	2
L2C_up-regulated_in_KO	L2C_up-regulated_in_KO	5/47	337/1272	0.0148368	0.401541	-2.50898	0.998235	0.998235	0.583763	Neat1/E130317F20Rik/Triml2/Gm6803/Gm8607	5

## Sheet: ora_up_set_8cWT-set_8cKO_fig7
Figure 7–Source Data 1. ORA with MERVL-Chimeric, MT2i, and Duxbl KO Gene Sets. Overrepresentation analysis of up/down pairwise DEGs using gene sets from Macfarlan et al. (Macfarlan et al., 2012) (MERVL-chimeric), Yang et al. (Yang et al., 2024) (MT2i), and Vega-Sendino et al. (Vega-Sendino et al., 2024) (Duxbl KO). ORA was performed if there were more than 50 genes using function enricher from R …
ID	Description	GeneRatio	BgRatio	RichFactor	FoldEnrichment	zScore	pvalue	p.adjust	qvalue	geneID	Count
L2C_up-regulated_in_KO	L2C_up-regulated_in_KO	13/15	337/1272	0.0385757	3.27122	5.31029	1.62147e-06	6.48588e-06	5.12043e-06	Neat1/Eomes/Ypel1/Ephb4/Akr1b8/Ifngr2/4833418N02Rik/Chac1/Gm48591/Zscan4-ps1/Epha2/Kcnq4/Pnpla1	13
E2C_up-regulated_in_KO	E2C_up-regulated_in_KO	3/15	114/1272	0.0263158	2.23158	1.50491	0.144508	0.289016	0.228171	Eomes/Gpr50/Zscan4-ps1	3
MT2 proximal/chimeric	MT2 proximal/chimeric	1/15	316/1272	0.00316456	0.268354	-1.6382	0.986585	0.999999	0.789473	Fam83b	1
L2C_down-regulated_in_KO	L2C_down-regulated_in_KO	1/15	783/1272	0.00127714	0.108301	-4.39436	0.999999	0.999999	0.789473	Fam83b	1

## Sheet: ora_down_set_8cWT-set_8cKO_fig7
Figure 7–Source Data 1. ORA with MERVL-Chimeric, MT2i, and Duxbl KO Gene Sets. Overrepresentation analysis of up/down pairwise DEGs using gene sets from Macfarlan et al. (Macfarlan et al., 2012) (MERVL-chimeric), Yang et al. (Yang et al., 2024) (MT2i), and Vega-Sendino et al. (Vega-Sendino et al., 2024) (Duxbl KO). ORA was performed if there were more than 50 genes using function enricher from R …
ID	Description	GeneRatio	BgRatio	RichFactor	FoldEnrichment	zScore	pvalue	p.adjust	qvalue	geneID	Count
E2C_down-regulated_in_KO	E2C_down-regulated_in_KO	62/149	242/1272	0.256198	2.18714	7.47254	6.41662e-12	5.77496e-11	3.37717e-11	AU015228/Gm5117/Gm7102/Gm1995/Nat8f2/Gm48754/Antxr1/Gm33466/Gm2027/Tmem132c/Spz1/Gm4971/Gm47808/Gm5435/Cwc22/Gm12789/Gm47739/Olfr374/Platr31/Gm5157/Arsk/Fgf1/Gm48799/Gm48422/Gm12183/Ubtfl1/Gm48829/Slc19a3/Gm36627/Gm1527/Gm9586/Gm5577/Olfr881/Gm49015/Gm16239/Gm47357/Gm48764/Esp24/Gm47510/Olfr118/2900079G21Rik/Gm49030/Gm11784/Gm47896/Gm42879/AA684185/Gm47924/Gm21542/Gm44693/Gm50216/Gm48578/Zswim2/G…	62
MT2 proximal/chimeric	MT2 proximal/chimeric	56/149	316/1272	0.177215	1.51287	3.82912	0.000159358	0.00071711	0.000419362	Nat8f2/Gm44739/Chit1/Gm48754/Antxr1/Gm33466/Gm2027/Tmem132c/Gm47808/Pramef25/Cwc22/Gm12789/Gm47739/Platr31/Trak2/Arsk/Ccser1/Fgf1/Gm48799/Gm48422/Colgalt2/Gm5939/Ubtfl1/Gm48829/Gm12724/Bicc1/Olfr881/Gm49015/Gm16239/Dst/Gm47357/Gm48764/Esp24/Gm47510/Gm35572/Olfr118/2900079G21Rik/Gm49030/Gm47896/Gm25775/Gm47924/Gm44693/Gm50216/Gm48578/Sva/Gm14742/Olfr815/Gm8016/Gm11033/Gm48383/Aqr/Cracr2a/A530040E1…	56
E2C_up-regulated_in_KO	E2C_up-regulated_in_KO	26/149	114/1272	0.22807	1.94702	3.85861	0.000317082	0.000951245	0.000556283	Gm4850/Gm5788/Gm37567/Spopfm2/Btg1/Gm36976/Gm28645/AF067061/Gm11544/Gm21319/Gm20767/Sowahc/Tcstv1/Dsel/Gm21762/Gm21761/Gm11232/Tdpoz1/Gm9131/A430060F13Rik/Dgke/AA623943/Gm18632/Esyt3/Tdpoz9/Ccdc166	26
Vega_Duxbl_up_in_KO	Vega_Duxbl_up_in_KO	9/149	28/1272	0.321429	2.74401	3.39776	0.00316348	0.00711783	0.00416247	Antxr1/Tmem132c/Gm5939/Dst/AA623943/2900079G21Rik/Aqr/Gm11543/Gm6494	9
MacFarlan_MERVL_chimeric	MacFarlan_MERVL_chimeric	9/149	44/1272	0.204545	1.74619	1.83422	0.0626104	0.112699	0.0659057	Zfp352/Tdpoz4/Trak2/Arsk/Tcstv3/Ubtfl1/Slc19a3/Tdpoz1/Rfpl4b	9
L2C_down-regulated_in_KO	L2C_down-regulated_in_KO	100/149	783/1272	0.127714	1.09028	1.48356	0.0807116	0.121067	0.0707997	AU015228/Gm5117/Gm7102/1700017B05Rik/Nat8f2/Gm44739/Chit1/Usp17ld/Gm48754/Antxr1/Gm33466/Gm2027/Tmem132c/Spz1/Gm4971/Gm43694/Gm47808/Gm5435/Gm44183/Gm12623/Pramef25/Cwc22/Gm12789/Gm47739/Olfr374/Platr31/Arg2/Trak2/Arsk/Ccser1/Fgf1/Gm48799/Gm48422/Gm12183/Colgalt2/Gm5939/Ubtfl1/Gm48829/Slc19a3/Gm36627/Gm12724/A930027P06Rik/Gm8674/Bicc1/Gm1527/Gm9586/Gm6877/Gm5577/Gm38153/Olfr881/Gm49015/Gm10552/49…	100
Distal	Distal	29/149	200/1272	0.145	1.23785	1.33414	0.113789	0.1463	0.0855554	Gm5117/Gm7102/Usp17ld/Spz1/Gm4971/Gm5435/Gm12623/Arg2/Gm12183/Slc19a3/Gm36627/A930027P06Rik/Gm1527/Gm9586/Gm5577/Gm38153/Gm10552/Gm11784/Gm42879/Gm48424/AA684185/Calml4/Gm21542/Zswim2/Gm18914/Gm18283/Gm31904/Cyp2c67/Gm15930	29
Vega_Duxbl_down_in_KO	Vega_Duxbl_down_in_KO	1/149	12/1272	0.0833333	0.711409	-0.365733	0.777309	0.874473	0.511388	Gm46992	1
L2C_up-regulated_in_KO	L2C_up-regulated_in_KO	15/149	337/1272	0.0445104	0.379981	-4.83381	1	1	0.584795	Spopfm1/Gm4982/Tdpoz3/Dsel/2810029C07Rik/Drc1/Gm18632/Drc3/Trpc1/Gm5541/Fbxl8/Cdcp1/Snn/Slc25a35/Dubr	15

## Sheet: ora_up_set_8cWT-set_2cWT_fig7
Figure 7–Source Data 1. ORA with MERVL-Chimeric, MT2i, and Duxbl KO Gene Sets. Overrepresentation analysis of up/down pairwise DEGs using gene sets from Macfarlan et al. (Macfarlan et al., 2012) (MERVL-chimeric), Yang et al. (Yang et al., 2024) (MT2i), and Vega-Sendino et al. (Vega-Sendino et al., 2024) (Duxbl KO). ORA was performed if there were more than 50 genes using function enricher from R …
ID	Description	GeneRatio	BgRatio	RichFactor	FoldEnrichment	zScore	pvalue	p.adjust	qvalue	geneID	Count
L2C_up-regulated_in_KO	L2C_up-regulated_in_KO	38/112	337/1272	0.11276	1.28063	1.86635	0.0418803	0.335042	0.308592	Sh3d21/H1f4/Tagln2/Triml2/Ccn1/H1f2/Neat1/Ssbp4/Prx/Fhl3/Atp8b2/Hand1/Mccc2/Kmt2a/Gm43313/Gm38043/Cilp/Mpp3/Gprc5a/Slc38a2/Bola3/Zfp273/Gm37745/4933437G19Rik/2010008C14Rik/Phactr1/Inka2/Lgals9/Akr1b8/Tbx20/4632415L05Rik/Lpin1/Cklf/Ifngr2/Lhfpl5/Gm3325/Adm/Zfp105	38
MacFarlan_MERVL_chimeric	MacFarlan_MERVL_chimeric	6/112	44/1272	0.136364	1.5487	1.15058	0.184102	0.73641	0.678272	Naalad2/Pemt/Arih2/Fbxo15/Gnpnat1/Atxn3	6
Distal	Distal	20/112	200/1272	0.1	1.13571	0.649376	0.297255	0.792679	0.730099	Rmc1/Cyp2s1/G430049J08Rik/Acsl4/Rps20/Gm13212/Cabp7/Acyp1/Gm14401/Ak4/Gm13510/Gm16310/Nadsyn1/1700030N03Rik/Gm12617/Gm12844/Gm49331/Tmppe/Cct8/Zfp511	20
L2C_down-regulated_in_KO	L2C_down-regulated_in_KO	65/112	783/1272	0.083014	0.942802	-0.801783	0.817249	0.999789	0.920858	Eef2/Gldc/Ctsa/Slc66a2/Naalad2/Pemt/Cad/Lig1/Slc5a6/Rflnb/Rmc1/Rps27/Ipo7/Slc39a4/Cyp2s1/G430049J08Rik/Trappc3/Acsl4/Kifc3/Mrpl15/Rps20/Gm13212/Gnpnat1/Eif3d/Frrs1/Cabp7/Sgk3/Ak3l2-ps/Acyp1/Gm10095/Tbrg1/Ppie/Gprc5c/Gm14401/Scrib/Ak4/Ercc4/Chrdl2/Pramel7/Parp8/Arhgef26/Gm4332/Gm16310/Smyd5/Nadsyn1/Mcm7/Gm26298/Gpr161/Gm10145/1700030N03Rik/Gm12617/Gm25110/Gm12844/Gm49331/Gm47321/Bud13/Tmppe/Cct8/N…	65
Vega_Duxbl_up_in_KO	Vega_Duxbl_up_in_KO	1/112	28/1272	0.0357143	0.405612	-0.987851	0.926459	0.999789	0.920858	Arhgef26	1
E2C_up-regulated_in_KO	E2C_up-regulated_in_KO	5/112	114/1272	0.0438596	0.49812	-1.74442	0.980617	0.999789	0.920858	Sfn/Klf5/Calcoco2/Rps19/Trim43b	5
MT2 proximal/chimeric	MT2 proximal/chimeric	18/112	316/1272	0.056962	0.646926	-2.24871	0.992976	0.999789	0.920858	Slc66a2/Naalad2/Pemt/Lig1/Kifc3/Gnpnat1/Sgk3/Ppie/Gprc5c/Ercc4/Parp8/Arhgef26/Gm26298/Gpr161/Gm25110/Bud13/Gm16513/Prelid2	18
E2C_down-regulated_in_KO	E2C_down-regulated_in_KO	9/112	242/1272	0.0371901	0.422373	-3.10162	0.999789	0.999789	0.920858	G430049J08Rik/Frrs1/Sgk3/Ppie/Gm14401/Gm13510/Gm12617/Gm16513/Nfam1	9

## Sheet: ora_down_set_8cWT-set_2cWT_fig7
Figure 7–Source Data 1. ORA with MERVL-Chimeric, MT2i, and Duxbl KO Gene Sets. Overrepresentation analysis of up/down pairwise DEGs using gene sets from Macfarlan et al. (Macfarlan et al., 2012) (MERVL-chimeric), Yang et al. (Yang et al., 2024) (MT2i), and Vega-Sendino et al. (Vega-Sendino et al., 2024) (Duxbl KO). ORA was performed if there were more than 50 genes using function enricher from R …
ID	Description	GeneRatio	BgRatio	RichFactor	FoldEnrichment	zScore	pvalue	p.adjust	qvalue	geneID	Count
E2C_down-regulated_in_KO	E2C_down-regulated_in_KO	82/262	242/1272	0.338843	1.64507	5.67752	4.36206e-08	3.92585e-07	2.29582e-07	AU015228/Gm5117/AA414992/Gm48754/Gm12789/Gm33466/Gm7102/Gm4971/Spz1/Gm48764/Gm18856/Slc19a3/Gm1995/Gm49030/Gm47808/Antxr1/Gm9586/Gm12626/Gm9621/Gm21542/Gm48799/Gm26137/Platr31/Gm40910/Nat8f2/Gm48422/Arsk/Gm48829/Gm47739/Gm48399/Gm16239/Synm/Gm50331/Gm14929/Gm50216/Olfr881/Tmem132c/Ighv1-60/Gm49015/Gm48271/Gm48383/Gm47357/Gm48492/Gm49858/Gm6978/Ubtfl1/C78334/Tacr3/Gm47924/Gm45593/AA543401/Gm42808/…	82
MT2 proximal/chimeric	MT2 proximal/chimeric	84/262	316/1272	0.265823	1.29056	3.03328	0.00185207	0.00763601	0.00446551	AA414992/Gm48754/Gm12789/Gm33466/Gm48764/Chit1/Bicc1/Gm49030/Gm47808/Gm43049/Antxr1/Echdc3/Gm48799/Fbxo34/Gm26137/Platr31/Gm40910/Gm44739/Nat8f2/Gm48422/Arsk/Gm48829/Ccser1/Gm47739/Gm48399/Cpd/Gm16239/Synm/Gm50331/Gm14929/Gm50216/Gm6909/Olfr881/Tmem132c/Ighv1-60/Gm49015/Gm48271/Gm48383/Gm47357/1600010M07Rik/Gm48492/Gm49858/Gm6978/Ubtfl1/C78334/Tacr3/Gm47924/Gm45593/Gm18204/Gm13360/Dpp9/Gm28940/Gm…	84
E2C_up-regulated_in_KO	E2C_up-regulated_in_KO	36/262	114/1272	0.315789	1.53315	3.03743	0.00254534	0.00763601	0.00446551	Gm21761/Gm36976/Gm4850/Gm11544/Gm5788/Zscan5b/Spopfm2/Gm20767/A430060F13Rik/Tcstv1/Gm28645/Dgke/Gm37567/Dusp5/Tdpoz1/AF067061/Gm21762/Sowahc/C2cd4b/Gm11232/Gpr50/Dsel/Lysmd1/Gm21319/Gm8953/AA623943/Mid1ip1/Ttyh1/Slc25a42/Gm5442/Rbm8a2/Gm6489/Gm7286/Esyt3/2810405F17Rik/Gm9458	36
Vega_Duxbl_up_in_KO	Vega_Duxbl_up_in_KO	11/262	28/1272	0.392857	1.90731	2.47164	0.017291	0.0389048	0.0227513	Antxr1/Gm11543/Gm48399/Tmem92/Tmem132c/AA623943/Gm28940/Gm21939/Tmem215/Gm35974/2900079G21Rik	11
MacFarlan_MERVL_chimeric	MacFarlan_MERVL_chimeric	11/262	44/1272	0.25	1.21374	0.734643	0.284636	0.512344	0.299616	Zfp352/Mbd5/Slc19a3/Tdpoz1/AF067063/Arsk/Rfpl4b/Ubtfl1/Ei24/Tcstv3/Rnpc3	11
L2C_down-regulated_in_KO	L2C_down-regulated_in_KO	157/262	783/1272	0.200511	0.973473	-0.609515	0.752594	0.958208	0.560356	AU015228/Gm5117/AA414992/Gm48754/1700017B05Rik/Gm12789/Gm33466/Gm44183/Gm7102/Gm12623/Gm4799/Gm4971/Cul3/Spz1/Gm48764/Gm43694/Slc19a3/Chit1/Gm8634/Bicc1/Gm49030/Gm47808/Gm43049/Antxr1/Gm9586/Cnnm2/Echdc3/Gm43042/Gm12626/Fem1a/Gm9621/Pld6/Gm21542/Gm48799/1700093K21Rik/Fbxo34/Gm26137/Arg2/Platr31/H2-Q6/Gm40910/Gm44739/Nat8f2/1700069L16Rik/Gm48422/Arsk/Gm48829/Usp17ld/Ccser1/Bcor/Gm47739/Gm48399/Cpd…	157
Distal	Distal	38/262	200/1272	0.19	0.922443	-0.608279	0.757131	0.958208	0.560356	Gm5117/Gm7102/Gm12623/Gm4799/Gm4971/Spz1/Slc19a3/Gm9586/Cnnm2/Gm12626/Gm9621/Gm21542/1700093K21Rik/Arg2/Usp17ld/Calml4/Atl3/Gm10552/Gm42808/Gm16344/Gtpbp4-ps6/Gm12612/Gm42653/Fastkd5/Gm50180/Gm16345/Gal3st2c/Tmem215/Ephb1/4933409D19Rik/Gm16184/Rbbp6/Chst7/Gm43088/Gm4766/Gm47043/Gm5577/Gm47430	38
Vega_Duxbl_down_in_KO	Vega_Duxbl_down_in_KO	1/262	12/1272	0.0833333	0.40458	-1.05509	0.938038	0.958208	0.560356	Tmem150c	1
L2C_up-regulated_in_KO	L2C_up-regulated_in_KO	59/262	337/1272	0.175074	0.849978	-1.63541	0.958208	0.958208	0.560356	Spopfm1/9930038B18Rik/C330011M18Rik/Gata2/Gm11487/Tdpoz3/Zfp324/Osr2/Dsel/Gm12569/Zscan4-ps3/Gm11756/Dennd2c/Pax3/Hbegf/Gm19052/Cd209g/H2bfm/Gm47919/Pwwp3b/2810029C07Rik/Cpa2/Gm8953/Cx3cl1/Trpc1/Lrrc74b/Nmrk1/Prrx2/Maneal/Bnip5/Gm48369/Gm21939/9530077C05Rik/Gm27711/Fbxl8/Gm11236/Fgf10/D230049E03Rik/Hnf1b/Gm3854/Snn/4921536K21Rik/Gm5442/Gpd1/Gm6489/Gm17232/Pacc1/Ephx2/Ltbp2/Ehhadh/Gm12794/Ephb4/Gm…	59

## Sheet: ora_up_set_8cKO-set_2cKO_fig7
Figure 7–Source Data 1. ORA with MERVL-Chimeric, MT2i, and Duxbl KO Gene Sets. Overrepresentation analysis of up/down pairwise DEGs using gene sets from Macfarlan et al. (Macfarlan et al., 2012) (MERVL-chimeric), Yang et al. (Yang et al., 2024) (MT2i), and Vega-Sendino et al. (Vega-Sendino et al., 2024) (Duxbl KO). ORA was performed if there were more than 50 genes using function enricher from R …
ID	Description	GeneRatio	BgRatio	RichFactor	FoldEnrichment	zScore	pvalue	p.adjust	qvalue	geneID	Count
L2C_down-regulated_in_KO	L2C_down-regulated_in_KO	102/144	783/1272	0.130268	1.1507	2.4291	0.0089	0.0801	0.0749473	Eef2/Ctsa/Ipo7/Gldc/Cad/Slc5a6/Rps20/Eif3d/Pramel7/Rps27/Acsl4/Sdad1/Slc39a4/Gm6877/Tufm/G430049J08Rik/Ipo4/Frrs1/Rmc1/Noc2l/Cln8/Tma16/Gm6278/Klhdc4/Ctu2/Cxadr/Pwp1/Gm20472/Emc3/Mrpl15/Taldo1/Mdn1/Zpr1/Jmy/Rars/Smyd5/Naalad2/Srsf1/Gm10095/Stmn3/Gpr161/Tmppe/Gm13212/Ppan/Wdr81/Naf1/Slc8b1/2900097C17Rik/Cyp2s1/Gm13147/Cct8/Kifc3/Pum3/Lrrc59/Dhx58/Pemt/Nsa2-ps1/Polr3g/Sardh/Slc66a2/Ndufa12/Slc6a8/G…	102
E2C_up-regulated_in_KO	E2C_up-regulated_in_KO	16/144	114/1272	0.140351	1.23977	0.958264	0.207308	0.903581	0.845456	Sfn/Trim43b/Btg1/Klf5/Rps19/Gm12845/Calcoco2/Spic/Psat1/Mt1/Rpl10l/Hes1/2410002F23Rik/Gpn3/Rpsa-ps10/Gpkow	16
MacFarlan_MERVL_chimeric	MacFarlan_MERVL_chimeric	6/144	44/1272	0.136364	1.20455	0.493192	0.37986	0.903581	0.845456	Fbxo15/Naalad2/Arih2/Pemt/Tsen2/Tdpoz2	6
Vega_Duxbl_down_in_KO	Vega_Duxbl_down_in_KO	2/144	12/1272	0.166667	1.47222	0.587018	0.401592	0.903581	0.845456	Pfkfb3/Ttyh2	2
Distal	Distal	20/144	200/1272	0.1	0.883333	-0.641895	0.774733	1	0.935673	Rps20/Acsl4/G430049J08Rik/Rmc1/Zpr1/Tmppe/Gm13212/Cyp2s1/Gm13147/Cct8/Lrrc59/Sardh/Gm12617/Zscan26/Gm6558/Dhx33/Zfp511/Ctag2l1/Gm14401/Neto2	20
Vega_Duxbl_up_in_KO	Vega_Duxbl_up_in_KO	1/144	28/1272	0.0357143	0.315476	-1.30815	0.966712	1	0.935673	Aqr	1
L2C_up-regulated_in_KO	L2C_up-regulated_in_KO	22/144	337/1272	0.0652819	0.576657	-3.23744	0.999771	1	0.935673	Hand1/Ccn1/Gm12845/Tagln2/H1f2/Nupr1/Gramd1b/4632415L05Rik/Sh3d21/Drc1/H1f4/Osbpl7/Gm2245/Cilp/Atp8b2/Kcnq1ot1/Gm38043/Acbd4/Ndufv3/Gm4982/Inka2/Gm48369	22
MT2 proximal/chimeric	MT2 proximal/chimeric	13/144	316/1272	0.0411392	0.363397	-4.66212	1	1	0.935673	Pwp1/Naalad2/Gpr161/Kifc3/Pemt/Polr3g/Slc66a2/Parp8/Ppie/Ddx24/Aqr/Myc/Sgk3	13
E2C_down-regulated_in_KO	E2C_down-regulated_in_KO	6/144	242/1272	0.0247934	0.219008	-4.82209	1	1	0.935673	G430049J08Rik/Frrs1/Gm12617/Ppie/Sgk3/Gm14401	6

## Sheet: ora_down_set_8cKO-set_2cKO_fig7
Figure 7–Source Data 1. ORA with MERVL-Chimeric, MT2i, and Duxbl KO Gene Sets. Overrepresentation analysis of up/down pairwise DEGs using gene sets from Macfarlan et al. (Macfarlan et al., 2012) (MERVL-chimeric), Yang et al. (Yang et al., 2024) (MT2i), and Vega-Sendino et al. (Vega-Sendino et al., 2024) (Duxbl KO). ORA was performed if there were more than 50 genes using function enricher from R …
ID	Description	GeneRatio	BgRatio	RichFactor	FoldEnrichment	zScore	pvalue	p.adjust	qvalue	geneID	Count
E2C_down-regulated_in_KO	E2C_down-regulated_in_KO	88/323	242/1272	0.363636	1.43203	4.35555	1.583e-05	0.00012664	6.66527e-05	AA414992/Gm5117/Gm9621/AU015228/Gm18856/AA543401/Gm47808/Gm48754/Gm24745/Gm28826/Gm12789/Ighv1-60/Gm7627/Gtpbp4-ps3/Gm32932/Ttc30b/Usp17lc/9130227L01Rik/Gm21542/Gm33466/Spz1/Eif4a3l2/Gm3631/Gm47897/Vmn1r227/Gm45593/Synm/Gm48799/Gm45659/Gm48492/Gm50179/Gm12626/Gm4971/Gm44660/Gm48764/Gm9519/Gm48829/Eif4a3l1/Gm16345/Gm13964/Gm29761/Gal3st2/2610206C17Rik/Gm48271/Gm15362/Arsk/Gm44168/Slc19a3/Gm50331/G…	88
L2C_up-regulated_in_KO	L2C_up-regulated_in_KO	107/323	337/1272	0.317507	1.25037	3.12631	0.00128623	0.00514493	0.00270786	Ephb4/Gm11487/Neat1/Zscan4f/Chac1/Zscan4-ps3/Gm11715/Msx1/Eomes/Osr2/Tfpi/Gm6489/Zscan4-ps1/Sp9/Sox4/Hbegf/Grasp/Gm5698/4921536K21Rik/9130230N09Rik/Gm11756/Ypel1/Lbh/Pcdh10/Hey2/Cotl1/Igfbp2/Clip3/Zfp324/Map3k12/Prrx2/Dennd2c/Gm33700/Gm27711/B9d2/Gm8953/Gm21939/Nt5dc2/Maneal/Gadd45g/Fut4-ps1/2810459M11Rik/5530400K19Rik/Pacc1/Ifngr2/Tspan15/Rasd1/Nfe2l3/Gm37531/Duoxa2/Pnpla1/Gm4810/Ehhadh/Gm8378/G…	107
Vega_Duxbl_up_in_KO	Vega_Duxbl_up_in_KO	14/323	28/1272	0.5	1.96904	3.02379	0.00400631	0.0106835	0.00562289	Gm11543/Zfp560/Dennd4c/Gm21939/Tmem92/Gm5939/Zscan4d/Arhgef26/Gm6264/Antxr1/Gm12823/Gm16332/Gm48399/AA623943	14
MT2 proximal/chimeric	MT2 proximal/chimeric	94/323	316/1272	0.297468	1.17145	2.05024	0.0249692	0.0499384	0.0262834	AA414992/Gm43049/Gm47808/Gm48754/Gm24745/Gm28826/Gm12789/Ighv1-60/Gm7627/Stox1/Gm32932/Usp17lc/9130227L01Rik/4933440M02Rik/Gm21839/Gm33466/Dyrk3/Eif4a3l2/Fbxo34/Gm47897/Fam83b/Gm45593/Synm/Gm48799/Gm45659/9530059O14Rik/Gm48492/Apol7e/Gm44660/Gm48764/Gm38825/Gm9519/Gm48829/Gm47593/Gm18204/Eif4a3l1/0610040J01Rik/Gm48931/Cpd/Lmx1a/Csrnp3/Gm13964/Gal3st2/2610206C17Rik/Gm48271/Arsk/Gm4340/Lbp/Gm10653/…	94
E2C_up-regulated_in_KO	E2C_up-regulated_in_KO	34/323	114/1272	0.298246	1.17452	1.13887	0.152406	0.243849	0.128342	Gpr50/Gm36976/Gm21761/Msx1/Eomes/C2cd4b/Gm6489/Zscan4-ps1/Sp9/Dusp5/Plekho2/Gm5542/Gm5053/Gm8953/Lysmd1/Gm7286/Gm11544/2810459M11Rik/Gm9117/Zscan5b/Gm49052/Gm4810/Tcstv1/Gm45551/Gm20767/Gm5442/A430060F13Rik/Suv39h1/Gm9458/Zfp976/Gm10264/Dusp9/Gla/AA623943	34
Distal	Distal	51/323	200/1272	0.255	1.00421	0.0378264	0.516215	0.688287	0.362256	Gm5117/Gm9621/Gm4799/BC080695/Gtpbp4-ps3/Ttc30b/Cnnm2/Gm21542/Gal3st2c/Spz1/Gm3631/Vmn1r227/Ppp1r2-ps7/Gtpbp4-ps6/Gm50179/Gm12626/Gm4971/Hmgn3/Gm11843/Gm12623/Gm47043/Zc3h12b/Fgfrl1/Gm16345/Gm33994/Gm48629/Gm29761/Rbbp6/Gm15362/Gm44168/Slc19a3/Gm33973/Gm5435/Gm36718/1700093K21Rik/Gm16344/Dbndd2/Gm50243/Chst7/Slfn10-ps/Gm38153/Thsd1/Prr15l/Gm9586/Pigyl/Cabp7/Gm16332/Ecm2/Gm43025/Gm44052/Gm5575	51
MacFarlan_MERVL_chimeric	MacFarlan_MERVL_chimeric	8/323	44/1272	0.181818	0.716015	-1.11806	0.906274	0.988861	0.520453	Zfp352/Mbd5/Apol7e/Arsk/Gm4340/Slc19a3/Zfp54/AF067063	8
L2C_down-regulated_in_KO	L2C_down-regulated_in_KO	182/323	783/1272	0.232439	0.915365	-2.2275	0.988861	0.988861	0.520453	AA414992/Gm5117/Gm9621/AU015228/Gm44183/AA543401/Gm4799/Gm43049/Gm47808/Gm48754/Gm24745/Gm28826/Gpatch3/Gm12789/Pld6/Ighv1-60/Gm7627/Stox1/Cd36/BC080695/Gtpbp4-ps3/Gm32932/Ttc30b/Cnnm2/Usp17lc/Vmn2r-ps61/9130227L01Rik/4933440M02Rik/Gm21542/Cby3/Gm21839/Gm33466/Gal3st2c/Dyrk3/Spz1/Eif4a3l2/Fbxo34/Gm3631/Gm47897/Vmn1r227/Fam83b/Ppp1r2-ps7/Mbl2/Os9/Synm/Gm48799/Gm45659/9530059O14Rik/Gm48492/Gtpbp4-p…	182
